# Supplementary material
Source: PubMed Central journal article supplement (PMC3049961)
Supplement: NIHMS266451-supplement-3_si_003.pdf [file NIHMS266451-supplement-3_si_003.pdf]

## **Supplemental Data**

Note: Tables S1 and S2 are Excel Spreadsheets

### **Table S1: Table of pPeptides Identified by PhosphoScan Mass Spectrometry**

Shown are all the peptides identified by SpectrumMill with their quantification across all the samples, obtained as described in Materials and Methods. Each peak represents an occurrence of a peptide with unique sequence and charge. Lowercase s,t, and y represent phosphorylated residues while unmodified residues are written in uppercase. Also shown is average Log 2 intensity for all peaks from all the samples and their differences. “t” and “p” values for each peak differences derived from ANOVA analysis are shown.

### **Table S2: Table of Pathway Studio Interactions**

This table shows the relations that are obtained in pathway analysis using Pathway Studio (Ariadne Genomics, Inc) shown in Fig. 1F by. It shows molecules for which a given relation is found, type of relation, limited quote from literature and medline references that supports a particular relation.

| Locus       | U251   |        | LN428  |        | LNZ308 |        | U87    |        |
|-------------|--------|--------|--------|--------|--------|--------|--------|--------|
|             | 1      | 2      | 1      | 2      | 1      | 2      | 1      | 2      |
| AMEL        | 111.29 | 106.09 | 111.5  | 106.43 | 105.83 | 0.00   | 106.26 | 0.00   |
| D3s<br>1358 | 134.75 | 130.92 | 134.61 | 130.92 | 126.74 | 0.00   | 134.75 | 130.85 |
| TH01        | 177.82 | 0.00   | 177.04 | 170.26 | 177.67 | 0.00   | 177.40 | 0.00   |
| D13s<br>317 | 188.72 | 184.86 | 176.51 | 0.00   | 196.75 | 188.86 | 188.49 | 176.74 |
| D8s<br>1179 | 233.90 | 225.73 | 224.61 | 220.60 | 225.57 | 205.35 | 217.12 | 213.08 |
| D7s<br>820  | 237.82 | 229.56 | 236.7  | 220.47 | 237.57 | 229.47 | 225.04 | 220.97 |
| TPOX        | 268.82 | 0.00   | 280.49 | 267.83 | 273.31 | 269.04 | 268.34 | 0.00   |
| D16s<br>539 | 294.86 | 0.00   | 280.91 | 0.00   | 294.94 | 282.09 | 294.38 | 0.00   |
| D18s<br>51  | 305.82 | 0.00   | 321.09 | 305.01 | 329.73 | 305.75 | 305.44 | 0.00   |
| CSF1<br>PO  | 344.95 | 340.60 | 336.07 | 0.00   | 345.18 | 340.95 | 340.55 | 336.31 |
| Penta<br>D  | 422.84 | 0.00   | 428.12 | 0.00   | 418.31 | 408.41 | 433.07 | 408.32 |
| Penta<br>E  | 412.09 | 396.06 | 444.4  | 433.69 | 412.53 | 396.32 | 433.78 | 396.07 |

**Table S3: STR Fingerprinting consensus results of the lines used.**

Shown are the allele sizes obtained by analysis of genomic DNA from the three cell lines used in this manuscript, and analyzed using the GenomeLab Human STR Primer set from Beckman Coulter, according to the manufacturer's instructions. 0.00 indicates that no second allele was observed for this marker. While we do not claim that our isolates of these cell lines are their definitive instances, these data allow specific identification of our lines, and potentially comparison to the lines from other laboratories using this analysis.
