# Supplementary material
Source: PubMed Central journal article supplement (PMC3049961)
Supplement: NIHMS266451-supplement-4_si_004.pdf [file NIHMS266451-supplement-4_si_004.pdf]

# Peak 1

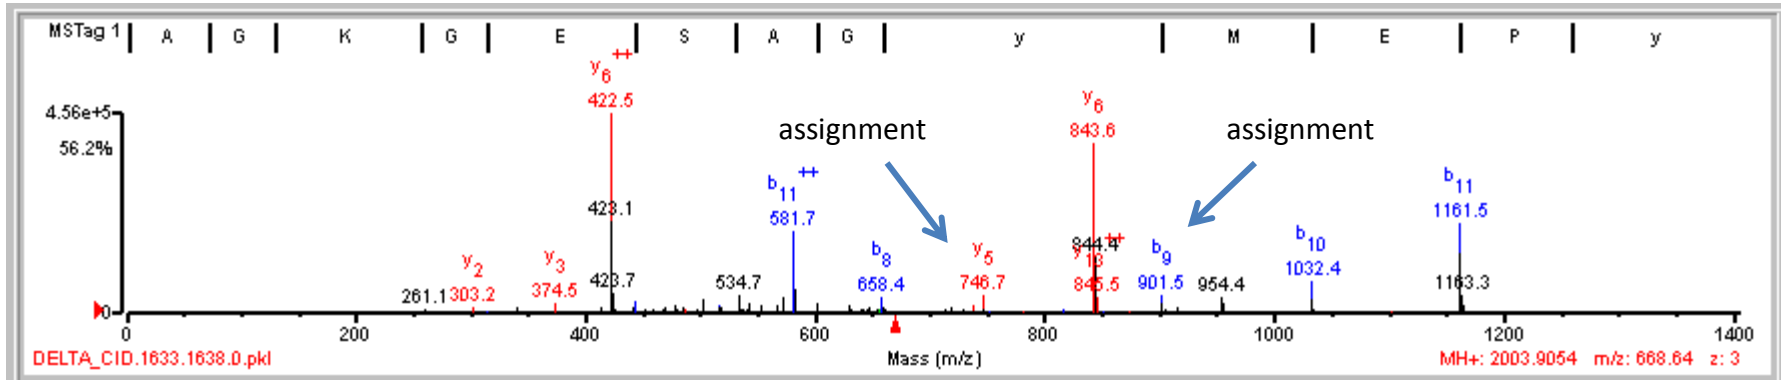

| Rank                    | Score  | SPI (%)        | BCS                          | # Unmatched ions | Variable sites | Sequence                                     | MH <sup>+</sup> Calculated (Da) | MH <sup>+</sup> Error (Da) | MH <sup>+</sup> Error (ppm) | Protein MW/pI (Da) | Species                                         | Accession #                   | MS-Digest Index #     | Protein Name                                       |                                                 |                               |                |                               |                                 |                               |                |                |                 |                 |
|-------------------------|--------|----------------|------------------------------|------------------|----------------|----------------------------------------------|---------------------------------|----------------------------|-----------------------------|--------------------|-------------------------------------------------|-------------------------------|-----------------------|----------------------------------------------------|-------------------------------------------------|-------------------------------|----------------|-------------------------------|---------------------------------|-------------------------------|----------------|----------------|-----------------|-----------------|
| 1                       | 16.68  | 91.1           | 10                           | 6/24             | Y268y          | (K)A G K G E S A G y M E I P / Y I A Q R (I) | 1843.83                         | 80.2475                    | 146.1                       | 55042.5/9.10       | Homo sapiens                                    | <a href="#">106879210</a>     | <a href="#">23534</a> | Src homology 2 domain containing adaptor protein B |                                                 |                               |                |                               |                                 |                               |                |                |                 |                 |
| Fragment-ion (m/z)      | 233.14 | 374.41         | 382.52                       | 443.68           | 479.14         | 503.70                                       | 517.67                          | 543.77                     | 563.84                      | 567.94             | 572.81                                          | 581.88                        | 601.88                | 666.97                                             | 702.87                                          | 711.80                        | 763.83         | 776.12                        | 811.52                          | 875.96                        | 892.60         | 901.45         | 1032.45         | 1161.52         |
| Frac. Inten. (% of TIC) | 1.06   | 2.77           | 12.96                        | 1.02             | 1.75           | 4.78                                         | 1.99                            | 1.09                       | 1.44                        | 1.59               | 3.86                                            | 10.97                         | 1.15                  | 3.38                                               | 1.01                                            | 1.25                          | 27.79          | 0.91                          | 0.97                            | 1.33                          | 2.61           | 3.66           | 2.38            | 8.28            |
| Rel. Inten. (% of BP)   | 3.82   | 9.98           | 46.62                        | 3.68             | 6.29           | 17.22                                        | 7.16                            | 3.93                       | 5.17                        | 5.73               | 13.90                                           | 39.47                         | 4.13                  | 12.15                                              | 3.65                                            | 4.48                          | 100.00         | 3.29                          | 3.48                            | 4.79                          | 9.39           | 13.19          | 8.55            | 29.81           |
| Score                   | -0.04  | 1.00           | 1.00                         | 1.00             | -0.06          | 1.00                                         | -0.07                           | -0.04                      | -0.05                       | -0.06              | 0.50                                            | 1.00                          | 1.00                  | 1.00                                               | 0.50                                            | 1.00                          | 1.00           | 1.00                          | 1.00                            | 1.00                          | 1.00           | 1.00           | 1.00            | 1.00            |
| Ion-type                |        | y <sub>3</sub> | y <sup>++</sup> <sub>6</sub> | b <sub>5</sub>   |                | y <sub>4</sub>                               |                                 |                            |                             |                    | a <sub>7</sub>                                  | b <sup>++</sup> <sub>11</sub> | b <sub>7</sub>        | y <sub>5</sub>                                     | b <sup>++</sup> <sub>13</sub> -H <sub>2</sub> O | b <sup>++</sup> <sub>13</sub> | y <sub>6</sub> | b <sup>++</sup> <sub>14</sub> | b <sup>++</sup> <sub>15</sub>   | b <sup>++</sup> <sub>16</sub> | y <sub>7</sub> | b <sub>9</sub> | b <sub>10</sub> | b <sub>11</sub> |
| Delta Da                |        | 0.20           | 0.33                         | 0.46             |                | 0.44                                         |                                 |                            |                             |                    | -0.49                                           | 0.66                          | 0.59                  | 0.65                                               | 0.60                                            | 0.52                          | 0.46           | 0.32                          | 0.20                            | 0.62                          | 0.18           | 0.10           | 0.06            | 0.09            |
|                         |        |                |                              |                  |                |                                              |                                 |                            |                             |                    | b <sup>++</sup> <sub>11</sub> -H <sub>2</sub> O |                               |                       |                                                    |                                                 |                               |                |                               | y <sub>7</sub> -NH <sub>3</sub> |                               |                |                |                 |                 |
|                         |        |                |                              |                  |                |                                              |                                 |                            |                             |                    | 0.60                                            |                               |                       |                                                    |                                                 |                               |                |                               | 0.57                            |                               |                |                |                 |                 |

# Peak 2

Ions that verify assignment

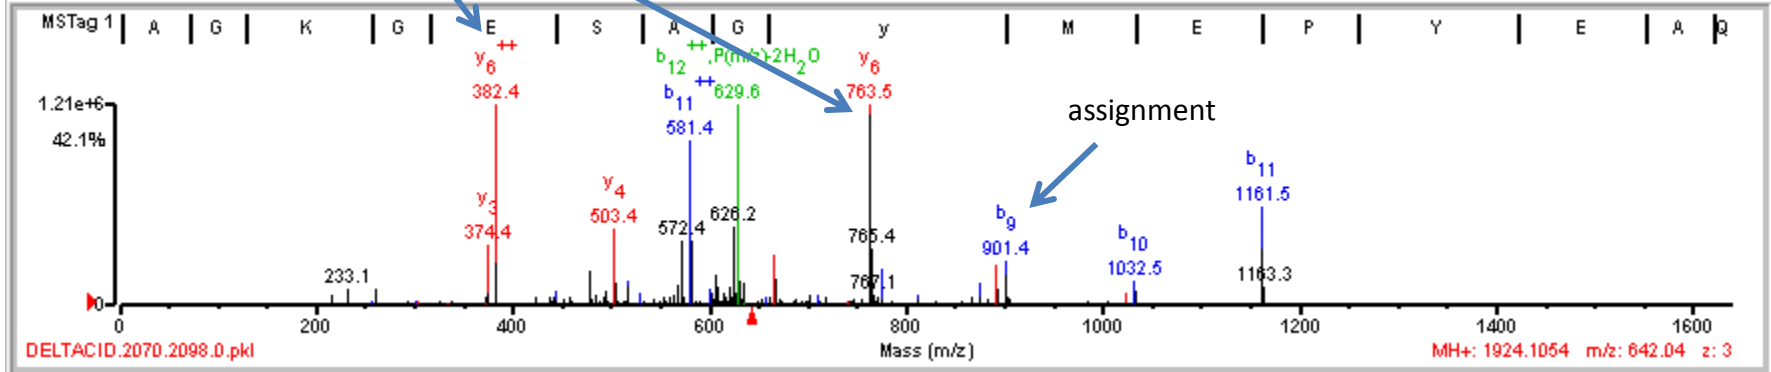

| Rank                   | Score          | SPI (%)                      | BCS            | # Unmatched Ions | Variable sites                | Sequence                                                   | MH <sup>+</sup> Calculated (Da) | MH <sup>+</sup> Error (Da) | MH <sup>+</sup> Error (ppm)                      | Protein MW/pi (Da)             | Species        | Accession #               | MS-Digest Index #     | Protein Name                                       |        |        |        |                |                |                                |                                 |                |                |                 |                 |
|------------------------|----------------|------------------------------|----------------|------------------|-------------------------------|------------------------------------------------------------|---------------------------------|----------------------------|--------------------------------------------------|--------------------------------|----------------|---------------------------|-----------------------|----------------------------------------------------|--------|--------|--------|----------------|----------------|--------------------------------|---------------------------------|----------------|----------------|-----------------|-----------------|
| 1                      | 17.56          | 87.5                         | 9              | 7/25             | Y268y                         | (K)A G K G E   S A \ G y \ M   E   P / Y / E   A Q \ R (I) | 1843.83                         | 80.2775                    | 161.7                                            | 55042.5/9.10                   | Homo sapiens   | <a href="#">106879210</a> | <a href="#">23534</a> | Src homology 2 domain containing adaptor protein B |        |        |        |                |                |                                |                                 |                |                |                 |                 |
| Fragment-ion (m/z)     | 374.39         | 382.37                       | 443.34         | 478.94           | 494.68                        | 503.37                                                     | 516.96                          | 567.36                     | 572.37                                           | 581.37                         | 601.42         | 607.52                    | 609.28                | 620.95                                             | 626.24 | 632.30 | 634.92 | 666.46         | 763.52         | 775.98                         | 875.43                          | 892.47         | 901.38         | 1032.52         | 1161.46         |
| Frac. Inten.(% of TIC) | 3.05           | 10.50                        | 0.90           | 2.06             | 0.88                          | 4.12                                                       | 1.78                            | 1.38                       | 3.98                                             | 9.75                           | 1.88           | 1.68                      | 0.03                  | 1.21                                               | 4.25   | 1.03   | 0.94   | 3.15           | 28.68          | 1.90                           | 1.28                            | 2.39           | 3.81           | 2.14            | 7.24            |
| Rel. Inten.(% of BP)   | 10.64          | 36.62                        | 3.14           | 7.19             | 3.06                          | 14.35                                                      | 6.20                            | 4.83                       | 13.88                                            | 33.97                          | 6.56           | 5.84                      | 0.11                  | 4.20                                               | 14.83  | 3.58   | 3.26   | 10.99          | 100.00         | 6.61                           | 4.46                            | 8.32           | 13.27          | 7.45            | 25.25           |
| Score                  | 1.00           | 1.00                         | 1.00           | -0.07            | 1.00                          | 1.00                                                       | 1.00                            | -0.05                      | 0.50                                             | 1.00                           | 1.00           | -0.06                     | 1.50                  | -0.04                                              | -0.15  | -0.04  | -0.03  | 1.00           | 1.00           | 1.00                           | 1.00                            | 1.00           | 1.00           | 1.00            | 1.00            |
| Ion-type               | y <sub>3</sub> | y <sub>6</sub> <sup>++</sup> | b <sub>5</sub> |                  | y <sub>6</sub> <sup>+++</sup> | y <sub>4</sub>                                             | b <sub>10</sub> <sup>+++</sup>  |                            | b <sub>11</sub> <sup>+++</sup> -H <sub>2</sub> O | b <sub>11</sub> <sup>+++</sup> | b <sub>7</sub> |                           | sty                   |                                                    |        |        |        | y <sub>5</sub> | y <sub>6</sub> | b <sub>14</sub> <sup>+++</sup> | b <sub>16</sub> <sup>+++</sup>  | y <sub>7</sub> | b <sub>9</sub> | b <sub>10</sub> | b <sub>11</sub> |
| Delta Da               | 0.18           | 0.18                         | 0.12           |                  | 0.15                          | 0.11                                                       | 0.26                            |                            | 0.16                                             | 0.15                           | 0.13           |                           | 0.00                  |                                                    |        |        |        | 0.14           | 0.15           | 0.18                           | 0.09                            | 0.05           | 0.03           | 0.13            | 0.03            |
|                        |                |                              |                |                  |                               |                                                            |                                 |                            |                                                  |                                |                |                           |                       |                                                    |        |        |        |                |                |                                | y <sub>7</sub> -NH <sub>3</sub> |                |                |                 |                 |

# Peak 3

Ions that verify assignment

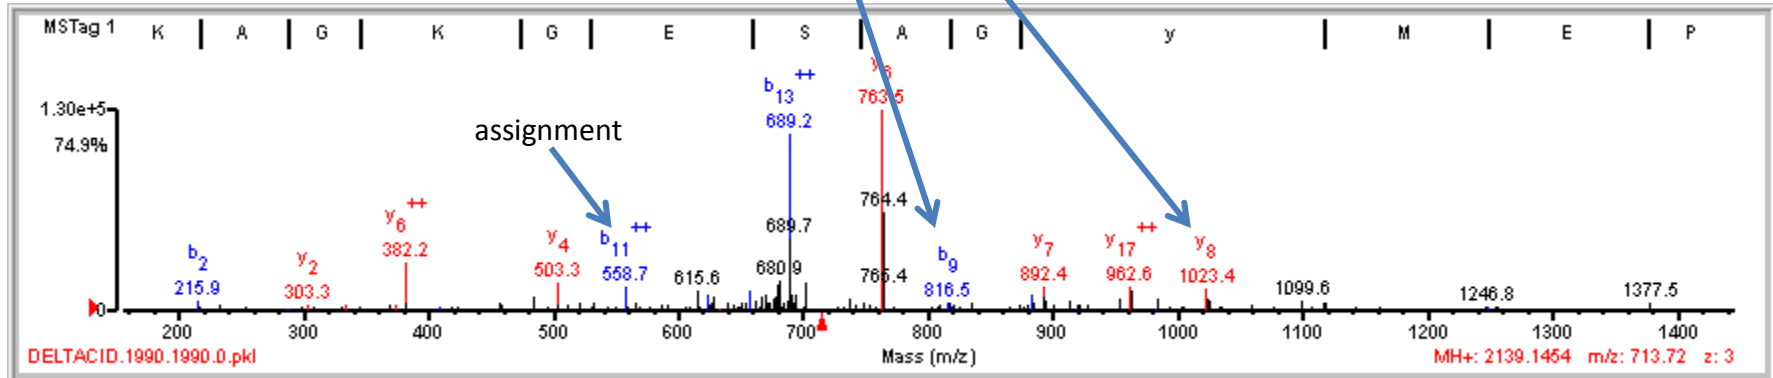

| Rank                    | Score            | SPI (%)                          | BCS            | # Unmatched Ions  | Variable sites                      | Sequence                                             | MH <sup>+</sup> Calculated (Da) | MH <sup>+</sup> Error (Da) | MH <sup>+</sup> Error (ppm) | Protein MW/pl (Da) | Species      | Accession #                         | MS-Digest Index #     | Protein Name                                       |        |        |                |                |                   |                |                   |                |                 |
|-------------------------|------------------|----------------------------------|----------------|-------------------|-------------------------------------|------------------------------------------------------|---------------------------------|----------------------------|-----------------------------|--------------------|--------------|-------------------------------------|-----------------------|----------------------------------------------------|--------|--------|----------------|----------------|-------------------|----------------|-------------------|----------------|-----------------|
| 1                       | 14.12            | 89.0                             | 8              | 7/23              | Y268y                               | (K)S K/A G K G E\ S A\ G Y I M I E\ P Y/E\ A Q R (I) | 2058.95                         | 80.1905                    | 104.8                       | 55042.5/9.10       | Homo sapiens | <a href="#">106879210</a>           | <a href="#">23534</a> | Src homology 2 domain containing adaptor protein B |        |        |                |                |                   |                |                   |                |                 |
| Fragment-ion (m/z)      | 382.20           | 485.32                           | 503.29         | 558.71            | 615.58                              | 624.65                                               | 626.53                          | 629.44                     | 658.15                      | 667.15             | 670.74       | 679.88                              | 689.19                | 694.45                                             | 703.28 | 748.30 | 763.47         | 816.54         | 883.79            | 892.45         | 962.65            | 1023.43        | 1116.73         |
| Frac. Inten. (% of TIC) | 4.44             | 1.18                             | 2.63           | 2.16              | 2.37                                | 1.78                                                 | 1.32                            | 1.64                       | 1.76                        | 1.34               | 1.91         | 4.74                                | 20.62                 | 1.45                                               | 2.09   | 1.22   | 28.80          | 1.88           | 2.15              | 4.57           | 4.46              | 3.52           | 1.95            |
| Rel. Inten. (% of BP)   | 15.40            | 4.11                             | 9.12           | 7.51              | 8.22                                | 6.17                                                 | 4.60                            | 5.70                       | 6.10                        | 4.66               | 6.65         | 16.47                               | 71.60                 | 5.05                                               | 7.25   | 4.23   | 100.00         | 6.52           | 7.45              | 15.87          | 15.48             | 12.23          | 6.78            |
| Score                   | 1.00             | 0.50                             | 1.00           | 1.00              | 0.50                                | 1.00                                                 | -0.05                           | -0.06                      | 1.00                        | -0.05              | -0.07        | 0.50                                | 1.00                  | -0.05                                              | -0.07  | -0.04  | 1.00           | 1.00           | 1.00              | 1.00           | 1.00              | 1.00           | 1.00            |
| Ion-type                | Y <sup>++8</sup> | Y <sub>4</sub> -H <sub>2</sub> O | Y <sub>4</sub> | b <sup>++11</sup> | b <sup>++12</sup> -H <sub>2</sub> O | b <sup>++12</sup>                                    |                                 |                            | b <sub>7</sub>              |                    |              | b <sup>++13</sup> -H <sub>2</sub> O | b <sup>++13</sup>     |                                                    |        |        | Y <sub>8</sub> | b <sub>9</sub> | b <sup>++16</sup> | Y <sub>7</sub> | Y <sup>++17</sup> | Y <sub>8</sub> | b <sub>11</sub> |
| Delta Da                | 0.01             | 0.07                             | 0.03           | -0.03             | 0.33                                | 0.39                                                 |                                 |                            | -0.20                       |                    |              | 0.10                                | 0.41                  |                                                    |        |        | 0.10           | 0.12           | 0.43              | 0.03           | 0.25              | -0.03          | 0.26            |



# Peak 5

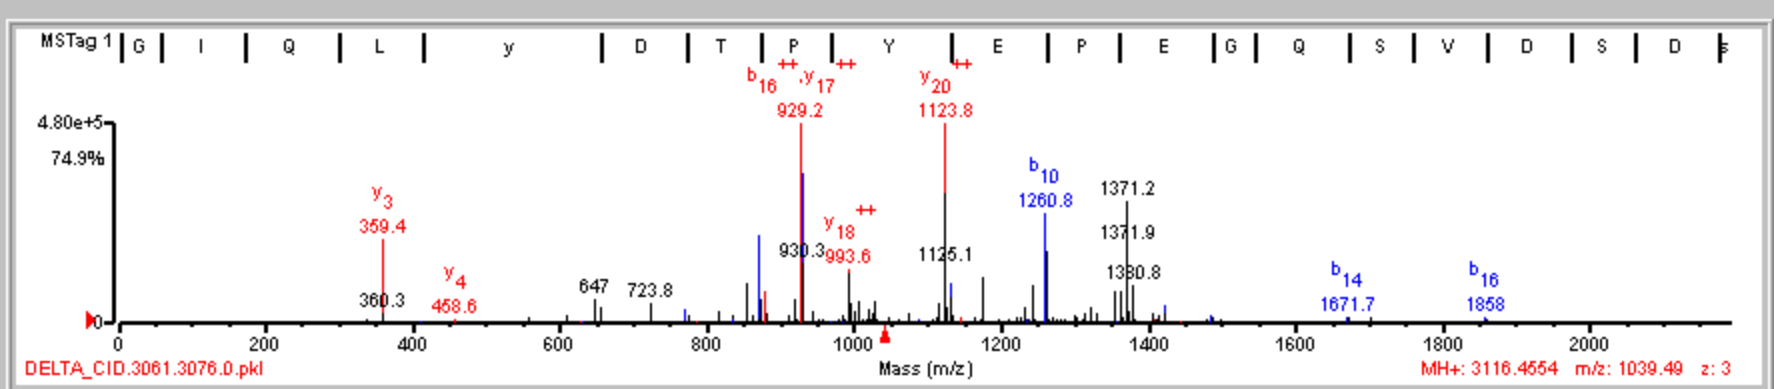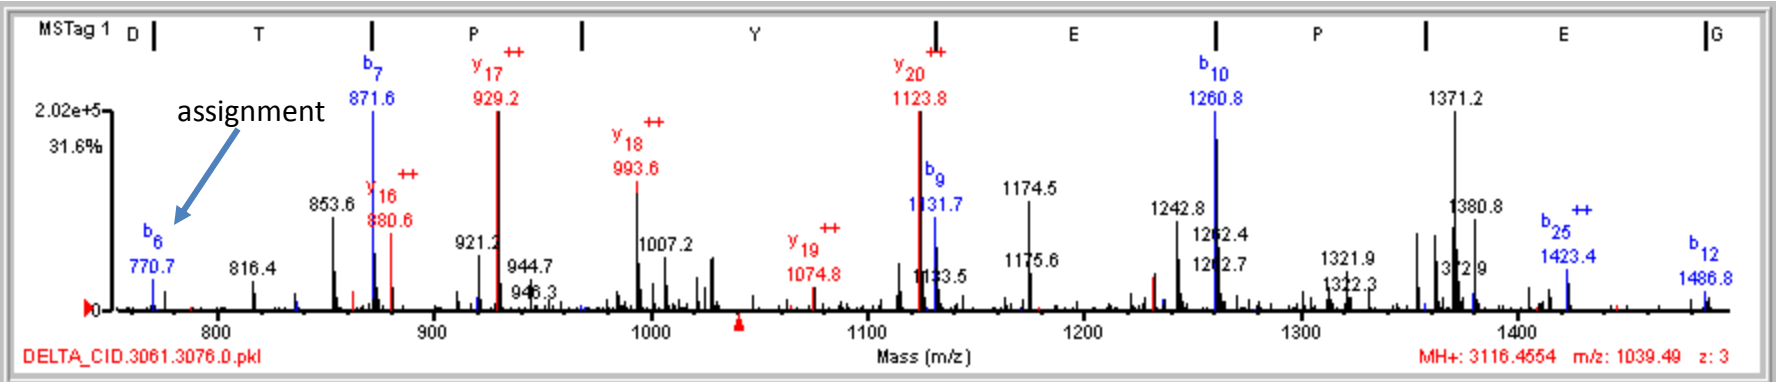

| Rank                    | Score          | SPI (%)                        | BCS                           | # Unmatched Ions                | Variable sites                                  | Sequence                                                       | MH <sup>+</sup> Calculated (Da) | MH <sup>+</sup> Error (Da)    | MH <sup>+</sup> Error (ppm)   | Protein MW/pl (Da) | Species      | Accession #                                     | MS-Digest Index #             | Protein Name                                       |                               |                               |                                  |                                  |         |                               |         |         |         |         |                                |
|-------------------------|----------------|--------------------------------|-------------------------------|---------------------------------|-------------------------------------------------|----------------------------------------------------------------|---------------------------------|-------------------------------|-------------------------------|--------------------|--------------|-------------------------------------------------|-------------------------------|----------------------------------------------------|-------------------------------|-------------------------------|----------------------------------|----------------------------------|---------|-------------------------------|---------|---------|---------|---------|--------------------------------|
| 1                       | 17.83          | 83.0                           | 13                            | 5/25                            | Y297y S307s                                     | (K)G I Q L/y/D/T/P Y E P/E G Q/s\VD S D S E/S\T V I S\ P R (L) | 2956.33                         | 160.1224                      | 60.9                          | 55042.5/9.10       | Homo sapiens | <a href="#">106879210</a>                       | <a href="#">23534</a>         | Src homology 2 domain containing adaptor protein B |                               |                               |                                  |                                  |         |                               |         |         |         |         |                                |
| Fragment-ion (m/z)      | 359.39         | 646.98                         | 723.80                        | 853.59                          | 871.59                                          | 880.63                                                         | 920.40                          | 929.16                        | 993.62                        | 1000.87            | 1007.15      | 1114.68                                         | 1123.84                       | 1131.66                                            | 1174.52                       | 1231.80                       | 1242.82                          | 1260.79                          | 1321.92 | 1353.69                       | 1362.13 | 1370.78 | 1371.24 | 1380.75 | 1423.35                        |
| Frac. Inten. (% of TIC) | 3.64           | 1.25                           | 1.14                          | 2.70                            | 5.13                                            | 1.70                                                           | 1.85                            | 18.54                         | 5.59                          | 0.04               | 0.04         | 1.91                                            | 16.49                         | 3.16                                               | 2.87                          | 1.32                          | 3.14                             | 9.16                             | 1.51    | 1.95                          | 2.45    | 1.35    | 9.63    | 2.08    | 1.36                           |
| Rel. Inten. (% of BP)   | 19.64          | 6.76                           | 6.15                          | 14.55                           | 27.64                                           | 9.18                                                           | 10.00                           | 30.16                         | 0.20                          | 0.24               | 10.00        | 10.28                                           | 88.92                         | 17.04                                              | 15.46                         | 7.13                          | 16.95                            | 49.40                            | 8.13    | 10.51                         | 13.21   | 7.28    | 51.92   | 11.21   | 7.35                           |
| Score                   | 1.00           | 1.00                           | 1.00                          | 1.00                            | 1.00                                            | 1.00                                                           | 1.00                            | 1.00                          | 1.00                          | 0.25               | 1.50         | 0.50                                            | 1.00                          | 1.00                                               | 1.00                          | 1.00                          | 0.50                             | 1.00                             | -0.08   | 1.00                          | -0.13   | -0.07   | -0.52   | -0.11   | 1.00                           |
| Ion-type                | y <sub>3</sub> | b <sup>+++</sup> <sub>16</sub> | y <sup>++</sup> <sub>13</sub> | b <sup>+++</sup> <sub>22</sub>  | b <sub>7</sub>                                  | y <sup>++</sup> <sub>16</sub>                                  | b <sup>+++</sup> <sub>15</sub>  | y <sup>++</sup> <sub>17</sub> | y <sup>++</sup> <sub>18</sub> | st                 | sty          | b <sub>9</sub> -NH <sub>3</sub>                 | y <sup>++</sup> <sub>20</sub> | b <sub>9</sub>                                     | y <sup>++</sup> <sub>21</sub> | a <sub>10</sub>               | b <sub>10</sub> -NH <sub>3</sub> | b <sub>10</sub>                  |         | y <sup>++</sup> <sub>23</sub> |         |         |         |         | b <sup>+++</sup> <sub>25</sub> |
| Delta Da                | 0.19           | 0.39                           | 0.51                          | 0.27                            | 0.23                                            | 0.28                                                           | 0.55                            | 0.28                          | 0.22                          | 0.11               | 0.38         | 0.23                                            | 0.38                          | 0.18                                               | 0.54                          | -0.72                         | -0.67                            | 0.27                             |         | 0.68                          |         |         |         |         | 0.30                           |
|                         |                | y <sub>6</sub>                 |                               | b <sub>7</sub> -NH <sub>3</sub> | y <sup>++</sup> <sub>16</sub> -H <sub>2</sub> O |                                                                | b <sup>+++</sup> <sub>24</sub>  |                               |                               |                    |              | y <sup>++</sup> <sub>20</sub> -H <sub>2</sub> O |                               |                                                    |                               | y <sup>++</sup> <sub>22</sub> |                                  | y <sub>12</sub> -NH <sub>3</sub> |         |                               |         |         |         |         |                                |
|                         |                | 0.63                           |                               | -0.74                           | 0.24                                            |                                                                | 0.37                            |                               |                               |                    |              | 0.23                                            |                               |                                                    | 0.30                          |                               |                                  | -0.76                            |         |                               |         |         |         |         |                                |

# Peak 6

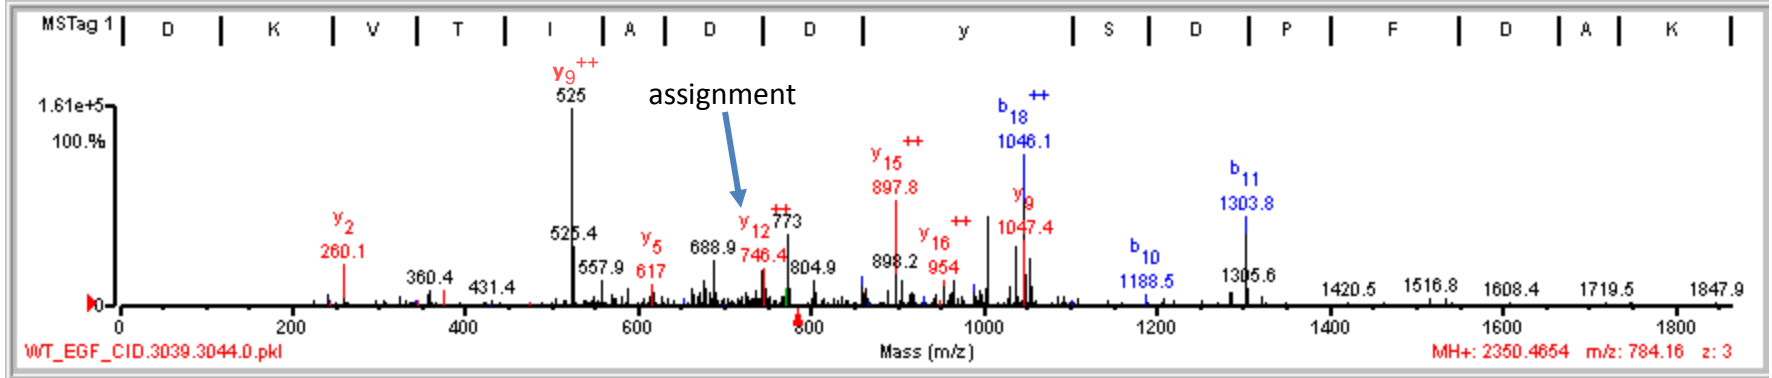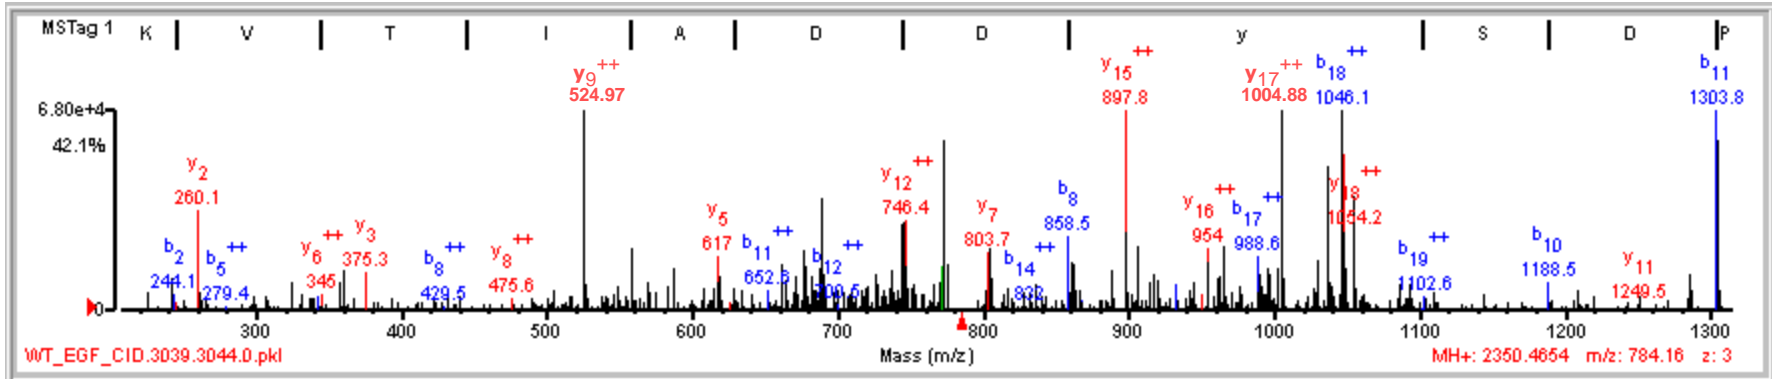

| Rank                    | Score          | SPI (%)                       | BCS            | # Unmatched Ions | Variable sites | Sequence                                      | MH* Calculated (Da)             | MH* Error (Da) | MH* Error (ppm)                 | Protein MW/pl (Da)              | Species        | Accession #               | MS-Digest Index #               | Protein Name                                       |        |                                 |                                                   |                                 |                                                   |                                 |                                 |         |                                   |                 |
|-------------------------|----------------|-------------------------------|----------------|------------------|----------------|-----------------------------------------------|---------------------------------|----------------|---------------------------------|---------------------------------|----------------|---------------------------|---------------------------------|----------------------------------------------------|--------|---------------------------------|---------------------------------------------------|---------------------------------|---------------------------------------------------|---------------------------------|---------------------------------|---------|-----------------------------------|-----------------|
| 1                       | 18.58          | 93.0                          | 12             | 3/24             | Y246y          | (K)D K V T I A D D y S D P F D A K N D L K(S) | 2270.08                         | 80.3831        | 177.3                           | 55042.5/9.10                    | Homo sapiens   | <a href="#">106879210</a> | <a href="#">23534</a>           | Src homology 2 domain containing adaptor protein B |        |                                 |                                                   |                                 |                                                   |                                 |                                 |         |                                   |                 |
| Fragment-ion (m/z)      | 260.12         | 524.97                        | 557.86         | 617.02           | 677.91         | 688.90                                        | 726.22                          | 743.96         | 746.15                          | 746.44                          | 803.71         | 858.50                    | 897.77                          | 954.02                                             | 965.66 | 988.61                          | 995.67                                            | 1004.88                         | 1037.62                                           | 1046.06                         | 1054.24                         | 1054.80 | 1285.56                           | 1303.79         |
| Frac. Inten. (% of TIC) | 2.22           | 12.89                         | 1.99           | 1.50             | 2.21           | 3.59                                          | 1.50                            | 2.27           | 1.58                            | 4.65                            | 3.93           | 1.99                      | 7.04                            | 2.15                                               | 1.46   | 2.87                            | 1.90                                              | 7.68                            | 4.12                                              | 16.55                           | 1.43                            | 3.35    | 2.14                              | 9.00            |
| Rel. Inten. (% of BP)   | 13.39          | 77.92                         | 12.05          | 9.05             | 13.38          | 21.67                                         | 9.07                            | 13.71          | 9.56                            | 28.12                           | 23.78          | 12.01                     | 42.54                           | 12.97                                              | 8.81   | 17.32                           | 11.51                                             | 46.41                           | 24.92                                             | 100.00                          | 8.65                            | 20.24   | 12.92                             | 54.38           |
| Score                   | 1.00           | 1.00                          | 1.00           | 1.00             | -0.13          | 1.00                                          | 0.50                            | 1.00           | 1.00                            | 1.00                            | 1.00           | 1.00                      | 1.00                            | 1.00                                               | -0.09  | 1.00                            | 0.50                                              | 1.00                            | 0.50                                              | 1.00                            | 1.00                            | -0.20   | 0.50                              | 1.00            |
| Ion-type                | y <sub>2</sub> | y <sub>2</sub> + <sub>9</sub> | b <sub>5</sub> | y <sub>5</sub>   |                | y <sub>6</sub>                                | b <sub>7</sub> -NH <sub>3</sub> | b <sub>7</sub> | y <sub>12</sub> + <sub>12</sub> | y <sub>12</sub> + <sub>12</sub> | y <sub>7</sub> | b <sub>9</sub>            | y <sub>15</sub> + <sub>15</sub> | y <sub>16</sub> + <sub>16</sub>                    |        | b <sub>17</sub> + <sub>17</sub> | y <sub>17</sub> + <sub>17</sub> -H <sub>2</sub> O | y <sub>17</sub> + <sub>17</sub> | b <sub>18</sub> + <sub>18</sub> -H <sub>2</sub> O | b <sub>18</sub> + <sub>18</sub> | y <sub>18</sub> + <sub>18</sub> |         | b <sub>11</sub> -H <sub>2</sub> O | b <sub>11</sub> |
| Delta Da                | -0.08          | 0.69                          | 0.53           | -0.34            |                | 0.50                                          | -0.15                           | 0.57           | -0.67                           | -0.38                           | 0.28           | 0.08                      | 0.40                            | 0.11                                               |        | 0.19                            | 0.24                                              | 0.45                            | 0.69                                              | 0.13                            | 0.27                            |         | 0.06                              | 0.28            |

# Peak 7

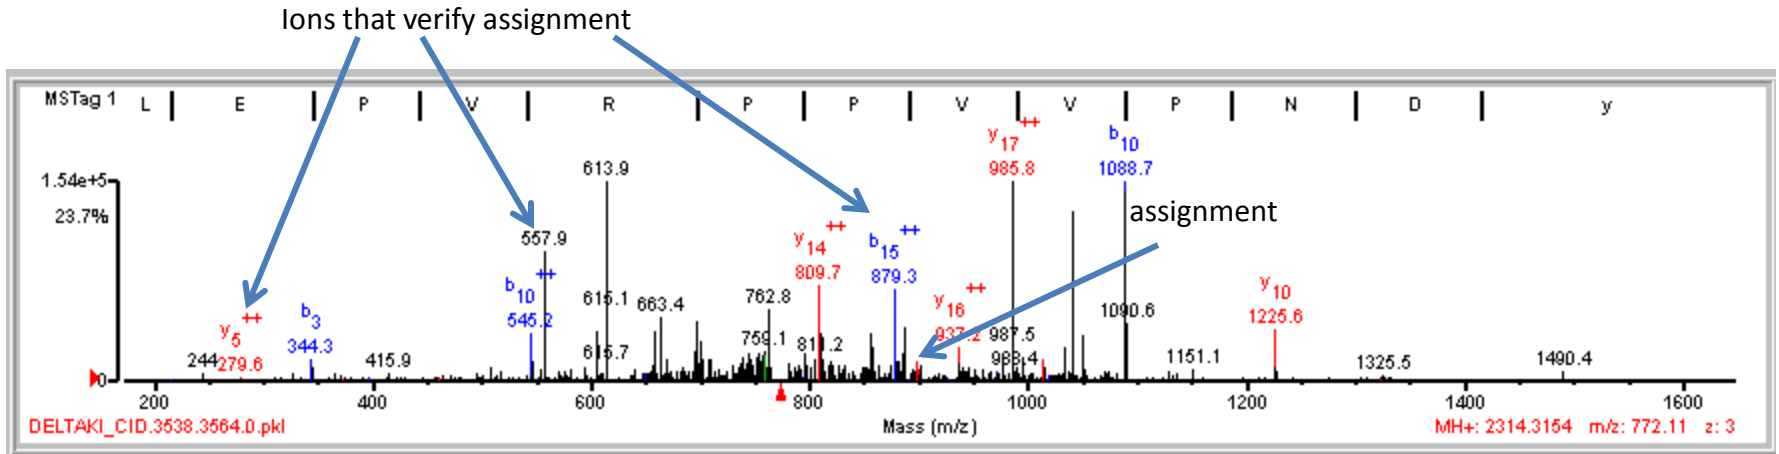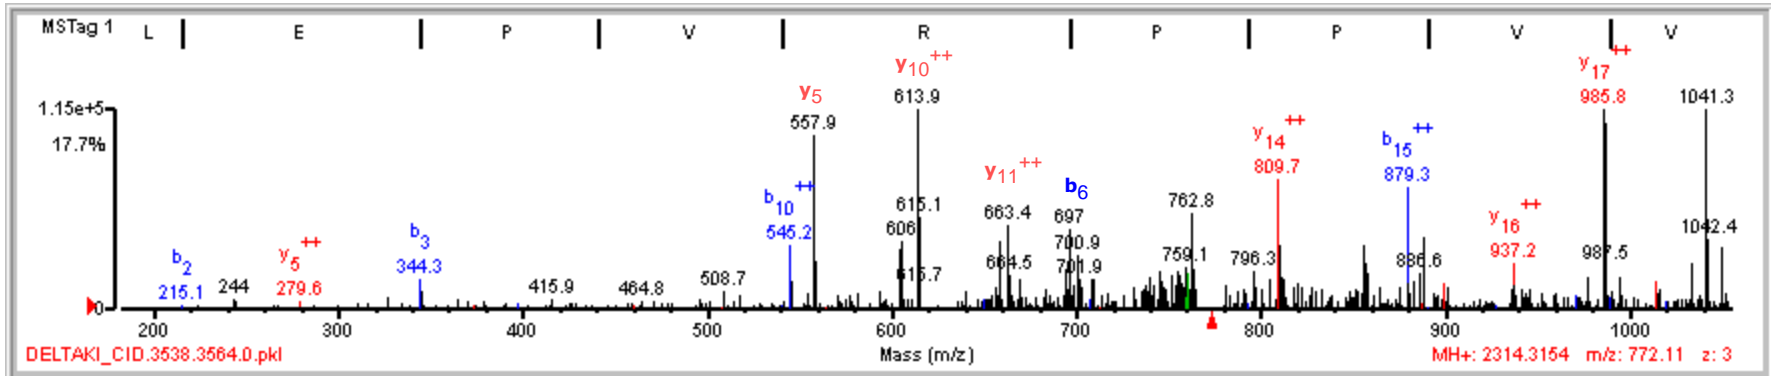

| Rank                   | Score                         | SPI (%)        | BCS                                             | # Unmatched Ions              | Variable sites                | Sequence                                                        | MH <sup>+</sup> Calculated (Da) | MH <sup>+</sup> Error (Da)    | MH <sup>+</sup> Error (ppm) | Protein MW/pl (Da) | Species      | Accession #               | MS-Digest Index #     | Protein Name                  |                               |                               |                                                 |                               |                |                                                 |                               |                               |                 |                 |         |
|------------------------|-------------------------------|----------------|-------------------------------------------------|-------------------------------|-------------------------------|-----------------------------------------------------------------|---------------------------------|-------------------------------|-----------------------------|--------------------|--------------|---------------------------|-----------------------|-------------------------------|-------------------------------|-------------------------------|-------------------------------------------------|-------------------------------|----------------|-------------------------------------------------|-------------------------------|-------------------------------|-----------------|-----------------|---------|
| 1                      | 17.56                         | 90.1           | 9                                               | 6/25                          | Y207y                         | (R) T L E / P / V R I P P V / V I P N / D \ V V I P S P T R (N) | 2233.20                         | 81.1179                       | 497.6                       | 52446.1/5.71       | Homo sapiens | <a href="#">109689723</a> | <a href="#">29029</a> | abl interactor 2              |                               |                               |                                                 |                               |                |                                                 |                               |                               |                 |                 |         |
| Fragment-ion (m/z)     | 545.25                        | 557.93         | 605.04                                          | 613.90                        | 663.44                        | 696.96                                                          | 700.94                          | 708.37                        | 740.14                      | 745.60             | 754.73       | 756.81                    | 762.82                | 809.69                        | 856.50                        | 879.33                        | 888.33                                          | 937.21                        | 977.29         | 985.77                                          | 1014.60                       | 1041.33                       | 1050.11         | 1088.74         | 1225.62 |
| Frac. Inten.(% of TIC) | 1.40                          | 3.26           | 2.00                                            | 22.47                         | 2.34                          | 1.88                                                            | 1.65                            | 1.29                          | 0.04                        | 1.47               | 1.16         | 1.08                      | 2.32                  | 4.28                          | 2.82                          | 2.42                          | 1.06                                            | 1.27                          | 1.00           | 22.60                                           | 1.01                          | 7.34                          | 1.90            | 10.36           | 1.57    |
| Rel. Inten.(% of BP)   | 6.18                          | 14.43          | 8.83                                            | 99.40                         | 10.36                         | 8.34                                                            | 7.30                            | 5.70                          | 0.18                        | 6.49               | 5.14         | 4.80                      | 10.28                 | 18.93                         | 12.47                         | 10.72                         | 4.69                                            | 5.63                          | 4.41           | 100.00                                          | 4.47                          | 32.47                         | 8.43            | 45.83           | 6.94    |
| Score                  | 1.00                          | 1.00           | 0.50                                            | 1.00                          | 1.00                          | 1.00                                                            | 1.00                            | 1.00                          | 1.50                        | -0.06              | -0.05        | -0.05                     | -0.10                 | 1.00                          | -0.12                         | 1.00                          | -0.05                                           | 1.00                          | 0.50           | 1.00                                            | 1.00                          | 0.50                          | 1.00            | 1.00            | 1.00    |
| Ion-type               | b <sup>++</sup> <sub>10</sub> | y <sub>5</sub> | y <sup>++</sup> <sub>10</sub> -H <sub>2</sub> O | y <sup>++</sup> <sub>10</sub> | y <sup>++</sup> <sub>11</sub> | b <sub>8</sub>                                                  | y <sup>+++</sup> <sub>18</sub>  | b <sup>++</sup> <sub>13</sub> | sty                         |                    |              |                           |                       | y <sup>++</sup> <sub>14</sub> | b <sup>++</sup> <sub>15</sub> | y <sup>++</sup> <sub>16</sub> | y <sup>++</sup> <sub>17</sub> -H <sub>2</sub> O | y <sup>++</sup> <sub>17</sub> | y <sub>8</sub> | y <sup>++</sup> <sub>16</sub> -H <sub>2</sub> O | y <sup>++</sup> <sub>17</sub> | y <sup>++</sup> <sub>18</sub> | b <sub>10</sub> | y <sub>10</sub> |         |
| Delta Da               | 0.42                          | 0.63           | 0.78                                            | 0.63                          | 0.64                          | 0.56                                                            | 0.59                            | 0.48                          | 1.07                        |                    |              |                           |                       | 0.30                          | 0.39                          | 0.24                          | 0.80                                            | 0.27                          | 0.17           | 0.32                                            | 0.09                          | 0.09                          | 0.10            |                 |         |





# Peak 9

Ions that verify assignment

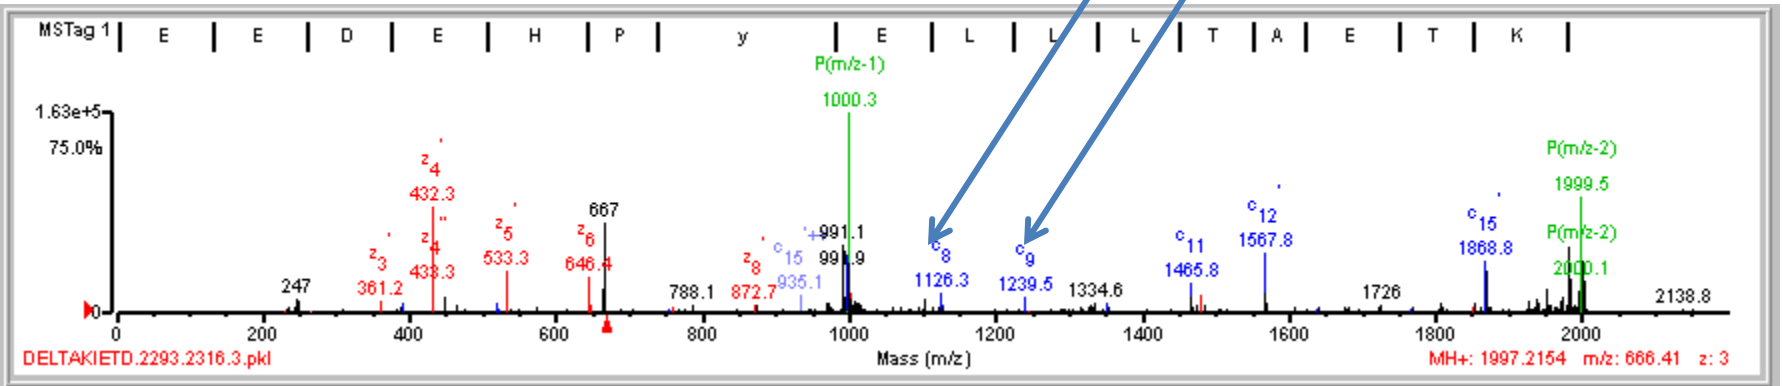

| Rank                    | Score          | SPI (%)        | BCS            | # Unmatched Ions | Variable sites    | Sequence                               | MH <sup>+</sup> Calculated (Da) | MH <sup>+</sup> Error (Da) | MH <sup>+</sup> Error (ppm) | Protein MW/pl (Da) | Species         | Accession #               | MS-Digest Index #     | Protein Name                                               |         |                 |                 |                 |         |
|-------------------------|----------------|----------------|----------------|------------------|-------------------|----------------------------------------|---------------------------------|----------------------------|-----------------------------|--------------------|-----------------|---------------------------|-----------------------|------------------------------------------------------------|---------|-----------------|-----------------|-----------------|---------|
| 1                       | 11.87          | 90.6           | 10             | 2/19             | Y455y             | (R)E E D E H P y E\L L L T A E\T\K (K) | 1916.91                         | 80.3031                    | 168.6                       | 123108.5/5.93      | Homo sapiens    | <a href="#">140161500</a> | <a href="#">30330</a> | ankyrin repeat and sterile alpha motif domain containing 1 |         |                 |                 |                 |         |
| Fragment-ion (m/z)      | 432.31         | 520.11         | 533.28         | 646.38           | 935.06            | 1003.19                                | 1126.34                         | 1239.54                    | 1352.64                     | 1465.75            | 1480.01         | 1566.81                   | 1567.76               | 1768.24                                                    | 1806.74 | 1852.78         | 1868.27         | 1868.76         | 1870.32 |
| Frac. Inten. (% of TIC) | 14.91          | 2.34           | 5.92           | 5.07             | 2.37              | 2.58                                   | 4.61                            | 2.40                       | 2.92                        | 9.70               | 2.52            | 3.85                      | 14.18                 | 2.81                                                       | 4.09    | 3.05            | 2.75            | 8.57            | 5.35    |
| Rel. Inten. (% of BP)   | 100.00         | 15.72          | 39.70          | 34.01            | 15.93             | 17.29                                  | 30.90                           | 16.11                      | 19.59                       | 65.07              | 16.89           | 25.82                     | 95.10                 | 18.85                                                      | 27.45   | 20.47           | 18.47           | 57.46           | 35.92   |
| Score                   | 1.00           | 1.00           | 1.00           | 1.00             | 1.00              | 0.25                                   | 1.00                            | 1.00                       | 1.00                        | 1.00               | 0.25            | 1.00                      | 0.25                  | 0.25                                                       | -0.27   | 0.25            | 1.00            | 0.25            | -0.36   |
| Ion-type                | z <sub>4</sub> | c <sub>4</sub> | z <sub>5</sub> | z <sub>6</sub>   | c <sub>++15</sub> | z <sub>9</sub>                         | c <sub>8</sub>                  | c <sub>9</sub>             | c <sub>10</sub>             | c <sub>11</sub>    | z <sub>12</sub> | c <sub>12</sub>           | c <sub>12</sub>       | c <sub>14</sub>                                            |         | z <sub>15</sub> | c <sub>15</sub> | c <sub>15</sub> |         |
| Delta Da                | 0.09           | -0.08          | 0.01           | 0.03             | 0.66              | 0.62                                   | -0.03                           | 0.08                       | 0.10                        | 0.13               | 0.30            | 0.14                      | 0.08                  | 0.48                                                       |         | -0.05           | 0.47            | -0.05           |         |
|                         |                |                |                |                  | y <sub>++15</sub> |                                        |                                 |                            |                             |                    |                 |                           |                       |                                                            |         |                 | y <sub>15</sub> |                 |         |
|                         |                |                |                |                  | 0.64              |                                        |                                 |                            |                             |                    |                 |                           |                       |                                                            |         |                 | 0.43            |                 |         |

# Peak 10

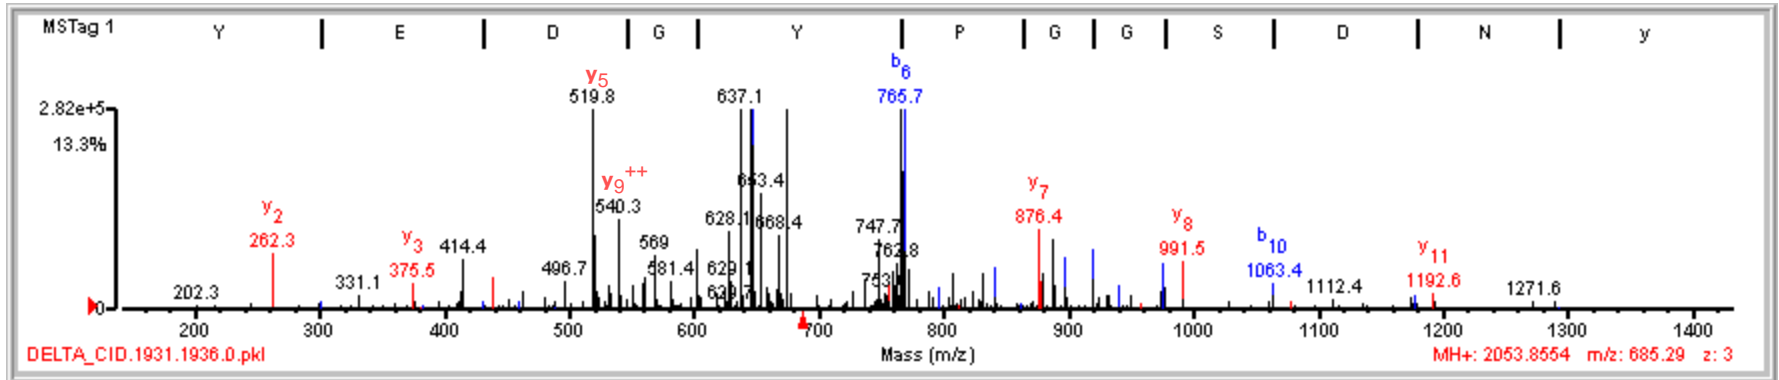

| Rank | Score | SPI (%) | BCS | # Unmatched Ions | Variable sites | Sequence                                      | MH <sup>+</sup> Calculated (Da) | MH <sup>+</sup> Error (Da) | MH <sup>+</sup> Error (ppm) | Protein MW/pI (Da) | Species      | Accession #               | MS-Digest Index #     | Protein Name                  |
|------|-------|---------|-----|------------------|----------------|-----------------------------------------------|---------------------------------|----------------------------|-----------------------------|--------------------|--------------|---------------------------|-----------------------|-------------------------------|
| 1    | 19.32 | 94.5    | 10  | 4/25             | Y228y          | (R) H Y E D G\Y P G G S/D/N Y G S\L I S R (V) | 1973.83                         | 80.0294                    | 30.7                        | 104156.3/6.49      | Homo sapiens | <a href="#">146231942</a> | <a href="#">452</a>   | catenin, delta 1 isoform 1A   |
| 1    | 19.32 | 94.5    | 10  | 4/25             | Y127y          | (R) H Y E D G\Y P G G S/D/N Y G S\L I S R (V) | 1973.83                         | 80.0294                    | 30.7                        | 96689.8/5.87       | Homo sapiens | <a href="#">146231970</a> | <a href="#">2669</a>  | catenin, delta 1 isoform 3ABC |
| 1    | 19.32 | 94.5    | 10  | 4/25             | Y127y          | (R) H Y E D G\Y P G G S/D/N Y G S\L I S R (V) | 1973.83                         | 80.0294                    | 30.7                        | 95868.9/5.92       | Homo sapiens | <a href="#">146231991</a> | <a href="#">3822</a>  | catenin, delta 1 isoform 3AB  |
| 1    | 19.32 | 94.5    | 10  | 4/25             | Y127y          | (R) H Y E D G\Y P G G S/D/N Y G S\L I S R (V) | 1973.83                         | 80.0294                    | 30.7                        | 93478.2/5.92       | Homo sapiens | <a href="#">146231946</a> | <a href="#">5131</a>  | catenin, delta 1 isoform 3B   |
| 1    | 19.32 | 94.5    | 10  | 4/25             | Y127y          | (R) H Y E D G\Y P G G S/D/N Y G S\L I S R (V) | 1973.83                         | 80.0294                    | 30.7                        | 93496.4/6.59       | Homo sapiens | <a href="#">146231977</a> | <a href="#">6337</a>  | catenin, delta 1 isoform 3AC  |
| 1    | 19.32 | 94.5    | 10  | 4/25             | Y127y          | (R) H Y E D G\Y P G G S/D/N Y G S\L I S R (V) | 1973.83                         | 80.0294                    | 30.7                        | 92675.5/6.71       | Homo sapiens | <a href="#">146231994</a> | <a href="#">7468</a>  | catenin, delta 1 isoform 3A   |
| 1    | 19.32 | 94.5    | 10  | 4/25             | Y127y          | (R) H Y E D G\Y P G G S/D/N Y G S\L I S R (V) | 1973.83                         | 80.0294                    | 30.7                        | 92675.5/6.71       | Homo sapiens | <a href="#">146231948</a> | <a href="#">8738</a>  | catenin, delta 1 isoform 3A   |
| 1    | 19.32 | 94.5    | 10  | 4/25             | Y127y          | (R) H Y E D G\Y P G G S/D/N Y G S\L I S R (V) | 1973.83                         | 80.0294                    | 30.7                        | 92675.5/6.71       | Homo sapiens | <a href="#">146231975</a> | <a href="#">10265</a> | catenin, delta 1 isoform 3A   |
| 1    | 19.32 | 94.5    | 10  | 4/25             | Y228y          | (R) H Y E D G\Y P G G S/D/N Y G S\L I S R (V) | 1973.83                         | 80.0294                    | 30.7                        | 108170.6/5.86      | Homo sapiens | <a href="#">146231940</a> | <a href="#">30706</a> | catenin, delta 1 isoform 1ABC |
| 1    | 19.32 | 94.5    | 10  | 4/25             | Y228y          | (R) H Y E D G\Y P G G S/D/N Y G S\L I S R (V) | 1973.83                         | 80.0294                    | 30.7                        | 107349.7/5.90      | Homo sapiens | <a href="#">146231962</a> | <a href="#">31626</a> | catenin, delta 1 isoform 1AB  |
| 1    | 19.32 | 94.5    | 10  | 4/25             | Y228y          | (R) H Y E D G\Y P G G S/D/N Y G S\L I S R (V) | 1973.83                         | 80.0294                    | 30.7                        | 104959.0/5.89      | Homo sapiens | <a href="#">10835010</a>  | <a href="#">33563</a> | catenin, delta 1 isoform 1B   |
| 1    | 19.32 | 94.5    | 10  | 4/25             | Y228y          | (R) H Y E D G\Y P G G S/D/N Y G S\L I S R (V) | 1973.83                         | 80.0294                    | 30.7                        | 104156.3/6.49      | Homo sapiens | <a href="#">146231938</a> | <a href="#">34647</a> | catenin, delta 1 isoform 1A   |
| 1    | 19.32 | 94.5    | 10  | 4/25             | Y228y          | (R) H Y E D G\Y P G G S/D/N Y G S\L I S R (V) | 1973.83                         | 80.0294                    | 30.7                        | 104156.3/6.49      | Homo sapiens | <a href="#">146231968</a> | <a href="#">36000</a> | catenin, delta 1 isoform 1A   |

| Fragment-ion (m/z)     | 262.27         | 414.39         | 519.83            | 540.34             | 560.57             | 568.99         | 602.93                               | 628.13             | 637.07 | 646.06                           | 653.43                               | 668.40         | 747.71         | 759.67             | 762.85             | 765.69         | 768.63                               | 771.57             | 840.71         | 876.41         | 888.30         | 897.07 | 919.39 | 976.41 | 991.50 |
|------------------------|----------------|----------------|-------------------|--------------------|--------------------|----------------|--------------------------------------|--------------------|--------|----------------------------------|--------------------------------------|----------------|----------------|--------------------|--------------------|----------------|--------------------------------------|--------------------|----------------|----------------|----------------|--------|--------|--------|--------|
| Frac. Inten.(% of TIC) | 0.78           | 0.77           | 4.27              | 1.55               | 0.68               | 1.12           | 0.96                                 | 2.35               | 16.23  | 29.94                            | 0.05                                 | 1.60           | 1.75           | 1.26               | 0.90               | 23.40          | 3.95                                 | 0.75               | 0.86           | 1.40           | 1.46           | 1.10   | 1.17   | 0.93   | 0.78   |
| Rel. Inten.(% of BP)   | 2.60           | 2.56           | 14.27             | 5.17               | 2.28               | 3.74           | 3.22                                 | 7.84               | 54.22  | 100.00                           | 0.15                                 | 5.35           | 5.84           | 4.22               | 3.00               | 78.16          | 13.18                                | 2.51               | 2.86           | 4.67           | 4.89           | 3.69   | 3.89   | 3.11   | 2.59   |
| Score                  | 1.00           | -0.03          | 1.00              | 1.00               | 1.00               | 1.00           | 1.00                                 | -0.08              | 0.50   | 1.00                             | 1.50                                 | -0.05          | 0.50           | 0.50               | 1.00               | 1.00           | 1.00                                 | -0.03              | 1.00           | 1.00           | 1.00           | 1.00   | 1.00   | 1.00   | 1.00   |
| Ion-type               | y <sub>2</sub> | y <sub>5</sub> | y <sub>9</sub> ++ | b <sub>+++15</sub> | y <sub>+++10</sub> | b <sub>5</sub> | b <sub>+++12</sub> -H <sub>2</sub> O | b <sub>+++12</sub> | sty    | b <sub>6</sub> -H <sub>2</sub> O | b <sub>+++13</sub> -H <sub>2</sub> O | y <sub>6</sub> | b <sub>6</sub> | b <sub>+++13</sub> | b <sub>+++15</sub> | y <sub>7</sub> | b <sub>+++16</sub> -H <sub>2</sub> O | b <sub>+++16</sub> | b <sub>8</sub> | b <sub>9</sub> | y <sub>8</sub> |        |        |        |        |
| Delta Da               | 0.12           | 0.54           | 0.63              | 0.04               | 0.77               | 0.71           |                                      | -0.67              | 0.82   | 0.44                             | 0.42                                 | 0.53           | 0.41           | 0.37               | 0.42               | 0.05           | 0.48                                 | 0.24               | 0.03           | 0.03           | 0.03           | 0.11   |        |        |        |

# Peak 10

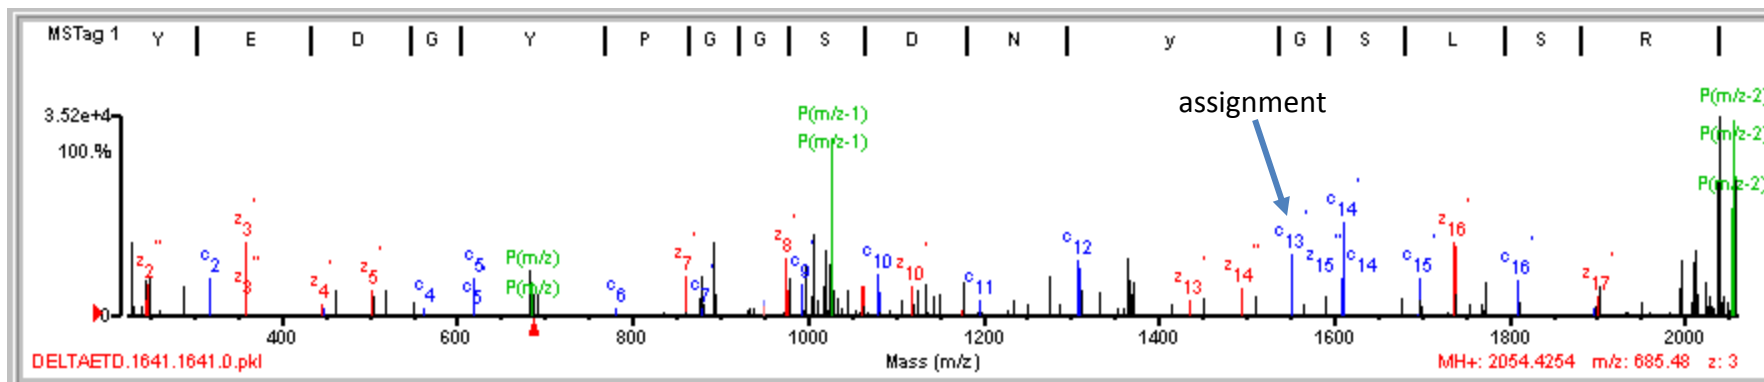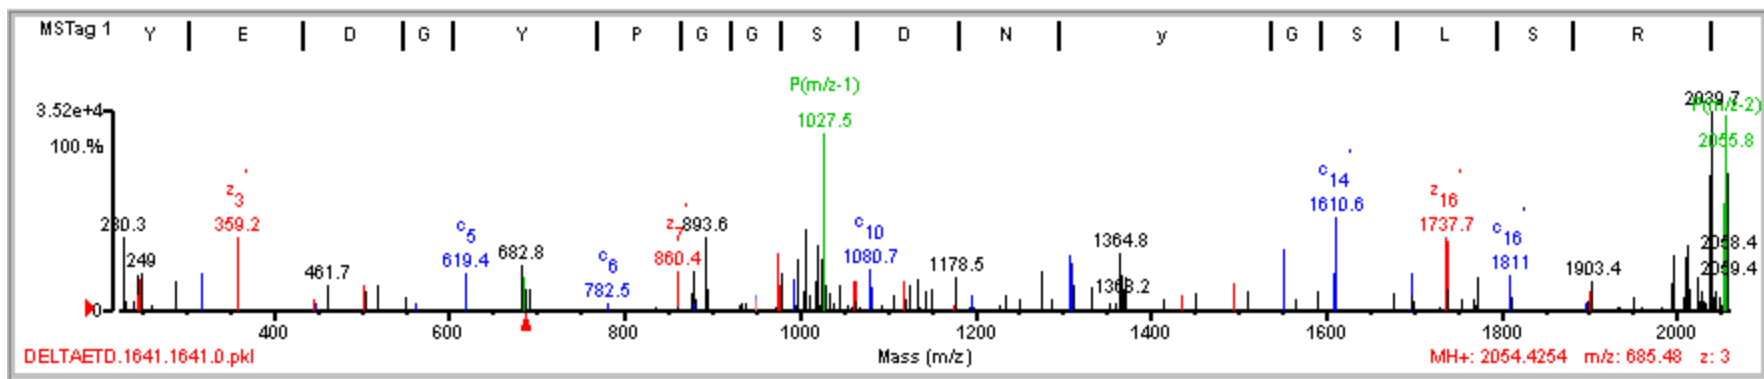

| Fragment-ion (m/z)     | 230.28 | 245.20 | 249.04 | 318.10         | 359.22         | 619.36         | 860.40         | 878.53 | 893.65 | 975.44         | 994.29          | 1062.57        | 1080.67         | 1119.63         | 1275.31 | 1309.33         | 1364.80 | 1366.46 | 1553.29         | 1609.62         | 1610.62         | 1697.79         | 1737.67         | 1811.0         |
|------------------------|--------|--------|--------|----------------|----------------|----------------|----------------|--------|--------|----------------|-----------------|----------------|-----------------|-----------------|---------|-----------------|---------|---------|-----------------|-----------------|-----------------|-----------------|-----------------|----------------|
| Frac. Inten.(% of TIC) | 5.94   | 3.14   | 3.04   | 2.32           | 5.48           | 2.74           | 2.77           | 2.45   | 5.90   | 5.04           | 2.33            | 3.83           | 4.52            | 2.54            | 2.47    | 6.28            | 4.10    | 3.11    | 3.77            | 2.36            | 5.59            | 4.58            | 9.97            | 3.0            |
| Rel. Inten.(% of BP)   | 59.62  | 31.48  | 30.48  | 23.30          | 54.84          | 27.52          | 27.75          | 24.56  | 59.21  | 50.56          | 23.39           | 38.44          | 45.36           | 25.44           | 24.77   | 62.84           | 41.11   | 31.15   | 37.80           | 23.66           | 56.06           | 45.92           | 100.00          | 30.5           |
| Score                  | -0.60  | -0.31  | -0.30  | 1.00           | 1.00           | 1.00           | 1.00           | -0.25  | -0.59  | 1.00           | 0.25            | 1.00           | 1.00            | 1.00            | -0.25   | 1.00            | -0.41   | -0.31   | 0.25            | 1.00            | 0.25            | 0.25            | 1.00            | 0.2            |
| Ion-type               |        |        |        | c <sub>2</sub> | z <sub>3</sub> | c <sub>5</sub> | z <sub>7</sub> |        |        | z <sub>8</sub> | c <sub>10</sub> | z <sub>9</sub> | c <sub>10</sub> | z <sub>10</sub> |         | c <sub>12</sub> |         |         | c <sub>13</sub> | c <sub>14</sub> | c <sub>14</sub> | c <sub>15</sub> | z <sub>16</sub> | c <sub>1</sub> |
| Delta Da               |        |        |        | -0.06          | 0.00           | 0.11           | 0.06           |        |        | 0.07           | -0.12           | 0.17           | 0.23            | 0.21            |         | -0.18           |         |         | -0.26           | 0.06            | 0.05            | 0.19            | 0.02            | 0.3            |





# Peak 13

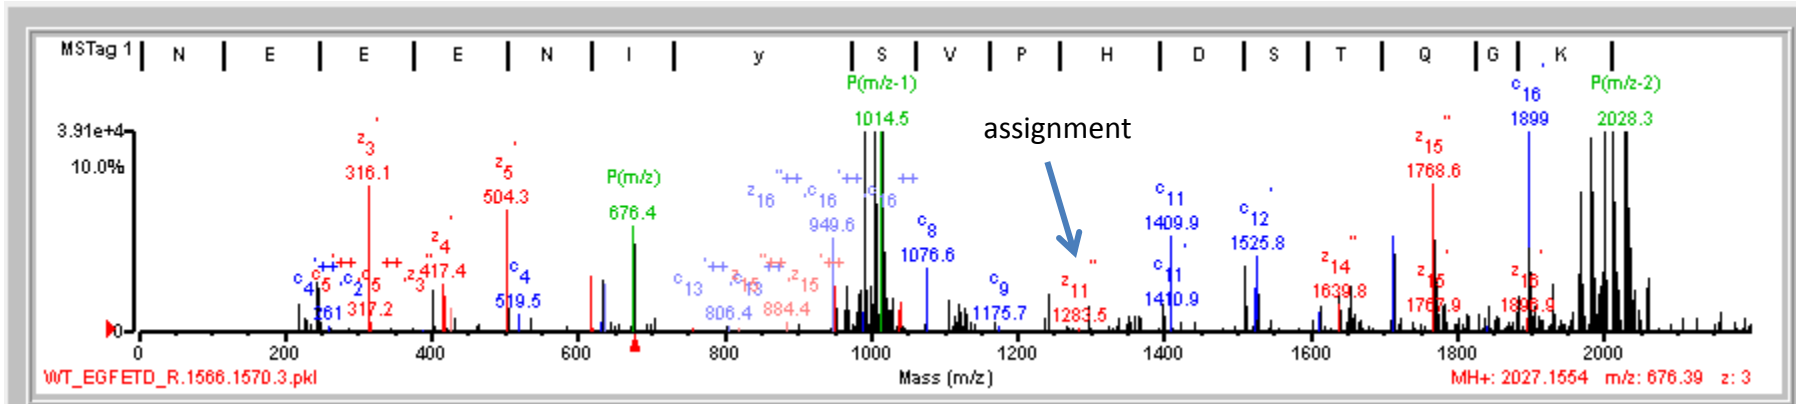

| Rank | Score | SPI (%) | BCS | # Unmatched Ions | Variable sites | Sequence                                 | MH <sup>+</sup> Calculated (Da) | MH <sup>+</sup> Error (Da) | MH <sup>+</sup> Error (ppm) | Protein MW/pl (Da) | Species        | Accession #               | MS-Digest Index #              | Protein Name                                 |        |                 |                |                 |                               |                 |                 |                 |                 |                 |                               |                               |                 |                               |         |         |
|------|-------|---------|-----|------------------|----------------|------------------------------------------|---------------------------------|----------------------------|-----------------------------|--------------------|----------------|---------------------------|--------------------------------|----------------------------------------------|--------|-----------------|----------------|-----------------|-------------------------------|-----------------|-----------------|-----------------|-----------------|-----------------|-------------------------------|-------------------------------|-----------------|-------------------------------|---------|---------|
| 1    | 12.80 | 83.4    | 11  | 4/24             | Y1105y         | (R)N/E/E/E/N I y/S/V P H/D/S/T/Q G/K (I) | 1946.87                         | 80.2828                    | 156.1                       | 170515.0/6.19      | Homo sapiens   | <a href="#">150417981</a> | <a href="#">7378</a>           | glucocorticoid receptor DNA binding factor 1 |        |                 |                |                 |                               |                 |                 |                 |                 |                 |                               |                               |                 |                               |         |         |
|      |       |         |     |                  |                | Fragment-ion (m/z)                       | 245.16                          | 316.13                     | 417.45                      | 504.32             | 619.34         | 635.51                    | 949.55                         | 952.46                                       | 992.07 | 1019.52         | 1039.59        | 1076.65         | 1409.86                       | 1511.30         | 1525.76         | 1612.32         | 1639.15         | 1654.83         | 1713.81                       | 1768.64                       | 1784.40         | 1898.06                       | 1899.03 | 1931.44 |
|      |       |         |     |                  |                | Frac. Inten. (% of TIC)                  | 3.72                            | 4.35                       | 2.40                        | 3.87               | 1.70           | 2.81                      | 4.25                           | 2.48                                         | 8.65   | 2.31            | 2.23           | 2.13            | 3.60                          | 2.84            | 2.82            | 1.73            | 2.83            | 3.17            | 7.05                          | 11.34                         | 1.69            | 6.32                          | 13.80   | 1.90    |
|      |       |         |     |                  |                | Rel. Inten. (% of BP)                    | 26.98                           | 31.49                      | 17.38                       | 28.03              | 12.32          | 20.38                     | 30.80                          | 18.00                                        | 62.67  | 16.71           | 16.16          | 15.42           | 26.10                         | 20.57           | 20.42           | 12.52           | 20.52           | 22.94           | 51.07                         | 82.19                         | 12.21           | 45.83                         | 100.00  | 13.80   |
|      |       |         |     |                  |                | Score                                    | -0.27                           | 1.00                       | 1.00                        | 1.00               | 0.25           | 1.00                      | 1.00                           | 1.00                                         | -0.63  | -0.17           | 1.00           | 1.00            | 0.25                          | 0.25            | 1.00            | 1.00            | 0.25            | 0.25            | 0.25                          | 0.25                          | 0.25            | 1.00                          | 0.25    | -0.14   |
|      |       |         |     |                  |                | Ion-type                                 |                                 | z <sub>3</sub>             | z <sub>4</sub>              | z <sub>5</sub>     | z <sub>6</sub> | y <sub>6</sub>            | c <sup>++</sup> <sub>16</sub>  |                                              |        | z <sub>10</sub> | c <sub>8</sub> | c <sub>11</sub> | z <sup>''</sup> <sub>13</sub> | c <sub>12</sub> | c <sub>13</sub> | z <sub>14</sub> | y <sub>14</sub> | c <sub>14</sub> | z <sup>''</sup> <sub>15</sub> | y <sub>15</sub>               | c <sub>16</sub> | c <sup>''</sup> <sub>16</sub> |         |         |
|      |       |         |     |                  |                | Delta Da                                 |                                 | -0.04                      | 0.23                        | 0.07               | 0.06           | 0.21                      | 0.17                           | -0.00                                        |        | 0.10            | 0.26           | 0.29            | 0.64                          | 0.15            | 0.69            | 0.46            | 0.12            | 0.12            | -0.10                         | 0.65                          | 0.30            | 0.26                          |         |         |
|      |       |         |     |                  |                |                                          |                                 |                            |                             |                    |                |                           | z <sup>+++</sup> <sub>16</sub> |                                              |        |                 |                |                 | y <sub>13</sub>               |                 |                 |                 |                 |                 |                               | z <sup>''</sup> <sub>16</sub> |                 |                               |         |         |

# Peak 14

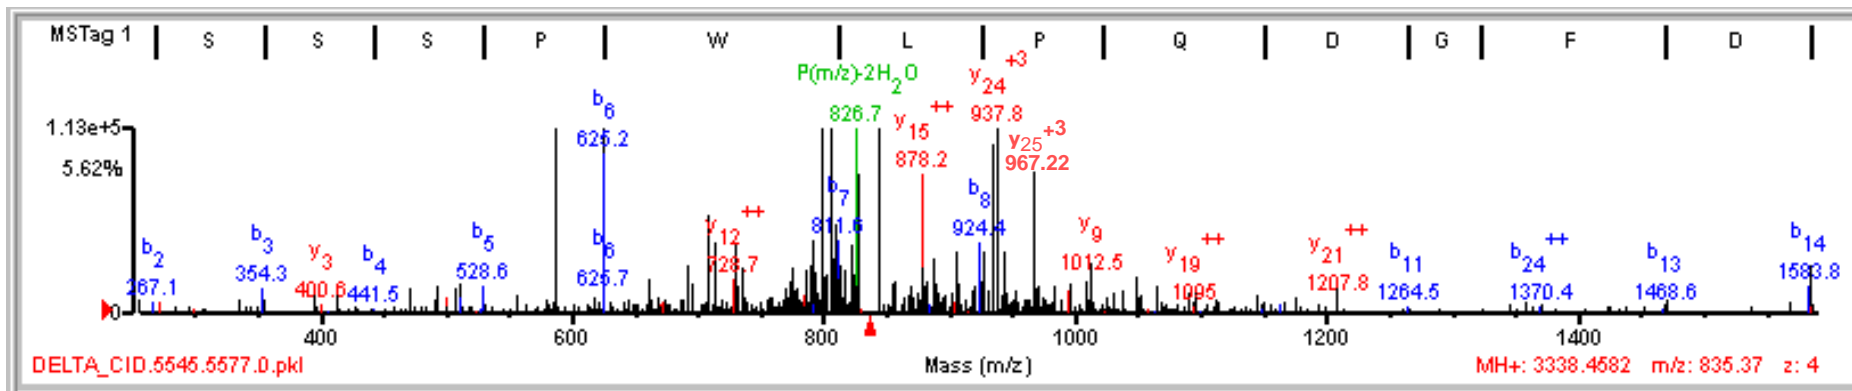

| Fragment-ion (m/z)      | 586.36 | 624.76         | 692.71             | 707.86 | 713.85                                         | 730.94             | 775.69 | 790.72 | 800.06 | 801.70 | 805.95             | 809.78 | 811.56         | 817.49 | 822.23 | 843.57             | 878.15             | 888.44 | 906.27                           | 924.44         | 935.88             | 937.75             | 943.89 | 967.22             | 1584.70 |
|-------------------------|--------|----------------|--------------------|--------|------------------------------------------------|--------------------|--------|--------|--------|--------|--------------------|--------|----------------|--------|--------|--------------------|--------------------|--------|----------------------------------|----------------|--------------------|--------------------|--------|--------------------|---------|
| Frac. Inten. (% of TIC) | 7.33   | 3.48           | 0.88               | 1.69   | 1.11                                           | 1.03               | 0.84   | 1.18   | 2.61   | 0.02   | 42.91              | 1.27   | 0.05           | 0.78   | 1.00   | 9.12               | 2.62               | 1.24   | 1.19                             | 1.22           | 1.47               | 13.64              | 0.76   | 2.08               | 0.74    |
| Rel. Inten. (% of BP)   | 17.08  | 8.06           | 1.58               | 3.94   | 2.58                                           | 2.40               | 1.98   | 2.76   | 6.07   | 0.05   | 100.00             | 2.96   | 0.12           | 1.78   | 2.33   | 21.26              | 6.10               | 2.88   | 2.78                             | 2.85           | 3.42               | 31.80              | 1.76   | 4.79               | 1.72    |
| Score                   | -0.17  | 1.00           | 1.00               | -0.04  | 0.25                                           | 1.00               | -0.02  | -0.03  | -0.06  |        | 1.00               | -0.03  | 1.50           | -0.02  | -0.02  | 1.00               | 1.00               | -0.03  | 0.50                             | 1.00           | 1.00               | 1.00               | -0.02  | 1.00               | -0.02   |
| Ion-type                |        | b <sub>2</sub> | y+++ <sub>13</sub> |        | b <sub>7</sub> -H <sub>3</sub> PO <sub>4</sub> | y+++ <sub>13</sub> |        |        |        | st     | y+++ <sub>21</sub> |        | b <sub>-</sub> |        |        | y+++ <sub>22</sub> | y+++ <sub>15</sub> |        | b <sub>2</sub> -H <sub>2</sub> O | b <sub>2</sub> | y+++ <sub>15</sub> | y+++ <sub>24</sub> |        | y+++ <sub>25</sub> |         |
| Delta Da                |        | -0.46          | 0.74               |        | 0.52                                           | 0.83               |        |        |        |        | 0.60               |        | 0.26           |        |        | 0.52               | 0.26               |        | -0.11                            | 0.05           | 0.47               | 0.33               |        | 0.79               |         |





# Peak 16

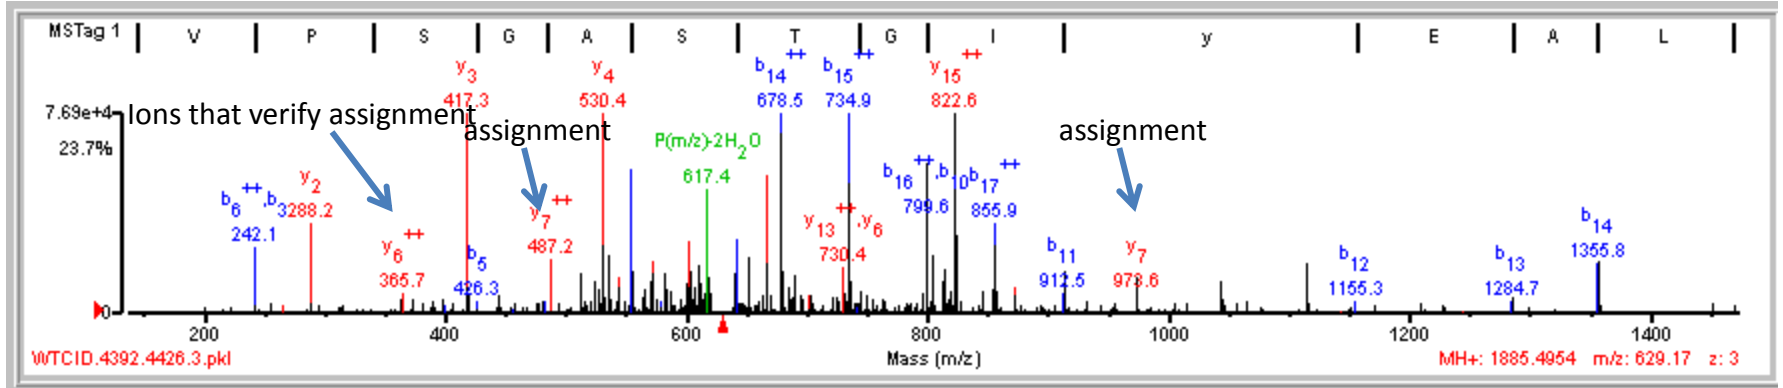

| Rank | Score | SPI (%) | BCS | # Unmatched Ions | Variable sites | Sequence                                    | MH <sup>+</sup> Calculated (Da) | MH <sup>+</sup> Error (Da) | MH <sup>+</sup> Error (ppm) | Protein MW/pi (Da) | Species      | Accession #               | MS-Digest Index #     | Protein Name |
|------|-------|---------|-----|------------------|----------------|---------------------------------------------|---------------------------------|----------------------------|-----------------------------|--------------------|--------------|---------------------------|-----------------------|--------------|
| 1    | 14.20 | 67.9    | 10  | 9/25             | Y44y           | (R) A A/V P S/G A S T/G I Y/E/A L/E/L R (D) | 1804.94                         | 80.5515                    | 310.3                       | 46932.0/7.58       | Homo sapiens | <a href="#">153267427</a> | <a href="#">4613</a>  | enolase 3    |
| 1    | 14.20 | 67.9    | 10  | 9/25             | Y44y           | (R) A A/V P S/G A S T/G I Y/E/A L/E/L R (D) | 1804.94                         | 80.5515                    | 310.3                       | 46932.0/7.58       | Homo sapiens | <a href="#">153267448</a> | <a href="#">7316</a>  | enolase 3    |
| 1    | 14.20 | 67.9    | 10  | 9/25             | Y44y           | (R) A A/V P S/G A S T/G I Y/E/A L/E/L R (D) | 1804.94                         | 80.5515                    | 310.3                       | 47169.2/7.01       | Homo sapiens | <a href="#">4503571</a>   | <a href="#">17636</a> | enolase 1    |
| 1    | 14.20 | 67.9    | 10  | 9/25             | Y44y           | (R) A A/V P S/G A S T/G I Y/E/A L/E/L R (D) | 1804.94                         | 80.5515                    | 310.3                       | 47268.8/4.91       | Homo sapiens | <a href="#">5803011</a>   | <a href="#">35485</a> | enolase 2    |

| Fragment-ion (m/z)      | 242.14         | 288.21         | 417.30         | 530.42         | 535.36                             | 544.03           | 554.30         | 572.18           | 601.52         | 610.15 | 618.76 | 642.74 | 666.41            | 678.47 | 730.42         | 734.93 | 799.61          | 800.07          | 804.50 | 814.28 | 822.57            | 855.92 | 872.05            | 1114.57 | 1355.76         |
|-------------------------|----------------|----------------|----------------|----------------|------------------------------------|------------------|----------------|------------------|----------------|--------|--------|--------|-------------------|--------|----------------|--------|-----------------|-----------------|--------|--------|-------------------|--------|-------------------|---------|-----------------|
| Frac. Inten. (% of TIC) | 1.35           | 2.03           | 8.13           | 7.19           | 1.31                               | 1.13             | 3.70           | 2.02             | 2.10           | 1.92   | 1.51   | 1.87   | 3.58              | 9.88   | 1.61           | 8.75   | 1.63            | 3.73            | 1.81   | 1.27   | 24.69             | 3.45   | 1.18              | 1.64    | 2.50            |
| Rel. Inten. (% of BP)   | 5.46           | 8.21           | 32.94          | 29.12          | 5.29                               | 4.59             | 14.99          | 8.19             | 8.51           | 7.77   | 6.10   | 7.56   | 14.49             | 40.02  | 6.51           | 35.44  | 6.59            | 15.12           | 7.33   | 5.16   | 100.00            | 13.98  | 4.79              | 6.65    | 10.14           |
| Score                   | 1.00           | 1.00           | 1.00           | 1.00           | 0.50                               | 1.00             | 1.00           | 1.00             | 1.00           | 1.00   | -0.08  | -0.06  | -0.08             | -0.40  | 1.00           | -0.35  | 1.00            | 1.00            | -0.07  | -0.05  | 1.00              | -0.14  | 1.00              | -0.07   | 1.00            |
| Ion-type                | b <sub>3</sub> | y <sub>2</sub> | y <sub>3</sub> | y <sub>4</sub> | y <sub>++8</sub> -H <sub>2</sub> O | y <sub>++8</sub> | b <sub>7</sub> | y <sub>++9</sub> | y <sub>5</sub> |        |        |        | y <sub>++11</sub> |        | y <sub>6</sub> |        | b <sub>10</sub> | b <sub>10</sub> |        |        | y <sub>++15</sub> |        | y <sub>++16</sub> |         | b <sub>14</sub> |
| Delta Da                | -0.01          | 0.01           | 0.05           | 0.09           | 0.60                               | 0.26             | 0.01           | -0.10            | 0.15           |        |        |        | 0.09              |        | 0.01           |        | 0.22            | 0.68            |        |        | 0.18              |        | 0.13              |         | 0.17            |

# Peak 17

Ions that verify assignment

assignment

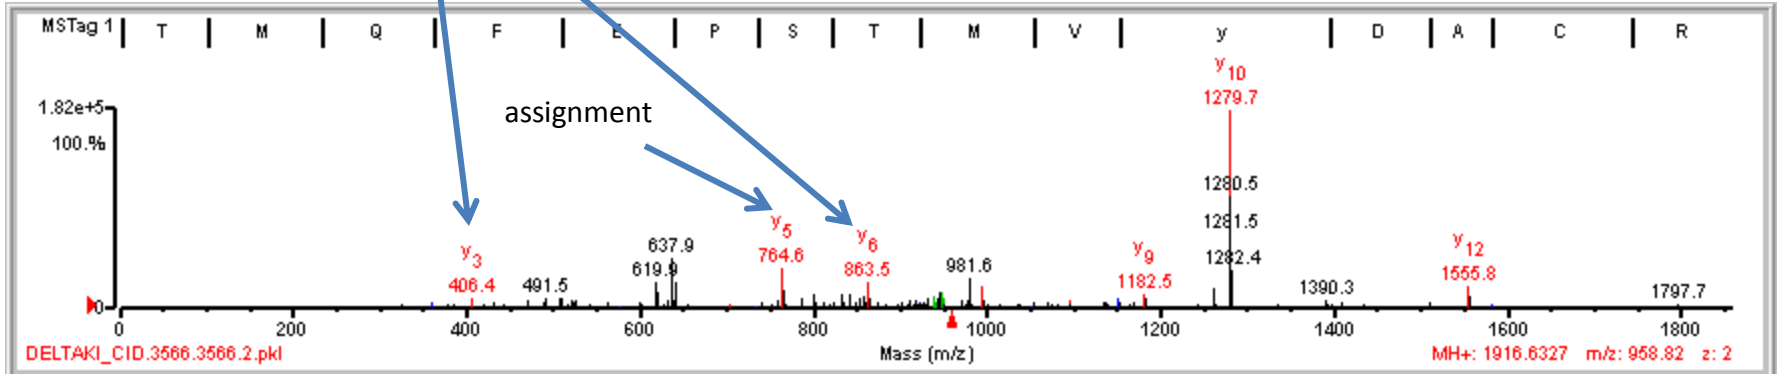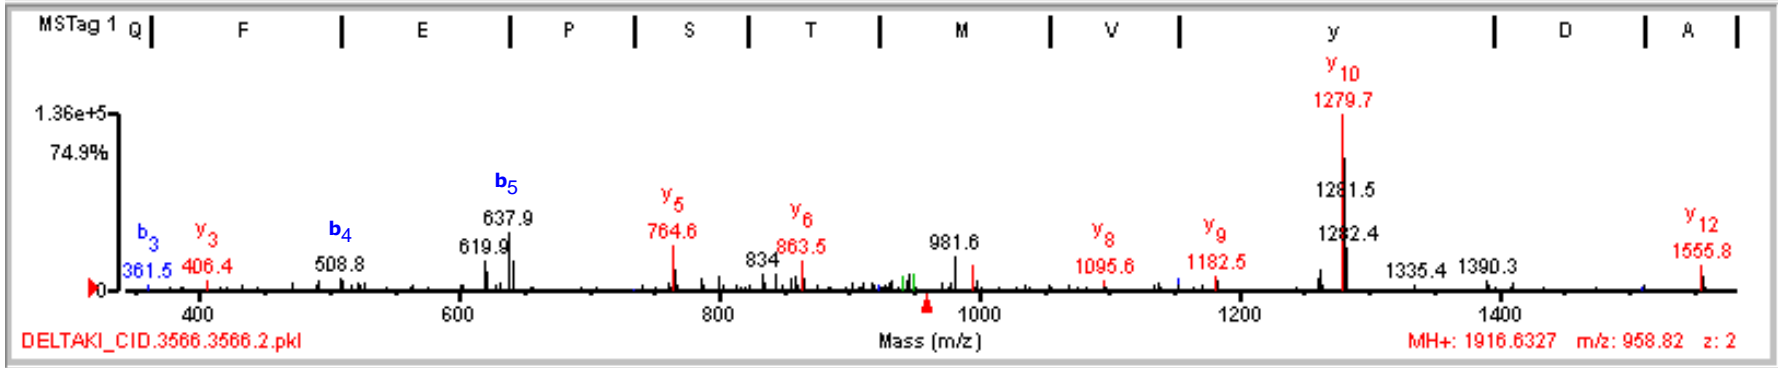

| Rank | Score | SPI (%) | BCS | # Unmatched Ions | Variable sites | Sequence                              | MH <sup>+</sup> Calculated (Da) | MH <sup>+</sup> Error (Da) | MH <sup>+</sup> Error (ppm) | Protein MW/pI (Da) | Species      | Accession #              | MS-Digest Index #    | Protein Name |
|------|-------|---------|-----|------------------|----------------|---------------------------------------|---------------------------------|----------------------------|-----------------------------|--------------------|--------------|--------------------------|----------------------|--------------|
| 1    | 15.31 | 92.3    | 9   | 3/21             | Y26y           | (K) T M/Q/F/E P/S T M/V y/D A C R (I) | 1835.78                         | 80.8566                    | 464.5                       | 269669.4/5.75      | Homo sapiens | <a href="#">16753233</a> | <a href="#">1400</a> | tal1n 1      |

| Fragment-ion (m/z)      | 490.61                          | 508.75         | 521.66         | 619.93                          | 637.90         | 640.91            | 764.61         | 786.39 | 833.96                              | 843.05            | 859.50 | 863.47         | 922.28         | 981.55 | 994.29         | 1152.57         | 1182.51        | 1262.56                          | 1279.69         | 1391.22                          | 1555.82         |
|-------------------------|---------------------------------|----------------|----------------|---------------------------------|----------------|-------------------|----------------|--------|-------------------------------------|-------------------|--------|----------------|----------------|--------|----------------|-----------------|----------------|----------------------------------|-----------------|----------------------------------|-----------------|
| Frac. Inten. (% of TIC) | 1.74                            | 2.45           | 2.10           | 4.77                            | 5.49           | 3.34              | 6.28           | 1.90   | 2.30                                | 2.47              | 2.18   | 4.32           | 1.52           | 3.63   | 2.26           | 1.77            | 2.62           | 2.61                             | 39.58           | 2.06                             | 4.62            |
| Rel. Inten. (% of BP)   | 4.40                            | 6.18           | 5.30           | 12.04                           | 13.87          | 8.45              | 15.86          | 4.80   | 5.80                                | 6.24              | 5.52   | 10.90          | 3.84           | 9.18   | 5.70           | 4.46            | 6.63           | 6.60                             | 100.00          | 5.22                             | 11.67           |
| Score                   | 0.50                            | 1.00           | 1.00           | 0.50                            | 1.00           | 1.00              | 1.00           | -0.05  | 0.50                                | 1.00              | -0.06  | 1.00           | 1.00           | -0.09  | 1.00           | 1.00            | 1.00           | 0.50                             | 1.00            | 0.50                             | 1.00            |
| Ion-type                | b <sub>4</sub> -NH <sub>3</sub> | b <sub>4</sub> | y <sub>4</sub> | b <sub>5</sub> -NH <sub>3</sub> | b <sub>5</sub> | y <sub>++10</sub> | y <sub>5</sub> |        | y <sub>++13</sub> -H <sub>2</sub> O | y <sub>++13</sub> |        | y <sub>6</sub> | b <sub>8</sub> |        | y <sub>7</sub> | b <sub>10</sub> | y <sub>9</sub> | y <sub>10</sub> -NH <sub>3</sub> | y <sub>10</sub> | y <sub>11</sub> -NH <sub>3</sub> | y <sub>12</sub> |
| Delta Da                | -0.59                           | 0.53           | 0.45           | -0.31                           | 0.63           | 0.66              | 0.37           |        | 0.63                                | 0.72              |        | 0.16           | -0.12          |        | -0.06          | 0.06            | 0.08           | 0.10                             | 0.21            | -0.28                            | 0.22            |

# Peak 18

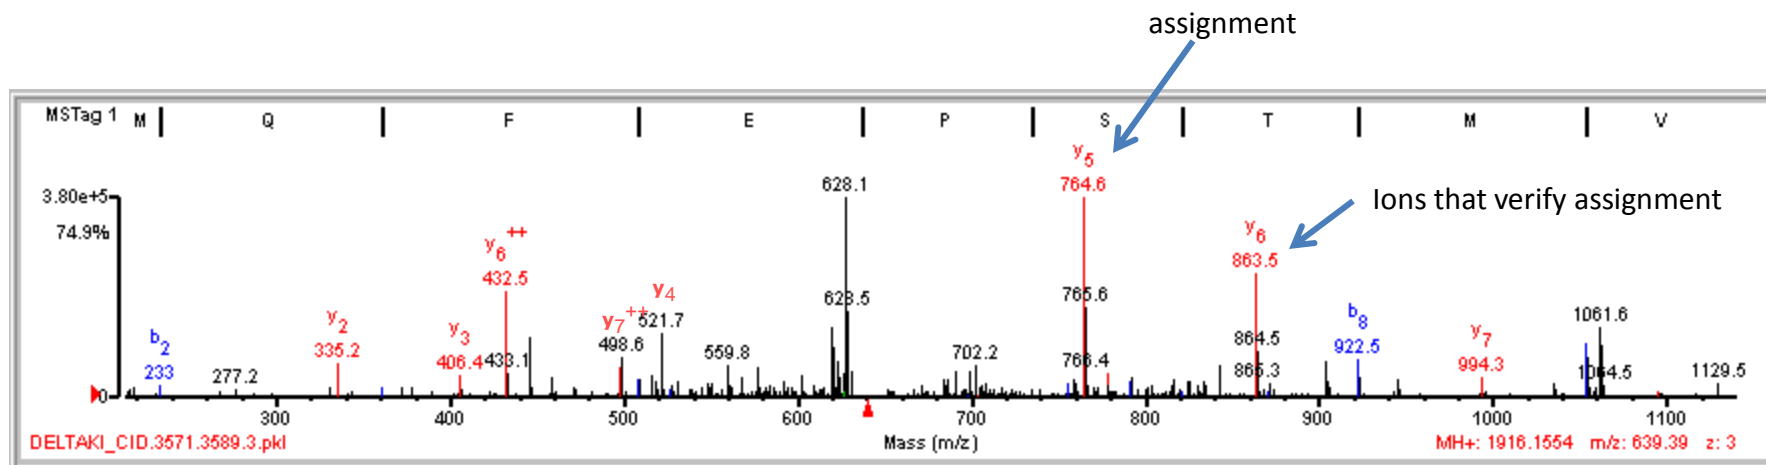

| Rank                    | Score            | SPI (%) | BCS              | # Unmatched Ions | Variable sites | Sequence                              | MH <sup>+</sup> Calculated (Da) | MH <sup>+</sup> Error (Da) | MH <sup>+</sup> Error (ppm) | Protein MW/pI (Da) | Species                         | Accession #              | MS-Digest Index #    | Protein Name |        |                |                   |                   |        |                   |                |                                  |                |                |         |
|-------------------------|------------------|---------|------------------|------------------|----------------|---------------------------------------|---------------------------------|----------------------------|-----------------------------|--------------------|---------------------------------|--------------------------|----------------------|--------------|--------|----------------|-------------------|-------------------|--------|-------------------|----------------|----------------------------------|----------------|----------------|---------|
| 1                       | 11.16            | 67.9    | 9                | 11/25            | Y26y           | (K) T M/Q/F\B P S/T M/V/y/D A\C R (I) | 1835.78                         | 80.3793                    | 215.5                       | 269669.4/5.75      | Homo sapiens                    | <a href="#">16753233</a> | <a href="#">1400</a> | taln 1       |        |                |                   |                   |        |                   |                |                                  |                |                |         |
| Fragment-ion (m/z)      | 432.50           | 446.67  | 498.07           | 508.61           | 518.71         | 521.74                                | 548.72                          | 559.85                     | 577.69                      | 602.61             | 619.87                          | 622.90                   | 699.25               | 702.18       | 759.56 | 764.65         | 778.60            | 791.71            | 824.77 | 842.86            | 863.50         | 904.47                           | 922.48         | 1053.36        | 1061.62 |
| Frac. Inten. (% of TIC) | 6.39             | 3.24    | 3.74             | 1.89             | 2.14           | 3.74                                  | 2.04                            | 3.04                       | 3.18                        | 2.05               | 6.19                            | 3.03                     | 2.20                 | 1.85         | 2.13   | 17.48          | 2.28              | 1.83              | 2.08   | 2.19              | 9.23           | 2.89                             | 2.94           | 5.06           | 7.16    |
| Rel. Inten. (% of BP)   | 36.53            | 18.50   | 21.39            | 10.81            | 12.26          | 21.37                                 | 11.66                           | 17.41                      | 18.20                       | 11.74              | 35.39                           | 17.32                    | 12.58                | 10.59        | 12.20  | 100.00         | 13.03             | 10.49             | 11.90  | 12.52             | 52.79          | 16.52                            | 16.84          | 28.95          | 40.97   |
| Score                   | 1.00             | -0.19   | 1.00             | 1.00             | -0.12          | 1.00                                  | 1.00                            | -0.17                      | -0.18                       | -0.12              | 0.50                            | -0.17                    | -0.13                | -0.11        | -0.12  | 1.00           | 1.00              | 1.00              | -0.12  | 1.00              | 1.00           | 0.50                             | 1.00           | 1.00           | -0.41   |
| Ion-type                | y <sup>++6</sup> |         | y <sup>++7</sup> | b <sub>4</sub>   |                | y <sub>4</sub>                        | y <sup>++8</sup>                |                            |                             |                    | b <sub>5</sub> -NH <sub>3</sub> |                          |                      |              |        | y <sub>5</sub> | y <sup>++12</sup> | b <sup>++13</sup> |        | y <sup>++13</sup> | y <sub>6</sub> | b <sub>8</sub> -H <sub>2</sub> O | b <sub>8</sub> | b <sub>9</sub> |         |
| Delta Da                | 0.34             |         | 0.39             | 0.39             |                | 0.53                                  | 0.52                            |                            |                             |                    | -0.37                           |                          |                      |              |        | 0.41           | 0.30              | 0.41              |        | 0.53              | 0.19           | 0.08                             | 0.08           | -0.08          |         |



# Peak 20

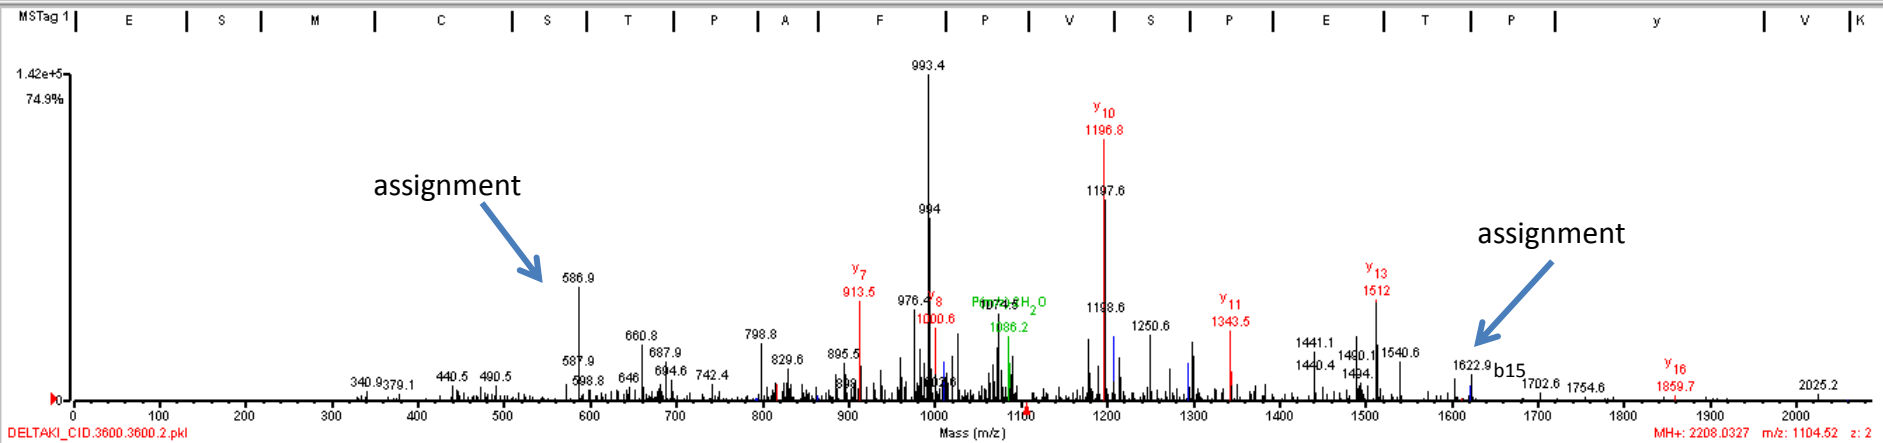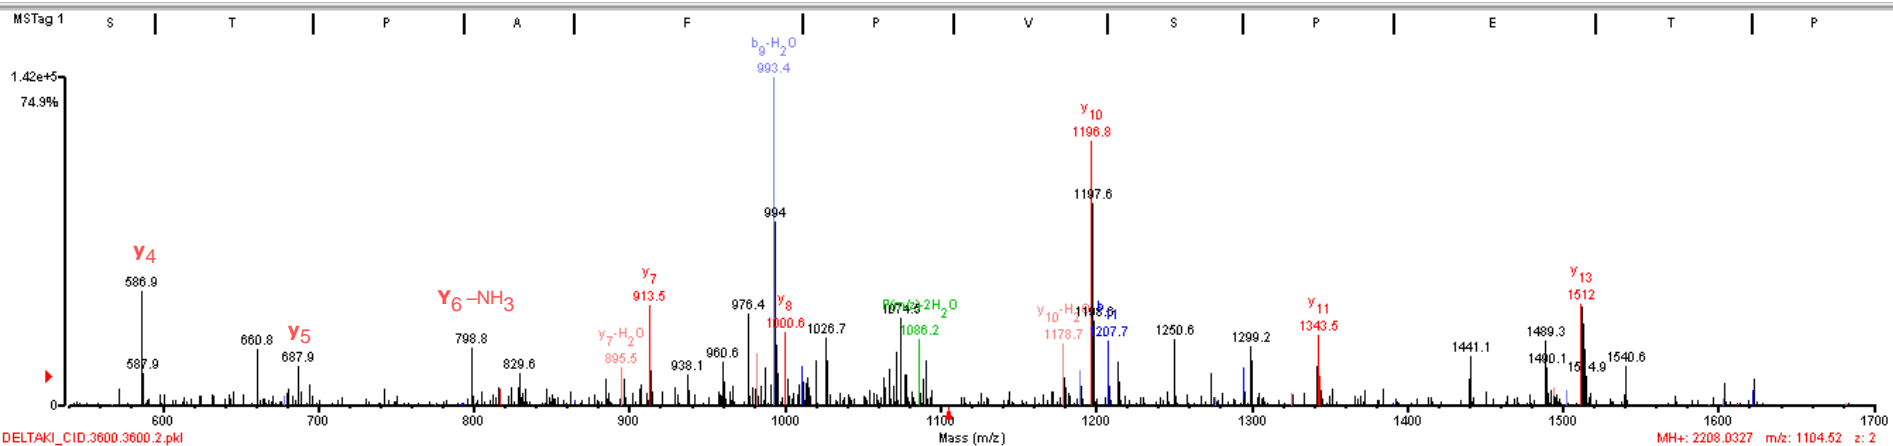

| 1                       | 9.67           | 65.9   | 6                               | 11/25                            | Y855y          | (K)    | E      | S                                | M              | C              | S       | T       | P       | A                                 | F                                 | P               | V               | S       | P       | E       | T       | P       | y       | V       | K       | (T) | 2126.98 | 81.0554 | 493.2 | 155266.4/6.34 | Homo sapiens | <a href="#">65288071</a> | <a href="#">34866</a> | tensin 3 |
|-------------------------|----------------|--------|---------------------------------|----------------------------------|----------------|--------|--------|----------------------------------|----------------|----------------|---------|---------|---------|-----------------------------------|-----------------------------------|-----------------|-----------------|---------|---------|---------|---------|---------|---------|---------|---------|-----|---------|---------|-------|---------------|--------------|--------------------------|-----------------------|----------|
| Fragment-ion (m/z)      | 586.88         | 660.75 | 798.85                          | 895.54                           | 913.49         | 960.63 | 976.37 | 993.37                           | 1000.65        | 1011.58        | 1026.70 | 1074.48 | 1077.45 | 1178.71                           | 1189.78                           | 1196.79         | 1207.70         | 1214.58 | 1250.55 | 1294.64 | 1299.24 | 1343.47 | 1489.34 | 1512.03 | 1512.78 |     |         |         |       |               |              |                          |                       |          |
| Frac. Inten. (% of TIC) | 3.92           | 2.02   | 1.77                            | 2.17                             | 3.96           | 2.03   | 3.05   | 18.67                            | 2.95           | 2.43           | 3.01    | 3.33    | 2.39    | 2.89                              | 1.72                              | 15.06           | 2.61            | 2.04    | 2.15    | 1.73    | 3.68    | 3.36    | 3.14    | 2.68    | 7.24    |     |         |         |       |               |              |                          |                       |          |
| Rel. Inten. (% of BP)   | 21.01          | 10.84  | 9.51                            | 11.62                            | 21.21          | 10.87  | 16.33  | 100.00                           | 15.78          | 13.02          | 16.11   | 17.85   | 12.80   | 15.50                             | 9.24                              | 80.69           | 13.96           | 10.92   | 11.50   | 9.28    | 19.70   | 18.01   | 16.80   | 14.33   | 38.81   |     |         |         |       |               |              |                          |                       |          |
| Score                   | 1.00           | -0.11  | 0.50                            | 0.50                             | 1.00           | -0.11  | -0.16  | 0.50                             | 1.00           | 1.00           | -0.16   | -0.18   | -0.13   | 0.50                              | 0.50                              | 1.00            | 1.00            | -0.11   | -0.12   | 1.00    | -0.20   | 1.00    | -0.17   | 1.00    | -0.39   |     |         |         |       |               |              |                          |                       |          |
| Ion-type                | y <sub>4</sub> |        | y <sub>6</sub> -NH <sub>3</sub> | y <sub>7</sub> -H <sub>2</sub> O | y <sub>7</sub> |        |        | b <sub>9</sub> -H <sub>2</sub> O | y <sub>8</sub> | b <sub>9</sub> |         |         |         | y <sub>10</sub> -H <sub>2</sub> O | b <sub>11</sub> -H <sub>2</sub> O | y <sub>10</sub> | b <sub>11</sub> |         |         |         |         |         |         |         |         |     |         |         |       |               |              |                          |                       |          |
| Delta Da                | 0.62           |        | -0.48                           | 0.14                             | 0.08           |        |        | -0.01                            | 0.21           | 0.19           |         |         |         | 0.16                              | 0.28                              | 0.23            | 0.19            |         |         | 0.10    |         |         |         |         | 0.31    |     |         |         |       |               |              |                          |                       |          |

# Peak 21

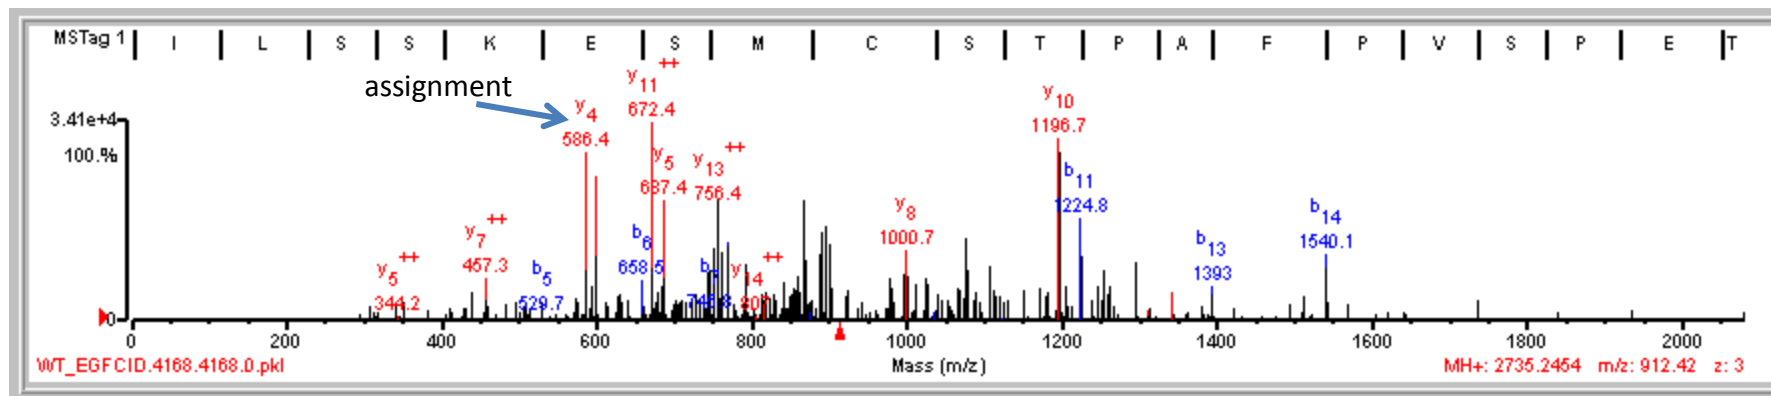

| 1                      | 14.97            | 82.6           | 8                 | 7/25              | Y855y          | (R) I L S S K E S M C S T P A F P V S P E T P y V K (T) | 2655.30           | 79.9410                             | -9.3              | 155266.4/6.34 | Homo sapiens | <a href="#">65288071</a>            | <a href="#">34866</a> | tensin 3 |        |                                  |                |                   |         |         |                 |                 |                   |                 |                 |
|------------------------|------------------|----------------|-------------------|-------------------|----------------|---------------------------------------------------------|-------------------|-------------------------------------|-------------------|---------------|--------------|-------------------------------------|-----------------------|----------|--------|----------------------------------|----------------|-------------------|---------|---------|-----------------|-----------------|-------------------|-----------------|-----------------|
| Fragment-ion (m/z)     | 457.28           | 586.45         | 598.93            | 672.45            | 687.45         | 752.85                                                  | 756.45            | 761.55                              | 770.42            | 814.44        | 855.39       | 859.64                              | 869.13                | 887.56   | 891.13 | 895.13                           | 1000.69        | 1025.67           | 1067.77 | 1076.32 | 1196.70         | 1224.84         | 1295.83           | 1393.01         | 1540.12         |
| Frac. Inten.(% of TIC) | 1.76             | 6.11           | 5.83              | 7.19              | 4.75           | 2.05                                                    | 8.40              | 2.33                                | 4.23              | 1.85          | 1.91         | 1.74                                | 5.92                  | 2.91     | 3.94   | 4.06                             | 3.49           | 1.88              | 1.77    | 2.93    | 11.33           | 5.22            | 1.77              | 1.85            | 4.76            |
| Rel. Inten.(% of BP)   | 15.51            | 53.89          | 51.49             | 63.46             | 41.93          | 18.11                                                   | 74.13             | 20.59                               | 37.32             | 16.29         | 16.90        | 15.38                               | 52.23                 | 25.71    | 34.74  | 35.80                            | 30.78          | 16.59             | 15.62   | 25.90   | 100.00          | 46.10           | 15.66             | 16.31           | 42.03           |
| Score                  | 1.00             | 1.00           | 1.00              | 1.00              | 1.00           | -0.18                                                   | 1.00              | 0.50                                | 1.00              | -0.16         | -0.17        | 0.50                                | 1.00                  | -0.26    | -0.35  | 0.50                             | 1.00           | 1.00              | -0.16   | -0.26   | 1.00            | 1.00            | 1.00              | 1.00            | 1.00            |
| Ion-type               | y <sup>++7</sup> | y <sub>4</sub> | y <sup>++10</sup> | y <sup>++11</sup> | y <sub>5</sub> |                                                         | y <sup>++13</sup> | b <sup>++14</sup> -H <sub>2</sub> O | b <sup>++14</sup> |               |              | b <sup>++16</sup> -H <sub>2</sub> O | b <sup>++16</sup>     |          |        | y <sub>7</sub> -H <sub>2</sub> O | y <sub>8</sub> | b <sup>++19</sup> |         |         | a <sub>11</sub> | b <sub>11</sub> | b <sup>++23</sup> | b <sub>13</sub> | b <sub>14</sub> |
| Delta Da               | 0.07             | 0.19           | 0.15              | 0.13              | 0.14           |                                                         | 0.09              | 0.19                                | 0.06              |               |              | 0.22                                | 0.71                  |          |        | -0.27                            | 0.25           | 0.68              |         |         | 0.14            | 0.28            | 0.74              | 0.36            | 0.40            |

# Peak 22

Ions that verify assignment

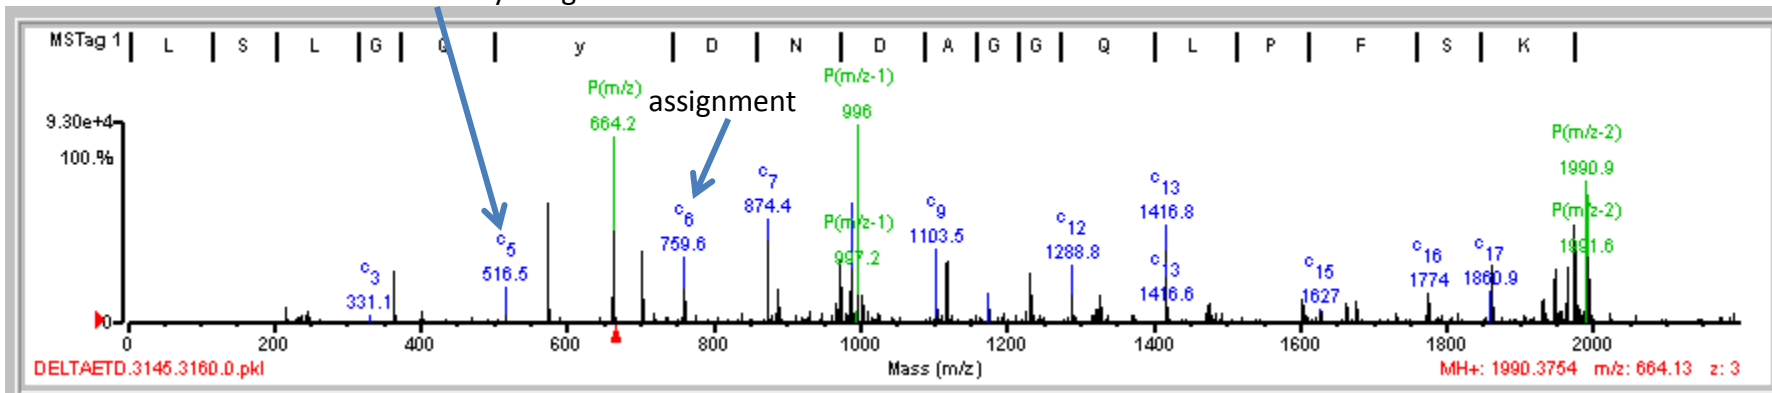

Ions that verify assignment

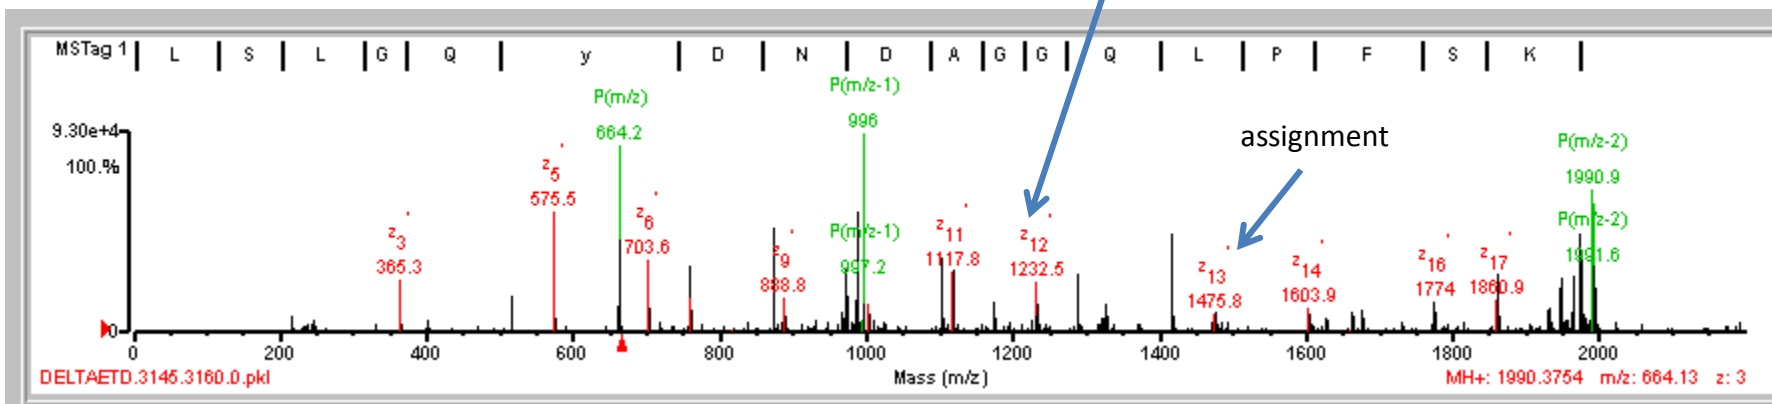

| 1                       | 16.65          | 91.5           | 15             | 3/22           | Y780y          | (K)            | L/S/L/G/Q/Y    | D/N/D/A | G/G/Q/L         | P/F/S/K        | (C)             | 1909.93         | 80.4464         | 241.2           | 155266.4/6.34   | Homo sapiens    | <a href="#">65288071</a> | <a href="#">34866</a> | tensin 3 |                 |                 |         |
|-------------------------|----------------|----------------|----------------|----------------|----------------|----------------|----------------|---------|-----------------|----------------|-----------------|-----------------|-----------------|-----------------|-----------------|-----------------|--------------------------|-----------------------|----------|-----------------|-----------------|---------|
| Fragment-ion (m/z)      | 365.27         | 516.46         | 575.48         | 703.65         | 759.63         | 874.37         | 888.84         | 973.49  | 1003.81         | 1103.51        | 1117.75         | 1232.50         | 1288.75         | 1416.82         | 1475.82         | 1603.94         | 1661.87                  | 1774.02               | 1776.02  | 1860.87         | 1862.46         | 1864.43 |
| Frac. Inten. (% of TIC) | 2.81           | 2.25           | 8.22           | 4.90           | 6.77           | 8.74           | 2.58           | 2.95    | 2.92            | 3.65           | 6.96            | 7.64            | 6.43            | 9.93            | 2.32            | 2.99            | 1.97                     | 3.74                  | 3.41     | 2.90            | 3.80            | 2.10    |
| Rel. Inten. (% of BP)   | 28.31          | 22.66          | 82.78          | 49.37          | 68.14          | 88.02          | 26.01          | 29.74   | 29.38           | 36.74          | 70.08           | 76.93           | 64.75           | 100.00          | 23.40           | 30.14           | 19.79                    | 37.62                 | 34.32    | 29.21           | 38.27           | 21.19   |
| Score                   | 1.00           | 1.00           | 1.00           | 1.00           | 1.00           | 1.00           | 1.00           | -0.30   | 1.00            | 1.00           | 1.00            | 1.00            | 1.00            | 1.00            | 1.00            | 1.00            | 0.25                     | 1.00                  | -0.34    | 1.00            | 0.25            | -0.21   |
| Ion-type                | z <sub>3</sub> | c <sub>5</sub> | z <sub>5</sub> | z <sub>6</sub> | c <sub>6</sub> | c <sub>7</sub> | z <sub>9</sub> |         | z <sub>10</sub> | c <sub>9</sub> | z <sub>11</sub> | c <sub>11</sub> | c <sub>12</sub> | c <sub>13</sub> | z <sub>13</sub> | z <sub>14</sub> | z <sub>15</sub>          | c <sub>16</sub>       |          | c <sub>17</sub> | c <sub>17</sub> |         |
| Delta Da                | 0.08           | 0.15           | 0.15           | 0.26           | 0.29           | -0.00          | 0.37           |         | 0.31            | 0.07           | 0.21            | -0.01           | 0.23            | 0.24            | 0.22            | 0.28            | 0.19                     | 0.24                  |          | 0.05            | 0.64            |         |
|                         |                |                |                |                |                |                |                |         |                 |                |                 |                 |                 |                 |                 |                 |                          | 0.26                  |          | 0.08            | 0.66            |         |

# Peak 23

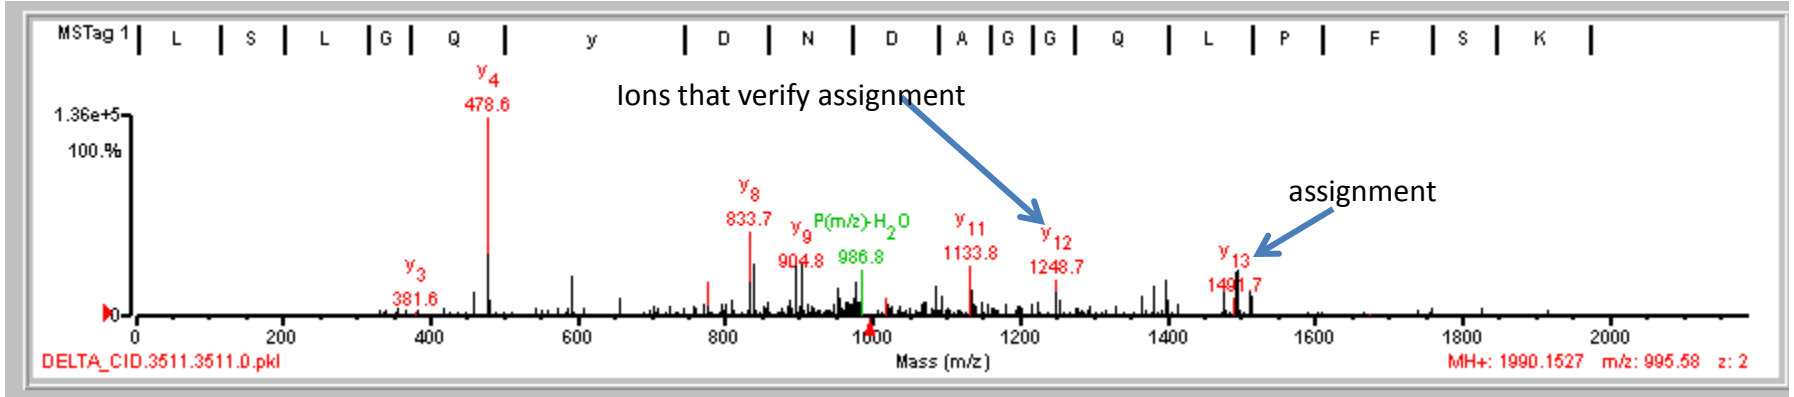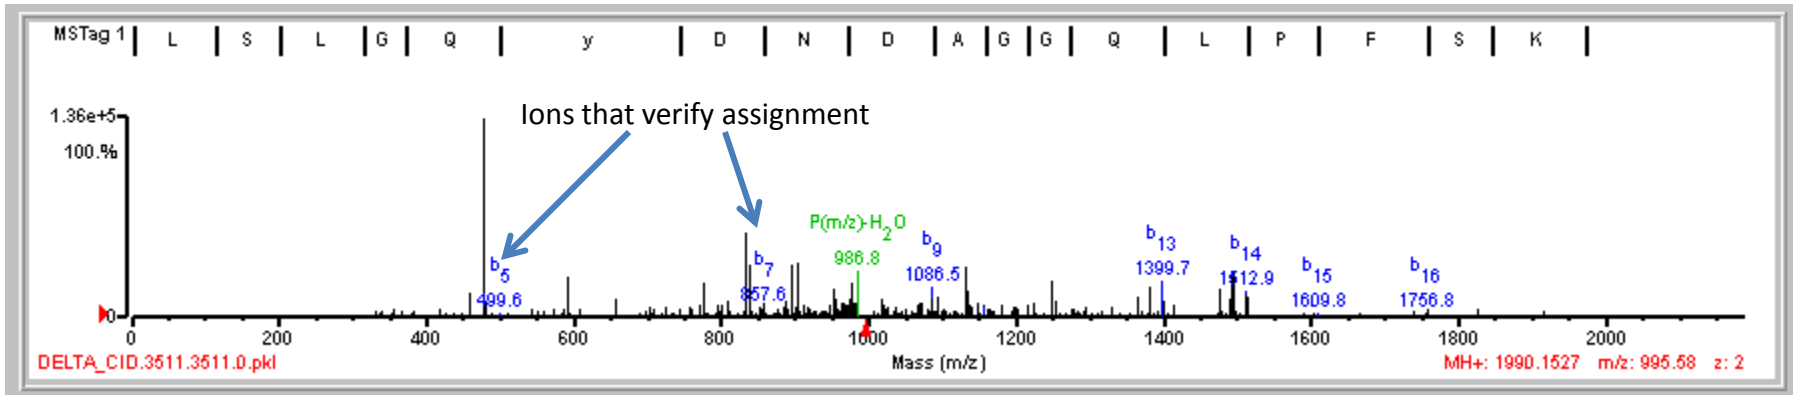

1 16.84 88.8 11 5/25 Y780y (K) L S/L/G Q/y/D/N/D/A/G/G Q L P F S K (C) 1909.93 80.2237 129.3 155266.4/6.34 Homo sapiens [65288071](#) [34866](#) tensin 3

| Fragment-ion (m/z)     | 460.54                          | 478.64         | 591.91         | 776.78         | 833.70         | 839.13                           | 857.55         | 895.55            | 904.77         | 953.35                           | 956.61 | 968.95 | 979.15 | 982.03 | 1019.39         | 1086.52        | 1133.78         | 1248.72         | 1382.85                          | 1399.69         | 1477.93 | 1491.74         | 1494.75                           | 1495.85                          | 1512.90         |
|------------------------|---------------------------------|----------------|----------------|----------------|----------------|----------------------------------|----------------|-------------------|----------------|----------------------------------|--------|--------|--------|--------|-----------------|----------------|-----------------|-----------------|----------------------------------|-----------------|---------|-----------------|-----------------------------------|----------------------------------|-----------------|
| Frac. Inten.(% of TIC) | 1.82                            | 17.07          | 2.95           | 3.06           | 7.30           | 4.23                             | 2.03           | 5.67              | 6.59           | 1.95                             | 2.48   | 1.85   | 2.09   | 1.83   | 2.63            | 3.38           | 5.15            | 4.21            | 2.24                             | 3.44            | 2.98    | 2.18            | 2.66                              | 5.75                             | 4.48            |
| Rel. Inten.(% of BP)   | 10.65                           | 100.00         | 17.27          | 17.92          | 42.75          | 24.76                            | 11.88          | 33.23             | 38.60          | 11.45                            | 14.52  | 10.82  | 12.22  | 10.73  | 15.38           | 19.79          | 30.16           | 24.69           | 13.14                            | 20.19           | 17.48   | 12.77           | 15.58                             | 33.71                            | 26.25           |
| Score                  | 0.50                            | 1.00           | 1.00           | 1.00           | 1.00           | 1.00                             | 1.00           | 1.00              | 1.00           | 0.50                             | -0.15  | -0.11  | -0.12  | -0.11  | 1.00            | 1.00           | 1.00            | 1.00            | 0.50                             | 1.00            | -0.17   | 1.00            | 0.50                              | 0.50                             | 1.00            |
| Ion-type               | y <sub>2</sub> -NH <sub>3</sub> | y <sub>4</sub> | y <sub>5</sub> | y <sub>7</sub> | y <sub>8</sub> | b <sub>7</sub> -H <sub>2</sub> O | b <sub>7</sub> | y <sub>++1e</sub> | y <sub>8</sub> | b <sub>8</sub> -H <sub>2</sub> O |        |        |        |        | y <sub>10</sub> | b <sub>9</sub> | y <sub>11</sub> | y <sub>12</sub> | b <sub>13</sub> -NH <sub>3</sub> | b <sub>13</sub> |         | y <sub>13</sub> | b <sub>14</sub> -H <sub>2</sub> O | b <sub>14</sub> -NH <sub>3</sub> | b <sub>14</sub> |
| Delta Da               | -0.70                           | 0.37           | 0.56           | 0.35           | 0.25           | -0.20                            | 0.21           | 0.16              | 0.28           | -0.03                            |        |        |        |        | -0.13           | 0.11           | 0.22            | 0.13            | 0.32                             | 0.14            |         | 0.12            | 0.12                              | 0.24                             | 0.26            |



# Peak 24

Ions that verify assignment

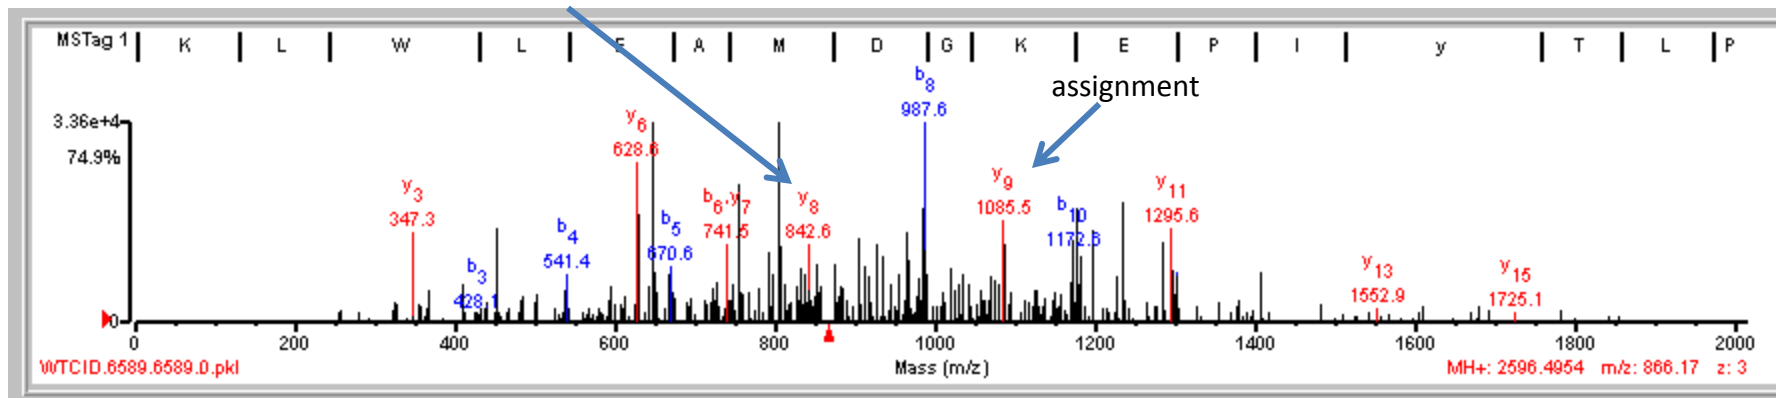

1 17.97 88.2 12 5/24 Y376y (R) K/L/W/L E/A I M D I G K E P I y T L I P A I I S K (K) 2516.38 80.1122 56.2 92466.6/8.34 Homo sapiens [169203583](#) [18234](#) PREDICTED: similar to mCG142052 isoform 2

| Fragment-ion (m/z)     | 347.28         | 454.16 | 628.61         | 648.46                        | 741.46         | 756.49                        | 805.79                        | 833.95 | 836.73 | 842.61         | 905.11 | 912.01 | 928.39                        | 964.61                        | 985.01                        | 987.61         | 1085.54        | 1172.57         | 1178.67                       | 1197.52 | 1235.14                       | 1284.81                          | 1295.63         | 1301.82         |
|------------------------|----------------|--------|----------------|-------------------------------|----------------|-------------------------------|-------------------------------|--------|--------|----------------|--------|--------|-------------------------------|-------------------------------|-------------------------------|----------------|----------------|-----------------|-------------------------------|---------|-------------------------------|----------------------------------|-----------------|-----------------|
| Frac. Inten.(% of TIC) | 2.35           | 2.54   | 7.20           | 11.41                         | 2.12           | 4.54                          | 10.28                         | 0.06   | 2.81   | 3.55           | 2.03   | 2.12   | 1.94                          | 3.72                          | 2.78                          | 8.97           | 4.88           | 4.91            | 4.51                          | 2.29    | 4.93                          | 2.98                             | 3.99            | 3.09            |
| Rel. Inten.(% of BP)   | 20.57          | 22.29  | 63.12          | 100.00                        | 18.60          | 39.77                         | 90.12                         | 0.53   | 24.63  | 31.14          | 17.77  | 18.59  | 17.04                         | 32.58                         | 24.34                         | 78.64          | 42.76          | 42.99           | 39.56                         | 20.09   | 43.21                         | 26.13                            | 34.93           | 27.11           |
| Score                  | 1.00           | -0.22  | 1.00           | 1.00                          | 1.00           | 1.00                          | 1.00                          | 1.50   | -0.25  | 1.00           | -0.18  | -0.19  | 1.00                          | 1.00                          | 1.00                          | 1.00           | 1.00           | 1.00            | 1.00                          | -0.20   | 1.00                          | 0.50                             | 1.00            | 1.00            |
| Ion-type               | y <sub>3</sub> |        | y <sub>6</sub> | y <sup>++</sup> <sub>11</sub> | b <sub>6</sub> | b <sup>++</sup> <sub>13</sub> | y <sup>++</sup> <sub>14</sub> | sty    |        | y <sub>8</sub> |        |        | b <sup>++</sup> <sub>15</sub> | y <sup>++</sup> <sub>17</sub> | b <sup>++</sup> <sub>18</sub> | b <sub>8</sub> | y <sub>9</sub> | b <sub>10</sub> | y <sup>++</sup> <sub>20</sub> |         | y <sup>++</sup> <sub>21</sub> | b <sub>11</sub> -NH <sub>3</sub> | y <sub>11</sub> | b <sub>11</sub> |
| Delta Da               | 0.05           |        | 0.21           | 0.11                          | 0.03           | 0.09                          | 0.36                          | 0.49   |        | 0.08           |        |        | -0.05                         | 0.62                          | 0.03                          | 0.11           | -0.02          | -0.04           | 0.58                          |         | 0.51                          | 0.18                             | -0.07           | 0.16            |



# Peak 26

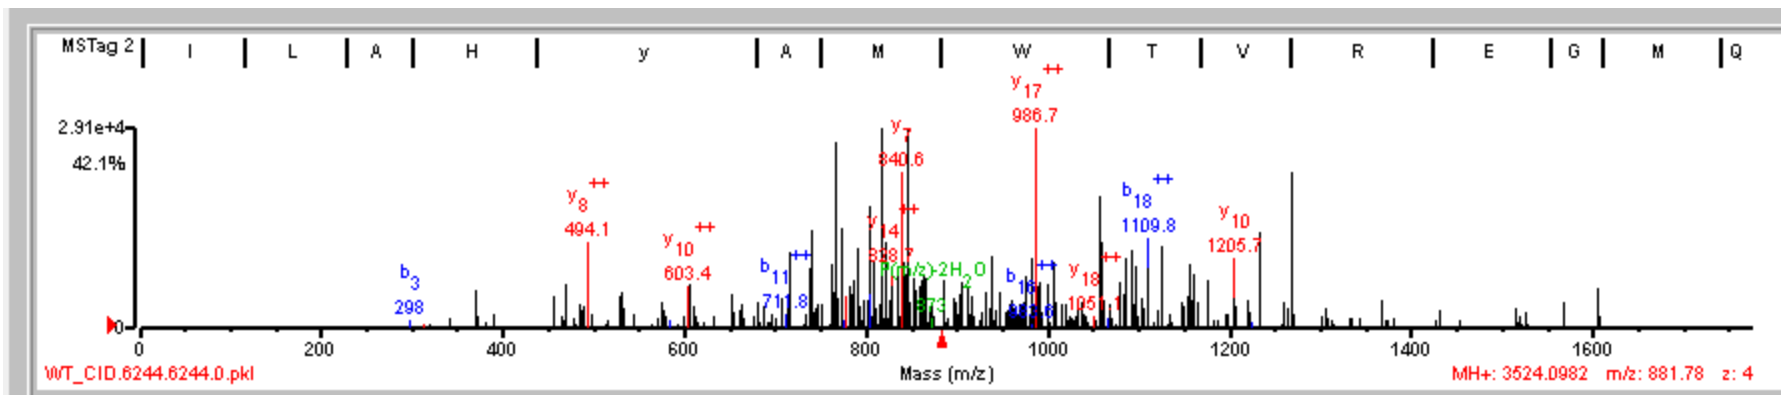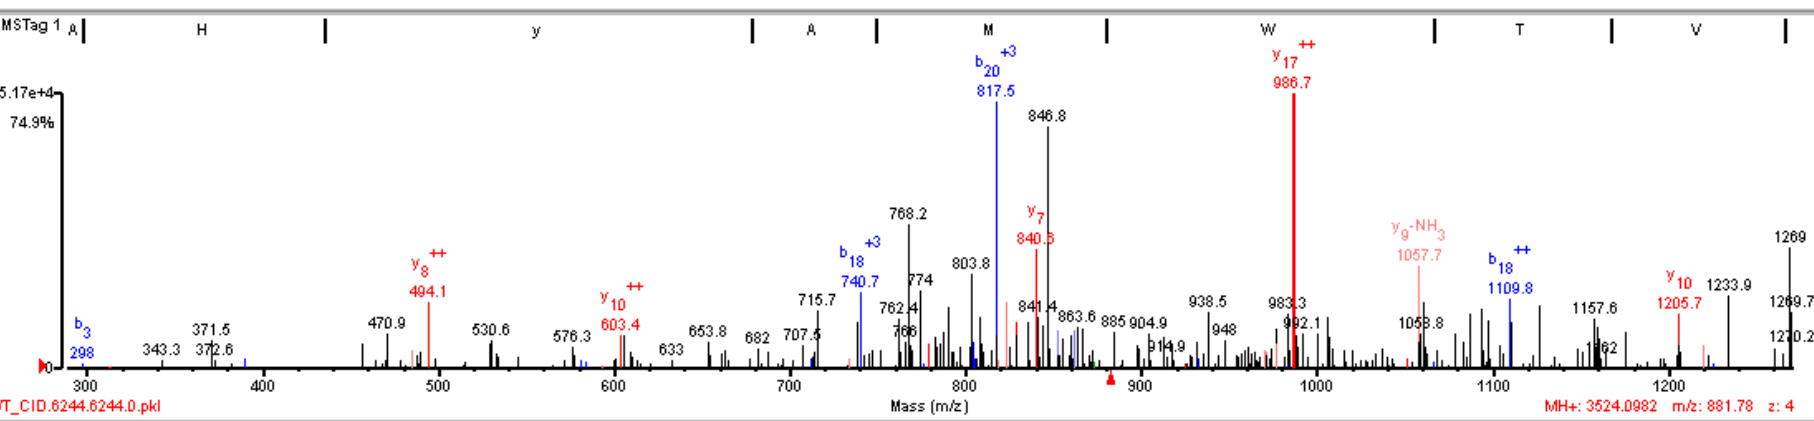

1 12.77 76.2 8 8/23 T201t Y188y (K) I L A H y A M W T V R E / G M Q / V A t (V | M | S) | F / L T N P M H \ K (I) 3362.67 161.4313 425.2 111896.7/9.58 Homo sapiens [169215032](#) [8292](#) PREDICTED: similar to hCG40021

| Fragment-ion (m/z)      | 494.14                       | 740.69                         | 768.24 | 774.02                         | 782.84 | 790.60 | 803.78 | 808.42 | 817.46                         | 823.21                                       | 828.67                        | 840.61                      | 846.79                         | 986.68                        | 1006.44 | 1057.71                         | 1060.71 | 1093.48 | 1109.75                        | 1126.40                        | 1160.20                        | 1205.74         | 1269.01                        |
|-------------------------|------------------------------|--------------------------------|--------|--------------------------------|--------|--------|--------|--------|--------------------------------|----------------------------------------------|-------------------------------|-----------------------------|--------------------------------|-------------------------------|---------|---------------------------------|---------|---------|--------------------------------|--------------------------------|--------------------------------|-----------------|--------------------------------|
| Frac. Inten. (% of TIC) | 2.46                         | 2.05                           | 5.03   | 3.23                           | 2.19   | 2.17   | 3.82   | 2.53   | 8.74                           | 2.05                                         | 2.14                          | 4.96                        | 9.25                           | 19.34                         | 2.90    | 4.50                            | 2.78    | 2.40    | 3.14                           | 3.38                           | 2.47                           | 2.70            | 5.77                           |
| Rel. Inten. (% of BP)   | 12.71                        | 10.62                          | 26.00  | 16.71                          | 11.31  | 11.22  | 19.76  | 13.06  | 45.19                          | 10.59                                        | 11.04                         | 25.64                       | 47.84                          | 100.00                        | 14.97   | 23.28                           | 14.39   | 12.41   | 16.23                          | 17.50                          | 12.79                          | 13.94           | 29.82                          |
| Score                   | 1.00                         | 1.00                           | -0.26  | 1.00                           | -0.11  | -0.11  | -0.20  | -0.13  | 1.00                           | 0.50                                         | 1.00                          | 1.00                        | 1.00                           | 1.00                          | -0.15   | 0.50                            | -0.14   | -0.12   | 1.00                           | 1.00                           | 1.00                           | 1.00            | 1.00                           |
| Ion-type                | y <sup>++</sup> <sub>8</sub> | b <sup>+++</sup> <sub>18</sub> |        | b <sup>+++</sup> <sub>19</sub> |        |        |        |        | b <sup>+++</sup> <sub>20</sub> | y <sup>-</sup> <sub>7</sub> -NH <sub>3</sub> | y <sup>++</sup> <sub>14</sub> | y <sup>-</sup> <sub>7</sub> | b <sup>+++</sup> <sub>21</sub> | y <sup>++</sup> <sub>17</sub> |         | y <sup>9</sup> -NH <sub>3</sub> |         |         | b <sup>+++</sup> <sub>18</sub> | b <sup>+++</sup> <sub>28</sub> | b <sup>+++</sup> <sub>19</sub> | y <sub>10</sub> | b <sup>+++</sup> <sub>21</sub> |
| Delta Da                | -0.12                        | 0.37                           |        | 0.67                           |        |        |        |        | 0.43                           | -0.20                                        | 0.28                          | 0.17                        | 0.75                           | 0.23                          |         | 0.20                            |         |         | -0.23                          | 0.23                           | 0.68                           | 0.16            | 0.46                           |

# Peak 27

Ions that verify assignment

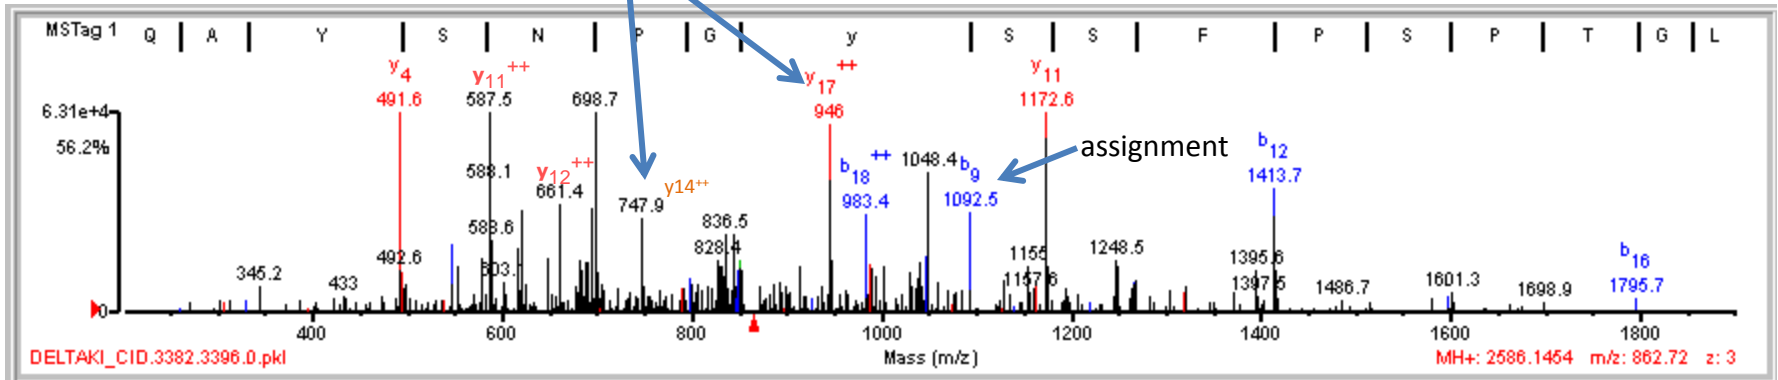

| 1                      | 15.44          | 88.5                          | 8                             | 5/23   | Y34y           | (R)M Q A Y/S N P G Y S S/F P S/P T G L E P S C K (S) |        |        |                |                                |                               |        |        |                               |                               | 2505.11        | 81.0394                                         | 414.9                         | 40514.3/5.33   | Homo sapiens                     | <a href="#">62865649</a> | <a href="#">27437</a>             | riffylin        |
|------------------------|----------------|-------------------------------|-------------------------------|--------|----------------|------------------------------------------------------|--------|--------|----------------|--------------------------------|-------------------------------|--------|--------|-------------------------------|-------------------------------|----------------|-------------------------------------------------|-------------------------------|----------------|----------------------------------|--------------------------|-----------------------------------|-----------------|
| Fragment-ion (m/z)     | 491.59         | 547.12                        | 587.48                        | 616.38 | 620.81         | 660.93                                               | 682.99 | 688.92 | 695.81         | 698.72                         | 747.88                        | 828.44 | 845.08 | 945.99                        | 983.42                        | 988.56         | 1038.95                                         | 1048.40                       | 1092.48        | 1155.02                          | 1172.63                  | 1248.49                           | 1413.68         |
| Frac. Inten.(% of TIC) | 7.23           | 2.10                          | 10.82                         | 2.64   | 2.46           | 5.55                                                 | 1.94   | 2.38   | 2.60           | 10.52                          | 3.13                          | 2.11   | 2.45   | 7.86                          | 2.77                          | 2.28           | 2.31                                            | 4.48                          | 2.80           | 1.84                             | 10.87                    | 2.46                              | 6.39            |
| Rel. Inten.(% of BP)   | 66.45          | 19.34                         | 99.52                         | 24.28  | 22.59          | 51.01                                                | 17.83  | 21.87  | 23.87          | 96.77                          | 28.83                         | 19.41  | 22.50  | 72.29                         | 25.49                         | 21.00          | 21.27                                           | 41.24                         | 25.77          | 16.89                            | 100.00                   | 22.66                             | 58.79           |
| Score                  | 1.00           | 1.00                          | 1.00                          | -0.24  | 1.00           | 1.00                                                 | -0.18  | -0.22  | 1.00           | 1.00                           | 1.00                          | -0.19  | -0.22  | 1.00                          | 1.00                          | 1.00           | 0.50                                            | 1.00                          | 1.00           | 0.50                             | 1.00                     | 0.50                              | 1.00            |
| Ion-type               | y <sub>4</sub> | b <sup>+++</sup> <sub>9</sub> | y <sup>++</sup> <sub>11</sub> |        | y <sub>5</sub> | y <sup>++</sup> <sub>12</sub>                        |        |        | b <sub>6</sub> | y <sup>+++</sup> <sub>19</sub> | y <sup>++</sup> <sub>14</sub> |        |        | y <sup>++</sup> <sub>17</sub> | b <sup>++</sup> <sub>18</sub> | y <sub>9</sub> | b <sup>++</sup> <sub>19</sub> -H <sub>2</sub> O | b <sup>++</sup> <sub>19</sub> | b <sub>9</sub> | y <sub>11</sub> -NH <sub>3</sub> | y <sub>11</sub>          | b <sub>11</sub> -H <sub>2</sub> O | b <sub>12</sub> |
| Delta Da               | 0.36           | 0.42                          | 0.70                          |        | 0.54           | 0.61                                                 |        |        | 0.53           | 0.76                           | 0.53                          |        |        | 0.09                          | 0.01                          | 0.08           | 0.03                                            | 0.47                          | 0.09           | -0.52                            | 0.07                     | 0.05                              | 0.16            |

# Peak 28

Ions that verify assignment

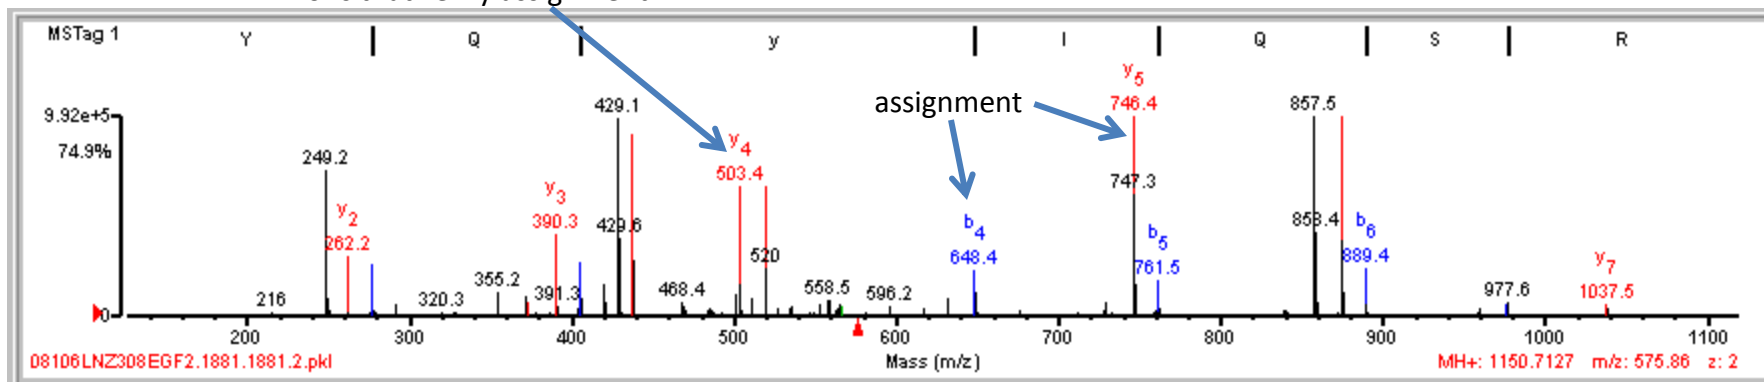

1 16.38 94.8 7 5/25 Y273y (R) I|Y|Q|I|Q|S|R (F) 1070.56 80.1498 159.4 64934.5/9.21 Homo sapiens [5921999](#) [33480](#) dual-specificity tyrosine-(Y)-phosphorylation regulated kinase 1B isoform b

| Fragment-ion (m/z)     | 249.20         | 262.19         | 277.21         | 355.19 | 372.22                           | 390.32         | 405.28         | 420.73 | 429.10                            | 437.91            | 468.36 | 485.51                           | 501.92 | 503.39         | 510.88                            | 519.47            | 563.10 | 648.38         | 746.44         | 761.47 | 857.48         | 874.48                          | 889.44         | 976.41         | 1037.53        |
|------------------------|----------------|----------------|----------------|--------|----------------------------------|----------------|----------------|--------|-----------------------------------|-------------------|--------|----------------------------------|--------|----------------|-----------------------------------|-------------------|--------|----------------|----------------|--------|----------------|---------------------------------|----------------|----------------|----------------|
| Frac. Inten.(% of TIC) | 5.89           | 2.29           | 2.18           | 0.93   | 1.27                             | 3.21           | 2.49           | 1.64   | 10.57                             | 8.15              | 1.14   | 0.73                             | 0.80   | 5.87           | 0.84                              | 6.23              | 0.73   | 2.63           | 14.29          | 1.95   | 11.37          | 10.59                           | 2.39           | 0.97           | 0.85           |
| Rel. Inten.(% of BP)   | 41.23          | 16.03          | 15.23          | 6.49   | 8.91                             | 22.49          | 17.43          | 11.47  | 73.97                             | 57.09             | 7.99   | 5.10                             | 5.58   | 41.12          | 5.91                              | 43.62             | 5.12   | 18.43          | 100.00         | 13.66  | 79.57          | 74.13                           | 16.74          | 6.76           | 5.95           |
| Score                  | 0.25           | 1.00           | 1.00           | -0.06  |                                  | 0.50           | 1.00           | -0.11  | 0.50                              | 1.00              | -0.08  | 0.50                             | -0.06  | 1.00           | 0.50                              | 1.00              | -0.05  | 1.00           | 1.00           | 1.00   | 0.50           | 1.00                            | 1.00           | 1.00           | 1.00           |
| Ion-type               | a <sub>2</sub> | y <sub>2</sub> | b <sub>2</sub> |        | y <sub>3</sub> -H <sub>2</sub> O | y <sub>3</sub> | b <sub>3</sub> |        | y <sub>4</sub> ++H <sub>2</sub> O | y <sub>4</sub> ++ |        | y <sub>4</sub> -H <sub>2</sub> O |        | y <sub>4</sub> | y <sub>4</sub> ++H <sub>2</sub> O | y <sub>4</sub> ++ |        | b <sub>4</sub> | y <sub>5</sub> |        | b <sub>5</sub> | y <sub>6</sub> -NH <sub>3</sub> | y <sub>6</sub> | b <sub>6</sub> | y <sub>7</sub> |
| Delta Da               | 0.04           | 0.04           | 0.06           |        | 0.02                             | 0.11           | 0.07           |        | 0.41                              | 0.22              |        | 0.23                             |        | 0.10           | 0.66                              | 0.24              |        | 0.14           | 0.12           | 0.14   | 0.12           | 0.10                            | 0.05           | -0.01          | 0.08           |

# Peak 29

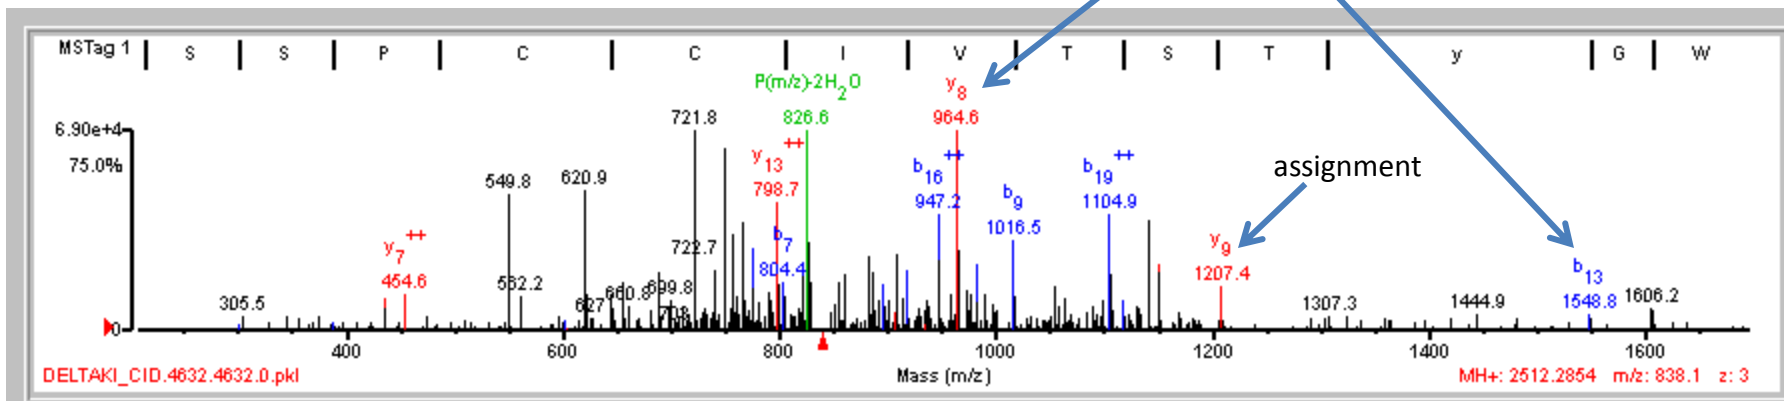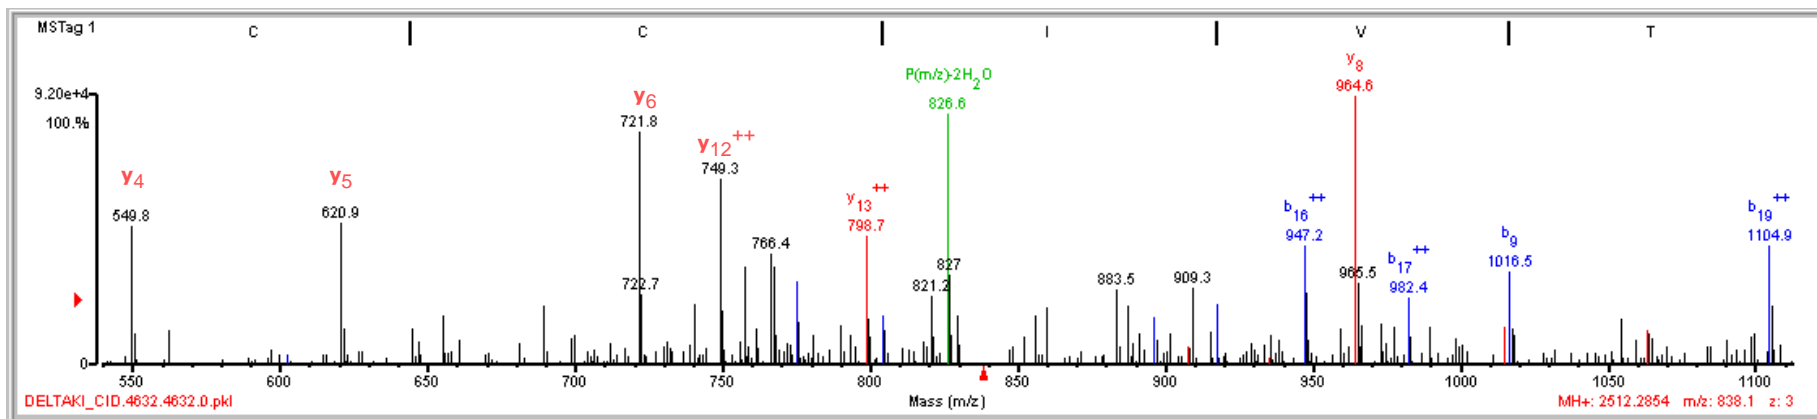

| Fragment-ion (m/z)     | 549.77         | 620.87         | 655.36                        | 721.84         | 749.31                        | 757.61 | 766.37 | 775.19 | 798.72                        | 804.38         | 821.18 | 883.48 | 909.26 | 947.17                          | 964.56         | 973.39 | 982.39 | 998.44                           | 1016.52        | 1063.59                       | 1104.92                       | 1142.07                                         | 1150.72                       |
|------------------------|----------------|----------------|-------------------------------|----------------|-------------------------------|--------|--------|--------|-------------------------------|----------------|--------|--------|--------|---------------------------------|----------------|--------|--------|----------------------------------|----------------|-------------------------------|-------------------------------|-------------------------------------------------|-------------------------------|
| Frac. Inten.(% of TIC) | 4.58           | 5.12           | 2.28                          | 8.35           | 6.70                          | 3.43   | 6.73   | 3.85   | 5.63                          | 2.56           | 3.04   | 2.57   | 2.20   | 6.03                            | 10.66          | 2.31   | 2.58   | 2.05                             | 4.23           | 2.42                          | 4.98                          | 3.94                                            | 3.78                          |
| Rel. Inten.(% of BP)   | 42.94          | 48.05          | 21.42                         | 78.33          | 62.83                         | 32.15  | 63.13  | 36.08  | 52.79                         | 24.04          | 28.50  | 24.12  | 20.66  | 56.60                           | 100.00         | 21.68  | 24.18  | 19.28                            | 39.70          | 22.70                         | 46.69                         | 36.94                                           | 35.49                         |
| Score                  | 1.00           | 1.00           | 1.00                          | 1.00           | 1.00                          | -0.32  | -0.63  | -0.36  | 1.00                          | 1.00           | -0.28  | -0.24  | -0.21  | 0.50                            | 1.00           | -0.22  | -0.24  | 0.50                             | 1.00           | 1.00                          | 1.00                          | 0.50                                            | 1.00                          |
| Ion-type               | y <sub>4</sub> | y <sub>5</sub> | y <sup>++</sup> <sub>10</sub> | y <sub>6</sub> | y <sup>++</sup> <sub>12</sub> |        |        |        | y <sup>++</sup> <sub>13</sub> | b <sub>7</sub> |        |        |        | y <sub>8</sub> -NH <sub>3</sub> | y <sub>8</sub> |        |        | b <sub>9</sub> -H <sub>2</sub> O | b <sub>9</sub> | y <sup>++</sup> <sub>17</sub> | b <sup>++</sup> <sub>19</sub> | y <sup>++</sup> <sub>19</sub> -H <sub>2</sub> O | y <sup>++</sup> <sub>19</sub> |
| Delta Da               | 0.53           | 0.59           | 0.60                          | 0.51           | 0.51                          |        |        |        | 0.39                          | 0.04           |        |        |        | -0.23                           | 0.13           |        |        | -0.04                            | 0.03           | 0.16                          | -0.04                         | 0.61                                            | 0.26                          |

1 11.00 73.3 11 8/23 Y596y (R) L V/S S/P C C\I/V/I T S/T Y/G W/T/A/N M\B R (I) 2432.10 80.1811 85.5 83264.6/4.97 Homo sapiens 20149594 17724 heat shock 90kDa protein 1, beta

# Peak 30

Ions that verify assignment

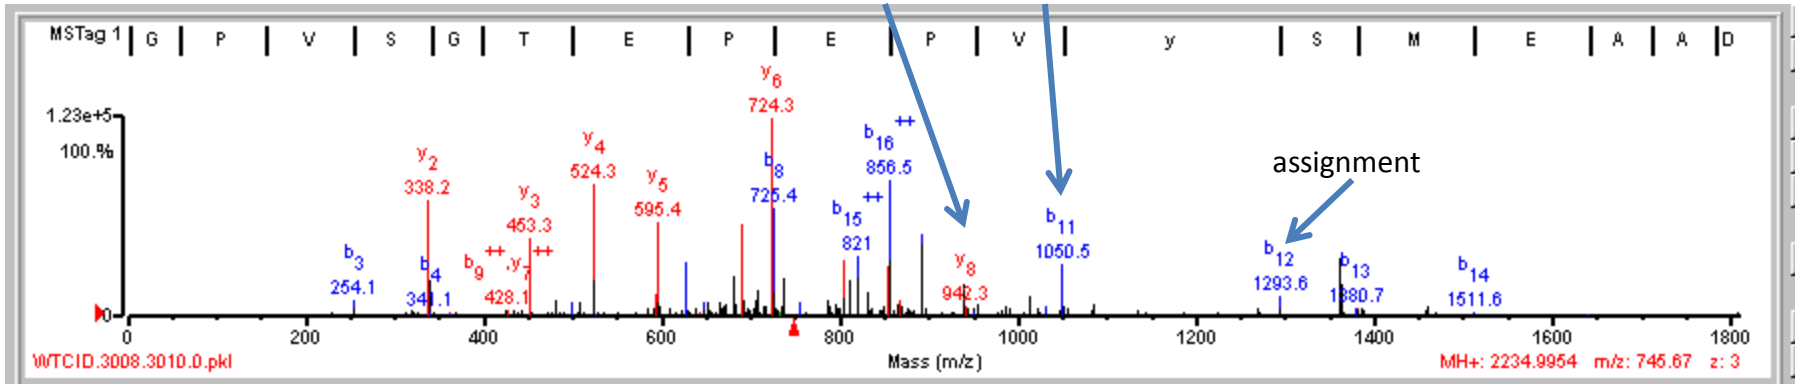

| Rank | Score | SPI (%) | BCS | # Unmatched Ions | Variable sites | Sequence                                         | MH <sup>+</sup> Calculated (Da) | MH <sup>+</sup> Error (Da) | MH <sup>+</sup> Error (ppm) | Protein MW/pI (Da) | Species      | Accession #              | MS-Digest Index #     | Protein Name        |
|------|-------|---------|-----|------------------|----------------|--------------------------------------------------|---------------------------------|----------------------------|-----------------------------|--------------------|--------------|--------------------------|-----------------------|---------------------|
| 1    | 12.33 | 68.7    | 11  | 9/25             | Y446y          | (R)G P V\ S G T/E P E P V\y\ S M/E/A/A/D/Y R (E) | 2154.96                         | 80.0306                    | 28.8                        | 61586.4/5.24       | Homo sapiens | <a href="#">20357552</a> | <a href="#">12463</a> | cortactin isoform a |
| 1    | 12.33 | 68.7    | 11  | 9/25             | Y409y          | (R)G P V\ S G T/E P E P V\y\ S M/E/A/A/D/Y R (E) | 2154.96                         | 80.0306                    | 28.8                        | 57466.9/5.18       | Homo sapiens | <a href="#">20357556</a> | <a href="#">22723</a> | cortactin isoform b |

| Fragment-ion (m/z)     | 254.09         | 338.23         | 453.30         | 524.29         | 595.45         | 628.38         | 682.06                                          | 691.23                        | 706.41                           | 724.34         | 737.70 | 787.38 | 804.40                        | 811.84 | 820.99 | 832.45 | 854.55         | 856.47 | 868.86                        | 891.90 | 940.43 | 1013.29 | 1050.54         | 1293.62         | 1362.58                           |
|------------------------|----------------|----------------|----------------|----------------|----------------|----------------|-------------------------------------------------|-------------------------------|----------------------------------|----------------|--------|--------|-------------------------------|--------|--------|--------|----------------|--------|-------------------------------|--------|--------|---------|-----------------|-----------------|-----------------------------------|
| Frac. Inten.(% of TIC) | 1.14           | 6.44           | 3.68           | 7.34           | 4.66           | 3.19           | 2.57                                            | 5.03                          | 2.16                             | 14.43          | 1.71   | 1.21   | 3.53                          | 2.78   | 4.41   | 1.66   | 4.30           | 8.92   | 1.67                          | 7.76   | 1.56   | 1.26    | 2.83            | 1.42            | 4.35                              |
| Rel. Inten.(% of BP)   | 7.91           | 44.59          | 25.51          | 50.89          | 32.29          | 22.07          | 17.82                                           | 34.89                         | 14.94                            | 100.00         | 11.82  | 8.35   | 24.44                         | 19.25  | 30.56  | 11.53  | 29.77          | 61.83  | 11.56                         | 53.77  | 10.80  | 8.73    | 19.58           | 9.87            | 30.16                             |
| Score                  | 1.00           | 1.00           | 1.00           | 1.00           | 1.00           | 1.00           | 0.50                                            | 1.00                          | 0.50                             | 1.00           | -0.12  | -0.08  | 1.00                          | -0.19  | -0.31  | -0.12  | 1.00           | -0.62  | 1.00                          | -0.54  | -0.11  | -0.09   | 1.00            | 1.00            | 0.50                              |
| Ion-type               | b <sub>3</sub> | y <sub>2</sub> | y <sub>3</sub> | y <sub>4</sub> | y <sub>5</sub> | b <sub>7</sub> | y <sup>++</sup> <sub>11</sub> -H <sub>2</sub> O | y <sup>++</sup> <sub>11</sub> | y <sub>6</sub> -H <sub>2</sub> O | y <sub>6</sub> |        |        | y <sup>++</sup> <sub>13</sub> |        |        |        | b <sub>9</sub> |        | y <sup>++</sup> <sub>14</sub> |        |        |         | b <sub>11</sub> | b <sub>12</sub> | b <sub>13</sub> -H <sub>2</sub> O |
| Delta Da               | -0.06          | 0.05           | 0.09           | 0.04           | 0.17           | 0.09           | -0.21                                           | -0.05                         | 0.09                             | 0.01           |        |        | 0.07                          |        |        |        | 0.16           |        | 0.01                          |        |        |         | 0.03            | 0.08            | 0.02                              |

# Peak 31

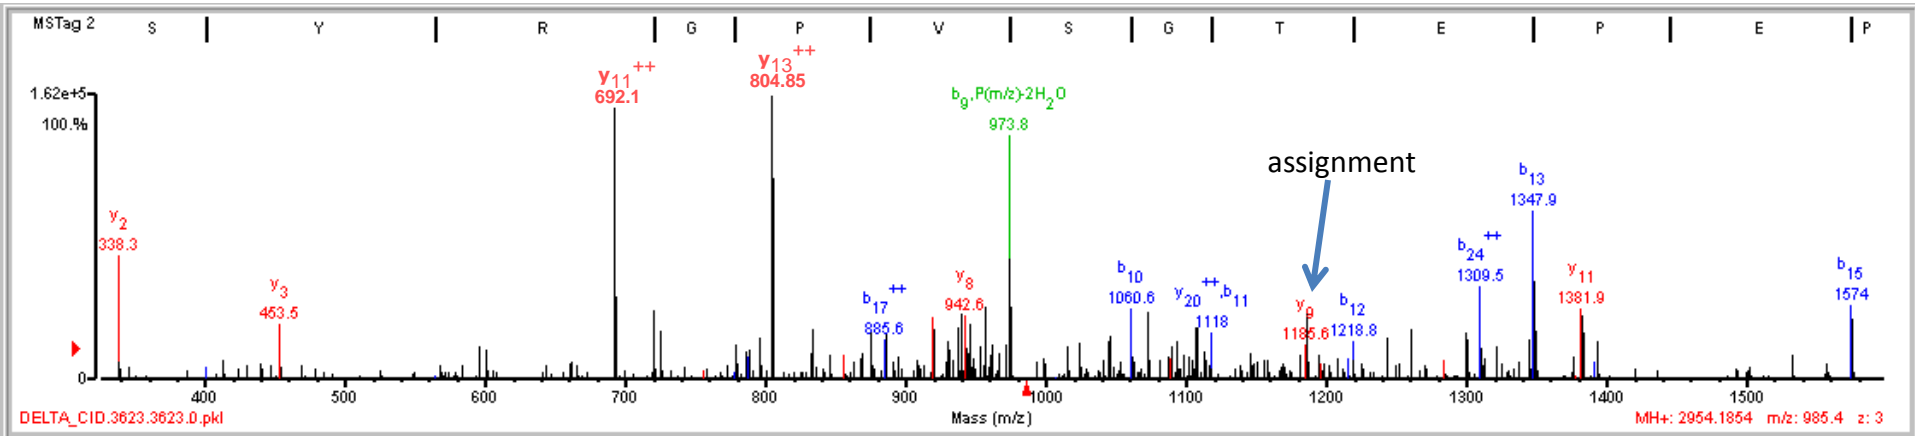

|   |       |      |   |       |       |                                                             |         |         |       |              |              |                          |                       |                     |
|---|-------|------|---|-------|-------|-------------------------------------------------------------|---------|---------|-------|--------------|--------------|--------------------------|-----------------------|---------------------|
| 2 | 12.23 | 76.6 | 9 | 10/25 | Y446y | (K) A E/L S Y R\G P V S\G/T E P E P V\Y/S M E A A/D Y R (E) | 2874.33 | 79.8604 | -35.9 | 61586.4/5.24 | Homo sapiens | <a href="#">20357552</a> | <a href="#">12463</a> | contactin isoform a |
| 2 | 12.23 | 76.6 | 9 | 10/25 | Y409y | (K) A E/L S Y R\G P V S\G/T E P E P V\Y/S M E A A/D Y R (E) | 2874.33 | 79.8604 | -35.9 | 57466.9/5.18 | Homo sapiens | <a href="#">20357556</a> | <a href="#">22723</a> | contactin isoform b |

| Fragment-ion (m/z)      | 338.33         | 453.49         | 692.09         | 720.83         | 804.85                        | 833.72 | 885.56                        | 919.39                        | 930.16 | 940.58 | 942.56         | 957.36 | 975.08 | 1044.63 | 1060.64         | 1073.23 | 1107.36 | 1186.60 | 1260.69 | 1300.17                                         | 1309.47                       | 1347.92         | 1381.87         | 1574.02         | 1607.75         |
|-------------------------|----------------|----------------|----------------|----------------|-------------------------------|--------|-------------------------------|-------------------------------|--------|--------|----------------|--------|--------|---------|-----------------|---------|---------|---------|---------|-------------------------------------------------|-------------------------------|-----------------|-----------------|-----------------|-----------------|
| Frac. Inten. (% of TIC) | 4.24           | 1.88           | 13.33          | 2.15           | 15.39                         | 2.08   | 2.44                          | 3.01                          | 1.97   | 2.23   | 3.29           | 2.07   | 2.42   | 2.81    | 3.03            | 2.45    | 2.82    | 2.33    | 2.28    | 2.55                                            | 3.79                          | 9.26            | 5.45            | 4.69            | 2.05            |
| Rel. Inten. (% of BP)   | 27.54          | 12.21          | 86.61          | 13.99          | 100.00                        | 13.50  | 15.82                         | 19.53                         | 12.79  | 14.47  | 21.34          | 13.45  | 15.75  | 18.25   | 19.70           | 15.89   | 18.29   | 15.12   | 14.79   | 16.56                                           | 24.61                         | 60.16           | 35.41           | 30.49           | 13.34           |
| Score                   | 1.00           | 1.00           | 0.25           | 1.00           | 1.00                          | -0.14  | 1.00                          | 1.00                          | -0.13  | -0.14  | 1.00           | -0.13  | -0.16  | -0.18   | 1.00            | -0.16   | -0.18   | -0.15   | -0.15   | 0.50                                            | 1.00                          | 1.00            | 1.00            | 1.00            | 1.00            |
| Ion-type                | y <sub>2</sub> | y <sub>3</sub> | a <sub>6</sub> | b <sub>6</sub> | y <sup>++</sup> <sub>13</sub> |        | b <sup>++</sup> <sub>17</sub> | y <sup>++</sup> <sub>15</sub> |        |        | y <sub>8</sub> |        |        |         | b <sub>10</sub> |         |         |         |         | b <sup>++</sup> <sub>24</sub> -H <sub>2</sub> O | b <sup>++</sup> <sub>24</sub> | b <sub>13</sub> | y <sub>11</sub> | b <sub>15</sub> | y <sub>13</sub> |
| Delta Da                | 0.15           | 0.28           | -0.28          | 0.46           | 0.52                          |        | 0.12                          | 0.02                          |        |        | 0.16           |        |        |         | 0.10            |         |         |         |         | 0.11                                            | 0.41                          | 0.27            | 0.32            | 0.27            | 0.11            |



# Peak 32

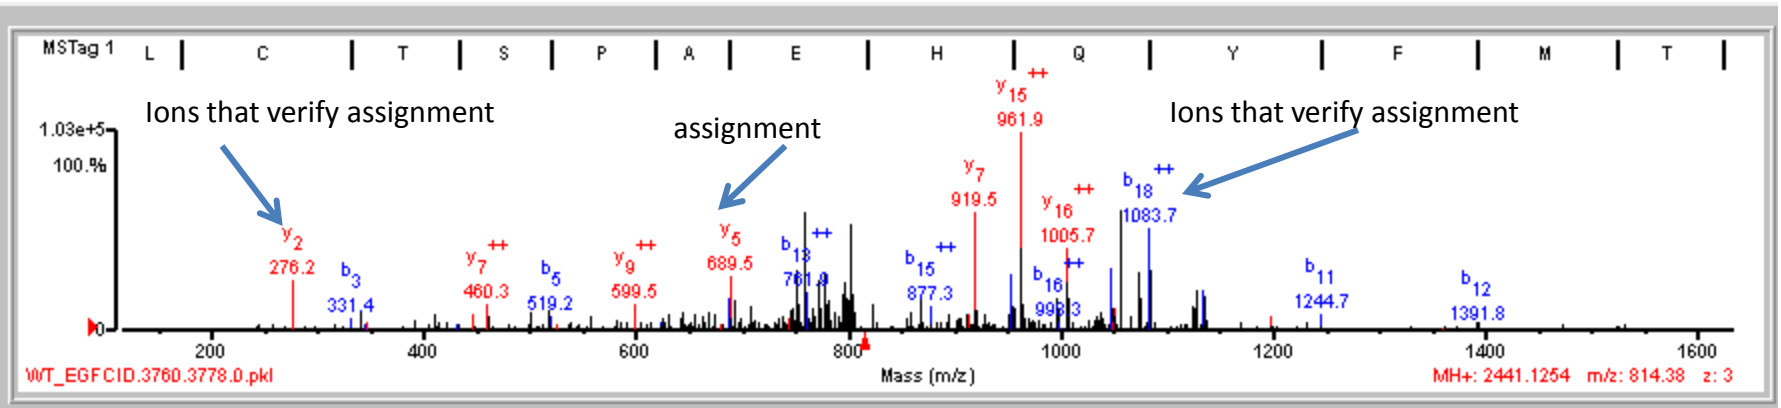

| Rank | Score | SPI (%) | BCS | # Unmatched Ions | Variable sites | Sequence                                        | MH <sup>+</sup> Calculated (Da) | MH <sup>+</sup> Error (Da) | MH <sup>+</sup> Error (ppm) | Protein MW/pI (Da) | Species      | Accession #              | MS-Digest Index #     | Protein Name                                 |
|------|-------|---------|-----|------------------|----------------|-------------------------------------------------|---------------------------------|----------------------------|-----------------------------|--------------------|--------------|--------------------------|-----------------------|----------------------------------------------|
| 1    | 11.59 | 67.0    | 10  | 10/25            | Y221y          | (R) G L/C/T/S/P A E H\Q Y F/M/T E/Y V\A\T R (W) | 2361.06                         | 80.0616                    | 39.0                        | 88415.0/5.60       | Homo sapiens | <a href="#">20986503</a> | <a href="#">1698</a>  | mitogen-activated protein kinase 7 isoform 1 |
| 1    | 11.59 | 67.0    | 10  | 10/25            | Y82y           | (R) G L/C/T/S/P A E H\Q Y F/M/T E/Y V\A\T R (W) | 2361.06                         | 80.0616                    | 39.0                        | 73218.5/5.47       | Homo sapiens | <a href="#">20986499</a> | <a href="#">13120</a> | mitogen-activated protein kinase 7 isoform 2 |
| 1    | 11.59 | 67.0    | 10  | 10/25            | Y221y          | (R) G L/C/T/S/P A E H\Q Y F/M/T E/Y V\A\T R (W) | 2361.06                         | 80.0616                    | 39.0                        | 88415.0/5.60       | Homo sapiens | <a href="#">20986501</a> | <a href="#">35910</a> | mitogen-activated protein kinase 7 isoform 1 |
| 1    | 11.59 | 67.0    | 10  | 10/25            | Y221y          | (R) G L/C/T/S/P A E H\Q Y F/M/T E/Y V\A\T R (W) | 2361.06                         | 80.0616                    | 39.0                        | 88386.9/5.60       | Homo sapiens | <a href="#">20986497</a> | <a href="#">36360</a> | mitogen-activated protein kinase 7 isoform 1 |

  

| Fragment-ion (m/z)      | 689.48         | 707.46 | 746.31 | 751.59 | 758.31                         | 761.91                         | 772.62 | 778.24 | 781.09 | 796.74 | 797.54 | 868.05 | 912.46 | 919.48         | 953.18         | 961.94                        | 996.65                                          | 1005.70                       | 1038.90                                         | 1047.61                       | 1050.56        | 1056.59                       | 1074.61                                         | 1083.67                       | 1127.46 |
|-------------------------|----------------|--------|--------|--------|--------------------------------|--------------------------------|--------|--------|--------|--------|--------|--------|--------|----------------|----------------|-------------------------------|-------------------------------------------------|-------------------------------|-------------------------------------------------|-------------------------------|----------------|-------------------------------|-------------------------------------------------|-------------------------------|---------|
| Frac. Inten. (% of TIC) | 2.56           | 1.82   | 2.07   | 6.43   | 4.92                           | 2.21                           | 2.84   | 5.50   | 0.06   | 2.89   | 3.97   | 2.64   | 1.85   | 6.32           | 3.45           | 13.68                         | 2.93                                            | 5.99                          | 1.79                                            | 4.47                          | 1.81           | 6.07                          | 4.41                                            | 6.37                          | 2.96    |
| Rel. Inten. (% of BP)   | 18.75          | 13.29  | 15.16  | 47.00  | 35.96                          | 16.16                          | 20.73  | 40.24  | 0.42   | 21.12  | 29.04  | 19.27  | 13.52  | 46.22          | 25.22          | 100.00                        | 21.43                                           | 43.84                         | 13.08                                           | 32.67                         | 13.26          | 44.41                         | 32.25                                           | 46.54                         | 21.65   |
| Score                   | 1.00           | -0.13  | -0.15  | -0.47  | 1.00                           | 1.00                           | -0.21  | -0.40  | 1.50   | -0.21  | -0.29  | -0.19  | -0.14  | 1.00           | 1.00           | 1.00                          | 0.50                                            | 1.00                          | 0.50                                            | 1.00                          | 1.00           | 1.00                          | 0.50                                            | 1.00                          | -0.22   |
| Ion-type                | y <sub>5</sub> |        |        |        | y <sup>+++</sup> <sub>18</sub> | b <sup>+++</sup> <sub>13</sub> |        |        | sty    |        |        |        |        | y <sub>7</sub> | b <sub>9</sub> | y <sup>++</sup> <sub>15</sub> | y <sup>++</sup> <sub>16</sub> -H <sub>2</sub> O | y <sup>++</sup> <sub>16</sub> | b <sup>++</sup> <sub>17</sub> -H <sub>2</sub> O | b <sup>++</sup> <sub>17</sub> | y <sub>8</sub> | y <sup>++</sup> <sub>17</sub> | b <sup>++</sup> <sub>18</sub> -H <sub>2</sub> O | b <sup>++</sup> <sub>18</sub> |         |
| Delta Da                | 0.18           |        |        |        | 0.66                           | 0.08                           |        |        | -0.60  |        |        |        |        | 0.09           | -0.23          | 0.03                          | 0.23                                            | 0.27                          | -0.02                                           |                               | -0.31          | 0.13                          | 0.64                                            | 0.18                          | 0.23    |

# Peak 33

Ions that verify assignment      Ions that verify assignment

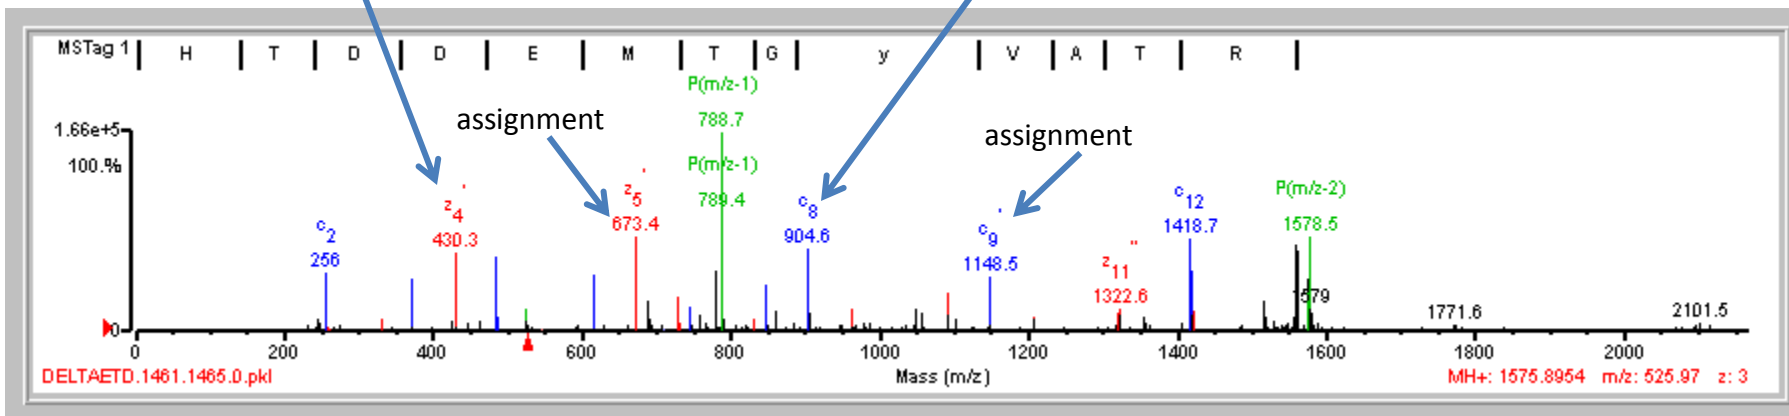

| Rank | Score | SPI (%) | BCS | # Unmatched Ions | Variable sites | Sequence                          | MH <sup>+</sup> Calculated (Da) | MH <sup>+</sup> Error (Da) | MH <sup>+</sup> Error (ppm) | Protein MW/pl (Da) | Species      | Accession #              | MS-Digest Index #     | Protein Name                                  |
|------|-------|---------|-----|------------------|----------------|-----------------------------------|---------------------------------|----------------------------|-----------------------------|--------------------|--------------|--------------------------|-----------------------|-----------------------------------------------|
| 1    | 16.88 | 92.1    | 10  | 4/23             | Y182y          | (R) H/T D D E M T G Y V A T\R (W) | 1495.65                         | 80.2473                    | 178.3                       | 41293.5/5.48       | Homo sapiens | <a href="#">20986512</a> | <a href="#">22099</a> | mitogen-activated protein kinase 14 isoform 2 |
| 1    | 16.88 | 92.1    | 10  | 4/23             | Y182y          | (R) H/T D D E M T G Y V A T\R (W) | 1495.65                         | 80.2473                    | 178.3                       | 34091.8/8.25       | Homo sapiens | <a href="#">20986514</a> | <a href="#">23816</a> | mitogen-activated protein kinase 14 isoform 3 |
| 1    | 16.88 | 92.1    | 10  | 4/23             | Y182y          | (R) H/T D D E M T G Y V A T\R (W) | 1495.65                         | 80.2473                    | 178.3                       | 35453.6/8.94       | Homo sapiens | <a href="#">20986516</a> | <a href="#">25290</a> | mitogen-activated protein kinase 14 isoform 4 |
| 1    | 16.88 | 92.1    | 10  | 4/23             | Y182y          | (R) H/T D D E M T G Y V A T\R (W) | 1495.65                         | 80.2473                    | 178.3                       | 41493.7/5.54       | Homo sapiens | <a href="#">4503069</a>  | <a href="#">36149</a> | mitogen-activated protein kinase 14 isoform 1 |

| Fragment-ion (m/z)     | 245.19 | 256.01         | 371.15         | 430.32          | 486.33         | 615.36         | 673.35          | 689.39         | 730.44          | 746.43         | 831.55          | 847.52         | 860.41 | 904.55         | 962.60          | 1057.61 | 1091.55         | 1147.42        | 1206.63          | 1322.55           | 1356.70 | 1418.66         | 1422.52          |
|------------------------|--------|----------------|----------------|-----------------|----------------|----------------|-----------------|----------------|-----------------|----------------|-----------------|----------------|--------|----------------|-----------------|---------|-----------------|----------------|------------------|-------------------|---------|-----------------|------------------|
| Frac. Inten.(% of TIC) | 1.60   | 4.14           | 3.95           | 6.33            | 6.28           | 4.92           | 7.93            | 2.16           | 2.81            | 1.63           | 1.57            | 5.20           | 1.92   | 9.48           | 2.80            | 2.24    | 5.82            | 7.37           | 2.27             | 2.56              | 2.12    | 12.62           | 2.29             |
| Rel. Inten.(% of BP)   | 12.69  | 32.80          | 31.33          | 50.20           | 49.79          | 39.01          | 62.82           | 17.13          | 22.26           | 12.90          | 12.42           | 41.20          | 15.25  | 75.13          | 22.16           | 17.79   | 46.15           | 58.42          | 18.01            | 20.27             | 16.77   | 100.00          | 18.12            |
| Score                  | -0.13  | 1.00           | 1.00           | 1.00            | 1.00           | 1.00           | 1.00            | 0.25           | 1.00            | 1.00           | 1.00            | 1.00           | -0.15  | 1.00           | 1.00            | -0.18   | 1.00            | 1.00           | 1.00             | 0.25              | -0.17   | 1.00            | 1.00             |
| Ion-type               |        | c <sub>2</sub> | c <sub>3</sub> | z' <sub>4</sub> | c <sub>4</sub> | c <sub>5</sub> | z' <sub>5</sub> | y <sub>5</sub> | z' <sub>6</sub> | c <sub>6</sub> | z' <sub>7</sub> | c <sub>7</sub> |        | c <sub>8</sub> | z' <sub>8</sub> |         | z' <sub>9</sub> | c <sub>9</sub> | z' <sub>10</sub> | z'' <sub>11</sub> |         | c <sub>12</sub> | z' <sub>12</sub> |
| Delta Da               |        | -0.13          | -0.02          | 0.07            | 0.14           | 0.12           | 0.07            | 0.09           | 0.14            | 0.15           | 0.20            | 0.19           |        | 0.20           | 0.21            |         | 0.11            | 0.04           | 0.17             | 0.05              |         | 0.13            | -0.02            |

# Peak 34

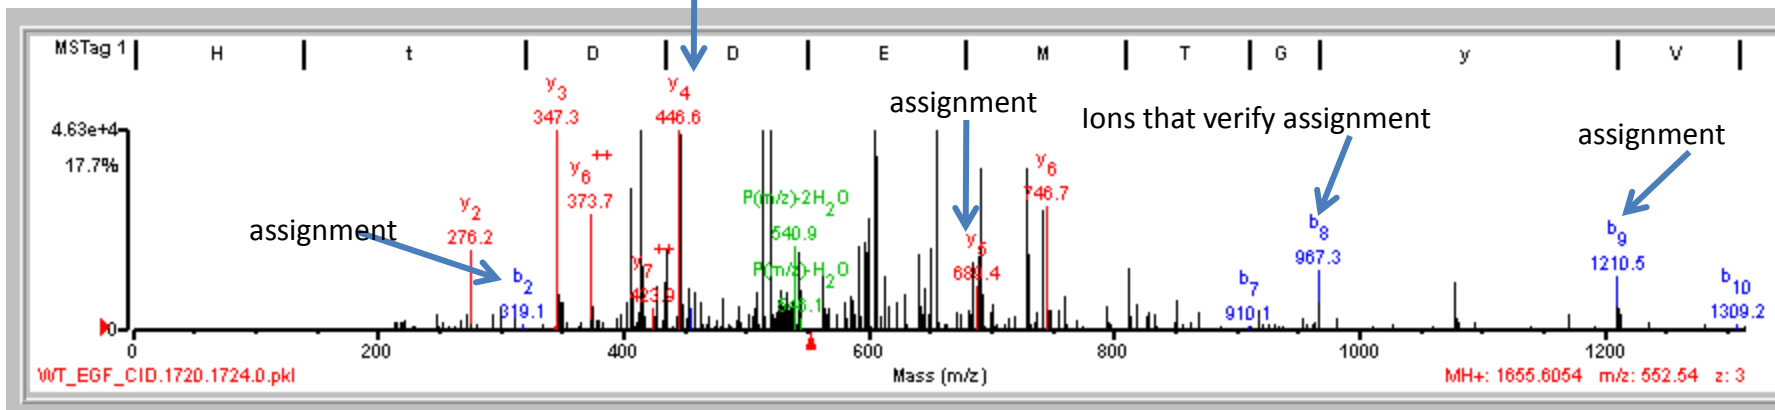

| Rank | Score | SPI (%) | BCS | # Unmatched Ions | Variable sites | Sequence                                    | MH <sup>+</sup> Calculated (Da) | MH <sup>+</sup> Error (Da) | MH <sup>+</sup> Error (ppm) | Protein MW/pI (Da) | Species      | Accession #              | MS-Digest Index #     | Protein Name                                  |
|------|-------|---------|-----|------------------|----------------|---------------------------------------------|---------------------------------|----------------------------|-----------------------------|--------------------|--------------|--------------------------|-----------------------|-----------------------------------------------|
| 1    | 12.76 | 83.5    | 5   | 8/24             | T175t Y182y    | (R) H t D D E M T / G   y   V   A \ T R (W) | 1495.65                         | 159.9573                   | 14.9                        | 41293.5/5.48       | Homo sapiens | <a href="#">20986512</a> | <a href="#">22099</a> | mitogen-activated protein kinase 14 isoform 2 |
| 1    | 12.76 | 83.5    | 5   | 8/24             | T175t Y182y    | (R) H t D D E M T / G   y   V   A \ T R (W) | 1495.65                         | 159.9573                   | 14.9                        | 34091.8/8.25       | Homo sapiens | <a href="#">20986514</a> | <a href="#">23816</a> | mitogen-activated protein kinase 14 isoform 3 |
| 1    | 12.76 | 83.5    | 5   | 8/24             | T175t Y182y    | (R) H t D D E M T / G   y   V   A \ T R (W) | 1495.65                         | 159.9573                   | 14.9                        | 35453.6/8.94       | Homo sapiens | <a href="#">20986516</a> | <a href="#">25290</a> | mitogen-activated protein kinase 14 isoform 4 |
| 1    | 12.76 | 83.5    | 5   | 8/24             | T175t Y182y    | (R) H t D D E M T / G   y   V   A \ T R (W) | 1495.65                         | 159.9573                   | 14.9                        | 41493.7/5.54       | Homo sapiens | <a href="#">4503069</a>  | <a href="#">36149</a> | mitogen-activated protein kinase 14 isoform 1 |

| Fragment-ion (m/z)      | 347.27         | 373.74                         | 406.79         | 415.47                           | 435.28 | 446.58         | 514.57 | 520.47         | 528.92 | 534.10 | 592.36 | 597.63 | 599.95 | 606.25            | 642.09 | 655.66             | 689.38         | 691.32             | 729.54                          | 742.02 | 746.67         | 812.55                                         | 967.30         | 1210.49        |
|-------------------------|----------------|--------------------------------|----------------|----------------------------------|--------|----------------|--------|----------------|--------|--------|--------|--------|--------|-------------------|--------|--------------------|----------------|--------------------|---------------------------------|--------|----------------|------------------------------------------------|----------------|----------------|
| Frac. Inten. (% of TIC) | 4.98           | 1.92                           | 3.32           | 6.00                             | 2.12   | 16.02          | 0.17   | 0.72           | 1.78   | 1.61   | 1.72   | 2.51   | 3.05   | 22.48             | 1.66   | 11.15              | 1.81           | 3.21               | 3.98                            | 2.08   | 2.49           | 1.56                                           | 1.71           | 1.96           |
| Rel. Inten. (% of BP)   | 22.14          | 8.53                           | 14.77          | 26.68                            | 9.43   | 71.27          | 0.76   | 3.22           | 7.93   | 7.17   | 7.64   | 11.18  | 13.56  | 100.00            | 7.39   | 49.59              | 8.07           | 14.26              | 17.69                           | 9.26   | 11.10          | 6.94                                           | 7.63           | 8.74           |
| Score                   | 1.00           | 1.00                           | 0.25           | 0.50                             | -0.09  | 1.00           | 0.25   | 1.50           | -0.08  | -0.07  | -0.08  | -0.11  | -0.14  | 1.00              | -0.07  | 1.00               | 1.00           | 1.00               | 0.50                            | -0.09  | 1.00           | 0.25                                           | 1.00           | 1.00           |
| Ion-type                | y <sub>3</sub> | y <sub>3</sub> ++ <sub>e</sub> | a <sub>3</sub> | b <sub>3</sub> -H <sub>2</sub> O |        | y <sub>4</sub> | st     | a <sub>4</sub> |        |        |        |        |        | b <sub>9</sub> ++ |        | b <sub>10</sub> ++ | y <sub>5</sub> | b <sub>11</sub> ++ | y <sub>6</sub> -NH <sub>3</sub> |        | y <sub>6</sub> | b <sub>7</sub> -H <sub>3</sub> PO <sub>4</sub> | b <sub>8</sub> | b <sub>9</sub> |
| Delta Da                | 0.07           | 0.07                           | 0.68           | -0.63                            |        | 0.31           | 0.70   | -0.67          |        |        |        |        |        | 0.59              |        | 0.46               | 0.08           | 0.61               | 0.24                            |        | 0.35           | 0.26                                           | 0.01           | 0.17           |

# Peak 35

Ions that verify assignment

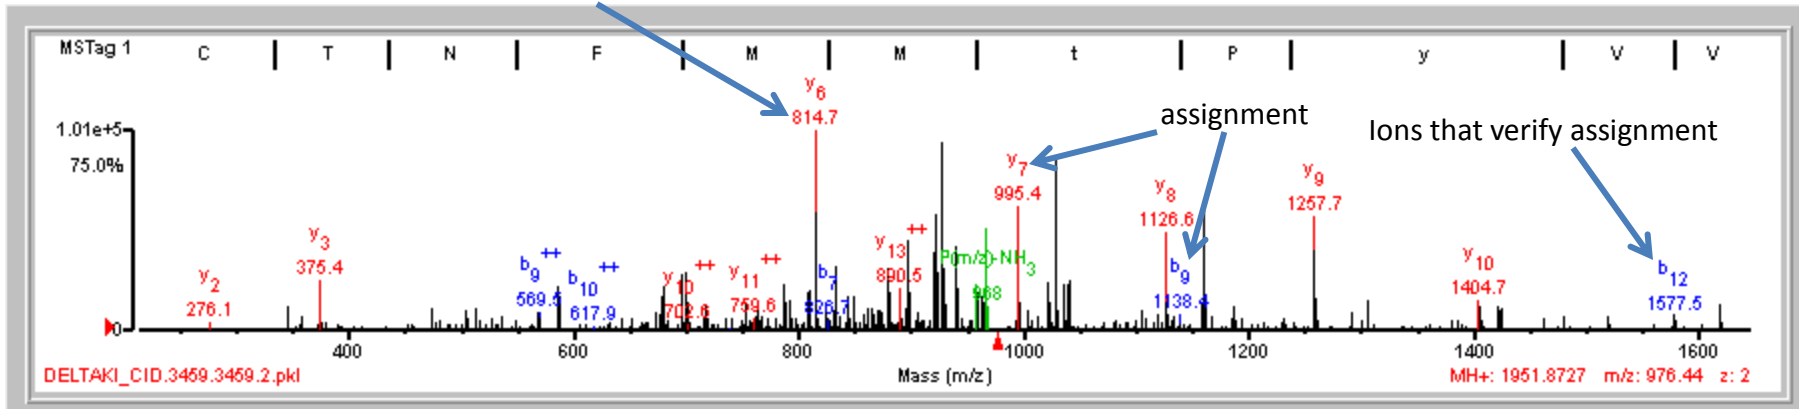

| Rank | Score | SPI (%) | BCS | # Unmatched Ions | Variable sites | Sequence                              | MH <sup>+</sup> Calculated (Da) | MH <sup>+</sup> Error (Da) | MH <sup>+</sup> Error (ppm) | Protein MW/pi (Da) | Species      | Accession #              | MS-Digest Index #     | Protein Name                                           |
|------|-------|---------|-----|------------------|----------------|---------------------------------------|---------------------------------|----------------------------|-----------------------------|--------------------|--------------|--------------------------|-----------------------|--------------------------------------------------------|
| 1    | 7.52  | 64.7    | 6   | 11/25            | T183t Y185y    | (R) T A/C T N F/M/M/t/P y V/V T R (Y) | 1791.82                         | 160.0501                   | 60.1                        | 48311.6/5.49       | Homo sapiens | <a href="#">21237745</a> | <a href="#">669</a>   | mitogen-activated protein kinase 9 isoform JNK2 beta2  |
| 1    | 7.52  | 64.7    | 6   | 11/25            | T183t Y185y    | (R) T A/C T N F/M/M/t/P y V/V T R (Y) | 1791.82                         | 160.0501                   | 60.1                        | 44051.1/5.98       | Homo sapiens | <a href="#">21237739</a> | <a href="#">13828</a> | mitogen-activated protein kinase 9 isoform JNK2 alpha1 |
| 1    | 7.52  | 64.7    | 6   | 11/25            | T183t Y185y    | (R) T A/C T N F/M/M/t/P y V/V T R (Y) | 1791.82                         | 160.0501                   | 60.1                        | 48139.4/5.41       | Homo sapiens | <a href="#">21237736</a> | <a href="#">20715</a> | mitogen-activated protein kinase 9 isoform JNK2 alpha2 |
| 1    | 7.52  | 64.7    | 6   | 11/25            | T183t Y185y    | (R) T A/C T N F/M/M/t/P y V/V T R (Y) | 1791.82                         | 160.0501                   | 60.1                        | 44223.4/6.10       | Homo sapiens | <a href="#">21237742</a> | <a href="#">24588</a> | mitogen-activated protein kinase 9 isoform JNK2 beta1  |

  

| Fragment-ion (m/z)      | 375.40         | 587.09 | 678.81                          | 699.92                          | 787.05 | 808.56                           | 814.71         | 832.91 | 848.57 | 879.64 | 890.50                                         | 897.62 | 919.64 | 922.49 | 927.47 | 940.47                          | 962.89 | 995.44         | 1022.53 | 1028.53                                        | 1040.38                                        | 1126.58        | 1160.44 | 1257.69        | 1405.55 |
|-------------------------|----------------|--------|---------------------------------|---------------------------------|--------|----------------------------------|----------------|--------|--------|--------|------------------------------------------------|--------|--------|--------|--------|---------------------------------|--------|----------------|---------|------------------------------------------------|------------------------------------------------|----------------|---------|----------------|---------|
| Frac. Inten. (% of TIC) | 1.85           | 2.53   | 2.42                            | 2.78                            | 2.24   | 3.25                             | 12.96          | 3.58   | 2.08   | 4.22   | 2.23                                           | 4.55   | 4.10   | 5.73   | 0.31   | 4.68                            | 2.16   | 4.96           | 2.36    | 8.49                                           | 3.63                                           | 4.96           | 4.33    | 7.60           | 2.00    |
| Rel. Inten. (% of BP)   | 14.30          | 19.56  | 18.67                           | 21.45                           | 17.26  | 25.06                            | 100.00         | 27.64  | 16.04  | 32.60  | 17.23                                          | 35.14  | 31.60  | 44.22  | 2.36   | 36.13                           | 16.65  | 38.30          | 18.23   | 65.54                                          | 27.97                                          | 38.27          | 33.38   | 58.65          | 15.39   |
| Score                   | 1.00           | -0.20  | 0.50                            | 0.50                            | -0.17  | 0.50                             | 1.00           | -0.28  | -0.16  | -0.33  | 1.00                                           | 0.25   | -0.32  | -0.44  | 1.50   | 0.50                            | -0.17  | 1.00           | -0.18   | 0.25                                           | 0.25                                           | 1.00           | -0.33   | 1.00           | -0.15   |
| Ion-type                | y <sub>3</sub> |        | b <sub>6</sub> -NH <sub>3</sub> | y <sub>5</sub> -NH <sub>3</sub> |        | b <sub>7</sub> -H <sub>2</sub> O | y <sub>6</sub> |        |        |        | y <sub>7</sub> -H <sub>3</sub> PO <sub>4</sub> |        |        |        | sty    | b <sub>8</sub> -NH <sub>3</sub> |        | y <sub>7</sub> |         | y <sub>8</sub> -H <sub>3</sub> PO <sub>4</sub> | b <sub>9</sub> -H <sub>3</sub> PO <sub>4</sub> | y <sub>8</sub> |         | y <sub>9</sub> |         |
| Delta Da                | 0.16           |        | 0.55                            | -0.39                           |        | 0.25                             | 0.32           |        |        |        | 0.16                                           | 0.20   |        |        | 0.08   | 0.13                            |        | 0.04           |         | 0.07                                           | -0.02                                          | 0.14           |         | 0.21           |         |

# Peak 36

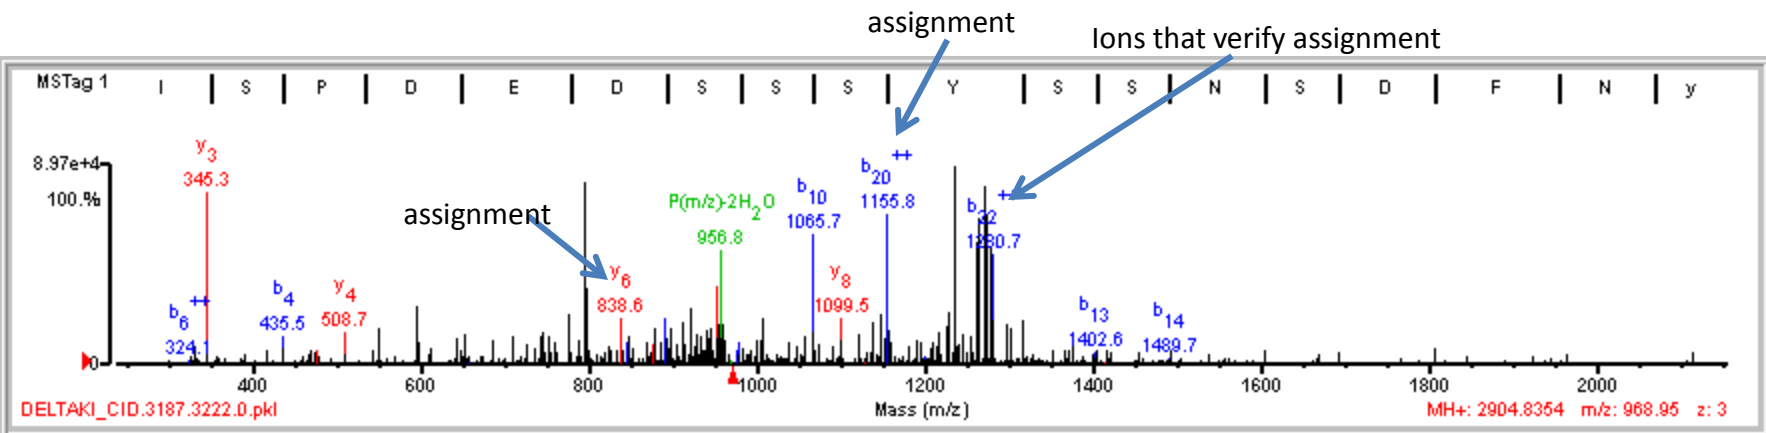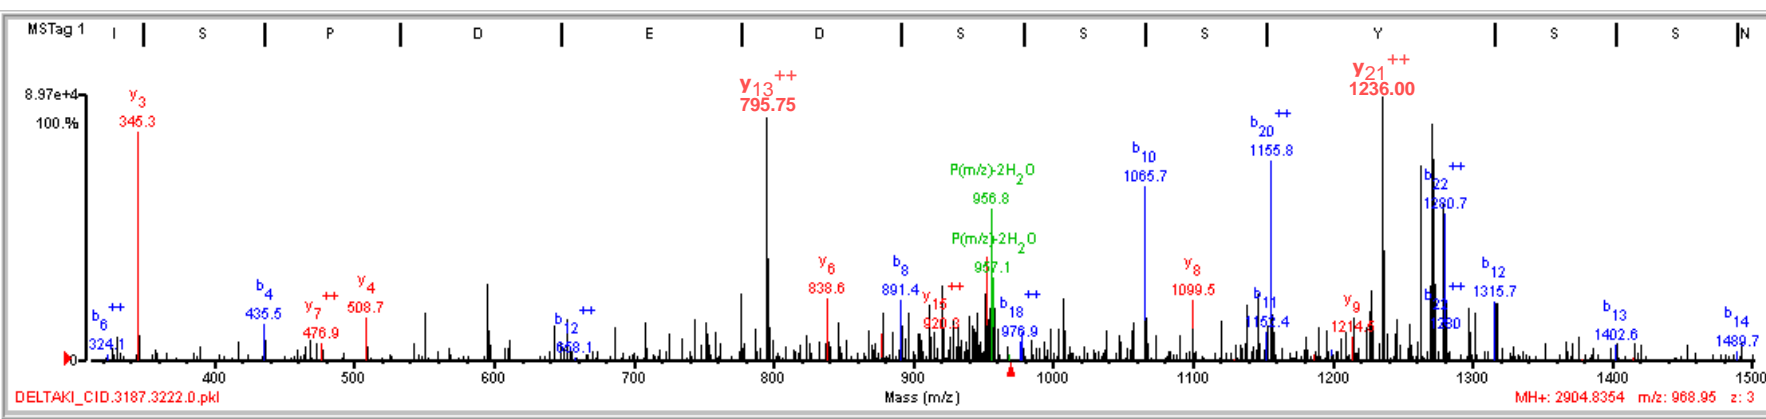

| Rank                   | Score          | SPI (%)        | BCS               | # Unmatched ions | Variable sites    | Sequence                                                                        | MH* Calculated (Da) | MH* Error (Da)     | MH* Error (ppm) | Protein MW/pl (Da) | Species                             | Accession #                         | MS-Digest Index #     | Protein Name                       |                                     |                   |                   |                   |                   |                   |                                     |                   |                   |                                   |         |
|------------------------|----------------|----------------|-------------------|------------------|-------------------|---------------------------------------------------------------------------------|---------------------|--------------------|-----------------|--------------------|-------------------------------------|-------------------------------------|-----------------------|------------------------------------|-------------------------------------|-------------------|-------------------|-------------------|-------------------|-------------------|-------------------------------------|-------------------|-------------------|-----------------------------------|---------|
| 1                      | 13.30          | 71.1           | 12                | 7/25             | Y28y              | (R) F S I / S / P D E \ D I S S \ S Y / S / N S D / E / N / Y I S Y / P T K (Q) | 2824.17             | 80.6610            | 239.2           | 56026.3/8.08       | Homo sapiens                        | <a href="#">21361602</a>            | <a href="#">33694</a> | solute carrier family 38, member 2 |                                     |                   |                   |                   |                   |                   |                                     |                   |                   |                                   |         |
| Fragment-ion (m/z)     | 345.34         | 595.90         | 752.24            | 776.79           | 795.75            | 838.65                                                                          | 891.44              | 911.27             | 921.24          | 932.50             | 952.28                              | 1007.86                             | 1065.66               | 1099.53                            | 1146.67                             | 1155.78           | 1226.78           | 1227.48           | 1236.00           | 1262.92           | 1270.34                             | 1271.62           | 1279.48           | 1297.51                           | 1316.57 |
| Frac. Inten.(% of TIC) | 5.16           | 2.51           | 1.80              | 2.40             | 7.77              | 2.20                                                                            | 2.04                | 2.03               | 2.51            | 1.66               | 4.90                                | 1.97                                | 5.79                  | 2.23                               | 2.45                                | 6.48              | 1.66              | 2.18              | 8.01              | 7.26              | 2.35                                | 10.70             | 9.37              | 2.04                              | 2.56    |
| Rel. Inten.(% of BP)   | 48.22          | 23.45          | 16.82             | 22.40            | 72.65             | 20.56                                                                           | 19.02               | 18.93              | 23.45           | 15.50              | 45.80                               | 18.43                               | 54.14                 | 20.84                              | 22.89                               | 60.52             | 15.47             | 20.33             | 74.82             | 67.85             | 21.96                               | 100.00            | 87.53             | 19.04                             | 23.97   |
| Score                  | 1.00           | 1.00           | 1.00              | 1.00             | 1.00              | 1.00                                                                            | 1.00                | -0.19              | -0.23           | -0.16              | 1.00                                | 1.00                                | 1.00                  | 1.00                               | 0.50                                | 1.00              | 0.50              | -0.20             | 1.00              | -0.68             | 0.50                                | -1.00             | 1.00              | 0.50                              | -0.24   |
| Ion-type               | y <sub>3</sub> | y <sub>5</sub> | y <sub>++12</sub> | b <sub>7</sub>   | y <sub>++13</sub> | y <sub>6</sub>                                                                  | b <sub>8</sub>      | y <sub>++17</sub>  | b <sub>10</sub> | y <sub>8</sub>     | b <sub>++20</sub> -H <sub>2</sub> O | b <sub>++21</sub> -H <sub>2</sub> O | b <sub>++20</sub>     | y <sub>++21</sub>                  | y <sub>++21</sub> -H <sub>2</sub> O | y <sub>++21</sub> | y <sub>++22</sub> -H <sub>2</sub> O | y <sub>++22</sub> | y <sub>++22</sub> | b <sub>12</sub> -H <sub>2</sub> O |         |
| Delta Da               | 0.13           | 0.59           | 0.44              | 0.44             | 0.44              | 0.31                                                                            | 0.07                | y <sub>+++23</sub> | 0.76            | -0.10              | 0.47                                | 0.22                                | 0.08                  | 0.25                               | 0.36                                | 0.32              | 0.53              | 0.36              | 0.53              | 0.36              | 0.36                                | 0.50              | 0.50              | -0.01                             |         |

# Peak 37

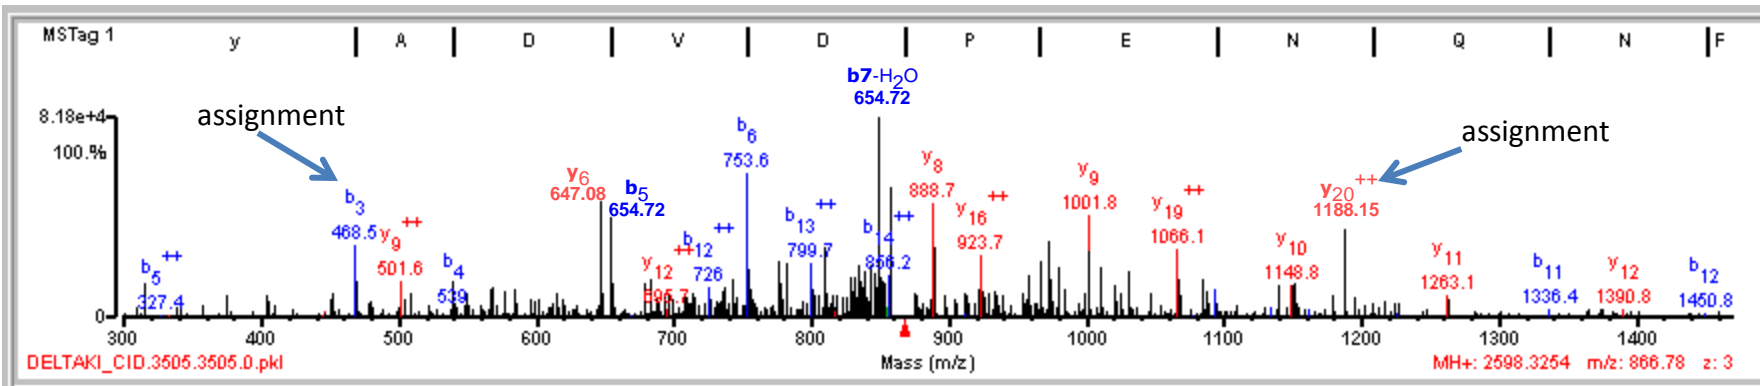

| Rank                    | Score          | SPI (%) | BCS            | # Unmatched Ions | Variable sites                   | Sequence                                                                  | MH* Calculated (Da)            | MH* Error (Da) | MH* Error (ppm)                | Protein MW/pi (Da) | Species      | Accession #              | MS-Digest Index #     | Protein Name                       |        |                |                                |                                |         |                                                  |                                |                                |                |                |                 |                                |
|-------------------------|----------------|---------|----------------|------------------|----------------------------------|---------------------------------------------------------------------------|--------------------------------|----------------|--------------------------------|--------------------|--------------|--------------------------|-----------------------|------------------------------------|--------|----------------|--------------------------------|--------------------------------|---------|--------------------------------------------------|--------------------------------|--------------------------------|----------------|----------------|-----------------|--------------------------------|
| 1                       | 16.35          | 78.8    | 12             | 6/25             | Y41y                             | (K) S H/Y   A/D   V   D P E \ N Q N / F   L / L / E / S \ N L G \ K K (K) | 2518.22                        | 80.1046        | 53.2                           | 56026.3/8.08       | Homo sapiens | <a href="#">21361602</a> | <a href="#">33694</a> | solute carrier family 38, member 2 |        |                |                                |                                |         |                                                  |                                |                                |                |                |                 |                                |
| Fragment-ion (m/z)      | 468.52         | 566.75  | 647.08         | 654.72           | 735.84                           | 753.63                                                                    | 775.95                         | 782.26         | 799.67                         | 810.71             | 834.72       | 837.66                   | 846.46                | 849.65                             | 857.84 | 888.71         | 923.74                         | 973.64                         | 1001.79 | 1021.12                                          | 1031.06                        | 1066.13                        | 1094.34        | 1148.75        | 1188.15         |                                |
| Frac. Inten. (% of TIC) | 3.85           | 2.31    | 4.99           | 5.32             | 2.27                             | 7.56                                                                      | 2.05                           | 2.19           | 2.76                           | 3.74               | 0.10         | 2.79                     | 2.47                  | 9.85                               | 7.70   | 6.85           | 3.90                           | 3.76                           | 5.90    | 2.10                                             | 3.09                           | 5.35                           | 2.11           | 2.52           | 4.48            |                                |
| Rel. Inten. (% of BP)   | 39.13          | 23.43   | 50.66          | 54.09            | 23.07                            | 76.81                                                                     | 20.80                          | 22.20          | 28.01                          | 38.00              | 1.04         | 28.34                    | 25.07                 | 100.00                             | 78.21  | 69.60          | 39.64                          | 38.18                          | 59.95   | 21.32                                            | 31.35                          | 54.38                          | 21.39          | 25.57          | 45.47           |                                |
| Score                   | 1.00           | -0.23   | 1.00           | 1.00             | 0.50                             | 1.00                                                                      | 1.00                           | -0.22          | 1.00                           | -0.38              | 1.50         | -0.28                    | -0.25                 | 0.50                               | -0.78  | 1.00           | 1.00                           | 1.00                           | 1.00    | 1.00                                             | 1.00                           | 1.00                           | 1.00           | 1.00           | 1.00            |                                |
| Ion-type                | b <sub>3</sub> |         | y <sub>6</sub> | b <sub>5</sub>   | b <sub>6</sub> -H <sub>2</sub> O | b <sub>6</sub>                                                            | b <sup>+++</sup> <sub>20</sub> |                | b <sup>+++</sup> <sub>13</sub> |                    | sty          |                          |                       | b <sub>7</sub> -H <sub>2</sub> O   |        | y <sub>8</sub> | y <sup>+++</sup> <sub>16</sub> | y <sup>+++</sup> <sub>17</sub> |         | y <sub>9</sub>                                   | b <sup>+++</sup> <sub>17</sub> | y <sup>+++</sup> <sub>18</sub> | a <sub>9</sub> | b <sub>9</sub> | y <sub>10</sub> | y <sup>+++</sup> <sub>20</sub> |
| Delta Da                | 0.39           |         | 0.69           | 0.53             | 0.59                             | 0.37                                                                      | 0.62                           |                | 0.37                           |                    | 0.65         |                          | -0.63                 |                                    | 0.20   | 0.27           | 0.64                           |                                | 0.19    | 0.70                                             | 0.54                           | -0.26                          | -0.04          | 0.08           | 0.60            |                                |
|                         |                |         |                |                  |                                  |                                                                           | y <sub>7</sub>                 |                |                                |                    |              |                          |                       |                                    |        |                |                                |                                |         | y <sup>+++</sup> <sub>18</sub> -H <sub>2</sub> O |                                | y <sup>+++</sup> <sub>19</sub> |                |                |                 |                                |



# Peak 39

Ions that verify assignment

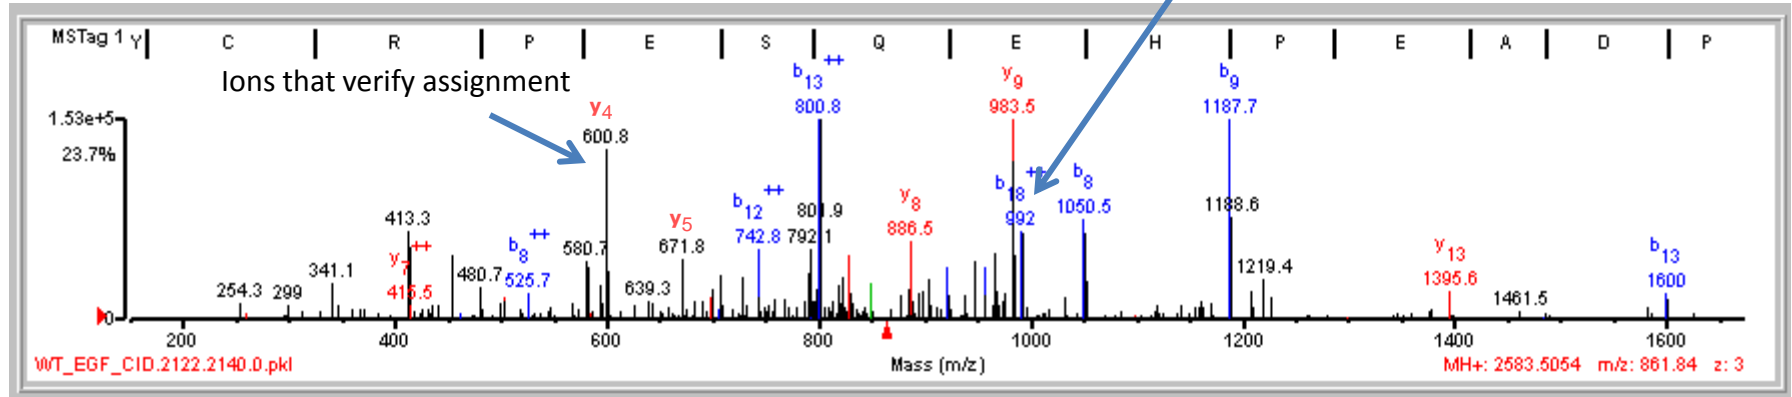

| Rank                    | Score  | SPI (%) | BCS            | # Unmatched Ions | Variable sites                  | Sequence                          | MH* Calculated (Da) | MH* Error (Da)                     | MH* Error (ppm)  | Protein MW/pi (Da)                 | Species                            | Accession #              | MS-Digest Index #     | Protein Name                                                 |                |                                 |                                |                                    |                  |                                 |                                 |                                    |                  |                |                |
|-------------------------|--------|---------|----------------|------------------|---------------------------------|-----------------------------------|---------------------|------------------------------------|------------------|------------------------------------|------------------------------------|--------------------------|-----------------------|--------------------------------------------------------------|----------------|---------------------------------|--------------------------------|------------------------------------|------------------|---------------------------------|---------------------------------|------------------------------------|------------------|----------------|----------------|
| 1                       | 19.24  | 92.3    | 11             | 4/25             | Y705y                           | (K)YCRPESQVEHPVADIP/G/SIAAPYLK(T) | 2502.14             | 81.3700                            | 543.3            | 88068.3/5.94                       | Homo sapiens                       | <a href="#">21618340</a> | <a href="#">25132</a> | signal transducer and activator of transcription 3 isoform 1 |                |                                 |                                |                                    |                  |                                 |                                 |                                    |                  |                |                |
| 1                       | 19.24  | 92.3    | 11             | 4/25             | Y705y                           | (K)YCRPESQVEHPVADIP/G/SIAAPYLK(T) | 2502.14             | 81.3700                            | 543.3            | 83126.9/6.70                       | Homo sapiens                       | <a href="#">47458820</a> | <a href="#">28398</a> | signal transducer and activator of transcription 3 isoform 3 |                |                                 |                                |                                    |                  |                                 |                                 |                                    |                  |                |                |
| Fragment-ion (m/z)      | 413.28 | 454.38  | 480.67         | 580.68           | 582.79                          | 600.84                            | 671.77              | 698.67                             | 707.74           | 742.84                             | 792.08                             | 800.76                   | 823.85                | 829.41                                                       | 886.51         | 903.63                          | 921.33                         | 948.11                             | 956.58           | 965.67                          | 966.63                          | 983.53                             | 992.03           | 1050.51        | 1187.67        |
| Frac. Inten. (% of TIC) | 3.72   | 1.36    | 1.25           | 1.35             | 1.35                            | 4.89                              | 1.86                | 1.24                               | 1.75             | 2.25                               | 2.12                               | 29.31                    | 1.25                  | 0.07                                                         | 1.81           | 1.33                            | 1.77                           | 1.47                               | 1.92             | 1.17                            | 2.48                            | 17.10                              | 4.91             | 4.78           | 7.49           |
| Rel. Inten. (% of BP)   | 12.71  | 4.65    | 4.28           | 4.61             | 4.62                            | 16.69                             | 6.35                | 4.22                               | 5.96             | 7.67                               | 7.22                               | 100.00                   | 4.26                  | 0.24                                                         | 6.18           | 4.53                            | 6.04                           | 5.03                               | 6.55             | 3.98                            | 8.46                            | 58.34                              | 16.74            | 16.30          | 25.57          |
| Score                   | -0.13  | -0.05   | 1.00           | -0.05            | 0.50                            | 1.00                              | 1.00                | 1.00                               | 1.00             | 1.00                               | 0.50                               | 1.00                     | -0.04                 | 1.50                                                         | 1.00           | 0.50                            | 1.00                           | 0.50                               | 0.50             | 0.50                            | 0.50                            | 1.00                               | 1.00             | 1.00           | 1.00           |
| Ion-type                |        |         | b <sub>3</sub> |                  | y <sub>4</sub> -NH <sub>3</sub> | y <sub>4</sub>                    | y <sub>5</sub>      | b <sub>+++</sub> -H <sub>2</sub> O | b <sub>+++</sub> | b <sub>+++</sub> -H <sub>2</sub> O | b <sub>+++</sub> -H <sub>2</sub> O | b <sub>+++</sub>         |                       | y <sub>7</sub>                                               | y <sub>8</sub> | b <sub>7</sub> -NH <sub>3</sub> | b <sub>7</sub>                 | b <sub>+++</sub> -H <sub>2</sub> O | b <sub>+++</sub> | y <sub>9</sub> -NH <sub>3</sub> | y <sub>9</sub> -NH <sub>3</sub> | b <sub>+++</sub> -H <sub>2</sub> O | b <sub>+++</sub> | b <sub>8</sub> | b <sub>9</sub> |
| Delta Da                |        |         | 0.47           |                  | -0.46                           | 0.56                              | 0.45                | 0.38                               | 0.44             | 0.03                               | 0.76                               | 0.43                     |                       | 0.02                                                         | 0.10           | -0.73                           | -0.06                          | 0.72                               | 0.18             | -0.76                           | 0.20                            | 0.62                               | 0.11             | 0.08           | 0.18           |
|                         |        |         |                |                  |                                 |                                   |                     | y <sub>+++</sub> <sub>13</sub>     |                  | y <sub>6</sub>                     |                                    |                          |                       | sty                                                          |                |                                 | b <sub>+++</sub> <sub>16</sub> |                                    |                  |                                 |                                 |                                    |                  |                |                |
|                         |        |         |                |                  |                                 |                                   |                     | 0.36                               |                  | 0.49                               |                                    |                          |                       | 0.70                                                         |                |                                 | 0.45                           |                                    |                  |                                 | 0.07                            |                                    |                  |                |                |



# Peak 40

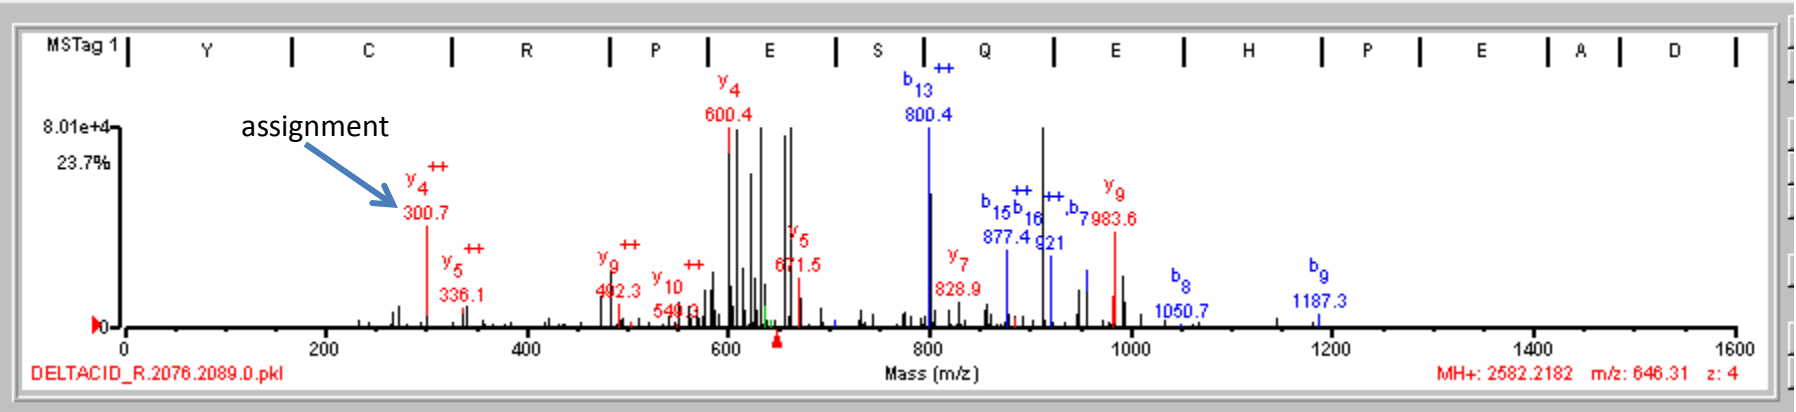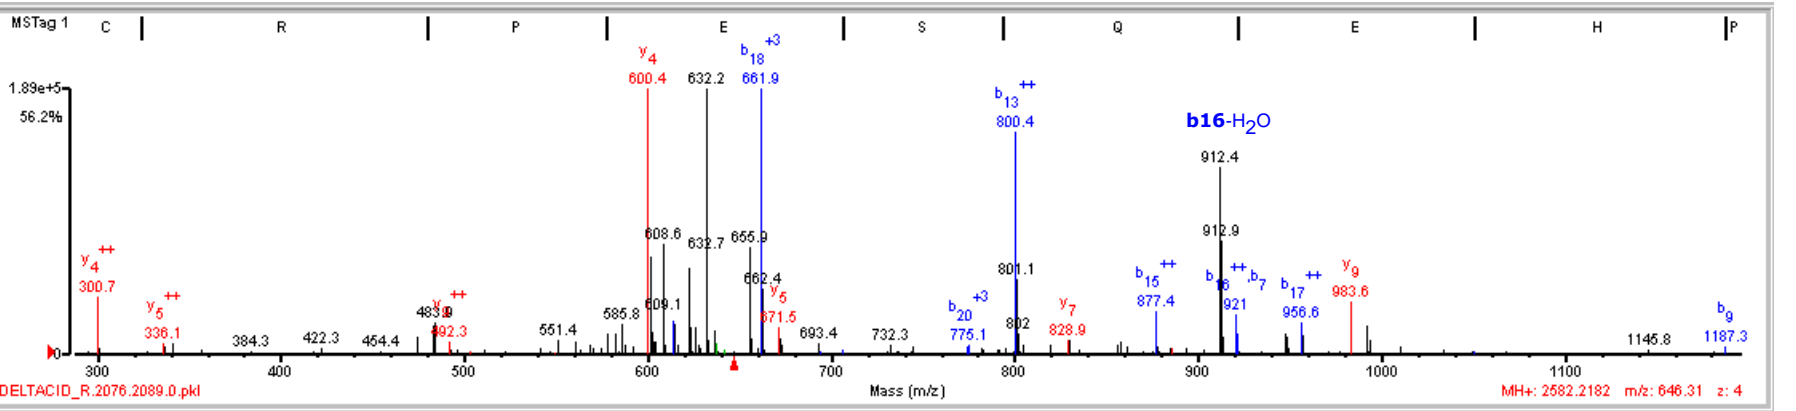

| Rank | Score | SPI (%) | BCS | # Unmatched Ions | Variable sites | Sequence                                                    | MH+ Calculated (Da) | MH+ Error (Da) | MH+ Error (ppm) | Protein MW/pI (Da) | Species      | Accession #              | MS-Digest Index #     | Protein Name                                                 |
|------|-------|---------|-----|------------------|----------------|-------------------------------------------------------------|---------------------|----------------|-----------------|--------------------|--------------|--------------------------|-----------------------|--------------------------------------------------------------|
| 1    | 14.37 | 69.5    | 8   | 6/23             | Y705y          | (K) Y C R P \E/S Q \E H P E /A/D I P G S \A/A I P Y L K (T) | 2502.14             | 80.0828        | 45.1            | 88068.3/5.94       | Homo sapiens | <a href="#">21618340</a> | <a href="#">25132</a> | signal transducer and activator of transcription 3 isoform 1 |
| 1    | 14.37 | 69.5    | 8   | 6/23             | Y705y          | (K) Y C R P \E/S Q \E H P E /A/D I P G S \A/A I P Y L K (T) | 2502.14             | 80.0828        | 45.1            | 83126.9/6.70       | Homo sapiens | <a href="#">47458820</a> | <a href="#">28398</a> | signal transducer and activator of transcription 3 isoform 3 |

  

| Fragment-ion (m/z)     | 300.68           | 483.28 | 577.93         | 585.78             | 600.39         | 608.61 | 614.44             | 622.82 | 626.43             | 632.18 | 655.86 | 661.93             | 671.51         | 800.38             | 828.92         | 856.26 | 877.40             | 912.37                               | 920.97            | 947.97                               | 956.64             | 983.63                               | 992.62             |
|------------------------|------------------|--------|----------------|--------------------|----------------|--------|--------------------|--------|--------------------|--------|--------|--------------------|----------------|--------------------|----------------|--------|--------------------|--------------------------------------|-------------------|--------------------------------------|--------------------|--------------------------------------|--------------------|
| Frac. Inten.(% of TIC) | 1.94             | 2.25   | 0.67           | 0.96               | 18.71          | 4.87   | 2.09               | 4.21   | 0.91               | 14.30  | 4.09   | 11.42              | 1.68           | 10.23              | 0.91           | 0.75   | 1.73               | 9.81                                 | 2.05              | 1.41                                 | 1.80               | 1.70                                 | 1.52               |
| Rel. Inten.(% of BP)   | 10.36            | 12.01  | 3.57           | 5.11               | 100.00         | 26.05  | 11.16              | 22.52  | 4.84               | 76.42  | 21.88  | 61.00              | 8.97           | 54.65              | 4.85           | 4.00   | 9.23               | 52.44                                | 10.96             | 7.55                                 | 9.63               | 9.07                                 | 8.12               |
| Score                  | 1.00             | -0.12  | 1.00           | 1.00               | 1.00           | -0.26  | 1.00               | -0.23  | 1.00               | -0.76  | -0.22  | 1.00               | 1.00           | 1.00               | 1.00           | -0.04  | 1.00               | 0.50                                 | 1.00              | 0.50                                 | 1.00               | 1.00                                 | 1.00               |
| Ion-type               | y <sup>++4</sup> |        | b <sub>4</sub> | b <sup>+++15</sup> | y <sub>4</sub> |        | b <sup>+++16</sup> |        | y <sup>+++17</sup> |        |        | b <sup>+++18</sup> | y <sub>5</sub> | b <sup>+++13</sup> | y <sub>7</sub> |        | b <sup>+++15</sup> | b <sup>+++16</sup> -H <sub>2</sub> O | b <sub>7</sub>    | b <sup>+++17</sup> -H <sub>2</sub> O | b <sup>+++17</sup> | b <sup>+++18</sup> -H <sub>2</sub> O | b <sup>+++18</sup> |
| Delta Da               | 0.04             |        | 0.67           | 0.53               | 0.11           |        | 0.18               |        | 0.15               |        |        | 0.32               | 0.19           | 0.05               | -0.47          |        | 0.03               | 0.49                                 | -0.42             | 0.58                                 | 0.24               | 0.72                                 | 0.70               |
|                        |                  |        |                | y <sup>++11</sup>  |                |        |                    |        |                    |        |        |                    |                |                    |                |        |                    |                                      | b <sup>++16</sup> |                                      |                    |                                      | y <sub>9</sub>     |
|                        |                  |        |                | 0.51               |                |        |                    |        |                    |        |        |                    |                |                    |                |        |                    |                                      | 0.09              |                                      |                    |                                      | 0.17               |



# Peak 42

Ions that verify assignment

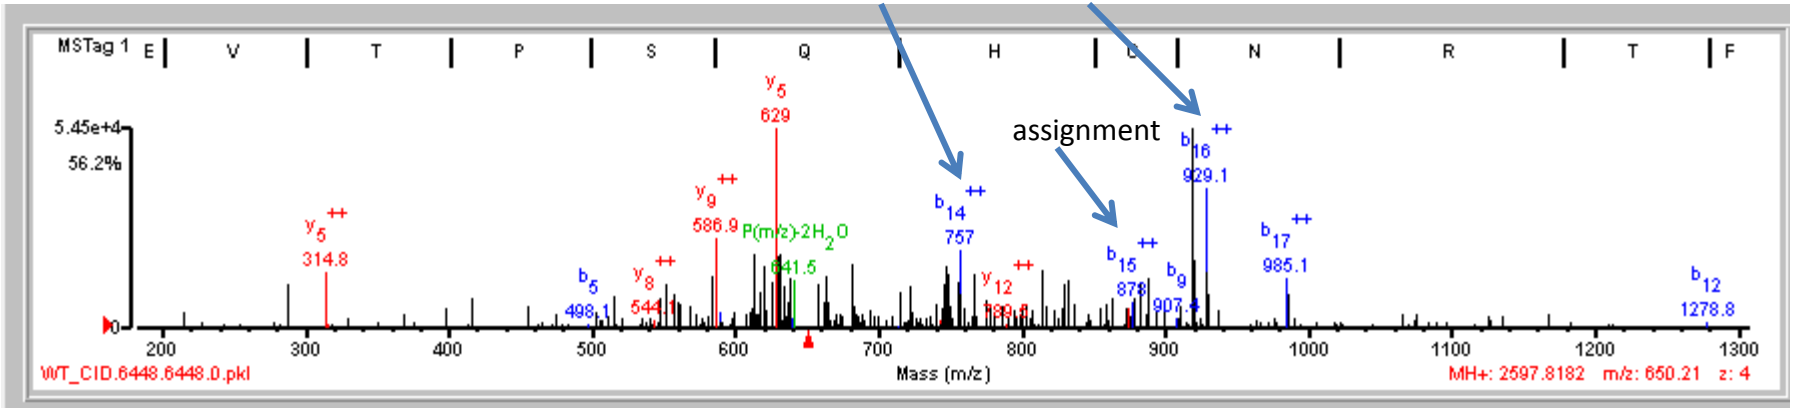

| Rank | Score | SPI (%) | BCS | Unmatched Ions | Variable sites | Sequence                                          | Calculated (Da) | Error (Da) | Error (ppm) | MW/pI (Da)   | Species      | Accession #              | MS-Digest Index #    | Protein Name                        |
|------|-------|---------|-----|----------------|----------------|---------------------------------------------------|-----------------|------------|-------------|--------------|--------------|--------------------------|----------------------|-------------------------------------|
| 1    | 11.63 | 73.1    | 7   | 10/24          | Y54y           | (K)A E V/T P S Q H/G N R T F/S\Y\T\LE D H T K (Q) | 2518.20         | 79.6225    | -132.4      | 69666.7/6.00 | Homo sapiens | <a href="#">22027642</a> | <a href="#">4573</a> | kelch-like ECH-associated protein 1 |
| 1    | 11.63 | 73.1    | 7   | 10/24          | Y54y           | (K)A E V/T P S Q H/G N R T F/S\Y\T\LE D H T K (Q) | 2518.20         | 79.6225    | -132.4      | 69666.7/6.00 | Homo sapiens | <a href="#">45269145</a> | <a href="#">5134</a> | kelch-like ECH-associated protein 1 |

  

| Fragment-ion (m/z)     | 314.76           | 560.42 | 583.75             | 586.91           | 614.06 | 619.85             | 625.97 | 629.01         | 638.24 | 664.07 | 682.43 | 722.66 | 747.67                              | 755.46 | 757.00            | 767.11             | 814.72 | 832.04                           | 877.95            | 882.68 | 888.00 | 919.79                              | 929.13            | 985.09            |
|------------------------|------------------|--------|--------------------|------------------|--------|--------------------|--------|----------------|--------|--------|--------|--------|-------------------------------------|--------|-------------------|--------------------|--------|----------------------------------|-------------------|--------|--------|-------------------------------------|-------------------|-------------------|
| Frac. Inten.(% of TIC) | 2.28             | 2.11   | 1.95               | 4.53             | 4.11   | 2.50               | 0.07   | 19.60          | 2.27   | 1.96   | 4.29   | 2.21   | 5.61                                | 2.23   | 4.20              | 3.85               | 2.51   | 1.97                             | 2.42              | 2.68   | 2.51   | 12.34                               | 8.59              | 3.20              |
| Rel. Inten.(% of BP)   | 11.63            | 10.76  | 9.93               | 23.12            | 20.98  | 12.75              | 0.35   | 100.00         | 11.58  | 10.00  | 21.91  | 11.29  | 28.61                               | 11.40  | 21.43             | 19.66              | 12.79  | 10.05                            | 12.35             | 13.69  | 12.82  | 62.94                               | 43.83             | 16.33             |
| Score                  | 1.00             | -0.11  | 1.00               | 1.00             | -0.21  | 1.00               | 1.50   | 1.00           | -0.12  | -0.10  | -0.22  | -0.11  | 0.50                                | -0.11  | 1.00              | 1.00               | -0.13  | 0.50                             | 1.00              | -0.14  | -0.13  | 0.50                                | 1.00              | 1.00              |
| Ion-type               | y <sup>++5</sup> |        | y <sup>+++14</sup> | y <sup>++9</sup> |        | b <sup>+++16</sup> | sty    | y <sup>5</sup> |        |        |        |        | b <sup>++14</sup> -H <sub>2</sub> O |        | b <sup>++14</sup> | y <sup>+++19</sup> |        | b <sup>8</sup> -H <sub>2</sub> O | b <sup>++15</sup> |        |        | b <sup>++16</sup> -H <sub>2</sub> O | b <sup>++16</sup> | b <sup>++17</sup> |
| Delta Da               | -0.39            |        | 0.16               | -0.33            |        | 0.25               | 0.17   | -0.28          |        |        |        |        | -0.19                               |        | 0.14              | 0.10               |        | -0.35                            | -0.43             |        |        | -0.11                               | 0.23              | -0.35             |

# Peak 43

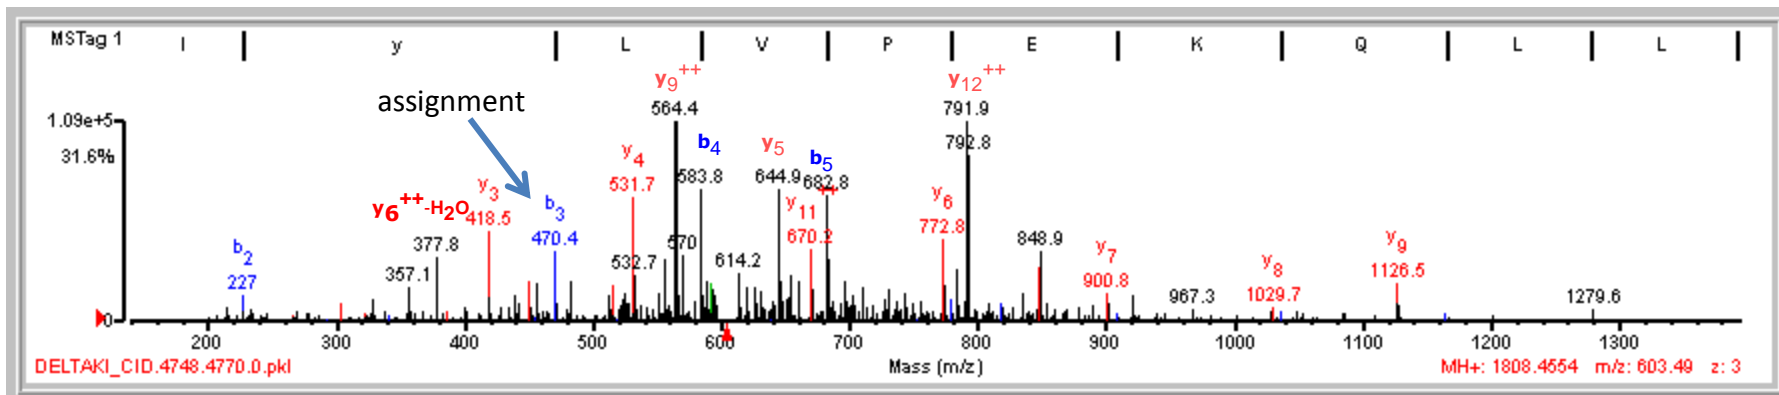

| Rank | Score | SPI (%) | BCS | # Unmatched Ions | Variable sites | Sequence                         | MH <sup>+</sup> Calculated (Da) | MH <sup>+</sup> Error (Da) | MH <sup>+</sup> Error (ppm) | Protein MW/pI (Da) | Species      | Accession #              | MS-Digest Index #     | Protein Name            |
|------|-------|---------|-----|------------------|----------------|----------------------------------|---------------------------------|----------------------------|-----------------------------|--------------------|--------------|--------------------------|-----------------------|-------------------------|
| 1    | 13.55 | 83.3    | 10  | 9/24             | Y552y          | (K) L/I/y L\VIPE/K/Q/L/LINER (I) | 1728.01                         | 80.4500                    | 267.5                       | 141689.5/7.77      | Homo sapiens | <a href="#">22325383</a> | <a href="#">5213</a>  | intersectin 2 isoform 2 |
| 1    | 13.55 | 83.3    | 10  | 9/24             | Y552y          | (K) L/I/y L\VIPE/K/Q/L/LINER (I) | 1728.01                         | 80.4500                    | 267.5                       | 190365.7/8.42      | Homo sapiens | <a href="#">22325381</a> | <a href="#">25905</a> | intersectin 2 isoform 3 |
| 1    | 13.55 | 83.3    | 10  | 9/24             | Y552y          | (K) L/I/y L\VIPE/K/Q/L/LINER (I) | 1728.01                         | 80.4500                    | 267.5                       | 193331.3/8.32      | Homo sapiens | <a href="#">22325385</a> | <a href="#">27225</a> | intersectin 2 isoform 1 |

  

| Fragment-ion (m/z)      | 377.82 | 418.49         | 450.99                       | 470.45         | 525.23 | 531.70         | 555.89         | 564.35                       | 569.95 | 583.80         | 589.05 | 593.10 | 594.73 | 614.16         | 644.94                        | 670.18         | 682.82                        | 696.52 | 743.06         | 772.79 | 783.56 | 791.87                        | 847.94                        | 1126.53        |
|-------------------------|--------|----------------|------------------------------|----------------|--------|----------------|----------------|------------------------------|--------|----------------|--------|--------|--------|----------------|-------------------------------|----------------|-------------------------------|--------|----------------|--------|--------|-------------------------------|-------------------------------|----------------|
| Frac. Inten. (% of TIC) | 1.73   | 2.53           | 1.44                         | 2.42           | 1.54   | 4.22           | 2.60           | 20.36                        | 2.67   | 3.93           | 1.47   | 1.65   | 1.42   | 2.92           | 4.64                          | 3.02           | 4.81                          | 1.41   | 1.45           | 2.77   | 1.86   | 23.89                         | 3.30                          | 1.94           |
| Rel. Inten. (% of BP)   | 7.26   | 10.58          | 6.04                         | 10.12          | 6.43   | 17.67          | 10.88          | 85.21                        | 11.17  | 16.43          | 6.17   | 6.91   | 5.94   | 12.22          | 19.41                         | 12.64          | 20.13                         | 5.92   | 6.06           | 11.61  | 7.80   | 100.00                        | 13.82                         | 8.11           |
| Score                   | -0.07  | 1.00           | 1.00                         | 1.00           | -0.06  | 1.00           | 0.25           | 1.00                         | -0.11  | 1.00           | -0.06  | -0.07  | -0.06  | -0.12          | 1.00                          | 1.00           | 1.00                          | 1.00   | -0.06          | 1.00   | -0.08  | 1.00                          | 1.00                          | 1.00           |
| Ion-type                |        | y <sub>3</sub> | y <sup>++</sup> <sub>7</sub> | b <sub>3</sub> |        | y <sub>4</sub> | a <sub>4</sub> | y <sup>++</sup> <sub>9</sub> |        | b <sub>4</sub> |        |        |        | y <sub>5</sub> | y <sup>++</sup> <sub>11</sub> | b <sub>5</sub> | b <sup>++</sup> <sub>11</sub> |        | y <sub>6</sub> |        |        | y <sup>++</sup> <sub>12</sub> | y <sup>++</sup> <sub>13</sub> | y <sub>9</sub> |
| Delta Da                |        | 0.29           | 0.22                         | 0.24           |        | 0.41           | 0.60           | 0.54                         |        | 0.51           |        |        |        | 0.57           | 0.29                          | 0.46           | 0.63                          |        | 0.36           |        |        | 0.46                          | -0.01                         | -0.09          |

# Peak 44

Ions that verify assignment

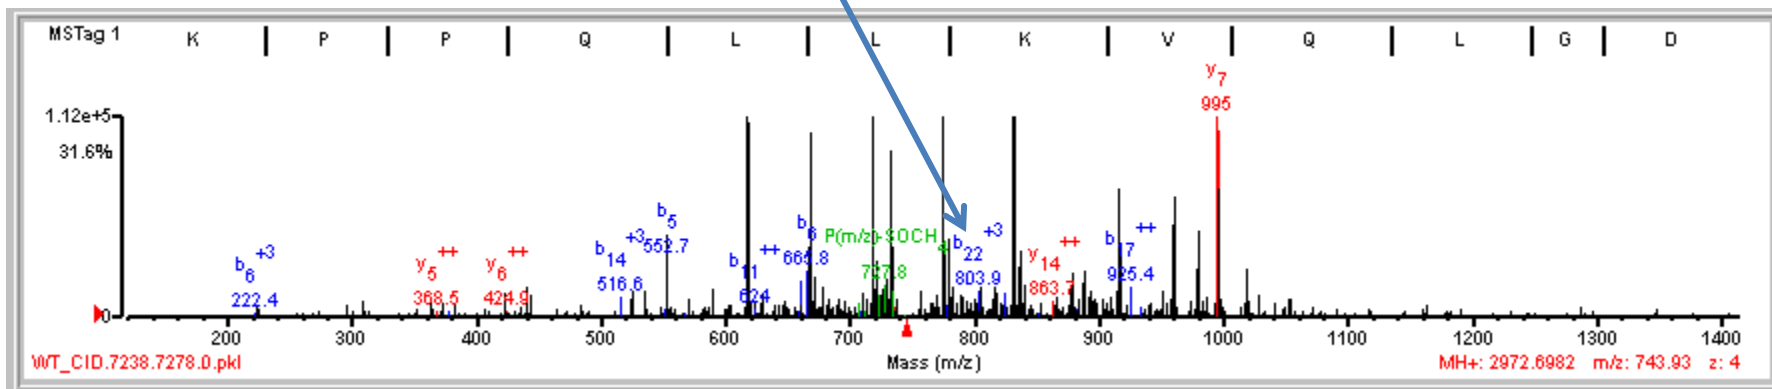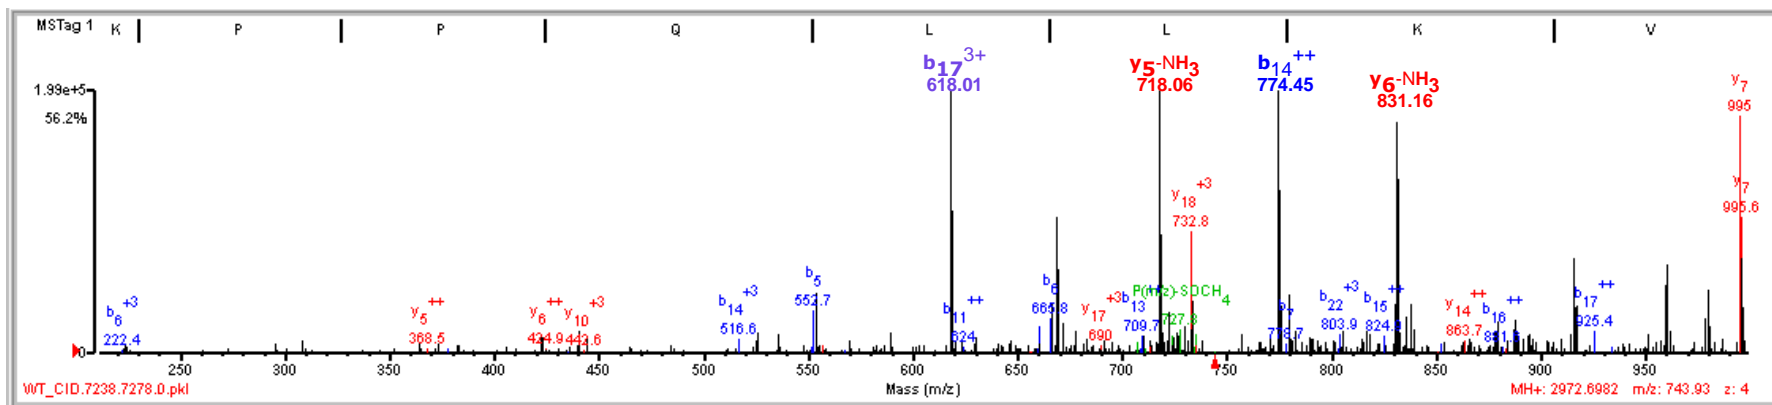

| Rank                    | Score  | SPI (%)        | BCS            | # Unmatched Ions | Variable sites    | Sequence                                                  | MH <sup>+</sup> Calculated (Da) | MH <sup>+</sup> Error (Da) | MH <sup>+</sup> Error (ppm) | Protein MW/pl (Da) | Species      | Accession #              | MS-Digest Index #     | Protein Name                    |                 |        |        |                                  |                 |        |        |        |                |                |         |
|-------------------------|--------|----------------|----------------|------------------|-------------------|-----------------------------------------------------------|---------------------------------|----------------------------|-----------------------------|--------------------|--------------|--------------------------|-----------------------|---------------------------------|-----------------|--------|--------|----------------------------------|-----------------|--------|--------|--------|----------------|----------------|---------|
| 1                       | 11.83  | 75.3           | 9              | 11/25            | M367m M371m Y372y | (R) T K/P P Q/L/L/K V Q L G/D Q/T D S/K/m L L G/m Y R (C) | 2860.54                         | 112.1558                   | 67.2                        | 632823.3/5.46      | Homo sapiens | <a href="#">24415404</a> | <a href="#">17305</a> | MDN1, midasin homolog           |                 |        |        |                                  |                 |        |        |        |                |                |         |
| Fragment-ion (m/z)      | 422.50 | 552.68         | 618.01         | 665.78           | 668.54            | 718.06                                                    | 722.43                          | 727.26                     | 732.76                      | 774.45             | 779.69       | 789.83                   | 803.88                | 816.92                          | 831.16          | 836.05 | 838.00 | 879.50                           | 888.09          | 915.95 | 959.65 | 979.75 | 994.96         | 995.24         | 1019.54 |
| Frac. Inten. (% of TIC) | 1.05   | 2.50           | 14.82          | 2.01             | 6.53              | 9.63                                                      | 2.21                            | 0.03                       | 3.06                        | 10.11              | 2.09         | 1.07                     | 1.31                  | 1.21                            | 9.15            | 1.04   | 1.38   | 1.73                             | 1.43            | 4.15   | 3.91   | 2.11   | 4.96           | 11.09          | 1.43    |
| Rel. Inten. (% of BP)   | 7.08   | 16.88          | 100.00         | 13.55            | 44.07             | 64.96                                                     | 14.93                           | 0.21                       | 20.66                       | 68.22              | 14.14        | 7.20                     | 8.82                  | 8.20                            | 61.72           | 6.99   | 9.35   | 11.67                            | 9.67            | 27.99  | 26.36  | 14.25  | 33.44          | 74.81          | 9.67    |
| Score                   | -0.07  | 1.00           | 1.00           | 1.00             | -0.44             | 0.50                                                      | -0.15                           | 2.00                       | 1.00                        | 1.00               | -0.14        | -0.07                    | 1.00                  | -0.08                           | 0.50            | 1.00   | -0.09  | -0.12                            | 0.50            | 1.00   | -0.26  | -0.14  | 1.00           | 1.00           | -0.10   |
| Ion-type                |        | b <sub>6</sub> | b <sub>5</sub> | b <sub>6</sub>   | b <sub>6</sub>    | y <sub>5</sub> -NH <sub>3</sub>                           |                                 | m                          | y <sub>18</sub>             | b <sub>14</sub>    |              |                          | b <sub>22</sub>       | y <sub>6</sub> -NH <sub>3</sub> | y <sub>13</sub> |        |        | b <sub>6</sub> -H <sub>2</sub> O | y <sub>23</sub> |        |        |        | Y <sub>7</sub> | Y <sub>7</sub> |         |
| Delta Da                |        | 0.37           | 0.67           | 0.38             |                   | -0.20                                                     |                                 | -0.62                      | 0.41                        | 0.50               |              |                          | 0.43                  |                                 | -0.19           | 0.70   |        | -0.48                            | 0.83            |        |        |        | -0.45          | -0.17          |         |

# Peak 45

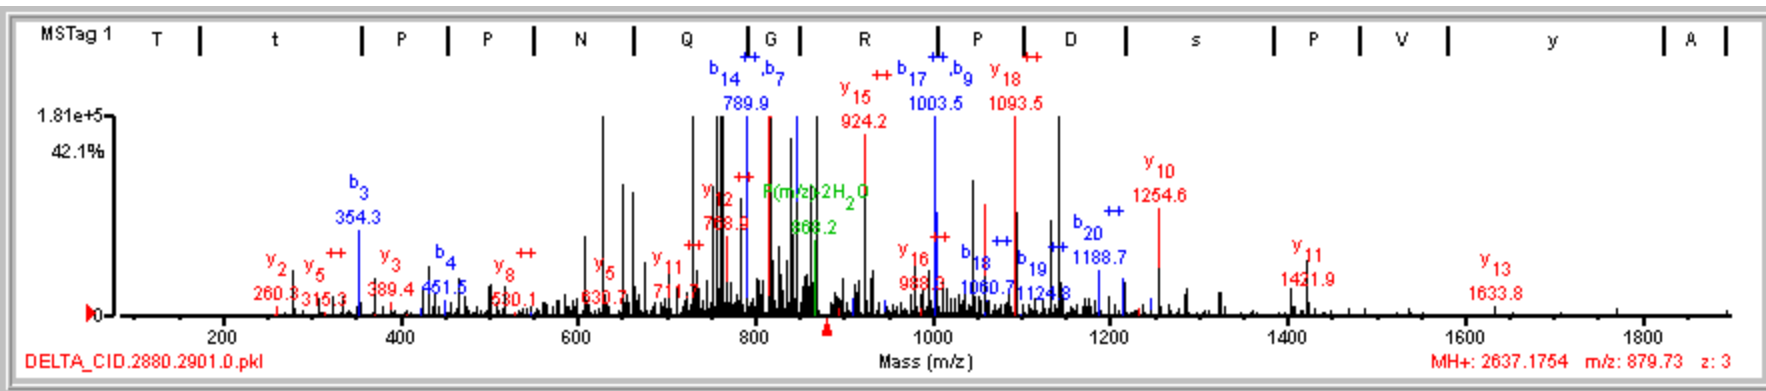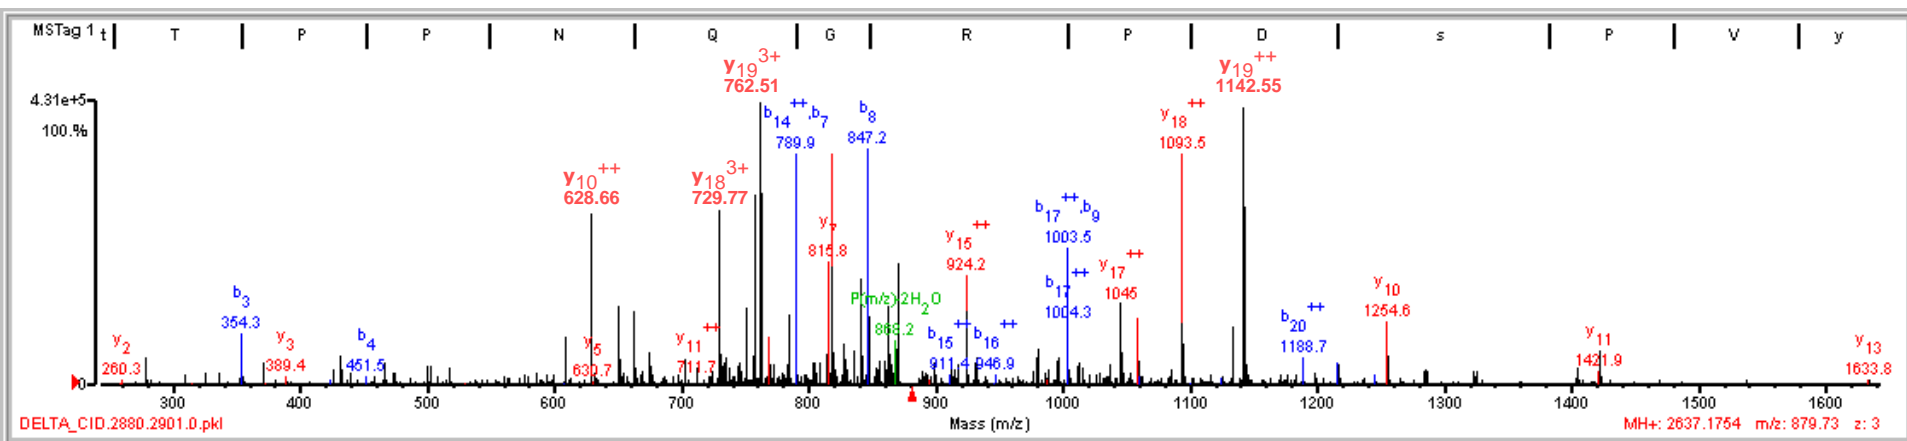

| Rank                    | Score  | SPI (%) | BCS            | # Unmatched Ions               | Variable sites    | Sequence                                              | MH <sup>+</sup> Calculated (Da) | MH <sup>+</sup> Error (Da)     | MH <sup>+</sup> Error (ppm) | Protein MW/pi (Da)             | Species        | Accession #                    | MS-Digest Index # | Protein Name                     |                |        |        |                                |                |                                |                |                                |                                                  |                                |                 |
|-------------------------|--------|---------|----------------|--------------------------------|-------------------|-------------------------------------------------------|---------------------------------|--------------------------------|-----------------------------|--------------------------------|----------------|--------------------------------|-------------------|----------------------------------|----------------|--------|--------|--------------------------------|----------------|--------------------------------|----------------|--------------------------------|--------------------------------------------------|--------------------------------|-----------------|
| 1                       | 15.34  | 77.7    | 11             | 7/25                           | T230t Y243y S240s | (R) A t T/P/P/N/Q/G/R/P/D s/P V I y/A N/L Q E L K (I) | 2396.22                         | 240.9550                       | 400.4                       | 96254.9/7.29                   | Homo sapiens   | 26986534                       | 7889              | Rho GTPase activating protein 12 |                |        |        |                                |                |                                |                |                                |                                                  |                                |                 |
| Fragment-ion (m/z)      | 628.66 | 651.02  | 663.05         | 729.77                         | 751.94            | 757.53                                                | 762.51                          | 768.87                         | 784.43                      | 789.90                         | 815.83         | 817.76                         | 835.47            | 841.14                           | 847.16         | 862.58 | 870.77 | 924.22                         | 1003.51        | 1045.04                        | 1058.65        | 1093.53                        | 1133.78                                          | 1142.55                        | 1254.58         |
| Frac. Inten. (% of TIC) | 4.87   | 2.41    | 2.36           | 5.85                           | 1.78              | 4.54                                                  | 10.30                           | 1.77                           | 2.82                        | 6.93                           | 2.73           | 8.27                           | 0.05              | 0.12                             | 0.19           | 3.24   | 2.60   | 4.16                           | 4.61           | 4.26                           | 2.36           | 8.29                           | 1.75                                             | 11.64                          | 2.08            |
| Rel. Inten. (% of BP)   | 41.88  | 20.71   | 20.25          | 50.27                          | 15.32             | 39.03                                                 | 88.53                           | 15.21                          | 24.26                       | 59.54                          | 23.46          | 71.04                          | 0.45              | 1.02                             | 1.65           | 27.80  | 22.32  | 35.73                          | 39.64          | 36.61                          | 20.27          | 71.18                          | 15.05                                            | 100.00                         | 17.86           |
| Score                   | -0.42  | -0.21   | 1.00           | 1.00                           | -0.15             | -0.39                                                 | 1.00                            | 1.00                           | 1.00                        | 1.00                           | 1.00           | 1.00                           | 1.00              | 0.25                             | 1.00           | -0.28  | -0.22  | 1.00                           | 1.00           | 1.00                           | 1.00           | 1.00                           | 0.50                                             | 1.00                           | 1.00            |
| Ion-type                |        |         | b <sub>3</sub> | y <sup>+++</sup> <sub>18</sub> |                   |                                                       | a <sub>7</sub>                  | y <sup>+++</sup> <sub>12</sub> |                             | b <sub>7</sub>                 | y <sub>7</sub> | y <sup>+++</sup> <sub>13</sub> | st                | st                               | b <sub>3</sub> |        |        | y <sup>+++</sup> <sub>15</sub> | b <sub>9</sub> | y <sup>+++</sup> <sub>17</sub> | y <sub>8</sub> | y <sup>+++</sup> <sub>18</sub> | y <sup>+++</sup> <sub>19</sub> -H <sub>2</sub> O | y <sup>+++</sup> <sub>19</sub> | Y <sub>10</sub> |
| Delta Da                |        |         | 0.80           | 0.44                           |                   |                                                       | 0.19                            | 0.05                           |                             | -0.41                          | 0.37           | 0.41                           |                   | 0.42                             | -0.17          |        |        | 0.07                           | 0.08           | 0.16                           | 0.04           | 0.77                           | 0.54                                             | -0.03                          |                 |
|                         |        |         |                |                                |                   |                                                       | y <sup>+++</sup> <sub>19</sub>  |                                |                             | b <sup>+++</sup> <sub>14</sub> |                |                                |                   |                                  | sty            |        |        | b <sup>+++</sup> <sub>17</sub> |                |                                |                |                                |                                                  |                                |                 |
|                         |        |         |                |                                |                   |                                                       | 0.83                            |                                |                             | 0.08                           |                |                                |                   |                                  | 0.44           |        |        | -0.37                          |                |                                |                |                                |                                                  |                                |                 |



# Peak 48

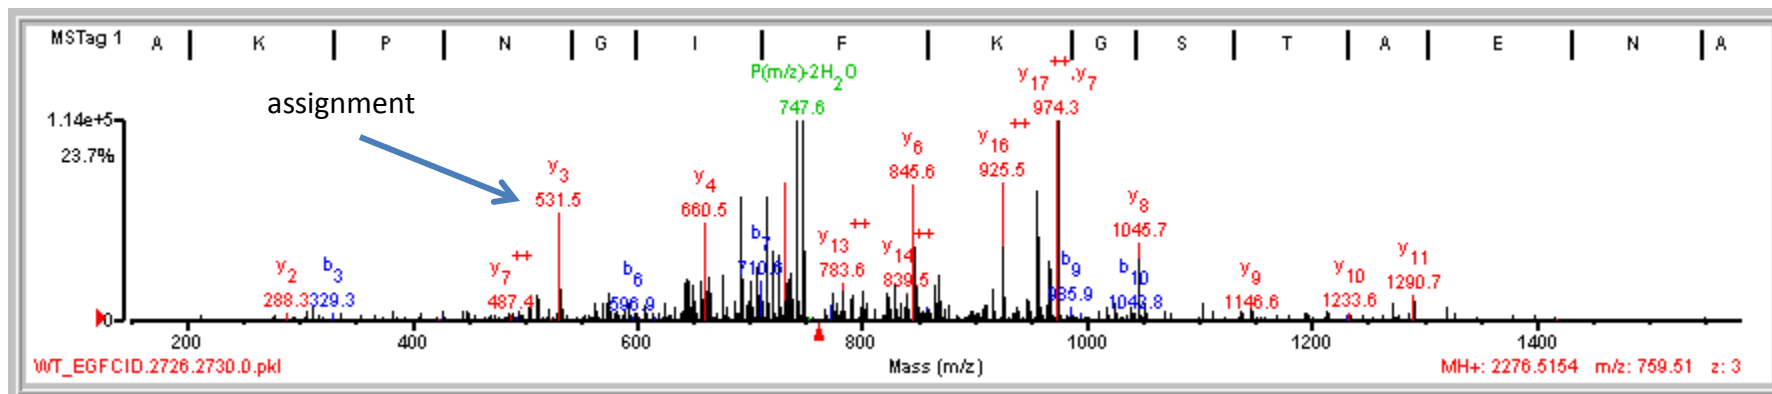

## Detailed Results

| Rank                    | Score          | SPI (%)                          | BCS            | # Unmatched Ions | Variable sites | Sequence                                      | MH <sup>+</sup> Calculated (Da)                  | MH <sup>+</sup> Error (Da) | MH <sup>+</sup> Error (ppm)    | Protein MW/pl (Da) | Species        | Accession #              | MS-Digest Index #    | Protein Name                               |                 |                                 |                                  |                |                 |                 |                                 |        |                 |                |                 |
|-------------------------|----------------|----------------------------------|----------------|------------------|----------------|-----------------------------------------------|--------------------------------------------------|----------------------------|--------------------------------|--------------------|----------------|--------------------------|----------------------|--------------------------------------------|-----------------|---------------------------------|----------------------------------|----------------|-----------------|-----------------|---------------------------------|--------|-----------------|----------------|-----------------|
| 1                       | 16.02          | 73.9                             | 12             | 6/25             | Y1197y         | (K)E/A/R/P/N/G/I/F/K/G/S/T/A/E/N/A/E/Y/L/R(V) | 2195.11                                          | 81.4063                    | 632.5                          | 134278.3/6.26      | Homo sapiens   | <a href="#">29725609</a> | <a href="#">2364</a> | epidermal growth factor receptor isoform a |                 |                                 |                                  |                |                 |                 |                                 |        |                 |                |                 |
| Fragment-ion (m/z)      | 531.51         | 642.36                           | 660.48         | 664.69           | 675.69         | 692.70                                        | 707.11                                           | 710.65                     | 716.49                         | 720.86             | 726.95         | 731.54                   | 736.22               | 741.59                                     | 783.63          | 828.65                          | 839.46                           | 845.63         | 869.16          | 925.50          | 956.61                          | 966.33 | 974.32          | 1045.68        | 1290.73         |
| Frac. Inten. (% of TIC) | 3.23           | 2.48                             | 3.29           | 2.00             | 1.80           | 4.11                                          | 2.18                                             | 1.97                       | 3.80                           | 3.50               | 0.06           | 5.41                     | 3.11                 | 12.12                                      | 2.28            | 1.65                            | 2.24                             | 4.97           | 2.01            | 5.41            | 6.05                            | 3.58   | 17.67           | 3.41           | 1.67            |
| Rel. Inten. (% of BP)   | 18.30          | 14.05                            | 18.59          | 11.30            | 10.20          | 23.24                                         | 12.35                                            | 11.12                      | 21.51                          | 19.83              | 0.33           | 30.62                    | 17.61                | 68.62                                      | 12.89           | 9.35                            | 12.66                            | 28.14          | 11.39           | 30.63           | 34.22                           | 20.25  | 100.00          | 19.29          | 9.47            |
| Score                   | 1.00           | 0.50                             | 1.00           | -0.11            | -0.10          | 1.00                                          | 0.50                                             | 1.00                       | 1.00                           | -0.20              | 1.50           | 1.00                     | -0.18                | -0.69                                      | 1.00            | 0.50                            | 1.00                             | 1.00           | 1.00            | 1.00            | 0.50                            | -0.20  | 1.00            | 1.00           | 1.00            |
| Ion-type                | y <sub>3</sub> | y <sub>4</sub> -H <sub>2</sub> O | y <sub>4</sub> |                  |                | b <sub>7</sub> -NH <sub>3</sub>               | b <sub>7</sub> + <sub>14</sub> -H <sub>2</sub> O | b <sub>7</sub>             | b <sub>7</sub> + <sub>14</sub> | sty                | y <sub>5</sub> |                          |                      |                                            | y <sub>13</sub> | y <sub>6</sub> -NH <sub>3</sub> | b <sub>6</sub> -H <sub>2</sub> O | y <sub>6</sub> | y <sub>15</sub> | y <sub>16</sub> | y <sub>7</sub> -NH <sub>3</sub> |        | y <sub>7</sub>  | y <sub>8</sub> | y <sub>11</sub> |
| Delta Da                | 0.28           | 0.10                             | 0.20           |                  |                | -0.66                                         | 0.25                                             | 0.27                       | 0.62                           | 0.58               | 0.23           |                          |                      | 0.28                                       | 0.32            | 0.02                            | 0.27                             | 0.75           | 0.07            | -0.76           |                                 | -0.08  | 0.24            | 0.19           |                 |
|                         |                |                                  |                |                  |                | y <sub>18</sub>                               |                                                  | y <sub>19</sub>            |                                |                    |                |                          |                      |                                            |                 |                                 | y <sub>14</sub>                  |                |                 |                 |                                 |        | y <sub>17</sub> |                |                 |
|                         |                |                                  |                |                  |                | 0.36                                          |                                                  | 0.47                       |                                |                    |                |                          |                      |                                            |                 |                                 | -0.44                            |                |                 |                 |                                 |        | 0.37            |                |                 |







# Peak 51

Ions that verify assignment

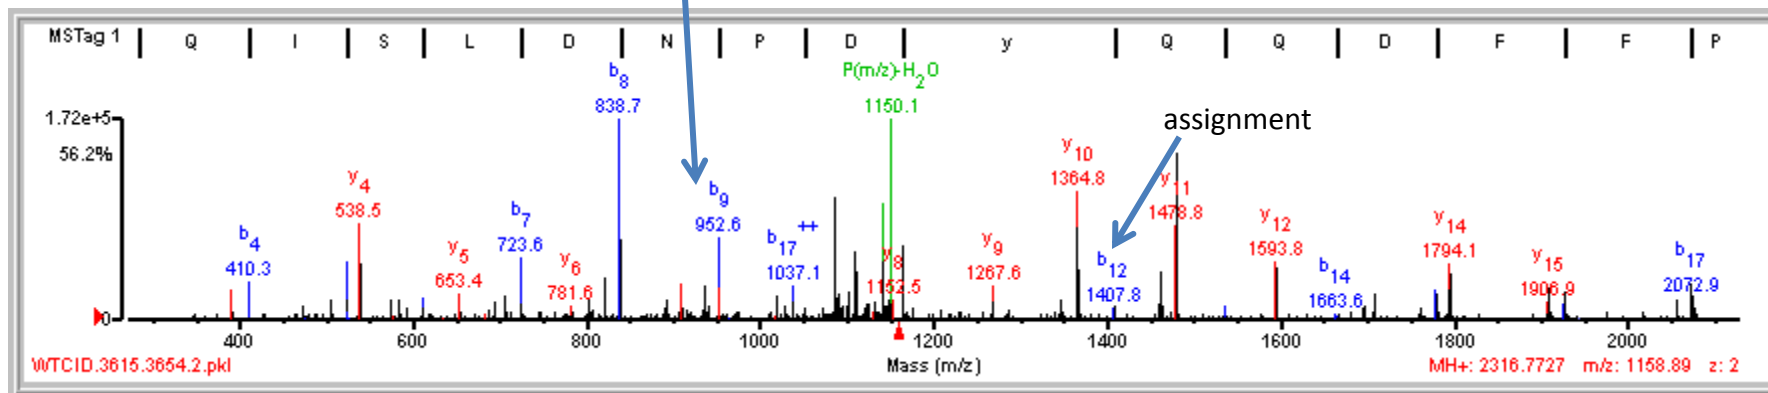

| Rank                    | Score          | SPI (%)        | BCS                              | # Unmatched Ions | Variable sites                   | Sequence                                       | MH* Calculated (Da) | MH* Error (Da) | MH* Error (ppm)               | Protein MW/pl (Da) | Species         | Accession #    | MS-Digest Index #                 | Protein Name                               |                                  |                 |         |         |                 |         |         |         |         |         |         |
|-------------------------|----------------|----------------|----------------------------------|------------------|----------------------------------|------------------------------------------------|---------------------|----------------|-------------------------------|--------------------|-----------------|----------------|-----------------------------------|--------------------------------------------|----------------------------------|-----------------|---------|---------|-----------------|---------|---------|---------|---------|---------|---------|
| 1                       | 14.24          | 75.4           | 9                                | 7/25             | Y1172y                           | (K)G S/B Q I S L D N I P/D/Y/Q Q D/F P P K (E) | 2236.03             | 80.7422        | 334.9                         | 134278.3/6.26      | Homo sapiens    | 29725609       | 2364                              | epidermal growth factor receptor isoform a |                                  |                 |         |         |                 |         |         |         |         |         |         |
| Fragment-ion (m/z)      | 523.37         | 538.49         | 705.54                           | 723.56           | 820.49                           | 838.66                                         | 909.63              | 952.61         | 1087.03                       | 1110.15            | 1165.29         | 1267.64        | 1346.49                           | 1364.75                                    | 1461.80                          | 1478.77         | 1479.62 | 1593.83 | 1779.62         | 1794.11 | 1795.78 | 1909.56 | 1926.98 | 2073.88 | 2075.52 |
| Frac. Inten. (% of TIC) | 3.15           | 5.45           | 2.05                             | 3.07             | 2.75                             | 10.68                                          | 2.06                | 4.32           | 6.40                          | 0.15               | 3.71            | 2.90           | 2.13                              | 10.88                                      | 3.18                             | 3.27            | 10.70   | 5.55    | 2.29            | 3.72    | 2.92    | 2.20    | 2.22    | 2.05    | 2.21    |
| Rel. Inten. (% of BP)   | 28.98          | 50.06          | 18.83                            | 28.25            | 25.24                            | 98.10                                          | 18.89               | 39.66          | 58.83                         | 1.37               | 34.09           | 26.64          | 19.53                             | 100.00                                     | 29.20                            | 30.03           | 98.32   | 51.01   | 21.05           | 34.22   | 26.83   | 20.25   | 20.38   | 18.86   | 20.30   |
| Score                   | 1.00           | 1.00           | 0.50                             | 1.00             | 0.50                             | 1.00                                           | 1.00                | 1.00           | 1.00                          | 1.50               | 1.00            | 1.00           | 0.50                              | 1.00                                       | 0.50                             | 1.00            | -0.98   | 1.00    | -0.21           | 1.00    | -0.27   | -0.20   | -0.20   | -0.19   | -0.20   |
| Ion-type                | b <sub>5</sub> | y <sub>4</sub> | b <sub>7</sub> -H <sub>2</sub> O | b <sub>7</sub>   | b <sub>8</sub> -H <sub>2</sub> O | b <sub>8</sub>                                 | y <sub>7</sub>      | b <sub>9</sub> | y <sup>++</sup> <sub>17</sub> | sty                | b <sub>11</sub> | y <sub>9</sub> | y <sub>10</sub> -H <sub>2</sub> O | y <sub>10</sub>                            | y <sub>11</sub> -NH <sub>3</sub> | y <sub>11</sub> |         |         | y <sub>12</sub> |         |         |         |         |         |         |
| Delta Da                | 0.11           | 0.19           | 0.17                             | 0.18             | 0.10                             | 0.25                                           | 0.18                | 0.16           | 0.55                          | 0.64               | 0.76            | 0.14           | -0.06                             | 0.19                                       | 0.23                             | 0.17            |         | 0.20    |                 |         |         |         |         |         |         |



# Peak 53

Ions that verify assignment

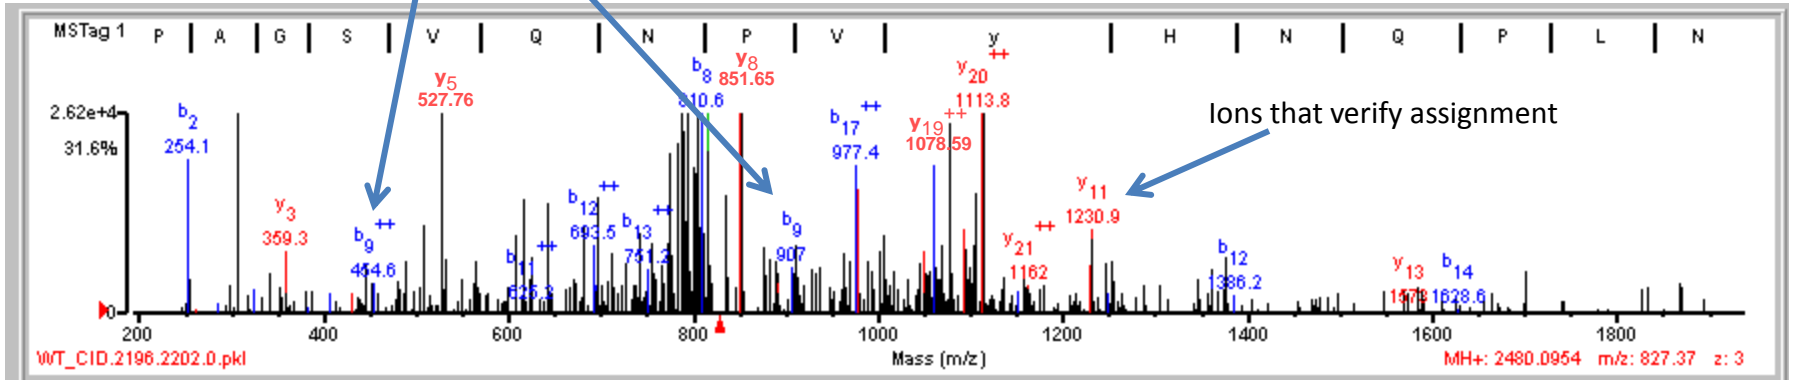

| Rank                    | Score          | SPI (%) | BCS            | # Unmatched ions              | Variable sites | Sequence                                          | MH <sup>+</sup> Calculated (Da) | MH <sup>+</sup> Error (Da) | MH <sup>+</sup> Error (ppm) | Protein MW/pI (Da) | Species      | Accession # | MS-Digest Index # | Protein Name                               |                |                                |                |                 |                               |                               |                 |                               |                               |                               |                                                                       |
|-------------------------|----------------|---------|----------------|-------------------------------|----------------|---------------------------------------------------|---------------------------------|----------------------------|-----------------------------|--------------------|--------------|-------------|-------------------|--------------------------------------------|----------------|--------------------------------|----------------|-----------------|-------------------------------|-------------------------------|-----------------|-------------------------------|-------------------------------|-------------------------------|-----------------------------------------------------------------------|
| 1                       | 17.19          | 78.6    | 12             | 5/24                          | Y1110y         | (K)R/P/A/G/S/V/Q/N/P/V/Y/H/N/Q/P/L/N/P/A/P/S/R(D) | 2399.23                         | 80.8627                    | 361.4                       | 134278.3/6.26      | Homo sapiens | 29725609    | 2364              | epidermal growth factor receptor isoform a |                |                                |                |                 |                               |                               |                 |                               |                               |                               |                                                                       |
| Fragment-ion (m/z)      | 254.11         | 307.30  | 527.76         | 616.29                        | 641.95         | 775.57                                            | 783.06                          | 789.08                     | 794.90                      | 800.77             | 806.42       | 809.60      | 810.65            | 835.87                                     | 851.65         | 977.40                         | 979.54         | 1006.79         | 1061.07                       | 1078.59                       | 1093.54         | 1113.80                       | 1114.10                       | 1230.90                       |                                                                       |
| Frac. Inten. (% of TIC) | 2.68           | 4.14    | 5.87           | 2.60                          | 3.31           | 4.49                                              | 3.83                            | 7.87                       | 0.35                        | 2.25               | 4.89         | 2.22        | 4.81              | 2.11                                       | 13.66          | 2.54                           | 2.29           | 3.20            | 3.90                          | 4.45                          | 2.52            | 3.09                          | 9.87                          | 3.03                          |                                                                       |
| Rel. Inten. (% of BP)   | 19.62          | 30.33   | 42.98          | 19.02                         | 24.25          | 32.88                                             | 28.05                           | 57.61                      | 2.58                        | 16.46              | 35.80        | 16.27       | 35.19             | 15.43                                      | 100.00         | 18.58                          | 16.76          | 23.44           | 28.53                         | 32.60                         | 18.46           | 22.64                         | 72.23                         | 22.18                         |                                                                       |
| Score                   | 1.00           | -0.30   | 1.00           | 1.00                          | 1.00           | 1.00                                              | 1.00                            | 0.25                       | -0.58                       | 1.50               | -0.16        | -0.36       | -0.16             | 1.00                                       | 1.00           | 1.00                           | 1.00           | 1.00            | 1.00                          | 1.00                          | 1.00            | 1.00                          | 1.00                          | 1.00                          |                                                                       |
| Ion-type                | b <sub>2</sub> |         | y <sub>5</sub> | y <sup>++</sup> <sub>11</sub> | y <sub>8</sub> | y <sup>+++</sup> <sub>21</sub>                    | a <sub>8</sub>                  |                            | sty                         |                    |              |             | b <sub>8</sub>    | y <sup>++</sup> <sub>14</sub>              | y <sub>8</sub> | b <sup>+++</sup> <sub>17</sub> | y <sub>9</sub> | b <sub>10</sub> | b <sup>++</sup> <sub>19</sub> | y <sup>++</sup> <sub>19</sub> | y <sub>10</sub> | y <sup>++</sup> <sub>20</sub> | y <sup>++</sup> <sub>20</sub> | b <sup>++</sup> <sub>22</sub> |                                                                       |
| Delta Da                | -0.05          |         | 0.47           | 0.47                          | 0.61           | 0.53                                              | 0.63                            |                            | 0.49                        |                    |              |             | 0.23              | 0.47                                       | 0.18           | 0.44                           | 0.01           | 0.25            | 0.07                          | 0.58                          | -0.03           | 0.27                          | 0.57                          |                               |                                                                       |
|                         |                |         |                |                               |                |                                                   |                                 |                            |                             |                    |              |             |                   |                                            |                |                                |                |                 |                               |                               |                 |                               |                               |                               | b <sub>11</sub> -H <sub>2</sub> O<br>-0.66<br>y <sub>11</sub><br>0.27 |

# Peak 54

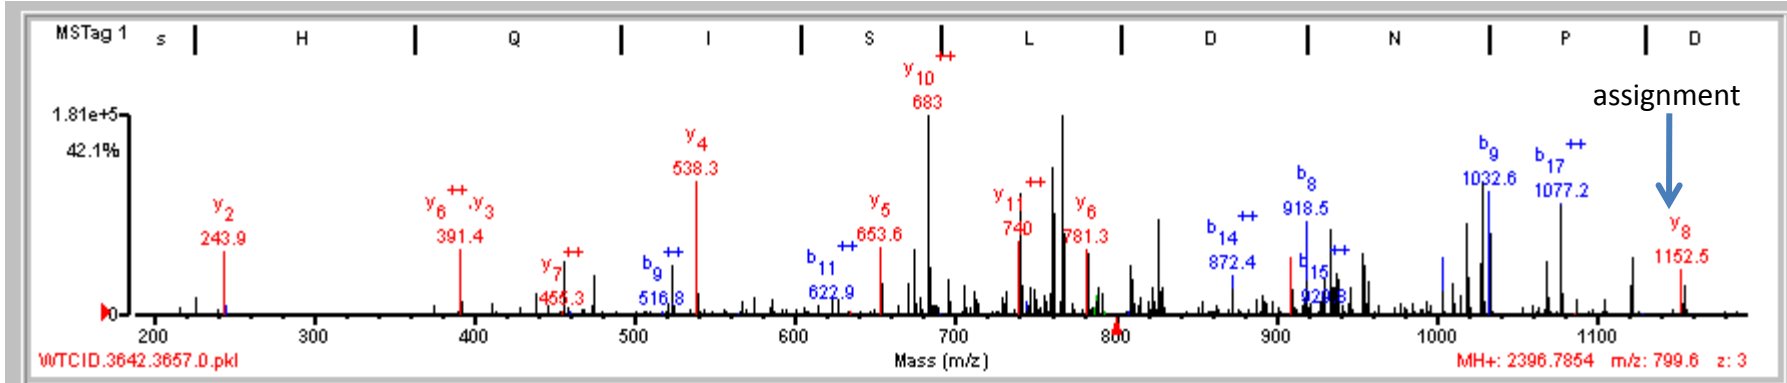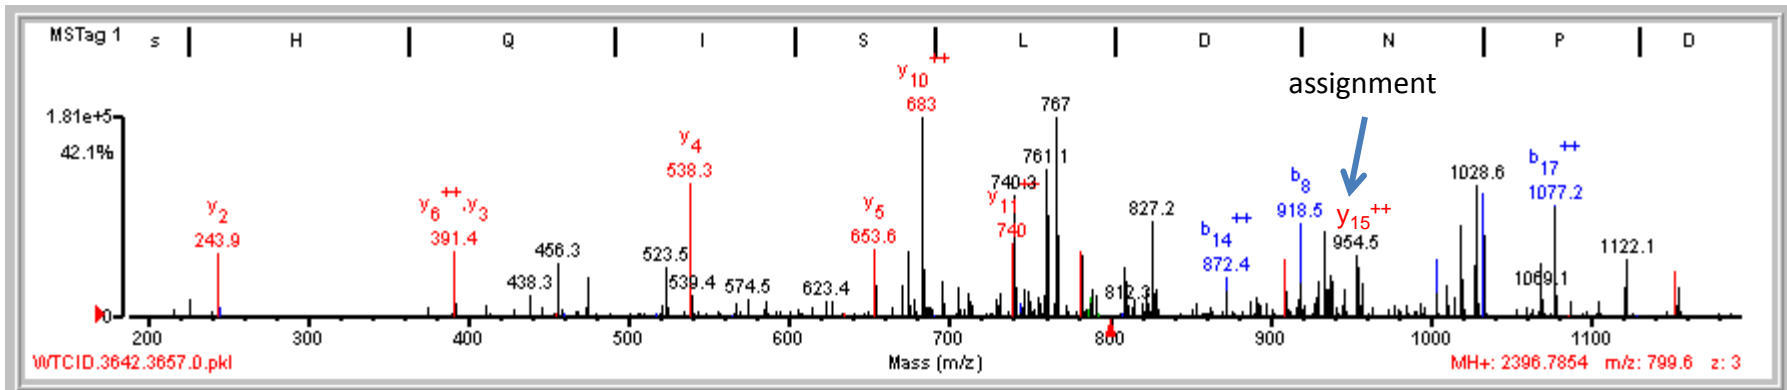

| Rank                    | Score          | SPI (%)        | BCS            | # Unmatched Ions | Variable sites                     | Sequence                                       | MH <sup>+</sup> Calculated (Da) | MH <sup>+</sup> Error (Da) | MH <sup>+</sup> Error (ppm) | Protein MW/pl (Da) | Species        | Accession #        | MS-Digest Index #  | Protein Name                               |                |                |                                                |                    |                    |                    |                    |                    |                |                                     |                    |
|-------------------------|----------------|----------------|----------------|------------------|------------------------------------|------------------------------------------------|---------------------------------|----------------------------|-----------------------------|--------------------|----------------|--------------------|--------------------|--------------------------------------------|----------------|----------------|------------------------------------------------|--------------------|--------------------|--------------------|--------------------|--------------------|----------------|-------------------------------------|--------------------|
| 1                       | 17.06          | 81.0           | 9              | 5/25             | Y1172y S1162s                      | (K)G S H Q/I S L D N I P D Y/Q/Q/D/F I P K (E) | 2236.03                         | 160.7549                   | 343.1                       | 134278.3/6.26      | Homo sapiens   | 29725609           | 2364               | epidermal growth factor receptor isoform a |                |                |                                                |                    |                    |                    |                    |                    |                |                                     |                    |
| Fragment-ion (m/z)      | 243.93         | 391.36         | 538.34         | 653.55           | 674.40                             | 682.98                                         | 739.97                          | 740.33                     | 761.14                      | 767.01             | 781.32         | 809.33             | 827.25             | 872.41                                     | 909.49         | 918.53         | 934.61                                         | 937.83             | 954.48             | 1003.42            | 1019.34            | 1028.57            | 1032.61        | 1068.30                             | 1077.25            |
| Frac. Inten. (% of TIC) | 2.41           | 2.23           | 4.08           | 2.61             | 1.97                               | 20.18                                          | 1.86                            | 4.93                       | 0.21                        | 0.36               | 4.21           | 2.21               | 4.22               | 1.90                                       | 2.20           | 3.76           | 4.78                                           | 2.38               | 4.52               | 2.92               | 4.48               | 5.70               | 5.94           | 3.84                                | 6.10               |
| Rel. Inten. (% of BP)   | 11.95          | 11.07          | 20.23          | 12.93            | 9.75                               | 100.00                                         | 9.20                            | 24.43                      | 1.03                        | 1.79               | 20.88          | 10.96              | 20.93              | 9.41                                       | 10.89          | 18.61          | 23.69                                          | 11.78              | 22.39              | 14.45              | 22.22              | 28.25              | 29.45          | 19.03                               | 30.25              |
| Score                   | 1.00           | 1.00           | 1.00           | 1.00             | 0.50                               | 1.00                                           | 1.00                            | 1.00                       | 0.25                        | 1.50               | 1.00           | 1.00               | -0.21              | 1.00                                       | 1.00           | 1.00           | 0.25                                           | -0.12              | 1.00               | 1.00               | -0.22              | 1.00               | 1.00           | 0.50                                | 1.00               |
| Ion-type                | y <sub>2</sub> | y <sub>3</sub> | y <sub>4</sub> | y <sub>5</sub>   | y <sub>6</sub> ++-H <sub>2</sub> O | y <sub>6</sub> ++                              | y <sub>7</sub> ++               | y <sub>8</sub> ++          | st                          | sty                | y <sub>6</sub> | b <sub>14</sub> ++ | b <sub>14</sub> ++ | b <sub>14</sub> ++                         | y <sub>7</sub> | b <sub>8</sub> | b <sub>9</sub> -H <sub>3</sub> PO <sub>4</sub> | y <sub>15</sub> ++ | y <sub>15</sub> ++ | b <sub>17</sub> ++ | b <sub>17</sub> ++ | b <sub>17</sub> ++ | b <sub>9</sub> | b <sub>17</sub> ++-H <sub>2</sub> O | b <sub>17</sub> ++ |
| Delta Da                | -0.24          | 0.13           | 0.04           | 0.22             | 0.62                               | 0.20                                           | 0.17                            | 0.53                       | 0.48                        | 0.34               | -0.07          |                    |                    | 0.09                                       | 0.04           | 0.16           | 0.17                                           |                    | 0.56               | 0.05               |                    | 0.20               | 0.40           | 0.34                                |                    |

# Peak 55

Ions that verify assignment

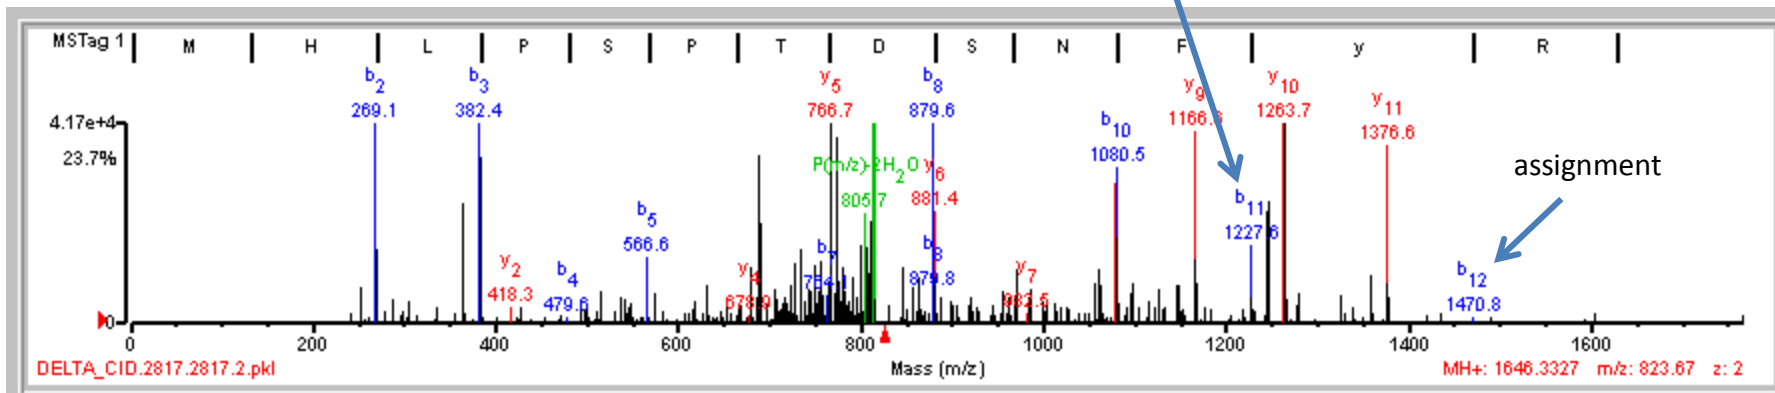

assignment

| Rank                    | Score          | SPI (%) | BCS                           | # Unmatched ions | Variable sites                    | Sequence                         | MH <sup>+</sup> Calculated (Da) | MH <sup>+</sup> Error (Da)      | MH <sup>+</sup> Error (ppm)   | Protein MW/pI (Da) | Species      | Accession #              | MS-Digest Index #    | Protein Name                               |                |                                  |                |                                  |                |                 |                                   |                                  |                 |                 |
|-------------------------|----------------|---------|-------------------------------|------------------|-----------------------------------|----------------------------------|---------------------------------|---------------------------------|-------------------------------|--------------------|--------------|--------------------------|----------------------|--------------------------------------------|----------------|----------------------------------|----------------|----------------------------------|----------------|-----------------|-----------------------------------|----------------------------------|-----------------|-----------------|
| 1                       | 17.70          | 93.2    | 9                             | 4/24             | Y998y                             | (R)M H L P S P T D S N F y R (A) | 1564.72                         | 81.6114                         | 999.3                         | 134278.3/6.26      | Homo sapiens | <a href="#">29725609</a> | <a href="#">2364</a> | epidermal growth factor receptor isoform a |                |                                  |                |                                  |                |                 |                                   |                                  |                 |                 |
| Fragment-ion (m/z)      | 269.12         | 364.31  | 382.35                        | 631.40           | 680.30                            | 689.59                           | 735.65                          | 749.55                          | 757.79                        | 766.67             | 774.36       | 800.66                   | 811.38               | 879.57                                     | 881.36         | 1060.72                          | 1079.54        | 1148.43                          | 1165.72        | 1227.61         | 1245.62                           | 1246.64                          | 1263.72         | 1376.57         |
| Frac. Inten. (% of TIC) | 6.83           | 2.27    | 11.28                         | 1.12             | 1.49                              | 4.11                             | 1.07                            | 1.51                            | 1.38                          | 9.87               | 0.13         | 1.76                     | 1.68                 | 3.41                                       | 2.63           | 1.63                             | 5.84           | 1.27                             | 6.97           | 1.71            | 1.61                              | 3.86                             | 22.43           | 4.15            |
| Rel. Inten. (% of BP)   | 30.43          | 10.11   | 50.28                         | 4.97             | 6.65                              | 18.31                            | 4.78                            | 6.74                            | 6.15                          | 44.01              | 0.59         | 7.83                     | 7.48                 | 15.22                                      | 11.71          | 7.27                             | 26.01          | 5.65                             | 31.05          | 7.61            | 7.18                              | 17.21                            | 100.00          | 18.51           |
| Score                   | 1.00           | -0.10   | 1.00                          | -0.05            | 0.50                              | 1.00                             | 0.50                            | 1.00                            | 1.00                          | 1.00               | 1.50         | -0.08                    | -0.07                | 1.00                                       | 1.00           | 0.50                             | 1.00           | 0.50                             | 1.00           | 1.00            | 1.00                              | 0.50                             | 1.00            | 1.00            |
| Ion-type                | b <sub>2</sub> |         | b <sub>3</sub>                |                  | y <sup>++</sup> -H <sub>2</sub> O | y <sup>++</sup> <sub>11</sub>    | a <sub>7</sub>                  | y <sub>5</sub> -NH <sub>3</sub> | y <sup>++</sup> <sub>12</sub> | y <sub>5</sub>     | sty          |                          |                      | b <sub>8</sub>                             | y <sub>6</sub> | y <sub>8</sub> -H <sub>2</sub> O | y <sub>8</sub> | y <sub>9</sub> -H <sub>2</sub> O | y <sub>9</sub> | b <sub>11</sub> | b <sub>11</sub> +H <sub>2</sub> O | y <sub>10</sub> -NH <sub>3</sub> | y <sub>10</sub> | y <sub>11</sub> |
| Delta Da                | 0.01           |         | 0.16                          |                  | 0.51                              | 0.79                             | -0.73                           | 0.28                            | 0.46                          | 0.38               | 0.50         |                          |                      | 0.17                                       | 0.04           | -0.69                            | 0.12           | -0.01                            | -0.73          | 0.06            | 0.06                              | 0.16                             | 0.22            | -0.02           |
|                         |                |         | b <sup>++</sup> <sub>-7</sub> |                  |                                   |                                  | b <sup>++</sup> <sub>-12</sub>  |                                 |                               |                    |              |                          |                      |                                            |                |                                  |                |                                  |                | 0.06            |                                   |                                  |                 |                 |
|                         |                |         | -0.34                         |                  |                                   |                                  | -0.14                           |                                 |                               |                    |              |                          |                      |                                            |                |                                  |                |                                  |                | 0.06            |                                   |                                  |                 |                 |
|                         |                |         |                               |                  |                                   |                                  |                                 |                                 |                               |                    |              |                          |                      |                                            |                |                                  |                |                                  |                | 0.13            |                                   |                                  |                 |                 |





# Peak 58

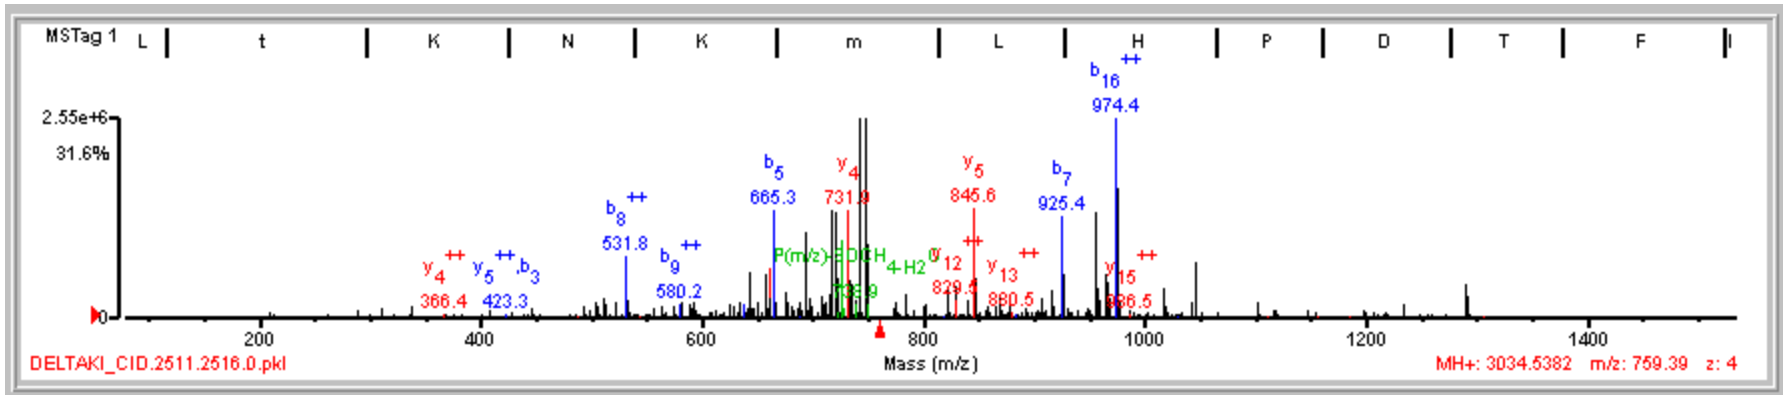

| Rank                    | Score                         | SPI (%) | # BCS  | Unmatched Ions | Variable sites          | Sequence                                              | MH* Calculated (Da) | MH* Error (Da) | MH* Error (ppm) | Protein MW/pI (Da) | Species      | Accession #              | MS-Digest Index #     | Protein Name                    |                                   |                |                |                                 |                                                  |        |                                |         |                                 |         |  |
|-------------------------|-------------------------------|---------|--------|----------------|-------------------------|-------------------------------------------------------|---------------------|----------------|-----------------|--------------------|--------------|--------------------------|-----------------------|---------------------------------|-----------------------------------|----------------|----------------|---------------------------------|--------------------------------------------------|--------|--------------------------------|---------|---------------------------------|---------|--|
| 1                       | 11.77                         | 76.7    | 8      | 9/24           | M413m T409t Y428y Y429y | (K) L/t K N K\m/L\H\p D T F I Q L A\L Q/L/A/Y Y R (L) | 2777.52             | 257.0211       | 371.4           | 70178.9/6.63       | Homo sapiens | <a href="#">31542325</a> | <a href="#">17687</a> | carnitine O-octanoyltransferase |                                   |                |                |                                 |                                                  |        |                                |         |                                 |         |  |
| Fragment-ion (m/z)      | 531.84                        | 642.90  | 656.82 | 660.89         | 665.04                  | 665.31                                                | 692.99              | 707.57         | 710.46          | 716.85             | 721.22       | 727.05                   | 731.86                | 741.74                          | 747.87                            | 845.60         | 925.41         | 956.47                          | 965.30                                           | 966.97 | 974.37                         | 1017.34 | 1045.55                         | 1290.61 |  |
| Frac. Inten. (% of TIC) | 2.28                          | 1.88    | 2.35   | 1.95           | 1.77                    | 5.05                                                  | 4.29                | 1.42           | 0.04            | 3.65               | 4.17         | 0.07                     | 4.10                  | 9.49                            | 23.74                             | 4.30           | 4.13           | 4.52                            | 2.40                                             | 2.23   | 10.79                          | 1.52    | 2.03                            | 1.83    |  |
| Rel. Inten. (% of BP)   | 9.62                          | 7.93    | 9.89   | 8.20           | 7.46                    | 21.29                                                 | 18.07               | 5.99           | 0.18            | 15.38              | 17.55        | 0.31                     | 17.26                 | 39.97                           | 100.00                            | 18.10          | 17.41          | 19.03                           | 10.10                                            | 9.41   | 45.47                          | 6.39    | 8.55                            | 7.71    |  |
| Score                   | 1.00                          | -0.08   | -0.10  | 1.00           | 1.00                    | 1.00                                                  | -0.18               | -0.06          | 1.00            | -0.15              | -0.18        | 1.00                     | 1.00                  | 1.00                            | 0.25                              | 1.00           | 1.00           | 0.50                            | 0.50                                             | -0.09  | 1.00                           | -0.06   | 0.50                            | -0.08   |  |
| Ion-type                | b <sup>+++</sup> <sub>8</sub> |         |        | y <sub>3</sub> | b <sub>5</sub>          | b <sub>5</sub>                                        |                     |                | st              |                    |              | m                        | y <sub>4</sub>        | y <sup>+++</sup> <sub>17</sub>  | b <sub>6</sub> -SOCH <sub>4</sub> | y <sub>5</sub> | b <sub>7</sub> | y <sub>6</sub> -NH <sub>3</sub> | b <sup>+++</sup> <sub>16</sub> -H <sub>2</sub> O |        | b <sup>+++</sup> <sub>16</sub> |         | b <sub>8</sub> -NH <sub>3</sub> |         |  |
| Delta Da                | 0.08                          |         |        | -0.29          | -0.30                   | -0.03                                                 |                     |                | 0.34            |                    |              | -0.06                    | -0.36                 | 0.39                            | -0.51                             | 0.30           | -0.05          | 0.14                            | -0.19                                            |        | -0.12                          |         | 0.06                            |         |  |
|                         |                               |         |        |                |                         |                                                       |                     |                |                 |                    |              |                          |                       |                                 |                                   |                |                |                                 |                                                  |        | y <sup>+++</sup> <sub>22</sub> |         |                                 |         |  |
|                         |                               |         |        |                |                         |                                                       |                     |                |                 |                    |              |                          |                       |                                 |                                   |                |                |                                 |                                                  |        | 0.26                           |         |                                 |         |  |



# Peak 60

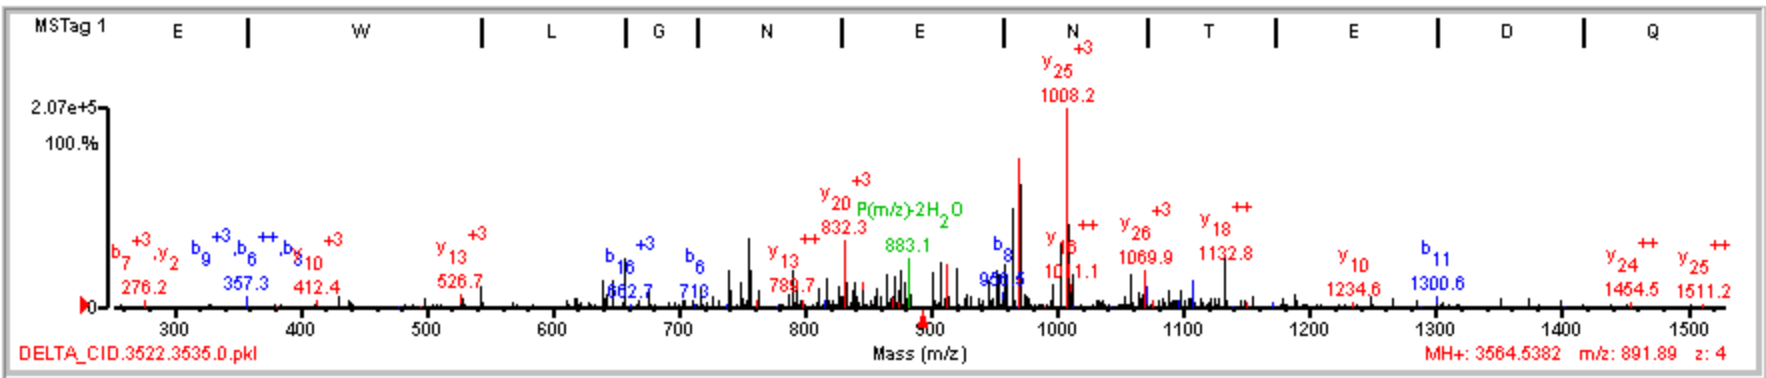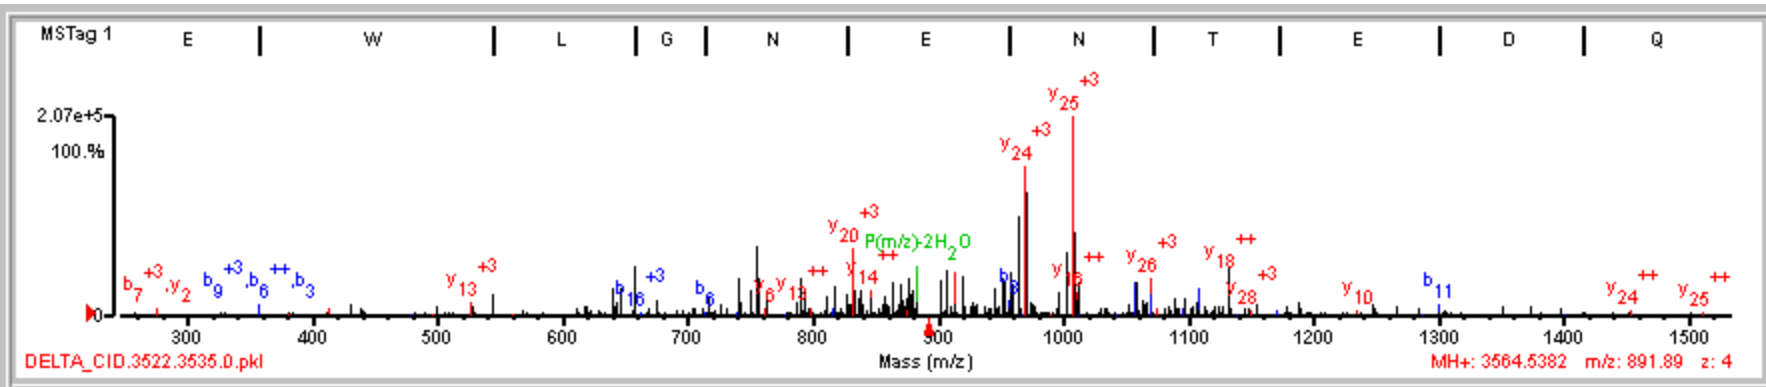

|   |       |      |   |      |       |                                                                                     |         |         |       |              |              |                          |                     |                                                                   |
|---|-------|------|---|------|-------|-------------------------------------------------------------------------------------|---------|---------|-------|--------------|--------------|--------------------------|---------------------|-------------------------------------------------------------------|
| 1 | 10.75 | 69.4 | 9 | 9/22 | Y607y | (K) L N E W / L I G / N / E N I T E / D Q / Y S / L V / E D D E D L P H H D E K (T) | 3483.51 | 81.0287 | 298.0 | 83598.8/5.84 | Homo sapiens | <a href="#">32455248</a> | <a href="#">339</a> | phosphoinositide-3-kinase, regulatory subunit 1 (alpha) isoform 1 |
| 1 | 10.75 | 69.4 | 9 | 9/22 | Y307y | (K) L N E W / L I G / N / E N I T E / D Q / Y S / L V / E D D E D L P H H D E K (T) | 3483.51 | 81.0287 | 298.0 | 49965.3/7.20 | Homo sapiens | <a href="#">32455250</a> | <a href="#">643</a> | phosphoinositide-3-kinase, regulatory subunit 1 (alpha) isoform 3 |

| Fragment-ion (m/z)      | 656.94         | 740.26                        | 755.98                         | 790.13 | 832.31                         | 846.27                        | 870.88 | 879.24 | 907.43 | 913.28                         | 919.92 | 951.57                         | 958.78 | 964.48 | 964.90 | 970.31                         | 1002.39                                         | 1008.18                        | 1011.13                       | 1058.22 | 1069.88        | 1132.76                       |
|-------------------------|----------------|-------------------------------|--------------------------------|--------|--------------------------------|-------------------------------|--------|--------|--------|--------------------------------|--------|--------------------------------|--------|--------|--------|--------------------------------|-------------------------------------------------|--------------------------------|-------------------------------|---------|----------------|-------------------------------|
| Frac. Inten. (% of TIC) | 3.38           | 3.30                          | 4.84                           | 3.47   | 4.33                           | 2.24                          | 3.08   | 2.91   | 2.67   | 2.69                           | 2.32   | 4.62                           | 3.62   | 2.26   | 6.78   | 17.48                          | 3.89                                            | 12.17                          | 3.32                          | 3.53    | 2.89           | 4.23                          |
| Rel. Inten. (% of BP)   | 19.32          | 18.87                         | 27.71                          | 19.83  | 24.75                          | 12.81                         | 17.61  | 16.64  | 15.26  | 15.41                          | 13.28  | 26.43                          | 20.73  | 12.94  | 38.79  | 100.00                         | 22.27                                           | 69.64                          | 18.98                         | 20.21   | 16.53          | 24.20                         |
| Score                   | 1.00           | 1.00                          | 1.00                           | -0.20  | 1.00                           | 1.00                          | -0.18  | -0.17  | -0.15  | 1.00                           | -0.13  | 1.00                           | -0.21  | -0.13  | -0.39  | 1.00                           | 0.50                                            | 1.00                           | 1.00                          | -0.20   | 1.00           | 1.00                          |
| Ion-type                | b <sub>7</sub> | y <sup>++</sup> <sub>12</sub> | y <sup>+++</sup> <sub>18</sub> |        | y <sup>+++</sup> <sub>20</sub> | y <sup>++</sup> <sub>14</sub> |        |        |        | y <sup>+++</sup> <sub>22</sub> |        | y <sup>+++</sup> <sub>23</sub> |        |        |        | y <sup>+++</sup> <sub>24</sub> | y <sup>++</sup> <sub>16</sub> -H <sub>2</sub> O | y <sup>+++</sup> <sub>25</sub> | y <sup>++</sup> <sub>18</sub> |         | b <sub>9</sub> | y <sup>++</sup> <sub>18</sub> |
| Delta Da                | 0.60           | 0.45                          | 0.67                           |        | 0.31                           | 0.39                          |        |        |        | 0.25                           |        | 0.52                           |        |        |        | 0.26                           | 0.48                                            | 0.43                           | 0.22                          |         | -0.61          | 0.31                          |

# Peak 61

Ions that verify assignment

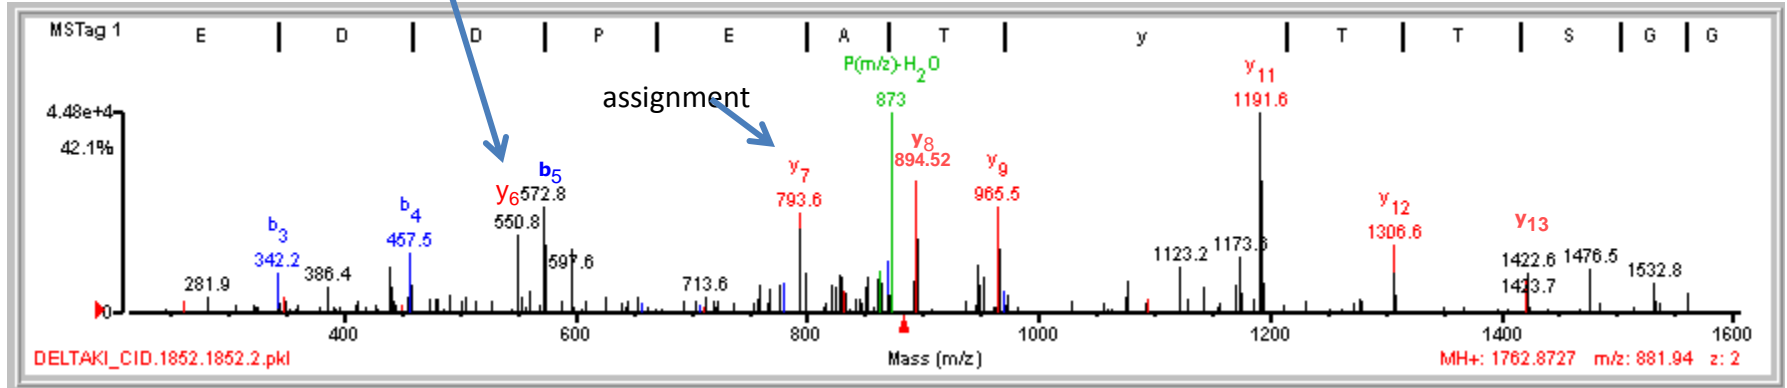

| Rank                    | Score          | SPI (%)                          | BCS            | # Unmatched Ions | # Variable sites | Sequence                         | MH <sup>+</sup> Calculated (Da) | MH <sup>+</sup> Error (Da) | MH <sup>+</sup> Error (ppm) | Protein MW/pI (Da)               | Species        | Accession #              | MS-Digest Index #                | Protein Name          |         |                                   |                 |                 |                 |
|-------------------------|----------------|----------------------------------|----------------|------------------|------------------|----------------------------------|---------------------------------|----------------------------|-----------------------------|----------------------------------|----------------|--------------------------|----------------------------------|-----------------------|---------|-----------------------------------|-----------------|-----------------|-----------------|
| 1                       | 13.73          | 91.6                             | 7              | 3/19             | Y772y            | (R)VLEDDPE A T/y/T T S G G K (I) | 1682.78                         | 80.0972                    | 74.2                        | 108267.1/5.86                    | Homo sapiens   | <a href="#">32967311</a> | <a href="#">13835</a>            | ephrin receptor EphA2 |         |                                   |                 |                 |                 |
| Fragment-ion (m/z)      | 342.25         | 439.54                           | 457.49         | 550.78           | 572.76           | 597.14                           | 793.65                          | 799.07                     | 831.05                      | 851.64                           | 869.62         | 894.52                   | 947.29                           | 965.48                | 1123.20 | 1173.64                           | 1191.60         | 1306.65         | 1421.77         |
| Frac. Inten. (% of TIC) | 1.56           | 3.32                             | 3.14           | 2.70             | 6.69             | 4.01                             | 6.39                            | 1.91                       | 2.81                        | 2.67                             | 3.37           | 8.22                     | 2.10                             | 5.88                  | 1.59    | 3.96                              | 31.44           | 5.06            | 3.20            |
| Rel. Inten. (% of BP)   | 4.97           | 10.55                            | 9.99           | 8.60             | 21.27            | 12.76                            | 20.32                           | 6.08                       | 8.95                        | 8.48                             | 10.71          | 26.13                    | 6.67                             | 18.70                 | 5.05    | 12.58                             | 100.00          | 16.11           | 10.19           |
| Score                   | 1.00           | 0.50                             | 1.00           | 1.00             | 1.00             | -0.13                            | 1.00                            | 1.00                       | -0.09                       | 0.50                             | 1.00           | 1.00                     | 0.50                             | 1.00                  | -0.05   | 0.50                              | 1.00            | 1.00            | 1.00            |
| Ion-type                | b <sub>3</sub> | b <sub>4</sub> -H <sub>2</sub> O | b <sub>4</sub> | y <sub>6</sub>   | b <sub>5</sub>   |                                  | y <sub>7</sub>                  | b <sub>7</sub>             |                             | b <sub>8</sub> -H <sub>2</sub> O | b <sub>8</sub> | y <sub>8</sub>           | y <sub>9</sub> -H <sub>2</sub> O | y <sub>9</sub>        |         | y <sub>11</sub> -H <sub>2</sub> O | y <sub>11</sub> | y <sub>12</sub> | y <sub>13</sub> |
| Delta Da                | 0.05           | 0.32                             | 0.26           | 0.50             | 0.50             |                                  | 0.34                            | 0.72                       |                             | 0.26                             | 0.23           | 0.16                     | -0.10                            | 0.08                  |         | 0.16                              | 0.11            | 0.13            | 0.22            |

# Peak 62

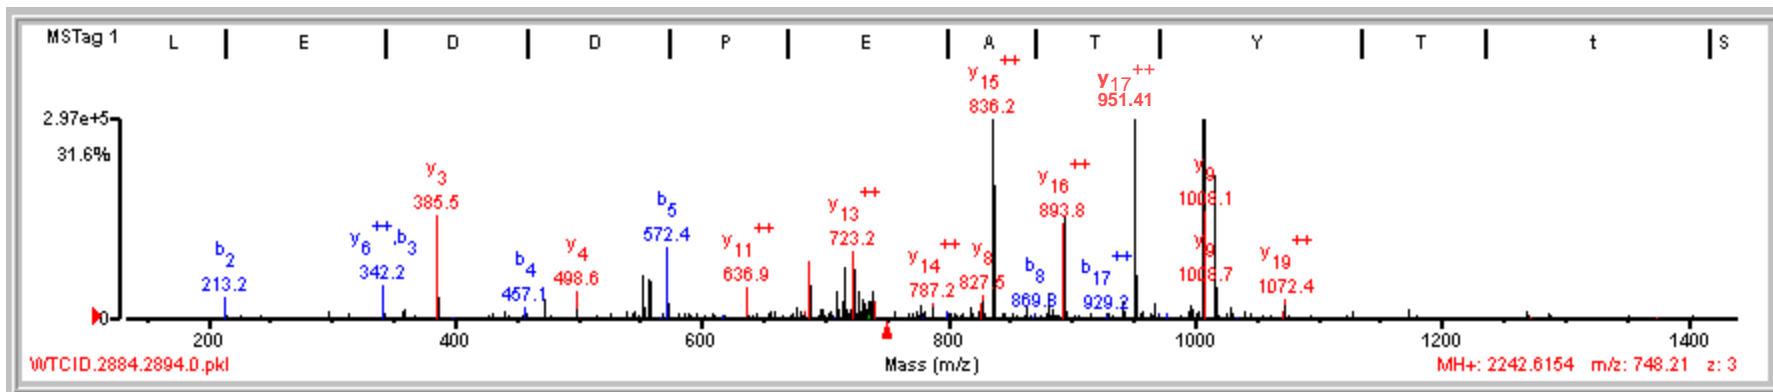

| 1                      | 19.36                         | 96.4           | 12             | 3/22   | Y772y                          | (R)V/L/E/D/D   | P/E/A/T/Y                     | T T/S                         | G/G                                             | K/I/P                           | I R (W)                       | 2162.10 | 80.5179 | 245.9                         | 108267.1/5.86                                    | Homo sapiens                  | <a href="#">32967311</a>      | <a href="#">13835</a>         | ephrin receptor EphA2                           |                               |                               |                               |
|------------------------|-------------------------------|----------------|----------------|--------|--------------------------------|----------------|-------------------------------|-------------------------------|-------------------------------------------------|---------------------------------|-------------------------------|---------|---------|-------------------------------|--------------------------------------------------|-------------------------------|-------------------------------|-------------------------------|-------------------------------------------------|-------------------------------|-------------------------------|-------------------------------|
| Fragment-ion (m/z)     | 342.18                        | 385.47         | 498.61         | 552.16 | 557.97                         | 572.39         | 636.92                        | 687.72                        | 713.97                                          | 715.60                          | 723.15                        | 727.78  | 739.54  | 787.19                        | 827.49                                           | 836.23                        | 893.77                        | 951.41                        | 1006.98                                         | 1015.66                       | 1015.94                       | 1072.35                       |
| Frac. Inten.(% of TIC) | 1.00                          | 3.10           | 1.06           | 1.18   | 1.88                           | 2.23           | 1.08                          | 2.50                          | 1.12                                            | 0.08                            | 3.78                          | 1.27    | 1.16    | 1.31                          | 1.61                                             | 25.20                         | 5.44                          | 10.13                         | 25.00                                           | 2.06                          | 6.61                          | 1.17                          |
| Rel. Inten.(% of BP)   | 3.97                          | 12.32          | 4.20           | 4.68   | 7.48                           | 8.87           | 4.28                          | 9.91                          | 4.42                                            | 0.32                            | 15.00                         | 5.06    | 4.61    | 5.20                          | 6.39                                             | 100.00                        | 21.58                         | 40.20                         | 99.19                                           | 8.19                          | 26.24                         | 4.65                          |
| Score                  | 1.00                          | 1.00           | 1.00           | -0.05  | 1.00                           | 1.00           | 1.00                          | 1.00                          | 0.50                                            | 1.50                            | 1.00                          | -0.05   | -0.05   | 1.00                          | 1.00                                             | 1.00                          | 1.00                          | 1.00                          | 0.50                                            | 1.00                          | 1.00                          | 1.00                          |
| Ion-type               | b <sub>3</sub>                | y <sub>3</sub> | y <sub>4</sub> |        | y <sup>+++</sup> <sub>15</sub> | b <sub>5</sub> | y <sup>++</sup> <sub>11</sub> | y <sup>++</sup> <sub>12</sub> | y <sup>++</sup> <sub>13</sub> -H <sub>2</sub> O | y <sup>+++</sup> <sub>19</sub>  | y <sup>++</sup> <sub>13</sub> |         |         | y <sup>++</sup> <sub>14</sub> | y <sub>8</sub>                                   | y <sup>++</sup> <sub>15</sub> | y <sup>++</sup> <sub>16</sub> | y <sup>++</sup> <sub>17</sub> | y <sup>++</sup> <sub>16</sub> -H <sub>2</sub> O | y <sup>++</sup> <sub>18</sub> | y <sup>++</sup> <sub>18</sub> | y <sup>++</sup> <sub>19</sub> |
| Delta Da               | -0.02                         | 0.21           | 0.27           |        | 0.36                           | 0.13           | 0.10                          | 0.38                          | 0.11                                            | 0.60                            | 0.29                          |         |         | -0.19                         | -0.02                                            | 0.32                          | 0.35                          | 0.47                          | 0.53                                            | 0.20                          | 0.48                          | 0.35                          |
|                        | y <sup>+++</sup> <sub>e</sub> |                |                |        |                                |                |                               |                               |                                                 | y <sub>7</sub> -NH <sub>3</sub> | sty                           |         |         |                               | y <sup>+++</sup> <sub>15</sub> -H <sub>2</sub> O |                               |                               |                               |                                                 |                               |                               |                               |
|                        | -0.05                         |                |                |        |                                |                |                               |                               |                                                 | 0.23                            | -0.30                         |         |         |                               | 0.58                                             |                               |                               |                               |                                                 |                               |                               |                               |

# Peak 63

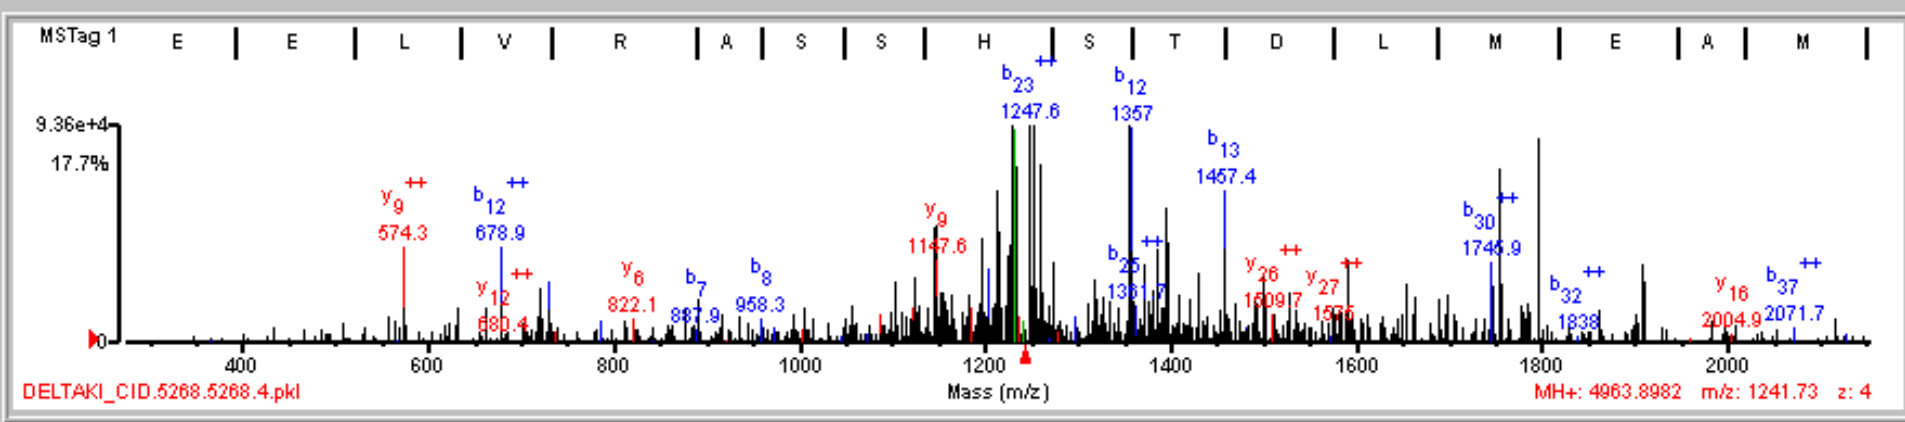

|   |       |      |   |      |                         |                                                                                                       |         |          |       |              |              |                          |                      |                                   |
|---|-------|------|---|------|-------------------------|-------------------------------------------------------------------------------------------------------|---------|----------|-------|--------------|--------------|--------------------------|----------------------|-----------------------------------|
| 1 | 12.40 | 72.4 | 6 | 9/24 | T432t Y421y S420s S434s | (K) L F E E L V R A S S H S T I D L M E A M A M G \ S V E A S Y K C \ L A A A I L I V L t e s G R (S) | 4644.28 | 319.6165 | -50.1 | 58062.4/7.61 | Homo sapiens | <a href="#">33286422</a> | <a href="#">17</a>   | pyruvate kinase, muscle isoform 2 |
| 1 | 12.40 | 72.4 | 6 | 9/24 | T432t Y421y S420s S434s | (K) L F E E L V R A S S H S T I D L M E A M A M G \ S V E A S Y K C \ L A A A I L I V L t e s G R (S) | 4644.28 | 319.6165 | -50.1 | 58062.4/7.61 | Homo sapiens | <a href="#">33286420</a> | <a href="#">8655</a> | pyruvate kinase, muscle isoform 2 |

| Fragment-ion (m/z)      | 574.30                       | 678.93                        | 720.51                                          | 729.80                        | 1146.98        | 1195.98 | 1203.75                        | 1214.02 | 1229.73 | 1247.60                       | 1251.98                          | 1252.76                          | 1260.45 | 1318.55 | 1356.14         | 1385.59 | 1394.33 | 1457.38                          | 1458.14         | 1501.16 | 1746.59                       | 1754.66                       | 1796.09 | 1909.90                       |
|-------------------------|------------------------------|-------------------------------|-------------------------------------------------|-------------------------------|----------------|---------|--------------------------------|---------|---------|-------------------------------|----------------------------------|----------------------------------|---------|---------|-----------------|---------|---------|----------------------------------|-----------------|---------|-------------------------------|-------------------------------|---------|-------------------------------|
| Frac. Inten. (% of TIC) | 2.17                         | 1.85                          | 1.69                                            | 1.60                          | 3.60           | 1.92    | 1.92                           | 4.11    | 4.21    | 25.14                         | 2.37                             | 7.57                             | 4.24    | 2.48    | 8.52            | 1.75    | 3.46    | 2.01                             | 4.36            | 1.67    | 2.33                          | 4.51                          | 3.81    | 2.72                          |
| Rel. Inten. (% of BP)   | 8.63                         | 7.35                          | 6.73                                            | 6.37                          | 14.30          | 7.65    | 7.63                           | 16.35   | 16.74   | 100.00                        | 9.43                             | 30.09                            | 16.86   | 9.87    | 33.91           | 6.96    | 13.75   | 8.01                             | 17.33           | 6.63    | 9.25                          | 17.94                         | 15.15   | 10.82                         |
| Score                   | 1.00                         | 1.00                          | 0.50                                            | 1.00                          | 1.00           | -0.08   | 1.00                           | -0.16   | -0.17   | 1.00                          | 0.50                             | 0.50                             | -0.17   | -0.10   | 1.00            | -0.07   | -0.14   | 1.00                             | 1.00            | -0.07   | 1.00                          | 1.00                          | -0.15   | 1.00                          |
| Ion-type                | y <sup>++</sup> <sub>9</sub> | b <sup>++</sup> <sub>12</sub> | b <sup>++</sup> <sub>13</sub> -H <sub>2</sub> O | b <sup>++</sup> <sub>13</sub> | y <sub>9</sub> |         | b <sup>++</sup> <sub>22</sub>  |         |         | b <sup>++</sup> <sub>23</sub> | b <sub>11</sub> -NH <sub>3</sub> | b <sub>11</sub> -NH <sub>3</sub> |         |         | b <sub>12</sub> |         |         | b <sub>13</sub>                  | b <sub>13</sub> |         | b <sup>++</sup> <sub>30</sub> | y <sup>++</sup> <sub>30</sub> |         | b <sup>++</sup> <sub>34</sub> |
| Delta Da                | 0.04                         | 0.08                          | 0.14                                            | 0.43                          | -0.54          |         | -0.31                          |         |         | 0.03                          | -0.65                            | 0.13                             |         |         | -0.55           |         |         | -0.36                            | 0.40            |         | 0.36                          | 0.45                          |         | 0.58                          |
|                         |                              |                               |                                                 |                               |                |         | y <sup>+++</sup> <sub>31</sub> |         |         |                               |                                  |                                  |         |         |                 |         |         | y <sub>13</sub> -NH <sub>3</sub> |                 |         |                               |                               |         |                               |
|                         |                              |                               |                                                 |                               |                |         | 0.26                           |         |         |                               |                                  |                                  |         |         |                 |         |         | 0.70                             |                 |         |                               |                               |         |                               |

# Peak 64

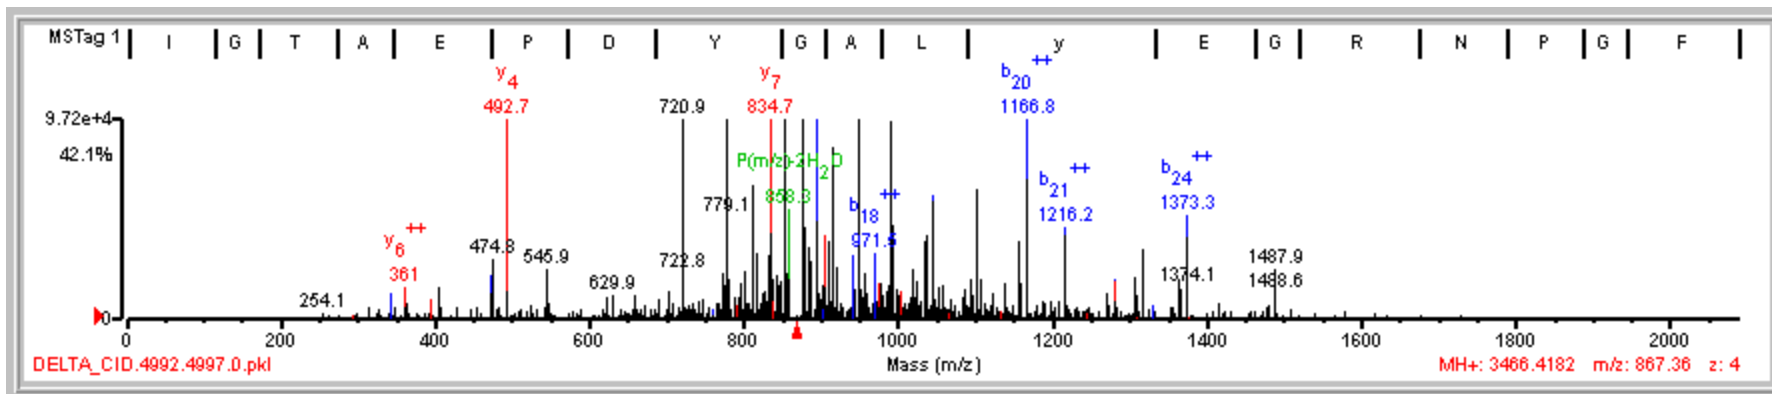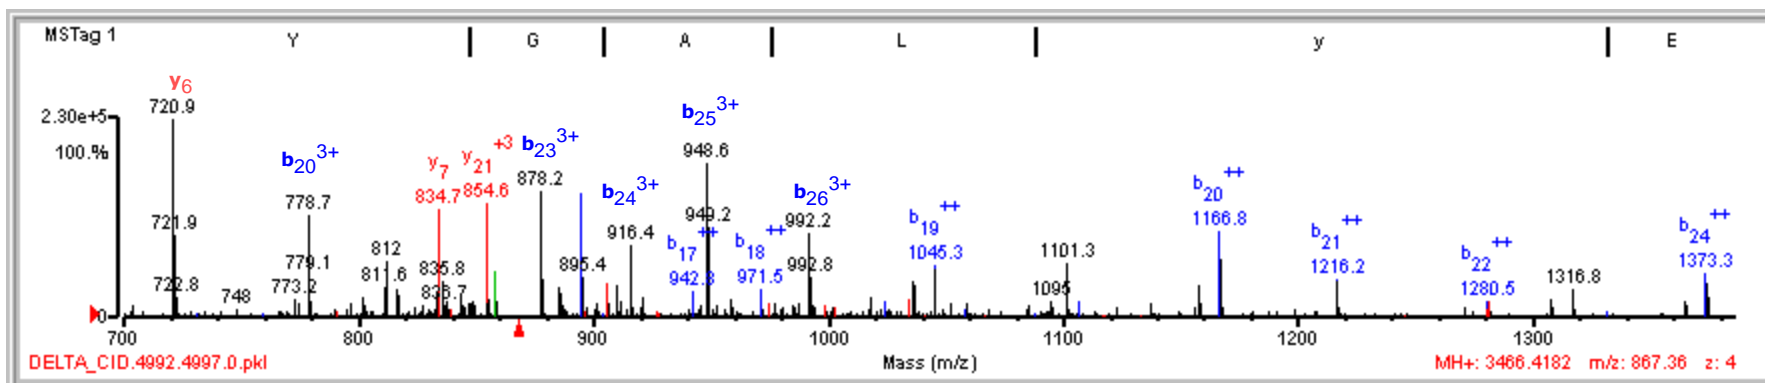

1 19.68 91.7 9 3/25 Y771y Y783y (K) IGTAE PDY GAL YEGRNPGF YV\EA|N|P|M|P T F K (C) 3304.56 161.8562 554.9 148532.9/5.73 Homo sapiens [33598946](#) [14027](#) phospholipase C gamma 1 isoform b

| Fragment-ion (m/z)      | 492.70         | 720.89         | 778.71                         | 812.01 | 816.51                           | 834.74         | 843.63 | 854.55                         | 878.16                         | 886.15                                           | 894.80                         | 905.55         | 910.51 | 916.45                         | 948.64                         | 992.19                         | 1036.52                                          | 1045.34                        | 1101.28 | 1157.78                                          | 1166.75                        | 1216.20                        | 1280.53                        | 1316.79                        | 1373.30                        |
|-------------------------|----------------|----------------|--------------------------------|--------|----------------------------------|----------------|--------|--------------------------------|--------------------------------|--------------------------------------------------|--------------------------------|----------------|--------|--------------------------------|--------------------------------|--------------------------------|--------------------------------------------------|--------------------------------|---------|--------------------------------------------------|--------------------------------|--------------------------------|--------------------------------|--------------------------------|--------------------------------|
| Frac. Inten. (% of TIC) | 4.52           | 10.14          | 5.36                           | 2.31   | 2.60                             | 5.44           | 0.05   | 5.44                           | 5.73                           | 2.02                                             | 6.57                           | 2.01           | 1.93   | 2.77                           | 9.44                           | 5.22                           | 2.63                                             | 3.30                           | 4.08    | 2.05                                             | 5.62                           | 3.19                           | 1.83                           | 1.65                           | 4.10                           |
| Rel. Inten. (% of BP)   | 44.64          | 100.00         | 52.84                          | 22.77  | 25.67                            | 53.62          | 0.49   | 53.63                          | 56.55                          | 19.97                                            | 64.80                          | 19.86          | 19.07  | 27.31                          | 93.15                          | 51.51                          | 25.97                                            | 32.61                          | 40.21   | 20.23                                            | 55.41                          | 31.45                          | 18.09                          | 16.30                          | 40.41                          |
| Score                   | 1.00           | 1.00           | 1.00                           | -0.23  | 0.50                             | 1.00           | 1.50   | 1.00                           | 1.00                           | 0.50                                             | 1.00                           | 1.00           | -0.19  | 1.00                           | 1.00                           | 1.00                           | 0.50                                             | 1.00                           | -0.40   | 0.50                                             | 1.00                           | 1.00                           | 1.00                           | 1.00                           | 1.00                           |
| Ion-type                | y <sub>4</sub> | y <sub>6</sub> | b <sup>+++</sup> <sub>20</sub> |        | y <sub>7</sub> -H <sub>2</sub> O | y <sub>7</sub> | sty    | b <sup>+++</sup> <sub>22</sub> | b <sup>+++</sup> <sub>23</sub> | b <sup>+++</sup> <sub>16</sub> -H <sub>2</sub> O | b <sup>+++</sup> <sub>16</sub> | y <sub>8</sub> |        | b <sup>+++</sup> <sub>24</sub> | b <sup>+++</sup> <sub>25</sub> | b <sup>+++</sup> <sub>28</sub> | b <sup>+++</sup> <sub>19</sub> -H <sub>2</sub> O | b <sup>+++</sup> <sub>19</sub> |         | b <sup>+++</sup> <sub>20</sub> -H <sub>2</sub> O | b <sup>+++</sup> <sub>20</sub> | b <sup>+++</sup> <sub>21</sub> | b <sup>+++</sup> <sub>22</sub> | b <sup>+++</sup> <sub>23</sub> | b <sup>+++</sup> <sub>24</sub> |
| Delta Da                | 0.42           | 0.52           | 0.73                           |        | 0.10                             | 0.32           | 1.25   | 0.53                           | 0.46                           | 0.77                                             | 0.41                           | 0.10           |        | 0.74                           | 0.58                           | 0.45                           | 0.57                                             | 0.38                           |         | 0.31                                             | 0.28                           | 0.19                           | 0.00                           | 0.74                           | 0.23                           |

# Peak 65

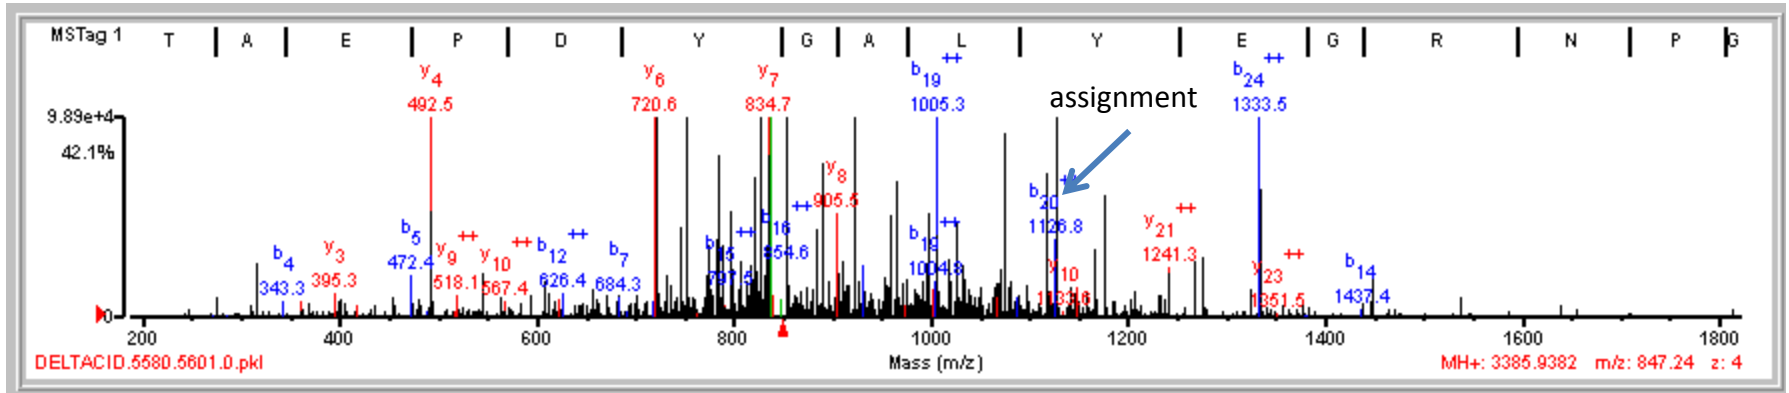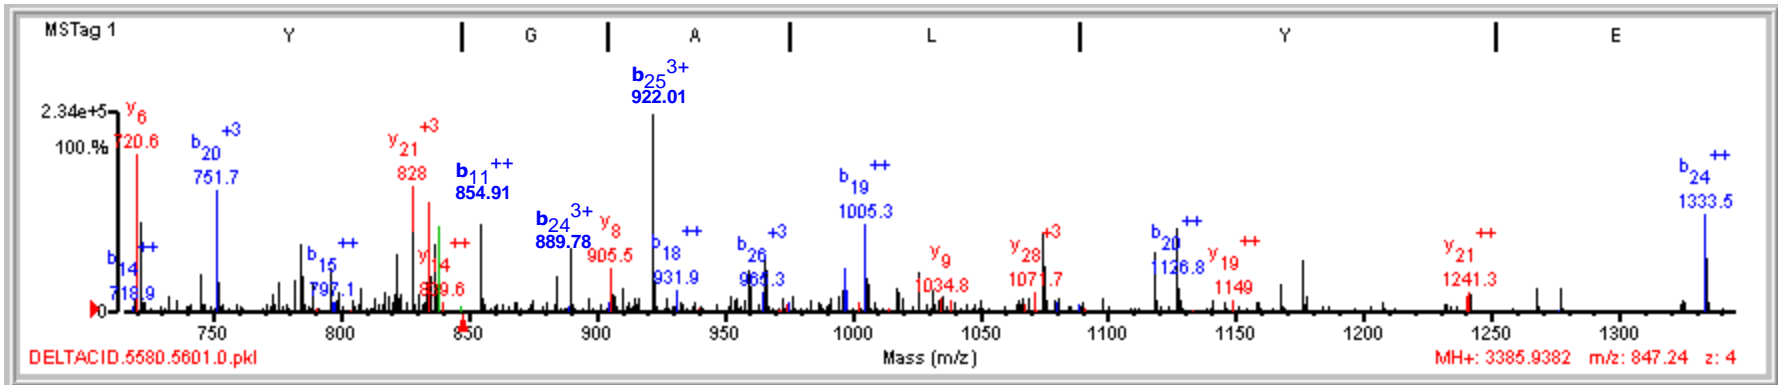

| Rank | Score | SPI (%) | BCS | # Unmatched Ions | Variable sites | Sequence                                                                                | MH* Calculated (Da) | MH* Error (Da) | MH* Error (ppm) | Protein MW/pl (Da) | Species      | Accession #              | MS-Digest Index #     | Protein Name                      |
|------|-------|---------|-----|------------------|----------------|-----------------------------------------------------------------------------------------|---------------------|----------------|-----------------|--------------------|--------------|--------------------------|-----------------------|-----------------------------------|
| 1    | 15.70 | 82.8    | 10  | 6/24             | Y783y          | (K) I G T A E P D Y G / A L Y E G R N P G / F \ y \ V / E / A / N / P / M / P T F K (C) | 3304.56             | 81.3762        | 416.4           | 148532.9/5.73      | Homo sapiens | <a href="#">33598946</a> | <a href="#">14027</a> | phospholipase C gamma 1 isoform b |
| 1    | 15.70 | 82.8    | 10  | 6/24             | Y783y          | (K) I G T A E P D Y G / A L Y E G R N P G / F \ y \ V / E / A / N / P / M / P T F K (C) | 3304.56             | 81.3762        | 416.4           | 148661.0/5.73      | Homo sapiens | <a href="#">33598948</a> | <a href="#">31704</a> | phospholipase C gamma 1 isoform a |

  

| Fragment-ion (m/z)      | 492.48         | 720.57         | 745.69                         | 751.70                         | 784.82                         | 796.22 | 822.12 | 827.98                         | 834.71         | 854.91                         | 889.78                         | 905.54         | 922.01                                           | 931.86                         | 959.59 | 966.09 | 997.09 | 1005.34                        | 1017.62                         | 1074.66 | 1118.22                                          | 1127.20                        | 1176.61                        | 1333.50                        |
|-------------------------|----------------|----------------|--------------------------------|--------------------------------|--------------------------------|--------|--------|--------------------------------|----------------|--------------------------------|--------------------------------|----------------|--------------------------------------------------|--------------------------------|--------|--------|--------|--------------------------------|---------------------------------|---------|--------------------------------------------------|--------------------------------|--------------------------------|--------------------------------|
| Frac. Inten. (% of TIC) | 5.97           | 9.20           | 2.01                           | 5.53                           | 3.81                           | 2.14   | 0.09   | 7.06                           | 6.99           | 3.84                           | 3.09                           | 3.34           | 9.52                                             | 1.78                           | 2.25   | 3.81   | 2.27   | 5.09                           | 2.16                            | 4.69    | 2.81                                             | 4.23                           | 2.69                           | 5.61                           |
| Rel. Inten. (% of BP)   | 62.71          | 96.64          | 21.14                          | 58.13                          | 39.99                          | 22.51  | 0.95   | 74.13                          | 73.47          | 40.33                          | 32.41                          | 35.09          | 100.00                                           | 18.73                          | 23.65  | 40.06  | 23.84  | 53.45                          | 22.68                           | 49.26   | 29.49                                            | 44.48                          | 28.25                          | 58.96                          |
| Score                   | 1.00           | 1.00           | -0.21                          | 1.00                           | 1.00                           | -0.23  | 1.50   | 1.00                           | 1.00           | 1.00                           | 1.00                           | 1.00           | 1.00                                             | 1.00                           | -0.24  | -0.40  | -0.24  | 1.00                           | 0.50                            | -0.49   | 0.50                                             | 1.00                           | 1.00                           | 1.00                           |
| Ion-type                | y <sub>4</sub> | y <sub>6</sub> | b <sup>+++</sup> <sub>20</sub> | b <sup>+++</sup> <sub>21</sub> | b <sup>+++</sup> <sub>21</sub> |        | sty    | b <sup>+++</sup> <sub>22</sub> | y <sub>7</sub> | b <sup>+++</sup> <sub>16</sub> | b <sup>+++</sup> <sub>24</sub> | y <sub>8</sub> | b <sup>+++</sup> <sub>18</sub> -H <sub>2</sub> O | b <sup>+++</sup> <sub>18</sub> |        |        |        | b <sup>+++</sup> <sub>19</sub> | y <sub>9</sub> -NH <sub>3</sub> |         | b <sup>+++</sup> <sub>20</sub> -H <sub>2</sub> O | b <sup>+++</sup> <sub>20</sub> | b <sup>+++</sup> <sub>21</sub> | b <sup>+++</sup> <sub>24</sub> |
| Delta Da                | 0.20           | 0.20           |                                | 0.37                           | 0.47                           |        |        |                                | 0.29           | 0.51                           | 0.72                           | 0.09           |                                                  | 0.42                           |        |        |        | 0.37                           | 0.15                            |         | 0.74                                             | 0.71                           | 0.59                           | 0.42                           |





# Peak 67

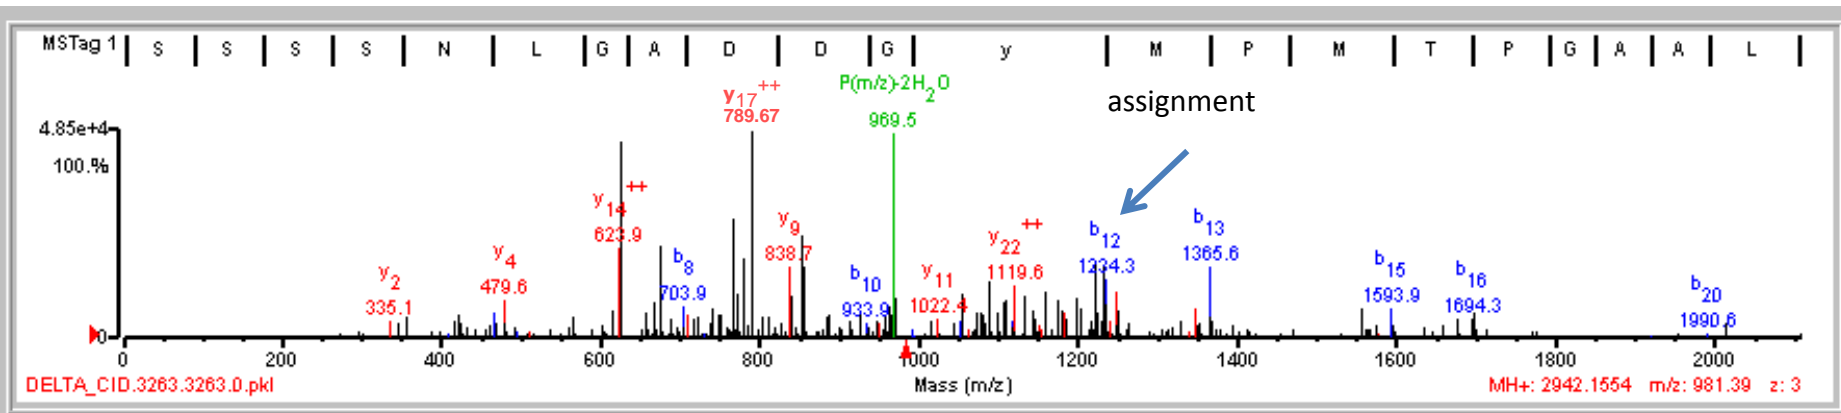

| Rank                    | Score          | SPI (%)                       | BCS                           | # Unmatched Ions | Variable sites | Sequence                                                                    | MH* Calculated (Da)             | MH* Error (Da) | MH* Error (ppm) | Protein MW/pl (Da) | Species      | Accession #              | MS-Digest Index #             | Protein Name                  |         |         |         |         |         |         |         |                                  |                 |                 |         |
|-------------------------|----------------|-------------------------------|-------------------------------|------------------|----------------|-----------------------------------------------------------------------------|---------------------------------|----------------|-----------------|--------------------|--------------|--------------------------|-------------------------------|-------------------------------|---------|---------|---------|---------|---------|---------|---------|----------------------------------|-----------------|-----------------|---------|
| 1                       | 14.84          | 74.4                          | 9                             | 6/25             | Y653y          | (R) S S S S N L G A   D D G y   M P M T / P G A A L / A   G S   G S C R (S) | 2861.21                         | 80.9420        | 331.6           | 137334.8/8.90      | Homo sapiens | <a href="#">38683860</a> | <a href="#">32967</a>         | insulin receptor substrate 2  |         |         |         |         |         |         |         |                                  |                 |                 |         |
| Fragment-ion (m/z)      | 479.63         | 623.94                        | 624.86                        | 666.83           | 675.77         | 703.88                                                                      | 749.67                          | 767.77         | 771.55          | 780.16             | 789.67       | 838.67                   | 854.84                        | 1088.60                       | 1107.49 | 1119.63 | 1160.59 | 1222.87 | 1232.58 | 1234.29 | 1247.58 | 1348.76                          | 1365.65         | 1593.92         | 1695.45 |
| Frac. Inten. (% of TIC) | 2.41           | 3.89                          | 9.10                          | 3.13             | 4.81           | 2.11                                                                        | 2.82                            | 8.23           | 2.41            | 5.27               | 10.61        | 4.65                     | 7.12                          | 3.00                          | 2.15    | 2.50    | 1.94    | 4.05    | 3.78    | 3.95    | 2.88    | 1.94                             | 5.02            | 2.68            | 2.00    |
| Rel. Inten. (% of BP)   | 22.71          | 34.78                         | 85.77                         | 29.51            | 43.47          | 19.91                                                                       | 26.60                           | 58.70          | 22.88           | 49.85              | 100.00       | 43.80                    | 67.10                         | 28.25                         | 20.26   | 23.59   | 18.26   | 38.13   | 35.47   | 37.20   | 27.17   | 18.27                            | 47.32           | 25.08           | 18.89   |
| Score                   | 1.00           | 1.00                          | 1.00                          | -0.30            | 0.25           | 1.00                                                                        | 0.50                            | 1.00           | -0.23           | -0.50              | -1.00        | 1.00                     | 1.00                          | 1.00                          | -0.20   | 1.00    | 1.00    | 0.50    | 1.00    | 1.00    | 1.00    | 1.00                             | 1.00            | 1.00            | -0.19   |
| Ion-type                | y <sub>4</sub> | y <sub>5</sub>                | y <sup>++</sup> <sub>14</sub> |                  | a <sub>3</sub> | b <sub>3</sub>                                                              | y <sub>5</sub> -NH <sub>3</sub> | y <sub>5</sub> |                 |                    |              | y <sub>9</sub>           | y <sup>++</sup> <sub>13</sub> | b <sup>++</sup> <sub>22</sub> |         |         |         |         |         |         |         | b <sub>13</sub> -NH <sub>3</sub> | b <sub>13</sub> | b <sub>15</sub> |         |
| Delta Da                | 0.43           | 0.88                          | 0.57                          |                  | -0.58          | -0.44                                                                       | -0.81                           | 0.46           |                 |                    |              | 0.32                     | 0.48                          | 0.66                          |         |         |         |         |         |         |         | 0.32                             | 0.18            | 0.38            |         |
|                         |                | y <sup>++</sup> <sub>14</sub> |                               |                  |                |                                                                             |                                 |                |                 |                    |              |                          |                               |                               |         |         |         |         |         |         |         | y <sub>15</sub>                  |                 |                 |         |
|                         |                |                               |                               |                  |                |                                                                             |                                 |                |                 |                    |              |                          |                               |                               |         |         |         |         |         |         |         | 0.13                             |                 |                 |         |

# Peak 68

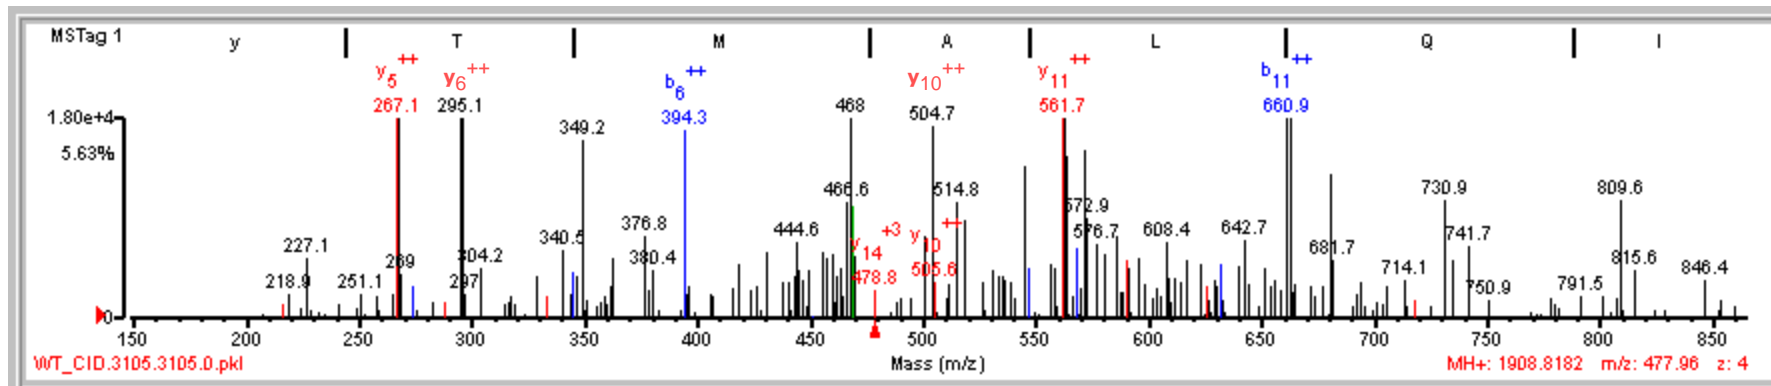

| Rank | Score | SPI (%) | BCS | # Unmatched Ions | Variable sites | Sequence                     | MH <sup>+</sup> Calculated (Da) | MH <sup>+</sup> Error (Da) | MH <sup>+</sup> Error (ppm) | Protein MW/pi (Da) | Species      | Accession #              | MS-Digest Index #     | Protein Name                 |
|------|-------|---------|-----|------------------|----------------|------------------------------|---------------------------------|----------------------------|-----------------------------|--------------------|--------------|--------------------------|-----------------------|------------------------------|
| 1    | 10.27 | 91.4    | 7   | 7/18             | Y11y1          | (R)Y/TMA/LQI/F SQGIGISSVK(L) | 1829.95                         | 78.8716                    | -573.5                      | 76731.4/5.71       | Homo sapiens | <a href="#">39777601</a> | <a href="#">19674</a> | transglutaminase 3 precursor |

| Fragment-ion (m/z)      | 267.11           | 295.12           | 349.19 | 394.31           | 444.58 | 455.85             | 460.04             | 504.66            | 533.94         | 545.65 | 556.84             | 561.70            | 572.03                           | 586.35 | 608.42 | 660.89            | 680.92 | 809.63 |
|-------------------------|------------------|------------------|--------|------------------|--------|--------------------|--------------------|-------------------|----------------|--------|--------------------|-------------------|----------------------------------|--------|--------|-------------------|--------|--------|
| Frac. Inten. (% of TIC) | 18.66            | 9.11             | 1.39   | 2.14             | 1.21   | 0.93               | 0.89               | 1.76              | 0.93           | 1.51   | 0.97               | 16.01             | 1.99                             | 1.01   | 1.00   | 38.03             | 1.51   | 0.95   |
| Rel. Inten. (% of BP)   | 49.07            | 23.97            | 3.65   | 5.63             | 3.19   | 2.45               | 2.35               | 4.64              | 2.44           | 3.96   | 2.56               | 42.10             | 5.22                             | 2.66   | 2.63   | 100.00            | 3.97   | 2.50   |
| Score                   | 1.00             | 1.00             | -0.04  | 1.00             | -0.03  | 1.00               | 1.00               | 1.00              | 1.00           | -0.04  | 1.00               | 1.00              | 0.50                             | -0.03  | -0.03  | 1.00              | -0.04  | -0.02  |
| Ion-type                | y <sup>++5</sup> | y <sup>++6</sup> |        | b <sup>++6</sup> |        | y <sup>+++13</sup> | b <sup>+++12</sup> | y <sup>++10</sup> | y <sup>5</sup> |        | y <sup>+++16</sup> | y <sup>++11</sup> | y <sup>6</sup> -H <sub>2</sub> O |        |        | b <sup>5</sup>    |        |        |
| Delta Da                | -0.06            | -0.56            |        | -0.35            |        | 0.59               | 0.17               | -0.61             | 0.61           |        | 0.54               | -0.11             | -0.31                            |        |        | 0.64              |        |        |
|                         |                  |                  |        |                  |        |                    |                    |                   |                |        |                    |                   |                                  |        |        | b <sup>++11</sup> |        |        |
|                         |                  |                  |        |                  |        |                    |                    |                   |                |        |                    |                   |                                  |        |        | 0.10              |        |        |

# Peak 69

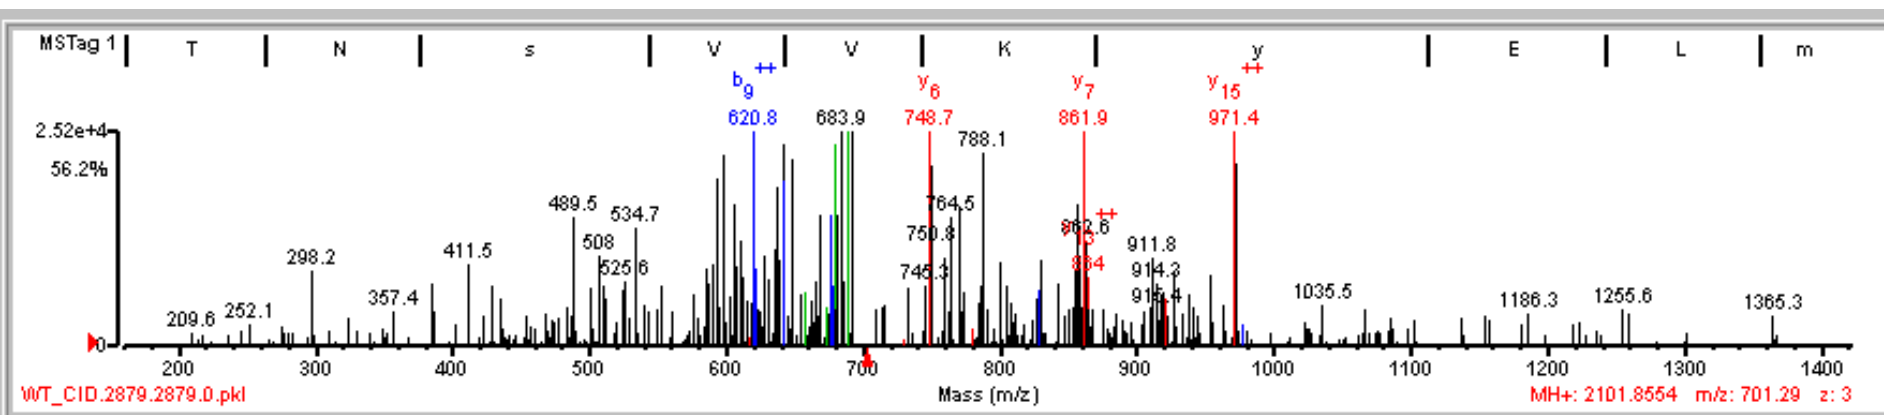

| Rank                    | Score  | SPI (%) | BCS                | # Unmatched Ions | Variable sites    | Sequence                                   | MH <sup>+</sup> Calculated (Da)     | MH <sup>+</sup> Error (Da) | MH <sup>+</sup> Error (ppm) | Protein MW/pI (Da) | Species      | Accession #                          | MS-Digest Index #    | Protein Name                                     |                    |                                   |        |        |                |        |        |                    |        |                |                    |
|-------------------------|--------|---------|--------------------|------------------|-------------------|--------------------------------------------|-------------------------------------|----------------------------|-----------------------------|--------------------|--------------|--------------------------------------|----------------------|--------------------------------------------------|--------------------|-----------------------------------|--------|--------|----------------|--------|--------|--------------------|--------|----------------|--------------------|
| 1                       | 11.00  | 59.2    | 7                  | 11/25            | M532m T523t Y529y | (R) C/t N S V\ V/K Y E\ L m R\ P/S N K (A) | 1925.96                             | 175.8983                   | -13.9                       | 138254.5/5.61      | Homo sapiens | <a href="#">40217808</a>             | <a href="#">7072</a> | euchromatic histone-lysine N-methyltransferase 1 |                    |                                   |        |        |                |        |        |                    |        |                |                    |
| Fragment-ion (m/z)      | 489.52 | 534.66  | 585.91             | 593.76           | 598.01            | 606.87                                     | 611.73                              | 620.82                     | 635.69                      | 641.57             | 647.90       | 668.37                               | 677.40               | 679.73                                           | 681.95             | 683.88                            | 691.94 | 748.69 | 764.52         | 770.64 | 788.11 | 829.50             | 856.44 | 861.86         | 971.42             |
| Frac. Inten. (% of TIC) | 2.40   | 2.21    | 3.24               | 3.05             | 5.16              | 3.82                                       | 2.99                                | 5.65                       | 0.13                        | 6.08               | 3.09         | 0.10                                 | 3.16                 | 0.12                                             | 2.17               | 4.28                              | 9.58   | 10.88  | 2.25           | 2.90   | 3.18   | 2.37               | 3.13   | 9.59           | 8.47               |
| Rel. Inten. (% of BP)   | 22.08  | 20.31   | 29.77              | 28.06            | 47.46             | 35.08                                      | 27.52                               | 51.91                      | 1.17                        | 55.94              | 28.38        | 0.89                                 | 29.09                | 1.09                                             | 19.93              | 39.31                             | 88.08  | 100.00 | 20.70          | 26.67  | 29.19  | 21.82              | 28.78  | 88.21          | 77.91              |
| Score                   | -0.22  | -0.20   | 1.00               | -0.28            | -0.47             | -0.35                                      | 0.50                                | 1.00                       | 1.00                        | 1.00               | -0.28        | 1.50                                 | 2.00                 | 1.00                                             | 0.25               | -0.88                             | 1.00   | -0.21  | -0.27          | -0.29  | -0.29  | 1.00               | -0.29  | 1.00           | 1.00               |
| Ion-type                |        |         | b+++ <sub>13</sub> |                  |                   |                                            | b+++ <sub>9</sub> -H <sub>2</sub> O | b+++ <sub>9</sub>          | st                          | b <sub>5</sub>     |              | b+++ <sub>10</sub> -H <sub>2</sub> O | b+++ <sub>10</sub>   | m                                                | y+++ <sub>10</sub> | y <sub>6</sub> -SOCH <sub>4</sub> |        |        | y <sub>6</sub> |        |        | b+++ <sub>12</sub> |        | y <sub>7</sub> | y+++ <sub>15</sub> |
| Delta Da                |        |         | 0.34               |                  |                   |                                            | -0.48                               | -0.40                      | -0.29                       | -0.63              |              | -0.39                                | -0.36                | -0.24                                            | 0.63               | -0.50                             |        | 0.31   |                |        | 0.17   |                    | 0.40   | -0.01          |                    |



# Peak 71

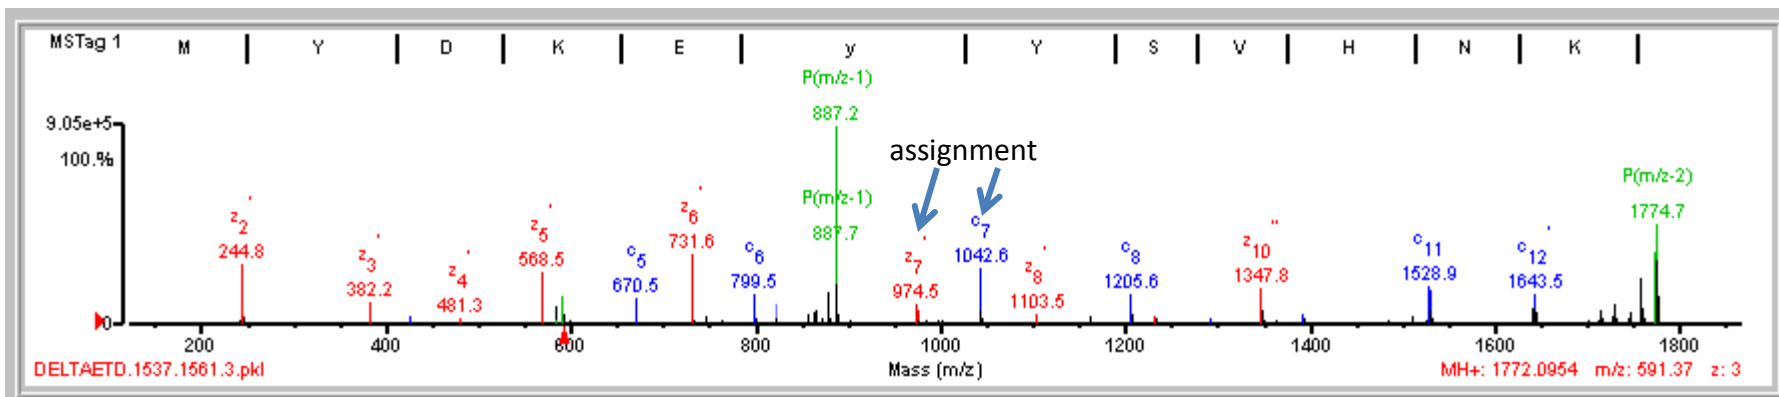

| Rank                    | Score | SPI (%)          | BCS              | # Unmatched Ions | Variable sites   | Sequence                          | MH <sup>+</sup> Calculated (Da) | MH <sup>+</sup> Error (Da) | MH <sup>+</sup> Error (ppm) | Protein MW/pI (Da) | Species           | Accession #              | MS-Digest Index #     | Protein Name                 |         |                |                   |                |                   |                 |                    |                 |                 |                   |         |       |
|-------------------------|-------|------------------|------------------|------------------|------------------|-----------------------------------|---------------------------------|----------------------------|-----------------------------|--------------------|-------------------|--------------------------|-----------------------|------------------------------|---------|----------------|-------------------|----------------|-------------------|-----------------|--------------------|-----------------|-----------------|-------------------|---------|-------|
| 1                       | 17.06 | 95.6             | 12               | 2/24             | Y1234y           | (R) D/M/Y/D/K/E Y Y S/V H N/K (T) | 1691.74                         | 80.3584                    | 221.3                       | 155542.2/7.02      | Homo sapiens      | <a href="#">42741655</a> | <a href="#">21037</a> | met proto-oncogene precursor |         |                |                   |                |                   |                 |                    |                 |                 |                   |         |       |
| Fragment-ion (m/z)      |       | 244.79           | 382.24           | 427.08           | 568.50           | 584.56                            | 670.49                          | 731.57                     | 747.55                      | 799.54             | 822.02            | 974.48                   | 1042.57               | 1103.52                      | 1161.66 | 1205.64        | 1232.76           | 1292.57        | 1347.77           | 1391.69         | 1510.52            | 1528.94         | 1642.12         | 1643.52           | 1645.28 |       |
| Frac. Inten. (% of TIC) |       | 7.56             | 2.74             | 1.05             | 7.17             | 1.77                              | 3.38                            | 9.09                       | 1.05                        | 4.07               | 2.80              | 3.88                     | 10.00                 | 2.40                         | 1.10    | 6.94           | 1.65              | 1.41           | 6.67              | 2.83            | 2.09               | 9.71            | 2.83            | 4.49              | 3.32    |       |
| Rel. Inten. (% of BP)   |       | 75.55            | 27.44            | 10.47            | 71.65            | 17.74                             | 33.78                           | 90.86                      | 10.47                       | 40.68              | 28.03             | 38.79                    | 100.00                | 23.99                        | 11.03   | 69.33          | 16.54             | 14.10          | 66.64             | 28.29           | 20.86              | 97.04           | 28.25           | 44.91             | 33.19   |       |
| Score                   |       | 1.00             | 1.00             | 1.00             | 1.00             | 0.25                              | 1.00                            | 1.00                       | 0.25                        | 1.00               | 1.00              | 1.00                     | 1.00                  | 1.00                         | -0.11   | 1.00           | 0.25              | 1.00           | 0.25              | 1.00            | 0.25               | 1.00            | 1.00            | 1.00              | 0.25    | -0.33 |
| Ion-type                |       | z <sub>2</sub> ' | z <sub>3</sub> ' | c <sub>3</sub>   | z <sub>5</sub> ' | y <sub>5</sub>                    | c <sub>5</sub>                  | z <sub>6</sub> '           | y <sub>6</sub>              | c <sub>6</sub>     | c <sub>++12</sub> | z <sub>7</sub> '         | c <sub>7</sub>        | z <sub>8</sub> '             |         | c <sub>8</sub> | z <sub>9</sub> '' | c <sub>9</sub> | z <sub>10</sub> ' | c <sub>10</sub> | z <sub>11</sub> '' | c <sub>11</sub> | c <sub>12</sub> | c <sub>12</sub> ' |         |       |
| Delta Da                |       | -0.35            | 0.04             | -0.08            | 0.20             | 0.24                              | 0.20                            | 0.21                       | 0.17                        | 0.21               | 0.20              | 0.09                     | 0.21                  | 0.09                         |         | 0.22           | 0.23              | 0.12           | 0.21              | 0.17            | -0.11              | 0.36            | -0.50           | -0.11             |         |       |
|                         |       |                  |                  |                  |                  |                                   |                                 |                            |                             |                    | z <sub>++12</sub> |                          |                       |                              |         |                |                   |                |                   |                 |                    |                 | 0.45            |                   |         |       |

# Peak 72

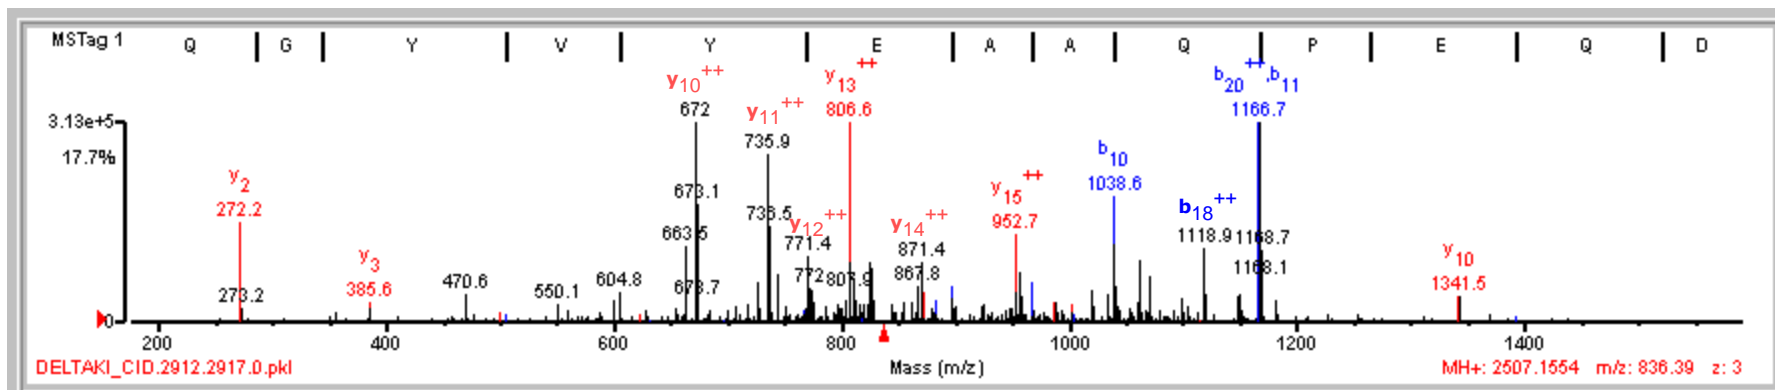

| Rank                    | Score          | SPI (%) | BCS                           | # Unmatched Ions | Variable sites                | Sequence                                                              | MH <sup>+</sup> Calculated (Da) | MH <sup>+</sup> Error (Da)    | MH <sup>+</sup> Error (ppm) | Protein MW/pl (Da) | Species                       | Accession #              | MS-Digest Index #             | Protein Name                             |                |        |                |                                   |                 |                               |                               |                                   |                 |                 |
|-------------------------|----------------|---------|-------------------------------|------------------|-------------------------------|-----------------------------------------------------------------------|---------------------------------|-------------------------------|-----------------------------|--------------------|-------------------------------|--------------------------|-------------------------------|------------------------------------------|----------------|--------|----------------|-----------------------------------|-----------------|-------------------------------|-------------------------------|-----------------------------------|-----------------|-----------------|
| 1                       | 16.68          | 89.4    | 10                            | 6/24             | Y234y                         | (R) V G Q G Y V / Y / E   A   A   Q   P E Q / D E / Y D \ I P \ R (H) | 2427.11                         | 80.0455                       | 31.6                        | 93372.3/5.41       | Homo sapiens                  | <a href="#">44662836</a> | <a href="#">2165</a>          | breast cancer anti-estrogen resistance 1 |                |        |                |                                   |                 |                               |                               |                                   |                 |                 |
| Fragment-ion (m/z)      | 272.22         | 663.49  | 672.04                        | 727.11           | 735.94                        | 743.81                                                                | 771.42                          | 806.65                        | 811.76                      | 827.23             | 871.42                        | 896.55                   | 952.71                        | 957.38                                   | 967.54         | 987.55 | 1020.41        | 1038.59                           | 1062.47         | 1070.51                       | 1118.92                       | 1148.54                           | 1166.68         | 1341.51         |
| Frac. Inten. (% of TIC) | 2.24           | 1.81    | 33.28                         | 1.86             | 6.28                          | 1.32                                                                  | 2.39                            | 6.55                          | 2.02                        | 1.57               | 2.21                          | 1.48                     | 3.50                          | 1.74                                     | 1.05           | 1.30   | 1.44           | 4.72                              | 1.44            | 1.60                          | 2.36                          | 1.46                              | 15.17           | 1.23            |
| Rel. Inten. (% of BP)   | 6.74           | 5.44    | 100.00                        | 5.58             | 18.86                         | 3.97                                                                  | 7.18                            | 19.67                         | 6.06                        | 4.71               | 6.63                          | 4.45                     | 10.51                         | 5.22                                     | 3.16           | 3.91   | 4.32           | 14.19                             | 4.33            | 4.82                          | 7.09                          | 4.39                              | 45.57           | 3.69            |
| Score                   | 1.00           | -0.05   |                               | -0.06            | 1.00                          | 1.00                                                                  | 1.00                            | 1.00                          | -0.06                       | -0.05              | 1.00                          | 1.00                     | 1.00                          | -0.05                                    | 1.00           | 1.00   | 0.50           | 1.00                              | 1.00            | -0.05                         | 1.00                          | 0.50                              | 1.00            | 1.00            |
| Ion-type                | y <sub>2</sub> |         | y <sup>++</sup> <sub>10</sub> |                  | y <sup>++</sup> <sub>11</sub> | y <sub>5</sub>                                                        | y <sup>++</sup> <sub>12</sub>   | y <sup>++</sup> <sub>13</sub> |                             |                    | y <sup>++</sup> <sub>14</sub> | b <sub>8</sub>           | y <sup>++</sup> <sub>15</sub> |                                          | b <sub>9</sub> |        | y <sub>7</sub> | b <sub>10</sub> -H <sub>2</sub> O | b <sub>10</sub> | b <sup>++</sup> <sub>18</sub> | b <sup>++</sup> <sub>19</sub> | b <sub>11</sub> -H <sub>2</sub> O | b <sub>11</sub> | y <sub>10</sub> |
| Delta Da                | 0.05           |         | 0.77                          |                  | 0.64                          | 0.50                                                                  | 0.60                            | 0.31                          |                             |                    | 0.56                          | 0.14                     | 0.32                          |                                          | 0.09           | 0.17   | -0.07          | 0.10                              | 0.55            | 0.46                          | 0.00                          | 0.13                              | -0.03           |                 |
|                         |                |         |                               |                  |                               |                                                                       |                                 |                               |                             |                    |                               |                          |                               |                                          |                |        |                |                                   |                 |                               |                               | b <sup>++</sup> <sub>20</sub>     |                 |                 |

# Peak 73

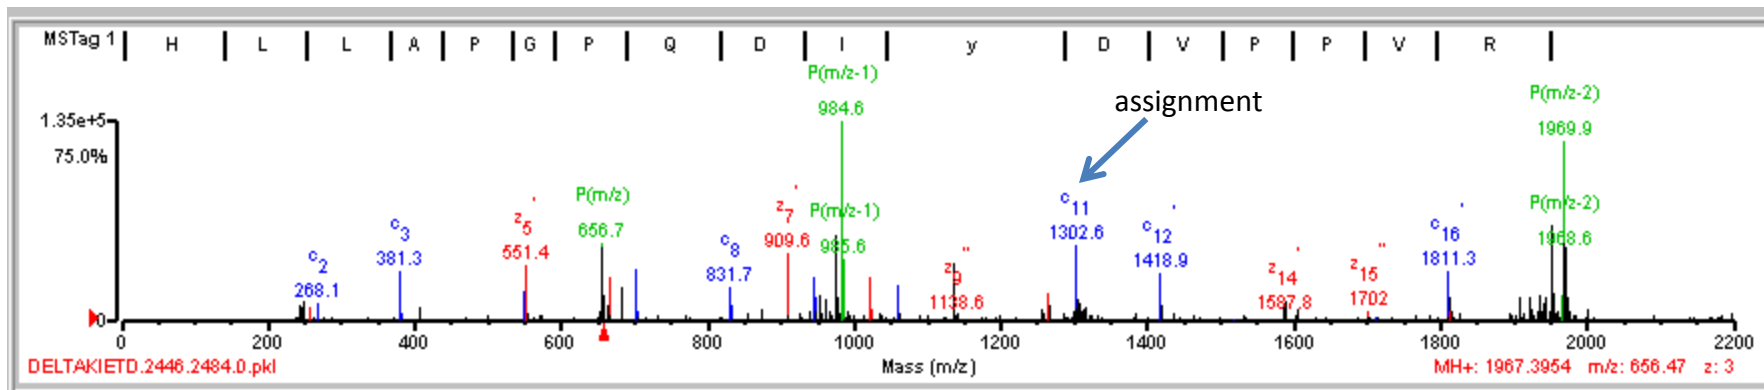

| Rank                    | Score  | SPI (%) | BCS            | # Unmatched Ions | Variable sites | Sequence                                | MH <sup>+</sup> Calculated (Da) | MH <sup>+</sup> Error (Da) | MH <sup>+</sup> Error (ppm) | Protein MW/pi (Da) | Species        | Accession #              | MS-Digest Index #    | Protein Name                             |                 |                 |         |         |                 |                 |                 |                 |                 |                 |                 |
|-------------------------|--------|---------|----------------|------------------|----------------|-----------------------------------------|---------------------------------|----------------------------|-----------------------------|--------------------|----------------|--------------------------|----------------------|------------------------------------------|-----------------|-----------------|---------|---------|-----------------|-----------------|-----------------|-----------------|-----------------|-----------------|-----------------|
| 1                       | 15.91  | 89.4    | 10             | 4/25             | Y249y          | (R)H/L L A P G P Q D I y D V P P V R(G) | 1887.01                         | 80.3831                    | 211.9                       | 93372.3/5.41       | Homo sapiens   | <a href="#">44662836</a> | <a href="#">2165</a> | breast cancer anti-estrogen resistance 1 |                 |                 |         |         |                 |                 |                 |                 |                 |                 |                 |
| Fragment-ion (m/z)      | 245.44 | 248.92  | 381.26         | 549.45           | 551.42         | 666.40                                  | 682.52                          | 703.37                     | 831.66                      | 909.59             | 946.65         | 1022.57                  | 1059.69              | 1137.99                                  | 1265.80         | 1302.65         | 1305.31 | 1309.03 | 1417.91         | 1418.88         | 1420.95         | 1588.21         | 1810.56         | 1811.27         | 1814.85         |
| Frac. Inten. (% of TIC) | 2.50   | 2.90    | 4.02           | 2.39             | 5.34           | 5.00                                    | 2.74                            | 4.65                       | 4.03                        | 5.97               | 6.70           | 3.92                     | 5.85                 | 5.05                                     | 3.56            | 7.92            | 2.34    | 2.88    | 1.93            | 5.07            | 2.35            | 1.78            | 2.54            | 6.52            | 2.05            |
| Rel. Inten. (% of BP)   | 31.62  | 36.60   | 50.77          | 30.19            | 67.50          | 63.20                                   | 34.63                           | 58.72                      | 50.95                       | 75.40              | 84.59          | 49.47                    | 73.95                | 63.82                                    | 44.93           | 100.00          | 29.62   | 36.33   | 24.44           | 64.02           | 29.68           | 22.50           | 32.08           | 82.37           | 25.95           |
| Score                   |        | -0.32   | -0.37          | 1.00             | 1.00           | 1.00                                    | 0.25                            | 1.00                       | 1.00                        | 1.00               | 1.00           | 1.00                     | 1.00                 | 1.00                                     | 1.00            | 1.00            | -0.30   | -0.36   | 1.00            | 0.25            | 0.25            | 1.00            | 1.00            | 0.25            | 0.25            |
| Ion-type                |        |         | c <sub>3</sub> | c <sub>5</sub>   | z <sub>5</sub> | z <sub>6</sub>                          | y <sub>6</sub>                  | c <sub>7</sub>             | c <sub>8</sub>              | z <sub>7</sub>     | c <sub>9</sub> | z <sub>8</sub>           | c <sub>10</sub>      | z <sub>9</sub>                           | z <sub>10</sub> | c <sub>11</sub> |         |         | c <sub>12</sub> | c <sub>12</sub> | z <sub>12</sub> | z <sub>14</sub> | c <sub>16</sub> | c <sub>16</sub> | z <sub>18</sub> |
| Delta Da                |        |         | -0.00          | 0.10             | 0.08           | 0.03                                    | 0.13                            | -0.05                      | 0.18                        | 0.19               | 0.14           | 0.09                     | 0.10                 | 0.48                                     | 0.23            | 0.03            |         |         | 0.26            | 0.22            | 0.30            | 0.48            | 0.67            | 0.37            | -0.06           |



# Peak 74

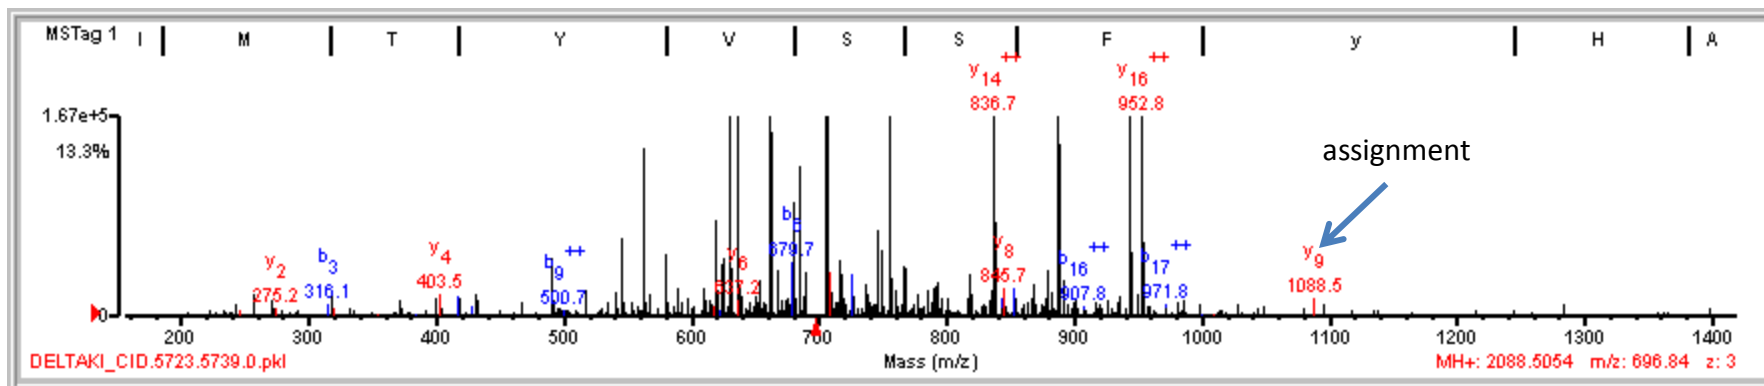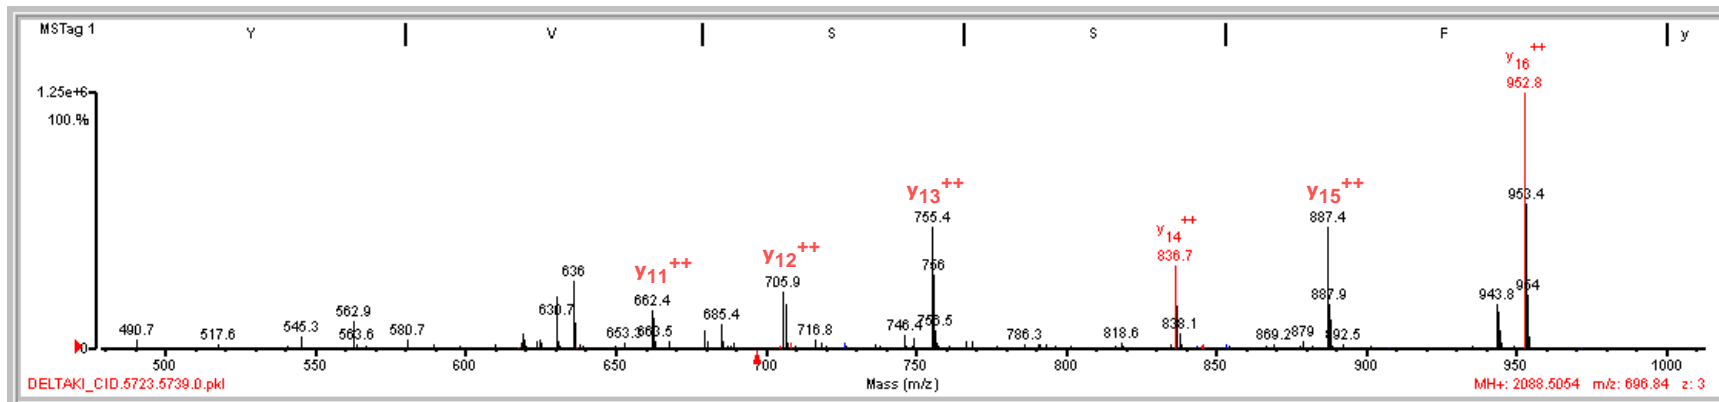

| Rank                    | Score          | SPI (%)                      | BCS                              | # Unmatched Ions | Variable sites                   | Sequence                                    | MH <sup>+</sup> Calculated (Da) | MH <sup>+</sup> Error (Da)     | MH <sup>+</sup> Error (ppm)                      | Protein MW/pl (Da)             | Species        | Accession #                    | MS-Digest Index #              | Protein Name                                     |        |                                |                |                                |                                |        |                                |                                                  |                                                  |                                |
|-------------------------|----------------|------------------------------|----------------------------------|------------------|----------------------------------|---------------------------------------------|---------------------------------|--------------------------------|--------------------------------------------------|--------------------------------|----------------|--------------------------------|--------------------------------|--------------------------------------------------|--------|--------------------------------|----------------|--------------------------------|--------------------------------|--------|--------------------------------|--------------------------------------------------|--------------------------------------------------|--------------------------------|
| 1                       | 16.69          | 92.2                         | 10                               | 4/24             | Y246y                            | (K) A I/M/T/Y V S F/Y H A\F/S G A Q K (A)   | 2007.96                         | 80.5421                        | 275.7                                            | 103058.1/5.25                  | Homo sapiens   | <a href="#">4501891</a>        | <a href="#">11345</a>          | actinin, alpha 1                                 |        |                                |                |                                |                                |        |                                |                                                  |                                                  |                                |
| 1                       | 16.69          | 92.2                         | 10                               | 4/24             | Y265y                            | (K) A I/M/T/Y V S S F/Y H A\F/S G A Q K (A) | 2007.96                         | 80.5421                        | 275.7                                            | 104854.6/5.27                  | Homo sapiens   | <a href="#">12025678</a>       | <a href="#">25384</a>          | actinin, alpha 4                                 |        |                                |                |                                |                                |        |                                |                                                  |                                                  |                                |
| Fragment-ion (m/z)      | 490.70         | 545.32                       | 562.86                           | 580.73           | 619.23                           | 624.98                                      | 630.37                          | 636.04                         | 653.28                                           | 662.39                         | 679.96         | 705.90                         | 726.46                         | 746.39                                           | 749.21 | 755.45                         | 766.90         | 836.73                         | 843.57                         | 879.02 | 887.35                         | 943.75                                           | 944.03                                           | 952.80                         |
| Frac. Inten. (% of TIC) | 0.77           | 1.08                         | 2.02                             | 0.83             | 1.80                             | 0.96                                        | 5.30                            | 5.72                           | 0.68                                             | 4.27                           | 1.75           | 6.47                           | 0.64                           | 1.03                                             | 0.93   | 12.07                          | 0.66           | 8.05                           | 0.62                           | 0.63   | 10.88                          | 2.44                                             | 5.32                                             | 25.06                          |
| Rel. Inten. (% of BP)   | 3.09           | 4.31                         | 8.06                             | 3.31             | 7.18                             | 3.82                                        | 21.13                           | 22.83                          | 2.73                                             | 17.05                          | 6.99           | 25.81                          | 2.57                           | 4.11                                             | 3.70   | 48.18                          | 2.65           | 32.14                          | 2.49                           | 2.50   | 43.40                          | 9.73                                             | 21.21                                            | 100.00                         |
| Score                   | 1.00           | 1.00                         | 0.50                             | 1.00             | 0.50                             | -0.04                                       | -0.21                           | 1.00                           | 0.50                                             | 1.00                           | 1.00           | 1.00                           | 1.00                           | 0.50                                             | -0.04  | 1.00                           | 1.00           | 1.00                           | 1.00                           | -0.03  | 1.00                           | 0.50                                             | 0.50                                             | 1.00                           |
| Ion-type                | y <sub>5</sub> | y <sup>++</sup> <sub>3</sub> | b <sub>5</sub> -H <sub>2</sub> O | b <sub>5</sub>   | y <sub>6</sub> -H <sub>2</sub> O |                                             |                                 | y <sup>+++</sup> <sub>16</sub> | y <sup>+++</sup> <sub>11</sub> -H <sub>2</sub> O | y <sup>+++</sup> <sub>11</sub> | b <sub>9</sub> | y <sup>+++</sup> <sub>12</sub> | b <sup>+++</sup> <sub>12</sub> | y <sup>+++</sup> <sub>13</sub> -H <sub>2</sub> O |        | y <sup>+++</sup> <sub>13</sub> | b <sub>7</sub> | y <sup>+++</sup> <sub>14</sub> | b <sup>+++</sup> <sub>14</sub> |        | y <sup>+++</sup> <sub>15</sub> | y <sup>+++</sup> <sub>16</sub> -H <sub>2</sub> O | y <sup>+++</sup> <sub>16</sub> -H <sub>2</sub> O | y <sup>+++</sup> <sub>16</sub> |
| Delta Da                | 0.44           | 0.59                         | 0.59                             | 0.45             | -0.09                            |                                             |                                 | 0.77                           | 0.50                                             | 0.61                           | 0.61           | 0.60                           | 0.15                           | 0.56                                             |        | 0.62                           | 0.52           | 0.37                           | 0.21                           |        | 0.46                           | 0.35                                             | 0.63                                             | 0.39                           |

# Peak 75

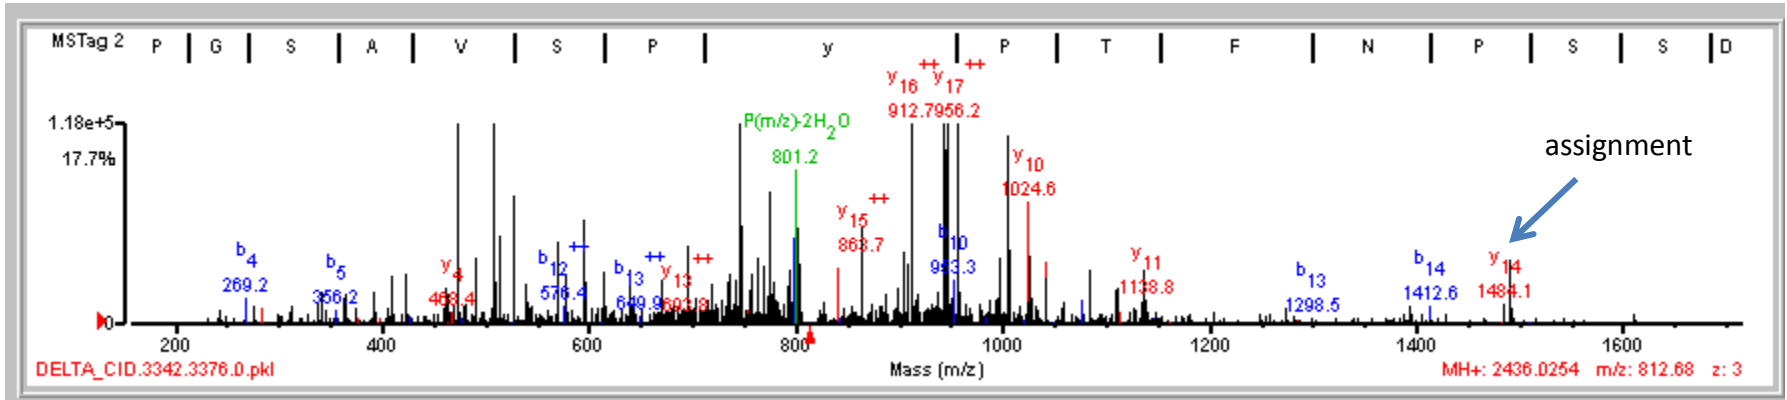

| Rank                    | Score                            | SPI (%) | BCS                              | # Unmatched Ions | Variable sites                   | Sequence                                                | MH <sup>+</sup> Calculated (Da) | MH <sup>+</sup> Error (Da)      | MH <sup>+</sup> Error (ppm) | Protein MW/pi (Da)             | Species                        | Accession #             | MS-Digest Index #     | Protein Name                   |        |                                                 |                               |        |                                                 |                               |                                                 |                               |                 |                               |         |
|-------------------------|----------------------------------|---------|----------------------------------|------------------|----------------------------------|---------------------------------------------------------|---------------------------------|---------------------------------|-----------------------------|--------------------------------|--------------------------------|-------------------------|-----------------------|--------------------------------|--------|-------------------------------------------------|-------------------------------|--------|-------------------------------------------------|-------------------------------|-------------------------------------------------|-------------------------------|-----------------|-------------------------------|---------|
| 1                       | 12.35                            | 72.6    | 9                                | 8/25             | Y39y                             | (K) G/G/P/G/S/A/V/S/P/y P T F N P S S D/V A A L H K (A) | 2356.16                         | 79.8686                         | -40.1                       | 38714.5/6.57                   | Homo sapiens                   | <a href="#">4502101</a> | <a href="#">17408</a> | annexin I                      |        |                                                 |                               |        |                                                 |                               |                                                 |                               |                 |                               |         |
| Fragment-ion (m/z)      | 409.41                           | 472.69  | 508.62                           | 526.79           | 595.87                           | 638.98                                                  | 696.41                          | 736.78                          | 745.93                      | 775.30                         | 793.92                         | 803.00                  | 804.05                | 863.69                         | 864.61 | 903.83                                          | 912.69                        | 943.60 | 947.56                                          | 956.20                        | 996.98                                          | 1006.05                       | 1024.56         | 1041.22                       | 1489.88 |
| Frac. Inten. (% of TIC) | 1.30                             | 4.19    | 3.79                             | 2.16             | 2.07                             | 1.71                                                    | 1.52                            | 1.95                            | 9.07                        | 3.01                           | 1.73                           | 1.41                    | 1.73                  | 1.36                           | 1.77   | 1.91                                            | 12.41                         | 6.00   | 4.26                                            | 23.94                         | 2.36                                            | 3.70                          | 2.84            | 2.06                          | 1.77    |
| Rel. Inten. (% of BP)   | 5.44                             | 17.50   | 15.82                            | 9.03             | 8.64                             | 7.12                                                    | 6.33                            | 8.15                            | 37.88                       | 12.56                          | 7.23                           | 5.91                    | 7.24                  | 5.70                           | 7.38   | 7.97                                            | 51.84                         | 25.05  | 17.80                                           | 100.00                        | 9.85                                            | 15.44                         | 11.87           | 8.62                          | 7.38    |
| Score                   | 0.50                             | -0.17   | 0.50                             | 1.00             | 0.50                             | 1.00                                                    | -0.06                           | 0.50                            | -0.38                       | 1.00                           | 1.00                           | -0.06                   | -0.07                 | 1.00                           | -0.07  | 0.50                                            | 1.00                          | -0.25  | 0.50                                            | 1.00                          | 0.50                                            | 1.00                          | 1.00            | 1.00                          | -0.07   |
| Ion-type                | b <sub>6</sub> -H <sub>2</sub> O |         | b <sub>7</sub> -H <sub>2</sub> O | b <sub>7</sub>   | b <sub>8</sub> -H <sub>2</sub> O | y <sub>6</sub>                                          |                                 | y <sub>7</sub> -NH <sub>3</sub> |                             | y <sup>+++</sup> <sub>22</sub> | y <sup>+++</sup> <sub>23</sub> |                         |                       | y <sup>+++</sup> <sub>15</sub> |        | y <sup>++</sup> <sub>16</sub> -H <sub>2</sub> O | y <sup>++</sup> <sub>16</sub> |        | y <sup>++</sup> <sub>17</sub> -H <sub>2</sub> O | y <sup>++</sup> <sub>17</sub> | y <sup>++</sup> <sub>18</sub> -H <sub>2</sub> O | y <sup>++</sup> <sub>18</sub> | y <sub>10</sub> | y <sup>++</sup> <sub>19</sub> |         |
| Delta Da                | 0.23                             |         | 0.37                             | 0.53             | 0.59                             | 0.58                                                    |                                 | 0.38                            |                             | 0.60                           | 0.21                           |                         |                       | -0.21                          |        | 0.41                                            | 0.27                          |        | 0.63                                            | 0.26                          | 0.51                                            | 0.58                          | 0.02            | 0.23                          |         |
|                         |                                  |         |                                  |                  |                                  |                                                         |                                 |                                 |                             |                                |                                |                         |                       |                                |        |                                                 |                               |        |                                                 |                               | y <sub>10</sub> -H <sub>2</sub> O               |                               |                 |                               |         |
|                         |                                  |         |                                  |                  |                                  |                                                         |                                 |                                 |                             |                                |                                |                         |                       |                                |        |                                                 |                               |        |                                                 |                               | -0.48                                           |                               |                 |                               |         |

# Peak 76

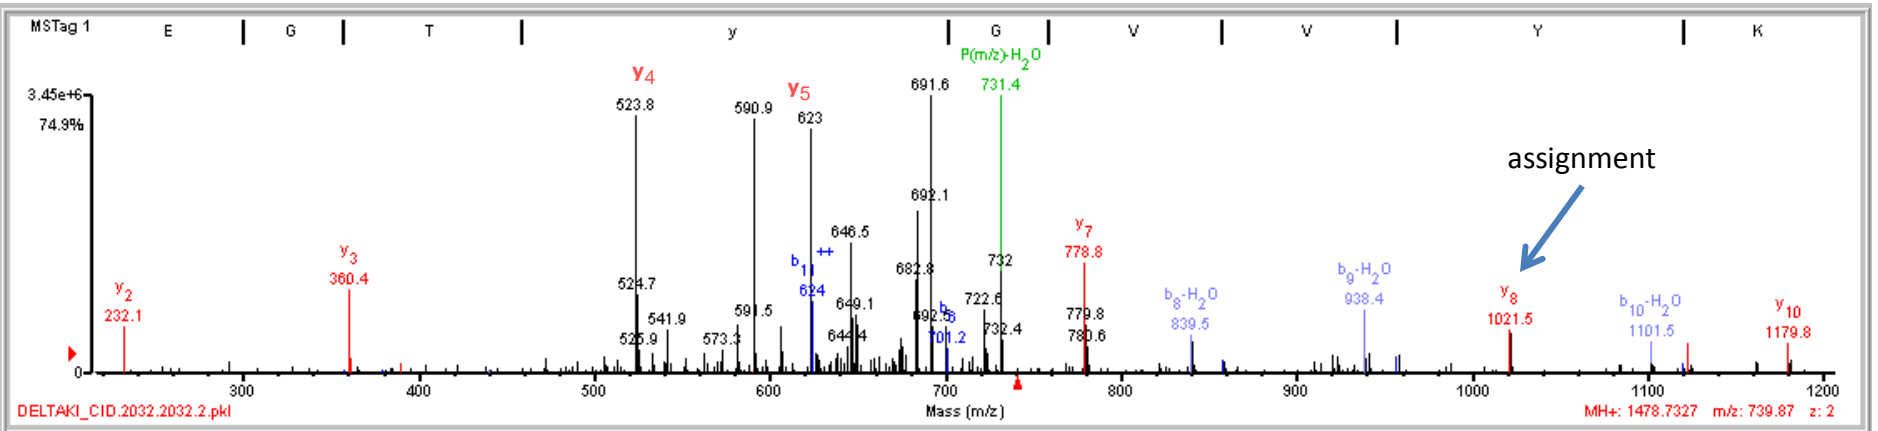

| Rank | Score | SPI (%) | BCS | # Unmatched Ions | Variable sites | Sequence                            | MH <sup>+</sup> Calculated (Da) | MH <sup>+</sup> Error (Da) | MH <sup>+</sup> Error (ppm) | Protein MW/pi (Da) | Species      | Accession #              | MS-Digest Index #     | Protein Name                            |
|------|-------|---------|-----|------------------|----------------|-------------------------------------|---------------------------------|----------------------------|-----------------------------|--------------------|--------------|--------------------------|-----------------------|-----------------------------------------|
| 1    | 13.88 | 79.6    | 8   | 7/25             | Y15y           | (K) I/G E/G T/Y I/G V/V/Y/K/G R (H) | 1398.74                         | 79.9951                    | 19.5                        | 34095.6/8.37       | Homo sapiens | <a href="#">4502709</a>  | <a href="#">3565</a>  | cell division cycle 2 protein isoform 1 |
| 1    | 13.88 | 79.6    | 8   | 7/25             | Y15y           | (K) I/G E/G T/Y I/G V/V/Y/K/G R (H) | 1398.74                         | 79.9951                    | 19.5                        | 27502.9/6.54       | Homo sapiens | <a href="#">16306492</a> | <a href="#">13150</a> | cell division cycle 2 protein isoform 2 |

  

| Fragment-ion (m/z)      | 232.12         | 360.36         | 505.60                          | 523.80         | 541.86 | 582.05                                          | 590.91                        | 606.70 | 623.01         | 626.13 | 637.46 | 646.47 | 649.13 | 669.58 | 674.84                                          | 682.79                           | 683.76                           | 691.55 | 700.62         | 778.82         | 839.52                           | 938.42                           | 1021.53        | 1101.53                           | 1179.84         |
|-------------------------|----------------|----------------|---------------------------------|----------------|--------|-------------------------------------------------|-------------------------------|--------|----------------|--------|--------|--------|--------|--------|-------------------------------------------------|----------------------------------|----------------------------------|--------|----------------|----------------|----------------------------------|----------------------------------|----------------|-----------------------------------|-----------------|
| Frac. Inten. (% of TIC) | 1.66           | 3.45           | 1.21                            | 12.60          | 2.18   | 2.53                                            | 11.33                         | 2.74   | 11.30          | 2.06   | 1.38   | 7.06   | 3.65   | 1.29   | 2.30                                            | 3.23                             | 6.66                             | 0.61   | 2.94           | 6.74           | 2.95                             | 2.84                             | 3.26           | 2.05                              | 1.99            |
| Rel. Inten. (% of BP)   | 13.18          | 27.38          | 9.59                            | 100.00         | 17.34  | 20.07                                           | 89.96                         | 21.75  | 89.68          | 16.35  | 10.96  | 56.01  | 28.99  | 10.22  | 18.23                                           | 25.64                            | 52.91                            | 4.85   | 23.35          | 53.49          | 23.42                            | 22.53                            | 25.86          | 16.26                             | 15.83           |
| Score                   | 1.00           | 1.00           | 0.50                            | 1.00           | -0.17  | 0.50                                            | 1.00                          | -0.22  | 1.00           | -0.16  | -0.11  | -0.56  | -0.29  | -0.10  | 0.50                                            | 1.00                             | 1.00                             | 1.50   | 1.00           | 1.00           | 0.50                             | 1.00                             | 0.50           | 1.00                              | 1.00            |
| Ion-type                | y <sub>2</sub> | y <sub>3</sub> | y <sub>4</sub> -NH <sub>3</sub> | y <sub>4</sub> |        | y <sup>++</sup> <sub>10</sub> -H <sub>2</sub> O | y <sup>++</sup> <sub>10</sub> |        | y <sub>5</sub> |        |        |        |        |        | y <sup>++</sup> <sub>12</sub> -H <sub>2</sub> O | b <sub>6</sub> -H <sub>2</sub> O | b <sub>6</sub> -H <sub>2</sub> O | sty    | b <sub>6</sub> | y <sub>7</sub> | b <sub>8</sub> -H <sub>2</sub> O | b <sub>9</sub> -H <sub>2</sub> O | y <sub>8</sub> | b <sub>10</sub> -H <sub>2</sub> O | y <sub>10</sub> |
| Delta Da                | -0.02          | 0.12           | -0.67                           | 0.50           |        | 0.77                                            | 0.63                          |        | 0.64           |        |        |        |        |        | 0.53                                            | -0.45                            | 0.52                             | 0.68   | -0.63          | 0.36           | 0.19                             | 0.02                             | 0.04           | 0.06                              | 0.28            |

# Peak 77

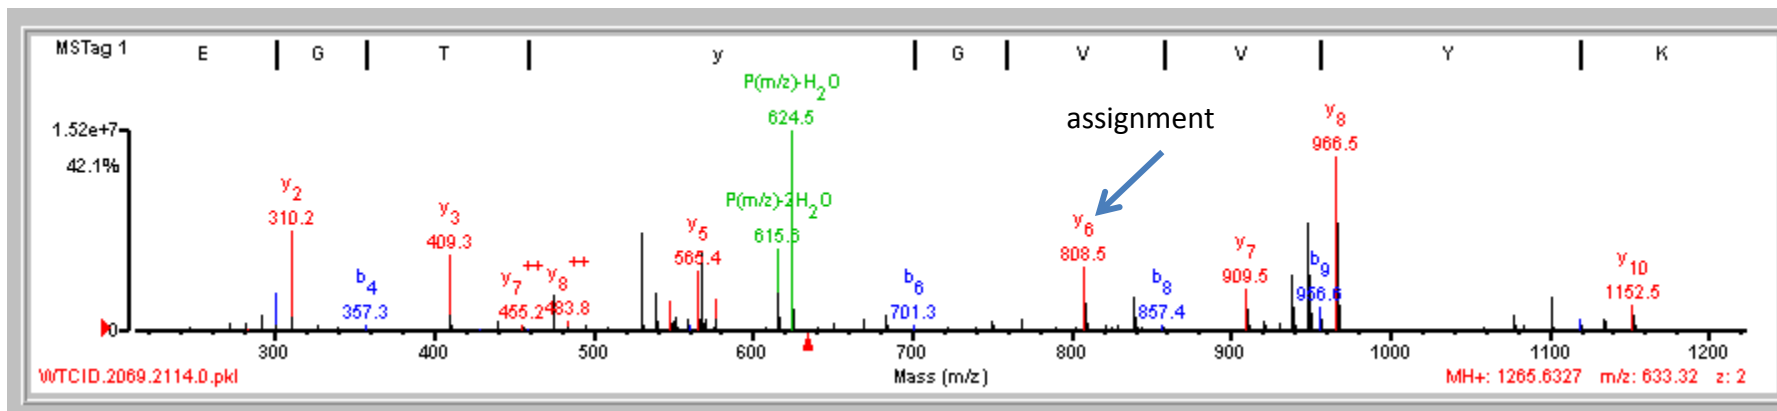

| Rank | Score | SPI (%) | BCS | # Unmatched Ions | Variable sites | Sequence                      | MH <sup>+</sup> Calculated (Da) | MH <sup>+</sup> Error (Da) | MH <sup>+</sup> Error (ppm) | Protein MW/pl (Da) | Species      | Accession #              | MS-Digest Index #     | Protein Name                            |
|------|-------|---------|-----|------------------|----------------|-------------------------------|---------------------------------|----------------------------|-----------------------------|--------------------|--------------|--------------------------|-----------------------|-----------------------------------------|
| 1    | 16.57 | 92.8    | 8   | 1/23             | Y15y           | (K) I/G/E G/T/Y/G V/V Y K (G) | 1185.62                         | 80.0177                    | 40.6                        | 34095.6/8.37       | Homo sapiens | <a href="#">4502709</a>  | <a href="#">3565</a>  | cell division cycle 2 protein isoform 1 |
| 1    | 16.57 | 92.8    | 8   | 1/23             | Y15y           | (K) I/G/E G/T/Y/G V/V Y K (G) | 1185.62                         | 80.0177                    | 40.6                        | 27502.9/6.54       | Homo sapiens | <a href="#">16306492</a> | <a href="#">13150</a> | cell division cycle 2 protein isoform 2 |
| 1    | 16.57 | 92.8    | 8   | 1/23             | Y15y           | (K) I/G/E G/T/Y/G V/V Y K (A) | 1185.62                         | 80.0177                    | 40.6                        | 35045.9/8.86       | Homo sapiens | <a href="#">4557439</a>  | <a href="#">20493</a> | cyclin-dependent kinase 3               |
| 1    | 16.57 | 92.8    | 8   | 1/23             | Y15y           | (K) I/G/E G/T/Y/G V/V Y K (A) | 1185.62                         | 80.0177                    | 40.6                        | 33929.7/8.80       | Homo sapiens | <a href="#">16936528</a> | <a href="#">30029</a> | cyclin-dependent kinase 2 isoform 1     |
| 1    | 16.57 | 92.8    | 8   | 1/23             | Y15y           | (K) I/G/E G/T/Y/G V/V Y K (A) | 1185.62                         | 80.0177                    | 40.6                        | 30084.1/9.14       | Homo sapiens | <a href="#">16936530</a> | <a href="#">30881</a> | cyclin-dependent kinase 2 isoform 2     |

| Fragment-ion (m/z)      | 300.16         | 310.24         | 409.33         | 474.90                                         | 483.81                       | 530.40 | 539.45                                         | 548.45                       | 565.44         | 567.94                                          | 576.84                        | 683.30                           | 808.48         | 839.45                           | 909.53         | 938.51                           | 948.50                           | 956.55         | 966.54         | 1077.57                          | 1101.58                           | 1134.66                           | 1152.52         |
|-------------------------|----------------|----------------|----------------|------------------------------------------------|------------------------------|--------|------------------------------------------------|------------------------------|----------------|-------------------------------------------------|-------------------------------|----------------------------------|----------------|----------------------------------|----------------|----------------------------------|----------------------------------|----------------|----------------|----------------------------------|-----------------------------------|-----------------------------------|-----------------|
| Frac. Inten. (% of TIC) | 2.38           | 6.15           | 5.28           | 2.62                                           | 1.28                         | 7.22   | 3.33                                           | 2.11                         | 3.88           | 6.20                                            | 2.63                          | 1.39                             | 5.61           | 3.04                             | 4.10           | 4.91                             | 9.79                             | 2.37           | 16.91          | 1.57                             | 2.84                              | 1.47                              | 2.91            |
| Rel. Inten. (% of BP)   | 14.10          | 36.35          | 31.22          | 15.49                                          | 7.58                         | 42.70  | 19.71                                          | 12.45                        | 22.95          | 36.63                                           | 15.53                         | 8.25                             | 33.16          | 17.97                            | 24.21          | 29.02                            | 57.88                            | 13.99          | 100.00         | 9.31                             | 16.82                             | 8.71                              | 17.19           |
| Score                   | 1.00           | 1.00           | 1.00           | 0.50                                           | 1.00                         | -0.43  | 0.50                                           | 1.00                         | 1.00           | 0.50                                            | 1.00                          | 0.50                             | 1.00           | 0.50                             | 1.00           | 0.50                             | 0.50                             | 1.00           | 1.00           | 0.50                             | 0.50                              | 0.50                              | 1.00            |
| Ion-type                | b <sub>3</sub> | y <sub>2</sub> | y <sub>3</sub> | y <sup>++</sup> <sub>8</sub> -H <sub>2</sub> O | y <sup>++</sup> <sub>8</sub> |        | y <sup>++</sup> <sub>9</sub> -H <sub>2</sub> O | y <sup>++</sup> <sub>9</sub> | y <sub>5</sub> | y <sup>++</sup> <sub>10</sub> -H <sub>2</sub> O | y <sup>++</sup> <sub>10</sub> | b <sub>6</sub> -H <sub>2</sub> O | y <sub>6</sub> | b <sub>8</sub> -H <sub>2</sub> O | y <sub>7</sub> | b <sub>9</sub> -H <sub>2</sub> O | y <sub>8</sub> -H <sub>2</sub> O | b <sub>9</sub> | y <sub>8</sub> | y <sub>8</sub> -H <sub>2</sub> O | b <sub>10</sub> -H <sub>2</sub> O | y <sub>10</sub> -H <sub>2</sub> O | y <sub>10</sub> |
| Delta Da                | 0.00           | 0.06           | 0.09           | 0.19                                           | 0.09                         |        | 0.21                                           | 0.21                         | 0.11           | 0.19                                            | 0.09                          | 0.06                             | 0.12           | 0.12                             | 0.12           | 0.11                             | 0.08                             | 0.14           | 0.11           | 0.10                             | 0.11                              | 0.17                              | 0.02            |

# Peak 78

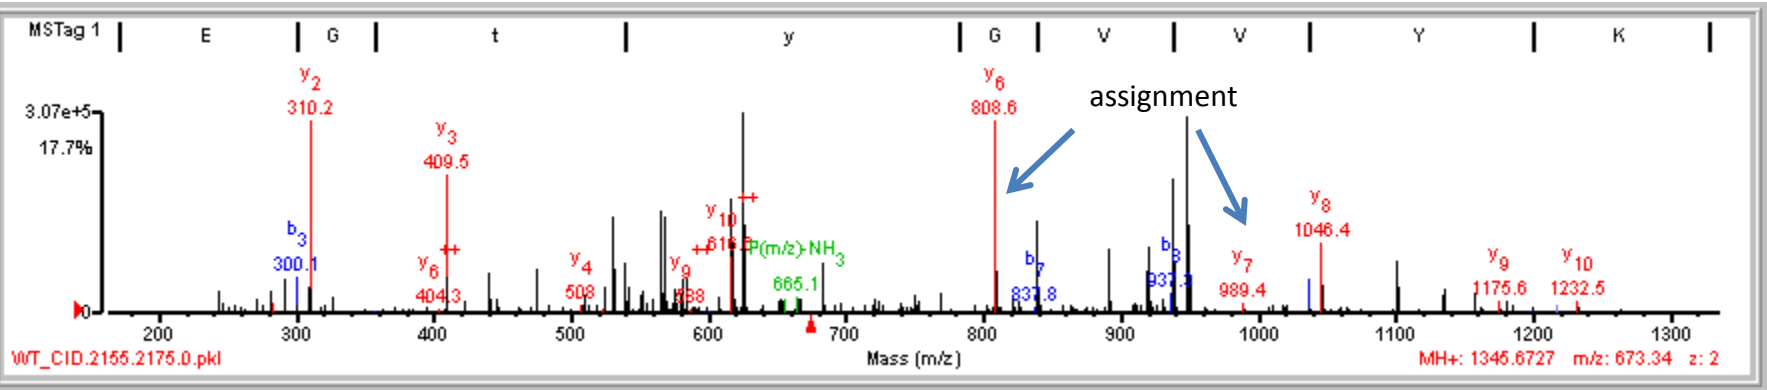

| Rank                   | Score | SPI (%) | BCS | # Unmatched Ions | Variable sites | Sequence                      | MH <sup>+</sup> Calculated (Da) | MH <sup>+</sup> Error (Da) | MH <sup>+</sup> Error (ppm) | Protein MW/pl (Da)                             | Species      | Accession #              | MS-Digest Index #     | Protein Name                            |        |                               |        |                                                |                |                                                |                                                |                                  |        |                                                |                                                |                |                                                |                |                |                                                 |                                                 |       |
|------------------------|-------|---------|-----|------------------|----------------|-------------------------------|---------------------------------|----------------------------|-----------------------------|------------------------------------------------|--------------|--------------------------|-----------------------|-----------------------------------------|--------|-------------------------------|--------|------------------------------------------------|----------------|------------------------------------------------|------------------------------------------------|----------------------------------|--------|------------------------------------------------|------------------------------------------------|----------------|------------------------------------------------|----------------|----------------|-------------------------------------------------|-------------------------------------------------|-------|
| 1                      | 11.24 | 80.4    | 6   | 5/24             | T14t Y15y      | (K) I/G E G t/y/G v/v Y K (G) | 1185.62                         | 160.0577                   | 92.9                        | 34095.6/8.37                                   | Homo sapiens | <a href="#">4502709</a>  | <a href="#">3565</a>  | cell division cycle 2 protein isoform 1 |        |                               |        |                                                |                |                                                |                                                |                                  |        |                                                |                                                |                |                                                |                |                |                                                 |                                                 |       |
| 1                      | 11.24 | 80.4    | 6   | 5/24             | T14t Y15y      | (K) I/G E G t/y/G v/v Y K (G) | 1185.62                         | 160.0577                   | 92.9                        | 27502.9/6.54                                   | Homo sapiens | <a href="#">16306492</a> | <a href="#">13150</a> | cell division cycle 2 protein isoform 2 |        |                               |        |                                                |                |                                                |                                                |                                  |        |                                                |                                                |                |                                                |                |                |                                                 |                                                 |       |
| 1                      | 11.24 | 80.4    | 6   | 5/24             | T14t Y15y      | (K) I/G E G t/y/G v/v Y K (A) | 1185.62                         | 160.0577                   | 92.9                        | 35045.9/8.86                                   | Homo sapiens | <a href="#">4557439</a>  | <a href="#">20493</a> | cyclin-dependent kinase 3               |        |                               |        |                                                |                |                                                |                                                |                                  |        |                                                |                                                |                |                                                |                |                |                                                 |                                                 |       |
| 1                      | 11.24 | 80.4    | 6   | 5/24             | T14t Y15y      | (K) I/G E G t/y/G v/v Y K (A) | 1185.62                         | 160.0577                   | 92.9                        | 33929.7/8.80                                   | Homo sapiens | <a href="#">16936528</a> | <a href="#">30029</a> | cyclin-dependent kinase 2 isoform 1     |        |                               |        |                                                |                |                                                |                                                |                                  |        |                                                |                                                |                |                                                |                |                |                                                 |                                                 |       |
| 1                      | 11.24 | 80.4    | 6   | 5/24             | T14t Y15y      | (K) I/G E G t/y/G v/v Y K (A) | 1185.62                         | 160.0577                   | 92.9                        | 30084.1/9.14                                   | Homo sapiens | <a href="#">16936530</a> | <a href="#">30881</a> | cyclin-dependent kinase 2 isoform 2     |        |                               |        |                                                |                |                                                |                                                |                                  |        |                                                |                                                |                |                                                |                |                |                                                 |                                                 |       |
| Fragment-ion (m/z)     |       |         |     |                  |                |                               | 300.14                          | 310.22                     | 409.47                      | 440.52                                         | 475.02       | 530.63                   | 539.66                | 565.88                                  | 568.46 | 575.99                        | 616.10 | 624.97                                         | 683.78         | 808.65                                         | 839.52                                         | 891.57                           | 919.39 | 920.46                                         | 938.48                                         | 948.52         | 1036.40                                        | 1046.44        | 1101.61        | 1134.47                                         |                                                 |       |
| Frac. Inten.(% of TIC) |       |         |     |                  |                |                               | 1.56                            | 7.65                       | 6.12                        | 2.22                                           | 2.91         | 4.99                     | 2.70                  | 4.30                                    | 5.83   | 0.04                          | 8.61   | 1.60                                           | 8.99           | 4.14                                           | 3.22                                           | 1.47                             | 3.17   | 7.20                                           | 11.12                                          | 1.60           | 3.67                                           | 3.19           | 1.60           | 3.19                                            | 1.60                                            |       |
| Rel. Inten.(% of BP)   |       |         |     |                  |                |                               | 14.07                           | 68.82                      | 55.05                       | 19.94                                          | 26.16        | 44.88                    | 24.24                 | 38.64                                   | 52.40  | 0.39                          | 77.41  | 14.38                                          | 18.73          | 80.85                                          | 37.21                                          | 28.96                            | 13.25  | 28.51                                          | 64.78                                          | 100.00         | 14.37                                          | 33.04          | 28.70          | 14.37                                           | 28.70                                           | 14.37 |
| Score                  |       |         |     |                  |                |                               | 1.00                            | 1.00                       | 1.00                        | 0.25                                           | -0.26        | -0.45                    | -0.24                 | 1.00                                    | -0.52  | 1.00                          | 1.00   | 1.50                                           | 1.00           | 1.00                                           | 0.25                                           | 1.00                             | 0.25   | 0.50                                           | 0.25                                           | -0.29          | 0.25                                           | 1.00           | 1.00           | 0.25                                            | 0.25                                            | 0.25  |
| Ion-type               |       |         |     |                  |                |                               | b <sub>3</sub>                  | y <sub>2</sub>             | y <sub>3</sub>              | b <sub>5</sub> -H <sub>3</sub> PO <sub>4</sub> |              |                          |                       | y <sub>5</sub>                          | st     | y <sup>++</sup> <sub>10</sub> | sty    | b <sub>6</sub> -H <sub>3</sub> PO <sub>4</sub> | y <sub>6</sub> | b <sub>8</sub> -H <sub>3</sub> PO <sub>4</sub> | y <sub>7</sub> -H <sub>3</sub> PO <sub>4</sub> | b <sub>8</sub> -H <sub>2</sub> O |        | b <sub>9</sub> -H <sub>3</sub> PO <sub>4</sub> | y <sub>8</sub> -H <sub>3</sub> PO <sub>4</sub> | b <sub>9</sub> | y <sub>9</sub> -H <sub>3</sub> PO <sub>4</sub> | b <sub>9</sub> | y <sub>9</sub> | b <sub>10</sub> -H <sub>3</sub> PO <sub>4</sub> | y <sub>10</sub> -H <sub>3</sub> PO <sub>4</sub> |       |
| Delta Da               |       |         |     |                  |                |                               | -0.02                           | 0.04                       | 0.23                        | 0.31                                           |              |                          |                       | 0.55                                    |        | 0.69                          | -0.64  | 0.68                                           | 0.54           | 0.29                                           | 0.19                                           | 0.17                             | 0.09   |                                                | 0.08                                           | 0.10           | 0.02                                           | 0.04           | 0.14           | -0.02                                           |                                                 |       |



# Peak 80

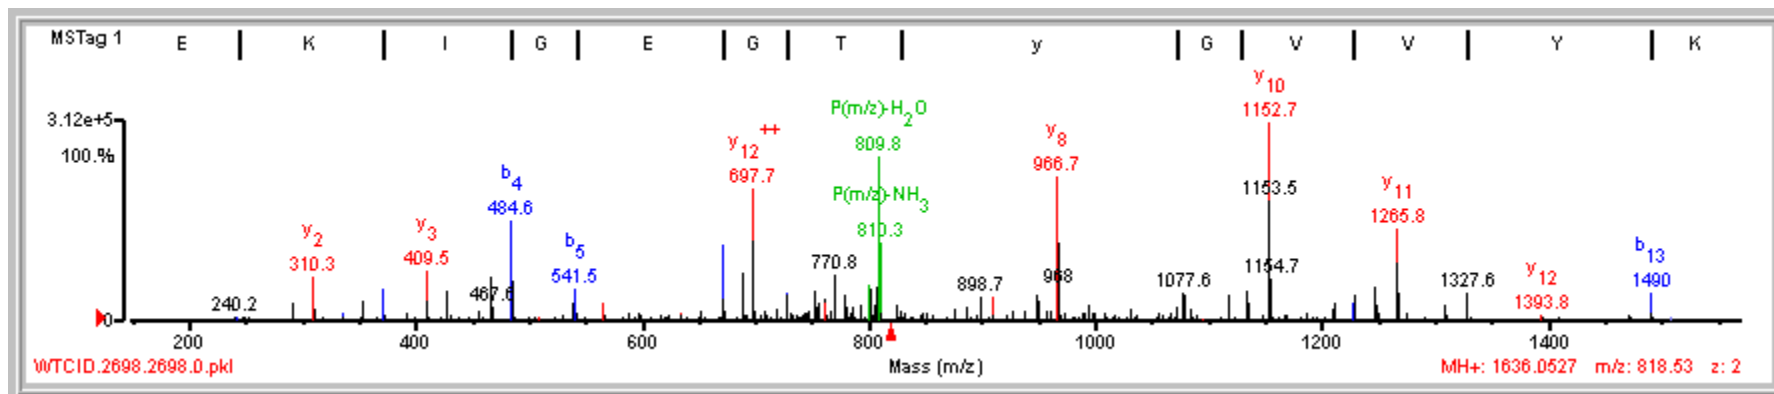

| Rank | Score | SPI (%) | BCS | # Unmatched Ions | Variable sites | Sequence                                                  | MH <sup>+</sup> Calculated (Da) | MH <sup>+</sup> Error (Da) | MH <sup>+</sup> Error (ppm) | Protein MW/pi (Da) | Species      | Accession #              | MS-Digest Index #     | Protein Name                            |
|------|-------|---------|-----|------------------|----------------|-----------------------------------------------------------|---------------------------------|----------------------------|-----------------------------|--------------------|--------------|--------------------------|-----------------------|-----------------------------------------|
| 1    | 19.24 | 95.6    | 10  | 2/25             | Y15y           | (K) I/E/K   I   G   E   G   T   y   G   V   V   Y   K (G) | 1555.84                         | 80.2161                    | 152.7                       | 34095.6/8.37       | Homo sapiens | <a href="#">4502709</a>  | <a href="#">3565</a>  | cell division cycle 2 protein isoform 1 |
| 1    | 19.24 | 95.6    | 10  | 2/25             | Y15y           | (K) I/E/K   I   G   E   G   T   y   G   V   V   Y   K (G) | 1555.84                         | 80.2161                    | 152.7                       | 27502.9/6.54       | Homo sapiens | <a href="#">16306492</a> | <a href="#">13150</a> | cell division cycle 2 protein isoform 2 |

  

| Fragment-ion (m/z)      | 310.32         | 371.43         | 409.47         | 466.52                          | 484.58         | 541.52         | 670.59         | 688.57                                          | 697.71                        | 727.22         | 753.23                                          | 761.25                        | 769.99 | 778.66 | 948.57                           | 966.66         | 1077.60                          | 1134.75                          | 1152.66         | 1227.89         | 1247.70                           | 1265.85         | 1308.76                           | 1327.59 | 1490.02         |
|-------------------------|----------------|----------------|----------------|---------------------------------|----------------|----------------|----------------|-------------------------------------------------|-------------------------------|----------------|-------------------------------------------------|-------------------------------|--------|--------|----------------------------------|----------------|----------------------------------|----------------------------------|-----------------|-----------------|-----------------------------------|-----------------|-----------------------------------|---------|-----------------|
| Frac. Inten. (% of TIC) | 2.52           | 1.62           | 3.40           | 2.51                            | 6.38           | 1.79           | 4.29           | 2.97                                            | 9.78                          | 2.99           | 2.10                                            | 2.16                          | 0.11   | 2.61   | 2.41                             | 11.69          | 3.00                             | 2.61                             | 16.54           | 2.34            | 2.56                              | 8.22            | 1.75                              | 1.77    | 1.88            |
| Rel. Inten. (% of BP)   | 15.25          | 9.79           | 20.54          | 15.15                           | 38.58          | 10.84          | 25.95          | 17.95                                           | 59.11                         | 18.07          | 12.71                                           | 13.07                         | 0.67   | 15.76  | 14.57                            | 70.65          | 18.12                            | 15.77                            | 100.00          | 14.14           | 15.49                             | 49.71           | 10.56                             | 10.69   | 11.34           |
| Score                   | 1.00           | 1.00           | 1.00           | 0.50                            | 1.00           | 1.00           | 1.00           | 0.50                                            | 1.00                          | 1.00           | 0.50                                            | 1.00                          | 1.50   | -0.16  | 0.50                             | 1.00           | 0.50                             | 0.50                             | 1.00            | 1.00            | 0.50                              | 1.00            | 0.50                              | -0.11   | 1.00            |
| Ion-type                | y <sub>2</sub> | b <sub>3</sub> | y <sub>3</sub> | b <sub>4</sub> -NH <sub>3</sub> | b <sub>4</sub> | b <sub>5</sub> | b <sub>5</sub> | y <sup>++</sup> <sub>12</sub> -H <sub>2</sub> O | y <sup>++</sup> <sub>12</sub> | b <sub>7</sub> | y <sup>++</sup> <sub>13</sub> -H <sub>2</sub> O | y <sup>++</sup> <sub>13</sub> | sty    |        | y <sub>8</sub> -H <sub>2</sub> O | y <sub>8</sub> | y <sub>9</sub> -H <sub>2</sub> O | y <sub>10</sub> -NH <sub>3</sub> | y <sub>10</sub> | b <sub>11</sub> | y <sub>11</sub> -H <sub>2</sub> O | y <sub>11</sub> | b <sub>12</sub> -H <sub>2</sub> O |         | b <sub>13</sub> |
| Delta Da                | 0.14           | 0.20           | 0.23           | -0.77                           | 0.27           | 0.19           | 0.21           | 0.23                                            | 0.37                          | -0.18          | 0.37                                            | -0.61                         | 0.57   |        | 0.15                             | 0.23           | 0.13                             | -0.72                            | 0.16            | 0.32            | 0.13                              | 0.27            | 0.14                              |         | 0.32            |

# Peak 81

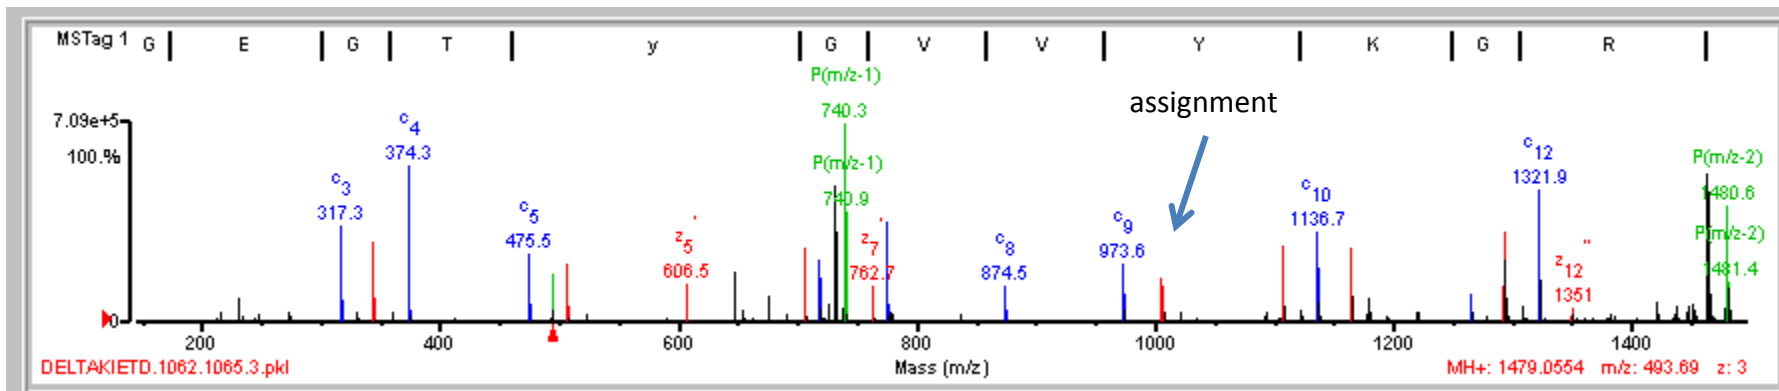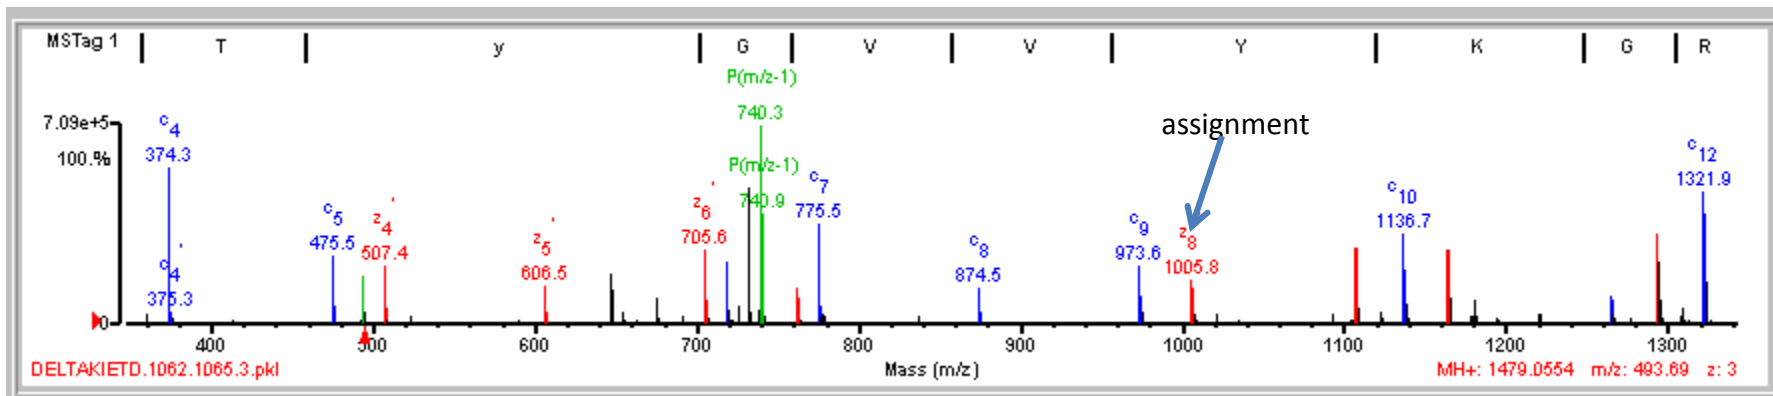

| Rank | Score | SPI (%) | BCS | # Unmatched Ions | Variable sites | Sequence                          | MH* Calculated (Da) | MH* Error (Da) | MH* Error (ppm) | Protein MW/pl (Da) | Species      | Accession #              | MS-Digest Index #     | Protein Name                            |
|------|-------|---------|-----|------------------|----------------|-----------------------------------|---------------------|----------------|-----------------|--------------------|--------------|--------------------------|-----------------------|-----------------------------------------|
| 1    | 20.83 | 97.9    | 12  | 1/25             | Y15y           | (K) I/G/E G T Y G V V Y K G R (H) | 1398.74             | 80.3179        | 237.7           | 34095.6/8.37       | Homo sapiens | <a href="#">4502709</a>  | <a href="#">3565</a>  | cell division cycle 2 protein isoform 1 |
| 1    | 20.83 | 97.9    | 12  | 1/25             | Y15y           | (K) I/G/E G T Y G V V Y K G R (H) | 1398.74             | 80.3179        | 237.7           | 27502.9/6.54       | Homo sapiens | <a href="#">16306492</a> | <a href="#">13150</a> | cell division cycle 2 protein isoform 2 |

| Fragment-ion (m/z)     | 231.75         | 317.29         | 344.30         | 374.33         | 475.46         | 507.43         | 606.52         | 647.14                        | 654.98                        | 675.53                        | 705.64         | 762.68         | 775.47         | 874.51         | 973.65         | 1005.75        | 1106.76        | 1136.71         | 1163.78         | 1180.42         | 1264.84         | 1292.90                       | 1293.79         | 1321.90                       | 1351.04 |
|------------------------|----------------|----------------|----------------|----------------|----------------|----------------|----------------|-------------------------------|-------------------------------|-------------------------------|----------------|----------------|----------------|----------------|----------------|----------------|----------------|-----------------|-----------------|-----------------|-----------------|-------------------------------|-----------------|-------------------------------|---------|
| Frac. Inten.(% of TIC) | 1.14           | 4.56           | 4.16           | 6.81           | 3.41           | 3.09           | 1.96           | 3.34                          | 1.06                          | 1.57                          | 4.04           | 2.78           | 4.79           | 2.02           | 3.90           | 3.73           | 6.99           | 6.82            | 7.18            | 2.08            | 2.83            | 1.39                          | 7.10            | 12.03                         | 1.21    |
| Rel. Inten.(% of BP)   | 9.51           | 37.87          | 34.60          | 56.60          | 28.35          | 25.66          | 16.31          | 27.78                         | 8.84                          | 13.03                         | 33.58          | 23.09          | 39.83          | 16.74          | 32.37          | 30.99          | 58.10          | 56.65           | 59.64           | 17.27           | 23.53           | 11.57                         | 58.96           | 100.00                        | 10.05   |
| Score                  | 0.25           | 1.00           | 1.00           | 1.00           | 1.00           | 1.00           | 1.00           | 1.00                          | 0.25                          | 1.00                          | 1.00           | 1.00           | 1.00           | 1.00           | 1.00           | 1.00           | 1.00           | 1.00            | 1.00            | -0.17           | 1.00            | 1.00                          | 0.25            | 1.00                          | 0.25    |
| Ion-type               | y <sub>2</sub> | c <sub>3</sub> | z <sub>3</sub> | c <sub>4</sub> | c <sub>5</sub> | z <sub>4</sub> | z <sub>5</sub> | z <sup>++</sup> <sub>11</sub> | y <sup>++</sup> <sub>11</sub> | z <sup>++</sup> <sub>12</sub> | z <sub>6</sub> | z <sub>7</sub> | c <sub>7</sub> | c <sub>8</sub> | c <sub>9</sub> | z <sub>8</sub> | z <sub>9</sub> | c <sub>10</sub> | z <sub>10</sub> | c <sub>11</sub> | z <sub>11</sub> | z <sup>++</sup> <sub>11</sub> | c <sub>12</sub> | z <sup>++</sup> <sub>12</sub> |         |
| Delta Da               | -0.39          | 0.11           | 0.08           | 0.13           | 0.21           | 0.15           | 0.17           | 0.35                          | 0.18                          | 0.23                          | 0.22           | 0.24           | 0.17           | 0.14           | 0.21           | 0.28           | 0.24           | 0.21            | 0.24            | 0.24            | 0.24            | 0.32                          | 0.20            | 0.28                          | 0.43    |



# Peak 82

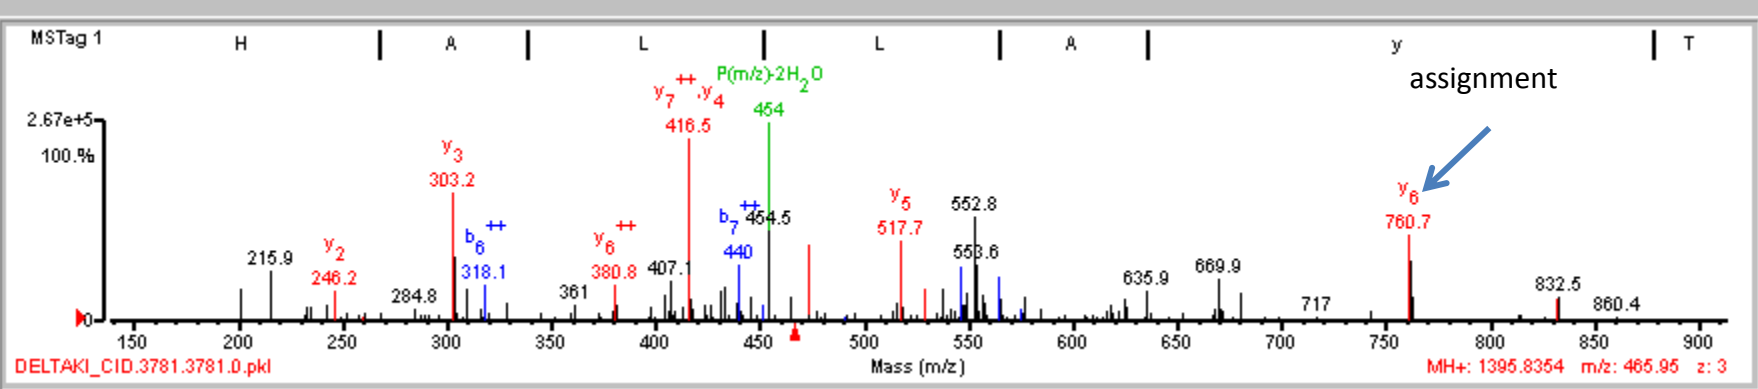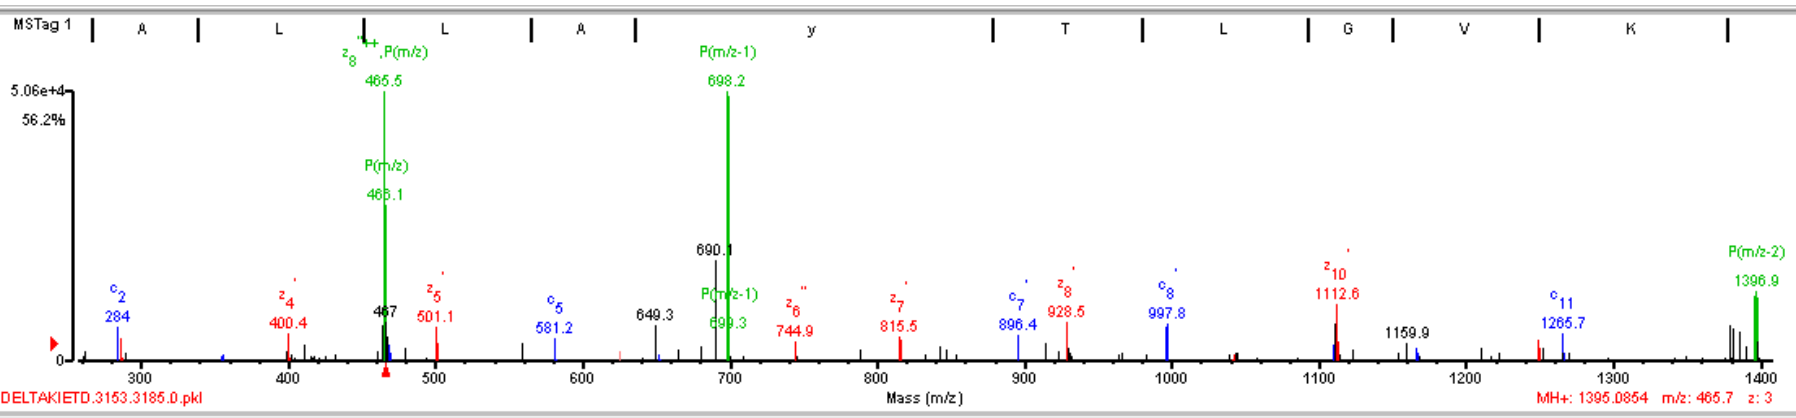

| Seq ID | Start | End  | Mod | Charge | Protein | Accession 1                     | Accession 2 | Accession 3 | Accession 4 | Accession 5  | Accession 6  | Accession 7             | Accession 8           | Accession 9 | Accession 10 | Accession 11 | Accession 12 | Accession 13 | Accession 14 | Accession 15 | Accession 16 | Accession 17 | Accession 18 | Accession 19 | Accession 20 | Accession 21 | Accession 22 | Accession 23 | Accession 24 | Accession 25 | Accession 26 | Accession 27 | Accession 28 | Accession 29 | Accession 30 | Accession 31 | Accession 32 | Accession 33 | Accession 34 | Accession 35                                       | Accession 36 | Accession 37 | Accession 38 | Accession 39 | Accession 40 | Accession 41 | Accession 42 | Accession 43 | Accession 44 | Accession 45 | Accession 46 | Accession 47 | Accession 48 | Accession 49 | Accession 50 | Accession 51 | Accession 52 | Accession 53 | Accession 54 | Accession 55 | Accession 56 | Accession 57 | Accession 58 | Accession 59 | Accession 60 | Accession 61 | Accession 62 | Accession 63 | Accession 64 | Accession 65 | Accession 66 | Accession 67 | Accession 68 | Accession 69 | Accession 70 | Accession 71 | Accession 72 | Accession 73 | Accession 74 | Accession 75 | Accession 76 | Accession 77 | Accession 78 | Accession 79 | Accession 80 | Accession 81 | Accession 82 | Accession 83 | Accession 84 | Accession 85 | Accession 86 | Accession 87 | Accession 88 | Accession 89 | Accession 90 | Accession 91 | Accession 92 | Accession 93 | Accession 94 | Accession 95 | Accession 96 | Accession 97 | Accession 98 | Accession 99 | Accession 100 |
|--------|-------|------|-----|--------|---------|---------------------------------|-------------|-------------|-------------|--------------|--------------|-------------------------|-----------------------|-------------|--------------|--------------|--------------|--------------|--------------|--------------|--------------|--------------|--------------|--------------|--------------|--------------|--------------|--------------|--------------|--------------|--------------|--------------|--------------|--------------|--------------|--------------|--------------|--------------|--------------|----------------------------------------------------|--------------|--------------|--------------|--------------|--------------|--------------|--------------|--------------|--------------|--------------|--------------|--------------|--------------|--------------|--------------|--------------|--------------|--------------|--------------|--------------|--------------|--------------|--------------|--------------|--------------|--------------|--------------|--------------|--------------|--------------|--------------|--------------|--------------|--------------|--------------|--------------|--------------|--------------|--------------|--------------|--------------|--------------|--------------|--------------|--------------|--------------|--------------|--------------|--------------|--------------|--------------|--------------|--------------|--------------|--------------|--------------|--------------|--------------|--------------|--------------|--------------|--------------|--------------|--------------|---------------|
| 1      | 15.31 | 75.0 | 8   | 7/25   | Y141y   | (R) E H/A/L/L/A Y T/L/G V\K (Q) | 1314.74     | 81.0938     | 807.8       | 50141.1/9.10 | Homo sapiens | <a href="#">4503471</a> | <a href="#">4998</a>  |             |              |              |              |              |              |              |              |              |              |              |              |              |              |              |              |              |              |              |              |              |              |              |              |              |              | eukaryotic translation elongation factor 1 alpha 1 |              |              |              |              |              |              |              |              |              |              |              |              |              |              |              |              |              |              |              |              |              |              |              |              |              |              |              |              |              |              |              |              |              |              |              |              |              |              |              |              |              |              |              |              |              |              |              |              |              |              |              |              |              |              |              |              |              |              |              |              |              |              |              |              |               |
| 1      | 15.31 | 75.0 | 8   | 7/25   | Y141y   | (R) E H/A/L/L/A Y T/L/G V\K (Q) | 1314.74     | 81.0938     | 807.8       | 50470.4/9.11 | Homo sapiens | <a href="#">4503475</a> | <a href="#">10607</a> |             |              |              |              |              |              |              |              |              |              |              |              |              |              |              |              |              |              |              |              |              |              |              |              |              |              | eukaryotic translation elongation factor 1 alpha 2 |              |              |              |              |              |              |              |              |              |              |              |              |              |              |              |              |              |              |              |              |              |              |              |              |              |              |              |              |              |              |              |              |              |              |              |              |              |              |              |              |              |              |              |              |              |              |              |              |              |              |              |              |              |              |              |              |              |              |              |              |              |              |              |              |               |

| Fragment-ion (m/z)      | 201.04 | 215.90 | 303.25         | 309.19                           | 318.12            | 380.78            | 404.31            | 407.14                           | 416.47         | 433.38                           | 439.99            | 473.12            | 517.71         | 529.14            | 538.22                           | 546.75            | 548.45 | 552.79 | 556.94 | 564.73         | 625.41            | 635.94         | 669.90 | 760.71         | 831.60 |
|-------------------------|--------|--------|----------------|----------------------------------|-------------------|-------------------|-------------------|----------------------------------|----------------|----------------------------------|-------------------|-------------------|----------------|-------------------|----------------------------------|-------------------|--------|--------|--------|----------------|-------------------|----------------|--------|----------------|--------|
| Frac. Inten. (% of TIC) | 1.69   | 2.62   | 10.55          | 3.23                             | 2.02              | 2.77              | 2.50              | 4.43                             | 11.41          | 0.06                             | 3.91              | 4.34              | 5.01           | 1.69              | 2.10                             | 3.75              | 2.43   | 9.09   | 3.10   | 3.89           | 1.95              | 1.80           | 3.58   | 9.35           | 2.74   |
| Rel. Inten. (% of BP)   | 14.80  | 22.97  | 92.43          | 28.27                            | 17.71             | 24.25             | 21.88             | 38.81                            | 100.00         | 0.51                             | 34.28             | 38.05             | 43.92          | 14.79             | 18.43                            | 32.86             | 21.29  | 79.63  | 27.13  | 34.06          | 17.10             | 15.73          | 31.41  | 81.91          | 24.05  |
| Score                   | -0.15  | -0.23  | 1.00           | 0.50                             | 1.00              | 1.00              | -0.22             | 0.50                             | 1.00           | 1.50                             | 1.00              | 1.00              | 1.00           | 1.00              | 0.50                             | 1.00              | -0.21  | -0.80  | -0.27  | 1.00           | 1.00              | 1.00           | -0.31  | 1.00           |        |
| Ion-type                |        |        | y <sub>3</sub> | b <sub>3</sub> +H <sub>2</sub> O | b <sub>3</sub> +e | y <sub>3</sub> +e | y <sub>3</sub> +e | y <sub>3</sub> +H <sub>2</sub> O | y <sub>3</sub> | b <sub>3</sub> -H <sub>2</sub> O | b <sub>3</sub> +e | y <sub>3</sub> +e | y <sub>3</sub> | y <sub>3</sub> +e | b <sub>3</sub> +H <sub>2</sub> O | b <sub>3</sub> +e |        |        |        | b <sub>3</sub> | b <sub>3</sub> +e | b <sub>3</sub> |        | y <sub>3</sub> |        |
| Delta Da                |        |        | 0.05           | 0.02                             | -0.06             | 0.09              |                   | -0.06                            | 0.18           | 0.16                             | 0.30              | 0.37              | 0.38           | -0.15             | 0.47                             | -0.01             |        |        |        | 0.42           | 0.61              | 0.59           |        | 0.35           |        |
|                         |        |        |                |                                  |                   |                   |                   |                                  | 0.27           | 0.46                             |                   |                   |                |                   | 0.45                             |                   |        |        |        | -0.08          |                   |                |        | 0.20           |        |

# Peak 83

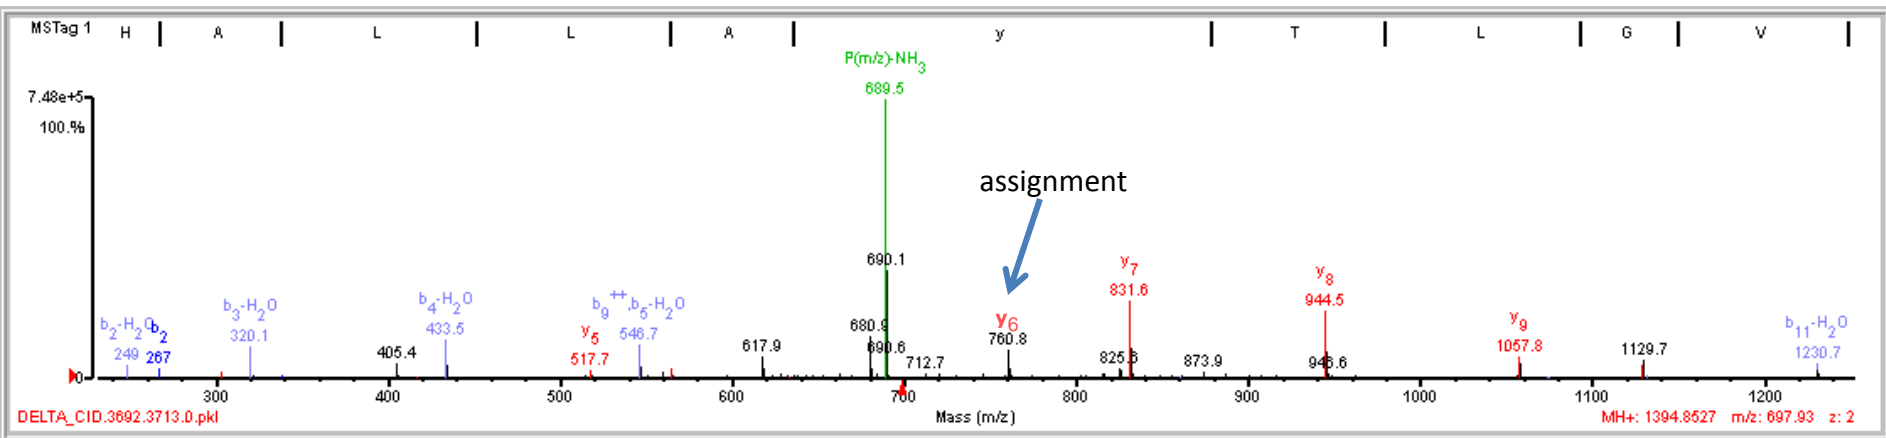

|   |       |      |   |      |       |                                               |         |         |       |              |              |                         |                       |                                                    |
|---|-------|------|---|------|-------|-----------------------------------------------|---------|---------|-------|--------------|--------------|-------------------------|-----------------------|----------------------------------------------------|
| 1 | 12.74 | 88.2 | 7 | 6/22 | Y141y | (R) E H   A / L / L   A   Y / T L   G V K (Q) | 1314.74 | 80.1111 | 103.8 | 50141.1/9.10 | Homo sapiens | <a href="#">4503471</a> | <a href="#">4998</a>  | eukaryotic translation elongation factor 1 alpha 1 |
| 1 | 12.74 | 88.2 | 7 | 6/22 | Y141y | (R) E H   A / L / L   A   Y / T L   G V K (Q) | 1314.74 | 80.1111 | 103.8 | 50470.4/9.11 | Homo sapiens | <a href="#">4503475</a> | <a href="#">10607</a> | eukaryotic translation elongation factor 1 alpha 2 |

| Fragment-ion (m/z)      | 249.00                           | 267.03         | 303.12         | 320.14                           | 405.42                           | 433.47         | 517.70                       | 546.74         | 559.69                           | 564.88         | 617.94                           | 632.17         | 635.99         | 646.68         | 760.83         | 815.68         | 825.64         | 831.64         | 944.52         | 1057.80        | 1128.68        | 1230.67         |
|-------------------------|----------------------------------|----------------|----------------|----------------------------------|----------------------------------|----------------|------------------------------|----------------|----------------------------------|----------------|----------------------------------|----------------|----------------|----------------|----------------|----------------|----------------|----------------|----------------|----------------|----------------|-----------------|
| Frac. Inten. (% of TIC) | 2.51                             | 1.44           | 1.24           | 5.43                             | 2.83                             | 7.66           | 2.23                         | 6.63           | 1.84                             | 2.38           | 4.71                             | 1.58           | 1.21           | 1.35           | 6.35           | 1.52           | 2.67           | 15.61          | 15.32          | 5.54           | 4.68           | 5.25            |
| Rel. Inten. (% of BP)   | 16.11                            | 9.24           | 7.94           | 34.78                            | 18.15                            | 49.07          | 14.29                        | 42.49          | 11.80                            | 15.27          | 30.16                            | 10.15          | 7.78           | 8.64           | 40.66          | 9.76           | 17.11          | 100.00         | 98.14          | 35.49          | 29.97          | 33.60           |
| Score                   | 0.50                             | 1.00           | 1.00           | 0.50                             | -0.18                            | 0.50           | 1.00                         | 1.00           | -0.12                            | 1.00           | 0.50                             | -0.10          | 1.00           | -0.09          | 1.00           | -0.10          | -0.17          | 1.00           | 1.00           | 1.00           | 1.00           | 0.50            |
| Ion-type                | b <sub>2</sub> -H <sub>2</sub> O | b <sub>2</sub> | y <sub>3</sub> | b <sub>3</sub> -H <sub>2</sub> O | b <sub>4</sub> -H <sub>2</sub> O | y <sub>5</sub> | b <sup>++</sup> <sub>9</sub> | b <sub>5</sub> | b <sub>5</sub> -H <sub>2</sub> O | b <sub>5</sub> | b <sub>6</sub> -H <sub>2</sub> O | b <sub>6</sub> | b <sub>6</sub> | b <sub>6</sub> | y <sub>6</sub> | y <sub>6</sub> | y <sub>6</sub> | y <sub>7</sub> | y <sub>8</sub> | y <sub>8</sub> | y <sub>9</sub> | y <sub>10</sub> |
| Delta Da                | -0.10                            | -0.08          | -0.08          | 0.00                             | 0.25                             | 0.37           | -0.02                        | -0.57          | 0.57                             | 0.07           | 0.60                             | 0.64           | 0.64           | 0.47           | 0.24           | 0.03           | 0.23           | 0.07           | 0.07           | 0.07           | 0.07           | 0.08            |

# Peak 85

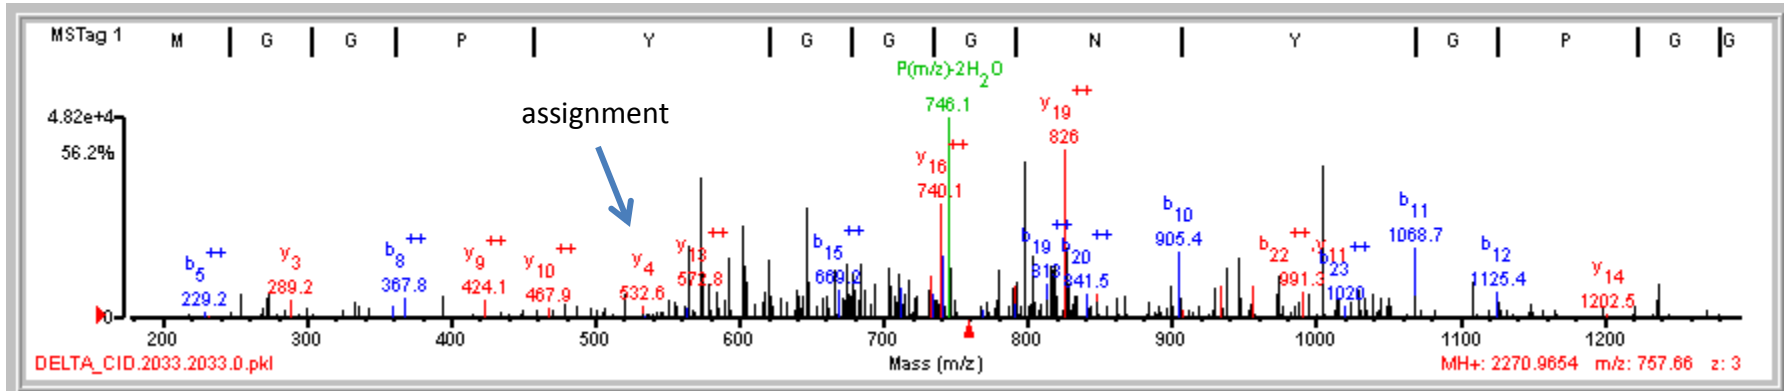

| Rank | Score | SPI (%) | BCS | # Unmatched Ions | Variable sites | Sequence                                                                          | MH <sup>+</sup> Calculated (Da) | MH <sup>+</sup> Error (Da) | MH <sup>+</sup> Error (ppm) | Protein MW/pi (Da) | Species      | Accession #              | MS-Digest Index #     | Protein Name                                             |
|------|-------|---------|-----|------------------|----------------|-----------------------------------------------------------------------------------|---------------------------------|----------------------------|-----------------------------|--------------------|--------------|--------------------------|-----------------------|----------------------------------------------------------|
| 1    | 13.75 | 77.3    | 10  | 7/25             | Y335y          | (R) N M G G P Y   G / G \ G / N   Y   G   P G \ G S \ G \ G / S / G G Y G G R (S) | 2189.91                         | 81.0601                    | 481.6                       | 36006.1/8.67       | Homo sapiens | <a href="#">4504447</a>  | <a href="#">15070</a> | heterogeneous nuclear ribonucleoprotein A2/B1 isoform A2 |
| 1    | 13.75 | 77.3    | 10  | 7/25             | Y347y          | (R) N M G G P Y   G / G \ G / N   Y   G   P G \ G S \ G \ G / S / G G Y G G R (S) | 2189.91                         | 81.0601                    | 481.6                       | 37429.9/8.97       | Homo sapiens | <a href="#">14043072</a> | <a href="#">17847</a> | heterogeneous nuclear ribonucleoprotein A2/B1 isoform B1 |

| Fragment-ion (m/z)      | 565.17 | 573.83                        | 593.12                                          | 602.49                          | 620.93         | 639.71                        | 646.71         | 674.79                                          | 683.80                        | 712.65                        | 733.53         | 740.11                        | 789.38 | 797.79                        | 804.26 | 816.03                                          | 819.13 | 826.05                        | 905.37          | 937.83 | 946.81 | 973.40                            | 1004.25 | 1068.71         | 1125.45         |
|-------------------------|--------|-------------------------------|-------------------------------------------------|---------------------------------|----------------|-------------------------------|----------------|-------------------------------------------------|-------------------------------|-------------------------------|----------------|-------------------------------|--------|-------------------------------|--------|-------------------------------------------------|--------|-------------------------------|-----------------|--------|--------|-----------------------------------|---------|-----------------|-----------------|
| Frac. Inten. (% of TIC) | 2.52   | 6.55                          | 2.36                                            | 8.10                            | 2.95           | 2.15                          | 5.84           | 2.74                                            | 2.60                          | 2.62                          | 3.64           | 6.09                          | 2.74   | 6.56                          | 2.78   | 3.75                                            | 2.56   | 10.10                         | 3.38            | 2.18   | 2.87   | 2.50                              | 7.04    | 3.26            | 2.14            |
| Rel. Inten. (% of BP)   | 24.95  | 64.93                         | 23.40                                           | 80.22                           | 29.23          | 21.28                         | 57.82          | 27.13                                           | 25.77                         | 25.95                         | 36.02          | 60.32                         | 27.09  | 64.93                         | 27.51  | 37.13                                           | 25.33  | 100.00                        | 33.47           | 21.58  | 28.43  | 24.81                             | 69.73   | 32.26           | 21.24           |
| Score                   | -0.25  | 1.00                          | 0.50                                            | 1.00                            | 1.00           | 1.00                          | 1.00           | 0.50                                            | 1.00                          | 1.00                          | 1.00           | 1.00                          | -0.27  | 1.00                          | -0.28  | 0.50                                            | -0.25  | 1.00                          | 1.00            | -0.22  | -0.28  | 0.50                              | -0.70   | 1.00            | 1.00            |
| Ion-type                |        | y <sup>++</sup> <sub>13</sub> | y <sup>++</sup> <sub>14</sub> -H <sub>2</sub> O | b <sub>e</sub> -NH <sub>3</sub> | b <sub>e</sub> | b <sup>++</sup> <sub>14</sub> | y <sub>e</sub> | y <sup>++</sup> <sub>15</sub> -H <sub>2</sub> O | y <sup>++</sup> <sub>15</sub> | b <sup>++</sup> <sub>16</sub> | b <sub>8</sub> | b <sup>++</sup> <sub>17</sub> |        | y <sup>++</sup> <sub>18</sub> |        | y <sup>++</sup> <sub>19</sub> -H <sub>2</sub> O |        | y <sup>++</sup> <sub>19</sub> | b <sub>10</sub> |        |        | y <sub>11</sub> -H <sub>2</sub> O |         | b <sub>11</sub> | b <sub>12</sub> |
| Delta Da                |        | 0.61                          | 0.39                                            | -0.73                           | 0.68           | -0.55                         | 0.48           | 0.53                                            | 0.54                          | 0.36                          | -0.76          | -0.69                         |        | 0.48                          |        | -0.78                                           |        | 0.23                          | 0.01            |        | 0.05   |                                   | 0.29    | 0.01            |                 |

# Peak 86

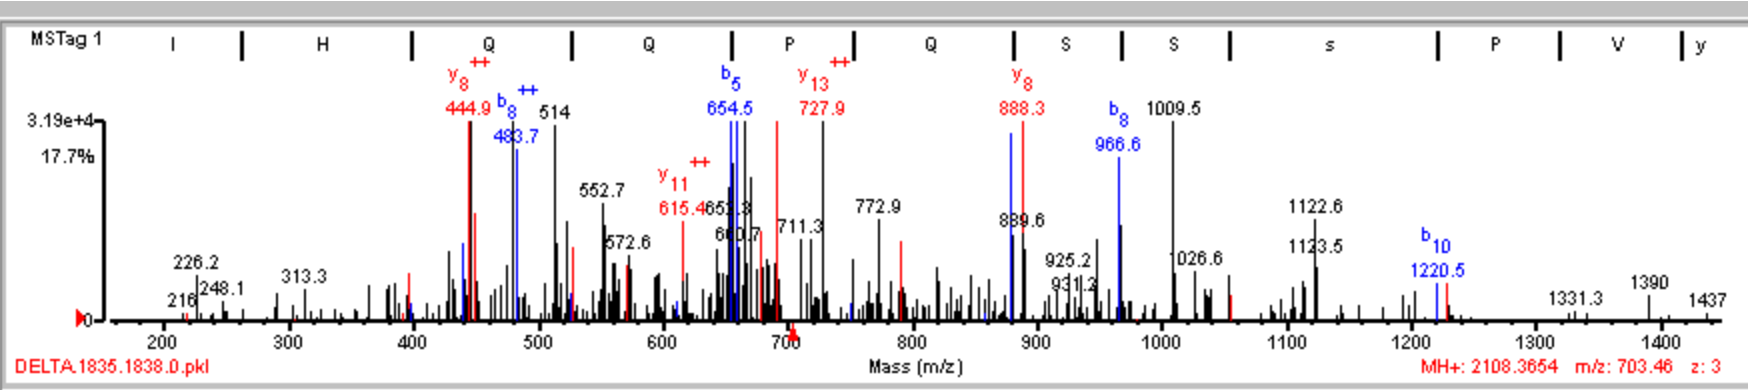

CID

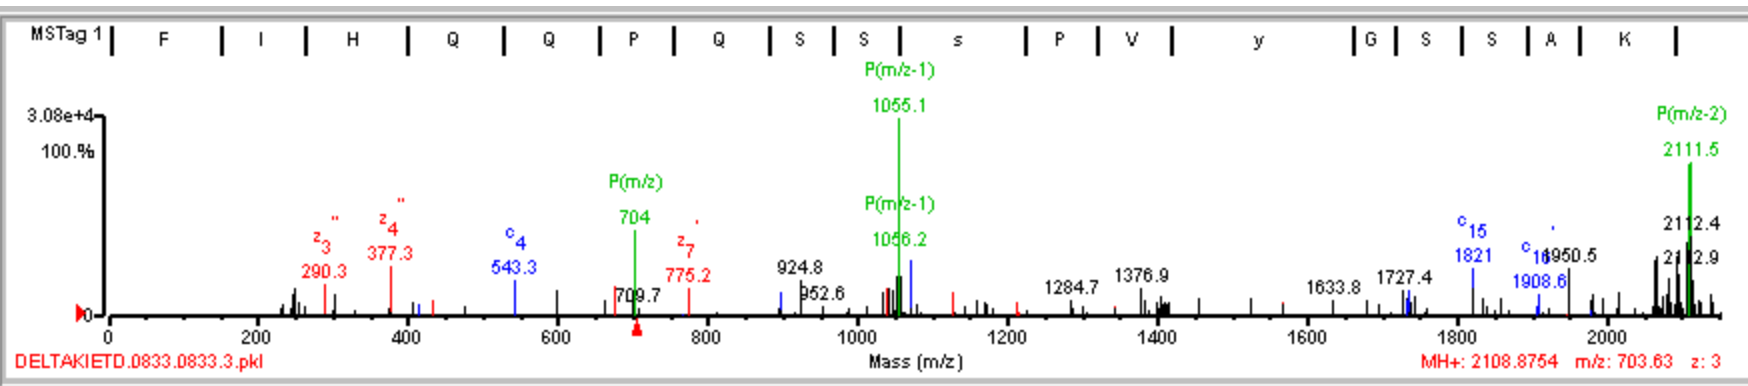

ETD

| Rank                    | Score            | SPI (%)        | BCS              | # Unmatched ions | Variable sites    | Sequence                                                              | MH <sup>+</sup> Calculated (Da) | MH <sup>+</sup> Error (Da) | MH <sup>+</sup> Error (ppm) | Protein MW/pl (Da) | Species      | Accession #                         | MS-Digest Index #     | Protein Name                        |                   |                                  |                |                |                |        |                                                 |         |         |
|-------------------------|------------------|----------------|------------------|------------------|-------------------|-----------------------------------------------------------------------|---------------------------------|----------------------------|-----------------------------|--------------------|--------------|-------------------------------------|-----------------------|-------------------------------------|-------------------|----------------------------------|----------------|----------------|----------------|--------|-------------------------------------------------|---------|---------|
| 1                       | 14.83            | 79.5           | 8                | 5/23             | Y88y S85s         | (R) F I H Q Q   P   Q   S   S   s   P   V   y   G   S   S   A   K (T) | 1947.96                         | 160.4095                   | 226.2                       | 60936.9/5.92       | Homo sapiens | <a href="#">4506345</a>             | <a href="#">37403</a> | paxillin                            |                   |                                  |                |                |                |        |                                                 |         |         |
| Fragment-ion (m/z)      | 444.90           | 449.30         | 479.40           | 483.73           | 513.99            | 527.47                                                                | 552.73                          | 571.70                     | 615.40                      | 652.31             | 654.46       | 659.32                              | 665.12                | 670.36                              | 678.95            | 719.13                           | 727.92         | 772.89         | 879.49         | 888.33 | 966.60                                          | 1009.50 | 1122.55 |
| Frac. Inten. (% of TIC) | 12.30            | 2.32           | 4.13             | 2.84             | 4.89              | 2.19                                                                  | 3.23                            | 2.01                       | 2.15                        | 4.08               | 11.98        | 5.39                                | 0.71                  | 0.13                                | 2.52              | 2.36                             | 11.85          | 2.21           | 4.01           | 6.33   | 4.31                                            | 4.19    | 3.86    |
| Rel. Inten. (% of BP)   | 100.00           | 18.88          | 33.61            | 23.09            | 39.73             | 17.82                                                                 | 26.26                           | 16.38                      | 17.47                       | 33.16              | 97.34        | 43.82                               | 5.77                  | 1.05                                | 20.46             | 19.20                            | 96.33          | 17.93          | 32.58          | 51.48  | 35.06                                           | 34.03   | 31.39   |
| Score                   | 1.00             | 1.00           | -0.34            | 1.00             | -0.40             | 1.00                                                                  | -0.26                           | 1.00                       | 1.00                        | -0.33              | 1.00         | 1.00                                | 0.25                  | 1.50                                | 1.00              | 0.50                             | 1.00           | 0.50           | 1.00           | 1.00   | 1.00                                            | -0.34   | 0.25    |
| Ion-type                | y <sup>++8</sup> | y <sub>5</sub> | b <sup>++8</sup> | b <sup>++9</sup> | y <sup>++10</sup> | y <sup>++11</sup>                                                     |                                 |                            | b <sub>5</sub>              | b <sup>++11</sup>  | st           | y <sup>++12</sup> -H <sub>2</sub> O | y <sup>++12</sup>     | y <sup>++13</sup> -H <sub>2</sub> O | y <sup>++13</sup> | y <sub>7</sub> -H <sub>2</sub> O | b <sub>7</sub> | y <sub>8</sub> | b <sub>8</sub> |        | b <sub>10</sub> -H <sub>3</sub> PO <sub>4</sub> |         |         |
| Delta Da                | 0.20             | 0.06           | -0.01            | 0.21             | -0.01             | 0.17                                                                  |                                 |                            | 0.12                        | 0.04               | 0.48         | 0.11                                | -0.31                 | 0.35                                | 0.14              | -0.43                            | 0.04           | -0.06          | 0.12           |        |                                                 | 0.02    |         |

# Peak 87

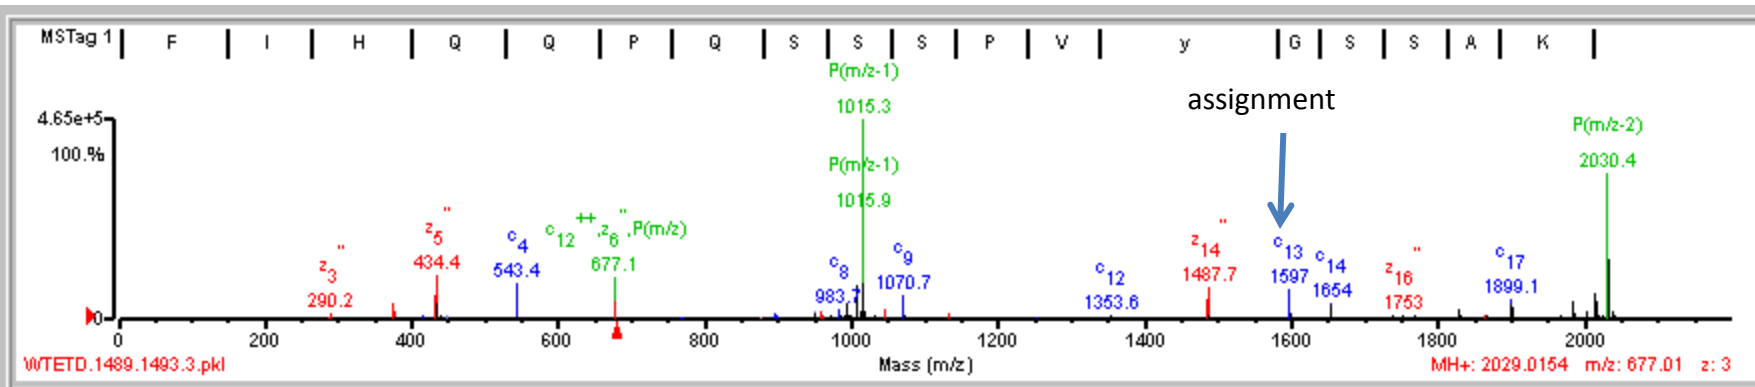

| Rank                    | Score                       | SPI (%)                     | BCS                         | # Unmatched ions            | Variable sites   | Sequence                                    | MH <sup>+</sup> Calculated (Da) | MH <sup>+</sup> Error (Da) | MH <sup>+</sup> Error (ppm) | Protein MW/pi (Da) | Species                      | Accession #             | MS-Digest Index #            | Protein Name    |                              |                              |                 |                 |                 |                 |                              |                              |         |                 |         |
|-------------------------|-----------------------------|-----------------------------|-----------------------------|-----------------------------|------------------|---------------------------------------------|---------------------------------|----------------------------|-----------------------------|--------------------|------------------------------|-------------------------|------------------------------|-----------------|------------------------------|------------------------------|-----------------|-----------------|-----------------|-----------------|------------------------------|------------------------------|---------|-----------------|---------|
| 1                       | 17.42                       | 91.2                        | 11                          | 3/25                        | Y88y             | (R) F I/H Q Q P Q S/S S P V\Y G S S\A\K (T) | 1947.96                         | 81.0595                    | 538.8                       | 60936.9/5.92       | Homo sapiens                 | <a href="#">4506345</a> | <a href="#">37403</a>        | paxillin        |                              |                              |                 |                 |                 |                 |                              |                              |         |                 |         |
| Fragment-ion (m/z)      | 290.24                      | 376.25                      | 433.39                      | 434.38                      | 449.21           | 543.43                                      | 896.66                          | 950.19                     | 959.69                      | 1031.90            | 1046.71                      | 1070.74                 | 1133.69                      | 1353.61         | 1486.77                      | 1487.68                      | 1596.16         | 1596.95         | 1653.97         | 1740.11         | 1752.96                      | 1829.26                      | 1867.52 | 1899.08         | 1900.95 |
| Frac. Inten. (% of TIC) | 1.21                        | 4.49                        | 3.78                        | 9.45                        | 1.07             | 7.95                                        | 2.07                            | 2.57                       | 3.04                        | 1.39               | 3.83                         | 6.80                    | 2.69                         | 1.24            | 3.09                         | 6.90                         | 1.83            | 10.65           | 6.08            | 1.79            | 2.16                         | 2.57                         | 1.45    | 5.92            | 5.97    |
| Rel. Inten. (% of BP)   | 11.35                       | 42.13                       | 35.54                       | 88.73                       | 10.09            | 74.64                                       | 19.40                           | 24.13                      | 28.60                       | 13.05              | 36.02                        | 63.88                   | 25.30                        | 11.69           | 29.02                        | 64.82                        | 17.22           | 100.00          | 57.07           | 16.80           | 20.31                        | 24.12                        | 13.65   | 55.65           | 56.03   |
| Score                   | 0.25                        | 1.00                        | 1.00                        | 0.25                        | 1.00             | 1.00                                        | 1.00                            | 1.00                       | 1.00                        | -0.13              | 1.00                         | 1.00                    | 1.00                         | 1.00            | 1.00                         | 0.25                         | 1.00            | 1.00            | 1.00            | 1.00            | 0.25                         | 0.25                         | -0.14   | 1.00            | -0.56   |
| Ion-type                | z <sub>3</sub> <sup>+</sup> | z <sub>4</sub> <sup>+</sup> | z <sub>5</sub> <sup>+</sup> | z <sub>5</sub> <sup>+</sup> | c <sub>++7</sub> | c <sub>4</sub>                              | c <sub>7</sub>                  | c <sub>++17</sub>          | z <sub>9</sub> <sup>+</sup> |                    | z <sub>10</sub> <sup>+</sup> | c <sub>9</sub>          | z <sub>11</sub> <sup>+</sup> | c <sub>12</sub> | z <sub>14</sub> <sup>+</sup> | z <sub>14</sub> <sup>+</sup> | c <sub>13</sub> | c <sub>13</sub> | c <sub>14</sub> | c <sub>15</sub> | z <sub>16</sub> <sup>+</sup> | c <sub>16</sub> <sup>+</sup> |         | c <sub>17</sub> |         |
| Delta Da                | 0.07                        | 0.05                        | 0.17                        | 0.16                        | 0.47             | 0.13                                        | 0.19                            | 0.26                       | 0.29                        |                    | 0.28                         | 0.20                    | 0.23                         | -0.08           | 0.14                         | 0.04                         | -0.56           | 0.23            | 0.23            | -0.66           | 0.20                         | 0.45                         |         | 0.24            |         |

# Peak 88

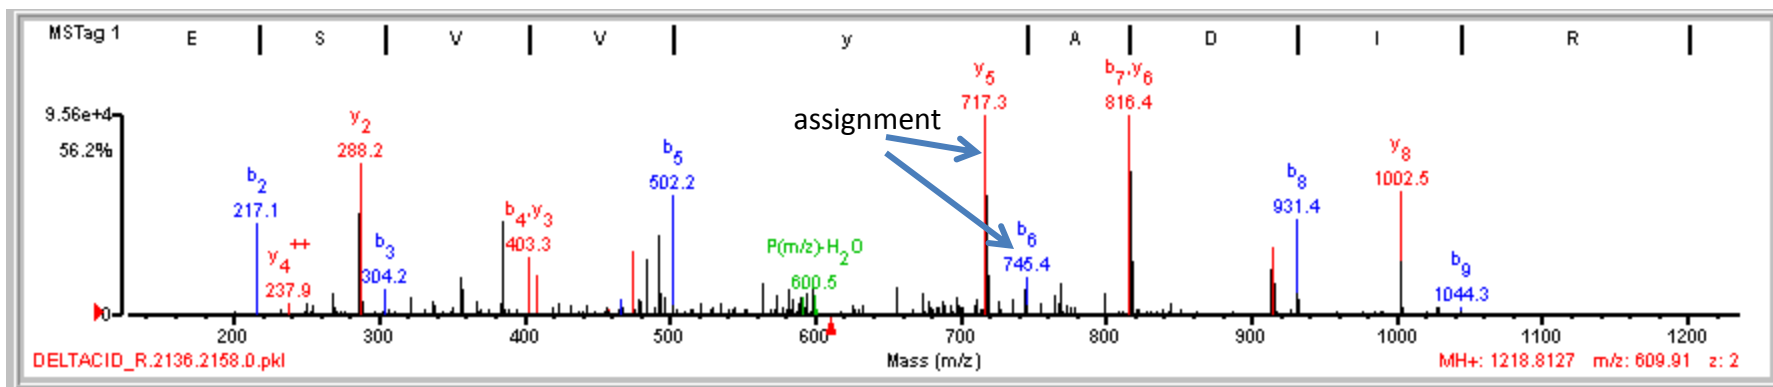

| Rank                    | Score          | SPI (%)                          | BCS            | # Unmatched Ions | Variable sites                   | Sequence                                    | MH <sup>+</sup> Calculated (Da) | MH <sup>+</sup> Error (Da) | MH <sup>+</sup> Error (ppm)      | Protein MW/pI (Da)                 | Species        | Accession #             | MS-Digest Index #    | Protein Name                         |                                  |                |                |                |
|-------------------------|----------------|----------------------------------|----------------|------------------|----------------------------------|---------------------------------------------|---------------------------------|----------------------------|----------------------------------|------------------------------------|----------------|-------------------------|----------------------|--------------------------------------|----------------------------------|----------------|----------------|----------------|
| 1                       | 14.38          | 97.5                             | 7              | 1/18             | Y263y                            | (K) S E   S   V   V   y   A   D   I   R (K) | 1138.57                         | 80.2388                    | 223.6                            | 29082.3/8.85                       | Homo sapiens   | <a href="#">4506357</a> | <a href="#">9527</a> | myelin protein zero-like 1 isoform a |                                  |                |                |                |
| Fragment-ion (m/z)      | 217.06         | 286.08                           | 288.23         | 357.17           | 385.19                           | 403.29                                      | 408.82                          | 474.36                     | 484.26                           | 492.92                             | 502.21         | 717.32                  | 745.39               | 816.42                               | 913.40                           | 915.60         | 931.36         | 1002.51        |
| Frac. Inten. (% of TIC) | 3.61           | 4.09                             | 6.32           | 2.51             | 4.89                             | 2.41                                        | 1.69                            | 2.48                       | 2.51                             | 3.85                               | 5.27           | 18.28                   | 2.06                 | 20.65                                | 2.63                             | 4.22           | 5.50           | 7.05           |
| Rel. Inten. (% of BP)   | 17.49          | 19.79                            | 30.59          | 12.14            | 23.66                            | 11.65                                       | 8.19                            | 12.01                      | 12.14                            | 18.64                              | 25.50          | 88.51                   | 9.95                 | 100.00                               | 12.73                            | 20.44          | 26.62          | 34.15          |
| Score                   | 1.00           | 0.50                             | 1.00           | -0.12            | 0.50                             | 1.00                                        | 1.00                            | 1.00                       | 1.00                             | 0.50                               | 1.00           | 1.00                    | 1.00                 | 1.00                                 | 0.50                             | 1.00           | 1.00           | 1.00           |
| Ion-type                | b <sub>2</sub> | b <sub>3</sub> -H <sub>2</sub> O | y <sub>2</sub> |                  | b <sub>4</sub> -H <sub>2</sub> O | b <sub>4</sub>                              | y <sub>4</sub> ++               | a <sub>5</sub>             | b <sub>5</sub> -H <sub>2</sub> O | y <sub>5</sub> ++-H <sub>2</sub> O | b <sub>5</sub> | a <sub>6</sub>          | b <sub>6</sub>       | b <sub>7</sub>                       | b <sub>8</sub> -H <sub>2</sub> O | y <sub>7</sub> | b <sub>8</sub> | y <sub>8</sub> |
| Delta Da                | -0.02          | -0.02                            | 0.03           |                  | 0.02                             | 0.11                                        | 0.13                            | 0.10                       | 0.02                             | 0.19                               | -0.04          | 0.03                    | 0.11                 | 0.10                                 | 0.07                             | 0.17           | 0.02           | 0.04           |
|                         |                |                                  |                |                  | y <sub>3</sub> -H <sub>2</sub> O | y <sub>3</sub>                              |                                 | y <sub>4</sub>             |                                  | y <sub>5</sub> ++                  | y <sub>5</sub> |                         |                      |                                      |                                  |                |                |                |
|                         |                |                                  |                |                  | -0.03                            | 0.06                                        |                                 | 0.09                       |                                  | 0.47                               | 0.02           |                         |                      |                                      |                                  |                |                |                |

# Peak 89

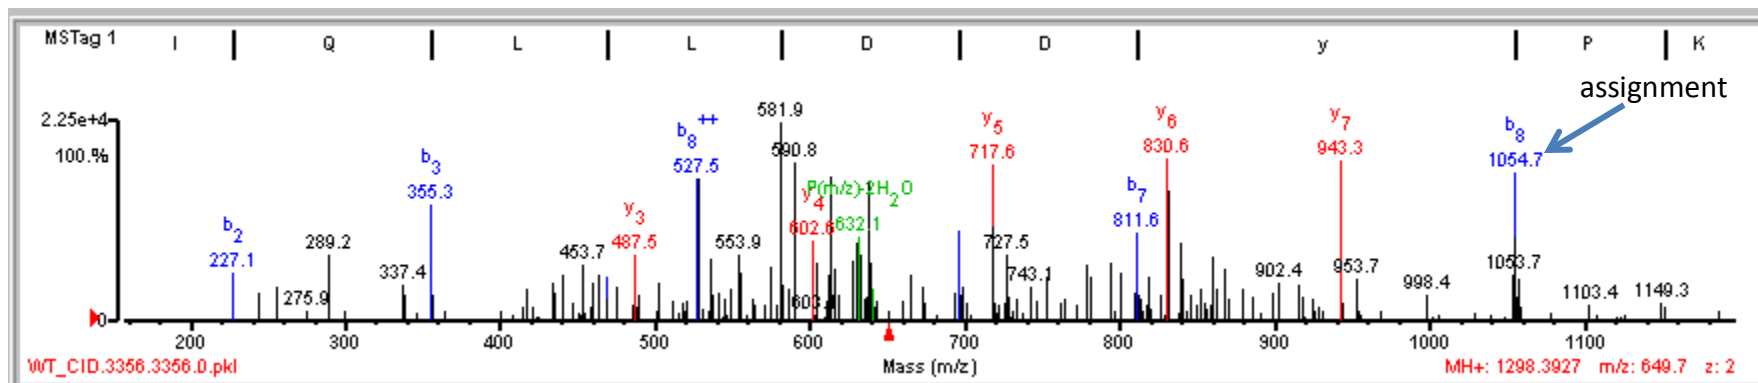

| Rank | Score | SPI (%) | BCS | # Unmatched Ions | Variable sites | Sequence                                | MH <sup>+</sup> Calculated (Da) | MH <sup>+</sup> Error (Da) | MH <sup>+</sup> Error (ppm) | Protein MW/pl (Da) | Species      | Accession #              | MS-Digest Index #     | Protein Name         |
|------|-------|---------|-----|------------------|----------------|-----------------------------------------|---------------------------------|----------------------------|-----------------------------|--------------------|--------------|--------------------------|-----------------------|----------------------|
| 1    | 7.18  | 78.2    | 6   | 4/13             | Y24y           | (K) I I Q   L / L   D \ D \ Y \ P K (C) | 1217.68                         | 80.7151                    | 576.7                       | 34273.7/5.72       | Homo sapiens | <a href="#">4506667</a>  | <a href="#">5743</a>  | ribosomal protein P0 |
| 1    | 7.18  | 78.2    | 6   | 4/13             | Y24y           | (K) I I Q   L / L   D \ D \ Y \ P K (C) | 1217.68                         | 80.7151                    | 576.7                       | 34273.7/5.72       | Homo sapiens | <a href="#">16933546</a> | <a href="#">36729</a> | ribosomal protein P0 |

  

| Fragment-ion (m/z)      | 355.29         | 527.53                       | 581.93         | 590.85 | 613.82 | 638.65 | 696.25         | 717.62         | 811.55         | 830.64         | 839.59 | 943.30         | 1054.68                                         |
|-------------------------|----------------|------------------------------|----------------|--------|--------|--------|----------------|----------------|----------------|----------------|--------|----------------|-------------------------------------------------|
| Frac. Inten. (% of TIC) | 4.90           | 11.99                        | 9.26           | 6.14   | 5.59   | 5.43   | 4.54           | 11.59          | 6.10           | 11.67          | 4.69   | 7.40           | 10.70                                           |
| Rel. Inten. (% of BP)   | 40.88          | 100.00                       | 77.23          | 51.21  | 46.59  | 45.31  | 37.90          | 96.69          | 50.91          | 97.33          | 39.10  | 61.73          | 89.25                                           |
| Score                   | 1.00           | 1.00                         | 1.00           | -0.51  | -0.47  | -0.45  | 1.00           | 1.00           | 1.00           | 1.00           | -0.39  | 1.00           | 1.00                                            |
| Ion-type                | b <sub>3</sub> | b <sup>++</sup> <sub>8</sub> | b <sub>5</sub> |        |        |        | b <sub>e</sub> | y <sub>5</sub> | b <sub>7</sub> | y <sub>e</sub> |        | y <sub>7</sub> | b <sub>8</sub>                                  |
| Delta Da                | 0.06           | -0.22                        | 0.53           |        |        |        | -0.18          | 0.37           | 0.09           | 0.31           |        | -0.12          | 0.19<br>y <sub>e</sub> -NH <sub>3</sub><br>0.23 |

# Peak 90

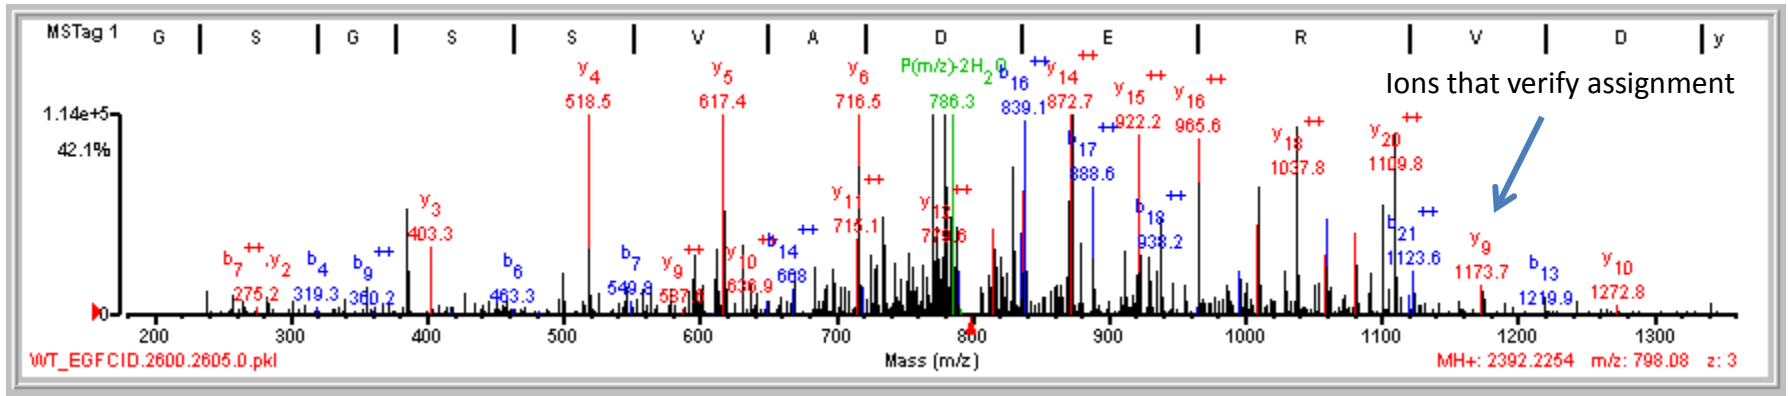

| Rank | Score | SPI (%) | BCS | # Unmatched Ions | Variable sites | Sequence                                                      | MH <sup>+</sup> Calculated (Da) | MH <sup>+</sup> Error (Da) | MH <sup>+</sup> Error (ppm) | Protein MW/pI (Da) | Species      | Accession #              | MS-Digest Index #     | Protein Name                                |
|------|-------|---------|-----|------------------|----------------|---------------------------------------------------------------|---------------------------------|----------------------------|-----------------------------|--------------------|--------------|--------------------------|-----------------------|---------------------------------------------|
| 1    | 17.17 | 85.9    | 13  | 4/24             | Y689y          | (K) S S/G/S/G/S/S/V/A/D E R V D y   V   V   V   D Q \ Q K (T) | 2312.10                         | 80.1254                    | 66.5                        | 80005.5/5.95       | Homo sapiens | <a href="#">46370071</a> | <a href="#">10706</a> | GRB2-associated binding protein 1 isoform a |
| 1    | 17.17 | 85.9    | 13  | 4/24             | Y659y          | (K) S S/G/S/G/S/S/V/A/D E R V D y   V   V   V   D Q \ Q K (T) | 2312.10                         | 80.1254                    | 66.5                        | 76616.7/5.63       | Homo sapiens | <a href="#">46370073</a> | <a href="#">25875</a> | GRB2-associated binding protein 1 isoform b |

  

| Fragment-ion (m/z)     | 385.30 | 518.51         | 617.39         | 716.53         | 770.69 | 774.37 | 780.31                                          | 788.75                        | 815.63         | 821.24 | 829.92                                          | 837.29                        | 839.10                        | 872.70                        | 888.59                        | 922.20                        | 938.51                        | 965.62                        | 1009.51                       | 1038.23                       | 1059.47                       | 1081.11                       | 1100.92                                         | 1109.79                       |
|------------------------|--------|----------------|----------------|----------------|--------|--------|-------------------------------------------------|-------------------------------|----------------|--------|-------------------------------------------------|-------------------------------|-------------------------------|-------------------------------|-------------------------------|-------------------------------|-------------------------------|-------------------------------|-------------------------------|-------------------------------|-------------------------------|-------------------------------|-------------------------------------------------|-------------------------------|
| Frac. Inten.(% of TIC) | 2.53   | 4.12           | 5.60           | 8.72           | 7.74   | 1.92   | 7.99                                            | 1.91                          | 2.96           | 1.94   | 3.28                                            | 2.39                          | 4.22                          | 10.62                         | 3.25                          | 4.33                          | 1.95                          | 5.42                          | 2.73                          | 4.61                          | 2.69                          | 2.19                          | 2.05                                            | 4.84                          |
| Rel. Inten.(% of BP)   | 23.86  | 38.83          | 52.73          | 82.10          | 72.88  | 18.09  | 75.25                                           | 18.03                         | 27.83          | 18.27  | 30.89                                           | 22.49                         | 39.73                         | 100.00                        | 30.63                         | 40.77                         | 18.40                         | 51.05                         | 25.68                         | 43.42                         | 25.32                         | 20.63                         | 19.27                                           | 45.62                         |
| Score                  | -0.24  | 1.00           | 1.00           | 1.00           | -0.73  | -0.18  | 0.50                                            | 1.00                          | 1.00           | -0.18  | 0.50                                            | 1.00                          | 1.00                          | 1.00                          | 1.00                          | 1.00                          | 1.00                          | 1.00                          | 1.00                          | 1.00                          | 1.00                          | 1.00                          | 0.50                                            | 1.00                          |
| Ion-type               |        | y <sub>4</sub> | y <sub>5</sub> | y <sub>6</sub> |        |        | b <sup>++</sup> <sub>15</sub> -H <sub>2</sub> O | b <sup>++</sup> <sub>15</sub> | y <sub>7</sub> |        | b <sup>++</sup> <sub>16</sub> -H <sub>2</sub> O | y <sup>++</sup> <sub>13</sub> | b <sup>++</sup> <sub>16</sub> | y <sup>++</sup> <sub>14</sub> | b <sup>++</sup> <sub>17</sub> | y <sup>++</sup> <sub>15</sub> | b <sup>++</sup> <sub>18</sub> | y <sup>++</sup> <sub>16</sub> | y <sup>++</sup> <sub>17</sub> | y <sup>++</sup> <sub>18</sub> | b <sup>++</sup> <sub>20</sub> | y <sup>++</sup> <sub>19</sub> | y <sup>++</sup> <sub>20</sub> -H <sub>2</sub> O | y <sup>++</sup> <sub>20</sub> |
| Delta Da               |        | 0.25           | 0.06           | 0.14           |        |        | 0.01                                            | -0.56                         | 0.17           |        | 0.08                                            | 0.41                          | 0.26                          | 0.30                          | 0.21                          | 0.26                          | 0.60                          | 0.17                          | 0.54                          | 0.75                          | 0.02                          | 0.12                          | 0.42                                            | 0.29                          |



# Peak 91

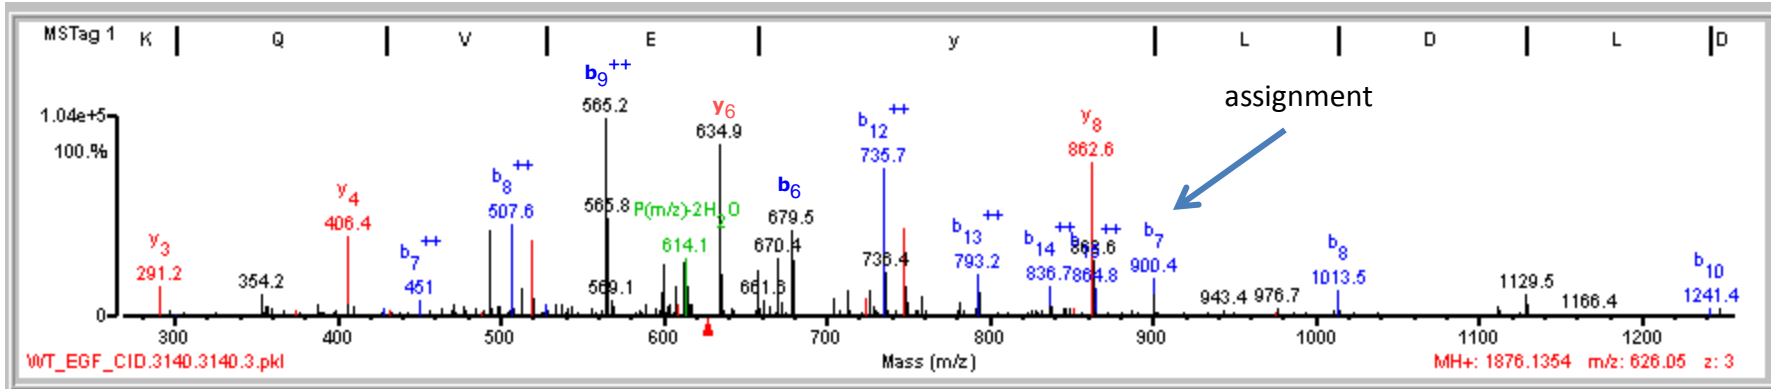

## Search Results

| Rank | Score | SPI (%) | BCS | # Unmatched Ions | Variable sites | Sequence                                     | MH <sup>+</sup> Calculated (Da) | MH <sup>+</sup> Error (Da) | MH <sup>+</sup> Error (ppm) | Protein MW/pl (Da) | Species      | Accession #              | MS-Digest Index #     | Protein Name                                |
|------|-------|---------|-----|------------------|----------------|----------------------------------------------|---------------------------------|----------------------------|-----------------------------|--------------------|--------------|--------------------------|-----------------------|---------------------------------------------|
| 1    | 15.89 | 85.8    | 10  | 6/24             | Y657y          | (K)G D K Q V E Y L D I L D I L D I S G K (S) | 1794.88                         | 81.2598                    | 689.5                       | 80005.5/5.95       | Homo sapiens | <a href="#">46370071</a> | <a href="#">10706</a> | GRB2-associated binding protein 1 isoform a |
| 1    | 15.89 | 85.8    | 10  | 6/24             | Y627y          | (K)G D K Q V E Y L D I L D I L D I S G K (S) | 1794.88                         | 81.2598                    | 689.5                       | 76616.7/5.63       | Homo sapiens | <a href="#">46370073</a> | <a href="#">25875</a> | GRB2-associated binding protein 1 isoform b |

  

| Fragment-ion (m/z)      | 291.23         | 406.41         | 493.56 | 507.65                       | 512.91 | 519.68         | 528.50         | 565.23                       | 600.64 | 608.12 | 634.93         | 657.91         | 670.37                                          | 679.49                        | 713.49 | 726.60                                          | 735.74                        | 747.71         | 793.20                        | 836.66                        | 862.62         | 900.44         | 1013.53         | 1129.48 |
|-------------------------|----------------|----------------|--------|------------------------------|--------|----------------|----------------|------------------------------|--------|--------|----------------|----------------|-------------------------------------------------|-------------------------------|--------|-------------------------------------------------|-------------------------------|----------------|-------------------------------|-------------------------------|----------------|----------------|-----------------|---------|
| Frac. Inten. (% of TIC) | 1.33           | 4.00           | 5.30   | 4.38                         | 1.16   | 4.18           | 1.15           | 12.77                        | 2.62   | 2.20   | 9.79           | 2.47           | 2.53                                            | 6.39                          | 1.41   | 1.18                                            | 8.94                          | 6.18           | 3.74                          | 2.19                          | 10.39          | 2.95           | 1.19            | 1.56    |
| Rel. Inten. (% of BP)   | 10.38          | 31.36          | 41.48  | 34.32                        | 9.05   | 32.76          | 9.04           | 100.00                       | 20.51  | 17.22  | 76.68          | 19.36          | 19.81                                           | 50.03                         | 11.01  | 9.24                                            | 70.03                         | 48.41          | 29.30                         | 17.17                         | 81.36          | 23.08          | 9.32            | 12.23   |
| Score                   | 1.00           | 1.00           | -0.41  | 1.00                         | -0.09  | 1.00           | 1.00           | 1.00                         | -0.21  | -0.17  | 1.00           | 1.00           | 0.50                                            | 1.00                          | -0.11  | 0.50                                            | 1.00                          | 1.00           | 1.00                          | 1.00                          | 1.00           | 1.00           | 1.00            | -0.12   |
| Ion-type                | y <sub>3</sub> | y <sub>4</sub> |        | b <sub>7</sub> <sup>++</sup> |        | y <sub>5</sub> | b <sub>6</sub> | b <sub>9</sub> <sup>++</sup> |        |        | y <sub>6</sub> | b <sub>6</sub> | b <sub>11</sub> <sup>++</sup> -H <sub>2</sub> O | b <sub>11</sub> <sup>++</sup> |        | b <sub>12</sub> <sup>++</sup> -H <sub>2</sub> O | b <sub>12</sub> <sup>++</sup> | y <sub>7</sub> | b <sub>13</sub> <sup>++</sup> | b <sub>14</sub> <sup>++</sup> | y <sub>8</sub> | b <sub>7</sub> | b <sub>10</sub> |         |
| Delta Da                | 0.06           | 0.22           |        | 0.43                         |        | 0.40           | 0.22           | 0.50                         |        |        | 0.63           | 0.59           | 0.59                                            | 0.70                          |        | 0.27                                            | 0.41                          | 0.32           | 0.35                          | 0.30                          | 0.20           | 0.09           | 0.10            |         |

# Peak 92

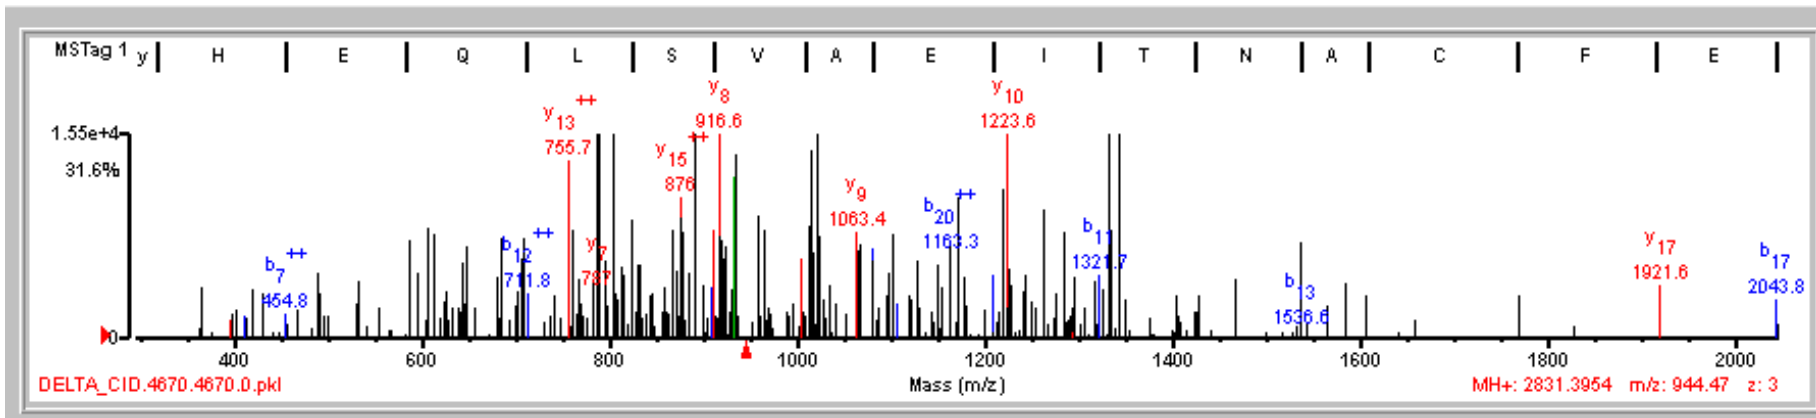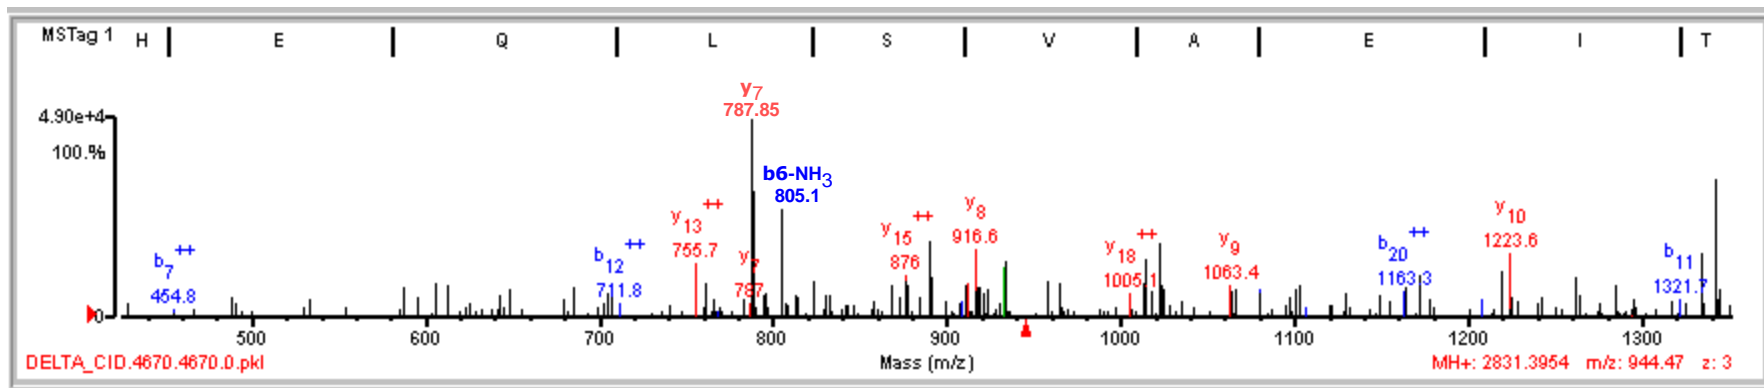

| Rank | Score | SPI (%) | BCS | # Unmatched Ions | Variable sites | Sequence                                                        | MH <sup>+</sup> Calculated (Da) | MH <sup>+</sup> Error (Da) | MH <sup>+</sup> Error (ppm) | Protein MW/pl (Da) | Species      | Accession #               | MS-Digest Index #     | Protein Name               |
|------|-------|---------|-----|------------------|----------------|-----------------------------------------------------------------|---------------------------------|----------------------------|-----------------------------|--------------------|--------------|---------------------------|-----------------------|----------------------------|
| 1    | 11.03 | 86.0    | 8   | 3/17             | Y282y          | (K) A Y H E Q L S V A E I T N A / C / F / E I P A N Q M V K (C) | 2750.29                         | 81.1042                    | 401.9                       | 49916.9/4.97       | Homo sapiens | <a href="#">46409270</a>  | <a href="#">1613</a>  | tubulin, alpha 3e          |
| 1    | 11.03 | 86.0    | 8   | 3/17             | Y282y          | (K) A Y H E Q L S V A E I T N A / C / F / E I P A N Q M V K (C) | 2750.29                         | 81.1042                    | 401.9                       | 49959.8/4.97       | Homo sapiens | <a href="#">17921993</a>  | <a href="#">30820</a> | tubulin, alpha 3c          |
| 1    | 11.03 | 86.0    | 8   | 3/17             | Y282y          | (K) A Y H E Q L S V A E I T N A / C / F / E I P A N Q M V K (C) | 2750.29                         | 81.1042                    | 401.9                       | 50135.9/4.94       | Homo sapiens | <a href="#">17986283</a>  | <a href="#">31764</a> | tubulin, alpha 1a          |
| 1    | 11.03 | 86.0    | 8   | 3/17             | Y282y          | (K) A Y H E Q L S V A E I T N A / C / F / E I P A N Q M V K (C) | 2750.29                         | 81.1042                    | 401.9                       | 49959.8/4.97       | Homo sapiens | <a href="#">156564363</a> | <a href="#">32253</a> | tubulin, alpha 3d          |
| 1    | 11.03 | 86.0    | 8   | 3/17             | Y282y          | (K) A Y H E Q L S V A E I T N A / C / F / E I P A N Q M V K (C) | 2750.29                         | 81.1042                    | 401.9                       | 50151.9/4.94       | Homo sapiens | <a href="#">57013276</a>  | <a href="#">34672</a> | tubulin, alpha, ubiquitous |
| 1    | 11.03 | 86.0    | 8   | 3/17             | Y282y          | (K) A Y H E Q L S V A E I T N A / C / F / E I P A N Q M V K (C) | 2750.29                         | 81.1042                    | 401.9                       | 49924.7/4.95       | Homo sapiens | <a href="#">17921989</a>  | <a href="#">36946</a> | tubulin, alpha 4a          |

| Fragment-ion (m/z)     | 755.66            | 787.85         | 794.66         | 805.10                          | 876.05            | 890.25 | 910.95 | 916.58         | 918.45                               | 1013.96 | 1022.91            | 1063.43        | 1079.66        | 1163.31            | 1223.64         | 1334.11                              | 1343.13            |
|------------------------|-------------------|----------------|----------------|---------------------------------|-------------------|--------|--------|----------------|--------------------------------------|---------|--------------------|----------------|----------------|--------------------|-----------------|--------------------------------------|--------------------|
| Frac. Inten.(% of TIC) | 3.07              | 19.31          | 3.30           | 6.28                            | 6.35              | 6.75   | 3.75   | 5.33           | 3.46                                 | 5.41    | 6.49               | 3.64           | 2.92           | 3.13               | 4.17            | 6.30                                 | 10.34              |
| Rel. Inten.(% of BP)   | 15.87             | 100.00         | 17.08          | 32.52                           | 32.87             | 34.98  | 19.40  | 27.58          | 17.94                                | 28.03   | 33.61              | 18.87          | 15.11          | 16.21              | 21.59           | 32.62                                | 53.53              |
| Score                  | 1.00              | 1.00           | 0.25           | 0.50                            | 1.00              | -0.35  | -0.19  | 1.00           | -0.18                                | 0.50    | 1.00               | 1.00           | 1.00           | 1.00               | 1.00            | 0.50                                 | 1.00               |
| Ion-type               | y <sup>++13</sup> | y <sub>7</sub> | a <sub>6</sub> | b <sub>6</sub> -NH <sub>3</sub> | y <sup>++15</sup> |        |        | y <sub>8</sub> | b <sup>+++17</sup> -H <sub>2</sub> O |         | b <sup>+++17</sup> | y <sub>9</sub> | b <sub>9</sub> | b <sup>+++20</sup> | y <sub>10</sub> | b <sup>+++23</sup> -H <sub>2</sub> O | b <sup>+++23</sup> |
| Delta Da               | 0.32              | 0.44           | 0.34           | -0.19                           | -0.36             |        |        | 0.12           |                                      | 0.54    | 0.48               | -0.09          | 0.20           | -0.19              | 0.09            | 0.54                                 | 0.55               |

# Peak 93

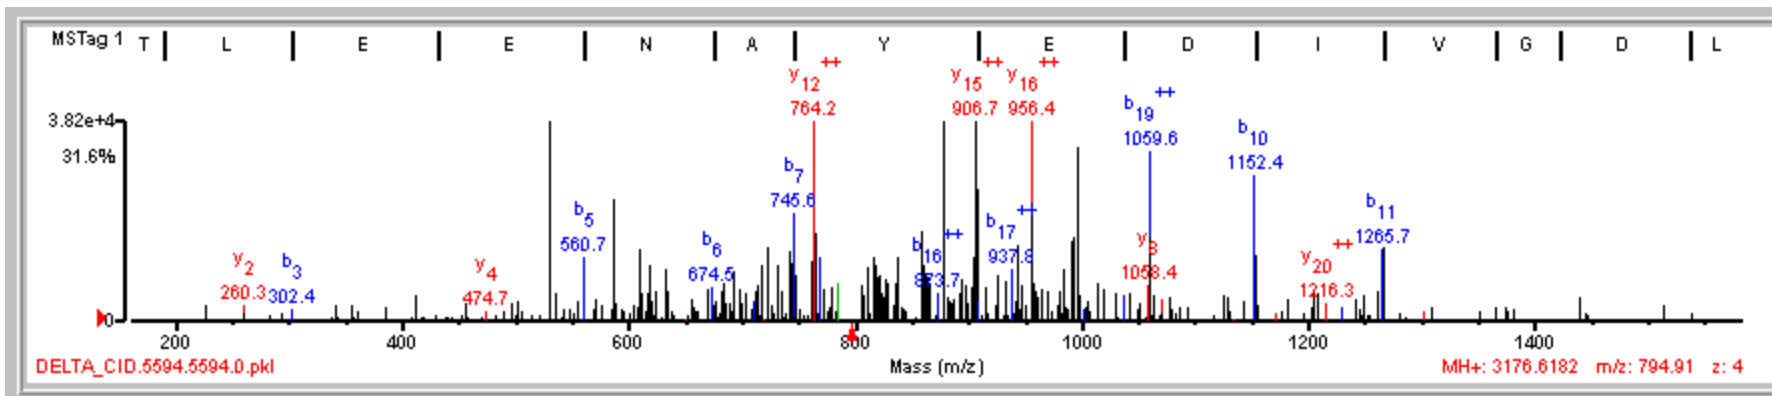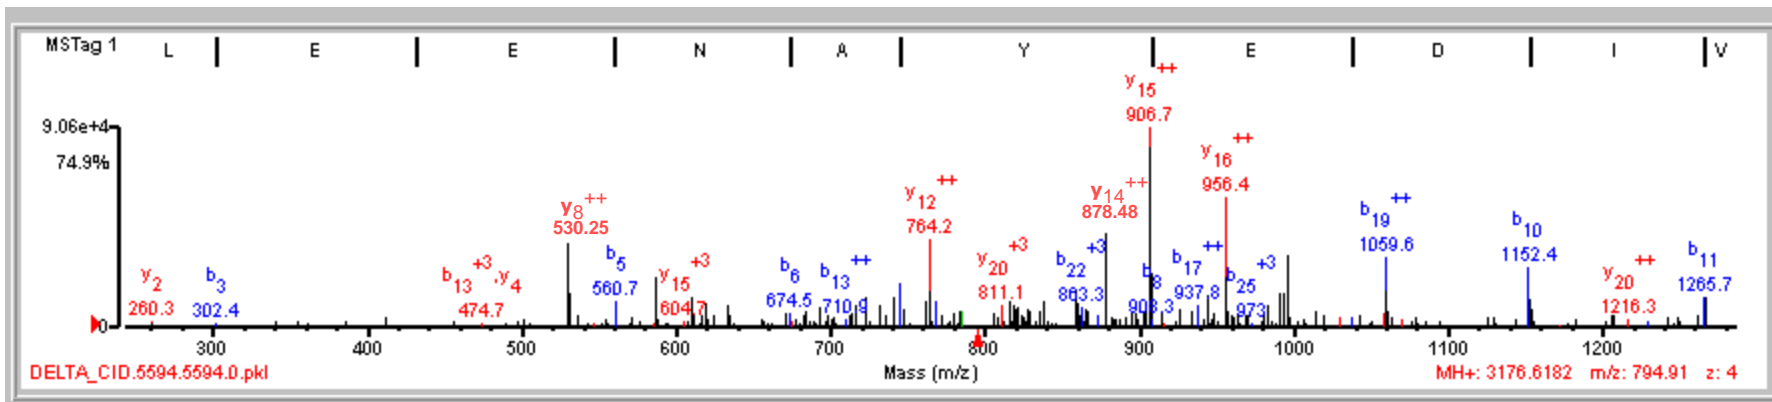

| Rank | Score | SPI (%) | BCS | # Unmatched Ions | Variable sites | Sequence                                                           | MH <sup>+</sup> Calculated (Da) | MH <sup>+</sup> Error (Da) | MH <sup>+</sup> Error (ppm) | Protein MW/pl (Da) | Species      | Accession #              | MS-Digest Index #     | Protein Name                              |
|------|-------|---------|-----|------------------|----------------|--------------------------------------------------------------------|---------------------------------|----------------------------|-----------------------------|--------------------|--------------|--------------------------|-----------------------|-------------------------------------------|
| 1    | 11.59 | 88.7    | 9   | 4/16             | Y501y          | (K) S T/L E E N A \Y E D I V/G/D I/L/P K E N I P Y E D V D L K (S) | 3095.46                         | 81.1603                    | 375.8                       | 126485.3/9.35      | Homo sapiens | <a href="#">47132532</a> | <a href="#">10009</a> | suppression of tumorigenicity 5 isoform 1 |
| 1    | 11.59 | 88.7    | 9   | 4/16             | Y81y           | (K) S T/L E E N A \Y E D I V/G/D I/L/P K E N I P Y E D V D L K (S) | 3095.46                         | 81.1603                    | 375.8                       | 82079.2/9.09       | Homo sapiens | <a href="#">21264614</a> | <a href="#">11507</a> | suppression of tumorigenicity 5 isoform 2 |
| 1    | 11.59 | 88.7    | 9   | 4/16             | Y501y          | (K) S T/L E E N A \Y E D I V/G/D I/L/P K E N I P Y E D V D L K (S) | 3095.46                         | 81.1603                    | 375.8                       | 126485.3/9.35      | Homo sapiens | <a href="#">47132529</a> | <a href="#">19360</a> | suppression of tumorigenicity 5 isoform 1 |

| Fragment-ion (m/z)      | 530.25           | 587.76 | 610.19 | 619.71 | 744.65         | 764.25            | 768.16            | 820.89            | 860.73 | 878.48            | 906.71            | 956.35            | 997.05            | 1059.59           | 1152.36         | 1265.66         |
|-------------------------|------------------|--------|--------|--------|----------------|-------------------|-------------------|-------------------|--------|-------------------|-------------------|-------------------|-------------------|-------------------|-----------------|-----------------|
| Frac. Inten. (% of TIC) | 7.05             | 3.20   | 2.29   | 2.33   | 3.90           | 7.30              | 2.40              | 2.12              | 3.48   | 6.15              | 27.27             | 10.47             | 5.13              | 6.81              | 6.29            | 3.82            |
| Rel. Inten. (% of BP)   | 25.85            | 11.73  | 8.40   | 8.54   | 14.30          | 26.78             | 8.80              | 7.78              | 12.76  | 22.55             | 100.00            | 38.39             | 18.80             | 24.96             | 23.08           | 14.00           |
| Score                   | 1.00             | -0.12  | -0.08  | -0.09  | 1.00           | 1.00              | 1.00              | 1.00              | -0.13  | 1.00              | 1.00              | 1.00              | 1.00              | 1.00              | 1.00            | 1.00            |
| Ion-type                | y <sup>++8</sup> |        |        |        | b <sub>7</sub> | y <sup>++12</sup> | b <sup>++14</sup> | y <sup>++13</sup> |        | y <sup>++14</sup> | y <sup>++15</sup> | y <sup>++16</sup> | y <sup>++25</sup> | b <sup>++19</sup> | b <sub>10</sub> | b <sub>11</sub> |
| Delta Da                | 0.52             |        |        |        | -0.69          | 0.41              | -0.68             | 0.51              |        | 0.58              | 0.30              | 0.41              | 0.60              | 0.09              | -0.11           | 0.11            |

# Peak 94

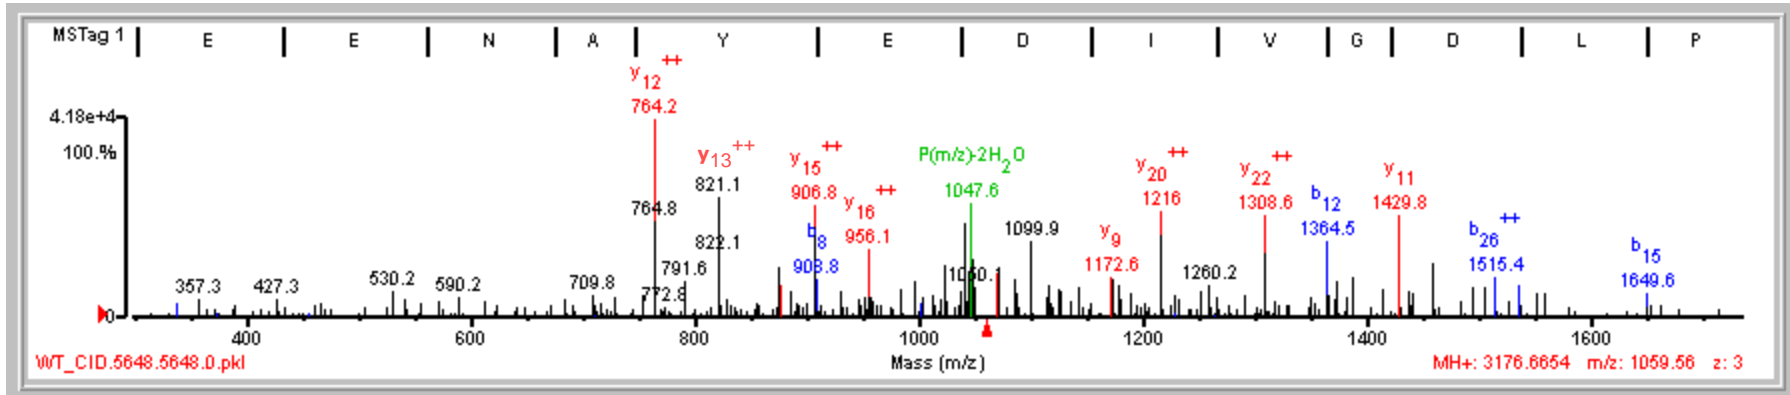

## Search Results

| Rank | Score | SPI (%) | BCS | # Unmatched Ions | Variable sites | Sequence                                                      | MH <sup>+</sup> Calculated (Da) | MH <sup>+</sup> Error (Da) | MH <sup>+</sup> Error (ppm) | Protein MW/pI (Da) | Species      | Accession #              | MS-Digest Index #     | Protein Name                              |
|------|-------|---------|-----|------------------|----------------|---------------------------------------------------------------|---------------------------------|----------------------------|-----------------------------|--------------------|--------------|--------------------------|-----------------------|-------------------------------------------|
| 1    | 12.05 | 72.6    | 13  | 10/25            | Y501y          | (K) S T/L E E/N A/Y E/D/I/V/G/D/L/P K E/N P Y E D V D\L\R (S) | 3095.46                         | 81.2075                    | 390.7                       | 126485.3/9.35      | Homo sapiens | <a href="#">47132532</a> | <a href="#">10009</a> | suppression of tumorigenicity 5 isoform 1 |
| 1    | 12.05 | 72.6    | 13  | 10/25            | Y81y           | (K) S T/L E E/N A/Y E/D/I/V/G/D/L/P K E/N P Y E D V D\L\R (S) | 3095.46                         | 81.2075                    | 390.7                       | 82079.2/9.09       | Homo sapiens | <a href="#">21264614</a> | <a href="#">11507</a> | suppression of tumorigenicity 5 isoform 2 |
| 1    | 12.05 | 72.6    | 13  | 10/25            | Y501y          | (K) S T/L E E/N A/Y E/D/I/V/G/D/L/P K E/N P Y E D V D\L\R (S) | 3095.46                         | 81.2075                    | 390.7                       | 126485.3/9.35      | Homo sapiens | <a href="#">47132529</a> | <a href="#">19360</a> | suppression of tumorigenicity 5 isoform 1 |

| Fragment-ion (m/z)      | 764.21                        | 821.07                        | 875.01 | 877.39                        | 906.75                        | 956.11                        | 996.72                         | 1013.00                       | 1022.82 | 1040.85                         | 1070.08                       | 1086.39 | 1099.93 | 1115.93 | 1126.18 | 1142.53 | 1172.63        | 1179.66 | 1216.05                       | 1308.60                       | 1364.54         | 1428.64 | 1459.23                       | 1495.31 | 1515.41                       |
|-------------------------|-------------------------------|-------------------------------|--------|-------------------------------|-------------------------------|-------------------------------|--------------------------------|-------------------------------|---------|---------------------------------|-------------------------------|---------|---------|---------|---------|---------|----------------|---------|-------------------------------|-------------------------------|-----------------|---------|-------------------------------|---------|-------------------------------|
| Frac. Inten. (% of TIC) | 11.19                         | 6.77                          | 1.76   | 1.93                          | 10.55                         | 4.28                          | 2.24                           | 1.63                          | 3.36    | 5.16                            | 3.78                          | 2.16    | 2.62    | 2.02    | 2.16    | 1.90    | 2.90           | 2.36    | 7.21                          | 6.97                          | 4.31            | 7.43    | 1.98                          | 1.64    | 1.71                          |
| Rel. Inten. (% of BP)   | 100.00                        | 60.48                         | 15.69  | 17.20                         | 94.26                         | 38.24                         | 19.98                          | 14.53                         | 30.00   | 46.09                           | 33.75                         | 19.30   | 23.43   | 18.04   | 19.34   | 16.93   | 25.94          | 21.05   | 64.45                         | 62.26                         | 38.47           | 66.38   | 17.69                         | 14.67   | 15.29                         |
| Score                   | 1.00                          | 1.00                          | -0.16  | 1.00                          | 1.00                          | 1.00                          | 1.00                           | 1.00                          | -0.30   | 0.50                            | 1.00                          | -0.19   | -0.23   | -0.18   | -0.19   | -0.17   | 1.00           | -0.21   | 1.00                          | 1.00                          | 1.00            | -0.66   | 1.00                          | -0.15   | 1.00                          |
| Ion-type                | y <sup>++</sup> <sub>12</sub> | y <sup>++</sup> <sub>13</sub> |        | y <sup>++</sup> <sub>14</sub> | y <sup>++</sup> <sub>15</sub> | y <sup>++</sup> <sub>16</sub> | y <sup>+++</sup> <sub>25</sub> | y <sup>++</sup> <sub>17</sub> |         | y <sub>8</sub> -NH <sub>3</sub> | y <sup>++</sup> <sub>18</sub> |         |         |         |         |         | y <sub>9</sub> |         | y <sup>++</sup> <sub>20</sub> | y <sup>++</sup> <sub>22</sub> | b <sub>12</sub> |         | b <sup>++</sup> <sub>26</sub> |         | b <sup>++</sup> <sub>28</sub> |
| Delta Da                | 0.37                          | 0.69                          |        | -0.51                         | 0.34                          | 0.17                          | 0.27                           | 0.52                          |         | -0.57                           | 0.08                          |         |         |         |         |         | 0.14           |         | -0.00                         | 0.01                          | -0.08           |         | 0.61                          |         | 0.25                          |

# Peak 95

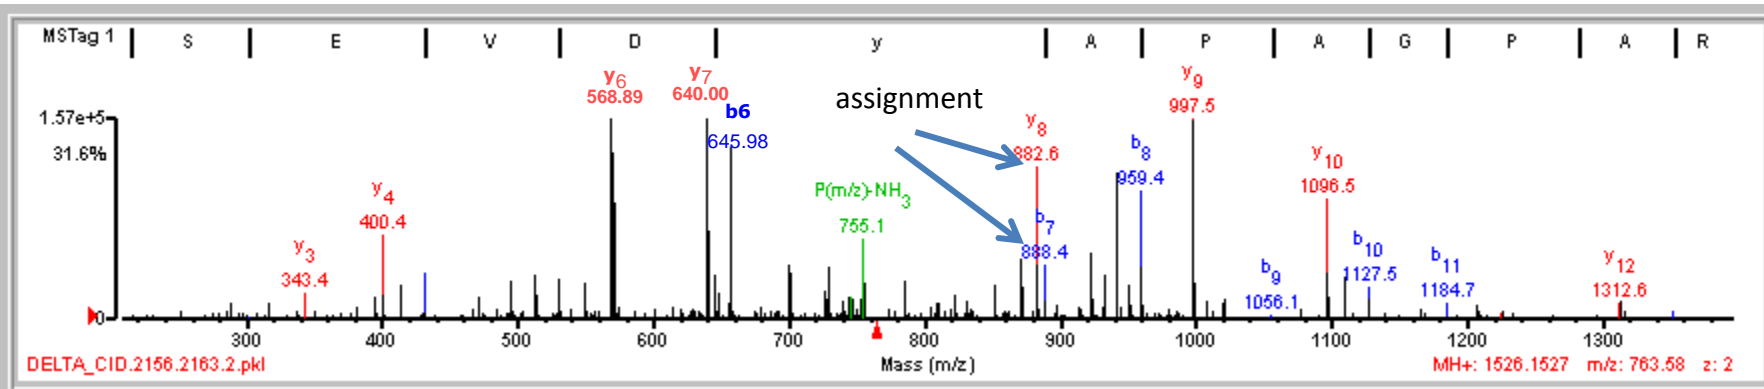

| Rank                    | Score          | SPI (%)        | BCS                              | # Unmatched Ions | Variable sites | Sequence                                        | MH <sup>+</sup> Calculated (Da) | MH <sup>+</sup> Error (Da) | MH <sup>+</sup> Error (ppm) | Protein MW/pI (Da) | Species      | Accession #             | MS-Digest Index #                | Protein Name                              |                |        |                                  |                |                |                 |                                   |                 |
|-------------------------|----------------|----------------|----------------------------------|------------------|----------------|-------------------------------------------------|---------------------------------|----------------------------|-----------------------------|--------------------|--------------|-------------------------|----------------------------------|-------------------------------------------|----------------|--------|----------------------------------|----------------|----------------|-----------------|-----------------------------------|-----------------|
| 1                       | 13.19          | 83.3           | 6                                | 6/22             | Y1135y         | (K) T L S E   V   D   y   A   P A   G P A R (S) | 1446.72                         | 79.4304                    | -351.2                      | 138585.5/6.11      | Homo sapiens | <a href="#">4755142</a> | <a href="#">14485</a>            | inositol polyphosphate phosphatase-like 1 |                |        |                                  |                |                |                 |                                   |                 |
| Fragment-ion (m/z)      | 400.45         | 431.56         | 512.65                           | 530.76           | 568.89         | 571.84                                          | 640.00                          | 645.98                     | 657.74                      | 700.83             | 727.30       | 730.05                  | 870.52                           | 882.56                                    | 888.44         | 923.47 | 941.42                           | 959.37         | 997.47         | 1096.50         | 1109.44                           | 1127.47         |
| Frac. Inten. (% of TIC) | 3.02           | 1.48           | 1.59                             | 1.43             | 20.76          | 3.72                                            | 8.80                            | 1.44                       | 4.66                        | 2.82               | 1.64         | 1.55                    | 2.20                             | 5.60                                      | 2.09           | 2.33   | 5.54                             | 5.00           | 15.95          | 5.46            | 1.50                              | 1.41            |
| Rel. Inten. (% of BP)   | 14.53          | 7.12           | 7.65                             | 6.89             | 100.00         | 17.90                                           | 42.40                           | 6.96                       | 22.43                       | 13.60              | 7.91         | 7.48                    | 10.60                            | 26.98                                     | 10.08          | 11.22  | 26.67                            | 24.11          | 76.85          | 26.31           | 7.24                              | 6.79            |
| Score                   | 1.00           | 1.00           | 0.50                             | 1.00             | 1.00           | -0.18                                           | 1.00                            | 1.00                       | -0.22                       | -0.14              | -0.08        | -0.07                   | 0.50                             | 1.00                                      | 1.00           | -0.11  | 0.50                             | 1.00           | 1.00           | 1.00            | 0.50                              | 1.00            |
| Ion-type                | y <sub>4</sub> | b <sub>4</sub> | b <sub>5</sub> -H <sub>2</sub> O | b <sub>5</sub>   | y <sub>6</sub> |                                                 | y <sub>7</sub>                  | b <sub>6</sub>             |                             |                    |              |                         | b <sub>7</sub> -H <sub>2</sub> O | y <sub>8</sub>                            | b <sub>7</sub> |        | b <sub>8</sub> -H <sub>2</sub> O | b <sub>8</sub> | y <sub>9</sub> | y <sub>10</sub> | b <sub>10</sub> -H <sub>2</sub> O | b <sub>10</sub> |
| Delta Da                | 0.22           | 0.35           | 0.38                             | 0.48             | 0.57           |                                                 | 0.64                            | 0.67                       |                             |                    |              |                         | 0.19                             | 0.17                                      | 0.10           |        | 0.05                             | -0.01          | 0.06           | 0.02            | -0.02                             | 0.00            |

# Peak 96

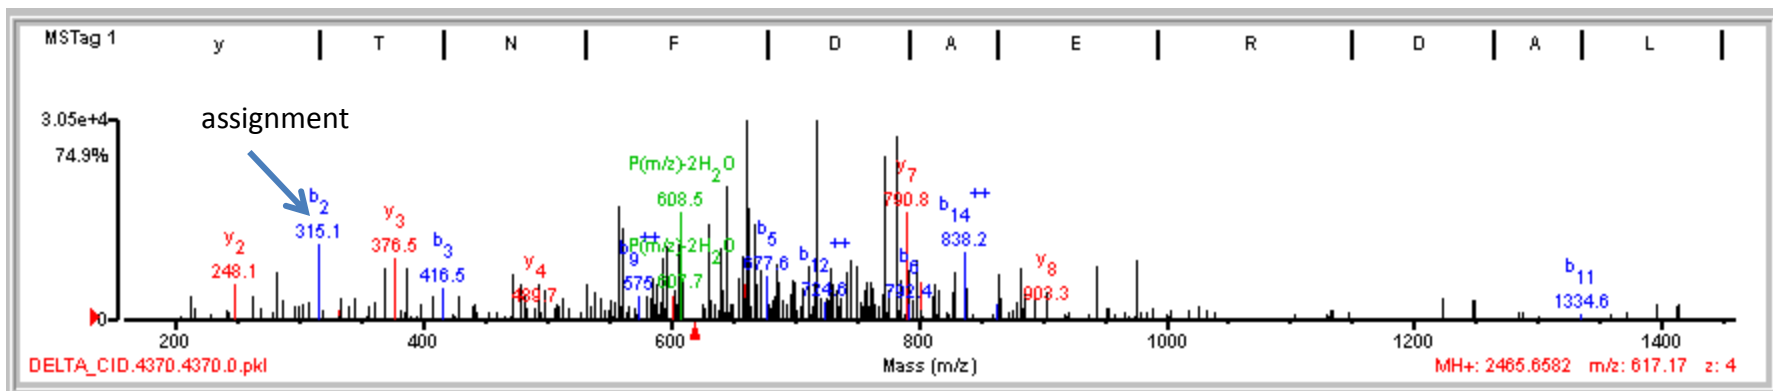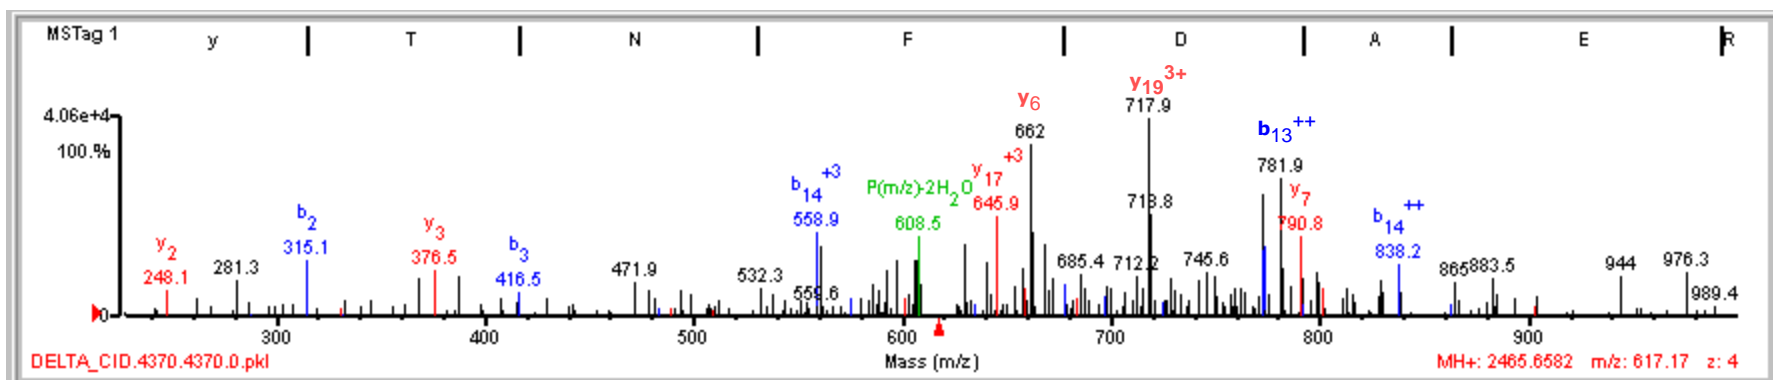

| Rank | Score | SPI (%) | BCS | # Unmatched Ions | Variable sites | Sequence                                              | MH <sup>+</sup> Calculated (Da) | MH <sup>+</sup> Error (Da) | MH <sup>+</sup> Error (ppm) | Protein MW/pl (Da) | Species      | Accession #              | MS-Digest Index #     | Protein Name         |
|------|-------|---------|-----|------------------|----------------|-------------------------------------------------------|---------------------------------|----------------------------|-----------------------------|--------------------|--------------|--------------------------|-----------------------|----------------------|
| 1    | 12.85 | 75.2    | 11  | 9/24             | Y30y           | (K) A/Y I T N/E/D/A E R D A L N I I E/T/A I/K T K (G) | 2384.21                         | 81.4489                    | 601.3                       | 38604.2/7.58       | Homo sapiens | <a href="#">4757756</a>  | <a href="#">3802</a>  | annexin A2 isoform 2 |
| 1    | 12.85 | 75.2    | 11  | 9/24             | Y48y           | (K) A/Y I T N/E/D/A E R D A L N I I E/T/A I/K T K (G) | 2384.21                         | 81.4489                    | 601.3                       | 40411.4/8.53       | Homo sapiens | <a href="#">50845388</a> | <a href="#">12086</a> | annexin A2 isoform 1 |
| 1    | 12.85 | 75.2    | 11  | 9/24             | Y30y           | (K) A/Y I T N/E/D/A E R D A L N I I E/T/A I/K T K (G) | 2384.21                         | 81.4489                    | 601.3                       | 38604.2/7.58       | Homo sapiens | <a href="#">50845386</a> | <a href="#">17586</a> | annexin A2 isoform 2 |

| Fragment-ion (m/z)      | 315.11         | 376.50         | 558.86                         | 560.97         | 593.09 | 597.17                         | 606.03 | 630.15 | 640.51 | 645.88                         | 657.71 | 662.00         | 668.33                        | 698.32 | 717.94                         | 750.24 | 772.64                                          | 781.94                        | 790.80         | 798.87                         | 829.67 | 838.15                        | 883.52 | 944.00 |
|-------------------------|----------------|----------------|--------------------------------|----------------|--------|--------------------------------|--------|--------|--------|--------------------------------|--------|----------------|-------------------------------|--------|--------------------------------|--------|-------------------------------------------------|-------------------------------|----------------|--------------------------------|--------|-------------------------------|--------|--------|
| Frac. Inten. (% of TIC) | 2.19           | 1.78           | 3.66                           | 4.66           | 0.06   | 2.14                           | 2.15   | 3.34   | 2.94   | 4.60                           | 4.12   | 10.15          | 4.42                          | 2.94   | 11.51                          | 2.38   | 10.23                                           | 8.79                          | 5.04           | 3.06                           | 2.29   | 2.93                          | 1.87   | 2.75   |
| Rel. Inten. (% of BP)   | 19.04          | 15.51          | 31.85                          | 40.53          | 0.49   | 18.64                          | 18.69  | 28.98  | 25.56  | 39.95                          | 35.77  | 88.19          | 38.42                         | 25.57  | 100.00                         | 20.70  | 88.85                                           | 76.42                         | 43.82          | 26.56                          | 19.86  | 25.44                         | 16.21  | 23.91  |
| Score                   | 1.00           | 1.00           | 1.00                           | 1.00           | 1.50   | 1.00                           | -0.19  | -0.29  | -0.26  | 1.00                           | -0.36  | 1.00           | 1.00                          | -0.26  | 1.00                           | -0.21  | 0.50                                            | 1.00                          | 1.00           | 1.00                           | -0.20  | 1.00                          | -0.16  | -0.24  |
| Ion-type                | b <sub>2</sub> | y <sub>3</sub> | y <sup>+++</sup> <sub>15</sub> | y <sub>5</sub> | sty    | y <sup>+++</sup> <sub>16</sub> |        |        |        | y <sup>+++</sup> <sub>17</sub> |        | y <sub>6</sub> | b <sup>++</sup> <sub>11</sub> |        | y <sup>+++</sup> <sub>19</sub> |        | b <sup>++</sup> <sub>13</sub> -H <sub>2</sub> O | b <sup>++</sup> <sub>13</sub> | y <sub>7</sub> | y <sup>+++</sup> <sub>20</sub> |        | b <sup>++</sup> <sub>14</sub> |        |        |
| Delta Da                | 0.04           | 0.24           | 0.55                           | 0.59           | 0.78   | 0.52                           |        |        |        | 0.20                           |        | 0.58           | 0.57                          |        | 0.57                           |        | 0.33                                            | 0.62                          | 0.33           | 0.49                           |        | 0.29                          |        |        |

# Peak 97

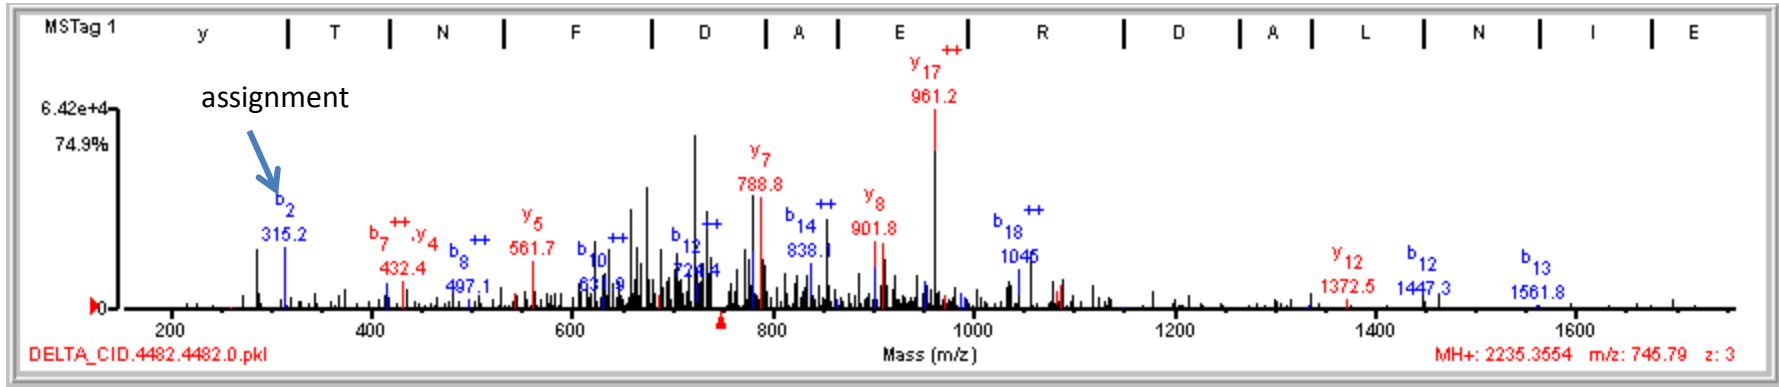

| Rank | Score | SPI (%) | BCS | # Unmatched Ions | Variable sites | Sequence                                     | MH <sup>+</sup> Calculated (Da) | MH <sup>+</sup> Error (Da) | MH <sup>+</sup> Error (ppm) | Protein MW/pI (Da) | Species      | Accession #              | MS-Digest Index #     | Protein Name         |
|------|-------|---------|-----|------------------|----------------|----------------------------------------------|---------------------------------|----------------------------|-----------------------------|--------------------|--------------|--------------------------|-----------------------|----------------------|
| 1    | 14.20 | 82.6    | 12  | 6/22             | Y30y           | (K)A y T/N/F/D A E/R D A/L/N/I E\T\A\I K (T) | 2155.07                         | 80.2889                    | 144.3                       | 38604.2/7.58       | Homo sapiens | <a href="#">4757756</a>  | <a href="#">3802</a>  | annexin A2 isoform 2 |
| 1    | 14.20 | 82.6    | 12  | 6/22             | Y48y           | (K)A y T/N/F/D A E/R D A/L/N/I E\T\A\I K (T) | 2155.07                         | 80.2889                    | 144.3                       | 40411.4/8.53       | Homo sapiens | <a href="#">50845388</a> | <a href="#">12086</a> | annexin A2 isoform 1 |
| 1    | 14.20 | 82.6    | 12  | 6/22             | Y30y           | (K)A y T/N/F/D A E/R D A/L/N/I E\T\A\I K (T) | 2155.07                         | 80.2889                    | 144.3                       | 38604.2/7.58       | Homo sapiens | <a href="#">50845386</a> | <a href="#">17586</a> | annexin A2 isoform 2 |

  

| Fragment-ion (m/z)     | 287.11         | 315.15         | 561.73         | 622.99                        | 636.07                         | 659.67                          | 665.81 | 674.95         | 688.15 | 722.96                        | 729.53 | 735.52 | 738.58 | 773.19 | 780.48                        | 788.85         | 792.86         | 838.13                        | 854.00                        | 901.78                                          | 910.71                        | 961.17                        |
|------------------------|----------------|----------------|----------------|-------------------------------|--------------------------------|---------------------------------|--------|----------------|--------|-------------------------------|--------|--------|--------|--------|-------------------------------|----------------|----------------|-------------------------------|-------------------------------|-------------------------------------------------|-------------------------------|-------------------------------|
| Frac. Inten.(% of TIC) | 2.65           | 2.32           | 2.54           | 3.67                          | 2.53                           | 4.25                            | 2.67   | 5.50           | 4.16   | 8.66                          | 2.55   | 2.35   | 2.93   | 2.75   | 7.75                          | 7.46           | 2.53           | 3.13                          | 3.62                          | 3.84                                            | 5.51                          | 16.61                         |
| Rel. Inten.(% of BP)   | 15.98          | 13.99          | 15.29          | 22.08                         | 15.25                          | 25.61                           | 16.10  | 33.10          | 25.02  | 52.13                         | 15.33  | 14.13  | 17.62  | 16.56  | 46.68                         | 44.89          | 15.21          | 18.85                         | 21.80                         | 23.14                                           | 33.18                         | 100.00                        |
| Score                  | 0.25           | 1.00           | 1.00           | 1.00                          | 1.00                           | 1.00                            | -0.16  | 1.00           | -0.25  | 1.00                          | -0.15  | -0.14  | -0.18  | -0.17  | 1.00                          | 1.00           | 1.00           | 1.00                          | 1.00                          | 1.00                                            | 1.00                          | 1.00                          |
| Ion-type               | a <sub>2</sub> | b <sub>2</sub> | y <sub>5</sub> | y <sup>++</sup> <sub>11</sub> | b <sup>+++</sup> <sub>16</sub> | b <sup>+++</sup> <sub>17</sub>  |        | y <sub>8</sub> |        | y <sup>++</sup> <sub>13</sub> |        |        |        |        | y <sup>++</sup> <sub>14</sub> | y <sub>7</sub> | b <sub>8</sub> | b <sup>++</sup> <sub>14</sub> | y <sup>++</sup> <sub>15</sub> | b <sup>++</sup> <sub>15</sub>                   | y <sup>++</sup> <sub>16</sub> | y <sup>++</sup> <sub>17</sub> |
| Delta Da               | 0.03           | 0.08           | 0.41           | 0.64                          | 0.46                           | 0.38                            |        | 0.54           |        | 0.57                          |        |        |        |        | 0.57                          | 0.40           | 0.60           | 0.27                          | 0.56                          | -0.60                                           | 0.25                          | 0.18                          |
|                        |                |                |                |                               |                                | b <sub>E</sub> -NH <sub>3</sub> |        |                |        |                               |        |        |        |        |                               |                |                |                               |                               | y <sup>++</sup> <sub>16</sub> -H <sub>2</sub> O |                               |                               |
|                        |                |                |                |                               |                                | -0.54                           |        |                |        |                               |        |        |        |        |                               |                |                |                               |                               | 0.32                                            |                               |                               |

# Peak 98

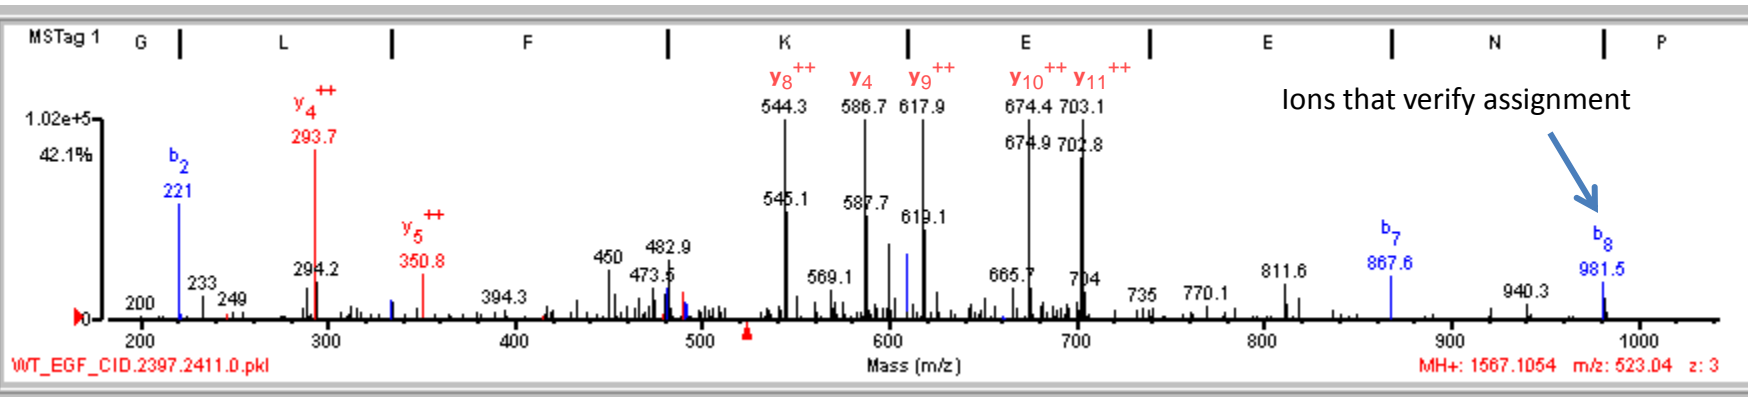

| Rank                    | Score          | SPI (%) | BCS                          | # Unmatched Ions | Variable sites               | Sequence                                  | MH* Calculated (Da) | MH* Error (Da) | MH* Error (ppm) | Protein MW/pi (Da) | Species                      | Accession # | MS-Digest Index #               | Protein Name                                                              |        |                |                              |        |                               |        |                               |                               |                                 |                |                |
|-------------------------|----------------|---------|------------------------------|------------------|------------------------------|-------------------------------------------|---------------------|----------------|-----------------|--------------------|------------------------------|-------------|---------------------------------|---------------------------------------------------------------------------|--------|----------------|------------------------------|--------|-------------------------------|--------|-------------------------------|-------------------------------|---------------------------------|----------------|----------------|
| 1                       | 16.51          | 90.2    | 8                            | 7/25             | Y174y                        | (K) Y/G L I F K V E E I N I P / Y A R (F) | 1486.73             | 80.3729        | 259.5           | 20323.9/9.14       | Homo sapiens                 | 4757886     | 33123                           | pituitary tumor-transforming gene 1 protein-interacting protein precursor |        |                |                              |        |                               |        |                               |                               |                                 |                |                |
| Fragment-ion (m/z)      | 221.05         | 289.09  | 293.68                       | 334.22           | 350.79                       | 450.05                                    | 473.47              | 480.51         | 482.90          | 489.49             | 544.32                       | 559.86      | 569.09                          | 586.74                                                                    | 600.08 | 609.16         | 617.89                       | 643.08 | 674.41                        | 694.44 | 702.77                        | 703.09                        | 811.59                          | 867.57         | 981.49         |
| Frac. Inten. (% of TIC) | 3.09           | 0.98    | 5.23                         | 0.94             | 1.25                         | 2.00                                      | 1.66                | 1.49           | 2.16            | 1.64               | 9.02                         | 0.95        | 1.49                            | 9.62                                                                      | 2.13   | 1.95           | 20.11                        | 1.01   | 14.21                         | 0.95   | 4.00                          | 9.69                          | 1.38                            | 1.31           | 1.72           |
| Rel. Inten. (% of BP)   | 15.38          | 4.87    | 25.99                        | 4.69             | 6.21                         | 9.92                                      | 8.24                | 7.40           | 10.72           | 8.17               | 44.87                        | 4.73        | 7.41                            | 47.83                                                                     | 10.61  | 9.71           | 100.00                       | 5.04   | 70.65                         | 4.73   | 19.89                         | 48.20                         | 6.87                            | 6.53           | 8.55           |
| Score                   | 1.00           | -0.05   | 1.00                         | 1.00             | 1.00                         | 1.00                                      | -0.08               | 1.00           | -0.11           | 1.00               | 1.00                         | -0.05       | 0.50                            | 1.00                                                                      | -0.11  | 1.00           | 1.00                         | -0.05  | 1.00                          | -0.05  | 1.00                          | 1.00                          | 0.50                            | 1.00           | 1.00           |
| Ion-type                | b <sub>2</sub> |         | y <sup>++</sup> <sub>4</sub> | b <sub>3</sub>   | y <sup>++</sup> <sub>5</sub> | y <sup>+++</sup> <sub>10</sub>            |                     | b <sub>4</sub> |                 | y <sub>3</sub>     | y <sup>++</sup> <sub>8</sub> |             | y <sub>4</sub> -NH <sub>3</sub> | y <sub>4</sub>                                                            |        | b <sub>5</sub> | y <sup>++</sup> <sub>9</sub> |        | y <sup>++</sup> <sub>10</sub> |        | y <sup>++</sup> <sub>11</sub> | y <sup>++</sup> <sub>11</sub> | y <sub>6</sub> -NH <sub>3</sub> | b <sub>7</sub> | b <sub>8</sub> |
| Delta Da                | -0.04          |         | 0.06                         | 0.04             | 0.15                         | 0.51                                      |                     | -0.73          |                 | 0.30               | 0.59                         |             | -0.12                           | 0.50                                                                      |        | -0.18          | 0.62                         |        | 0.60                          |        | 0.45                          | 0.77                          | -0.71                           | 0.15           | 0.02           |



# Peak 99

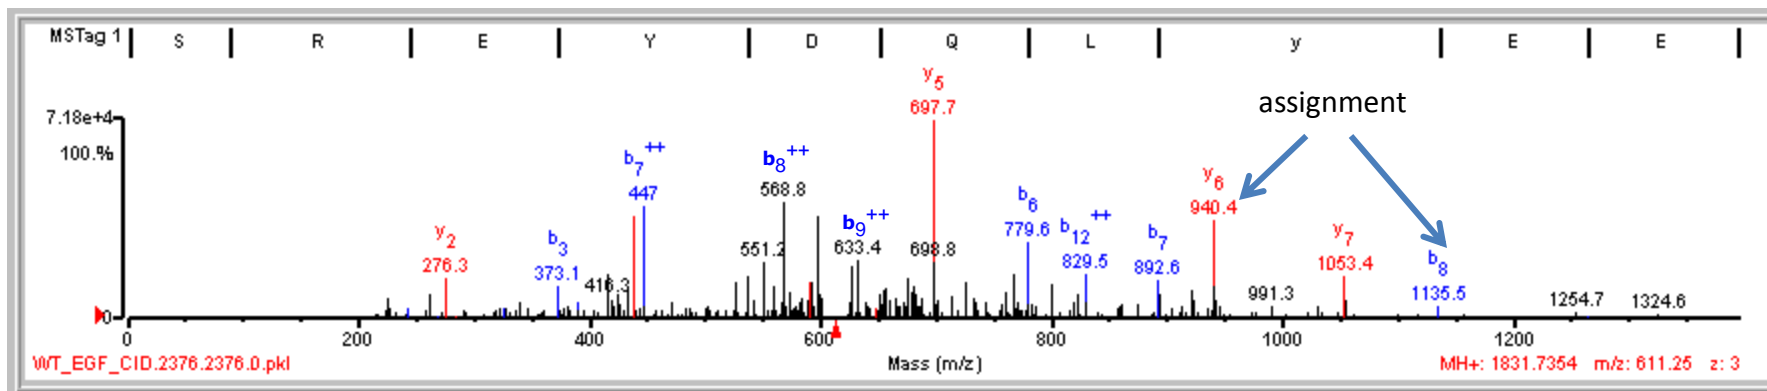

| Rank                    | Score  | SPI (%)                           | BCS            | # Unmatched Ions                  | Variable sites | Sequence                                    | MH <sup>+</sup> Calculated (Da) | MH <sup>+</sup> Error (Da)        | MH <sup>+</sup> Error (ppm)       | Protein MW/pl (Da) | Species      | Accession #             | MS-Digest Index #     | Protein Name                                           |        |                                 |                                   |        |                |        |                                   |                |                                  |                |                |
|-------------------------|--------|-----------------------------------|----------------|-----------------------------------|----------------|---------------------------------------------|---------------------------------|-----------------------------------|-----------------------------------|--------------------|--------------|-------------------------|-----------------------|--------------------------------------------------------|--------|---------------------------------|-----------------------------------|--------|----------------|--------|-----------------------------------|----------------|----------------------------------|----------------|----------------|
| 1                       | 12.57  | 76.0                              | 7              | 8/25                              | Y464y          | (K) S R E Y \ D Q   L   Y   E   Y T \ R (T) | 1751.79                         | 79.9483                           | -9.8                              | 81624.8/6.10       | Homo sapiens | <a href="#">4826908</a> | <a href="#">37653</a> | phosphoinositide-3-kinase, regulatory subunit 2 (beta) |        |                                 |                                   |        |                |        |                                   |                |                                  |                |                |
| Fragment-ion (m/z)      | 415.73 | 438.17                            | 439.52         | 446.99                            | 527.80         | 536.76                                      | 551.21                          | 559.49                            | 568.85                            | 583.36             | 593.36       | 597.56                  | 627.74                | 633.38                                                 | 654.88 | 679.79                          | 697.72                            | 768.48 | 779.57         | 800.36 | 829.53                            | 892.63         | 922.25                           | 940.38         | 1053.43        |
| Frac. Inten. (% of TIC) | 3.03   | 3.01                              | 5.23           | 5.84                              | 1.96           | 2.41                                        | 3.78                            | 3.29                              | 7.65                              | 2.07               | 2.58         | 4.69                    | 2.44                  | 3.10                                                   | 2.69   | 2.73                            | 12.48                             | 3.28   | 4.55           | 3.26   | 3.07                              | 3.60           | 2.40                             | 7.51           | 3.35           |
| Rel. Inten. (% of BP)   | 24.31  | 24.13                             | 41.86          | 46.80                             | 15.70          | 19.28                                       | 30.25                           | 26.33                             | 61.26                             | 16.56              | 20.68        | 37.54                   | 19.52                 | 24.87                                                  | 21.53  | 21.90                           | 100.00                            | 26.31  | 36.47          | 26.13  | 24.59                             | 28.85          | 19.23                            | 60.17          | 26.81          |
| Score                   | -0.24  | 0.50                              | 1.00           | 1.00                              | 1.00           | 1.00                                        | 0.50                            | 0.50                              | 1.00                              | -0.17              | -0.21        | -0.38                   | -0.20                 | 1.00                                                   | -0.22  | 0.50                            | 1.00                              | -0.26  | 1.00           | -0.26  | 1.00                              | 1.00           | 0.50                             | 1.00           | 1.00           |
| Ion-type                |        | b <sup>++</sup> -H <sub>2</sub> O | y <sub>3</sub> | b <sup>++</sup> -H <sub>2</sub> O | y <sub>3</sub> | b <sub>4</sub>                              | y <sub>4</sub> -NH <sub>3</sub> | b <sup>++</sup> -H <sub>2</sub> O | b <sup>++</sup> -H <sub>2</sub> O |                    |              |                         |                       | b <sup>++</sup> -H <sub>2</sub> O                      |        | y <sub>5</sub> -NH <sub>3</sub> | b <sup>++</sup> -H <sub>2</sub> O |        | b <sub>e</sub> |        | b <sup>++</sup> -H <sub>2</sub> O | b <sub>7</sub> | y <sub>e</sub> -H <sub>2</sub> O | y <sub>e</sub> | y <sub>7</sub> |
| Delta Da                |        | 0.46                              | 0.29           | 0.28                              | 0.58           | 0.51                                        | -0.04                           | 0.27                              | 0.62                              |                    |              |                         |                       | 0.63                                                   |        | -0.50                           | 0.45                              |        | 0.24           |        | 0.21                              | 0.21           | -0.08                            | 0.04           | 0.00           |

# Peak 100

assignment

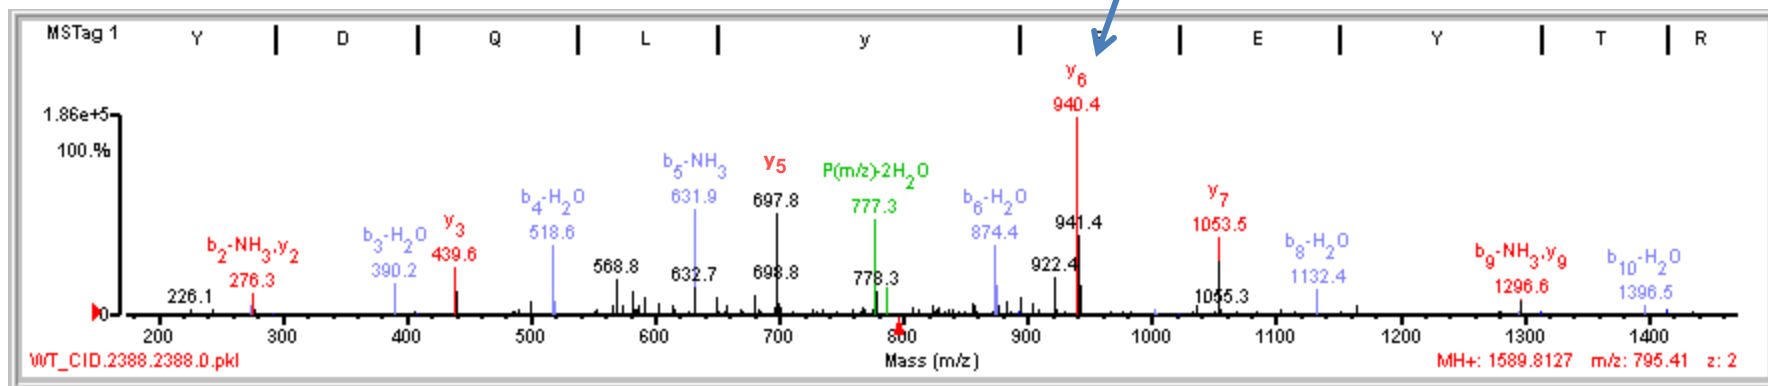

| Rank                    | Score          | SPI (%)                          | BCS            | # Unmatched Ions                | Variable sites | Sequence                         | MH <sup>+</sup> Calculated (Da) | MH <sup>+</sup> Error (Da) | MH <sup>+</sup> Error (ppm)     | Protein MW/pI (Da) | Species                         | Accession #             | MS-Digest Index #     | Protein Name                                           |                                  |        |                                  |                |                                 |                |                                  |                                 |                                 |      |
|-------------------------|----------------|----------------------------------|----------------|---------------------------------|----------------|----------------------------------|---------------------------------|----------------------------|---------------------------------|--------------------|---------------------------------|-------------------------|-----------------------|--------------------------------------------------------|----------------------------------|--------|----------------------------------|----------------|---------------------------------|----------------|----------------------------------|---------------------------------|---------------------------------|------|
| 1                       | 13.67          | 93.3                             | 8              | 4/23                            | Y464y          | (R) E Y/D/Q/L I Y/E/E/Y/T R (T)  | 1508.65                         | 81.1587                    | 750.0                           | 81624.8/6.10       | Homo sapiens                    | <a href="#">4826908</a> | <a href="#">37653</a> | phosphoinositide-3-kinase, regulatory subunit 2 (beta) |                                  |        |                                  |                |                                 |                |                                  |                                 |                                 |      |
| Fragment-ion (m/z)      | 276.26         | 390.25                           | 439.55         | 518.58                          | 568.81         | 582.98                           | 591.95                          | 613.89                     | 631.94                          | 649.49             | 679.93                          | 697.82                  | 768.27                | 857.48                                                 | 874.38                           | 883.80 | 922.36                           | 940.40         | 1035.80                         | 1053.49        | 1132.35                          | 1164.69                         | 1296.63                         |      |
| Frac. Inten. (% of TIC) | 1.99           | 2.56                             | 4.84           | 5.55                            | 3.53           | 2.77                             | 1.76                            | 1.93                       | 8.93                            | 2.76               | 1.69                            | 9.74                    | 1.51                  | 1.55                                                   | 7.28                             | 1.75   | 3.38                             | 20.13          | 1.63                            | 8.85           | 2.16                             | 1.40                            | 2.30                            |      |
| Rel. Inten. (% of BP)   | 9.87           | 12.70                            | 24.06          | 27.55                           | 17.55          | 13.75                            | 8.76                            | 9.59                       | 44.36                           | 13.72              | 8.39                            | 48.37                   | 7.50                  | 7.68                                                   | 36.17                            | 8.67   | 16.81                            | 100.00         | 8.12                            | 43.96          | 10.72                            | 6.98                            | 11.43                           |      |
| Score                   | 1.00           | 0.50                             | 1.00           | 0.50                            | 1.00           | 0.50                             | 1.00                            | -0.10                      | 0.50                            | 1.00               | 0.50                            | 1.00                    | -0.07                 | -0.08                                                  | 0.50                             | -0.09  | 0.50                             | 1.00           | 0.50                            | 1.00           | 0.50                             | 0.50                            | 1.00                            |      |
| Ion-type                | y <sub>2</sub> | b <sub>3</sub> -H <sub>2</sub> O | y <sub>3</sub> | b <sub>4</sub> -NH <sub>3</sub> | y <sub>4</sub> | y <sub>4</sub> +H <sub>2</sub> O | y <sub>4</sub> +                |                            | b <sub>5</sub> -NH <sub>3</sub> | b <sub>5</sub>     | y <sub>5</sub> -NH <sub>3</sub> | y <sub>5</sub>          |                       |                                                        | b <sub>6</sub> -H <sub>2</sub> O |        | y <sub>6</sub> -H <sub>2</sub> O | y <sub>6</sub> | y <sub>7</sub> -NH <sub>3</sub> | y <sub>7</sub> | b <sub>8</sub> -H <sub>2</sub> O | y <sub>8</sub> -NH <sub>3</sub> | b <sub>9</sub> -NH <sub>3</sub> |      |
| Delta Da                | 0.09           | 0.12                             | 0.32           | -0.59                           | 0.54           | 0.74                             | 0.70                            |                            | -0.32                           | 0.21               | -0.36                           | 0.50                    |                       |                                                        | 0.08                             |        | 0.03                             | 0.06           | -0.60                           | 0.06           | -0.04                            | 0.23                            | 0.20                            |      |
|                         |                |                                  |                |                                 |                |                                  |                                 |                            |                                 | y <sub>9</sub> +   |                                 |                         |                       |                                                        |                                  |        |                                  |                |                                 |                |                                  |                                 | y <sub>9</sub>                  | 0.12 |

# Peak 101

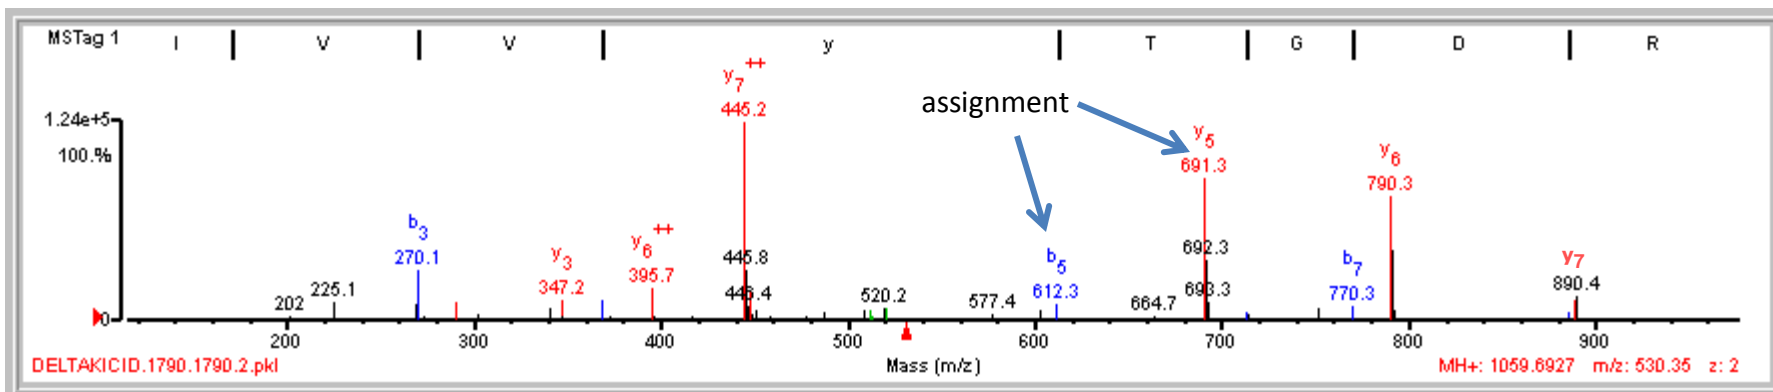

| Rank | Score | SPI (%) | BCS | # Unmatched Ions | Variable sites | Sequence                  | MH <sup>+</sup> Calculated (Da) | MH <sup>+</sup> Error (Da) | MH <sup>+</sup> Error (ppm) | Protein MW/pI (Da) | Species      | Accession #              | MS-Digest Index #     | Protein Name                                        |
|------|-------|---------|-----|------------------|----------------|---------------------------|---------------------------------|----------------------------|-----------------------------|--------------------|--------------|--------------------------|-----------------------|-----------------------------------------------------|
| 1    | 13.93 | 98.3    | 6   | 1/15             | Y260y          | (R) G I/V V Y T G D R (T) | 979.52                          | 80.1720                    | 194.1                       | 74167.3/5.73       | Homo sapiens | <a href="#">48762682</a> | <a href="#">27732</a> | Na+/K+ -ATPase alpha 1 subunit isoform b proprotein |
| 1    | 13.93 | 98.3    | 6   | 1/15             | Y260y          | (R) G I/V V Y T G D R (T) | 979.52                          | 80.1720                    | 194.1                       | 112896.8/5.33      | Homo sapiens | <a href="#">21361181</a> | <a href="#">30493</a> | Na+/K+ -ATPase alpha 1 subunit isoform a proprotein |

  

| Fragment-ion (m/z)      | 225.06           | 269.15 | 270.06         | 290.15         | 347.23         | 369.11         | 395.70           | 445.24           | 448.30         | 612.31         | 691.33         | 713.46         | 770.31         | 790.33         | 889.31         |
|-------------------------|------------------|--------|----------------|----------------|----------------|----------------|------------------|------------------|----------------|----------------|----------------|----------------|----------------|----------------|----------------|
| Frac. Inten. (% of TIC) | 1.99             | 1.68   | 4.99           | 1.78           | 2.48           | 2.56           | 3.68             | 25.48            | 3.60           | 2.14           | 21.46          | 1.64           | 1.78           | 20.05          | 4.70           |
| Rel. Inten. (% of BP)   | 7.79             | 6.59   | 19.58          | 6.98           | 9.72           | 10.05          | 14.43            | 100.00           | 14.12          | 8.38           | 84.21          | 6.45           | 6.99           | 78.67          | 18.46          |
| Score                   | 1.00             | -0.07  | 1.00           | 1.00           | 1.00           | 1.00           | 1.00             | 1.00             | 1.00           | 1.00           | 1.00           | 1.00           | 1.00           | 1.00           | 1.00           |
| Ion-type                | y <sup>++4</sup> |        | b <sub>3</sub> | y <sub>2</sub> | y <sub>3</sub> | b <sub>4</sub> | y <sup>++6</sup> | y <sup>++7</sup> | y <sub>4</sub> | b <sub>5</sub> | y <sub>5</sub> | b <sub>6</sub> | b <sub>7</sub> | y <sub>6</sub> | y <sub>7</sub> |
| Delta Da                | 0.45             |        | -0.12          | 0.00           | 0.06           | -0.14          | 0.04             | 0.05             | 0.08           | 0.03           | 0.09           | 0.13           | -0.04          | 0.02           | -0.07          |





# Peak 104

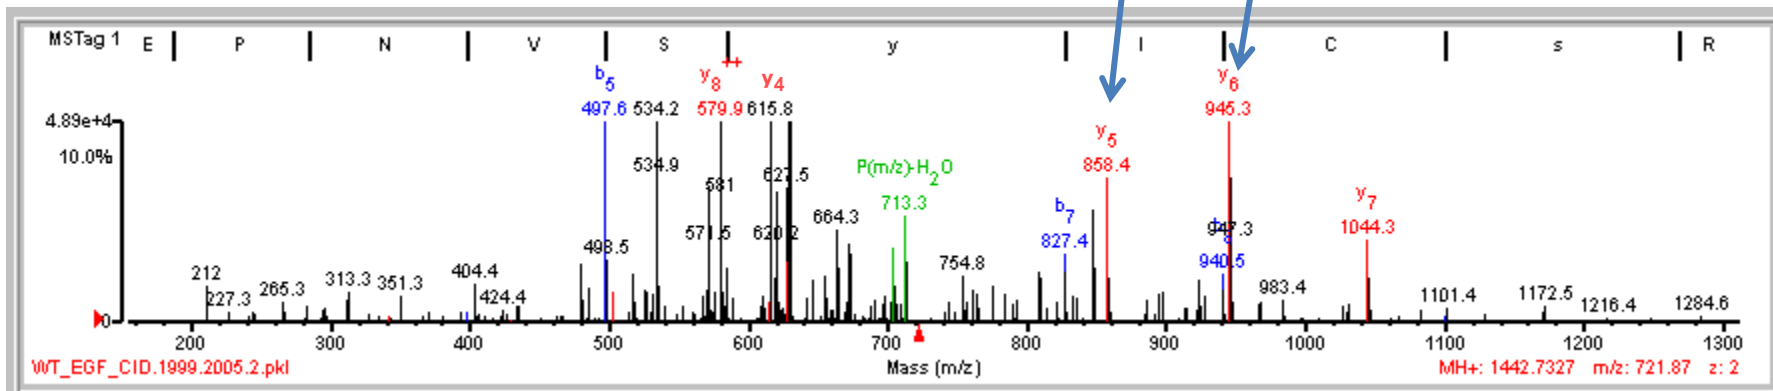

| Rank | Score | SPI (%) | BCS | # Unmatched Ions | Variable sites | Sequence                      | MH <sup>+</sup> Calculated (Da) | MH <sup>+</sup> Error (Da) | MH <sup>+</sup> Error (ppm) | Protein MW/pI (Da) | Species      | Accession #              | MS-Digest Index #     | Protein Name                     |
|------|-------|---------|-----|------------------|----------------|-------------------------------|---------------------------------|----------------------------|-----------------------------|--------------------|--------------|--------------------------|-----------------------|----------------------------------|
| 1    | 14.88 | 86.8    | 7   | 5/25             | Y279y S282s    | (R) G E/P/N/V S Y I\C s R (Y) | 1281.59                         | 161.1435                   | 839.3                       | 50981.1/8.95       | Homo sapiens | <a href="#">49574532</a> | <a href="#">5729</a>  | glycogen synthase kinase 3 alpha |
| 1    | 14.88 | 86.8    | 7   | 5/25             | Y216y S219s    | (R) G E/P/N/V S Y I\C s R (Y) | 1281.59                         | 161.1435                   | 839.3                       | 48033.9/8.98       | Homo sapiens | <a href="#">21361340</a> | <a href="#">32226</a> | glycogen synthase kinase 3 beta  |

  

| Fragment-ion (m/z)      | 480.55                          | 497.65         | 517.63                                         | 534.19 | 571.14                                         | 579.86                       | 584.90         | 610.53 | 615.78         | 620.24 | 627.50                       | 628.97                       | 641.70 | 655.28 | 664.30 | 672.86 | 754.85 | 809.45                           | 827.35         | 847.45                                         | 858.37         | 923.51                          | 940.54         | 945.28         | 1044.29        |
|-------------------------|---------------------------------|----------------|------------------------------------------------|--------|------------------------------------------------|------------------------------|----------------|--------|----------------|--------|------------------------------|------------------------------|--------|--------|--------|--------|--------|----------------------------------|----------------|------------------------------------------------|----------------|---------------------------------|----------------|----------------|----------------|
| Frac. Inten. (% of TIC) | 0.96                            | 4.24           | 0.95                                           | 8.02   | 2.49                                           | 15.55                        | 0.75           | 0.73   | 4.29           | 2.63   | 2.26                         | 36.09                        | 0.82   | 0.05   | 0.07   | 0.07   | 0.97   | 1.09                             | 1.55           | 1.95                                           | 2.31           | 0.71                            | 1.05           | 8.50           | 1.89           |
| Rel. Inten. (% of BP)   | 2.67                            | 11.76          | 2.63                                           | 22.23  | 6.89                                           | 43.09                        | 2.09           | 2.04   | 11.89          | 7.29   | 6.27                         | 100.00                       | 2.27   | 0.13   | 0.19   | 0.21   | 2.69   | 3.03                             | 4.28           | 5.40                                           | 6.40           | 1.97                            | 2.90           | 23.56          | 5.25           |
| Score                   | 0.50                            | 1.00           | 0.25                                           | -0.22  | 0.50                                           | 1.00                         | 1.00           | -0.02  | 1.00           | -0.07  | 1.00                         | 1.00                         | -0.02  |        | 0.25   | 1.50   | -0.03  | 0.50                             | 1.00           | 0.25                                           | 1.00           | 0.50                            | 1.00           | 1.00           | 1.00           |
| Ion-type                | b <sub>5</sub> -NH <sub>3</sub> | b <sub>5</sub> | y <sub>4</sub> -H <sub>3</sub> PO <sub>4</sub> |        | y <sup>++</sup> <sub>8</sub> -H <sub>2</sub> O | y <sup>++</sup> <sub>8</sub> | b <sub>6</sub> |        | y <sub>4</sub> |        | y <sup>++</sup> <sub>9</sub> | y <sup>++</sup> <sub>9</sub> |        | st     | st     | sty    |        | b <sub>7</sub> -H <sub>2</sub> O | b <sub>7</sub> | y <sub>6</sub> -H <sub>3</sub> PO <sub>4</sub> | y <sub>5</sub> | b <sub>8</sub> -NH <sub>3</sub> | b <sub>8</sub> | y <sub>6</sub> | y <sub>7</sub> |
| Delta Da                | 0.34                            | 0.41           | 0.37                                           |        | 0.44                                           | 0.15                         | 0.63           |        | 0.55           |        | -0.73                        | 0.74                         |        |        | 1.03   | 0.58   |        | 0.16                             | 0.05           | 0.13                                           | 0.11           | 0.16                            | 0.16           | -0.01          | -0.07          |

# Peak 105

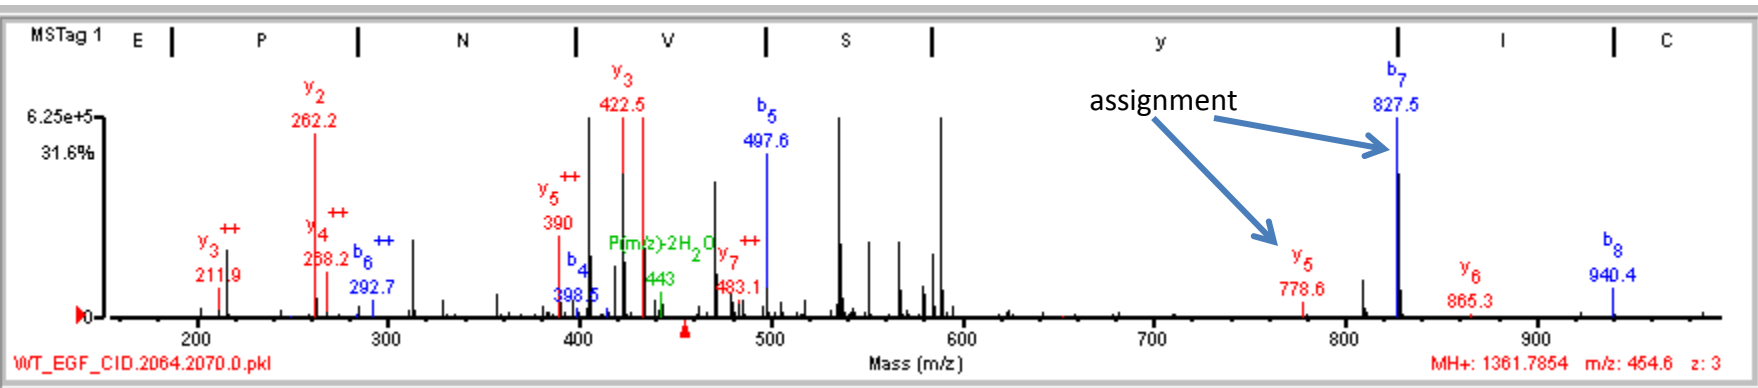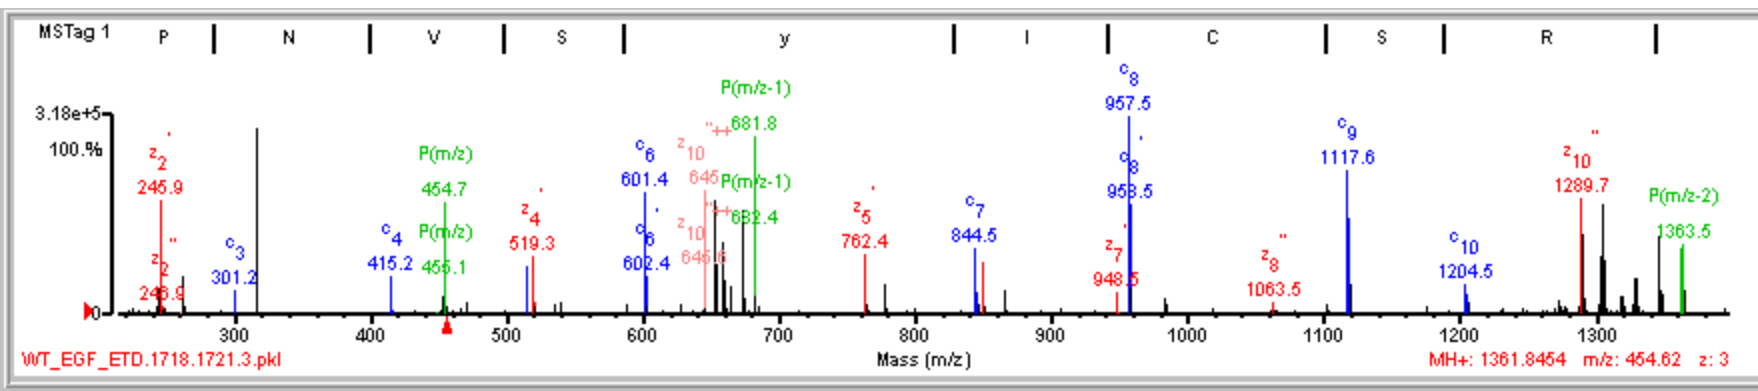

| Rank | Score | SPI (%) | BCS | # Unmatched Ions | Variable sites | Sequence                                  | MH <sup>+</sup> Calculated (Da) | MH <sup>+</sup> Error (Da) | MH <sup>+</sup> Error (ppm) | Protein MW/pl (Da) | Species      | Accession #              | MS-Digest Index #     | Protein Name                     |
|------|-------|---------|-----|------------------|----------------|-------------------------------------------|---------------------------------|----------------------------|-----------------------------|--------------------|--------------|--------------------------|-----------------------|----------------------------------|
| 1    | 19.48 | 92.6    | 7   | 4/25             | Y279y          | (R) G E / P N / V I S   y I I C I S R (Y) | 1281.59                         | 80.1962                    | 168.8                       | 50981.1/8.95       | Homo sapiens | <a href="#">49574532</a> | <a href="#">5729</a>  | glycogen synthase kinase 3 alpha |
| 1    | 19.48 | 92.6    | 7   | 4/25             | Y216y          | (R) G E / P N / V I S   y I I C I S R (Y) | 1281.59                         | 80.1962                    | 168.8                       | 48033.9/8.98       | Homo sapiens | <a href="#">21361340</a> | <a href="#">32226</a> | glycogen synthase kinase 3 beta  |

  

| Fragment-ion (m/z)      | 211.93           | 216.10 | 262.22         | 268.23           | 313.18 | 390.00           | 405.50                          | 418.84 | 422.46         | 433.48           | 471.17           | 479.66                          | 483.10           | 485.58 | 497.65         | 535.77         | 551.28           | 566.74                          | 579.98                             | 584.84         | 588.93           | 778.56         | 809.67                          | 827.49         | 940.39         |
|-------------------------|------------------|--------|----------------|------------------|--------|------------------|---------------------------------|--------|----------------|------------------|------------------|---------------------------------|------------------|--------|----------------|----------------|------------------|---------------------------------|------------------------------------|----------------|------------------|----------------|---------------------------------|----------------|----------------|
| Frac. Inten. (% of TIC) | 1.14             | 2.11   | 5.75           | 1.60             | 2.69   | 2.86             | 8.72                            | 1.81   | 0.71           | 10.03            | 5.47             | 1.44                            | 1.12             | 0.79   | 5.67           | 9.26           | 3.31             | 3.12                            | 2.01                               | 2.17           | 10.29            | 0.78           | 1.65                            | 14.30          | 1.20           |
| Rel. Inten. (% of BP)   | 7.99             | 14.72  | 40.21          | 11.20            | 18.83  | 20.02            | 60.98                           | 12.63  | 4.97           | 70.10            | 38.25            | 10.06                           | 7.80             | 5.53   | 39.61          | 64.73          | 23.15            | 21.81                           | 14.02                              | 15.18          | 71.97            | 5.43           | 11.51                           | 100.00         | 8.40           |
| Score                   | 1.00             | -0.15  | 1.00           | 1.00             | -0.19  | 1.00             | 0.50                            | -0.13  | 1.50           | 1.00             | 1.00             | 0.50                            | 1.00             | -0.06  | 1.00           | 1.00           | 1.00             | 0.50                            | 0.50                               | 1.00           | 1.00             | 1.00           | 0.50                            | 1.00           | 1.00           |
| Ion-type                | y <sup>++3</sup> |        | y <sub>2</sub> | y <sup>++4</sup> |        | y <sup>++5</sup> | y <sub>3</sub> -NH <sub>3</sub> |        | y <sub>3</sub> | y <sup>++6</sup> | b <sup>++8</sup> | b <sub>5</sub> -NH <sub>3</sub> | y <sup>++7</sup> |        | b <sub>5</sub> | y <sub>4</sub> | b <sup>++9</sup> | b <sub>6</sub> -NH <sub>3</sub> | y <sup>++9</sup> -H <sub>2</sub> O | b <sub>6</sub> | y <sup>++9</sup> | y <sub>5</sub> | b <sub>7</sub> -NH <sub>3</sub> | b <sub>7</sub> | b <sub>8</sub> |
| Delta Da                | 0.34             |        | 0.07           | 0.09             |        | 0.35             | 0.34                            |        | 0.28           | 0.31             | 0.48             | -0.55                           | 0.40             |        | 0.41           | 0.50           | 0.57             | -0.50                           | 0.74                               | 0.57           | 0.68             | 0.26           | -0.60                           | 0.19           | 0.01           |

# Peak 106

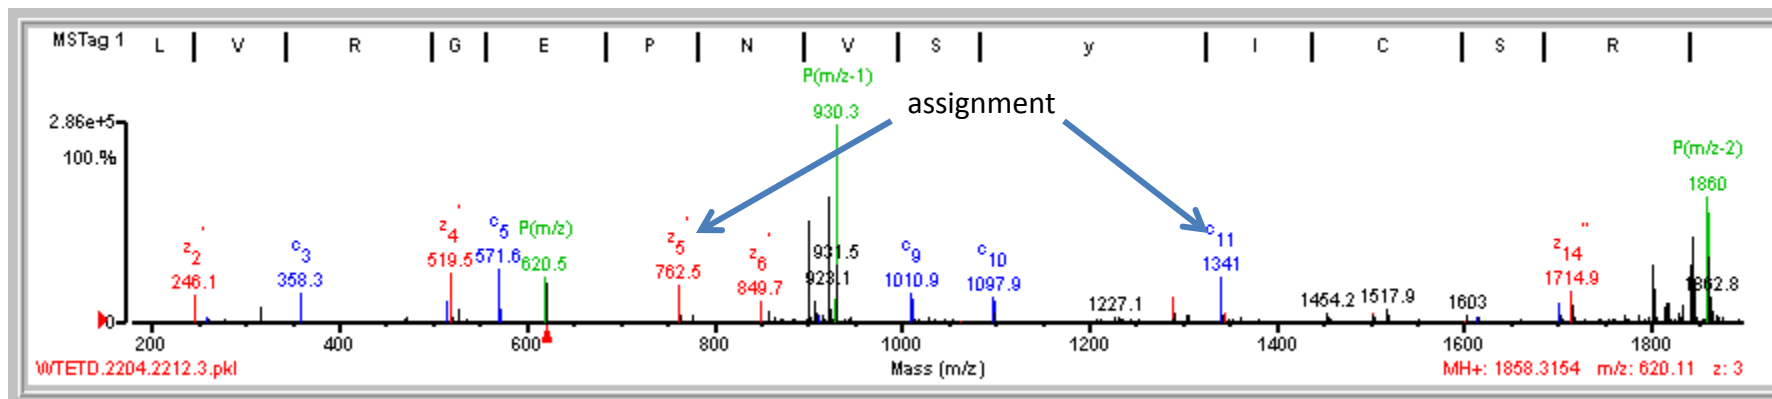

| Rank                    | Score                       | SPI (%)        | BCS            | # Unmatched Ions            | Variable sites | Sequence                              | MH <sup>+</sup> Calculated (Da) | MH <sup>+</sup> Error (Da)  | MH <sup>+</sup> Error (ppm) | Protein MW/pl (Da)          | Species                     | Accession #                 | MS-Digest Index #           | Protein Name                     |                             |                             |                             |                             |                             |                             |                             |                             |                             |                             |                             |
|-------------------------|-----------------------------|----------------|----------------|-----------------------------|----------------|---------------------------------------|---------------------------------|-----------------------------|-----------------------------|-----------------------------|-----------------------------|-----------------------------|-----------------------------|----------------------------------|-----------------------------|-----------------------------|-----------------------------|-----------------------------|-----------------------------|-----------------------------|-----------------------------|-----------------------------|-----------------------------|-----------------------------|-----------------------------|
| 1                       | 16.13                       | 94.0           | 11             | 3/25                        | Y279y          | (K) Q/L/V/R G E P N V S Y I\C S\R (Y) | 1777.90                         | 80.4141                     | 240.9                       | 50981.1/8.95                | Homo sapiens                | <a href="#">49574532</a>    | <a href="#">5729</a>        | glycogen synthase kinase 3 alpha |                             |                             |                             |                             |                             |                             |                             |                             |                             |                             |                             |
| 1                       | 16.13                       | 94.0           | 11             | 3/25                        | Y216y          | (K) Q/L/V/R G E P N V S Y I\C S\R (Y) | 1777.90                         | 80.4141                     | 240.9                       | 48033.9/8.98                | Homo sapiens                | <a href="#">21361340</a>    | <a href="#">32226</a>       | glycogen synthase kinase 3 beta  |                             |                             |                             |                             |                             |                             |                             |                             |                             |                             |                             |
| Fragment-ion (m/z)      | 246.06                      | 316.23         | 358.32         | 514.65                      | 519.52         | 527.71                                | 571.62                          | 762.54                      | 849.67                      | 857.74                      | 1010.89                     | 1097.93                     | 1289.09                     | 1305.04                          | 1341.05                     | 1346.17                     | 1454.19                     | 1502.94                     | 1517.87                     | 1615.25                     | 1616.98                     | 1701.16                     | 1701.95                     | 1714.94                     | 1743.90                     |
| Frac. Inten. (% of TIC) | 3.67                        | 2.32           | 3.73           | 3.13                        | 7.22           | 1.90                                  | 6.88                            | 5.61                        | 3.30                        | 2.26                        | 6.14                        | 5.26                        | 6.15                        | 2.53                             | 9.60                        | 1.88                        | 2.14                        | 3.11                        | 3.04                        | 1.69                        | 1.92                        | 1.91                        | 3.83                        | 9.04                        | 1.74                        |
| Rel. Inten. (% of BP)   | 38.19                       | 24.22          | 38.81          | 32.62                       | 75.24          | 19.83                                 | 71.70                           | 58.49                       | 34.42                       | 23.51                       | 63.97                       | 54.79                       | 64.10                       | 26.40                            | 100.00                      | 19.56                       | 22.25                       | 32.35                       | 31.65                       | 17.65                       | 19.96                       | 19.90                       | 39.85                       | 94.15                       | 18.09                       |
| Score                   | 1.00                        | -0.24          | 1.00           | 1.00                        | 1.00           | -0.20                                 | 1.00                            | 1.00                        | 1.00                        | 1.00                        | 1.00                        | 1.00                        | 1.00                        | 0.25                             | 1.00                        | 1.00                        | 1.00                        | 0.25                        | 0.25                        | 0.25                        | 0.25                        | 1.00                        | 0.25                        | 0.25                        | -0.18                       |
| Ion-type                | z <sub>2</sub> <sup>+</sup> | c <sub>3</sub> | c <sub>4</sub> | z <sub>4</sub> <sup>+</sup> | c <sub>5</sub> | z <sub>5</sub> <sup>+</sup>           | z <sub>6</sub> <sup>+</sup>     | z <sub>6</sub> <sup>+</sup> | z <sub>6</sub> <sup>+</sup> | z <sub>6</sub> <sup>+</sup> | z <sub>6</sub> <sup>+</sup> | z <sub>6</sub> <sup>+</sup> | z <sub>6</sub> <sup>+</sup> | z <sub>6</sub> <sup>+</sup>      | z <sub>6</sub> <sup>+</sup> | z <sub>6</sub> <sup>+</sup> | z <sub>6</sub> <sup>+</sup> | z <sub>6</sub> <sup>+</sup> | z <sub>6</sub> <sup>+</sup> | z <sub>6</sub> <sup>+</sup> | z <sub>6</sub> <sup>+</sup> | z <sub>6</sub> <sup>+</sup> | z <sub>6</sub> <sup>+</sup> | z <sub>6</sub> <sup>+</sup> | z <sub>6</sub> <sup>+</sup> |
| Delta Da                | -0.07                       |                | 0.08           | 0.30                        | 0.27           |                                       | 0.25                            | 0.26                        | 0.36                        | 0.34                        | 0.32                        | 0.32                        | 0.57                        | 0.51                             | 0.41                        | 0.63                        | 0.47                        | 0.29                        | 0.21                        | 0.49                        | 0.25                        | 0.38                        | 0.16                        | 0.14                        |                             |





# Peak 108

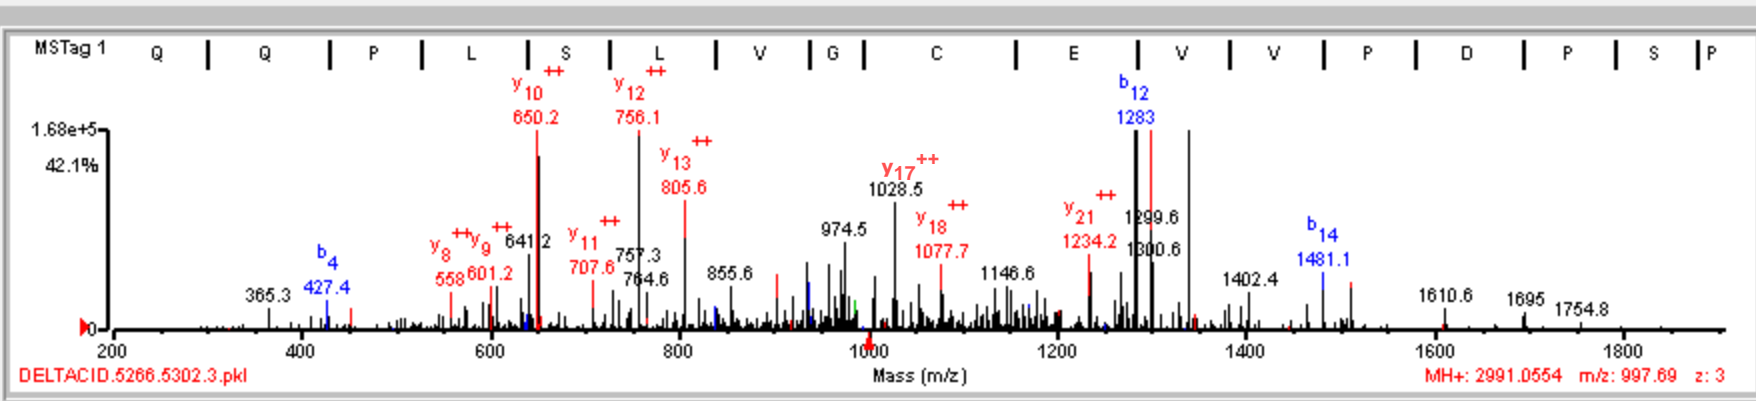

| Rank                    | Score  | SPI (%)                                         | BCS                           | # Unmatched Ions                | Variable sites                | Sequence                                                        | MH <sup>+</sup> Calculated (Da) | MH <sup>+</sup> Error (Da) | MH <sup>+</sup> Error (ppm) | Protein MW/pl (Da) | Species      | Accession #                   | MS-Digest Index #     | Protein Name                  |                               |                               |         |                                                 |                 |                               |                               |         |         |                 |                 |
|-------------------------|--------|-------------------------------------------------|-------------------------------|---------------------------------|-------------------------------|-----------------------------------------------------------------|---------------------------------|----------------------------|-----------------------------|--------------------|--------------|-------------------------------|-----------------------|-------------------------------|-------------------------------|-------------------------------|---------|-------------------------------------------------|-----------------|-------------------------------|-------------------------------|---------|---------|-----------------|-----------------|
| 1                       | 15.30  | 78.2                                            | 10                            | 8/25                            | Y413y                         | (K) V A Q Q/E/L/S L/V/G C E I/V/V I P/D/P S P D/H L Y S F R (I) | 2910.45                         | 80.6100                    | 215.2                       | 91300.1/5.21       | Homo sapiens | <a href="#">50897850</a>      | <a href="#">16304</a> | KIAA1914 protein isoform 1    |                               |                               |         |                                                 |                 |                               |                               |         |         |                 |                 |
| Fragment-ion (m/z)      | 606.35 | 641.18                                          | 650.17                        | 707.62                          | 756.14                        | 805.59                                                          | 855.55                          | 902.68                     | 935.40                      | 974.46             | 1006.50      | 1028.50                       | 1054.68               | 1077.72                       | 1177.98                       | 1234.19                       | 1267.74 | 1273.98                                         | 1283.04         | 1283.31                       | 1298.72                       | 1338.69 | 1402.37 | 1481.09         | 1510.77         |
| Frac. Inten. (% of TIC) | 1.67   | 1.84                                            | 9.93                          | 1.59                            | 9.03                          | 4.15                                                            | 1.73                            | 1.56                       | 3.84                        | 2.57               | 1.75         | 4.45                          | 1.55                  | 3.18                          | 1.80                          | 3.83                          | 2.09    | 1.29                                            | 3.85            | 18.21                         | 7.57                          | 6.47    | 1.86    | 2.22            | 1.99            |
| Rel. Inten. (% of BP)   | 9.16   | 10.11                                           | 54.50                         | 8.73                            | 49.56                         | 22.79                                                           | 9.52                            | 8.55                       | 21.07                       | 14.10              | 9.58         | 24.41                         | 8.51                  | 17.45                         | 9.87                          | 21.06                         | 11.50   | 7.06                                            | 21.16           | 100.00                        | 41.57                         | 35.51   | 10.19   | 12.21           | 10.91           |
| Score                   | -0.09  | 1.00                                            | 1.00                          | 1.00                            | 1.00                          | 1.00                                                            | 1.00                            | 1.00                       | -0.21                       | -0.14              | -0.10        | 1.00                          | -0.09                 | 1.00                          | 1.00                          | 1.00                          | -0.12   | 0.50                                            | 1.00            | 1.00                          | 1.00                          | -0.36   | -0.10   | 1.00            | 1.00            |
| Ion-type                |        | b <sup>++</sup> <sub>12</sub>                   | y <sup>++</sup> <sub>10</sub> | b <sub>7</sub> -NH <sub>3</sub> | y <sup>++</sup> <sub>12</sub> | y <sup>++</sup> <sub>13</sub>                                   | y <sup>++</sup> <sub>14</sub>   | y <sub>6</sub>             |                             |                    |              | y <sup>++</sup> <sub>17</sub> |                       | y <sup>++</sup> <sub>18</sub> | y <sup>++</sup> <sub>20</sub> | y <sup>++</sup> <sub>21</sub> |         | y <sup>++</sup> <sub>22</sub> -H <sub>2</sub> O | b <sub>12</sub> | b <sub>12</sub>               | y <sub>10</sub>               |         |         | b <sub>14</sub> | y <sub>12</sub> |
| Delta Da                |        | -0.65                                           | 0.39                          | 0.25                            | 0.32                          | 0.23                                                            | 0.66                            | 0.29                       |                             |                    |              | 0.56                          |                       | 0.25                          | 0.45                          | 0.12                          |         | 0.39                                            | 0.39            | 0.66                          | 0.16                          |         |         | 0.31            | 0.13            |
|                         |        | y <sup>++</sup> <sub>10</sub> -H <sub>2</sub> O |                               | y <sup>++</sup> <sub>11</sub>   |                               |                                                                 | y <sup>+++</sup> <sub>22</sub>  |                            |                             |                    |              |                               |                       |                               |                               |                               |         |                                                 | 0.44            | y <sup>++</sup> <sub>22</sub> | y <sup>++</sup> <sub>22</sub> |         |         |                 |                 |

# Peak 109

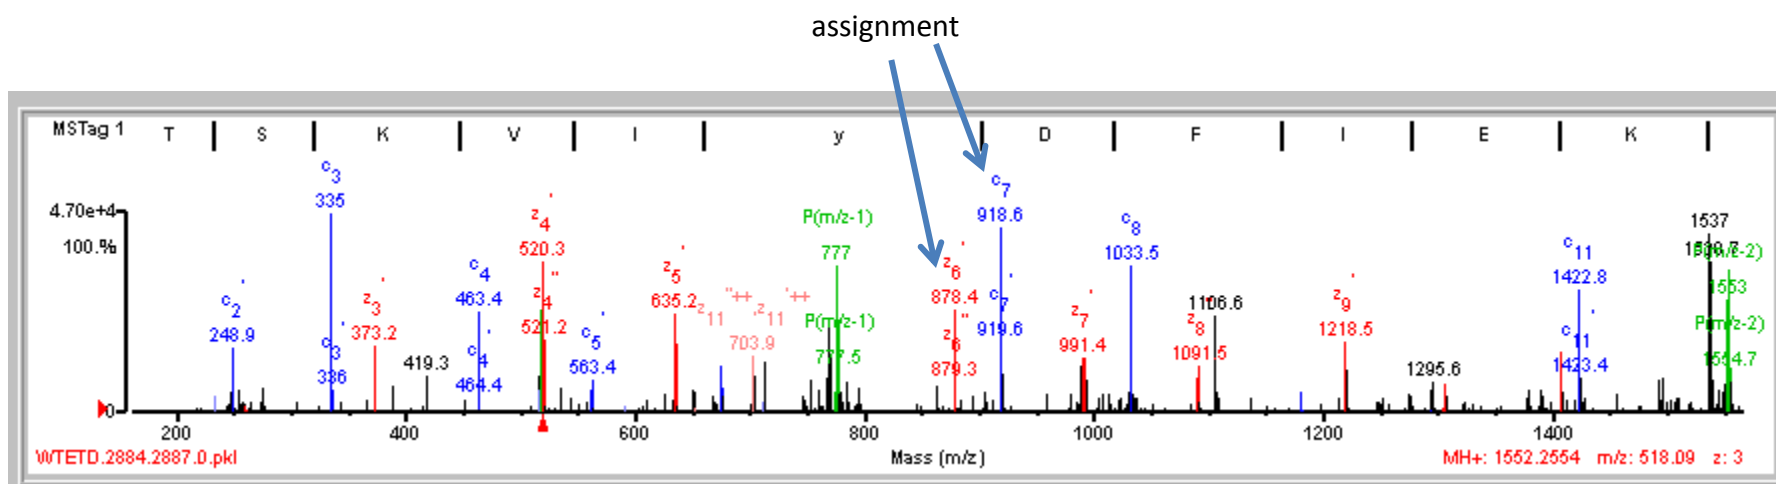

| Rank | Score                  | SPI (%)        | BCS            | # Unmatched Ions | Variable sites | Sequence                      | MH <sup>+</sup> Calculated (Da) | MH <sup>+</sup> Error (Da) | MH <sup>+</sup> Error (ppm) | Protein MW/pl (Da) | Species        | Accession #              | MS-Digest Index #     | Protein Name                               |                |                |                |                |                |                |                 |                 |                 |                 |
|------|------------------------|----------------|----------------|------------------|----------------|-------------------------------|---------------------------------|----------------------------|-----------------------------|--------------------|----------------|--------------------------|-----------------------|--------------------------------------------|----------------|----------------|----------------|----------------|----------------|----------------|-----------------|-----------------|-----------------|-----------------|
| 1    | 14.79                  | 92.7           | 10             | 3/23             | Y256y          | (R)E/T S K V I y D F/I E K(T) | 1471.77                         | 80.4876                    | 335.8                       | 54827.2/8.04       | Homo sapiens   | <a href="#">51702526</a> | <a href="#">37222</a> | Wiskott-Aldrich syndrome gene-like protein |                |                |                |                |                |                |                 |                 |                 |                 |
|      | Fragment-ion (m/z)     | 248.90         | 335.04         | 373.20           | 463.36         | 521.25                        | 562.28                          | 635.25                     | 651.36                      | 675.47             | 703.90         | 713.45                   | 878.45                | 918.56                                     | 989.52         | 991.39         | 1030.84        | 1033.52        | 1091.49        | 1106.65        | 1218.53         | 1306.06         | 1407.95         | 1422.83         |
|      | Frac. Inten.(% of TIC) | 2.65           | 7.66           | 2.24             | 3.96           | 3.24                          | 2.05                            | 6.47                       | 1.70                        | 2.99               | 3.20           | 3.00                     | 5.16                  | 10.25                                      | 2.45           | 4.77           | 1.85           | 6.80           | 2.53           | 4.56           | 8.12            | 2.45            | 3.24            | 8.65            |
|      | Rel. Inten.(% of BP)   | 25.82          | 74.67          | 21.84            | 38.64          | 31.64                         | 20.02                           | 63.12                      | 16.61                       | 29.12              | 31.24          | 29.29                    | 50.33                 | 100.00                                     | 23.88          | 46.57          | 18.01          | 66.37          | 24.68          | 44.52          | 79.20           | 23.89           | 31.60           | 84.39           |
|      | Score                  | 0.25           | 1.00           | 1.00             | 1.00           | 0.25                          | 1.00                            | 1.00                       | 0.25                        | 1.00               | 1.00           | 1.00                     | 1.00                  | 1.00                                       | -0.24          | 1.00           | -0.18          | 1.00           | 0.25           | 0.25           | 1.00            | 1.00            | 0.25            | 1.00            |
|      | Ion-type               | c <sub>2</sub> | c <sub>3</sub> | z <sub>3</sub>   | c <sub>4</sub> | z <sub>4</sub>                | c <sub>5</sub>                  | z <sub>5</sub>             | y <sub>5</sub>              | c <sub>6</sub>     | z <sub>6</sub> | z <sub>6</sub>           | z <sub>6</sub>        | c <sub>7</sub>                             | z <sub>7</sub> | z <sub>7</sub> | c <sub>8</sub> | z <sub>8</sub> | y <sub>8</sub> | z <sub>9</sub> | z <sub>10</sub> | z <sub>10</sub> | z <sub>11</sub> | c <sub>11</sub> |
|      | Delta Da               | -0.23          | -0.12          | -0.02            | 0.11           | -0.05                         | -0.04                           | -0.07                      | 0.03                        | 0.07               | 0.06           | 0.10                     | 0.13                  | -0.04                                      | 0.06           | -0.02          | 0.13           | -0.06          | 0.43           | 0.27           | 0.17            | 0.14            | 0.17            | 0.14            |

# Peak 110

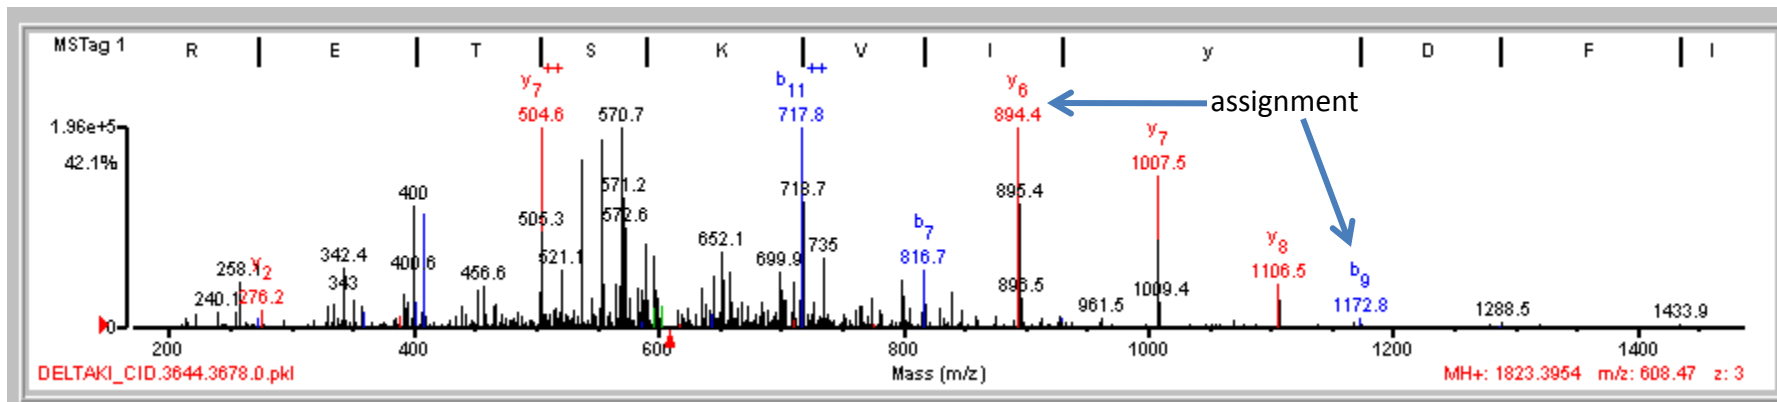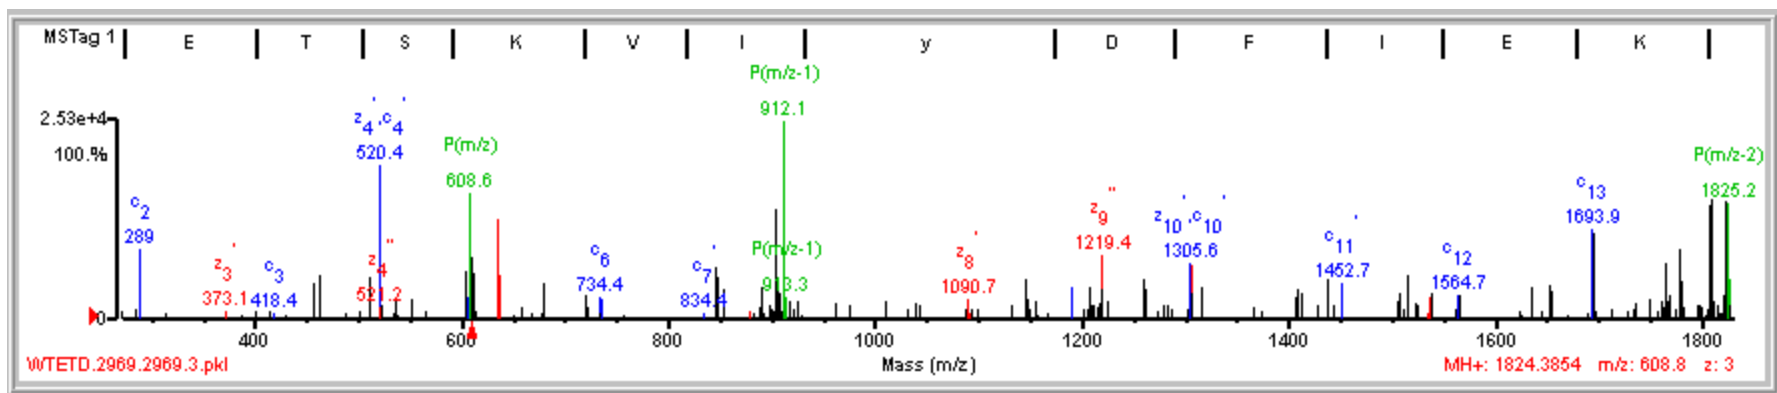

| Rank                   | Score                             | SPI (%)           | BCS               | # Unmatched Ions  | Variable sites | Sequence                              | MH <sup>+</sup> Calculated (Da) | MH <sup>+</sup> Error (Da) | MH <sup>+</sup> Error (ppm)      | Protein MW/pi (Da) | Species        | Accession #                         | MS-Digest Index #     | Protein Name                               |        |                                 |        |                    |        |                                 |                |                |                |                |
|------------------------|-----------------------------------|-------------------|-------------------|-------------------|----------------|---------------------------------------|---------------------------------|----------------------------|----------------------------------|--------------------|----------------|-------------------------------------|-----------------------|--------------------------------------------|--------|---------------------------------|--------|--------------------|--------|---------------------------------|----------------|----------------|----------------|----------------|
| 1                      | 15.89                             | 89.9              | 7                 | 6/24              | Y256y          | (K)D/R E T S\K V I /Y/D I F I E K (T) | 1742.90                         | 80.4995                    | 292.4                            | 54827.2/8.04       | Homo sapiens   | <a href="#">51702526</a>            | <a href="#">37222</a> | Wiskott-Aldrich syndrome gene-like protein |        |                                 |        |                    |        |                                 |                |                |                |                |
| Fragment-ion (m/z)     | 342.39                            | 400.05            | 409.04            | 504.65            | 521.09         | 536.82                                | 554.24                          | 564.53                     | 570.69                           | 576.49             | 589.79         | 635.94                              | 644.88                | 652.11                                     | 657.88 | 699.93                          | 710.81 | 717.80             | 735.00 | 798.81                          | 816.68         | 894.44         | 1007.54        | 1106.53        |
| Frac. Inten.(% of TIC) | 2.16                              | 4.54              | 2.85              | 7.45              | 1.80           | 4.94                                  | 5.83                            | 1.38                       | 16.69                            | 0.04               | 3.36           | 1.87                                | 3.25                  | 2.77                                       | 1.58   | 3.69                            | 1.64   | 11.15              | 1.57   | 1.83                            | 2.32           | 9.41           | 6.08           | 1.80           |
| Rel. Inten.(% of BP)   | 12.93                             | 27.19             | 17.10             | 44.65             | 10.81          | 29.62                                 | 34.94                           | 8.27                       | 100.00                           | 0.25               | 20.14          | 11.19                               | 19.46                 | 16.59                                      | 9.45   | 22.09                           | 9.83   | 66.82              | 9.38   | 10.95                           | 13.89          | 56.37          | 36.42          | 10.81          |
| Score                  | -0.13                             | 0.50              | 1.00              | 1.00              | -0.11          | 1.00                                  | 1.00                            | -0.08                      | 1.00                             | 1.50               | 1.00           | 0.50                                | 1.00                  | 1.00                                       | -0.09  | 1.00                            | -0.10  | 1.00               | -0.09  | 0.50                            | 1.00           | 1.00           | 1.00           | 1.00           |
| Ion-type               | b <sub>++</sub> -H <sub>2</sub> O | b <sub>++</sub> - | y <sub>++</sub> - | y <sub>++</sub> - | y <sub>4</sub> | y <sub>++8</sub>                      |                                 |                            | b <sub>5</sub> -H <sub>2</sub> O | sty                | b <sub>5</sub> | b <sub>++10</sub> -H <sub>2</sub> O | b <sub>++10</sub>     |                                            |        | b <sub>6</sub> -NH <sub>3</sub> |        | b <sub>6</sub>     |        | b <sub>7</sub> -NH <sub>3</sub> | b <sub>7</sub> | y <sub>6</sub> | y <sub>7</sub> | y <sub>8</sub> |
| Delta Da               | 0.34                              | 0.33              | 0.42              | 0.51              | 0.48           |                                       |                                 |                            | -0.56                            | 0.86               | 0.53           | 0.66                                | 0.60                  | 0.78                                       | -0.40  |                                 | 0.45   |                    |        | -0.58                           | 0.26           | 0.08           | 0.09           | 0.01           |
|                        |                                   |                   |                   |                   |                |                                       |                                 |                            | y <sub>+++13</sub>               |                    |                |                                     |                       |                                            |        |                                 |        | b <sub>+++11</sub> |        |                                 |                |                |                |                |



# Peak 112

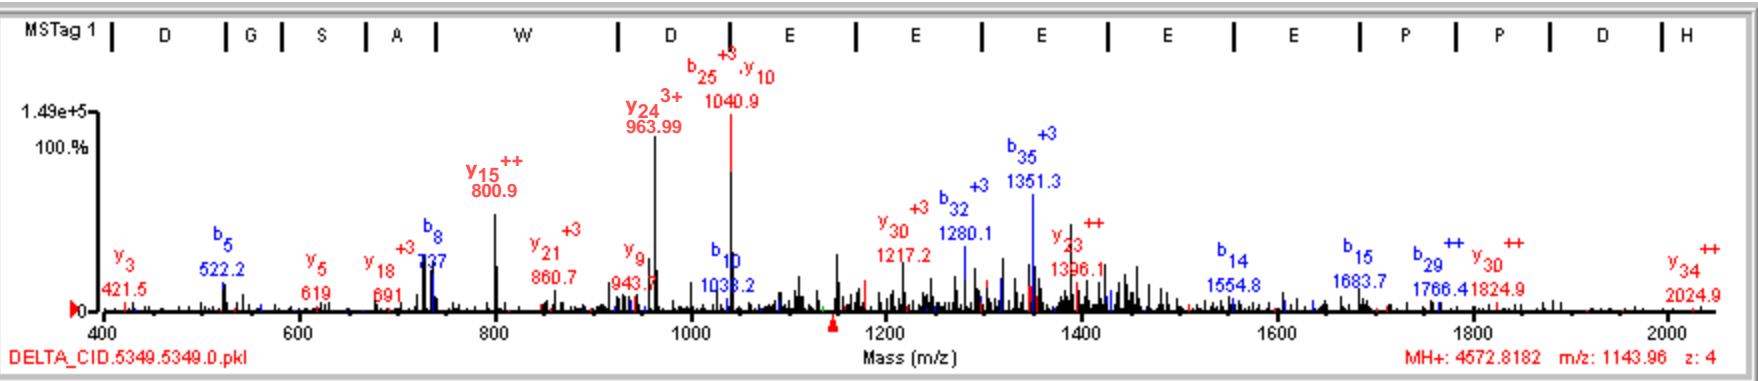

| Rank | Score | SP1 (%) | BCS | # Unmatched Ions | Variable sites | Sequence                                                                               | MH* Calculated (Da) | MH* Error (Da) | MH* Error (ppm) | Protein MW/pi (Da) | Species      | Accession #              | MS-Digest Index #     | Protein Name                                                                 |
|------|-------|---------|-----|------------------|----------------|----------------------------------------------------------------------------------------|---------------------|----------------|-----------------|--------------------|--------------|--------------------------|-----------------------|------------------------------------------------------------------------------|
| 1    | 15.92 | 83.4    | 13  | 5/23             | Y349y Y350y    | (R)H A/G/E/D/G S/A W/D E E E E E/P/P/D/H Q y y N D F I P G K E/P P L G G V V D H R (L) | 4410.89             | 161.9315       | 437.1           | 62849.5/6.10       | Homo sapiens | <a href="#">32693921</a> | <a href="#">18788</a> | SHC (Src homology 2 domain containing) transforming protein 1 isoform p85Shc |
| 1    | 15.92 | 83.4    | 13  | 5/23             | Y239y Y240y    | (R)H A/G/E/D/G S/A W/D E E E E E/P/P/D/H Q y y N D F I P G K E/P P L G G V V D H R (L) | 4410.89             | 161.9315       | 437.1           | 51681.9/6.71       | Homo sapiens | <a href="#">32261324</a> | <a href="#">26892</a> | SHC (Src homology 2 domain containing) transforming protein 1 isoform p52Shc |

  

| Fragment-ion (m/z)     | 522.17         | 727.11                        | 736.06 | 800.90 | 956.07                         | 963.99                         | 1040.87                           | 1149.61                        | 1217.24                          | 1280.06                        | 1290.58                        | 1302.89                        | 1319.07 | 1332.66                        | 1347.18                        | 1351.29 | 1357.09                        | 1389.74                        | 1396.13                        | 1423.34                        | 1438.83                        | 1445.33                        | 1457.82                        |
|------------------------|----------------|-------------------------------|--------|--------|--------------------------------|--------------------------------|-----------------------------------|--------------------------------|----------------------------------|--------------------------------|--------------------------------|--------------------------------|---------|--------------------------------|--------------------------------|---------|--------------------------------|--------------------------------|--------------------------------|--------------------------------|--------------------------------|--------------------------------|--------------------------------|
| Frac. Inten (% of TIC) | 3.06           | 4.61                          | 3.81   | 5.51   | 2.47                           | 12.07                          | 15.34                             | 3.83                           | 4.03                             | 4.55                           | 3.83                           | 2.47                           | 2.49    | 2.26                           | 2.26                           | 6.88    | 2.50                           | 5.75                           | 2.84                           | 2.58                           | 2.33                           | 2.53                           | 2.38                           |
| Rel. Inten (% of BP)   | 19.94          | 30.03                         | 24.87  | 35.93  | 16.08                          | 75.72                          | 100.00                            | 23.88                          | 26.25                            | 29.92                          | 24.59                          | 16.13                          | 16.24   | 14.72                          | 14.71                          | 43.55   | 16.31                          | 37.45                          | 18.45                          | 18.79                          | 15.17                          | 16.49                          | 15.50                          |
| Score                  | 1.00           | 1.00                          | -0.25  | -0.38  | -0.18                          | 1.00                           | 1.00                              | 0.50                           | 1.00                             | 0.50                           | 1.00                           | 1.00                           | 1.00    | -0.15                          | 1.00                           | 1.00    | -0.16                          | 1.00                           | 1.00                           | 1.00                           | 1.00                           | 1.00                           | 1.00                           |
| Ion-type               | b <sub>5</sub> | y <sup>+++</sup> <sub>4</sub> |        |        | y <sup>+++</sup> <sub>24</sub> | b <sup>+++</sup> <sub>25</sub> | b <sub>11</sub> -H <sub>2</sub> O | y <sup>+++</sup> <sub>30</sub> | y <sub>12</sub> -NH <sub>3</sub> | y <sup>+++</sup> <sub>21</sub> | y <sup>+++</sup> <sub>22</sub> | b <sup>+++</sup> <sub>34</sub> |         | y <sup>+++</sup> <sub>22</sub> | y <sup>+++</sup> <sub>34</sub> |         | y <sup>+++</sup> <sub>30</sub> | y <sup>+++</sup> <sub>30</sub> | y <sup>+++</sup> <sub>27</sub> | y <sup>+++</sup> <sub>30</sub> | y <sup>+++</sup> <sub>24</sub> | y <sup>+++</sup> <sub>27</sub> | y <sup>+++</sup> <sub>27</sub> |
| Delta Da               | -0.03          | 0.72                          |        |        | 0.68                           | 0.18                           | 0.18                              | 0.42                           | -0.61                            | 0.54                           | 0.38                           | 0.80                           |         | -0.38                          | 0.74                           |         | 0.85                           | 0.08                           | 0.78                           | 0.92                           | 0.72                           | 0.50                           |                                |

# Peak 113

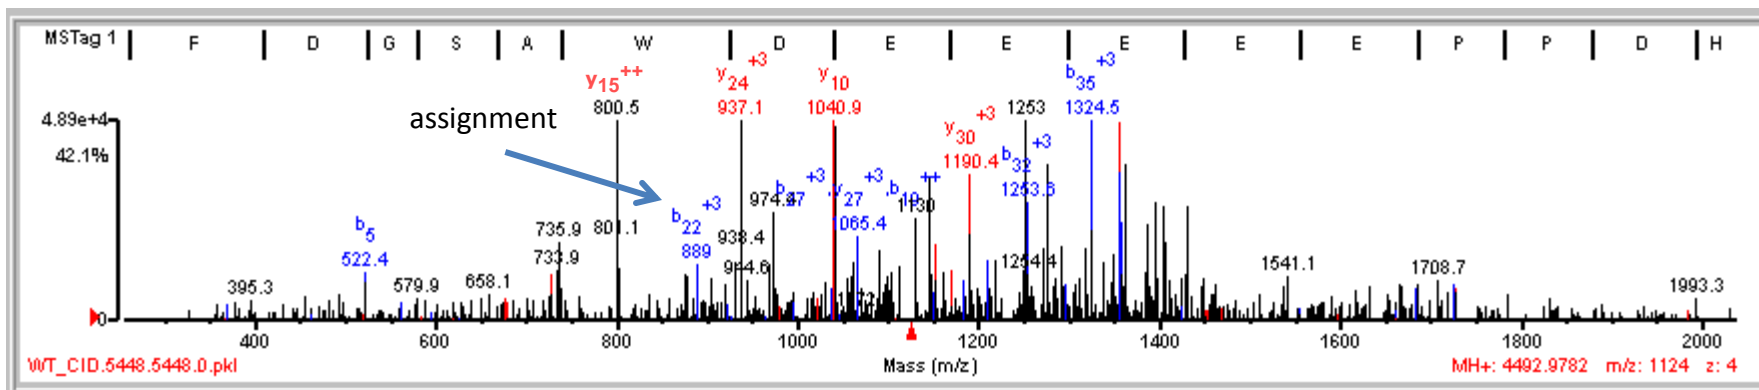

| Rank | Score | SPI (%) | BCS | # Unmatched Ions | Variable sites | Sequence                                                                                 | MH* Calculated (Da) | MH* Error (Da) | MH* Error (ppm) | Protein MW/pi (Da) | Species      | Accession #              | MS-Digest Index #     | Protein Name                                                                 |
|------|-------|---------|-----|------------------|----------------|------------------------------------------------------------------------------------------|---------------------|----------------|-----------------|--------------------|--------------|--------------------------|-----------------------|------------------------------------------------------------------------------|
| 1    | 15.95 | 86.7    | 13  | 5/22             | Y350y          | (R)M A G F D G S A W D E E E E P P D H Q (Y) V N D I F P G K E I P P L G G V V D M R (L) | 4410.89             | 82.0915        | 473.0           | 62849.5/6.10       | Homo sapiens | <a href="#">52693921</a> | <a href="#">18788</a> | SHC (Src homology 2 domain containing) transforming protein 1 isoform p65Shc |
| 1    | 15.95 | 86.7    | 13  | 5/22             | Y240y          | (R)M A G F D G S A W D E E E E P P D H Q (Y) V N D I F P G K E I P P L G G V V D M R (L) | 4410.89             | 82.0915        | 473.0           | 51681.9/6.71       | Homo sapiens | <a href="#">32261324</a> | <a href="#">26862</a> | SHC (Src homology 2 domain containing) transforming protein 1 isoform p52Shc |

  

| Fragment-ion (m/z)      | 735.92 | 800.51            | 937.08            | 974.36 | 1040.86         | 1059.97 | 1129.96           | 1146.37 | 1151.92            | 1190.44            | 1210.57           | 1253.03            | 1276.43            | 1324.53            | 1356.26           | 1363.13            | 1387.89 | 1396.75         | 1405.30           | 1431.28            | 1447.49           | 1725.84           |
|-------------------------|--------|-------------------|-------------------|--------|-----------------|---------|-------------------|---------|--------------------|--------------------|-------------------|--------------------|--------------------|--------------------|-------------------|--------------------|---------|-----------------|-------------------|--------------------|-------------------|-------------------|
| Frac. Inten. (% of TIC) | 2.19   | 5.99              | 12.73             | 2.47   | 9.12            | 1.07    | 1.64              | 4.81    | 2.50               | 4.38               | 1.67              | 9.63               | 3.90               | 7.84               | 8.39              | 3.80               | 2.17    | 3.55            | 4.75              | 3.09               | 1.65              | 2.06              |
| Rel. Inten. (% of BP)   | 17.19  | 47.02             | 100.00            | 19.40  | 71.83           | 13.14   | 12.88             | 37.77   | 19.84              | 34.38              | 13.12             | 75.64              | 30.80              | 61.61              | 65.87             | 29.88              | 17.03   | 27.84           | 37.34             | 24.27              | 12.99             | 16.18             |
| Score                   | -0.17  | 1.00              | 1.00              | -0.19  | 1.00            | -0.13   | 1.00              | -0.38   | 1.00               | 1.00               | 1.00              | 1.00               | 1.00               | 1.00               | 1.00              | 1.00               | -0.17   | 1.00            | 1.00              | 1.00               | 1.00              | 1.00              |
| Ion-type                |        | y++ <sub>15</sub> | y++ <sub>24</sub> |        | y <sub>10</sub> |         | b++ <sub>20</sub> |         | b+++ <sub>29</sub> | y+++ <sub>20</sub> | b++ <sub>21</sub> | y+++ <sub>31</sub> | y+++ <sub>32</sub> | y+++ <sub>34</sub> | y++ <sub>23</sub> | y+++ <sub>28</sub> |         | a <sub>13</sub> | y++ <sub>24</sub> | y+++ <sub>37</sub> | b++ <sub>24</sub> | b++ <sub>29</sub> |
| Delta Da                |        | 0.59              | 0.33              |        | 0.30            |         | 0.53              |         | 0.51               | 0.27               | -0.40             | 0.84               | 0.58               | 0.64               | 0.16              | 0.90               |         | -0.78           | 0.67              | 1.02               | 0.47              | -0.32             |

# Peak 114

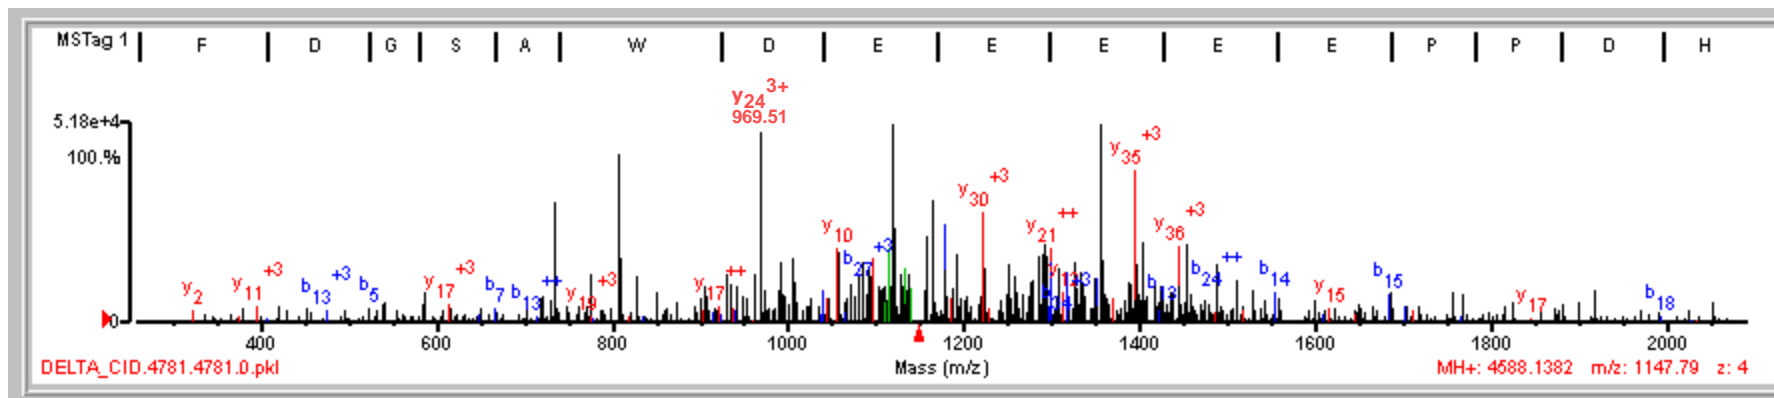

| Rank                    | Score | SPI (%) | BCS | # Unmatched Ions | Variable sites    | Sequence                                                                          | MH* Calculated (Da) | MH* Error (Da)     | MH* Error (ppm)                    | Protein MW/pi (Da) | Species      | Accession #              | MS-Digest Index #     | Protein Name                                                                 |                    |                    |                   |                    |                                     |         |
|-------------------------|-------|---------|-----|------------------|-------------------|-----------------------------------------------------------------------------------|---------------------|--------------------|------------------------------------|--------------------|--------------|--------------------------|-----------------------|------------------------------------------------------------------------------|--------------------|--------------------|-------------------|--------------------|-------------------------------------|---------|
| 1                       | 9.13  | 80.1    | 8   | 2/14             | M366m Y349y Y250y | (R)MAGFD/GS A/W/D E E E E E P P D/R/Q/y y N D/F P G K E I P P L G G V V D = R (L) | 4410.89             | 177.2515           | 288.6                              | 62849.5/6.10       | Homo sapiens | <a href="#">52693921</a> | <a href="#">18788</a> | SHC (Src homology 2 domain containing) transforming protein 1 isoform p86Shc |                    |                    |                   |                    |                                     |         |
| 1                       | 9.13  | 80.1    | 8   | 2/14             | M256m Y239y Y240y | (R)MAGFD/GS A/W/D E E E E E P P D/R/Q/y y N D/F P G K E I P P L G G V V D = R (L) | 4410.89             | 177.2515           | 288.6                              | 51681.9/6.71       | Homo sapiens | <a href="#">32261324</a> | <a href="#">26852</a> | SHC (Src homology 2 domain containing) transforming protein 1 isoform p52Shc |                    |                    |                   |                    |                                     |         |
| Fragment-ion (m/z)      |       |         |     |                  |                   |                                                                                   | 735.23              | 808.49             | 969.51                             | 992.68             | 1056.78      | 1115.87                  | 1120.27               | 1165.98                                                                      | 1178.03            | 1222.59            | 1284.75           | 1298.43            | 1356.32                             | 1394.46 |
| Frac. Inten. (% of TIC) |       |         |     |                  |                   |                                                                                   | 7.85                | 10.28              | 11.16                              | 5.08               | 8.24         | 0.17                     | 12.29                 | 5.40                                                                         | 6.10               | 8.42               | 4.93              | 5.24               | 10.40                               | 6.83    |
| Rel. Inten. (% of BP)   |       |         |     |                  |                   |                                                                                   | 82.28               | 83.64              | 90.76                              | 41.36              | 50.76        | 1.35                     | 100.00                | 43.93                                                                        | 49.86              | 88.48              | 40.11             | 42.86              | 84.63                               | 53.97   |
| Score                   |       |         |     |                  |                   |                                                                                   | -0.62               | 1.00               | 1.00                               | 0.25               | 1.00         | 1.00                     | 1.00                  | 1.00                                                                         | 1.00               | 1.00               | 1.00              | 1.00               | 1.00                                | 0.50    |
| Ion-type                |       |         |     |                  |                   |                                                                                   | y++ <sub>15</sub>   | y+++ <sub>24</sub> | y <sub>10</sub> -SOCH <sub>3</sub> | y <sub>10</sub>    | m            |                          | y++ <sub>19</sub>     | b+++ <sub>29</sub>                                                           | y+++ <sub>30</sub> | y+++ <sub>31</sub> | y++ <sub>21</sub> | y+++ <sub>24</sub> | y++ <sub>23</sub> -H <sub>2</sub> O |         |
| Delta Da                |       |         |     |                  |                   |                                                                                   | 0.57                | 0.77               | 0.13                               | 0.23               | 0.41         |                          | 0.50                  | 0.27                                                                         | 0.44               | 0.57               | 0.35              | 0.44               | -0.62                               |         |



# Peak 115

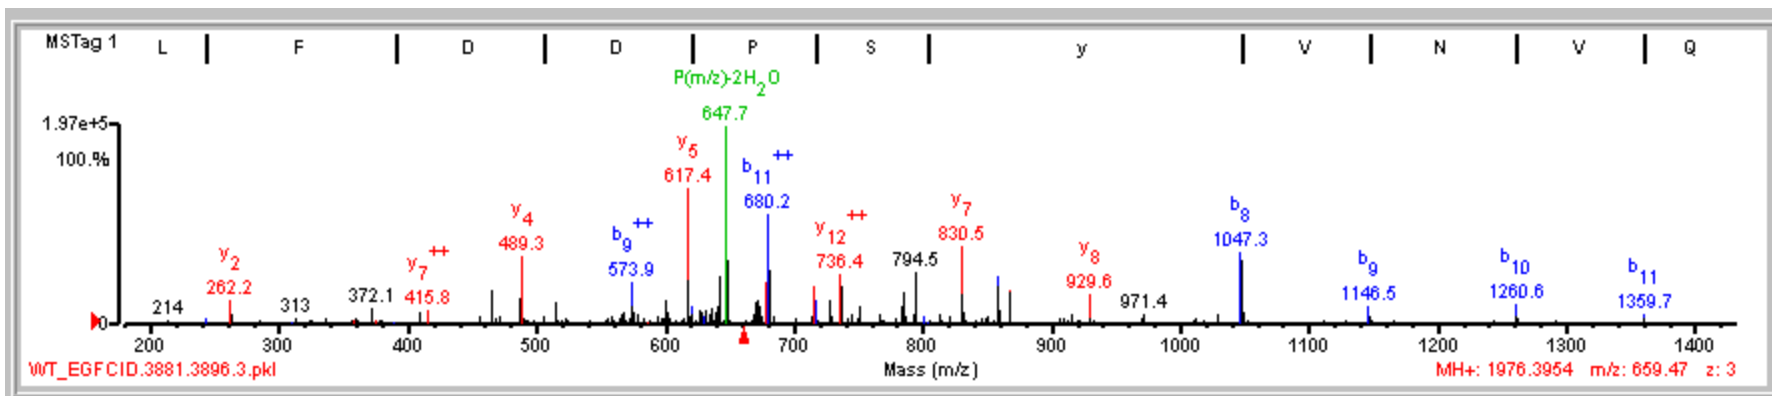

| Rank                    | Score          | SPI (%)                      | BCS                              | # Unmatched Ions | # Variable sites                | Sequence                                | MH* Calculated (Da) | MH* Error (Da)                | MH* Error (ppm)                                 | Protein MW/pi (Da)            | Species                       | Accession #                   | MS-Digest Index #             | Protein Name                                                                 |                               |                                                 |                               |                               |                               |                |                               |                               |                |                |                 |
|-------------------------|----------------|------------------------------|----------------------------------|------------------|---------------------------------|-----------------------------------------|---------------------|-------------------------------|-------------------------------------------------|-------------------------------|-------------------------------|-------------------------------|-------------------------------|------------------------------------------------------------------------------|-------------------------------|-------------------------------------------------|-------------------------------|-------------------------------|-------------------------------|----------------|-------------------------------|-------------------------------|----------------|----------------|-----------------|
| 1                       | 16.64          | 87.1                         | 10                               | 5/25             | Y427y                           | (R) E L/F/D/D P S y V/N V Q/N L D K (A) | 1895.90             | 80.4933                       | 266.6                                           | 62849.5/6.10                  | Homo sapiens                  | <a href="#">52693921</a>      | <a href="#">18788</a>         | SHC (Src homology 2 domain containing) transforming protein 1 isoform p66Shc |                               |                                                 |                               |                               |                               |                |                               |                               |                |                |                 |
| Fragment-ion (m/z)      | 262.18         | 465.84                       | 487.19                           | 489.31           | 573.87                          | 600.38                                  | 617.40              | 620.46                        | 635.73                                          | 642.29                        | 671.34                        | 673.56                        | 678.88                        | 680.20                                                                       | 716.44                        | 728.21                                          | 736.35                        | 785.45                        | 794.52                        | 830.48         | 857.95                        | 867.56                        | 929.57         | 1047.29        | 1260.64         |
| Frac. Inten. (% of TIC) | 1.94           | 1.86                         | 2.59                             | 4.74             | 3.21                            | 2.08                                    | 9.47                | 1.87                          | 2.45                                            | 2.92                          | 2.96                          | 2.21                          | 3.64                          | 8.82                                                                         | 5.03                          | 2.10                                            | 4.99                          | 3.40                          | 3.41                          | 6.50           | 7.25                          | 3.64                          | 2.30           | 8.02           | 2.60            |
| Rel. Inten. (% of BP)   | 20.48          | 19.62                        | 27.32                            | 50.06            | 33.84                           | 21.93                                   | 100.00              | 19.78                         | 25.86                                           | 30.80                         | 31.20                         | 23.38                         | 38.43                         | 93.13                                                                        | 53.14                         | 22.16                                           | 52.64                         | 35.94                         | 35.96                         | 68.63          | 76.54                         | 38.42                         | 24.25          | 84.63          | 27.45           |
| Score                   | 1.00           | 1.00                         | 0.50                             | 1.00             | -0.34                           | 0.50                                    | 1.00                | 1.00                          | -0.26                                           | -0.31                         | 0.50                          | -0.23                         | 1.00                          | 1.00                                                                         | 1.00                          | -0.22                                           | 1.00                          | 0.50                          | 1.00                          | 1.00           | 1.00                          | 1.00                          | 1.00           | 1.00           | 1.00            |
| Ion-type                | y <sub>2</sub> | y <sub>8</sub> <sup>++</sup> | b <sub>4</sub> -H <sub>2</sub> O | y <sub>4</sub>   | y <sub>5</sub> -NH <sub>3</sub> | y <sub>5</sub>                          | b <sub>5</sub>      | b <sub>11</sub> <sup>++</sup> | b <sub>11</sub> <sup>++</sup> -H <sub>2</sub> O | y <sub>11</sub> <sup>++</sup> | b <sub>11</sub> <sup>++</sup> | y <sub>11</sub> <sup>++</sup> | y <sub>11</sub> <sup>++</sup> | y <sub>11</sub> <sup>++</sup>                                                | y <sub>12</sub> <sup>++</sup> | y <sub>13</sub> <sup>++</sup> -H <sub>2</sub> O | y <sub>13</sub> <sup>++</sup> | y <sub>13</sub> <sup>++</sup> | y <sub>13</sub> <sup>++</sup> | y <sub>7</sub> | b <sub>14</sub> <sup>++</sup> | y <sub>14</sub> <sup>++</sup> | y <sub>8</sub> | b <sub>8</sub> | b <sub>10</sub> |
| Delta Da                | 0.04           | 0.58                         | -0.03                            | 0.04             | 0.08                            | 0.07                                    | 0.20                | 0.07                          | 0.07                                            | 0.07                          | 0.07                          | 0.07                          | 0.07                          | -0.08                                                                        | 0.05                          | 0.02                                            | 0.02                          | 0.61                          | 0.68                          | 0.04           | 0.08                          | 0.19                          | 0.06           | -0.08          | 0.16            |

# Peak 116

Ions that verify assignment

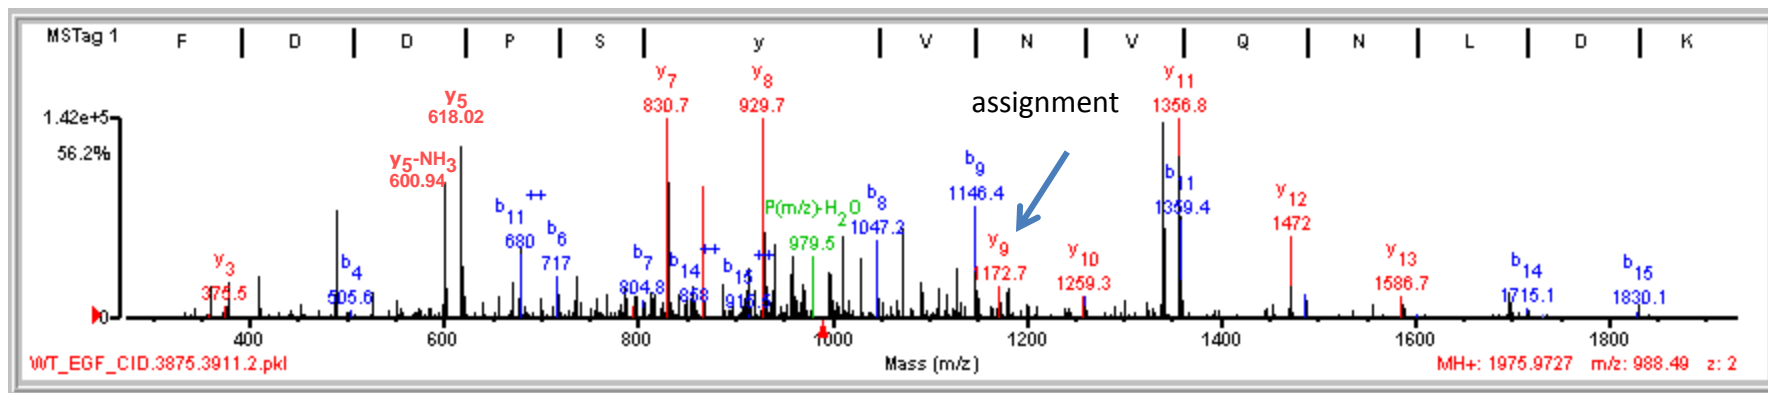

| Rank | Score | SPI (%) | BCS | # Unmatched Ions | Variable sites | Sequence                                  | MH* Calculated (Da) | MH* Error (Da) | MH* Error (ppm) | Protein MW/pl (Da) | Species      | Accession #              | MS-Digest Index #     | Protein Name                                                                 |
|------|-------|---------|-----|------------------|----------------|-------------------------------------------|---------------------|----------------|-----------------|--------------------|--------------|--------------------------|-----------------------|------------------------------------------------------------------------------|
| 1    | 14.71 | 86.5    | 9   | 6/24             | Y427y          | (R) E L/F D/D I P/S/Y V N/V Q/N L D K (A) | 1895.90             | 80.0706        | 52.8            | 62849.5/6.10       | Homo sapiens | <a href="#">52693921</a> | <a href="#">18788</a> | SHC (Src homology 2 domain containing) transforming protein 1 isoform p66Shc |
| 1    | 14.71 | 86.5    | 9   | 6/24             | Y318y          | (R) E L/F D/D I P/S/Y V N/V Q/N L D K (A) | 1895.90             | 80.0706        | 52.8            | 51681.9/6.71       | Homo sapiens | <a href="#">32261324</a> | <a href="#">26862</a> | SHC (Src homology 2 domain containing) transforming protein 1 isoform p52Shc |

  

| Fragment-ion (m/z)      | 489.74         | 600.94                          | 618.02         | 620.86         | 679.69                        | 716.99         | 830.72         | 867.71                        | 929.68         | 940.76 | 960.42 | 998.72 | 1011.44 | 1029.43                          | 1047.20        | 1073.03 | 1128.52                          | 1146.43        | 1172.74        | 1181.31 | 1341.64                           | 1356.80         | 1471.97         | 1696.88                           |
|-------------------------|----------------|---------------------------------|----------------|----------------|-------------------------------|----------------|----------------|-------------------------------|----------------|--------|--------|--------|---------|----------------------------------|----------------|---------|----------------------------------|----------------|----------------|---------|-----------------------------------|-----------------|-----------------|-----------------------------------|
| Frac. Inten. (% of TIC) | 3.17           | 4.81                            | 4.76           | 1.66           | 3.39                          | 1.61           | 12.05          | 3.70                          | 9.53           | 1.69   | 1.72   | 2.74   | 3.00    | 2.07                             | 3.32           | 2.63    | 1.72                             | 3.78           | 1.64           | 1.73    | 7.22                              | 17.09           | 3.18            | 1.80                              |
| Rel. Inten. (% of BP)   | 18.53          | 28.18                           | 27.87          | 9.70           | 19.84                         | 9.44           | 70.51          | 21.63                         | 55.79          | 9.92   | 10.07  | 16.01  | 17.56   | 12.14                            | 19.43          | 15.40   | 10.05                            | 22.10          | 9.62           | 10.10   | 42.23                             | 100.00          | 18.60           | 10.54                             |
| Score                   | 1.00           | 0.50                            | 1.00           | 1.00           | 1.00                          | 1.00           | 1.00           | 1.00                          | 1.00           | 1.00   | -0.10  | -0.10  | -0.18   | 0.50                             | 1.00           | -0.15   | 0.50                             | 1.00           | 1.00           | -0.10   | 0.50                              | 1.00            | 1.00            | 0.50                              |
| Ion-type                | y <sub>4</sub> | y <sub>5</sub> -NH <sub>3</sub> | y <sub>5</sub> | b <sub>5</sub> | b <sup>++</sup> <sub>11</sub> | b <sub>6</sub> | y <sub>7</sub> | y <sup>++</sup> <sub>14</sub> | y <sub>8</sub> |        |        |        |         | b <sub>8</sub> -H <sub>2</sub> O | b <sub>8</sub> |         | b <sub>9</sub> -H <sub>2</sub> O | b <sub>9</sub> | y <sub>9</sub> |         | b <sub>11</sub> -H <sub>2</sub> O | y <sub>11</sub> | y <sub>12</sub> | b <sub>14</sub> -H <sub>2</sub> O |
| Delta Da                | 0.47           | 0.64                            | 0.69           | 0.60           | -0.59                         | -0.32          | 0.28           | 0.34                          | 0.17           |        |        |        |         | 0.07                             | -0.17          |         | 0.09                             | -0.01          | 0.21           |         | 0.10                              | 0.18            | 0.32            | 0.15                              |





# Peak 119

Ions that verify assignment

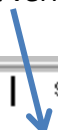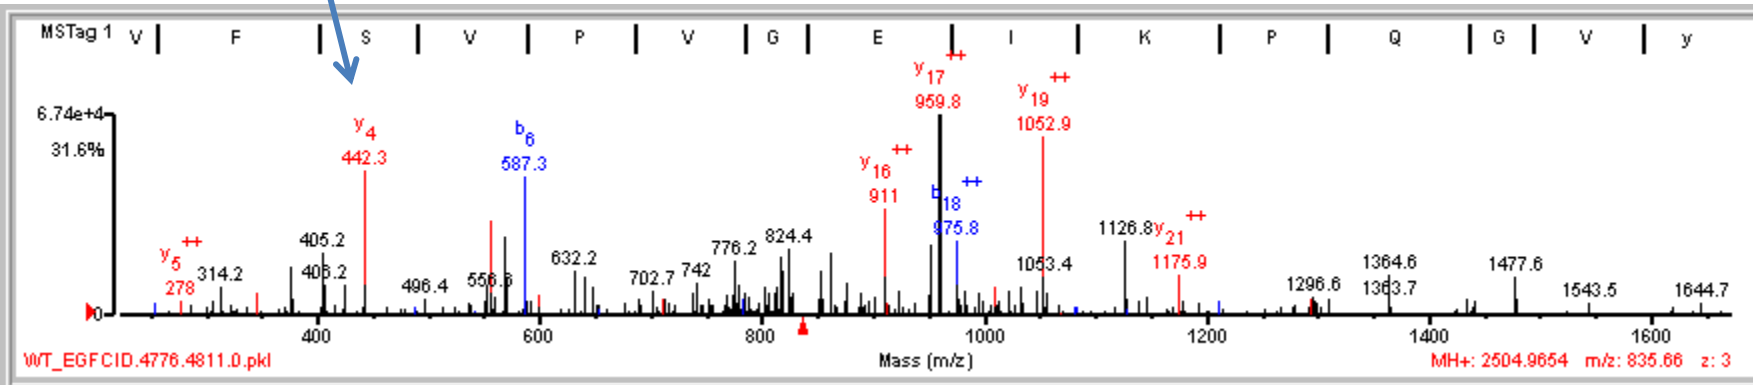

| Rank                    | Score  | SPI (%) | BCS                              | Unmatched Ions | Variable sites | Sequence                                              | m/z Calculated (Da) | m/z Error (Da) | m/z Error (ppm) | MW/pI (Da)   | Species                        | Accession # | Digest Index # | Protein Name                                                                |                               |                                   |                               |                               |                               |                                |         |                                 |                               |                               |         |
|-------------------------|--------|---------|----------------------------------|----------------|----------------|-------------------------------------------------------|---------------------|----------------|-----------------|--------------|--------------------------------|-------------|----------------|-----------------------------------------------------------------------------|-------------------------------|-----------------------------------|-------------------------------|-------------------------------|-------------------------------|--------------------------------|---------|---------------------------------|-------------------------------|-------------------------------|---------|
| 1                       | 13.84  | 82.5    | 10                               | 9/25           | Y214y          | (K) G/P/V/E/S/V E/V/G E I K P Q G V Y D I/P P T K (G) | 2424.32             | 80.6481        | 272.2           | 92861.3/6.23 | Homo sapiens                   | 5453680     | 8768           | neural precursor cell expressed, developmentally down-regulated 9 isoform 1 |                               |                                   |                               |                               |                               |                                |         |                                 |                               |                               |         |
| Fragment-ion (m/z)      | 377.21 | 405.18  | 424.35                           | 442.32         | 555.44         | 569.29                                                | 587.33              | 776.15         | 779.31          | 806.04       | 816.83                         | 853.98      | 861.52         | 910.96                                                                      | 951.47                        | 959.77                            | 960.15                        | 975.77                        | 1008.97                       | 1033.09                        | 1052.87 | 1126.82                         | 1175.93                       | 1364.65                       | 1476.77 |
| Frac. Inten. (% of TIC) | 1.87   | 2.96    | 1.49                             | 5.30           | 3.90           | 3.36                                                  | 4.78                | 1.59           | 1.73            | 1.49         | 2.20                           | 2.16        | 2.97           | 4.20                                                                        | 2.08                          | 7.70                              | 26.46                         | 3.62                          | 2.47                          | 1.41                           | 7.04    | 3.51                            | 1.39                          | 1.77                          | 2.53    |
| Rel. Inten. (% of BP)   | 7.07   | 11.19   | 5.64                             | 20.03          | 14.72          | 12.71                                                 | 18.06               | 6.01           | 6.55            | 5.62         | 8.32                           | 8.18        | 11.24          | 15.89                                                                       | 7.86                          | 29.11                             | 100.00                        | 13.70                         | 9.34                          | 5.35                           | 26.61   | 13.28                           | 5.25                          | 6.70                          | 9.56    |
| Score                   | -0.07  | -0.11   | 0.50                             | 1.00           | 1.00           | 0.50                                                  | 1.00                | -0.06          | -0.07           | -0.06        | 1.00                           | -0.08       | 1.00           | 1.00                                                                        | 0.50                          | 1.00                              | 1.00                          | 1.00                          | 1.00                          | -0.05                          | 1.00    | 1.00                            | 1.00                          | -0.07                         | -0.10   |
| Ion-type                |        |         | y <sub>4</sub> -H <sub>2</sub> O | y <sub>4</sub> | y <sub>5</sub> | b <sub>6</sub> -H <sub>2</sub> O                      | b <sub>6</sub>      |                |                 |              | y <sup>+++</sup> <sub>22</sub> |             |                | y <sup>++</sup> <sub>15</sub>                                               | y <sup>++</sup> <sub>16</sub> | b <sub>10</sub> -H <sub>2</sub> O | y <sup>++</sup> <sub>17</sub> | y <sup>++</sup> <sub>17</sub> | b <sup>++</sup> <sub>18</sub> | y <sup>+++</sup> <sub>18</sub> |         | y <sup>+++</sup> <sub>19</sub>  | y <sup>++</sup> <sub>20</sub> | y <sup>++</sup> <sub>21</sub> |         |
| Delta Da                |        |         | 0.09                             | 0.05           | 0.09           | -0.02                                                 | 0.01                |                |                 |              | 0.40                           |             |                | 0.09                                                                        | -0.00                         | -0.02                             | 0.28                          | 0.66                          | 0.30                          | -0.05                          |         | 0.33                            | 0.75                          | 0.32                          |         |
|                         |        |         |                                  |                |                |                                                       |                     |                |                 |              |                                |             |                |                                                                             |                               |                                   |                               |                               |                               |                                |         | y <sub>3</sub> -NH <sub>3</sub> |                               |                               |         |
|                         |        |         |                                  |                |                |                                                       |                     |                |                 |              |                                |             |                |                                                                             |                               |                                   |                               |                               |                               |                                |         | 0.40                            |                               |                               |         |



# Peak 121

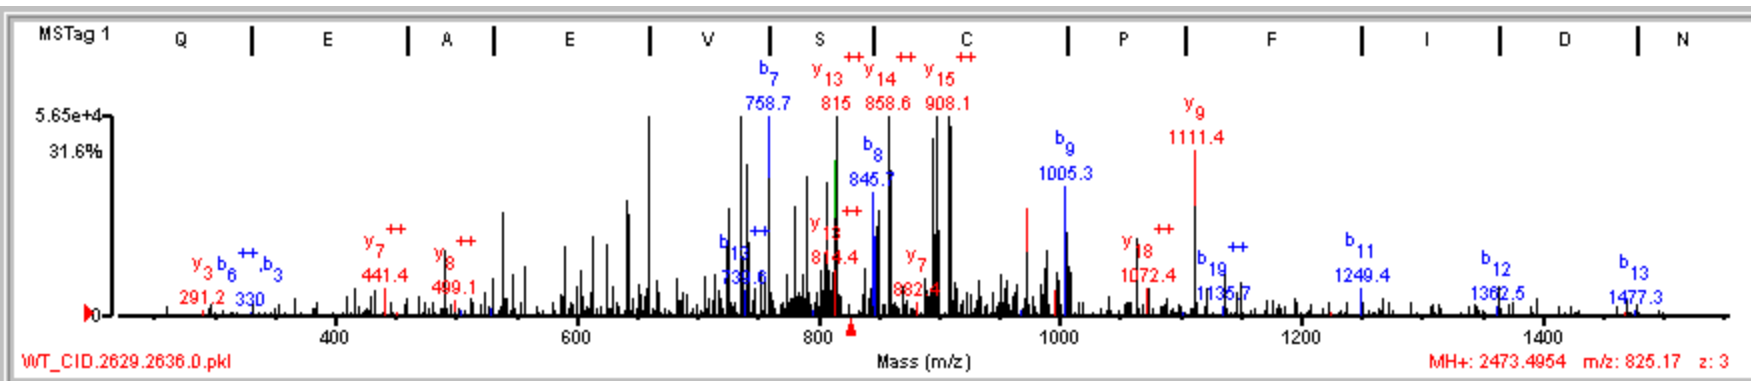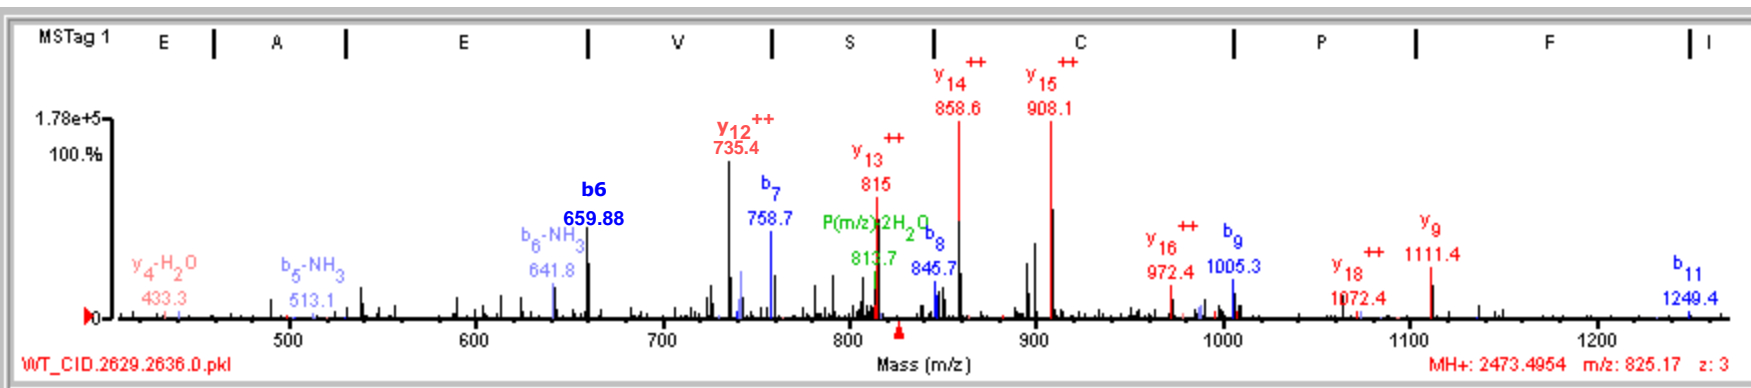

| Rank | Score | SPI (%) | BCS | # Unmatched Ions | Variable sites | Sequence                                          | MH <sup>+</sup> Calculated (Da) | MH <sup>+</sup> Error (Da) | MH <sup>+</sup> Error (ppm) | Protein MW/pI (Da) | Species      | Accession #               | MS-Digest Index #     | Protein Name                                                 |
|------|-------|---------|-----|------------------|----------------|---------------------------------------------------|---------------------------------|----------------------------|-----------------------------|--------------------|--------------|---------------------------|-----------------------|--------------------------------------------------------------|
| 1    | 17.81 | 90.8    | 10  | 3/25             | Y288y          | (R) N S/Q E/A/E/V S C P F I/D N T/Y/S C S G K (L) | 2393.00                         | 80.4934                    | 213.1                       | 52936.5/5.37       | Homo sapiens | <a href="#">5454168</a>   | <a href="#">5828</a>  | RanBP-type and C3HC4-type zinc finger containing 1 isoform 1 |
| 1    | 17.81 | 90.8    | 10  | 3/25             | Y330y          | (R) N S/Q E/A/E/V S C P F I/D N T/Y/S C S G K (L) | 2393.00                         | 80.4934                    | 213.1                       | 57572.1/5.47       | Homo sapiens | <a href="#">144953898</a> | <a href="#">36345</a> | RanBP-type and C3HC4-type zinc finger containing 1 isoform 2 |

  

| Fragment-ion (m/z)      | 538.69         | 604.22                                          | 613.31                        | 624.75                        | 641.81                          | 659.88         | 726.30                                          | 735.40                        | 741.74                          | 758.70         | 781.71         | 790.91 | 807.22 | 815.03                        | 845.70         | 849.79                                          | 858.56                        | 895.62 | 898.99                                          | 908.12                        | 972.44                        | 987.17                           | 1005.34        | 1008.41                       | 1111.42        |
|-------------------------|----------------|-------------------------------------------------|-------------------------------|-------------------------------|---------------------------------|----------------|-------------------------------------------------|-------------------------------|---------------------------------|----------------|----------------|--------|--------|-------------------------------|----------------|-------------------------------------------------|-------------------------------|--------|-------------------------------------------------|-------------------------------|-------------------------------|----------------------------------|----------------|-------------------------------|----------------|
| Frac. Inten. (% of TIC) | 2.12           | 1.14                                            | 1.31                          | 1.20                          | 2.75                            | 5.07           | 1.96                                            | 10.19                         | 2.77                            | 5.29           | 1.94           | 3.41   | 2.39   | 8.22                          | 3.33           | 2.83                                            | 11.91                         | 3.41   | 4.04                                            | 13.26                         | 2.98                          | 1.21                             | 2.66           | 1.26                          | 3.33           |
| Rel. Inten. (% of BP)   | 15.98          | 8.58                                            | 9.91                          | 9.02                          | 20.76                           | 38.24          | 14.81                                           | 76.83                         | 20.89                           | 39.93          | 14.64          | 25.74  | 18.01  | 62.01                         | 25.15          | 21.32                                           | 89.80                         | 25.75  | 30.44                                           | 100.00                        | 22.46                         | 9.12                             | 20.08          | 9.47                          | 25.12          |
| Score                   | 1.00           | 0.50                                            | 1.00                          | 1.00                          | 0.50                            | 1.00           | 0.50                                            | 1.00                          | 0.50                            | 1.00           | 1.00           | -0.26  | -0.18  | 1.00                          | 1.00           | 0.50                                            | 1.00                          | -0.26  | 0.50                                            | 1.00                          | 1.00                          | 0.50                             | 1.00           | 1.00                          | 1.00           |
| Ion-type                | y <sub>5</sub> | y <sup>++</sup> <sub>10</sub> -H <sub>2</sub> O | y <sup>++</sup> <sub>10</sub> | b <sup>++</sup> <sub>11</sub> | b <sub>6</sub> -NH <sub>3</sub> | b <sub>6</sub> | y <sup>++</sup> <sub>12</sub> -H <sub>2</sub> O | y <sup>++</sup> <sub>12</sub> | b <sub>7</sub> -NH <sub>3</sub> | b <sub>7</sub> | y <sub>6</sub> |        |        | y <sup>++</sup> <sub>13</sub> | b <sub>8</sub> | y <sup>++</sup> <sub>14</sub> -H <sub>2</sub> O | y <sup>++</sup> <sub>14</sub> |        | y <sup>++</sup> <sub>15</sub> -H <sub>2</sub> O | y <sup>++</sup> <sub>15</sub> | y <sup>++</sup> <sub>16</sub> | b <sub>9</sub> -H <sub>2</sub> O | b <sub>9</sub> | y <sup>++</sup> <sub>17</sub> | y <sub>9</sub> |
| Delta Da                | 0.46           | 0.49                                            | 0.58                          | -0.51                         | -0.43                           | 0.62           | 0.51                                            | 0.61                          | 0.44                            | 0.37           | 0.45           |        |        | 0.22                          | 0.34           | 0.47                                            | 0.23                          |        | 0.14                                            | 0.26                          | 0.06                          | -0.21                            | -0.05          | 0.51                          | 0.04           |

# Peak 122

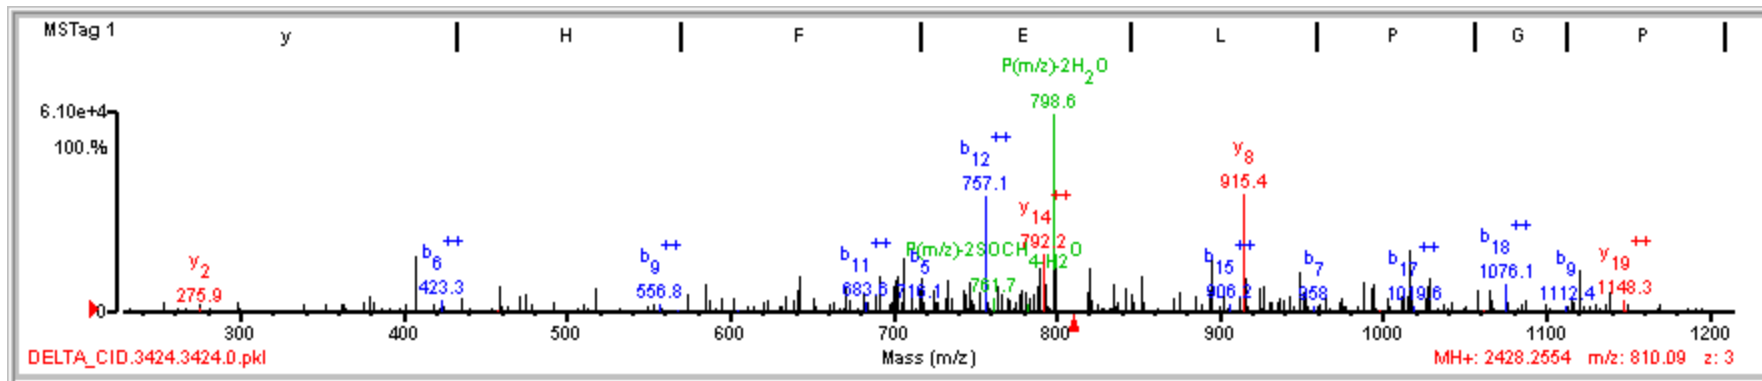

| Rank | Score | SPI (%) | BCS | # Unmatched Ions | Variable sites | Sequence                                                      | MH <sup>+</sup> Calculated (Da) | MH <sup>+</sup> Error (Da)    | MH <sup>+</sup> Error (ppm)    | Protein MW/pl (Da) | Species      | Accession #              | MS-Digest Index #    | Protein Name         |                                                  |                                    |        |                                |                                 |        |        |        |                |        |        |         |                |                                |                                |       |
|------|-------|---------|-----|------------------|----------------|---------------------------------------------------------------|---------------------------------|-------------------------------|--------------------------------|--------------------|--------------|--------------------------|----------------------|----------------------|--------------------------------------------------|------------------------------------|--------|--------------------------------|---------------------------------|--------|--------|--------|----------------|--------|--------|---------|----------------|--------------------------------|--------------------------------|-------|
| 1    | 9.67  | 56.9    | 7   | 10/23            | M384m Y375y    | (K) M G / y H F E / L P G P R m   V / V / T N \ L L \ T R (N) | 2331.21                         | 97.0454                       | 446.5                          | 64914.6/5.42       | Homo sapiens | <a href="#">54607116</a> | <a href="#">3994</a> | leiomodins 3 (fetal) |                                                  |                                    |        |                                |                                 |        |        |        |                |        |        |         |                |                                |                                |       |
|      |       |         |     |                  |                |                                                               | 408.07                          | 643.30                        | 701.34                         | 706.32             | 718.03       | 743.23                   | 747.54               | 757.09               | 777.57                                           | 789.31                             | 792.20 | 799.69                         | 821.14                          | 852.05 | 895.41 | 915.45 | 949.47         | 974.91 | 993.62 | 1016.50 | 1027.98        | 1076.06                        | 1120.75                        |       |
|      |       |         |     |                  |                |                                                               | Frac. Inten. (% of TIC)         | 4.23                          | 2.80                           | 5.58               | 4.04         | 3.39                     | 3.91                 | 3.59                 | 9.37                                             | 0.09                               | 0.17   | 6.33                           | 3.56                            | 4.13   | 4.14   | 3.77   | 12.02          | 2.93   | 3.25   | 4.45    | 6.88           | 4.54                           | 3.74                           | 3.11  |
|      |       |         |     |                  |                |                                                               | Rel. Inten. (% of BP)           | 35.18                         | 23.28                          | 46.37              | 33.57        | 28.17                    | 32.53                | 29.86                | 77.91                                            | 0.76                               | 1.41   | 52.65                          | 29.58                           | 34.39  | 34.47  | 31.35  | 100.00         | 24.37  | 27.00  | 36.98   | 57.22          | 37.79                          | 31.09                          | 25.84 |
|      |       |         |     |                  |                |                                                               | Score                           | 1.00                          | 1.00                           | -0.46              | -0.34        | 1.00                     | -0.33                | 1.00                 | 1.00                                             | 1.50                               | 2.00   | 1.00                           | 0.50                            | -0.34  | -0.34  | -0.31  | 1.00           | -0.24  | -0.27  | -0.37   | -0.57          | 0.25                           | 1.00                           | 1.00  |
|      |       |         |     |                  |                |                                                               | Ion-type                        | y <sup>+++</sup> <sub>7</sub> | b <sup>+++</sup> <sub>18</sub> |                    |              |                          |                      | y <sub>8</sub>       | b <sup>+++</sup> <sub>12</sub> -H <sub>2</sub> O | b <sup>+++</sup> <sub>12</sub> sty | m      | y <sup>+++</sup> <sub>14</sub> | y <sub>7</sub> -NH <sub>3</sub> |        |        |        | y <sub>8</sub> |        |        |         | a <sub>8</sub> | b <sup>+++</sup> <sub>18</sub> | y <sup>+++</sup> <sub>18</sub> |       |
|      |       |         |     |                  |                |                                                               | Delta Da                        | -0.68                         | 0.68                           |                    |              |                          |                      | -0.27                | 0.28                                             | 0.50                               | 0.91   | 0.24                           | 0.22                            |        |        |        | -0.11          |        |        |         | 0.57           | -0.45                          | 0.69                           |       |



# Peak 123

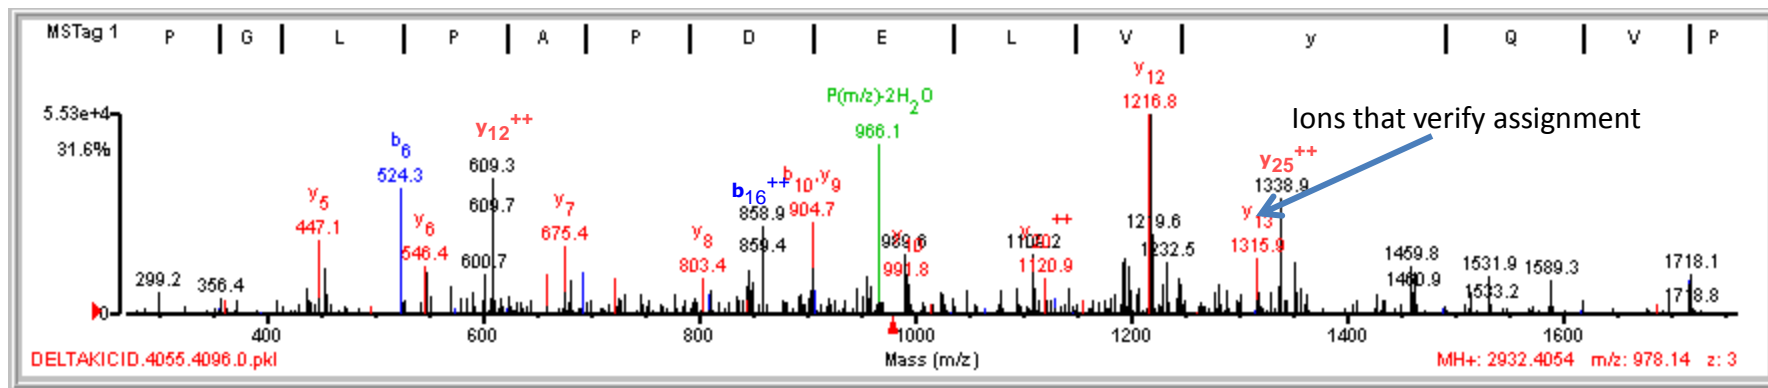

| Rank                   | Score          | SPI (%)                       | BCS            | # Unmatched Ions | Variable sites                | Sequence                                                           | MH <sup>+</sup> Calculated (Da) | MH <sup>+</sup> Error (Da)    | MH <sup>+</sup> Error (ppm) | Protein MW/pi (Da)             | Species      | Accession #     | MS-Digest Index # | Protein Name                                |                 |         |                 |         |                 |         |                               |                               |         |                 |         |
|------------------------|----------------|-------------------------------|----------------|------------------|-------------------------------|--------------------------------------------------------------------|---------------------------------|-------------------------------|-----------------------------|--------------------------------|--------------|-----------------|-------------------|---------------------------------------------|-----------------|---------|-----------------|---------|-----------------|---------|-------------------------------|-------------------------------|---------|-----------------|---------|
| 1                      | 16.40          | 80.3                          | 12             | 8/25             | Y750y                         | (K)A/G K/P G L P A P D E L V Y Q I V I P Q/S/T Q/E/V/S/G A/G R (D) | 2851.46                         | 80.9470                       | 334.4                       | 85035.1/6.77                   | Homo sapiens | 54792129        | 34283             | discoidin, CUB and LCCL domain containing 2 |                 |         |                 |         |                 |         |                               |                               |         |                 |         |
| Fragment-ion (m/z)     | 447.12         | 453.35                        | 524.34         | 546.35           | 608.91                        | 675.40                                                             | 809.28                          | 858.59                        | 904.69                      | 954.35                         | 989.65       | 991.82          | 1109.25           | 1192.59                                     | 1216.78         | 1232.53 | 1245.89         | 1287.63 | 1315.94         | 1336.80 | 1338.87                       | 1351.38                       | 1459.80 | 1715.90         | 1717.53 |
| Frac. Inten.(% of TIC) | 2.12           | 1.81                          | 3.83           | 2.17             | 9.11                          | 2.37                                                               | 1.55                            | 5.30                          | 3.63                        | 1.59                           | 2.22         | 1.71            | 2.04              | 4.04                                        | 33.15           | 2.88    | 1.53            | 1.69    | 2.16            | 1.77    | 3.69                          | 2.38                          | 2.90    | 2.15            | 2.21    |
| Rel. Inten.(% of BP)   | 6.39           | 5.45                          | 11.55          | 6.53             | 27.49                         | 7.14                                                               | 4.67                            | 15.99                         | 10.96                       | 4.80                           | 6.70         | 5.16            | 6.16              | 12.18                                       | 100.00          | 8.69    | 4.63            | 5.08    | 6.52            | 5.33    | 11.12                         | 7.19                          | 8.75    | 6.49            | 6.66    |
| Score                  | 1.00           | 1.00                          | 1.00           | 1.00             | 1.00                          | 1.00                                                               | 1.00                            | 1.00                          | 1.00                        | 1.00                           | -0.07        | 1.00            | -0.06             | -0.12                                       | 1.00            | -0.09   | 1.00            | -0.05   | 1.00            | -0.05   | 1.00                          | 1.00                          | -0.09   | 1.00            | -0.07   |
| Ion-type               | y <sub>5</sub> | b <sup>++</sup> <sub>10</sub> | b <sub>6</sub> | y <sub>6</sub>   | y <sup>++</sup> <sub>12</sub> | b <sub>8</sub> -NH <sub>3</sub>                                    | b <sup>++</sup> <sub>15</sub>   | b <sup>++</sup> <sub>16</sub> | b <sub>10</sub>             | y <sup>+++</sup> <sub>27</sub> |              | y <sub>10</sub> |                   |                                             | y <sub>12</sub> |         | b <sub>13</sub> |         | y <sub>13</sub> |         | y <sup>++</sup> <sub>25</sub> | b <sup>++</sup> <sub>26</sub> |         | b <sub>16</sub> |         |
| Delta Da               | -0.11          | 0.60                          | 0.02           | 0.05             | 0.11                          | 0.02                                                               | 0.39                            | 0.17                          | 0.20                        | 0.22                           |              | 0.34            |                   | 0.19                                        |                 | 0.21    |                 | 0.28    |                 | 0.73    | 0.73                          |                               |         | 0.06            |         |

# Peak 124

Ions that verify assignment

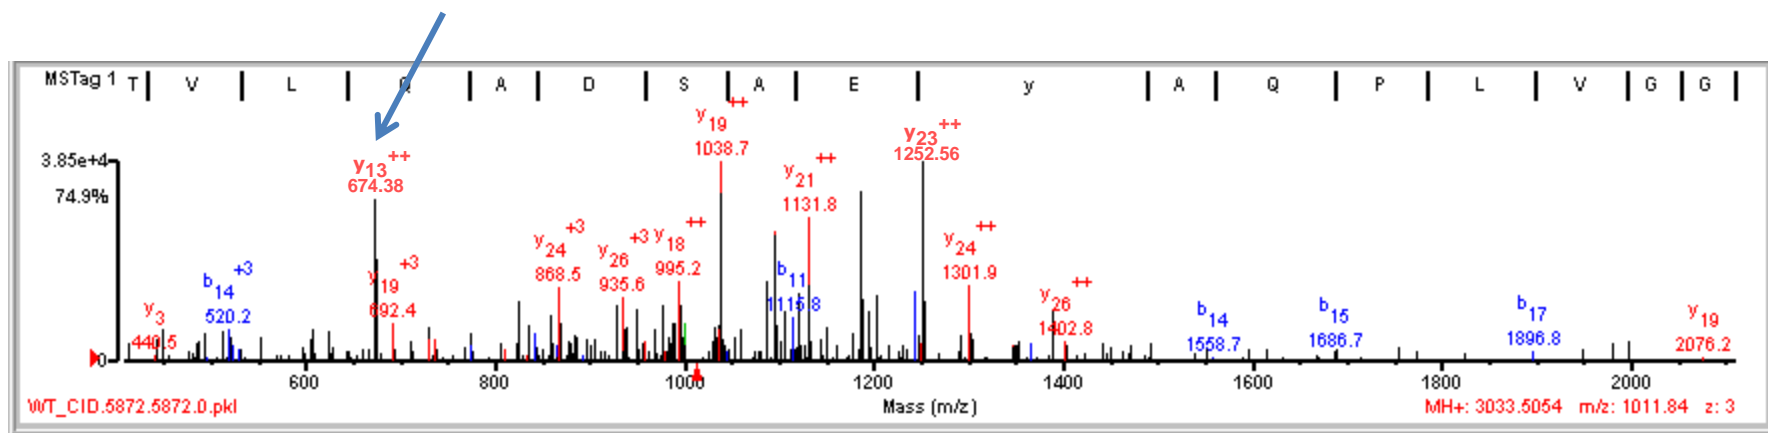

## Related Results

| Rank                    | Score                         | SPI (%)                          | BCS                            | # Unmatched Ions               | Variable sites                 | Sequence                                                        | MH <sup>+</sup> Calculated (Da) | MH <sup>+</sup> Error (Da) | MH <sup>+</sup> Error (ppm)   | Protein MW/pI (Da) | Species                       | Accession #                   | MS-Digest Index #                               | Protein Name                                |         |                 |                               |                               |
|-------------------------|-------------------------------|----------------------------------|--------------------------------|--------------------------------|--------------------------------|-----------------------------------------------------------------|---------------------------------|----------------------------|-------------------------------|--------------------|-------------------------------|-------------------------------|-------------------------------------------------|---------------------------------------------|---------|-----------------|-------------------------------|-------------------------------|
| 1                       | 14.17                         | 94.9                             | 11                             | 2/18                           | Y621y                          | (R) E/V/T T/V/L/Q/A/D/S/A E/V A Q/P L V G G I V G T L H Q R (S) | 2952.54                         | 80.9629                    | 328.5                         | 85035.1/6.77       | Homo sapiens                  | <a href="#">54792129</a>      | <a href="#">34283</a>                           | discoidin, CUB and LCCL domain containing 2 |         |                 |                               |                               |
| Fragment-ion (m/z)      | 674.38                        | 824.70                           | 835.59                         | 868.53                         | 935.62                         | 969.27                                                          | 995.15                          | 1033.53                    | 1038.66                       | 1087.68            | 1096.29                       | 1131.75                       | 1187.11                                         | 1194.93                                     | 1204.01 | 1244.19         | 1252.56                       | 1301.88                       |
| Frac. Inten. (% of TIC) | 8.67                          | 2.78                             | 2.49                           | 3.48                           | 2.27                           | 2.15                                                            | 4.15                            | 2.93                       | 12.80                         | 2.95               | 8.28                          | 7.59                          | 11.11                                           | 3.42                                        | 2.21    | 2.99            | 15.67                         | 4.07                          |
| Rel. Inten. (% of BP)   | 55.34                         | 17.76                            | 15.91                          | 22.24                          | 14.47                          | 13.71                                                           | 26.52                           | 18.69                      | 81.70                         | 18.84              | 52.84                         | 48.48                         | 70.90                                           | 21.82                                       | 14.08   | 19.08           | 100.00                        | 25.96                         |
| Score                   | 1.00                          | 0.50                             | 1.00                           | 1.00                           | 1.00                           | 1.00                                                            | 1.00                            | -0.19                      | 1.00                          | 0.50               | 1.00                          | 1.00                          | 0.50                                            | 1.00                                        | -0.14   | 1.00            | 1.00                          | 1.00                          |
| Ion-type                | y <sup>++</sup> <sub>13</sub> | b <sub>8</sub> -H <sub>2</sub> O | y <sup>+++</sup> <sub>23</sub> | y <sup>+++</sup> <sub>24</sub> | y <sup>+++</sup> <sub>26</sub> | y <sup>+++</sup> <sub>27</sub>                                  | y <sup>+++</sup> <sub>18</sub>  |                            | y <sup>++</sup> <sub>19</sub> | a <sub>11</sub>    | y <sup>++</sup> <sub>20</sub> | y <sup>++</sup> <sub>21</sub> | y <sup>++</sup> <sub>22</sub> -H <sub>2</sub> O | y <sup>++</sup> <sub>22</sub>               |         | b <sub>12</sub> | y <sup>++</sup> <sub>23</sub> | y <sup>++</sup> <sub>24</sub> |
| Delta Da                | 0.48                          | 0.25                             | 0.51                           | 0.42                           | 0.15                           | 0.78                                                            | 0.15                            |                            | 0.14                          | 0.12               | 0.26                          | 0.20                          | 0.54                                            | -0.65                                       |         | -0.41           | 0.44                          | 0.23                          |

# Peak 125

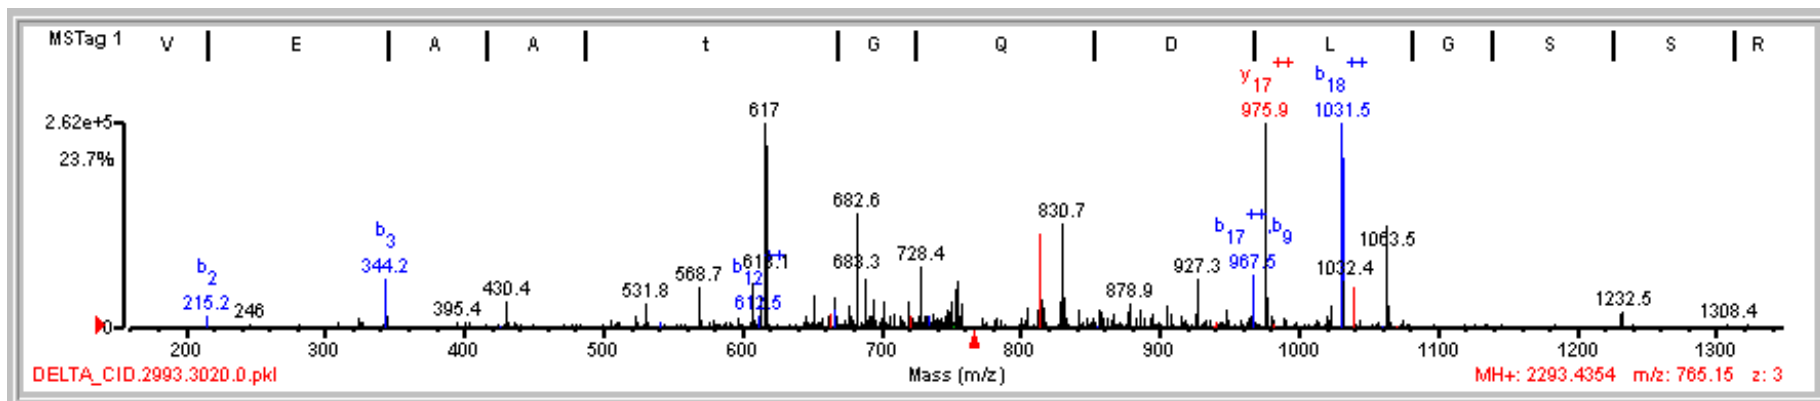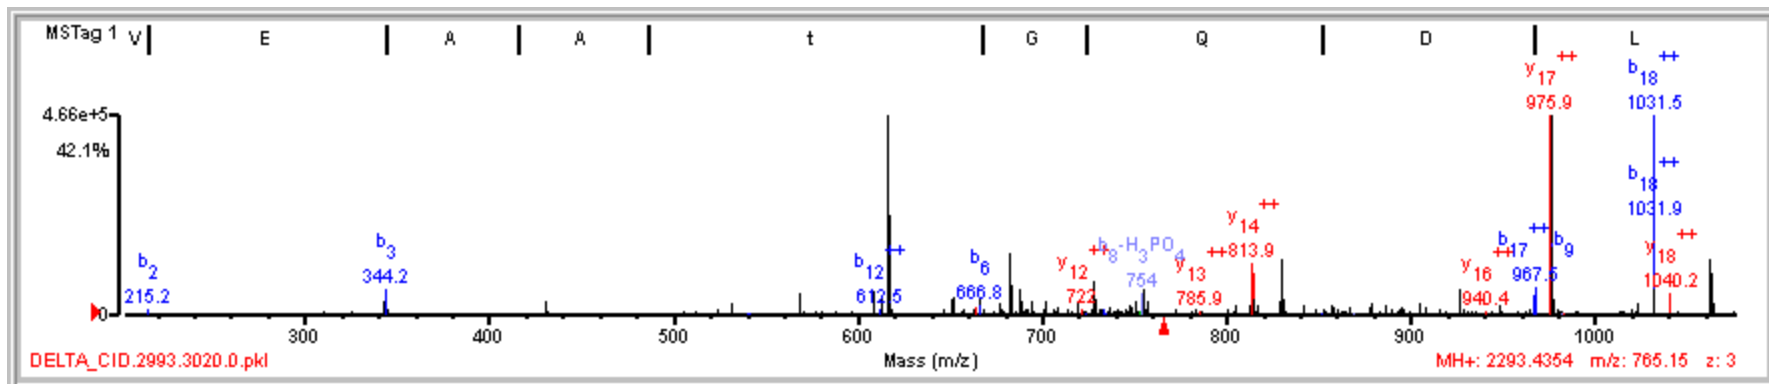

| Rank                   | Score          | SPI (%)                        | # BCS                          | Unmatched Ions                 | Variable sites    | Sequence                                         | MH <sup>+</sup> Calculated (Da) | MH <sup>+</sup> Error (Da) | MH <sup>+</sup> Error (ppm) | Protein MW/pI (Da)             | Species                        | Accession #              | MS-Digest Index #    | Protein Name                   |        |        |        |        |                                                  |                                |                                                  |                                                  |                                |                                   |         |
|------------------------|----------------|--------------------------------|--------------------------------|--------------------------------|-------------------|--------------------------------------------------|---------------------------------|----------------------------|-----------------------------|--------------------------------|--------------------------------|--------------------------|----------------------|--------------------------------|--------|--------|--------|--------|--------------------------------------------------|--------------------------------|--------------------------------------------------|--------------------------------------------------|--------------------------------|-----------------------------------|---------|
| 1                      | 11.88          | 66.0                           | 8                              | 11/25                          | T635t Y644y S645s | (R) D V/E A A t/G Q D\L/G\S\ S R y s G\K\G R (G) | 2053.99                         | 239.4457                   | -197.6                      | 80608.0/5.93                   | Homo sapiens                   | <a href="#">55741663</a> | <a href="#">6927</a> | hypothetical protein LOC57654  |        |        |        |        |                                                  |                                |                                                  |                                                  |                                |                                   |         |
| Fragment-ion (m/z)     | 344.24         | 568.68                         | 608.41                         | 613.25                         | 616.95            | 651.50                                           | 666.34                          | 676.85                     | 682.58                      | 688.30                         | 694.11                         | 728.43                   | 755.52               | 813.93                         | 816.78 | 830.69 | 878.14 | 927.28 | 967.50                                           | 975.86                         | 1022.84                                          | 1031.50                                          | 1040.16                        | 1062.65                           | 1231.29 |
| Frac. Inten.(% of TIC) | 1.29           | 0.89                           | 1.12                           | 0.92                           | 16.14             | 1.32                                             | 1.20                            | 1.06                       | 3.65                        | 1.96                           | 1.81                           | 2.39                     | 1.86                 | 5.06                           | 1.12   | 3.05   | 0.92   | 1.50   | 1.98                                             | 30.33                          | 1.05                                             | 12.68                                            | 1.12                           | 4.47                              | 1.11    |
| Rel. Inten.(% of BP)   | 4.25           | 2.93                           | 3.71                           | 3.04                           | 53.20             | 4.35                                             | 3.94                            | 3.49                       | 12.05                       | 6.45                           | 5.98                           | 7.87                     | 6.14                 | 16.68                          | 3.69   | 10.05  | 3.03   | 4.94   | 6.54                                             | 100.00                         | 3.46                                             | 41.80                                            | 3.70                           | 14.75                             | 3.66    |
| Score                  | 1.00           | 1.00                           | 1.00                           | 1.00                           | -0.53             | 1.00                                             | -0.04                           | -0.03                      | -0.12                       | 1.00                           | 1.00                           | -0.08                    | -0.06                | 1.00                           | -0.04  | -0.10  | -0.03  | -0.05  | 1.00                                             | 1.00                           | 0.50                                             | 1.00                                             | 1.00                           | 0.50                              | -0.04   |
| Ion-type               | b <sub>3</sub> | b <sup>+++</sup> <sub>11</sub> | y <sup>+++</sup> <sub>10</sub> | b <sup>+++</sup> <sub>12</sub> |                   | y <sup>+++</sup> <sub>17</sub>                   |                                 |                            |                             | b <sup>+++</sup> <sub>18</sub> | y <sup>+++</sup> <sub>18</sub> |                          |                      | y <sup>+++</sup> <sub>14</sub> |        |        |        |        | b <sub>9</sub>                                   | y <sup>+++</sup> <sub>17</sub> | b <sup>+++</sup> <sub>18</sub> -H <sub>2</sub> O | b <sup>+++</sup> <sub>18</sub>                   | y <sup>+++</sup> <sub>18</sub> | b <sub>10</sub> -H <sub>2</sub> O |         |
| Delta Da               | 0.09           | -0.55                          | 0.67                           | 0.51                           |                   | 0.58                                             |                                 |                            |                             | 0.04                           | 0.17                           |                          |                      | -0.40                          |        |        |        |        | 0.16                                             | -0.02                          | -0.04                                            | -0.38                                            | -0.24                          | 0.24                              |         |
|                        |                |                                |                                |                                |                   |                                                  |                                 |                            |                             |                                |                                |                          |                      |                                |        |        |        |        | b <sup>+++</sup> <sub>17</sub>                   |                                |                                                  | y <sup>+++</sup> <sub>18</sub> -H <sub>2</sub> O |                                |                                   |         |
|                        |                |                                |                                |                                |                   |                                                  |                                 |                            |                             |                                |                                |                          |                      |                                |        |        |        |        | y <sup>+++</sup> <sub>17</sub> -H <sub>2</sub> O |                                |                                                  | 0.10                                             |                                |                                   |         |
|                        |                |                                |                                |                                |                   |                                                  |                                 |                            |                             |                                |                                |                          |                      |                                |        |        |        |        | 0.63                                             |                                |                                                  |                                                  |                                |                                   |         |

# Peak 127

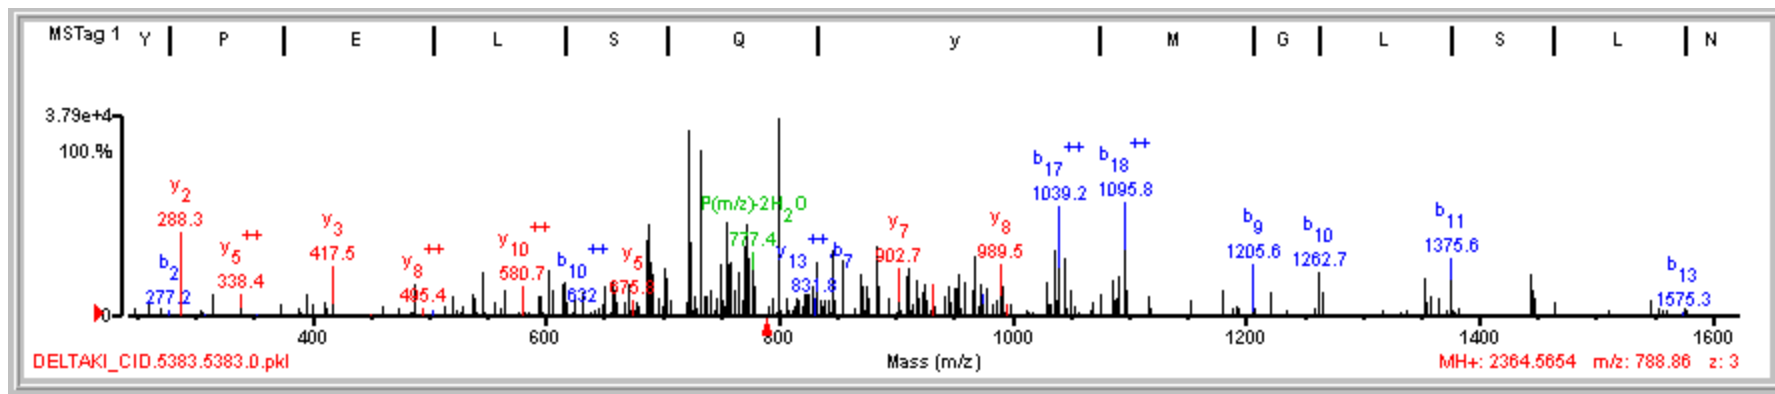

| Rank                    | Score          | SPI (%)                         | BCS    | # Unmatched Ions              | Variable sites | Sequence                                          | MH <sup>+</sup> Calculated (Da) | MH <sup>+</sup> Error (Da) | MH <sup>+</sup> Error (ppm)      | Protein MW/pl (Da)              | Species      | Accession #              | MS-Digest Index #               | Protein Name       |                                |        |        |                |         |                               |                                |                |                 |                 |                                   |
|-------------------------|----------------|---------------------------------|--------|-------------------------------|----------------|---------------------------------------------------|---------------------------------|----------------------------|----------------------------------|---------------------------------|--------------|--------------------------|---------------------------------|--------------------|--------------------------------|--------|--------|----------------|---------|-------------------------------|--------------------------------|----------------|-----------------|-----------------|-----------------------------------|
| 1                       | 11.61          | 62.6                            | 8      | 8/25                          | Y56y           | (R) L Y P E L S Q Y M G L I S / L N E E E I R (A) | 2284.12                         | 80.4489                    | 204.1                            | 32444.6/7.06                    | Homo sapiens | <a href="#">56243522</a> | <a href="#">1509</a>            | syntenin isoform 1 |                                |        |        |                |         |                               |                                |                |                 |                 |                                   |
| 1                       | 11.61          | 62.6                            | 8      | 8/25                          | Y56y           | (R) L Y P E L S Q Y M G L I S / L N E E E I R (A) | 2284.12                         | 80.4489                    | 204.1                            | 32316.4/7.06                    | Homo sapiens | <a href="#">55749515</a> | <a href="#">17431</a>           | syntenin isoform 3 |                                |        |        |                |         |                               |                                |                |                 |                 |                                   |
| 1                       | 11.61          | 62.6                            | 8      | 8/25                          | Y56y           | (R) L Y P E L S Q Y M G L I S / L N E E E I R (A) | 2284.12                         | 80.4489                    | 204.1                            | 32444.6/7.06                    | Homo sapiens | <a href="#">55749490</a> | <a href="#">22158</a>           | syntenin isoform 1 |                                |        |        |                |         |                               |                                |                |                 |                 |                                   |
| 1                       | 11.61          | 62.6                            | 8      | 8/25                          | Y56y           | (R) L Y P E L S Q Y M G L I S / L N E E E I R (A) | 2284.12                         | 80.4489                    | 204.1                            | 32316.4/7.06                    | Homo sapiens | <a href="#">55749523</a> | <a href="#">31735</a>           | syntenin isoform 3 |                                |        |        |                |         |                               |                                |                |                 |                 |                                   |
| 1                       | 11.61          | 62.6                            | 8      | 8/25                          | Y50y           | (R) L Y P E L S Q Y M G L I S / L N E E E I R (A) | 2284.12                         | 80.4489                    | 204.1                            | 31761.8/7.06                    | Homo sapiens | <a href="#">55749504</a> | <a href="#">35433</a>           | syntenin isoform 2 |                                |        |        |                |         |                               |                                |                |                 |                 |                                   |
| Fragment-ion (m/z)      | 288.26         | 657.75                          | 686.35 | 688.85                        | 702.78         | 723.42                                            | 733.05                          | 756.12                     | 771.41                           | 772.74                          | 799.65       | 870.65                   | 884.95                          | 902.66             | 910.60                         | 945.05 | 950.56 | 989.52         | 1037.04 | 1039.23                       | 1095.80                        | 1205.60        | 1262.69         | 1375.61         | 1444.48                           |
| Frac. Inten. (% of TIC) | 2.85           | 2.80                            | 2.60   | 7.34                          | 2.92           | 11.03                                             | 5.98                            | 0.18                       | 2.39                             | 6.11                            | 6.71         | 2.98                     | 3.53                            | 2.36               | 3.02                           | 2.42   | 2.92   | 3.54           | 2.78    | 5.36                          | 7.00                           | 2.28           | 3.16            | 3.94            | 3.79                              |
| Rel. Inten. (% of BP)   | 25.88          | 25.37                           | 23.55  | 66.58                         | 26.52          | 100.00                                            | 54.18                           | 1.59                       | 21.64                            | 55.38                           | 60.80        | 27.06                    | 31.98                           | 21.40              | 27.39                          | 21.98  | 26.48  | 32.05          | 25.24   | 48.63                         | 63.47                          | 20.70          | 28.63           | 35.72           | 34.39                             |
| Score                   | 1.00           | 0.50                            | -0.24  | 1.00                          | 1.00           | -1.00                                             | -0.54                           | 1.50                       | 0.50                             | 0.50                            | -0.61        | -0.27                    | 1.00                            | 1.00               | 1.00                           | -0.22  | -0.26  | 1.00           | -0.25   | 1.00                          | 1.00                           | 1.00           | 1.00            | 1.00            | 0.50                              |
| Ion-type                | y <sub>2</sub> | y <sub>5</sub> -NH <sub>3</sub> |        | b <sup>++</sup> <sub>11</sub> | b <sub>6</sub> |                                                   |                                 | sty                        | y <sub>6</sub> -H <sub>2</sub> O | y <sub>6</sub> -NH <sub>3</sub> |              |                          | y <sub>7</sub> -NH <sub>3</sub> | y <sub>7</sub>     | b <sup>+++</sup> <sub>15</sub> |        |        | y <sub>8</sub> |         | b <sup>++</sup> <sub>17</sub> | b <sup>+++</sup> <sub>18</sub> | b <sub>9</sub> | b <sub>10</sub> | b <sub>11</sub> | b <sub>12</sub> -H <sub>2</sub> O |
| Delta Da                | 0.06           | -0.55                           |        | 0.55                          | -0.59          |                                                   |                                 | 0.08                       | 0.05                             | 0.39                            |              |                          | -0.48                           | 0.20               | 0.70                           |        |        | 0.03           |         | 0.28                          | 0.31                           | 0.11           | 0.17            | 0.01            | -0.14                             |

# Peak 128

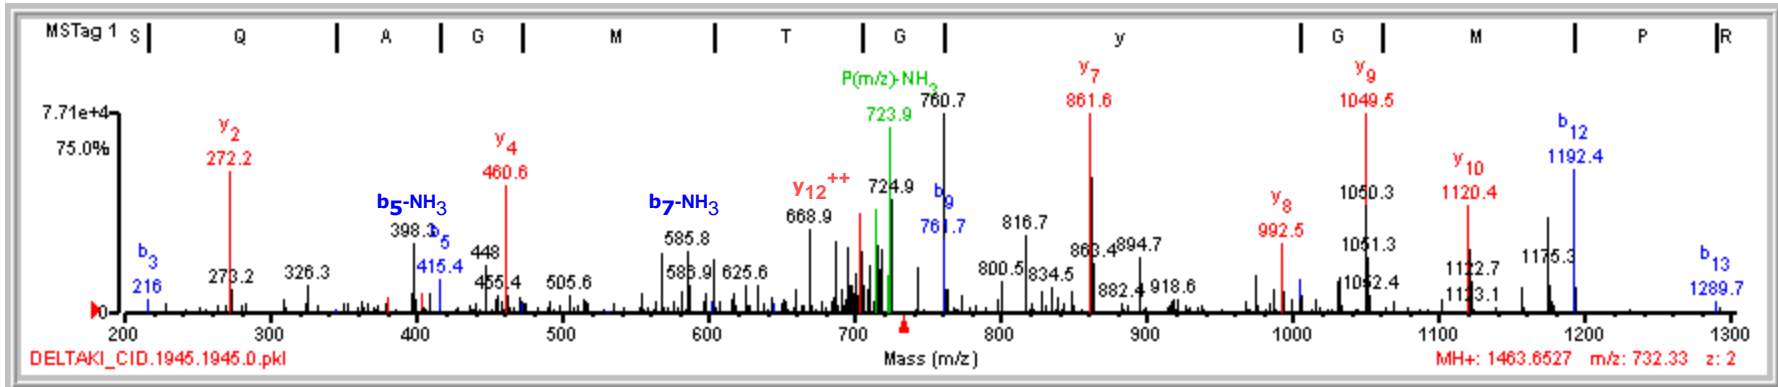

## Detailed Results

| Rank | Score | SPI (%) | BCS | # Unmatched Ions | Variable sites | Sequence                            | MH <sup>+</sup> Calculated (Da) | MH <sup>+</sup> Error (Da) | MH <sup>+</sup> Error (ppm) | Protein MW/pI (Da) | Species      | Accession #              | MS-Digest Index #     | Protein Name |
|------|-------|---------|-----|------------------|----------------|-------------------------------------|---------------------------------|----------------------------|-----------------------------|--------------------|--------------|--------------------------|-----------------------|--------------|
| 1    | 14.40 | 86.5    | 9   | 6/25             | Y192y          | (K) G/A/S Q/A/G/M T G Y G M P R (Q) | 1383.61                         | 80.0383                    | 49.2                        | 22472.8/6.84       | Homo sapiens | <a href="#">56549137</a> | <a href="#">4563</a>  | transgelin 3 |
| 1    | 14.40 | 86.5    | 9   | 6/25             | Y192y          | (K) G/A/S Q/A/G/M T G Y G M P R (Q) | 1383.61                         | 80.0383                    | 49.2                        | 22472.8/6.84       | Homo sapiens | <a href="#">56549135</a> | <a href="#">6272</a>  | transgelin 3 |
| 1    | 14.40 | 86.5    | 9   | 6/25             | Y192y          | (R) G/A/S Q/A/G/M T G Y G M P R (Q) | 1383.61                         | 80.0383                    | 49.2                        | 22391.6/8.41       | Homo sapiens | <a href="#">4507357</a>  | <a href="#">16071</a> | transgelin 2 |
| 1    | 14.40 | 86.5    | 9   | 6/25             | Y192y          | (K) G/A/S Q/A/G/M T G Y G M P R (Q) | 1383.61                         | 80.0383                    | 49.2                        | 22472.8/6.84       | Homo sapiens | <a href="#">56549139</a> | <a href="#">30751</a> | transgelin 3 |

  

| Fragment-ion (m/z)      | 272.18         | 398.32                          | 460.63         | 568.70 | 585.81                          | 603.88         | 668.90                        | 686.78                          | 695.97 | 700.15 | 703.82         | 717.04 | 760.73         | 816.71 | 861.57         | 894.69 | 974.50                           | 986.46                            | 992.54         | 1004.55         | 1031.54                          | 1049.50        | 1120.44         | 1174.56                           | 1192.45         |
|-------------------------|----------------|---------------------------------|----------------|--------|---------------------------------|----------------|-------------------------------|---------------------------------|--------|--------|----------------|--------|----------------|--------|----------------|--------|----------------------------------|-----------------------------------|----------------|-----------------|----------------------------------|----------------|-----------------|-----------------------------------|-----------------|
| Frac. Inten. (% of TIC) | 4.67           | 2.48                            | 3.46           | 1.82   | 2.78                            | 1.67           | 3.29                          | 3.68                            | 2.77   | 1.64   | 6.22           | 3.20   | 9.35           | 2.24   | 12.20          | 1.80   | 2.10                             | 1.46                              | 2.98           | 1.86            | 2.14                             | 10.37          | 5.81            | 5.15                              | 4.86            |
| Rel. Inten. (% of BP)   | 38.27          | 20.36                           | 28.38          | 14.95  | 22.79                           | 13.72          | 26.97                         | 30.13                           | 22.68  | 13.48  | 51.02          | 26.25  | 76.69          | 18.33  | 100.00         | 14.79  | 17.23                            | 11.99                             | 24.47          | 15.22           | 17.54                            | 85.07          | 47.64           | 42.19                             | 39.82           |
| Score                   | 1.00           | 0.50                            | 1.00           | -0.15  | 0.50                            | 1.00           | 1.00                          | 0.50                            | -0.23  | -0.13  | 1.00           | -0.26  | 1.00           | -0.18  | 1.00           | -0.15  | 0.50                             | 0.50                              | 1.00           | 1.00            | 0.50                             | 1.00           | 1.00            | 0.50                              | 1.00            |
| Ion-type                | y <sub>2</sub> | b <sub>5</sub> -NH <sub>3</sub> | y <sub>4</sub> |        | b <sub>7</sub> -NH <sub>3</sub> | b <sub>7</sub> | y <sup>++</sup> <sub>12</sub> | b <sub>8</sub> -NH <sub>3</sub> |        |        | b <sub>8</sub> |        | b <sub>9</sub> |        | y <sub>7</sub> |        | y <sub>8</sub> -H <sub>2</sub> O | b <sub>10</sub> -H <sub>2</sub> O | y <sub>8</sub> | b <sub>10</sub> | y <sub>9</sub> -H <sub>2</sub> O | y <sub>9</sub> | y <sub>10</sub> | b <sub>12</sub> -H <sub>2</sub> O | b <sub>12</sub> |
| Delta Da                | 0.01           | 0.15                            | 0.40           |        | -0.42                           | 0.62           | 0.64                          | -0.50                           |        |        | -0.48          |        | -0.59          |        | 0.24           |        | 0.14                             | 0.12                              | 0.17           | 0.20            | 0.16                             | 0.11           | 0.01            | 0.15                              | 0.03            |

# Peak 129

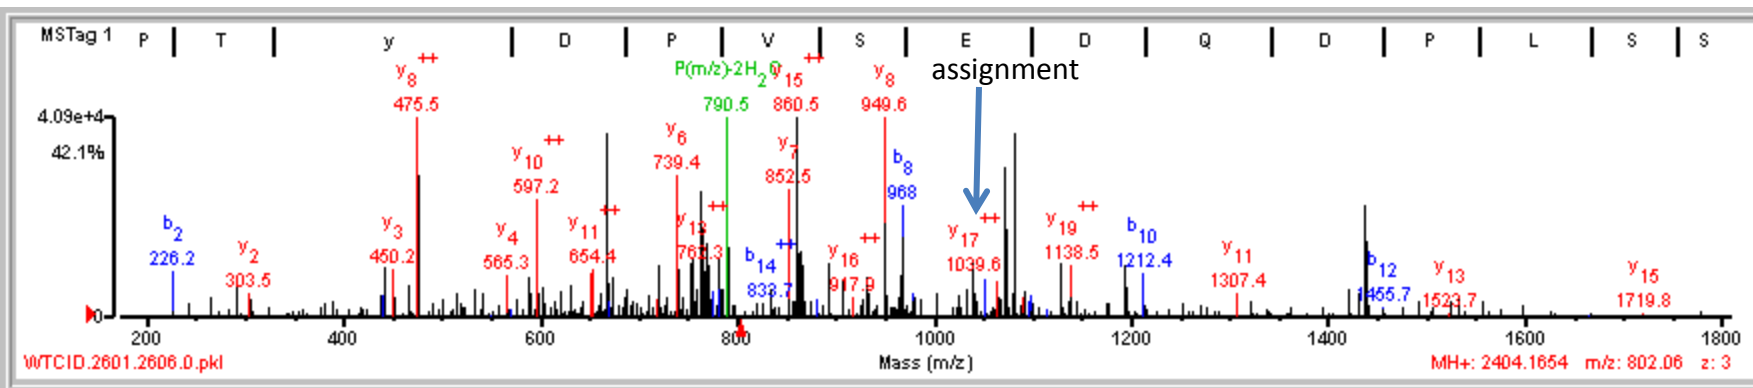

| Rank                    | Score          | SPI (%)                      | BCS                           | # Unmatched Ions                 | Variable sites | Sequence                                                          | MH <sup>+</sup> Calculated (Da) | MH <sup>+</sup> Error (Da)       | MH <sup>+</sup> Error (ppm) | Protein MW/pi (Da) | Species        | Accession #                   | MS-Digest Index # | Protein Name                               |                                 |                |        |                |                               |                |         |         |                                   |                                   |
|-------------------------|----------------|------------------------------|-------------------------------|----------------------------------|----------------|-------------------------------------------------------------------|---------------------------------|----------------------------------|-----------------------------|--------------------|----------------|-------------------------------|-------------------|--------------------------------------------|---------------------------------|----------------|--------|----------------|-------------------------------|----------------|---------|---------|-----------------------------------|-----------------------------------|
| 1                       | 13.91          | 79.4                         | 10                            | 6/24                             | Y518y          | (K) R P T / y D / P V / S E D / Q / D / P / L / S S D / P K R (L) | 2324.10                         | 80.0614                          | 39.5                        | 114569.2/6.85      | Homo sapiens   | 56549666                      | 24052             | tyrosine kinase, non-receptor, 2 isoform 1 |                                 |                |        |                |                               |                |         |         |                                   |                                   |
| Fragment-ion (m/z)      | 450.24         | 475.52                       | 597.23                        | 667.30                           | 739.45         | 754.24                                                            | 762.34                          | 764.03                           | 769.34                      | 781.41             | 852.54         | 860.53                        | 865.47            | 892.27                                     | 932.51                          | 949.58         | 966.75 | 967.98         | 1040.13                       | 1064.81        | 1072.24 | 1081.26 | 1194.38                           | 1437.49                           |
| Frac. Inten. (% of TIC) | 1.87           | 11.75                        | 2.98                          | 6.36                             | 4.39           | 2.16                                                              | 2.73                            | 4.41                             | 0.06                        | 2.00               | 2.84           | 15.43                         | 2.34              | 1.90                                       | 1.84                            | 6.16           | 1.73   | 4.89           | 2.64                          | 1.70           | 5.54    | 7.09    | 2.54                              | 4.63                              |
| Rel. Inten. (% of BP)   | 12.11          | 76.13                        | 19.34                         | 41.24                            | 28.45          | 13.98                                                             | 17.70                           | 28.60                            | 0.38                        | 12.97              | 18.39          | 100.00                        | 15.17             | 12.32                                      | 11.94                           | 39.95          | 11.24  | 31.69          | 17.14                         | 11.05          | 35.90   | 45.94   | 16.48                             | 30.02                             |
| Score                   | 1.00           | 1.00                         | 1.00                          | 0.50                             | 1.00           | 0.25                                                              | 1.00                            | 0.50                             | 1.50                        | -0.13              | 1.00           | 1.00                          | -0.15             | -0.12                                      | 0.50                            | 1.00           | -0.11  | 1.00           | 1.00                          | 1.00           | -0.36   | -0.46   | 0.50                              | 0.50                              |
| Ion-type                | y <sub>3</sub> | y <sup>++</sup> <sub>8</sub> | y <sup>++</sup> <sub>10</sub> | b <sub>5</sub> -H <sub>2</sub> O | y <sub>6</sub> | a <sub>6</sub>                                                    | y <sup>++</sup> <sub>13</sub>   | b <sub>6</sub> -H <sub>2</sub> O | sty                         |                    | y <sub>7</sub> | y <sup>++</sup> <sub>15</sub> |                   |                                            | y <sub>8</sub> -NH <sub>3</sub> | y <sub>8</sub> |        | b <sub>8</sub> | y <sup>++</sup> <sub>17</sub> | y <sub>9</sub> |         |         | b <sub>10</sub> -H <sub>2</sub> O | b <sub>12</sub> -H <sub>2</sub> O |
| Delta Da                | -0.04          | 0.26                         | 0.43                          | 0.05                             | 0.08           | -0.08                                                             | -0.01                           | -0.27                            | -0.03                       |                    | 0.08           | 0.12                          |                   |                                            | 0.03                            | 0.07           |        | -0.43          | 0.69                          | 0.27           |         |         | -0.09                             | -0.07                             |

# Peak 130

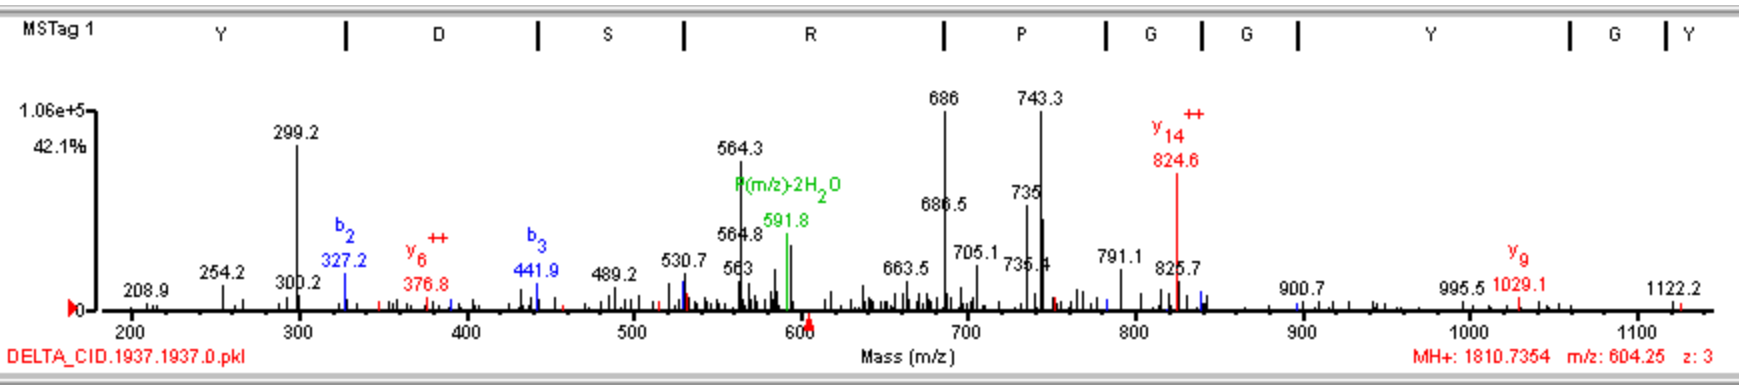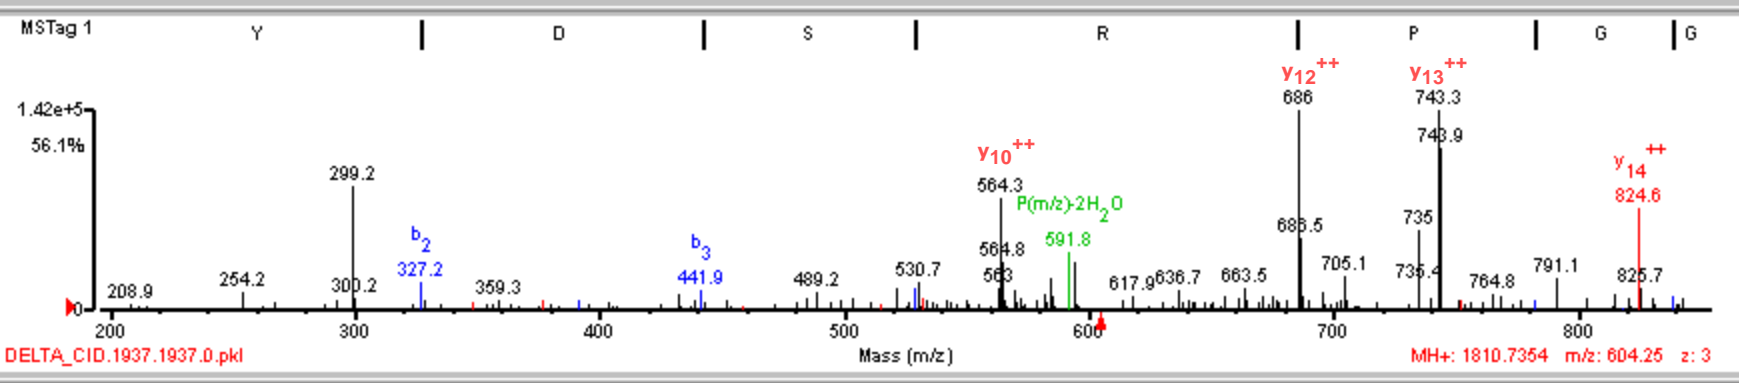

### Detailed Results

| Rank | Score | SPI (%) | BCS | # Unmatched Ions | Variable sites | Sequence                             | MH* Calculated (Da) | MH* Error (Da) | MH* Error (ppm) | Protein MW/pi (Da) | Species      | Accession #             | MS-Digest Index #    | Protein Name                |
|------|-------|---------|-----|------------------|----------------|--------------------------------------|---------------------|----------------|-----------------|--------------------|--------------|-------------------------|----------------------|-----------------------------|
| 1    | 10.77 | 85.6    | 7   | 6/19             | Y129y          | (R)Y/Y D S R P G\G Y\G Y G Y G R (S) | 1730.76             | 79.9797        | 7.4             | 17170.4/8.86       | Homo sapiens | <a href="#">5803137</a> | <a href="#">8158</a> | RNA binding motif protein 3 |

| Fragment-ion (m/z)     | 299.19         | 327.24         | 441.92         | 529.09         | 530.69                        | 564.28                         | 569.67 | 584.55 | 594.00 | 641.13                         | 675.65                                           | 685.97         | 705.06 | 734.97                          | 743.28                         | 751.00 | 791.10 | 824.55                         | 839.14         |
|------------------------|----------------|----------------|----------------|----------------|-------------------------------|--------------------------------|--------|--------|--------|--------------------------------|--------------------------------------------------|----------------|--------|---------------------------------|--------------------------------|--------|--------|--------------------------------|----------------|
| Frac. Inten.(% of TIC) | 7.10           | 2.08           | 1.58           | 1.30           | 1.71                          | 9.05                           | 1.60   | 3.12   | 4.04   | 1.47                           | 1.66                                             | 15.83          | 2.43   | 5.46                            | 30.07                          | 1.52   | 1.65   | 6.87                           | 1.46           |
| Rel. Inten.(% of BP)   | 23.61          | 6.93           | 5.26           | 4.32           | 5.68                          | 30.11                          | 5.34   | 10.36  | 13.45  | 4.87                           | 5.53                                             | 52.64          | 8.07   | 18.16                           | 100.00                         | 5.05   | 5.49   | 22.86                          | 4.85           |
| Score                  | 0.25           | 1.00           | 1.00           | 1.00           | 1.00                          | 1.00                           | -0.05  | -0.10  | -0.13  | 1.00                           | 0.50                                             | 1.00           | -0.08  | 0.50                            | 1.00                           | -0.05  | -0.05  | 1.00                           | 1.00           |
| Ion-type               | a <sub>2</sub> | b <sub>2</sub> | b <sub>3</sub> | b <sub>4</sub> | b <sup>+++</sup> <sub>9</sub> | y <sup>+++</sup> <sub>10</sub> |        |        |        | y <sup>+++</sup> <sub>11</sub> | y <sup>+++</sup> <sub>12</sub> -H <sub>2</sub> O | b <sub>5</sub> |        | y <sub>6</sub> -NH <sub>3</sub> | y <sup>+++</sup> <sub>13</sub> |        |        | y <sup>+++</sup> <sub>14</sub> | b <sub>7</sub> |
| Delta Da               | 0.05           | 0.11           | -0.24          | -0.10          | 0.46                          | 0.56                           |        |        |        | -0.64                          | -0.63                                            | 0.68           |        | -0.28                           | 0.48                           |        |        | 0.22                           | -0.23          |

# Peak 131

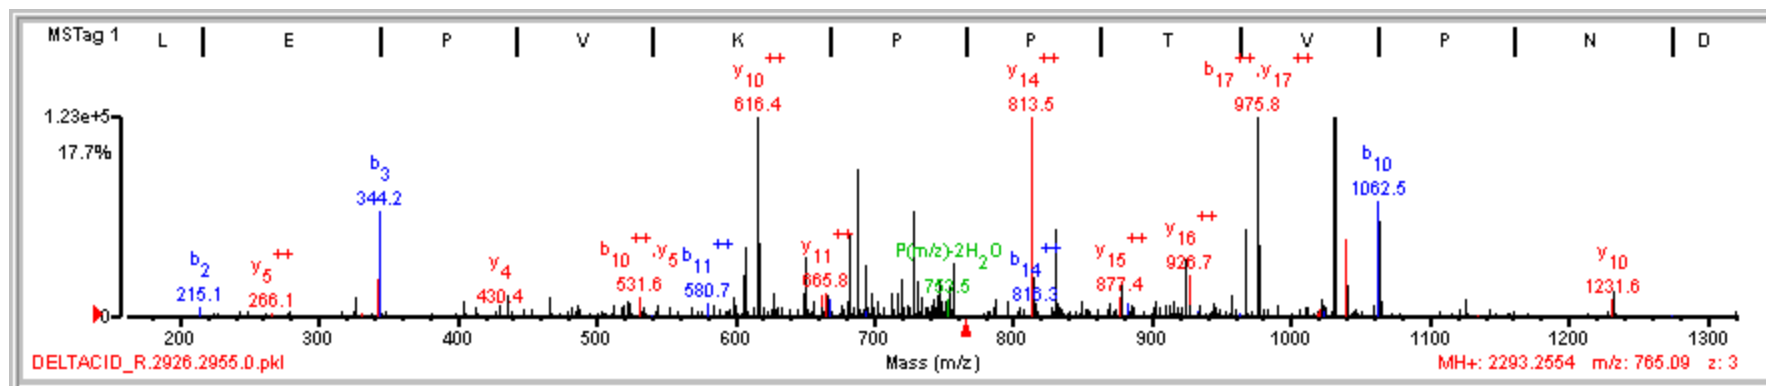

| Rank | Score | SPI (%) | BCS | # Unmatched Ions | Variable sites | Sequence                                              | MH <sup>+</sup> Calculated (Da) | MH <sup>+</sup> Error (Da) | MH <sup>+</sup> Error (ppm) | Protein MW/pl (Da) | Species      | Accession #              | MS-Digest Index #     | Protein Name               |
|------|-------|---------|-----|------------------|----------------|-------------------------------------------------------|---------------------------------|----------------------------|-----------------------------|--------------------|--------------|--------------------------|-----------------------|----------------------------|
| 1    | 13.59 | 85.7    | 9   | 9/25             | Y213y          | (K) T L/E   P/V/R/P P T/V   P N D Y/M T S \ P A R (L) | 2213.13                         | 80.1284                    | 70.7                        | 49376.3/6.81       | Homo sapiens | <a href="#">61743946</a> | <a href="#">4905</a>  | abl-interactor 1 isoform c |
| 1    | 13.59 | 85.7    | 9   | 9/25             | Y208y          | (K) T L/E   P/V/R/P P T/V   P N D Y/M T S \ P A R (L) | 2213.13                         | 80.1284                    | 70.7                        | 51841.2/6.39       | Homo sapiens | <a href="#">61743948</a> | <a href="#">10824</a> | abl-interactor 1 isoform d |
| 1    | 13.59 | 85.7    | 9   | 9/25             | Y213y          | (K) T L/E   P/V/R/P P T/V   P N D Y/M T S \ P A R (L) | 2213.13                         | 80.1284                    | 70.7                        | 52468.0/6.81       | Homo sapiens | <a href="#">61743944</a> | <a href="#">13876</a> | abl-interactor 1 isoform b |
| 1    | 13.59 | 85.7    | 9   | 9/25             | Y213y          | (K) T L/E   P/V/R/P P T/V   P N D Y/M T S \ P A R (L) | 2213.13                         | 80.1284                    | 70.7                        | 55081.1/6.57       | Homo sapiens | <a href="#">61743942</a> | <a href="#">30830</a> | abl-interactor 1 isoform a |

  

| Fragment-ion (m/z)      | 344.23         | 607.61                                          | 616.37                        | 650.92                          | 662.51         | 665.80                        | 682.09 | 687.95 | 693.72                         | 719.51 | 728.38 | 747.97                          | 756.89 | 813.47                        | 830.71 | 877.90                        | 924.46 | 926.74                        | 967.07                                          | 975.81                        | 1022.36 | 1031.47                                         | 1040.21                       | 1062.54         | 1232.71 |
|-------------------------|----------------|-------------------------------------------------|-------------------------------|---------------------------------|----------------|-------------------------------|--------|--------|--------------------------------|--------|--------|---------------------------------|--------|-------------------------------|--------|-------------------------------|--------|-------------------------------|-------------------------------------------------|-------------------------------|---------|-------------------------------------------------|-------------------------------|-----------------|---------|
| Frac. Inten. (% of TIC) | 1.83           | 1.97                                            | 14.12                         | 1.80                            | 0.71           | 0.82                          | 2.40   | 2.73   | 1.27                           | 1.02   | 2.12   | 1.16                            | 0.86   | 5.15                          | 2.25   | 0.89                          | 1.20   | 1.20                          | 2.65                                            | 34.57                         | 0.88    | 11.44                                           | 1.85                          | 4.29            | 0.84    |
| Rel. Inten. (% of BP)   | 5.30           | 5.71                                            | 40.84                         | 5.20                            | 2.05           | 2.37                          | 6.95   | 7.91   | 3.68                           | 2.95   | 6.12   | 3.34                            | 2.48   | 14.91                         | 6.52   | 2.57                          | 3.47   | 3.47                          | 7.66                                            | 100.00                        | 2.53    | 33.11                                           | 5.35                          | 12.41           | 2.43    |
| Score                   | 1.00           | 0.50                                            | 1.00                          | 1.00                            | 1.00           | 1.00                          | -0.07  | -0.08  | 1.00                           | -0.03  | -0.06  | 0.50                            | -0.02  | 1.00                          | -0.07  | 1.00                          | -0.03  | 1.00                          | 0.50                                            | 1.00                          | -0.03   | 0.50                                            | 1.00                          | 1.00            | -0.02   |
| Ion-type                | b <sub>3</sub> | y <sup>++</sup> <sub>10</sub> -H <sub>2</sub> O | y <sup>++</sup> <sub>10</sub> | b <sub>6</sub> -NH <sub>3</sub> | y <sub>6</sub> | y <sup>++</sup> <sub>11</sub> |        |        | y <sup>+++</sup> <sub>18</sub> |        |        | b <sub>7</sub> -NH <sub>3</sub> |        | y <sup>++</sup> <sub>14</sub> |        | y <sup>++</sup> <sub>15</sub> |        | y <sup>++</sup> <sub>16</sub> | b <sup>++</sup> <sub>17</sub> -H <sub>2</sub> O | b <sup>++</sup> <sub>17</sub> |         | y <sup>++</sup> <sub>18</sub> -H <sub>2</sub> O | y <sup>++</sup> <sub>18</sub> | b <sub>10</sub> |         |
| Delta Da                | 0.05           | 0.37                                            | 0.13                          | -0.45                           | 0.18           | 0.02                          |        |        | 0.06                           |        |        | -0.45                           |        | 0.11                          |        | 0.50                          |        | -0.20                         | 0.13                                            | -0.14                         |         | 0.49                                            | 0.23                          | -0.08           |         |
|                         |                |                                                 |                               | y <sup>+++</sup> <sub>17</sub>  |                |                               |        |        |                                |        |        |                                 |        |                               |        |                               |        |                               | y <sup>++</sup> <sub>17</sub> -H <sub>2</sub> O | y <sup>++</sup> <sub>17</sub> |         |                                                 |                               |                 |         |



# Peak 132

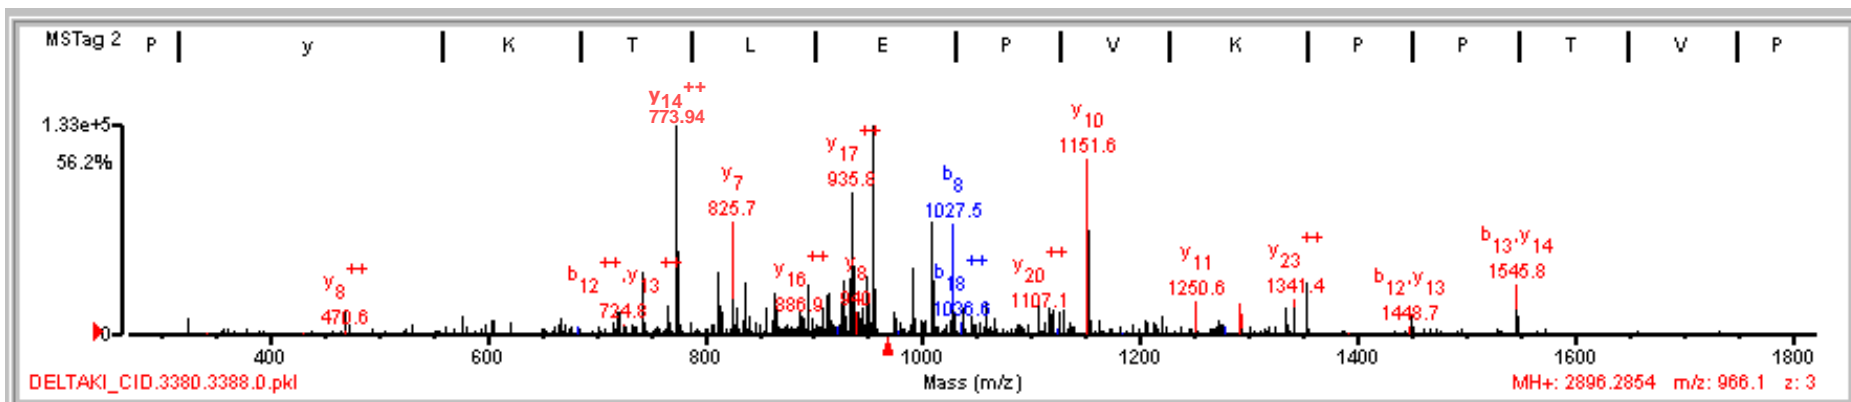

| Rank                    | Score  | SPI (%) | BCS                           | # Unmatched Ions | # Variable sites              | Sequence                                                      | MH <sup>+</sup> Calculated (Da) | MH <sup>+</sup> Error (Da)     | MH <sup>+</sup> Error (ppm)                      | Protein MW/pI (Da)             | Species                        | Accession #                    | MS-Digest Index #    | Protein Name               |        |        |        |                                  |                |                 |                               |                               |         |                 |
|-------------------------|--------|---------|-------------------------------|------------------|-------------------------------|---------------------------------------------------------------|---------------------------------|--------------------------------|--------------------------------------------------|--------------------------------|--------------------------------|--------------------------------|----------------------|----------------------------|--------|--------|--------|----------------------------------|----------------|-----------------|-------------------------------|-------------------------------|---------|-----------------|
| 1                       | 11.68  | 75.0    | 8                             | 10/24            | Y198y                         | (R) N/T/P/y K T L E   P V/K/P P   T V/P N D/Y M T S P A R (L) | 2816.43                         | 79.8567                        | -37.9                                            | 49376.3/6.81                   | Homo sapiens                   | <a href="#">61743946</a>       | <a href="#">4905</a> | abl-interactor 1 isoform c |        |        |        |                                  |                |                 |                               |                               |         |                 |
| Fragment-ion (m/z)      | 743.96 | 766.52  | 773.94                        | 812.66           | 825.68                        | 837.94                                                        | 864.66                          | 894.86                         | 927.01                                           | 928.26                         | 935.77                         | 936.06                         | 941.68               | 945.86                     | 948.58 | 949.46 | 991.49 | 1009.47                          | 1027.49        | 1151.62         | 1292.32                       | 1341.41                       | 1352.74 | 1545.75         |
| Frac. Inten. (% of TIC) | 3.03   | 1.80    | 19.00                         | 2.90             | 4.52                          | 2.57                                                          | 3.62                            | 2.66                           | 1.84                                             | 2.62                           | 3.77                           | 9.82                           | 1.70                 | 1.94                       | 1.94   | 3.30   | 2.00   | 4.91                             | 5.12           | 9.93            | 1.62                          | 2.31                          | 2.78    | 4.30            |
| Rel. Inten. (% of BP)   | 15.94  | 9.50    | 100.00                        | 15.27            | 23.79                         | 13.54                                                         | 19.05                           | 13.99                          | 9.70                                             | 13.81                          | 19.86                          | 51.68                          | 8.92                 | 10.19                      | 10.21  | 17.35  | 10.52  | 25.84                            | 26.97          | 52.28           | 8.51                          | 12.16                         | 14.61   | 22.61           |
| Score                   | -0.16  | -0.09   | 1.00                          | -0.15            | 1.00                          | 1.00                                                          | -0.19                           | 1.00                           | 0.50                                             | 1.00                           | 1.00                           | 1.00                           | -0.09                | -0.10                      | -0.10  | -0.17  | -0.11  | 0.50                             | 1.00           | 1.00            | 1.00                          | 1.00                          | -0.15   | 1.00            |
| Ion-type                |        |         | b <sup>++</sup> <sub>13</sub> | y <sub>7</sub>   | y <sup>++</sup> <sub>15</sub> | y <sup>+++</sup> <sub>23</sub>                                | y <sup>+++</sup> <sub>23</sub>  | y <sup>+++</sup> <sub>23</sub> | y <sup>+++</sup> <sub>17</sub> -H <sub>2</sub> O | y <sup>+++</sup> <sub>24</sub> | y <sup>+++</sup> <sub>17</sub> | y <sup>+++</sup> <sub>17</sub> |                      |                            |        |        |        | b <sub>8</sub> -H <sub>2</sub> O | b <sub>8</sub> | y <sub>10</sub> | y <sup>++</sup> <sub>22</sub> | y <sup>++</sup> <sub>23</sub> |         | b <sub>13</sub> |
| Delta Da                |        |         | 0.55                          | 0.29             | 0.52                          |                                                               |                                 | 0.42                           | 0.54                                             | 0.14                           | 0.29                           | 0.58                           |                      |                            |        |        |        | 0.03                             | 0.04           | 0.11            | -0.31                         | 0.25                          |         | -0.02           |
|                         |        |         | 0.57                          |                  |                               |                                                               |                                 |                                |                                                  |                                |                                |                                |                      |                            |        |        |        |                                  |                | 0.11            |                               |                               |         | 0.01            |



# Peak 134

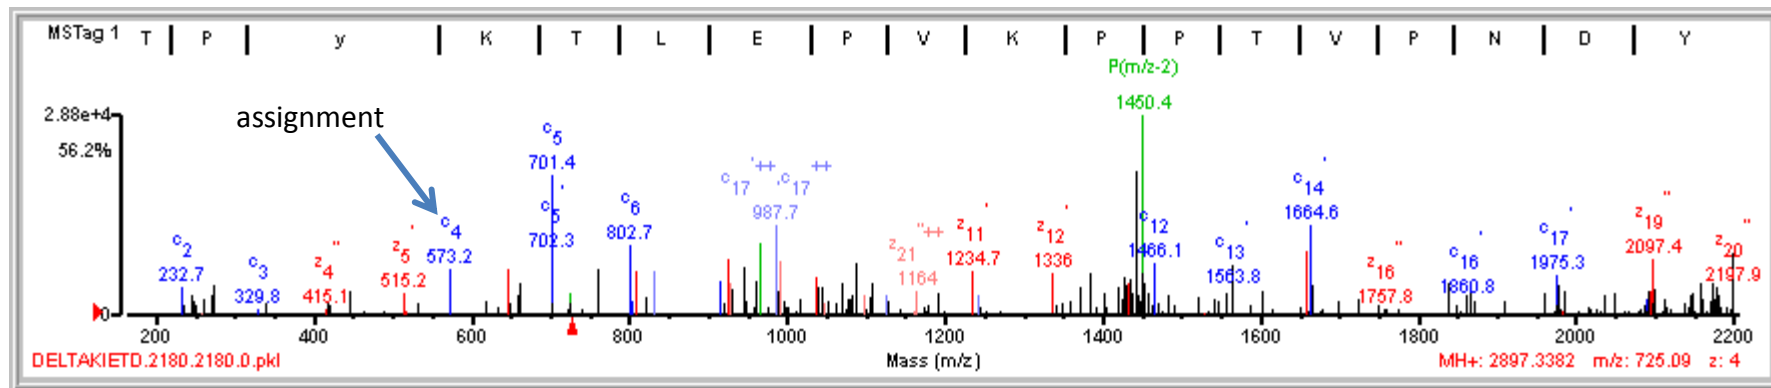

|                        |        |                |                 |                |                |                                                                   |                               |                |                 |                               |                               |                          |                       |                            |                  |                  |         |         |                               |                  |                  |                  |                               |         |         |
|------------------------|--------|----------------|-----------------|----------------|----------------|-------------------------------------------------------------------|-------------------------------|----------------|-----------------|-------------------------------|-------------------------------|--------------------------|-----------------------|----------------------------|------------------|------------------|---------|---------|-------------------------------|------------------|------------------|------------------|-------------------------------|---------|---------|
| 1                      | 12.27  | 77.1           | 11              | 7/25           | Y198y          | (R) N T P y \ K T L E P V / K P P T V P I N D Y / M T S P A R (L) | 2816.43                       | 80.9094        | 325.5           | 49376.3/6.81                  | Homo sapiens                  | <a href="#">61743946</a> | <a href="#">4905</a>  | abl-interactor 1 isoform c |                  |                  |         |         |                               |                  |                  |                  |                               |         |         |
| 1                      | 12.27  | 77.1           | 11              | 7/25           | Y193y          | (R) N T P y \ K T L E P V / K P P T V P I N D Y / M T S P A R (L) | 2816.43                       | 80.9094        | 325.5           | 51841.2/6.39                  | Homo sapiens                  | <a href="#">61743948</a> | <a href="#">10824</a> | abl-interactor 1 isoform d |                  |                  |         |         |                               |                  |                  |                  |                               |         |         |
| Fragment-ion (m/z)     | 271.94 | 573.22         | 646.26          | 701.38         | 802.66         | 809.49                                                            | 832.51                        | 915.47         | 924.68          | 987.70                        | 992.45                        | 1038.24                  | 1069.44               | 1087.03                    | 1234.71          | 1335.99          | 1466.11 | 1565.07 | 1659.09                       | 1664.58          | 1860.83          | 1975.29          | 2097.38                       | 2179.53 | 2199.60 |
| Frac. Inten.(% of TIC) | 3.02   | 2.92           | 2.78            | 11.58          | 4.67           | 3.22                                                              | 3.72                          | 2.76           | 3.69            | 6.14                          | 2.95                          | 3.76                     | 3.08                  | 2.82                       | 3.70             | 2.72             | 3.54    | 3.88    | 3.76                          | 8.21             | 2.76             | 2.83             | 4.90                          | 2.74    | 3.85    |
| Rel. Inten.(% of BP)   | 26.06  | 25.25          | 24.01           | 100.00         | 40.30          | 27.82                                                             | 32.16                         | 23.87          | 31.84           | 53.00                         | 25.50                         | 32.43                    | 26.61                 | 24.39                      | 31.95            | 23.52            | 30.58   | 33.47   | 32.44                         | 70.89            | 23.84            | 24.44            | 42.34                         | 23.63   | 33.28   |
| Score                  | -0.26  | 1.00           | 1.00            | 1.00           | 1.00           | 1.00                                                              | 1.00                          | 1.00           | 1.00            | 1.00                          | 1.00                          | 1.00                     | -0.27                 | -0.24                      | 1.00             | 1.00             | -0.31   | -0.33   | 0.25                          | 0.25             | 0.25             | 0.25             | 0.25                          | -0.24   | -0.33   |
| Ion-type               |        | c <sub>4</sub> | z' <sub>6</sub> | c <sub>5</sub> | c <sub>6</sub> | z' <sub>7</sub>                                                   | c <sup>++</sup> <sub>14</sub> | c <sub>7</sub> | z' <sub>8</sub> | c <sup>++</sup> <sub>17</sub> | z <sup>++</sup> <sub>18</sub> | z' <sub>9</sub>          |                       |                            | z' <sub>11</sub> | z' <sub>12</sub> |         |         | z <sup>''</sup> <sub>15</sub> | c' <sub>14</sub> | c' <sub>16</sub> | c' <sub>17</sub> | z <sup>''</sup> <sub>19</sub> |         |         |
| Delta Da               |        | 0.01           | -0.05           | 0.08           | 0.31           | 0.12                                                              | 0.08                          | 0.04           | 0.28            | 0.19                          | 0.46                          | -0.20                    |                       |                            | 0.15             | 0.38             |         |         | 0.27                          | -0.27            | -0.14            | 0.27             | 0.31                          |         |         |

# Peak 136

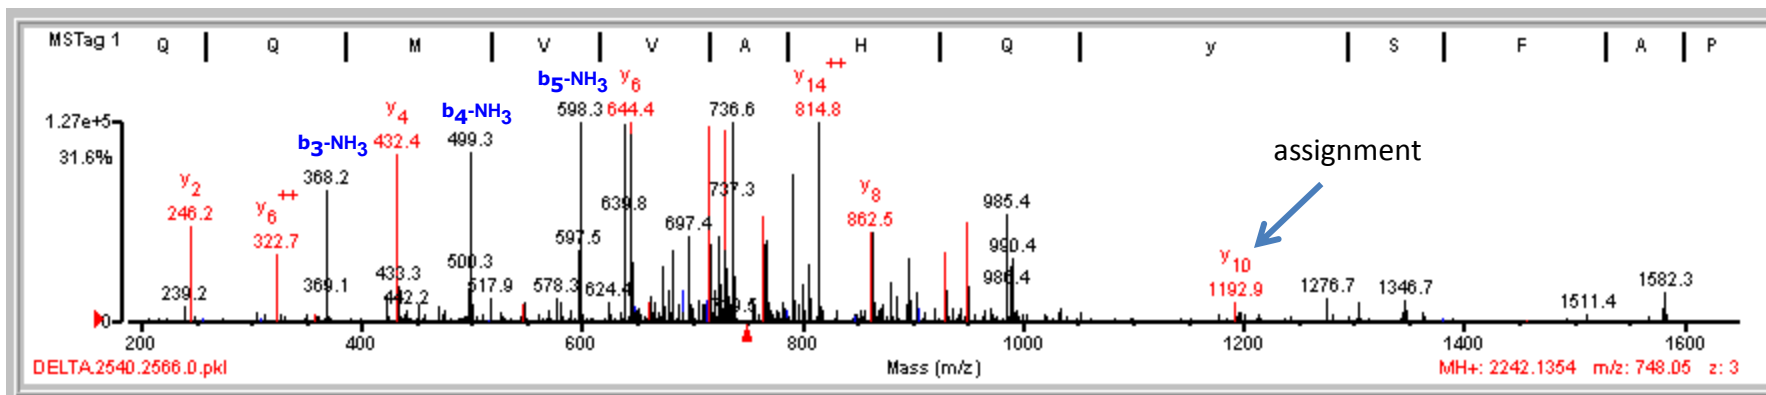

## Detailed Results

| Rank                    | Score          | SPI (%)                         | BCS                            | # Unmatched Ions                | Variable sites                  | Sequence                                      | MH <sup>+</sup> Calculated (Da) | MH <sup>+</sup> Error (Da) | MH <sup>+</sup> Error (ppm) | Protein MW/pI (Da) | Species      | Accession #                   | MS-Digest Index #             | Protein Name                    |        |                                                 |                               |                               |                |                               |        |                               |                |        |        |
|-------------------------|----------------|---------------------------------|--------------------------------|---------------------------------|---------------------------------|-----------------------------------------------|---------------------------------|----------------------------|-----------------------------|--------------------|--------------|-------------------------------|-------------------------------|---------------------------------|--------|-------------------------------------------------|-------------------------------|-------------------------------|----------------|-------------------------------|--------|-------------------------------|----------------|--------|--------|
| 1                       | 14.35          | 74.6                            | 10                             | 8/25                            | Y601y                           | (R) Q Q Q/M/V/V/A/H Q Y S/E/A/P D/G E/A R (L) | 2162.01                         | 80.1271                    | 71.7                        | 155266.4/6.34      | Homo sapiens | <a href="#">65288071</a>      | <a href="#">34866</a>         | tensin 3                        |        |                                                 |                               |                               |                |                               |        |                               |                |        |        |
| Fragment-ion (m/z)      | 246.15         | 368.19                          | 432.37                         | 499.32                          | 598.32                          | 638.95                                        | 644.41                          | 682.28                     | 696.55                      | 715.47             | 724.70       | 729.33                        | 765.16                        | 768.49                          | 791.54 | 805.96                                          | 814.46                        | 814.78                        | 862.50         | 863.89                        | 897.03 | 929.77                        | 949.57         | 985.37 | 990.44 |
| Frac. Inten. (% of TIC) | 1.68           | 2.93                            | 3.62                           | 3.97                            | 4.94                            | 5.17                                          | 15.38                           | 2.04                       | 2.89                        | 0.15               | 2.31         | 6.59                          | 4.63                          | 2.44                            | 4.61   | 1.89                                            | 2.57                          | 12.21                         | 1.52           | 4.67                          | 2.53   | 2.45                          | 3.00           | 3.74   | 2.06   |
| Rel. Inten. (% of BP)   | 10.95          | 19.05                           | 23.53                          | 25.82                           | 32.10                           | 33.63                                         | 100.00                          | 13.29                      | 18.77                       | 0.97               | 15.01        | 42.83                         | 30.08                         | 15.88                           | 29.97  | 12.29                                           | 16.73                         | 79.40                         | 9.89           | 30.38                         | 16.46  | 15.93                         | 19.53          | 24.33  | 13.42  |
| Score                   | 1.00           | 0.50                            | 1.00                           | 0.50                            | 0.50                            | -0.34                                         | 1.00                            | -0.13                      | -0.19                       | 1.50               | -0.15        | 1.00                          | 1.00                          | 0.50                            | -0.30  | 0.50                                            | 1.00                          | 1.00                          | 1.00           | 1.00                          | -0.16  | 1.00                          | 1.00           | -0.24  | -0.13  |
| Ion-type                | y <sub>2</sub> | b <sub>3</sub> -NH <sub>3</sub> | b <sup>+++</sup> <sub>10</sub> | b <sub>4</sub> -NH <sub>3</sub> | b <sub>5</sub> -NH <sub>3</sub> |                                               | y <sub>6</sub>                  |                            |                             | y <sub>7</sub>     |              | y <sup>++</sup> <sub>12</sub> | y <sup>++</sup> <sub>13</sub> | b <sub>7</sub> -NH <sub>3</sub> |        | y <sup>++</sup> <sub>14</sub> -H <sub>2</sub> O | y <sup>++</sup> <sub>14</sub> | y <sup>++</sup> <sub>14</sub> | y <sub>8</sub> | y <sup>++</sup> <sub>15</sub> |        | y <sup>++</sup> <sub>16</sub> | y <sub>9</sub> |        |        |
| Delta Da                | -0.01          | 0.03                            |                                | 0.52                            | 0.12                            | 0.05                                          | 0.11                            |                            |                             | 0.13               |              | 0.03                          | 0.35                          | 0.12                            |        | 0.62                                            | 0.11                          | 0.43                          | 0.09           | 0.01                          |        | 0.37                          | 0.13           |        |        |

# Peak 137

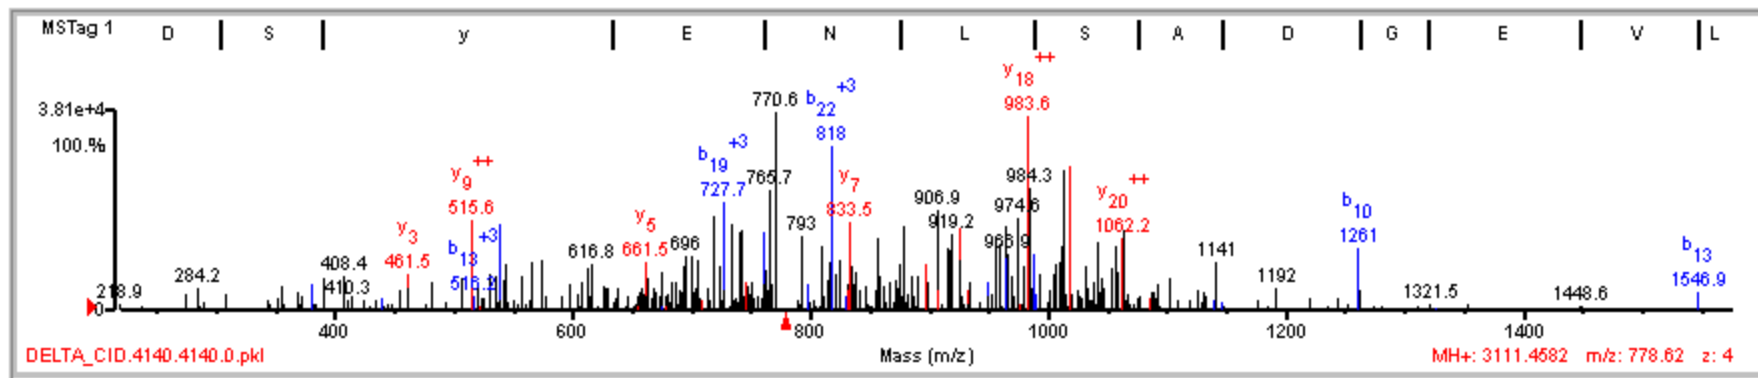

| Rank                    | Score                        | SPI (%)                      | BCS            | # Unmatched Ions                | Variable sites | Sequence                                                          | MH* Calculated (Da) | MH* Error (Da)                   | MH* Error (ppm) | Protein MW/pI (Da) | Species                        | Accession #              | MS-Digest Index #                | Protein Name |                                 |                               |        |        |                                                 |                               |                                  |                                |                               |                                  |                               |
|-------------------------|------------------------------|------------------------------|----------------|---------------------------------|----------------|-------------------------------------------------------------------|---------------------|----------------------------------|-----------------|--------------------|--------------------------------|--------------------------|----------------------------------|--------------|---------------------------------|-------------------------------|--------|--------|-------------------------------------------------|-------------------------------|----------------------------------|--------------------------------|-------------------------------|----------------------------------|-------------------------------|
| 1                       | 14.31                        | 78.7                         | 11             | 5/25                            | Y354y S332s    | (R)W D s Y E N L/S I A/D/G E/V L H T Q\G/P\ V/D/G I S L Y A K (V) | 2951.37             | 160.0888                         | 50.2            | 155266.4/6.34      | Homo sapiens                   | <a href="#">65288071</a> | <a href="#">34866</a>            | tensin 3     |                                 |                               |        |        |                                                 |                               |                                  |                                |                               |                                  |                               |
| Fragment-ion (m/z)      | 515.60                       | 538.54                       | 661.51         | 701.05                          | 718.84         | 727.74                                                            | 734.04              | 743.30                           | 761.36          | 765.66             | 818.03                         | 833.49                   | 857.33                           | 906.88       | 915.51                          | 926.06                        | 959.55 | 964.42 | 974.55                                          | 983.62                        | 1010.95                          | 1013.96                        | 1019.36                       | 1057.36                          | 1062.25                       |
| Frac. Inten. (% of TIC) | 2.85                         | 2.75                         | 2.68           | 2.65                            | 3.61           | 3.51                                                              | 2.83                | 2.77                             | 4.56            | 5.21               | 4.43                           | 4.63                     | 3.75                             | 4.75         | 4.66                            | 4.01                          | 2.70   | 5.77   | 3.62                                            | 9.72                          | 2.83                             | 4.42                           | 4.36                          | 2.81                             | 4.12                          |
| Rel. Inten. (% of BP)   | 29.33                        | 28.31                        | 27.58          | 27.23                           | 37.11          | 36.10                                                             | 29.14               | 28.47                            | 46.93           | 53.60              | 45.56                          | 47.67                    | 38.63                            | 48.93        | 47.93                           | 41.24                         | 27.75  | 59.38  | 37.25                                           | 100.00                        | 29.16                            | 45.51                          | 44.88                         | 28.91                            | 42.43                         |
| Score                   | 1.00                         | 1.00                         | 1.00           | 0.50                            | 1.00           | 1.00                                                              | -0.29               | 0.50                             | 1.00            | -0.54              | 1.00                           | 1.00                     | 0.50                             | -0.49        | 0.50                            | 1.00                          | -0.28  | -0.59  | 0.50                                            | 1.00                          | 0.50                             | 1.00                           | 1.00                          | 0.50                             | 1.00                          |
| Ion-type                | y <sup>++</sup> <sub>9</sub> | b <sup>++</sup> <sub>8</sub> | y <sub>5</sub> | y <sub>6</sub> -NH <sub>3</sub> | y <sub>6</sub> | b <sup>+++</sup> <sub>19</sub>                                    |                     | b <sub>5</sub> -H <sub>2</sub> O | b <sub>5</sub>  |                    | b <sup>+++</sup> <sub>22</sub> | y <sub>7</sub>           | b <sub>6</sub> -H <sub>2</sub> O |              | y <sub>3</sub> -NH <sub>3</sub> | y <sup>++</sup> <sub>17</sub> |        |        | y <sup>++</sup> <sub>18</sub> -H <sub>2</sub> O | y <sup>++</sup> <sub>18</sub> | y <sub>5</sub> -H <sub>2</sub> O | b <sup>+++</sup> <sub>17</sub> | y <sup>++</sup> <sub>19</sub> | b <sub>3</sub> -H <sub>2</sub> O | y <sup>++</sup> <sub>20</sub> |
| Delta Da                | 0.36                         | 0.35                         | 0.21           | -0.24                           | 0.52           | 0.44                                                              |                     | 0.09                             | 0.14            |                    | 0.35                           | 0.15                     | 0.08                             |              | 0.12                            | 0.12                          |        |        | 0.10                                            | 0.17                          | -0.50                            | 0.55                           | 0.39                          | -0.01                            | -0.24                         |

# Peak 139

Ions that verify assignment

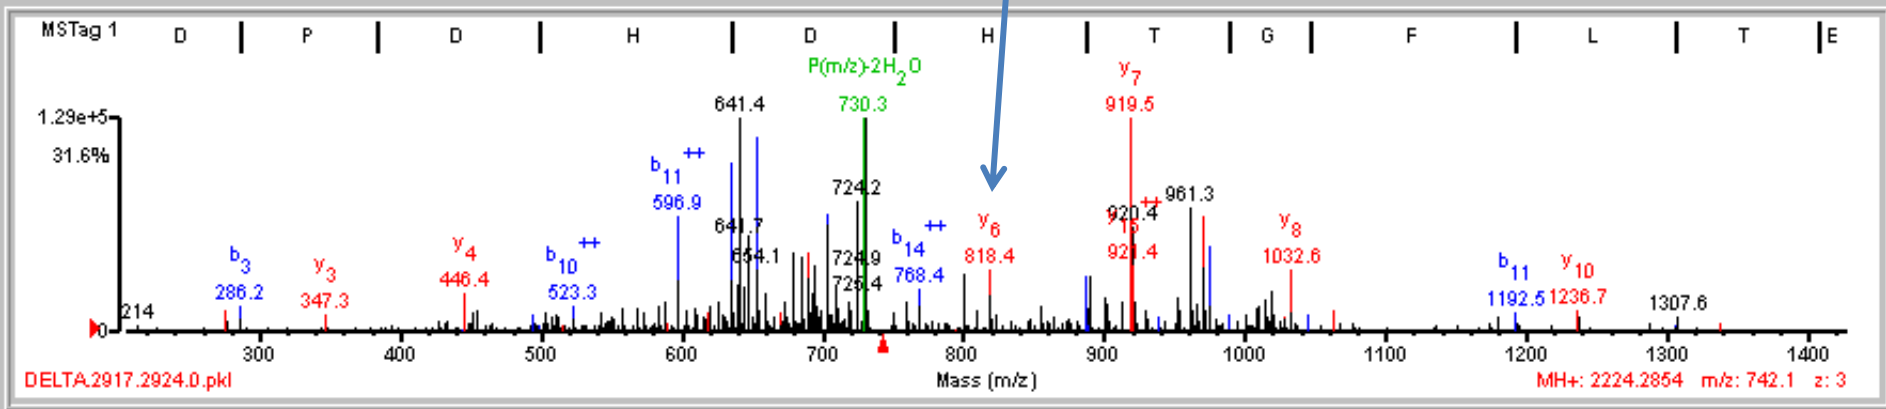

| Rank | Score | SPI (%) | BCS | # Unmatched ions | Variable sites | Sequence                                             | MH <sup>+</sup> Calculated (Da) | MH <sup>+</sup> Error (Da) | MH <sup>+</sup> Error (ppm) | Protein MW/pI (Da) | Species      | Accession #              | MS-Digest Index #     | Protein Name                       |
|------|-------|---------|-----|------------------|----------------|------------------------------------------------------|---------------------------------|----------------------------|-----------------------------|--------------------|--------------|--------------------------|-----------------------|------------------------------------|
| 1    | 16.99 | 80.9    | 10  | 4/25             | Y187y          | (R) V A/D/P D H\ D H\ T G F  L  T  E/y\ V A\ T R (W) | 2144.00                         | 80.2811                    | 141.5                       | 41389.9/6.50       | Homo sapiens | <a href="#">66932916</a> | <a href="#">20787</a> | mitogen-activated protein kinase 1 |
| 1    | 16.99 | 80.9    | 10  | 4/25             | Y187y          | (R) V A/D/P D H\ D H\ T G F  L  T  E/y\ V A\ T R (W) | 2144.00                         | 80.2811                    | 141.5                       | 41389.9/6.50       | Homo sapiens | <a href="#">20986531</a> | <a href="#">21374</a> | mitogen-activated protein kinase 1 |

  

| Fragment-ion (m/z)      | 587.90                                          | 596.93                        | 635.40         | 641.35 | 644.35                                          | 647.14                         | 653.57                        | 679.91 | 685.52                         | 689.49         | 694.96                                          | 703.74                        | 710.00 | 724.25 | 800.40                           | 818.40         | 887.40         | 890.35                        | 901.46                           | 919.50         | 952.43 | 961.30                                          | 970.13                           | 975.05                        | 1032.57        |
|-------------------------|-------------------------------------------------|-------------------------------|----------------|--------|-------------------------------------------------|--------------------------------|-------------------------------|--------|--------------------------------|----------------|-------------------------------------------------|-------------------------------|--------|--------|----------------------------------|----------------|----------------|-------------------------------|----------------------------------|----------------|--------|-------------------------------------------------|----------------------------------|-------------------------------|----------------|
| Frac. Inten. (% of TIC) | 1.92                                            | 4.06                          | 6.02           | 8.63   | 2.10                                            | 3.40                           | 7.13                          | 2.69   | 3.13                           | 4.24           | 2.37                                            | 6.05                          | 0.07   | 5.55   | 2.52                             | 2.95           | 2.22           | 2.01                          | 2.32                             | 12.58          | 2.19   | 5.19                                            | 5.30                             | 3.20                          | 2.16           |
| Rel. Inten. (% of BP)   | 15.25                                           | 32.29                         | 47.80          | 68.56  | 16.65                                           | 27.00                          | 56.65                         | 21.41  | 24.89                          | 33.67          | 18.83                                           | 48.07                         | 0.55   | 44.11  | 20.00                            | 23.46          | 17.68          | 16.01                         | 18.40                            | 100.00         | 17.41  | 41.27                                           | 42.13                            | 25.44                         | 17.18          |
| Score                   | 0.50                                            | 1.00                          | 1.00           | -0.69  | 0.50                                            | 1.00                           | 1.00                          | -0.21  | 1.00                           | 1.00           | 0.50                                            | 1.00                          | 1.50   | -0.44  | 0.50                             | 1.00           | 1.00           | 1.00                          | 0.50                             | 1.00           | -0.17  | 0.50                                            | 1.00                             | 1.00                          | 1.00           |
| Ion-type                | b <sup>++</sup> <sub>11</sub> -H <sub>2</sub> O | b <sup>++</sup> <sub>11</sub> | b <sub>6</sub> |        | b <sup>++</sup> <sub>12</sub> -H <sub>2</sub> O | y <sup>+++</sup> <sub>16</sub> | b <sup>++</sup> <sub>12</sub> |        | y <sup>+++</sup> <sub>17</sub> | y <sub>5</sub> | b <sup>++</sup> <sub>13</sub> -H <sub>2</sub> O | b <sup>++</sup> <sub>13</sub> | sty    |        | y <sub>6</sub> -H <sub>2</sub> O | y <sub>6</sub> | b <sub>8</sub> | b <sup>++</sup> <sub>15</sub> | y <sub>7</sub> -H <sub>2</sub> O | y <sub>7</sub> |        | y <sup>++</sup> <sub>16</sub> -H <sub>2</sub> O | b <sub>9</sub> -H <sub>2</sub> O | b <sup>++</sup> <sub>17</sub> | y <sub>8</sub> |
| Delta Da                | 0.15                                            | 0.18                          | 0.12           |        | 0.06                                            | 0.19                           | 0.27                          |        | 0.23                           | 0.19           | 0.14                                            | -0.08                         | 0.66   | 0.07   | 0.06                             | 0.04           | 0.49           | 0.08                          | 0.11                             |                | 0.38   | -0.27                                           | 0.14                             | 0.09                          |                |
|                         |                                                 |                               |                |        |                                                 |                                |                               |        |                                |                |                                                 |                               |        |        |                                  |                |                |                               |                                  |                |        | 0.21                                            |                                  |                               |                |

# Peak 140

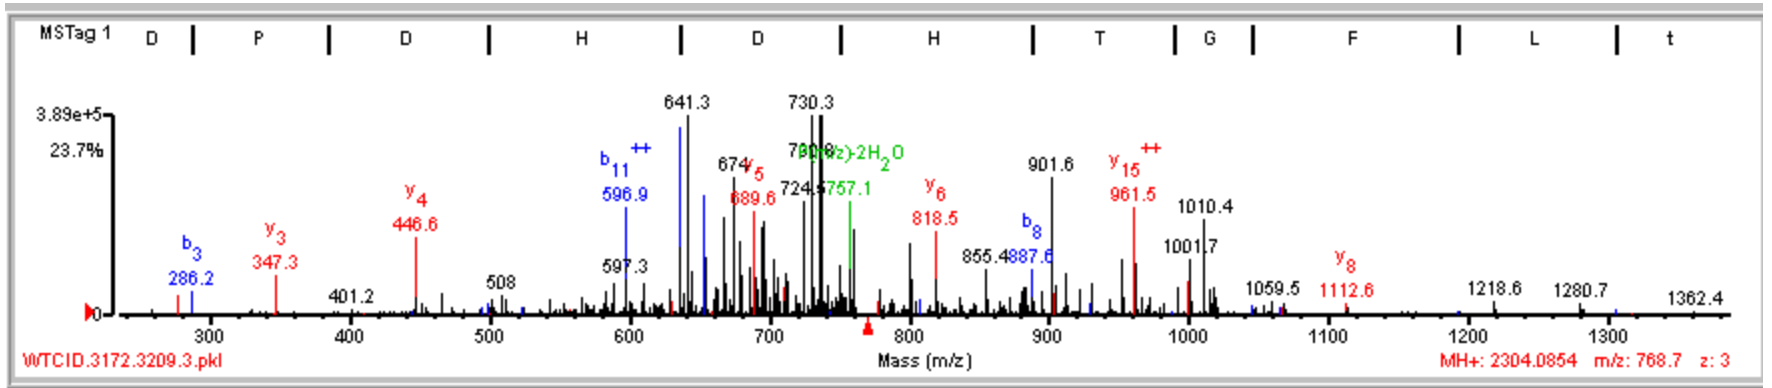

CID

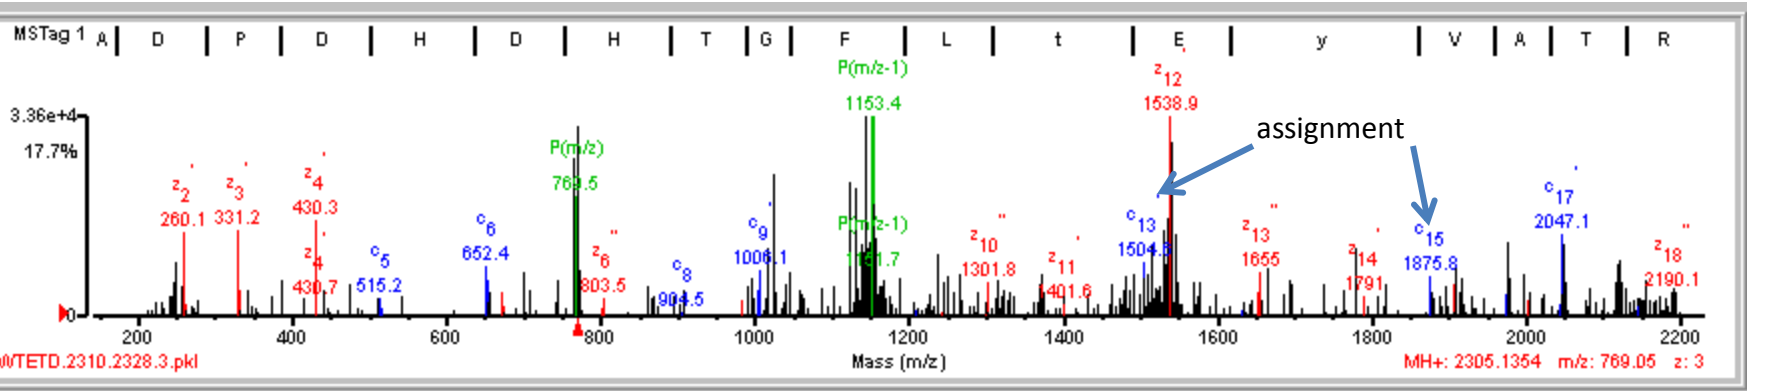

ETD

| Rank                    | Score          | SPI (%)         | BCS            | # Unmatched Ions | # Variable sites                  | Sequence                                      | MH <sup>+</sup> Calculated (Da) | MH <sup>+</sup> Error (Da) | MH <sup>+</sup> Error (ppm) | Protein MW/pl (Da) | Species         | Accession #              | MS-Digest Index #     | Protein Name                       |                |                                  |                |                                                |                |                                   |                 |                 |                                   |                 |         |
|-------------------------|----------------|-----------------|----------------|------------------|-----------------------------------|-----------------------------------------------|---------------------------------|----------------------------|-----------------------------|--------------------|-----------------|--------------------------|-----------------------|------------------------------------|----------------|----------------------------------|----------------|------------------------------------------------|----------------|-----------------------------------|-----------------|-----------------|-----------------------------------|-----------------|---------|
| 1                       | 14.91          | 83.3            | 11             | 4/25             | T185t Y187y                       | (R) V A/D/P/D H/D/H/T G F/L/t/E/y/V/A T R (W) | 2144.00                         | 160.0811                   | 64.4                        | 41389.9/6.50       | Homo sapiens    | <a href="#">66932916</a> | <a href="#">20787</a> | mitogen-activated protein kinase 1 |                |                                  |                |                                                |                |                                   |                 |                 |                                   |                 |         |
| 1                       | 14.91          | 83.3            | 11             | 4/25             | T185t Y187y                       | (R) V A/D/P/D H/D/H/T G F/L/t/E/y/V/A T R (W) | 2144.00                         | 160.0811                   | 64.4                        | 41389.9/6.50       | Homo sapiens    | <a href="#">20986531</a> | <a href="#">21374</a> | mitogen-activated protein kinase 1 |                |                                  |                |                                                |                |                                   |                 |                 |                                   |                 |         |
| Fragment-ion (m/z)      | 446.55         | 596.93          | 635.34         | 641.30           | 644.53                            | 653.49                                        | 668.06                          | 673.96                     | 679.64                      | 689.56             | 695.15          | 712.38                   | 724.46                | 730.32                             | 736.46         | 751.05                           | 759.85         | 800.46                                         | 818.49         | 887.61                            | 901.61          | 952.32          | 961.54                            | 1001.66         | 1010.38 |
| Frac. Inten. (% of TIC) | 2.90           | 4.63            | 7.86           | 8.01             | 2.39                              | 5.65                                          | 4.39                            | 5.67                       | 3.82                        | 5.40               | 5.17            | 3.02                     | 0.13                  | 0.51                               | 0.97           | 3.88                             | 3.34           | 3.47                                           | 3.93           | 2.71                              | 6.36            | 3.63            | 4.81                              | 2.49            | 4.85    |
| Rel. Inten. (% of BP)   | 36.20          | 57.87           | 98.21          | 100.00           | 29.84                             | 70.53                                         | 54.89                           | 70.80                      | 47.75                       | 67.51              | 64.56           | 37.78                    | 1.65                  | 6.42                               | 12.12          | 48.50                            | 41.72          | 43.34                                          | 49.04          | 33.88                             | 79.51           | 45.33           | 60.11                             | 31.14           | 60.53   |
| Score                   | 1.00           | 1.00            | 1.00           | 1.00             | 0.50                              | 1.00                                          | -0.55                           | 1.00                       | -0.48                       | 1.00               | -0.65           | 1.00                     | 0.25                  | 1.50                               | 1.00           | -0.42                            | 0.50           | 1.00                                           | 1.00           | 1.00                              | 0.25            | 0.50            | 1.00                              | 0.50            | 1.00    |
| Ion-type                | y <sub>4</sub> | b <sub>11</sub> | b <sub>8</sub> | y <sub>15</sub>  | b <sub>11</sub> -H <sub>2</sub> O | b <sub>12</sub>                               | y <sub>15</sub>                 | y <sub>16</sub>            | y <sub>5</sub>              | y <sub>17</sub>    | y <sub>18</sub> | st                       | st                    | sty                                | b <sub>7</sub> | y <sub>6</sub> -H <sub>2</sub> O | b <sub>8</sub> | y <sub>7</sub> -H <sub>3</sub> PO <sub>4</sub> | y <sub>8</sub> | y <sub>15</sub> -H <sub>2</sub> O | y <sub>16</sub> | y <sub>18</sub> | y <sub>16</sub> -H <sub>2</sub> O | y <sub>18</sub> |         |
| Delta Da                | 0.28           | 0.18            | 0.06           | 0.04             | 0.24                              | 0.19                                          | 0.35                            | 0.26                       | 0.43                        | 0.33               | 0.47            | 0.74                     | 0.13                  | 0.15                               | 0.25           | 0.23                             | -0.05          | 0.16                                           | 0.76           | 0.47                              |                 |                 |                                   |                 |         |







# Peak 144

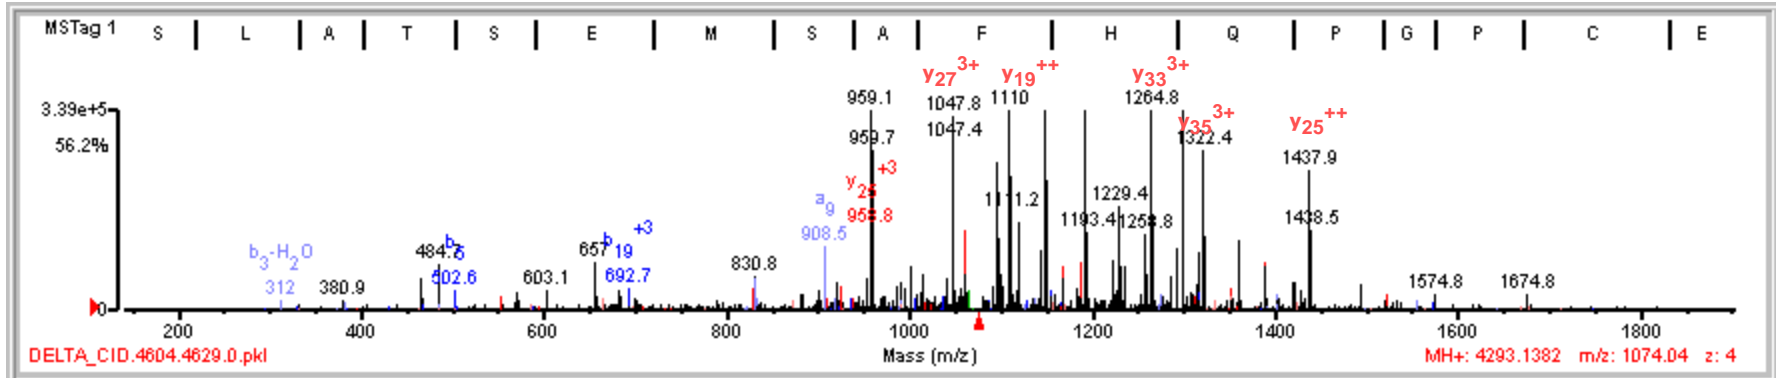

| Fragment-ion (m/z)     | 830.84                           | 907.71                         | 958.76                         | 959.06                         | 1001.90                        | 1047.37                        | 1060.86                       | 1096.72                        | 1110.01                       | 1120.39                        | 1143.57 | 1149.24                        | 1167.43                       | 1192.81                        | 1229.36 | 1258.80 | 1264.78                        | 1292.72 | 1298.50                        | 1316.54                       | 1322.35                        | 1360.64                       | 1388.84                        | 1437.89                       |
|------------------------|----------------------------------|--------------------------------|--------------------------------|--------------------------------|--------------------------------|--------------------------------|-------------------------------|--------------------------------|-------------------------------|--------------------------------|---------|--------------------------------|-------------------------------|--------------------------------|---------|---------|--------------------------------|---------|--------------------------------|-------------------------------|--------------------------------|-------------------------------|--------------------------------|-------------------------------|
| Frac. Inten.(% of TIC) | 1.64                             | 2.11                           | 1.35                           | 7.30                           | 1.35                           | 6.47                           | 3.28                          | 3.91                           | 10.42                         | 2.92                           | 1.43    | 6.36                           | 1.49                          | 7.30                           | 4.79    | 2.61    | 9.61                           | 2.45    | 8.22                           | 1.55                          | 4.32                           | 2.19                          | 2.42                           | 4.51                          |
| Rel. Inten.(% of BP)   | 15.78                            | 20.21                          | 12.94                          | 70.04                          | 12.92                          | 62.06                          | 31.45                         | 37.52                          | 100.00                        | 28.01                          | 13.76   | 61.01                          | 14.33                         | 70.02                          | 45.98   | 25.08   | 92.18                          | 23.55   | 78.83                          | 14.88                         | 41.47                          | 20.98                         | 23.27                          | 43.31                         |
| Score                  | 1.00                             | 1.00                           | 1.00                           | 1.00                           | 1.00                           | 1.00                           | 1.00                          | 1.00                           | 1.00                          | 1.00                           | -0.14   | 1.00                           | 1.00                          | 1.00                           | -0.46   | -0.25   | 1.00                           | -0.24   | 1.00                           | 1.00                          | 1.00                           | 1.00                          | 1.00                           | 1.00                          |
| Ion-type               | b <sub>3</sub> -H <sub>2</sub> O | a <sub>9</sub>                 | y <sup>+++</sup> <sub>25</sub> | y <sup>+++</sup> <sub>25</sub> | y <sup>+++</sup> <sub>26</sub> | y <sup>+++</sup> <sub>27</sub> | y <sup>++</sup> <sub>18</sub> | y <sup>+++</sup> <sub>28</sub> | y <sup>++</sup> <sub>19</sub> | y <sup>+++</sup> <sub>29</sub> |         | y <sup>+++</sup> <sub>30</sub> | y <sup>++</sup> <sub>20</sub> | y <sup>+++</sup> <sub>31</sub> |         |         | y <sup>+++</sup> <sub>33</sub> |         | b <sup>+++</sup> <sub>34</sub> | b <sup>++</sup> <sub>24</sub> | y <sup>+++</sup> <sub>35</sub> | y <sup>++</sup> <sub>23</sub> | y <sup>++</sup> <sub>24</sub>  | y <sup>++</sup> <sub>25</sub> |
| Delta Da               | -0.52                            | -0.69                          | 0.36                           | 0.66                           | 0.82                           | 0.60                           | -0.09                         | 0.93                           | 0.53                          | 0.92                           |         | 0.76                           | 0.44                          | 0.65                           |         |         | 0.59                           |         | 0.97                           | -0.51                         | 0.80                           | 0.58                          | 0.27                           | 0.80                          |
|                        | y <sup>++</sup> <sub>14</sub>    | y <sup>+++</sup> <sub>23</sub> |                                |                                |                                |                                |                               |                                |                               |                                |         |                                |                               |                                |         |         |                                |         | y <sup>+++</sup> <sub>34</sub> |                               |                                |                               | y <sup>+++</sup> <sub>37</sub> |                               |
|                        | 0.48                             | 0.67                           |                                |                                |                                |                                |                               |                                |                               |                                |         |                                |                               |                                |         |         |                                |         | 0.63                           |                               |                                |                               | 0.59                           |                               |



# Peak 146

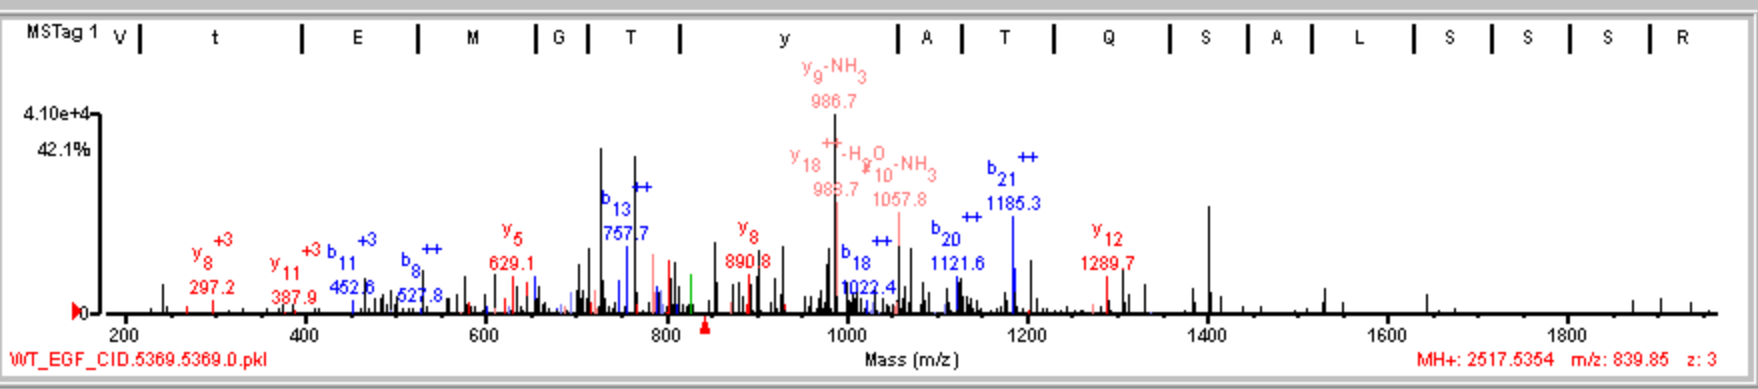

| Fragment-ion (m/z)     | 629.09         | 653.86         | 714.97                         | 727.84         | 756.80                         | 766.15                           | 785.29         | 803.76 | 805.62 | 853.65                         | 900.68                           | 903.29                         | 929.90 | 981.04 | 986.70                          | 1000.05 | 1057.75                          | 1071.54                        | 1126.87        | 1185.31                        | 1204.69 | 1289.68 | 1305.75         | 1401.92 |
|------------------------|----------------|----------------|--------------------------------|----------------|--------------------------------|----------------------------------|----------------|--------|--------|--------------------------------|----------------------------------|--------------------------------|--------|--------|---------------------------------|---------|----------------------------------|--------------------------------|----------------|--------------------------------|---------|---------|-----------------|---------|
| Frac. Inten.(% of TIC) | 1.67           | 1.63           | 2.62                           | 6.78           | 3.44                           | 6.98                             | 1.80           | 2.58   | 2.07   | 2.16                           | 1.94                             | 3.18                           | 2.10   | 2.00   | 28.64                           | 1.70    | 7.23                             | 2.21                           | 1.77           | 5.03                           | 2.48    | 1.70    | 2.66            | 5.65    |
| Rel. Inten.(% of BP)   | 5.83           | 5.70           | 9.14                           | 23.69          | 12.01                          | 24.36                            | 6.29           | 9.00   | 7.22   | 7.55                           | 6.77                             | 11.10                          | 7.32   | 6.98   | 100.00                          | 5.92    | 25.26                            | 7.71                           | 6.19           | 17.57                          | 8.64    | 5.93    | 9.29            | 19.74   |
| Score                  | 1.00           | 1.00           | 1.00                           | -0.24          | 1.00                           | -0.24                            | 0.50           | 1.00   | -0.07  | -0.08                          | 1.00                             | 1.00                           | -0.07  | -0.07  | 0.50                            | -0.06   | 0.50                             | 1.00                           | 1.00           | 1.00                           | -0.09   | 1.00    | -0.09           | -0.20   |
| Ion-type               | y <sub>5</sub> | b <sub>5</sub> | b <sub>11</sub> + <sub>3</sub> | b <sub>8</sub> | b <sub>13</sub> + <sub>3</sub> | y <sub>7</sub> -H <sub>2</sub> O | y <sub>7</sub> |        |        | b <sub>18</sub> + <sub>2</sub> | y <sub>10</sub> -NH <sub>3</sub> | y <sub>18</sub> + <sub>2</sub> |        |        | y <sub>9</sub> -NH <sub>3</sub> |         | y <sub>10</sub> -NH <sub>3</sub> | b <sub>21</sub> + <sub>2</sub> | b <sub>9</sub> | b <sub>21</sub> + <sub>2</sub> |         |         | y <sub>12</sub> |         |
| Delta Da               | -0.32          | -0.40          | 0.66                           |                | -0.49                          |                                  | -0.17          | 0.29   |        |                                | -0.18                            | -0.15                          |        |        | 0.14                            |         | 0.15                             | 0.59                           | 0.48           | -0.22                          |         |         | -0.04           |         |

# Peak 147

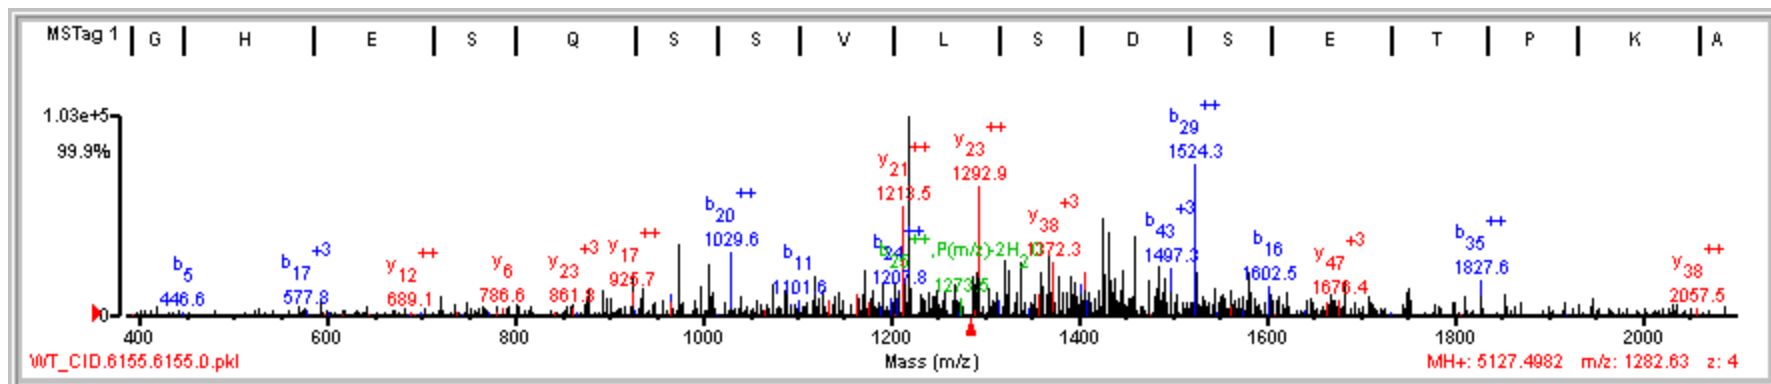

| Rank                    | Score             | SPI (%)           | BCS    | # Unmatched Ions   | Variable sites  | Sequence                                                                                                        | MH+ Calculated (Da) | MH+ Error (Da) | MH+ Error (ppm)   | Protein MW/pi (Da) | Species      | Accession #              | MS-Digest Index #     | Protein Name      |                   |                    |         |         |                                  |         |         |                                   |                   |                    |                   |
|-------------------------|-------------------|-------------------|--------|--------------------|-----------------|-----------------------------------------------------------------------------------------------------------------|---------------------|----------------|-------------------|--------------------|--------------|--------------------------|-----------------------|-------------------|-------------------|--------------------|---------|---------|----------------------------------|---------|---------|-----------------------------------|-------------------|--------------------|-------------------|
| 1                       | 10.24             | 67.8              | 11     | 9/25               | Y8386y          | (R)T S I S /G H E S Q S S V L S D S E T P \K A T S /P M /G T /T \Y T M /G E T S \V S I S T S \D F F E T S R (I) | 5048.28             | 79.2199        | -145.6            | 1519181.9/5.13     | Homo sapiens | <a href="#">83367077</a> | <a href="#">16118</a> | mucin 16          |                   |                    |         |         |                                  |         |         |                                   |                   |                    |                   |
| Fragment-ion (m/z)      | 924.78            | 965.33            | 973.89 | 1029.65            | 1171.97         | 1213.46                                                                                                         | 1219.43             | 1287.37        | 1292.90           | 1321.24            | 1337.96      | 1369.27                  | 1372.32               | 1402.69           | 1406.66           | 1410.73            | 1426.45 | 1432.50 | 1459.04                          | 1486.13 | 1491.78 | 1497.34                           | 1524.27           | 1581.57            | 1827.61           |
| Frac. Inten. (% of TIC) | 3.22              | 2.20              | 3.60   | 3.07               | 3.07            | 6.80                                                                                                            | 9.88                | 2.82           | 6.17              | 3.34               | 3.25         | 3.23                     | 2.78                  | 2.73              | 2.54              | 2.20               | 6.05    | 4.43    | 6.57                             | 2.68    | 2.82    | 2.88                              | 7.83              | 3.01               | 2.83              |
| Rel. Inten. (% of BP)   | 32.57             | 22.27             | 36.49  | 31.12              | 31.08           | 68.85                                                                                                           | 100.00              | 28.53          | 62.49             | 33.82              | 32.87        | 32.73                    | 28.18                 | 27.64             | 25.72             | 22.29              | 61.23   | 44.81   | 66.48                            | 27.18   | 28.56   | 29.16                             | 79.31             | 30.51              | 28.67             |
| Score                   | 1.00              | 1.00              | -0.36  | 1.00               | 0.25            | 1.00                                                                                                            | 1.00                | -0.29          | 1.00              | -0.34              | -0.33        | -0.33                    | 0.25                  | 1.00              | 1.00              | 1.00               | -0.61   | -0.45   | 0.50                             | -0.27   | -0.29   | 0.50                              | 1.00              | 1.00               | 1.00              |
| Ion-type                | y <sup>++17</sup> | b <sup>++19</sup> |        | b <sup>+++20</sup> | a <sub>12</sub> | y <sup>++21</sup>                                                                                               | b <sup>+++35</sup>  |                | y <sup>++23</sup> |                    |              |                          | a <sub>14</sub>       | b <sup>++28</sup> | y <sup>++25</sup> | b <sup>+++41</sup> |         |         | y <sub>13</sub> -NH <sub>3</sub> |         |         | b <sub>16</sub> -H <sub>2</sub> O | b <sup>++29</sup> | y <sup>+++44</sup> | b <sup>++35</sup> |
| Delta Da                | -0.65             | -0.11             |        | 0.17               | -0.58           | -0.05                                                                                                           | 0.91                |                | 0.36              |                    |              |                          | -0.35                 | 0.04              | 0.07              | 0.78               |         |         | 0.37                             |         |         | -0.34                             | 0.11              | 0.88               | 0.33              |





# Peak 150

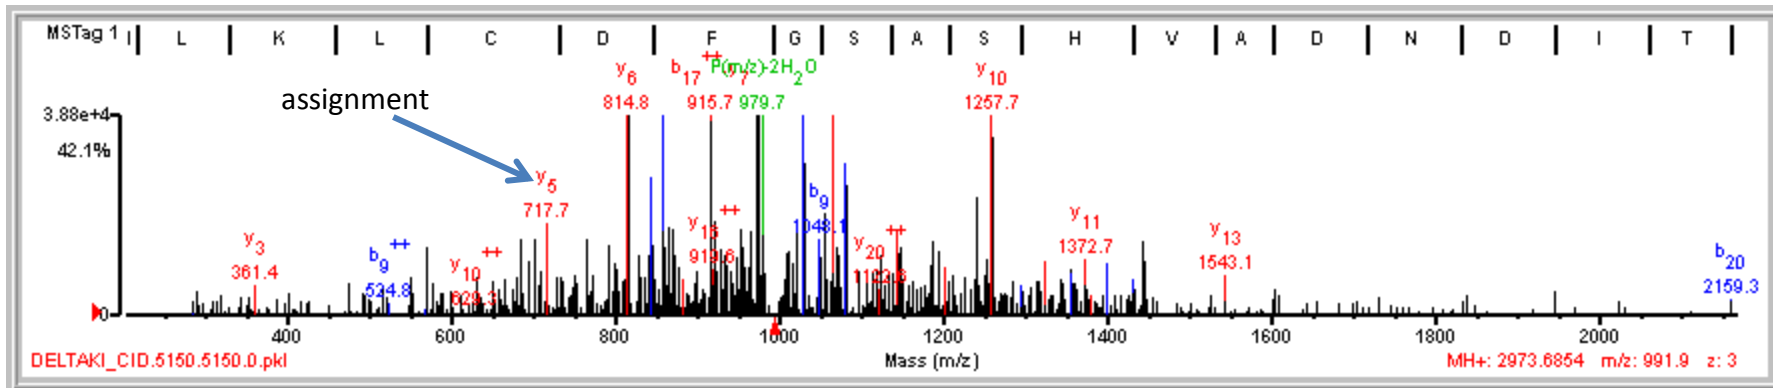

1 16.35 87.7 13 6/25 Y849y (K) T I / L K / L C D F G S A S H V / A / D / N \ D / I / P / Y L \ V \ S R (F) 2892.46 81.2294 424.8 116987.4/10.26 Homo sapiens [89276756](#) [18658](#) serine/threonine-protein kinase PRP4K

| Fragment-ion (m/z)     | 716.89         | 814.77         | 844.72         | 858.64                         | 871.58                         | 915.67                        | 920.89                         | 922.52 | 932.69 | 948.37 | 953.18 | 965.16 | 973.48                           | 1021.72 | 1029.88                          | 1055.96                                         | 1065.33                       | 1071.28                                         | 1080.40                       | 1240.89                          | 1257.67         | 1259.66                          | 1355.52                       | 1372.68         | 1444.18         |
|------------------------|----------------|----------------|----------------|--------------------------------|--------------------------------|-------------------------------|--------------------------------|--------|--------|--------|--------|--------|----------------------------------|---------|----------------------------------|-------------------------------------------------|-------------------------------|-------------------------------------------------|-------------------------------|----------------------------------|-----------------|----------------------------------|-------------------------------|-----------------|-----------------|
| Frac. Inten.(% of TIC) | 2.35           | 10.70          | 4.09           | 6.10                           | 3.45                           | 10.72                         | 2.16                           | 1.97   | 2.15   | 1.88   | 2.25   | 2.17   | 9.97                             | 1.88    | 7.41                             | 2.62                                            | 4.83                          | 2.20                                            | 4.85                          | 3.56                             | 3.08            | 3.82                             | 1.87                          | 1.91            | 2.03            |
| Rel. Inten.(% of BP)   | 21.88          | 99.79          | 38.13          | 56.91                          | 32.15                          | 100.00                        | 20.13                          | 18.35  | 20.08  | 17.50  | 20.95  | 20.29  | 93.05                            | 17.50   | 69.11                            | 24.45                                           | 45.09                         | 20.53                                           | 45.24                         | 33.20                            | 28.78           | 35.60                            | 17.44                         | 17.81           | 18.94           |
| Score                  | 1.00           | 1.00           | 1.00           | 1.00                           | 1.00                           | 1.00                          | 1.00                           | -0.18  | -0.20  | -0.17  | -0.21  | -0.20  | 1.00                             | -0.17   | 1.00                             | 0.50                                            | 1.00                          | 0.50                                            | 1.00                          | 0.50                             | 1.00            | 1.00                             | 1.00                          | 1.00            | 1.00            |
| Ion-type               | y <sub>5</sub> | y <sub>6</sub> | b <sub>7</sub> | b <sup>+++</sup> <sub>16</sub> | b <sup>+++</sup> <sub>23</sub> | b <sup>++</sup> <sub>17</sub> | y <sup>+++</sup> <sub>24</sub> |        |        |        |        |        | b <sup>++</sup> <sub>18</sub>    |         | b <sup>++</sup> <sub>19</sub>    | y <sup>++</sup> <sub>19</sub> -H <sub>2</sub> O | y <sup>++</sup> <sub>19</sub> | b <sup>++</sup> <sub>20</sub> -H <sub>2</sub> O | b <sup>++</sup> <sub>20</sub> | y <sub>10</sub> -NH <sub>3</sub> | y <sub>10</sub> | y <sup>++</sup> <sub>22</sub>    | b <sup>++</sup> <sub>24</sub> | y <sub>11</sub> | y <sub>12</sub> |
| Delta Da               | -0.44          | 0.38           | 0.26           | 0.22                           | 0.17                           | 0.22                          | 0.79                           |        |        |        |        |        | 0.52                             |         | 0.38                             | -0.02                                           | 0.34                          | 0.26                                            | 0.37                          | 0.33                             | 0.08            | 0.60                             | -0.62                         | 0.07            | 0.53            |
|                        |                |                |                |                                |                                | y <sub>7</sub>                |                                |        |        |        |        |        | b <sub>9</sub> -H <sub>2</sub> O |         | b <sub>9</sub> -H <sub>2</sub> O |                                                 |                               |                                                 |                               |                                  |                 | y <sub>11</sub> -NH <sub>3</sub> |                               |                 |                 |



# Peak 151

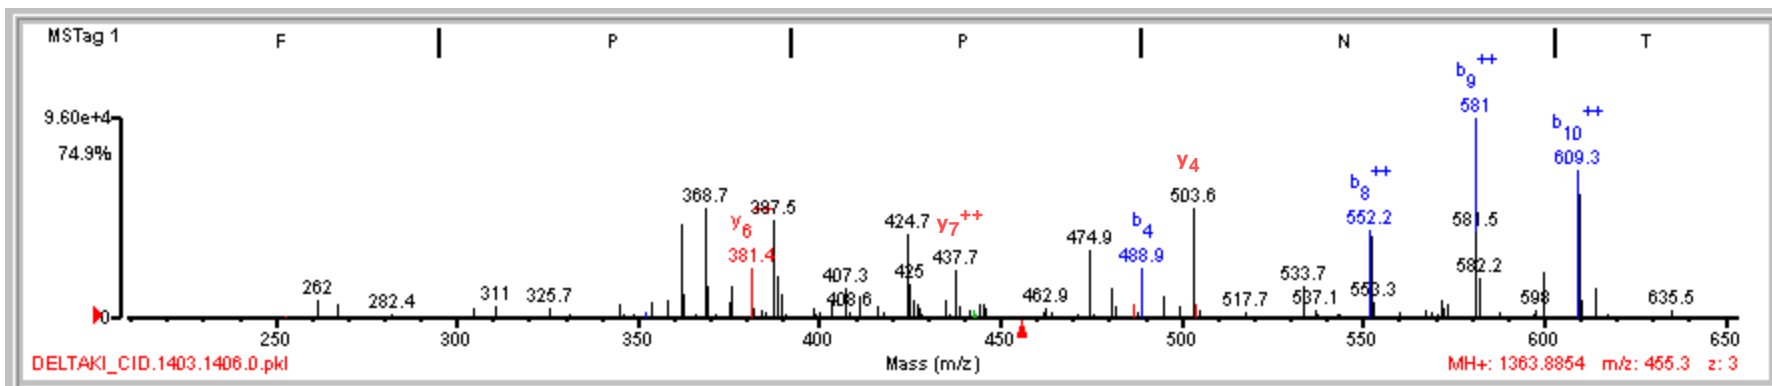

| Rank | Score | SPI (%) | BCS | # Unmatched Ions | Variable sites | Sequence                      | MH <sup>+</sup> Calculated (Da) | MH <sup>+</sup> Error (Da) | MH <sup>+</sup> Error (ppm) | Protein MW/pI (Da) | Species      | Accession #              | MS-Digest Index #     | Protein Name                                             |
|------|-------|---------|-----|------------------|----------------|-------------------------------|---------------------------------|----------------------------|-----------------------------|--------------------|--------------|--------------------------|-----------------------|----------------------------------------------------------|
| 1    | 9.09  | 82.3    | 6   | 3/14             | Y339y          | (R) F/F P P N/T R/Y\G\G\K (S) | 1283.65                         | 80.2323                    | 195.0                       | 195685.2/5.92      | Homo sapiens | <a href="#">90669194</a> | <a href="#">10290</a> | deleted in lung and esophageal cancer 1 isoform DLEC1-N1 |
| 1    | 9.09  | 82.3    | 6   | 3/14             | Y339y          | (R) F/F P P N/T R/Y\G\G\K (S) | 1283.65                         | 80.2323                    | 195.0                       | 197898.8/6.03      | Homo sapiens | <a href="#">90669228</a> | <a href="#">31686</a> | deleted in lung and esophageal cancer 1 isoform DLEC1-S3 |

| Fragment-ion (m/z)      | 362.29 | 368.66                        | 381.35                       | 387.47                        | 424.68 | 437.72                       | 474.94 | 488.86         | 503.62         | 552.16                       | 571.84                                         | 581.03                       | 600.29                                          | 609.31                        |
|-------------------------|--------|-------------------------------|------------------------------|-------------------------------|--------|------------------------------|--------|----------------|----------------|------------------------------|------------------------------------------------|------------------------------|-------------------------------------------------|-------------------------------|
| Frac. Inten. (% of TIC) | 5.85   | 6.91                          | 2.98                         | 8.70                          | 8.27   | 3.15                         | 3.57   | 2.41           | 6.52           | 9.09                         | 2.29                                           | 19.52                        | 2.27                                            | 18.47                         |
| Rel. Inten. (% of BP)   | 29.97  | 35.40                         | 15.26                        | 44.58                         | 42.36  | 16.13                        | 18.27  | 12.35          | 33.42          | 46.57                        | 11.75                                          | 100.00                       | 11.61                                           | 94.64                         |
| Score                   | -0.30  | 1.00                          | 1.00                         | 1.00                          | -0.42  | 1.00                         | -0.18  | 1.00           | 1.00           | 1.00                         | 0.50                                           | 1.00                         | 0.50                                            | 1.00                          |
| Ion-type                |        | b <sup>+++</sup> <sub>8</sub> | y <sup>++</sup> <sub>6</sub> | b <sup>+++</sup> <sub>9</sub> |        | y <sup>++</sup> <sub>7</sub> |        | b <sub>4</sub> | y <sub>4</sub> | b <sup>++</sup> <sub>8</sub> | b <sup>++</sup> <sub>9</sub> -H <sub>2</sub> O | b <sup>++</sup> <sub>9</sub> | b <sup>++</sup> <sub>10</sub> -H <sub>2</sub> O | b <sup>++</sup> <sub>10</sub> |
| Delta Da                |        | 0.16                          | 0.18                         | -0.03                         |        | -0.47                        |        | -0.39          | -0.57          | -0.08                        | 0.10                                           | 0.28                         | 0.03                                            | 0.05                          |
|                         |        |                               |                              |                               |        |                              |        |                |                |                              |                                                |                              | y <sup>++</sup> <sub>10</sub> -H <sub>2</sub> O | y <sup>++</sup> <sub>10</sub> |
|                         |        |                               |                              |                               |        |                              |        |                |                |                              |                                                |                              | 0.52                                            | 0.53                          |





# Peak 154

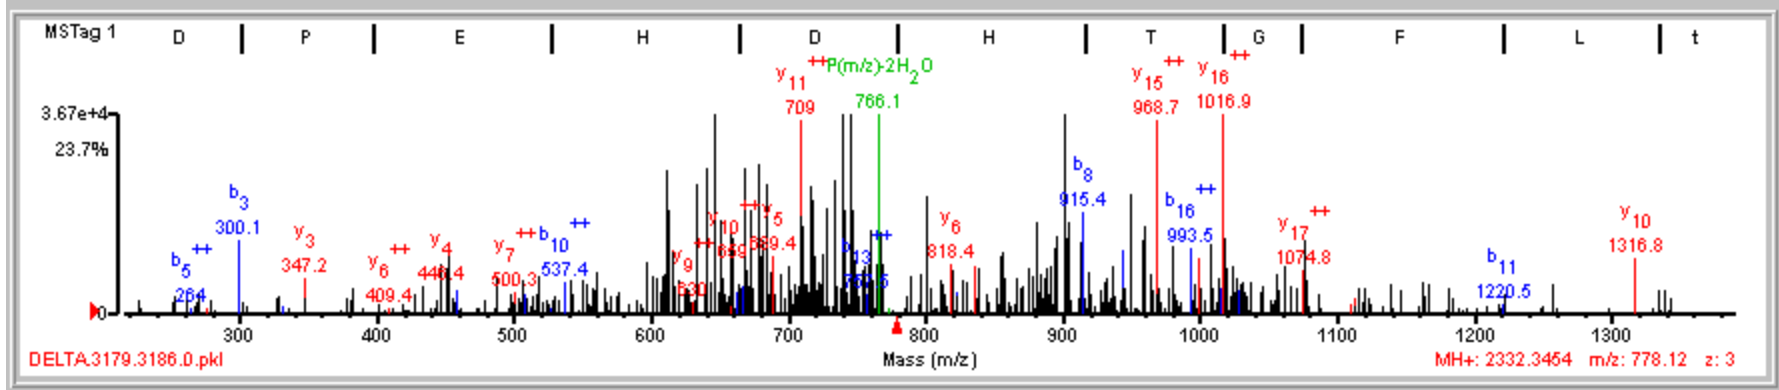

|   |       |      |   |      |             |                                                |         |          |       |              |              |                           |                       |                                              |
|---|-------|------|---|------|-------------|------------------------------------------------|---------|----------|-------|--------------|--------------|---------------------------|-----------------------|----------------------------------------------|
| 1 | 14.88 | 89.4 | 9 | 3/25 | T202t Y204y | (R) I A/D/P/E/H D H/T/G F\L\t E Y\ V A T R (W) | 2172.04 | 160.3098 | 161.7 | 43135.8/6.28 | Homo sapiens | <a href="#">91718899</a>  | <a href="#">1012</a>  | mitogen-activated protein kinase 3 isoform 1 |
| 1 | 14.88 | 89.4 | 9 | 3/25 | T202t Y204y | (R) I A/D/P/E/H D H/T/G F\L\t E Y\ V A T R (W) | 2172.04 | 160.3098 | 161.7 | 40088.2/7.16 | Homo sapiens | <a href="#">91718897</a>  | <a href="#">3088</a>  | mitogen-activated protein kinase 3 isoform 2 |
| 1 | 14.88 | 89.4 | 9 | 3/25 | T202t Y204y | (R) I A/D/P/E/H D H/T/G F\L\t E Y\ V A T R (W) | 2172.04 | 160.3098 | 161.7 | 38275.1/5.80 | Homo sapiens | <a href="#">158138507</a> | <a href="#">36296</a> | mitogen-activated protein kinase 3 isoform 3 |

| Fragment-ion (m/z)     | 611.38                        | 639.97 | 645.99                           | 658.29                                          | 667.76                        | 672.36                          | 678.32                         | 684.29 | 708.99                        | 717.03                         | 733.56 | 739.52 | 739.97 | 745.96 | 760.48                           | 800.39                           | 894.86                                          | 901.46                                         | 904.44                        | 943.89                        | 959.05                                          | 968.12                        | 1008.26                                         | 1016.92        | 1075.88                       |
|------------------------|-------------------------------|--------|----------------------------------|-------------------------------------------------|-------------------------------|---------------------------------|--------------------------------|--------|-------------------------------|--------------------------------|--------|--------|--------|--------|----------------------------------|----------------------------------|-------------------------------------------------|------------------------------------------------|-------------------------------|-------------------------------|-------------------------------------------------|-------------------------------|-------------------------------------------------|----------------|-------------------------------|
| Frac. Inten.(% of TIC) | 2.70                          | 4.95   | 8.48                             | 4.22                                            | 4.87                          | 3.29                            | 5.51                           | 2.93   | 9.46                          | 4.76                           | 0.16   | 0.18   | 0.55   | 0.89   | 3.92                             | 3.10                             | 3.01                                            | 7.24                                           | 2.77                          | 2.88                          | 3.74                                            | 7.56                          | 2.98                                            | 7.12           | 2.74                          |
| Rel. Inten.(% of BP)   | 28.53                         | 52.39  | 89.62                            | 44.63                                           | 51.46                         | 34.80                           | 58.29                          | 30.96  | 100.00                        | 50.34                          | 1.66   | 1.93   | 5.78   | 9.45   | 41.44                            | 32.78                            | 31.86                                           | 76.55                                          | 29.31                         | 30.47                         | 39.50                                           | 79.94                         | 31.52                                           | 75.23          | 28.95                         |
| Score                  | 1.00                          | -0.52  | 1.00                             | 1.00                                            | 1.00                          | 0.50                            | 1.00                           | -0.31  | 1.00                          | 1.00                           |        | 0.25   | 0.25   | 1.50   | 0.50                             | 0.50                             | 0.50                                            | 0.25                                           | 1.00                          | 1.00                          | 0.50                                            | 1.00                          | 0.50                                            | 1.00           | -0.29                         |
| Ion-type               | b <sup>++</sup> <sub>11</sub> |        | b <sub>6</sub> -H <sub>2</sub> O | b <sup>++</sup> <sub>12</sub> -H <sub>2</sub> O | b <sup>++</sup> <sub>12</sub> | y <sub>5</sub> -NH <sub>3</sub> | y <sup>+++</sup> <sub>18</sub> |        | y <sup>++</sup> <sub>11</sub> | y <sup>+++</sup> <sub>17</sub> | st     | st     | st     | sty    | b <sub>7</sub> -H <sub>2</sub> O | y <sub>6</sub> -H <sub>2</sub> O | y <sup>++</sup> <sub>14</sub> -H <sub>2</sub> O | y <sub>7</sub> -H <sub>3</sub> PO <sub>4</sub> | y <sup>++</sup> <sub>14</sub> | b <sup>++</sup> <sub>15</sub> | y <sup>++</sup> <sub>15</sub> -H <sub>2</sub> O | y <sup>++</sup> <sub>15</sub> | y <sup>++</sup> <sub>16</sub> -H <sub>2</sub> O | b <sub>9</sub> | y <sup>++</sup> <sub>16</sub> |
| Delta Da               | 0.61                          |        | 0.69                             | -0.02                                           | 0.45                          | 0.08                            | 0.04                           |        | -0.30                         | 0.41                           |        | 0.19   | 0.64   | 0.62   | 0.15                             | 0.06                             | -0.00                                           | 0.08                                           | 0.57                          | 0.03                          | -0.33                                           | -0.27                         | 0.35                                            | 0.48           | 0.01                          |

# Peak 156

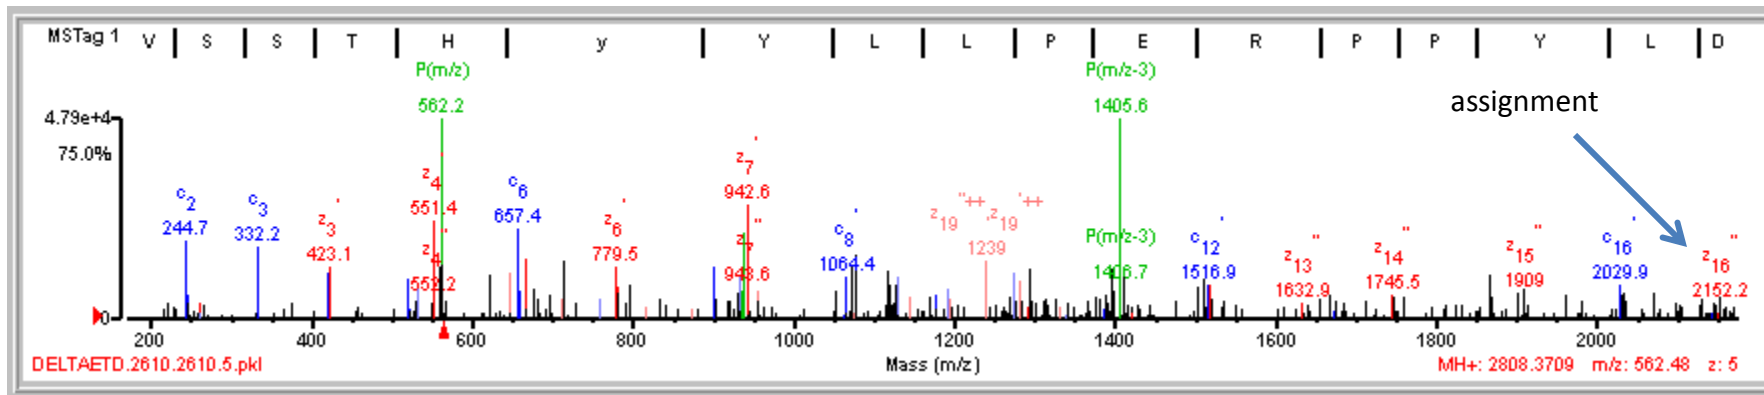

| Rank                    | Score | SPI (%)        | BCS            | # Unmatched Ions | Variable sites | Sequence                                                      | MH <sup>+</sup> Calculated (Da) | MH <sup>+</sup> Error (Da) | MH <sup>+</sup> Error (ppm) | Protein MW/pI (Da)             | Species        | Accession #    | MS-Digest Index # | Protein Name                     |         |                |                                |                                |                                |                 |                 |         |                 |                 |                 |
|-------------------------|-------|----------------|----------------|------------------|----------------|---------------------------------------------------------------|---------------------------------|----------------------------|-----------------------------|--------------------------------|----------------|----------------|-------------------|----------------------------------|---------|----------------|--------------------------------|--------------------------------|--------------------------------|-----------------|-----------------|---------|-----------------|-----------------|-----------------|
| 1                       | 15.08 | 92.5           | 14             | 2/24             | Y394y          | (K) K V I S I S T H Y Y L L P E R P P I Y L I D / K Y E K (F) | 2726.42                         | 81.9521                    | 707.1                       | 50560.3/8.38                   | Homo sapiens   | 10047086       | 949               | mitogen-inducible gene 6 protein |         |                |                                |                                |                                |                 |                 |         |                 |                 |                 |
| Fragment-ion (m/z)      |       | 244.72         | 332.24         | 419.41           | 423.10         | 520.36                                                        | 551.45                          | 657.38                     | 667.50                      | 715.33                         | 779.51         | 900.64         | 942.65            | 1072.30                          | 1077.26 | 1176.63        | 1239.03                        | 1275.21                        | 1282.66                        | 1294.29         | 1516.90         | 1518.60 | 1867.45         | 1908.97         | 2029.87         |
| Frac. Inten. (% of TIC) |       | 7.13           | 4.73           | 2.84             | 4.27           | 3.19                                                          | 6.69                            | 5.91                       | 3.48                        | 2.85                           | 4.18           | 2.89           | 8.14              | 4.27                             | 3.81    | 3.10           | 3.22                           | 3.17                           | 3.36                           | 4.79            | 2.94            | 3.69    | 4.15            | 2.79            | 4.40            |
| Rel. Inten. (% of BP)   |       | 87.57          | 58.13          | 34.87            | 52.46          | 39.12                                                         | 82.16                           | 72.54                      | 42.67                       | 35.03                          | 51.28          | 35.47          | 100.00            | 52.40                            | 46.83   | 38.01          | 39.49                          | 38.95                          | 41.27                          | 58.80           | 36.10           | 45.35   | 51.01           | 34.24           | 54.05           |
| Score                   |       | 1.00           | 1.00           | 1.00             | 1.00           | 1.00                                                          | 1.00                            | 1.00                       | 0.25                        | 0.25                           | 1.00           | 1.00           | 1.00              | 0.25                             | -0.47   | 1.00           | 1.00                           | 1.00                           | 1.00                           | 0.25            | 0.25            | -0.45   | 0.25            | 0.25            | 0.25            |
| Ion-type                |       | c <sub>2</sub> | c <sub>3</sub> | c <sub>4</sub>   | z <sub>3</sub> | c <sub>5</sub>                                                | z <sub>4</sub>                  | c <sub>6</sub>             | z <sub>5</sub>              | c <sub>3</sub> + <sub>17</sub> | z <sub>6</sub> | c <sub>7</sub> | z <sub>7</sub>    | c <sub>1</sub> + <sub>17</sub>   |         | c <sub>9</sub> | z <sub>1</sub> + <sub>19</sub> | c <sub>1</sub> + <sub>20</sub> | z <sub>1</sub> + <sub>20</sub> | z <sub>10</sub> | c <sub>12</sub> |         | c <sub>15</sub> | z <sub>15</sub> | c <sub>16</sub> |
| Delta Da                |       | -0.48          | 0.01           | 0.15             | -0.10          | 0.05                                                          | 0.16                            | 0.01                       | 0.17                        | 0.30                           | 0.10           | 0.24           | 0.18              | 0.25                             |         | 0.09           | 0.44                           | 0.57                           | 0.55                           | 0.61            | 0.17            |         | 0.51            | -0.04           | -0.13           |

# Peak 157

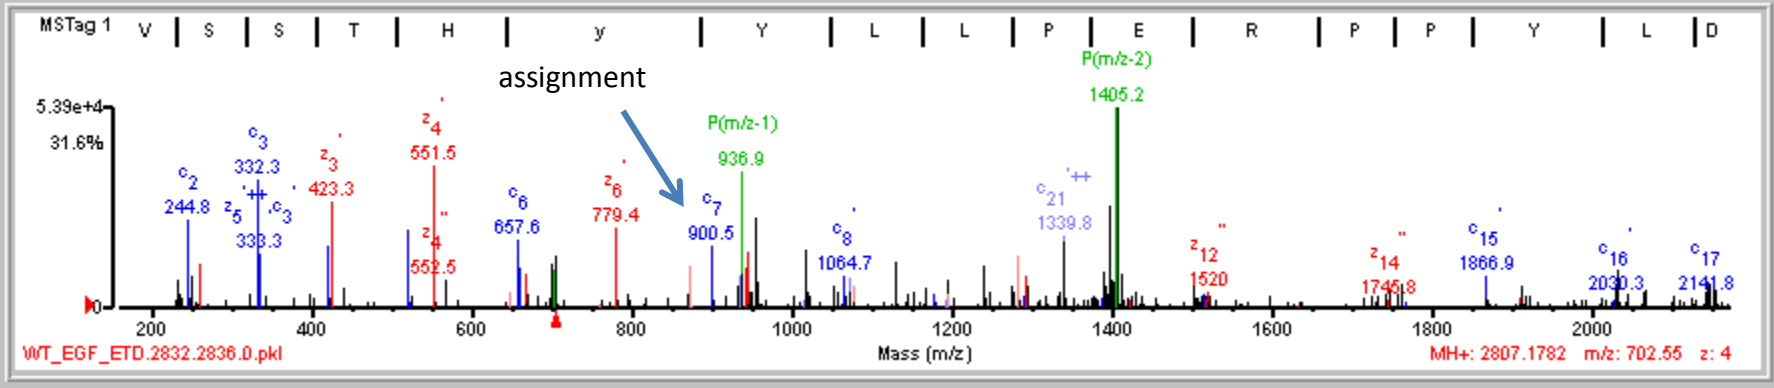

| Rank                    | Score          | SPI (%)        | BCS            | # Unmatched Ions | Variable sites | Sequence                                             | MH+ Calculated (Da) | MH+ Error (Da) | MH+ Error (ppm) | Protein MW/pl (Da) | Species        | Accession #              | MS-Digest Index #   | Protein Name                     |                                |                                |                                |                                |                                |                                |                                |                              |         |         |
|-------------------------|----------------|----------------|----------------|------------------|----------------|------------------------------------------------------|---------------------|----------------|-----------------|--------------------|----------------|--------------------------|---------------------|----------------------------------|--------------------------------|--------------------------------|--------------------------------|--------------------------------|--------------------------------|--------------------------------|--------------------------------|------------------------------|---------|---------|
| 1                       | 15.64          | 89.1           | 13             | 4/24             | Y394y          | (K)K/V/S/I/S/T/H/Y Y L L P E R P P Y L D K/Y/E/K (F) | 2726.42             | 80.7593        | 282.5           | 50560.3/8.38       | Homo sapiens   | <a href="#">10047086</a> | <a href="#">949</a> | mitogen-inducible gene 6 protein |                                |                                |                                |                                |                                |                                |                                |                              |         |         |
| Fragment-ion (m/z)      | 244.83         | 248.50         | 259.80         | 332.26           | 419.34         | 423.29                                               | 520.42              | 551.51         | 657.55          | 666.51             | 779.45         | 900.51                   | 942.80              | 955.59                           | 1016.01                        | 1071.71                        | 1130.27                        | 1239.30                        | 1282.83                        | 1339.76                        | 1411.87                        | 1866.86                      | 2145.45 | 2153.57 |
| Frac. Inten. (% of TIC) | 4.85           | 2.70           | 2.62           | 7.95             | 3.62           | 4.90                                                 | 4.00                | 7.80           | 4.88            | 3.82               | 5.89           | 3.25                     | 4.58                | 5.04                             | 2.88                           | 2.57                           | 2.74                           | 4.14                           | 2.84                           | 8.02                           | 2.87                           | 2.72                         | 2.71    | 2.62    |
| Rel. Inten. (% of BP)   | 60.46          | 33.63          | 32.63          | 99.13            | 45.08          | 61.13                                                | 49.89               | 97.27          | 60.84           | 47.67              | 73.42          | 40.57                    | 57.08               | 62.80                            | 35.88                          | 31.99                          | 34.15                          | 51.62                          | 35.40                          | 100.00                         | 35.77                          | 33.91                        | 33.80   | 32.61   |
| Score                   | 1.00           | -0.34          | 1.00           | 1.00             | 1.00           | 1.00                                                 | 1.00                | 1.00           | 1.00            | 1.00               | 1.00           | 1.00                     | 1.00                | 0.25                             | 0.25                           | 1.00                           | 0.25                           | 1.00                           | 1.00                           | 1.00                           | -0.36                          | 0.25                         | -0.34   | -0.33   |
| Ion-type                | c <sub>2</sub> | z <sub>2</sub> | c <sub>3</sub> | z <sub>3</sub>   | c <sub>4</sub> | z <sub>3</sub>                                       | c <sub>5</sub>      | z <sub>4</sub> | c <sub>6</sub>  | z <sub>5</sub>     | z <sub>6</sub> | c <sub>7</sub>           | z <sub>7</sub>      | z <sup>+++</sup> <sub>15</sub>   | c <sup>+++</sup> <sub>16</sub> | c <sup>+++</sup> <sub>17</sub> | c <sup>+++</sup> <sub>18</sub> | z <sup>+++</sup> <sub>19</sub> | z <sup>+++</sup> <sub>20</sub> | c <sup>+++</sup> <sub>21</sub> | y <sup>+++</sup> <sub>21</sub> | c <sup>+</sup> <sub>15</sub> |         |         |
| Delta Da                | -0.37          |                | -0.34          | 0.03             | 0.08           | 0.09                                                 | 0.11                | 0.22           | 0.18            | 0.19               | 0.04           | 0.11                     | 0.33                | 0.58                             | 0.51                           | 0.17                           | 0.71                           | 0.71                           | 0.72                           | 0.60                           |                                | -0.08                        |         |         |

# Peak 158

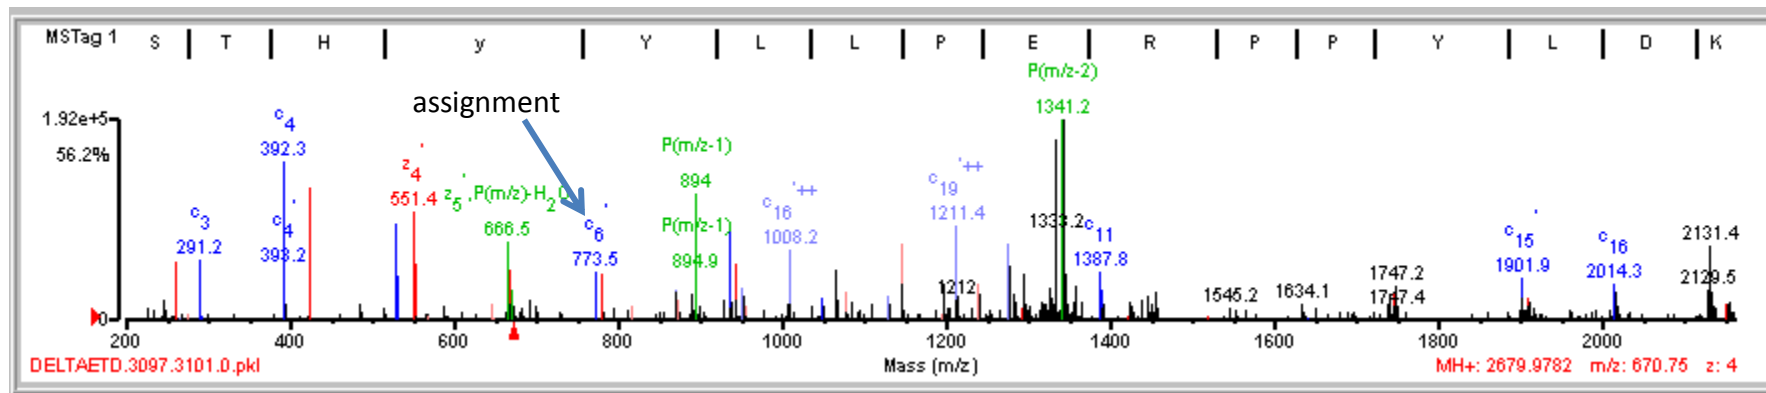

| Rank | Score                   | SPI (%)                     | BCS            | # Unmatched Ions | Variable sites              | Sequence                                                              | MH <sup>+</sup> Calculated (Da) | MH <sup>+</sup> Error (Da) | MH <sup>+</sup> Error (ppm) | Protein MW/pI (Da) | Species                     | Accession #                   | MS-Digest Index #             | Protein Name                     |                               |                               |                               |                               |                              |                 |                 |                 |                 |         |       |
|------|-------------------------|-----------------------------|----------------|------------------|-----------------------------|-----------------------------------------------------------------------|---------------------------------|----------------------------|-----------------------------|--------------------|-----------------------------|-------------------------------|-------------------------------|----------------------------------|-------------------------------|-------------------------------|-------------------------------|-------------------------------|------------------------------|-----------------|-----------------|-----------------|-----------------|---------|-------|
| 1    | 16.78                   | 94.2                        | 14             | 2/24             | Y394y                       | (K) V S / S I T H \ Y \ L L P E I R P P I Y I L D I K / Y I E \ K (F) | 2598.32                         | 81.6543                    | 629.8                       | 50560.3/8.38       | Homo sapiens                | <a href="#">10047086</a>      | <a href="#">949</a>           | mitogen-inducible gene 6 protein |                               |                               |                               |                               |                              |                 |                 |                 |                 |         |       |
|      | Fragment-ion (m/z)      | 260.03                      | 291.17         | 392.28           | 423.31                      | 529.36                                                                | 551.45                          | 772.40                     | 779.73                      | 935.54             | 943.72                      | 1065.59                       | 1145.08                       | 1196.04                          | 1211.35                       | 1239.50                       | 1275.37                       | 1294.20                       | 1387.83                      | 1739.56         | 1747.18         | 1901.94         | 2014.32         | 2131.39 |       |
|      | Frac. Inten. (% of TIC) | 2.53                        | 2.49           | 8.00             | 5.66                        | 4.97                                                                  | 5.99                            | 2.70                       | 4.21                        | 6.68               | 2.95                        | 3.38                          | 4.46                          | 4.86                             | 2.58                          | 5.57                          | 3.50                          | 7.18                          | 4.40                         | 3.54            | 2.48            | 2.59            | 3.09            | 2.95    | 3.21  |
|      | Rel. Inten. (% of BP)   | 31.66                       | 31.09          | 100.00           | 70.73                       | 62.16                                                                 | 74.90                           | 33.80                      | 52.55                       | 83.49              | 36.84                       | 42.27                         | 55.77                         | 60.78                            | 32.24                         | 69.63                         | 43.76                         | 89.75                         | 54.92                        | 44.26           | 31.01           | 32.38           | 38.64           | 36.83   | 40.11 |
|      | Score                   | 1.00                        | 1.00           | 1.00             | 1.00                        | 1.00                                                                  | 1.00                            | 1.00                       | 1.00                        | 1.00               | 0.25                        | 1.00                          | 1.00                          | 1.00                             | 0.25                          | 1.00                          | 0.25                          | 1.00                          | 0.25                         | 1.00            | 0.25            | -0.32           | 0.25            | 1.00    | -0.40 |
|      | Ion-type                | z <sub>2</sub> <sup>+</sup> | c <sub>3</sub> | c <sub>4</sub>   | z <sub>3</sub> <sup>+</sup> | c <sub>5</sub>                                                        | z <sub>4</sub> <sup>+</sup>     | c <sub>6</sub>             | z <sub>6</sub> <sup>+</sup> | c <sub>7</sub>     | z <sub>7</sub> <sup>+</sup> | c <sub>16</sub> <sup>++</sup> | c <sub>17</sub> <sup>++</sup> | z <sub>17</sub> <sup>++</sup>    | z <sub>18</sub> <sup>++</sup> | c <sub>19</sub> <sup>++</sup> | z <sub>19</sub> <sup>++</sup> | c <sub>20</sub> <sup>++</sup> | z <sub>10</sub> <sup>+</sup> | c <sub>11</sub> | c <sub>14</sub> | c <sub>15</sub> | c <sub>16</sub> |         |       |
|      | Delta Da                | -0.11                       | 0.00           | 0.07             | 0.11                        | 0.09                                                                  | 0.16                            | 0.10                       | 0.32                        | 0.17               | 0.24                        | 0.69                          | 0.58                          | 0.53                             | 0.46                          | 0.76                          | 0.41                          | 0.26                          | 0.52                         | 0.20            | 0.72            | 0.03            | 0.34            |         |       |

# Peak 159

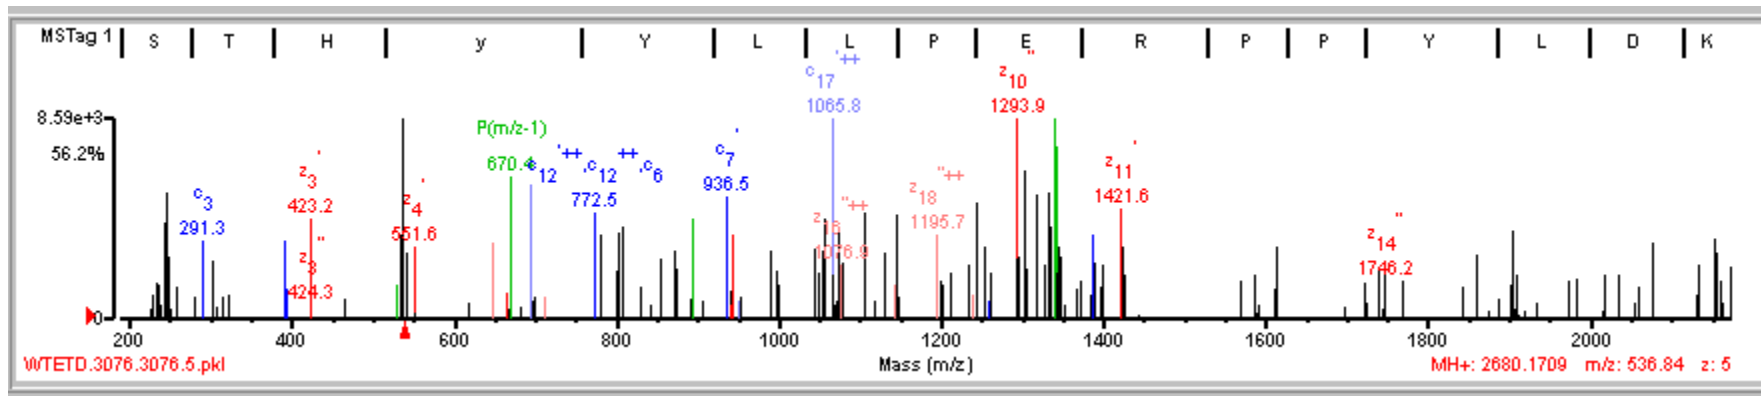

| Rank                    | Score  | SPI (%)        | BCS             | # Unmatched Ions | Variable sites                | Sequence                                                        | MH <sup>+</sup> Calculated (Da) | MH <sup>+</sup> Error (Da) | MH <sup>+</sup> Error (ppm)   | Protein MW/pI (Da) | Species                       | Accession #              | MS-Digest Index #             | Protein Name                     |         |         |                               |         |         |                 |         |                  |                               |
|-------------------------|--------|----------------|-----------------|------------------|-------------------------------|-----------------------------------------------------------------|---------------------------------|----------------------------|-------------------------------|--------------------|-------------------------------|--------------------------|-------------------------------|----------------------------------|---------|---------|-------------------------------|---------|---------|-----------------|---------|------------------|-------------------------------|
| 1                       | 6.11   | 61.6           | 8               | 10/23            | Y394y                         | (K) V S S T H / Y \ Y \ L L P / E   R P P Y L D   K   Y E K (F) | 2598.32                         | 81.8470                    | 701.7                         | 50560.3/8.38       | Homo sapiens                  | <a href="#">10047086</a> | <a href="#">949</a>           | mitogen-inducible gene 6 protein |         |         |                               |         |         |                 |         |                  |                               |
| Fragment-ion (m/z)      | 246.96 | 392.09         | 423.21          | 551.60           | 694.09                        | 772.46                                                          | 801.91                          | 936.46                     | 1065.79                       | 1074.61            | 1076.93                       | 1107.44                  | 1130.08                       | 1146.65                          | 1245.04 | 1253.64 | 1293.93                       | 1304.04 | 1319.44 | 1388.00         | 1390.09 | 1421.59          | 2152.72                       |
| Frac. Inten. (% of TIC) | 3.92   | 3.39           | 3.52            | 4.26             | 4.15                          | 6.37                                                            | 4.22                            | 3.79                       | 6.54                          | 4.31               | 3.42                          | 3.25                     | 3.62                          | 3.91                             | 3.60    | 3.51    | 12.21                         | 4.59    | 3.81    | 3.18            | 3.25    | 3.89             | 3.29                          |
| Rel. Inten. (% of BP)   | 32.09  | 27.73          | 28.83           | 34.92            | 34.02                         | 52.16                                                           | 34.52                           | 31.05                      | 53.59                         | 35.32              | 28.05                         | 26.65                    | 29.66                         | 31.98                            | 29.49   | 28.71   | 100.00                        | 37.55   | 31.16   | 26.01           | 26.61   | 31.84            | 26.97                         |
| Score                   | -0.32  | 1.00           | 1.00            | 1.00             | 1.00                          | 1.00                                                            | -0.35                           | 0.25                       | 1.00                          | -0.35              | 0.25                          | -0.27                    | 0.25                          | -0.32                            | -0.29   | -0.29   | 0.25                          | -0.38   | -0.31   | 1.00            | -0.27   | 1.00             | 0.25                          |
| Ion-type                |        | c <sub>4</sub> | z' <sub>3</sub> | z' <sub>4</sub>  | c <sup>++</sup> <sub>11</sub> | c <sub>6</sub>                                                  |                                 | c' <sub>7</sub>            | c <sup>++</sup> <sub>17</sub> |                    | z <sup>++</sup> <sub>16</sub> |                          | c <sup>++</sup> <sub>18</sub> |                                  |         |         | z <sup>++</sup> <sub>10</sub> |         |         | c <sub>11</sub> |         | z' <sub>11</sub> | z <sup>++</sup> <sub>16</sub> |
| Delta Da                |        | -0.12          | 0.01            | 0.31             | -0.23                         | 0.16                                                            |                                 | 0.09                       | 0.78                          |                    | 0.41                          |                          | 0.52                          |                                  |         |         | 0.25                          |         |         | 0.37            |         | -0.13            | 0.68                          |











# Peak 164

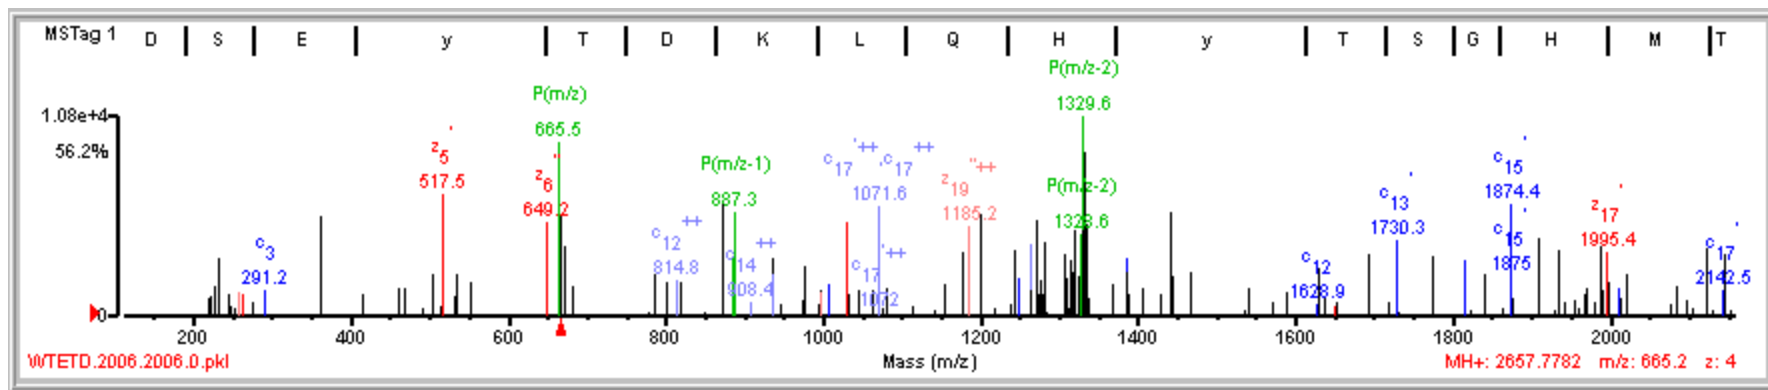

| Rank | Score | SPI (%) | BCS | # Unmatched Ions | Variable sites | Sequence                                            | MH <sup>+</sup> Calculated (Da) | MH <sup>+</sup> Error (Da) | MH <sup>+</sup> Error (ppm) | Protein MW/pI (Da) | Species      | Accession #               | MS-Digest Index #     | Protein Name                              |
|------|-------|---------|-----|------------------|----------------|-----------------------------------------------------|---------------------------------|----------------------------|-----------------------------|--------------------|--------------|---------------------------|-----------------------|-------------------------------------------|
| 1    | 6.52  | 71.2    | 10  | 5/17             | Y577y Y584y    | (R) A D S/E y/T D K L Q H y/T\S G\H/M T P G\M\K (I) | 2497.11                         | 160.6659                   | 275.9                       | 109874.7/5.45      | Homo sapiens | <a href="#">111118978</a> | <a href="#">16297</a> | ephrin receptor EphB2 isoform 1 precursor |
| 1    | 6.52  | 71.2    | 10  | 5/17             | Y578y Y585y    | (R) A D S/E y/T D K L Q H y/T\S G\H/M T P G\M\K (I) | 2497.11                         | 160.6659                   | 275.9                       | 110030.9/5.49      | Homo sapiens | <a href="#">21396504</a>  | <a href="#">23887</a> | ephrin receptor EphB2 isoform 2 precursor |

| Fragment-ion (m/z)      | 363.08 | 517.51                      | 649.18                       | 1030.44                       | 1071.63                       | 1185.24                        | 1199.90                        | 1243.12 | 1265.10                        | 1272.84                      | 1334.70 | 1386.71                      | 1443.22 | 1730.26                      | 1874.39                      | 1988.36 | 1995.44                      |
|-------------------------|--------|-----------------------------|------------------------------|-------------------------------|-------------------------------|--------------------------------|--------------------------------|---------|--------------------------------|------------------------------|---------|------------------------------|---------|------------------------------|------------------------------|---------|------------------------------|
| Frac. Inten. (% of TIC) | 5.85   | 7.06                        | 5.47                         | 5.40                          | 6.58                          | 5.19                           | 5.85                           | 6.29    | 5.73                           | 5.60                         | 5.37    | 5.98                         | 6.04    | 4.73                         | 8.92                         | 5.26    | 4.69                         |
| Rel. Inten. (% of BP)   | 65.56  | 79.24                       | 61.31                        | 60.59                         | 73.78                         | 58.27                          | 65.62                          | 70.52   | 64.32                          | 62.80                        | 60.26   | 67.03                        | 67.77   | 53.03                        | 100.00                       | 58.99   | 52.58                        |
| Score                   | -0.66  | 1.00                        | 0.25                         | 1.00                          | 1.00                          | 1.00                           | 0.25                           | -0.71   | 1.00                           | 1.00                         | -0.60   | 0.25                         | -0.68   | 1.00                         | 1.00                         | -0.59   | 1.00                         |
| Ion-type                |        | z <sub>5</sub> <sup>+</sup> | z <sub>6</sub> <sup>++</sup> | z <sub>10</sub> <sup>++</sup> | c <sub>17</sub> <sup>++</sup> | z <sub>19</sub> <sup>+++</sup> | c <sub>20</sub> <sup>+++</sup> |         | c <sub>21</sub> <sup>+++</sup> | z <sub>11</sub> <sup>+</sup> |         | c <sub>11</sub> <sup>+</sup> |         | c <sub>13</sub> <sup>+</sup> | c <sub>15</sub> <sup>+</sup> |         | z <sub>17</sub> <sup>+</sup> |
| Delta Da                |        | 0.25                        | -0.12                        | -0.02                         | 0.22                          | 0.77                           | 0.43                           |         | 0.61                           | -0.65                        |         | 0.13                         |         | 0.61                         | 0.69                         |         | -0.42                        |

# Peak 165

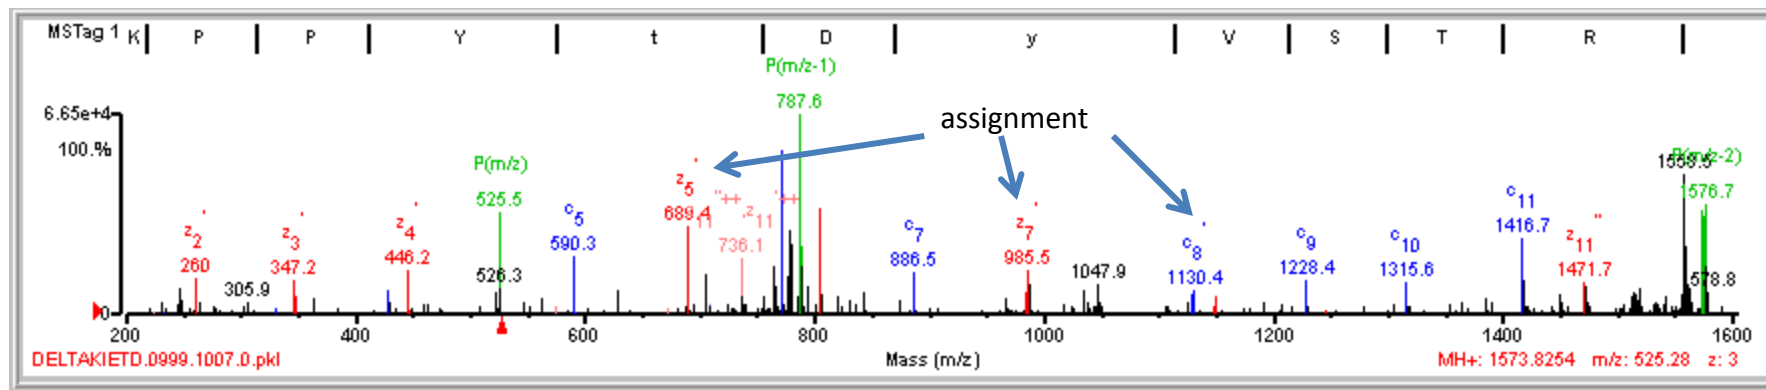

| Rank                   | Score          | SPI (%)        | BCS            | # Unmatched Ions | Variable sites                             | Sequence       | MH <sup>+</sup> Calculated (Da) | MH <sup>+</sup> Error (Da) | MH <sup>+</sup> Error (ppm) | Protein MW/pl (Da) | Species                  | Accession #           | MS-Digest Index #                | Protein Name   |         |                |                |                 |                 |                 |         |
|------------------------|----------------|----------------|----------------|------------------|--------------------------------------------|----------------|---------------------------------|----------------------------|-----------------------------|--------------------|--------------------------|-----------------------|----------------------------------|----------------|---------|----------------|----------------|-----------------|-----------------|-----------------|---------|
| 1                      | 14.61          | 87.4           | 9              | 4/21             | T157tY159y (R) S/Q P P\Y t/D y V S T\R (W) | 1413.66        | 160.1610                        | 145.1                      | 70581.2/9.67                | Homo sapiens       | <a href="#">11496279</a> | <a href="#">26083</a> | male germ cell-associated kinase |                |         |                |                |                 |                 |                 |         |
| Fragment-ion (m/z)     | 260.02         | 347.15         | 427.38         | 446.25           | 590.27                                     | 689.10         | 689.44                          | 705.65                     | 736.08                      | 765.10             | 804.30                   | 842.48                | 886.54                           | 985.48         | 1047.94 | 1129.51        | 1228.44        | 1315.57         | 1416.68         | 1471.66         | 1473.32 |
| Frac. Inten.(% of TIC) | 2.69           | 3.71           | 2.34           | 3.75             | 4.30                                       | 2.60           | 8.39                            | 3.61                       | 5.08                        | 3.32               | 12.63                    | 3.14                  | 5.81                             | 3.74           | 2.90    | 3.26           | 2.92           | 4.59            | 14.28           | 3.65            | 3.28    |
| Rel. Inten.(% of BP)   | 18.82          | 25.99          | 16.40          | 26.27            | 30.14                                      | 18.22          | 58.74                           | 25.29                      | 35.54                       | 23.23              | 88.43                    | 22.01                 | 40.70                            | 26.18          | 20.31   | 22.83          | 20.48          | 32.11           | 100.00          | 25.57           | 22.97   |
| Score                  | 1.00           | 1.00           | 1.00           | 1.00             | 1.00                                       | 1.00           | 1.00                            | 0.25                       | 1.00                        | -0.23              | 1.00                     | -0.22                 | 1.00                             | 1.00           | -0.20   | 1.00           | 1.00           | 1.00            | 1.00            | 0.25            | -0.23   |
| Ion-type               | z <sub>2</sub> | z <sub>3</sub> | c <sub>4</sub> | z <sub>4</sub>   | c <sub>5</sub>                             | z <sub>5</sub> | z <sub>5</sub>                  | y <sub>5</sub>             | z <sub>++11</sub>           |                    | z <sub>6</sub>           |                       | c <sub>7</sub>                   | z <sub>7</sub> |         | c <sub>8</sub> | c <sub>9</sub> | c <sub>10</sub> | c <sub>11</sub> | z <sub>11</sub> |         |
| Delta Da               | -0.13          | -0.03          | 0.15           | 0.00             | -0.02                                      | -0.18          | 0.16                            | 0.35                       | 0.30                        |                    | -0.00                    |                       | 0.21                             | 0.16           |         | 0.15           | 0.01           | 0.11            | 0.17            | 0.11            |         |



# Peak 167

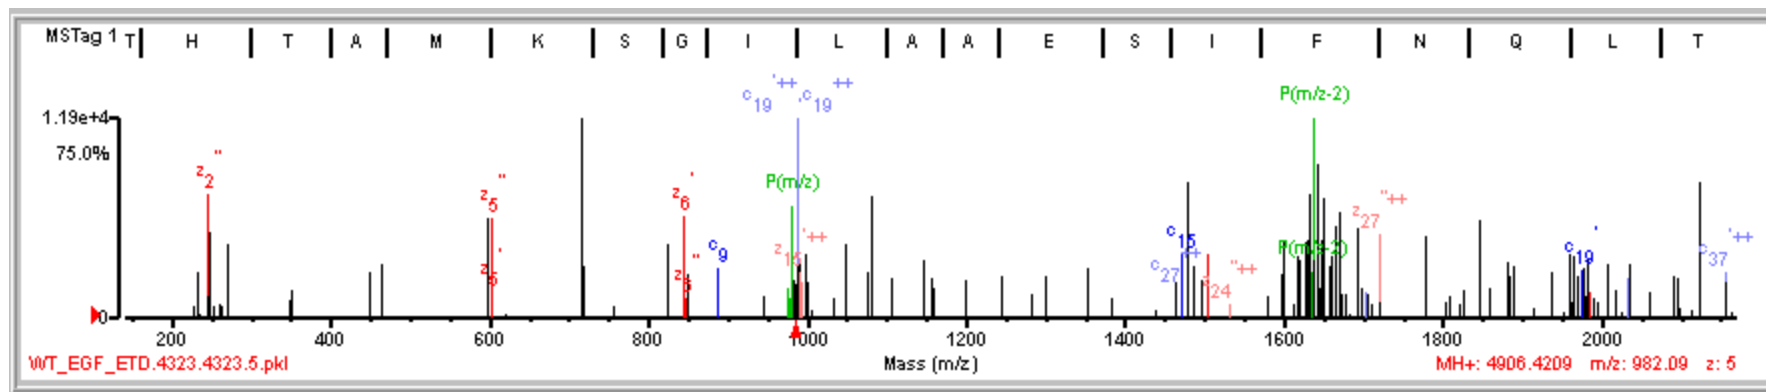

| Rank                    | Score            | SPI (%)          | BCS    | # Unmatched Ions | Variable sites              | Sequence                                                                                         | MH* Calculated (Da)         | MH* Error (Da)    | MH* Error (ppm) | Protein MW/pI (Da) | Species           | Accession #               | MS-Digest Index #     | Protein Name                                               |         |                   |         |                   |                 |                 |                   |                   |         |
|-------------------------|------------------|------------------|--------|------------------|-----------------------------|--------------------------------------------------------------------------------------------------|-----------------------------|-------------------|-----------------|--------------------|-------------------|---------------------------|-----------------------|------------------------------------------------------------|---------|-------------------|---------|-------------------|-----------------|-----------------|-------------------|-------------------|---------|
| 1                       | 9.48             | 71.0             | 12     | 7/23             | T427t T433t Y435y S425s     | (K)G T H T A N/K/S G I L A A E S / I / F N/Q/L T S E N L Q/s K t I I G L H V t/E/y/E/D N/L K (N) | 4589.32                     | 317.1017          | -563.3          | 68495.8/7.31       | Homo sapiens      | <a href="#">119703746</a> | <a href="#">31549</a> | electron-transferring-flavoprotein dehydrogenase precursor |         |                   |         |                   |                 |                 |                   |                   |         |
| Fragment-ion (m/z)      | 245.17           | 248.84           | 464.23 | 598.88           | 603.30                      | 717.48                                                                                           | 845.31                      | 988.43            | 990.73          | 1080.25            | 1147.12           | 1480.01                   | 1643.77               | 1649.09                                                    | 1666.38 | 1671.34           | 1693.11 | 1720.45           | 1846.46         | 1975.44         | 2033.77           | 2124.96           | 2155.71 |
| Frac. Inten. (% of TIC) | 4.88             | 2.86             | 3.05   | 3.33             | 3.33                        | 10.47                                                                                            | 4.02                        | 8.39              | 4.52            | 4.07               | 3.24              | 4.48                      | 6.14                  | 5.94                                                       | 3.05    | 4.33              | 2.98    | 3.39              | 3.22            | 3.07            | 3.95              | 4.51              | 2.74    |
| Rel. Inten. (% of BP)   | 46.57            | 27.33            | 29.16  | 31.83            | 31.83                       | 100.00                                                                                           | 38.37                       | 80.07             | 43.13           | 38.89              | 30.96             | 42.82                     | 58.63                 | 56.76                                                      | 29.14   | 41.39             | 28.49   | 32.40             | 30.77           | 29.34           | 37.74             | 43.07             | 26.13   |
| Score                   | 0.25             | 1.00             | -0.29  | -0.32            | 0.25                        | 1.00                                                                                             | 1.00                        | 1.00              | 0.25            | 0.25               | 1.00              | 1.00                      | -0.59                 | -0.57                                                      | -0.29   | 0.25              | -0.28   | 1.00              | 1.00            | 1.00            | 1.00              | -0.43             | 1.00    |
| Ion-type                | y++ <sub>4</sub> | c3+ <sub>7</sub> |        |                  | z <sup>-</sup> <sub>5</sub> | z3+ <sub>16</sub>                                                                                | y++ <sub>13</sub>           | c++ <sub>19</sub> | y <sub>7</sub>  | c3+ <sub>29</sub>  | z3+ <sub>27</sub> | c3+ <sub>38</sub>         |                       |                                                            |         | y++ <sub>28</sub> |         | z++ <sub>27</sub> | c <sub>18</sub> | c <sub>19</sub> | c++ <sub>36</sub> | c++ <sub>37</sub> |         |
| Delta Da                | 0.03             | 0.04             |        |                  | 0.00                        | -0.13                                                                                            | -0.55                       | 0.42              | 0.35            | 0.41               | 0.30              | 0.02                      |                       |                                                            |         | 0.15              |         | 0.72              | -0.49           | 0.43            | 0.33              | 0.75              |         |
|                         |                  |                  |        |                  |                             |                                                                                                  | z <sup>-</sup> <sub>6</sub> |                   |                 |                    |                   |                           |                       |                                                            |         |                   |         |                   |                 |                 |                   | y++ <sub>38</sub> | -0.26   |



# Peak 168

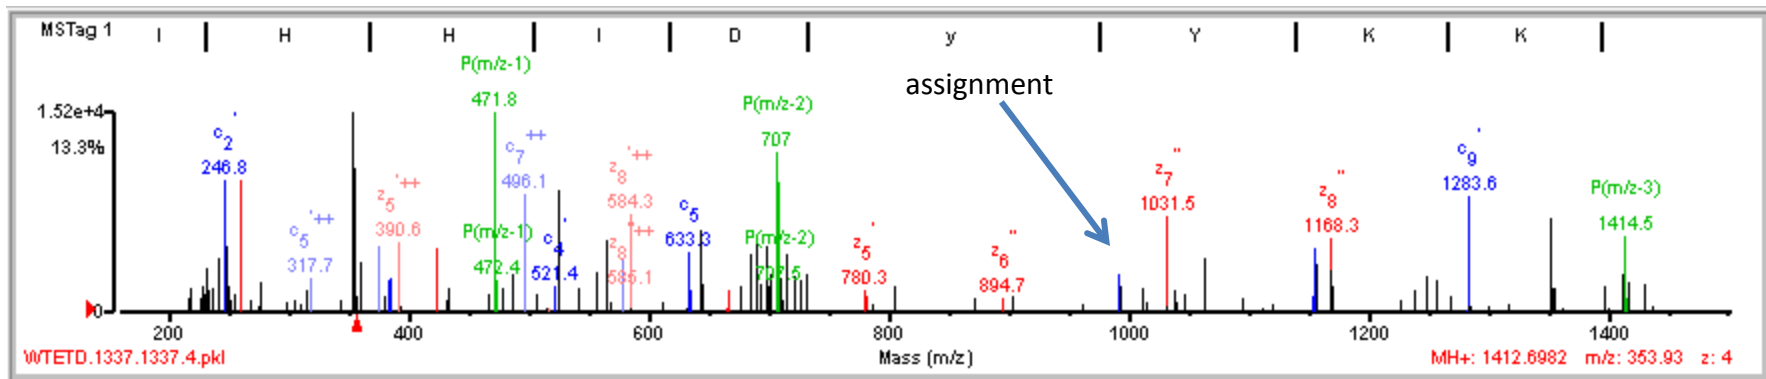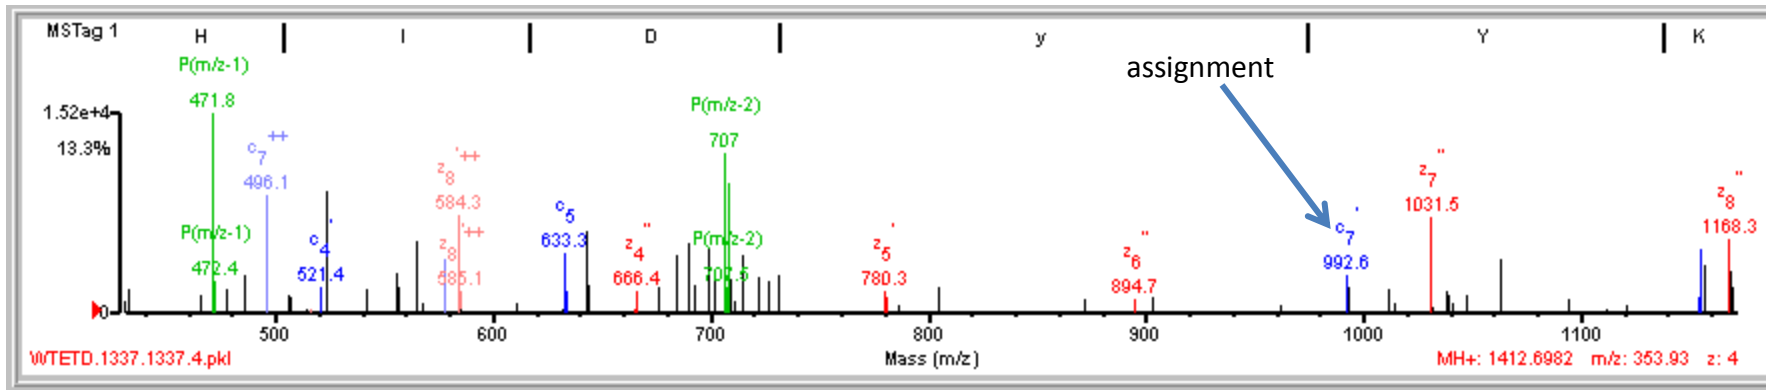

| Rank | Score | SPI (%) | BCS | # Unmatched Ions | Variable sites | Sequence                      | MH <sup>+</sup> Calculated (Da) | MH <sup>+</sup> Error (Da) | MH <sup>+</sup> Error (ppm) | Protein MW/pl (Da) | Species      | Accession #               | MS-Digest Index #     | Protein Name                                            |
|------|-------|---------|-----|------------------|----------------|-------------------------------|---------------------------------|----------------------------|-----------------------------|--------------------|--------------|---------------------------|-----------------------|---------------------------------------------------------|
| 1    | 10.49 | 80.5    | 7   | 6/22             | Y653y          | (R) D I H I H I D Y Y K K (T) | 1331.67                         | 81.0239                    | 748.6                       | 87434.1/5.65       | Homo sapiens | <a href="#">13186249</a>  | <a href="#">12071</a> | fibroblast growth factor receptor 1 isoform 9 precursor |
| 1    | 10.49 | 80.5    | 7   | 6/22             | Y653y          | (R) D I H I H I D Y Y K K (T) | 1331.67                         | 81.0239                    | 748.6                       | 91868.3/5.82       | Homo sapiens | <a href="#">105990522</a> | <a href="#">13740</a> | fibroblast growth factor receptor 1 isoform 1 precursor |
| 1    | 10.49 | 80.5    | 7   | 6/22             | Y564y          | (R) D I H I H I D Y Y K K (T) | 1331.67                         | 81.0239                    | 748.6                       | 82162.6/6.19       | Homo sapiens | <a href="#">13186234</a>  | <a href="#">14477</a> | fibroblast growth factor receptor 1 isoform 3 precursor |
| 1    | 10.49 | 80.5    | 7   | 6/22             | Y651y          | (R) D I H I H I D Y Y K K (T) | 1331.67                         | 81.0239                    | 748.6                       | 91580.9/5.77       | Homo sapiens | <a href="#">13186251</a>  | <a href="#">15462</a> | fibroblast growth factor receptor 1 isoform 2 precursor |
| 1    | 10.49 | 80.5    | 7   | 6/22             | Y562y          | (R) D I H I H I D Y Y K K (T) | 1331.67                         | 81.0239                    | 748.6                       | 81875.2/6.12       | Homo sapiens | <a href="#">13186236</a>  | <a href="#">31335</a> | fibroblast growth factor receptor 1 isoform 4 precursor |

| Fragment-ion (m/z)     | 231.63 | 246.85         | 259.09         | 374.84                       | 383.03         | 390.62                       | 422.25         | 496.12                       | 524.21                       | 555.71 | 564.86 | 577.80                       | 584.26                       | 633.34         | 643.30 | 684.28 | 715.14 | 992.58         | 1031.46                     | 1155.67        | 1168.26        | 1283.62        |
|------------------------|--------|----------------|----------------|------------------------------|----------------|------------------------------|----------------|------------------------------|------------------------------|--------|--------|------------------------------|------------------------------|----------------|--------|--------|--------|----------------|-----------------------------|----------------|----------------|----------------|
| Frac. Inten.(% of TIC) | 3.47   | 11.08          | 9.55           | 2.93                         | 2.92           | 3.04                         | 3.36           | 5.15                         | 5.30                         | 2.95   | 3.14   | 2.42                         | 5.47                         | 3.59           | 4.85   | 2.53   | 2.55   | 2.86           | 4.45                        | 6.35           | 6.29           | 5.74           |
| Rel. Inten.(% of BP)   | 31.33  | 100.00         | 86.24          | 26.41                        | 26.34          | 27.46                        | 30.33          | 46.51                        | 47.87                        | 26.66  | 28.32  | 21.83                        | 49.41                        | 32.45          | 43.76  | 22.82  | 23.03  | 25.84          | 40.18                       | 57.32          | 56.82          | 51.81          |
| Score                  | -0.31  | 1.00           | 1.00           | 1.00                         | 1.00           | 1.00                         | 1.00           | 1.00                         | 0.25                         | -0.27  | -0.28  | 1.00                         | 1.00                         | 1.00           | -0.44  | -0.23  | -0.23  | 0.25           | 0.25                        | 0.25           | 1.00           | 0.25           |
| Ion-type               |        | c <sub>2</sub> | z <sub>2</sub> | c <sup>++</sup> <sub>6</sub> | c <sub>3</sub> | z <sup>++</sup> <sub>5</sub> | z <sub>3</sub> | c <sup>++</sup> <sub>7</sub> | y <sup>++</sup> <sub>7</sub> |        |        | c <sup>++</sup> <sub>8</sub> | z <sup>++</sup> <sub>8</sub> | c <sub>5</sub> |        |        |        | c <sub>7</sub> | z <sup>+</sup> <sub>7</sub> | c <sub>8</sub> | z <sub>8</sub> | c <sub>9</sub> |
| Delta Da               |        | 0.71           | -0.10          | 0.15                         | -0.17          | -0.04                        | -0.00          | -0.09                        | 0.47                         |        |        | 0.06                         | 0.00                         | -0.01          |        |        |        | 0.17           | 0.00                        | 0.20           | 0.75           | 0.05           |

# Peak 170

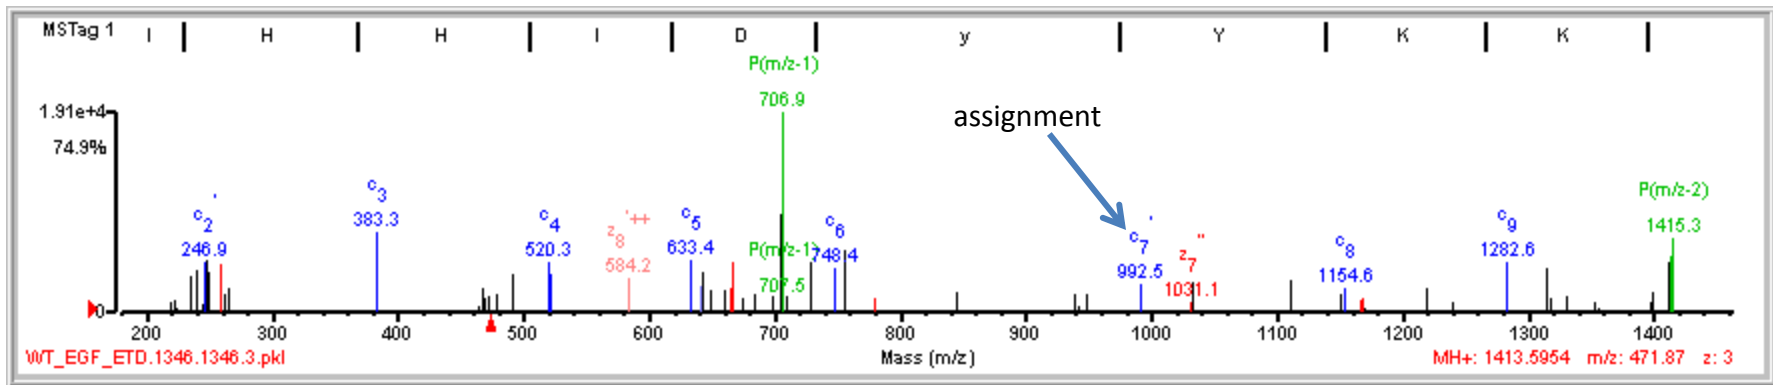

| Rank | Score | SPI (%) | BCS | # Unmatched Ions | Variable sites | Sequence                      | MH <sup>+</sup> Calculated (Da) | MH <sup>+</sup> Error (Da) | MH <sup>+</sup> Error (ppm) | Protein MW/pI (Da) | Species      | Accession #               | MS-Digest Index #     | Protein Name                                            |
|------|-------|---------|-----|------------------|----------------|-------------------------------|---------------------------------|----------------------------|-----------------------------|--------------------|--------------|---------------------------|-----------------------|---------------------------------------------------------|
| 1    | 9.27  | 61.0    | 9   | 9/23             | Y653y          | (R) D/I H\H I\D  Y\Y  K\K (T) | 1331.67                         | 81.9212                    | 1382.9                      | 87434.1/5.65       | Homo sapiens | <a href="#">13186249</a>  | <a href="#">12071</a> | fibroblast growth factor receptor 1 isoform 9 precursor |
| 1    | 9.27  | 61.0    | 9   | 9/23             | Y653y          | (R) D/I H\H I\D  Y\Y  K\K (T) | 1331.67                         | 81.9212                    | 1382.9                      | 91868.3/5.82       | Homo sapiens | <a href="#">105990522</a> | <a href="#">13740</a> | fibroblast growth factor receptor 1 isoform 1 precursor |
| 1    | 9.27  | 61.0    | 9   | 9/23             | Y564y          | (R) D/I H\H I\D  Y\Y  K\K (T) | 1331.67                         | 81.9212                    | 1382.9                      | 82162.6/6.19       | Homo sapiens | <a href="#">13186234</a>  | <a href="#">14477</a> | fibroblast growth factor receptor 1 isoform 3 precursor |
| 1    | 9.27  | 61.0    | 9   | 9/23             | Y651y          | (R) D/I H\H I\D  Y\Y  K\K (T) | 1331.67                         | 81.9212                    | 1382.9                      | 91580.9/5.77       | Homo sapiens | <a href="#">13186251</a>  | <a href="#">15462</a> | fibroblast growth factor receptor 1 isoform 2 precursor |
| 1    | 9.27  | 61.0    | 9   | 9/23             | Y562y          | (R) D/I H\H I\D  Y\Y  K\K (T) | 1331.67                         | 81.9212                    | 1382.9                      | 81875.2/6.12       | Homo sapiens | <a href="#">13186236</a>  | <a href="#">31335</a> | fibroblast growth factor receptor 1 isoform 4 precursor |

| Fragment-ion (m/z)     | 234.61 | 240.24 | 246.87         | 248.66 | 259.15          | 383.26         | 491.05 | 520.27         | 584.19            | 633.44         | 641.84           | 665.43          | 666.37           | 728.44 | 748.39         | 755.71 | 991.85         | 1032.63 | 1110.67 | 1154.60        | 1167.68         | 1282.56        | 1314.87 |
|------------------------|--------|--------|----------------|--------|-----------------|----------------|--------|----------------|-------------------|----------------|------------------|-----------------|------------------|--------|----------------|--------|----------------|---------|---------|----------------|-----------------|----------------|---------|
| Frac. Inten.(% of TIC) | 3.05   | 3.64   | 4.36           | 9.80   | 4.03            | 6.81           | 3.30   | 7.46           | 2.99              | 4.46           | 5.65             | 2.10            | 4.34             | 4.35   | 3.74           | 5.25   | 4.33           | 2.60    | 3.28    | 2.11           | 2.80            | 5.84           | 3.71    |
| Rel. Inten.(% of BP)   | 31.14  | 37.11  | 44.44          | 100.00 | 41.16           | 69.45          | 33.65  | 76.08          | 30.52             | 45.48          | 57.70            | 21.46           | 44.28            | 44.38  | 38.15          | 53.55  | 44.14          | 26.56   | 33.50   | 21.56          | 28.53           | 59.61          | 37.90   |
| Score                  | -0.31  | -0.37  | 1.00           | -1.00  | 1.00            | 1.00           | -0.34  | 1.00           | 1.00              | 1.00           | 1.00             | 1.00            | 0.25             | -0.44  | 1.00           | -0.54  | 1.00           | -0.27   | -0.34   | 1.00           | 1.00            | 1.00           | -0.38   |
| Ion-type               |        |        | c <sub>2</sub> |        | z' <sub>2</sub> | c <sub>3</sub> |        | c <sub>4</sub> | z''+ <sub>8</sub> | c <sub>5</sub> | c++ <sub>9</sub> | z' <sub>4</sub> | z'' <sub>4</sub> |        | c <sub>6</sub> |        | c <sub>7</sub> |         |         | c <sub>8</sub> | z' <sub>8</sub> | c <sub>9</sub> |         |
| Delta Da               |        |        | 0.73           |        | -0.04           | 0.06           |        | 0.01           | -0.07             | 0.09           |                  | 0.15            | 0.08             |        | 0.02           |        | 0.45           |         |         | 0.13           | 0.17            |                | -0.00   |

# Peak 171

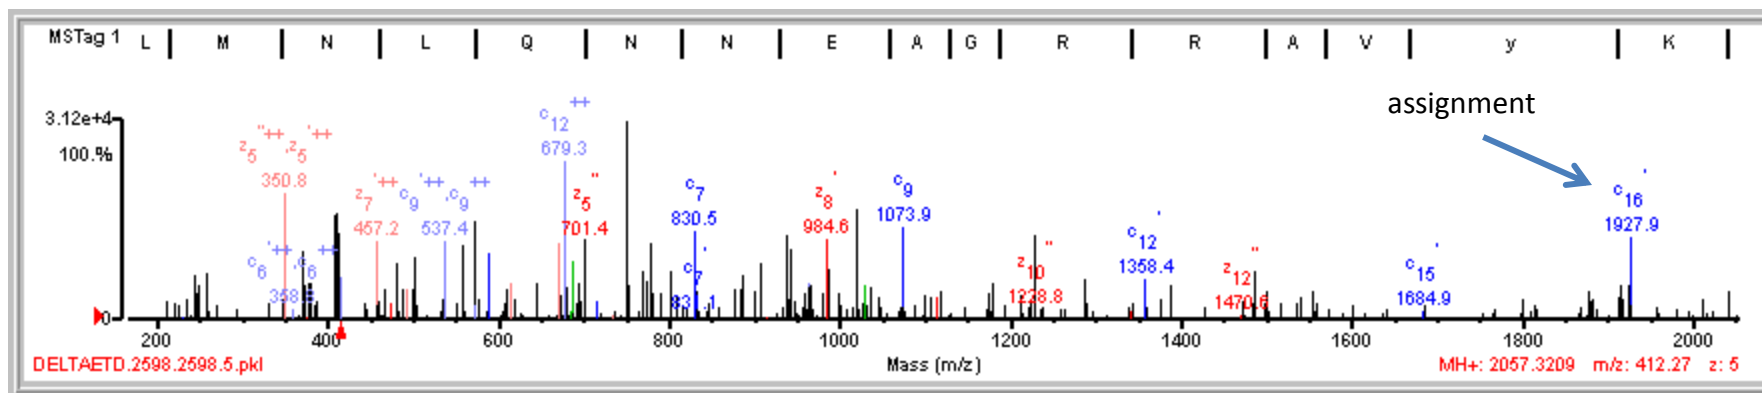

| Rank | Score | SPI (%) | BCS | # Unmatched Ions | Variable sites | Sequence                                                | MH <sup>+</sup> Calculated (Da) | MH <sup>+</sup> Error (Da) | MH <sup>+</sup> Error (ppm) | Protein MW/pl (Da) | Species      | Accession #              | MS-Digest Index #     | Protein Name                                                    |
|------|-------|---------|-----|------------------|----------------|---------------------------------------------------------|---------------------------------|----------------------------|-----------------------------|--------------------|--------------|--------------------------|-----------------------|-----------------------------------------------------------------|
| 1    | 9.67  | 73.5    | 7   | 4/18             | Y210y          | (R) V L M / N L Q / N   N / E   A   G R   R A V y K (M) | 1976.05                         | 81.2715                    | 634.4                       | 40323.5/8.80       | Homo sapiens | <a href="#">14249180</a> | <a href="#">5098</a>  | wingless-type MMTV integration site family, member 5B precursor |
| 1    | 9.67  | 73.5    | 7   | 4/18             | Y210y          | (R) V L M / N L Q / N   N / E   A   G R   R A V y K (M) | 1976.05                         | 81.2715                    | 634.4                       | 40323.5/8.80       | Homo sapiens | <a href="#">17402919</a> | <a href="#">37657</a> | wingless-type MMTV integration site family, member 5B precursor |

| Fragment-ion (m/z)      | 350.83           | 372.27           | 457.24           | 537.45           | 558.39            | 572.31             | 671.54             | 701.39         | 750.97 | 778.44 | 830.53         | 884.94 | 938.95 | 984.55         | 1073.90        | 1228.07         | 1357.34         | 1927.89         |
|-------------------------|------------------|------------------|------------------|------------------|-------------------|--------------------|--------------------|----------------|--------|--------|----------------|--------|--------|----------------|----------------|-----------------|-----------------|-----------------|
| Frac. Inten. (% of TIC) | 5.58             | 4.59             | 4.98             | 3.46             | 6.17              | 5.09               | 3.70               | 8.24           | 12.75  | 5.33   | 4.15           | 3.84   | 4.63   | 9.50           | 5.12           | 4.77            | 3.88            | 4.23            |
| Rel. Inten. (% of BP)   | 43.79            | 35.99            | 39.07            | 27.14            | 48.35             | 39.88              | 29.05              | 64.60          | 100.00 | 41.78  | 32.53          | 30.13  | 36.28  | 74.50          | 40.15          | 37.41           | 30.46           | 33.14           |
| Score                   | 1.00             | 1.00             | 1.00             | 1.00             | 0.25              | 1.00               | 1.00               | 0.25           | -1.00  | -0.42  | 1.00           | -0.30  | -0.36  | 1.00           | 1.00           | 1.00            | 1.00            | 0.25            |
| Ion-type                | z <sup>++5</sup> | z <sup>3+9</sup> | z <sup>++7</sup> | c <sup>++9</sup> | z <sup>+++9</sup> | c <sup>++10</sup>  | z <sup>+++11</sup> | z <sup>5</sup> |        |        | c <sub>7</sub> |        |        | z <sub>8</sub> | c <sub>9</sub> | z <sub>10</sub> | c <sub>12</sub> | c <sub>16</sub> |
| Delta Da                | 0.16             | 0.42             | 0.01             | 0.18             | 0.62              | -0.48              | 0.23               | 0.05           |        |        | 0.07           |        |        | 0.06           | 0.36           | 0.49            | -0.36           | -0.05           |
|                         |                  |                  |                  |                  |                   | y <sup>+++14</sup> |                    |                |        |        |                |        |        |                |                |                 | y <sub>11</sub> |                 |
|                         |                  |                  |                  |                  |                   | 0.70               |                    |                |        |        |                |        |        |                |                |                 | -0.30           |                 |

# Peak 172

assignment

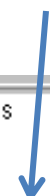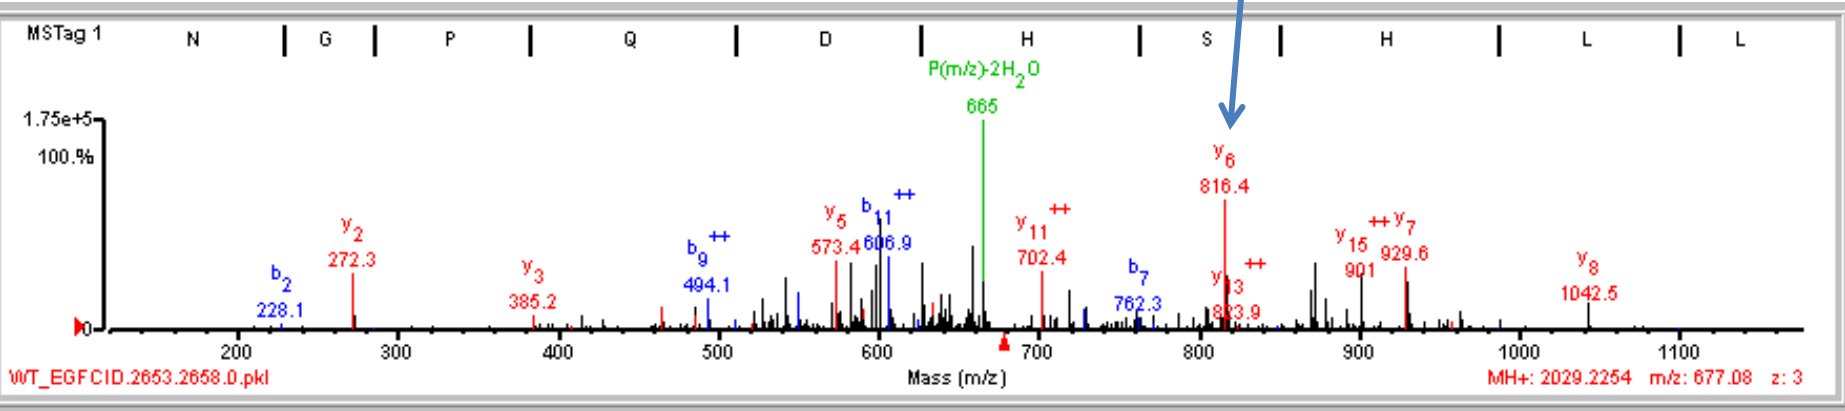

| Rank | Score | SPI (%) | BCS | # Unmatched Ions | Variable sites | Sequence                                  | MH <sup>+</sup> Calculated (Da) | MH <sup>+</sup> Error (Da) | MH <sup>+</sup> Error (ppm) | Protein MW/pi (Da) | Species      | Accession #               | MS-Digest Index #     | Protein Name                  |
|------|-------|---------|-----|------------------|----------------|-------------------------------------------|---------------------------------|----------------------------|-----------------------------|--------------------|--------------|---------------------------|-----------------------|-------------------------------|
| 1    | 14.87 | 73.9    | 10  | 7/25             | Y96y           | (K) L/N/G/P Q D/H/S H/L L Y S T I/P R (M) | 1948.00                         | 81.2219                    | 618.7                       | 104156.3/6.49      | Homo sapiens | <a href="#">146231942</a> | <a href="#">452</a>   | catenin, delta 1 isoform 1A   |
| 1    | 14.87 | 73.9    | 10  | 7/25             | Y96y           | (K) L/N/G/P Q D/H/S H/L L Y S T I/P R (M) | 1948.00                         | 81.2219                    | 618.7                       | 108170.6/5.86      | Homo sapiens | <a href="#">146231940</a> | <a href="#">30706</a> | catenin, delta 1 isoform 1ABC |
| 1    | 14.87 | 73.9    | 10  | 7/25             | Y96y           | (K) L/N/G/P Q D/H/S H/L L Y S T I/P R (M) | 1948.00                         | 81.2219                    | 618.7                       | 107349.7/5.90      | Homo sapiens | <a href="#">146231962</a> | <a href="#">31626</a> | catenin, delta 1 isoform 1AB  |
| 1    | 14.87 | 73.9    | 10  | 7/25             | Y96y           | (K) L/N/G/P Q D/H/S H/L L Y S T I/P R (M) | 1948.00                         | 81.2219                    | 618.7                       | 104959.0/5.89      | Homo sapiens | <a href="#">10835010</a>  | <a href="#">33563</a> | catenin, delta 1 isoform 1B   |
| 1    | 14.87 | 73.9    | 10  | 7/25             | Y96y           | (K) L/N/G/P Q D/H/S H/L L Y S T I/P R (M) | 1948.00                         | 81.2219                    | 618.7                       | 104156.3/6.49      | Homo sapiens | <a href="#">146231938</a> | <a href="#">34647</a> | catenin, delta 1 isoform 1A   |
| 1    | 14.87 | 73.9    | 10  | 7/25             | Y96y           | (K) L/N/G/P Q D/H/S H/L L Y S T I/P R (M) | 1948.00                         | 81.2219                    | 618.7                       | 104156.3/6.49      | Homo sapiens | <a href="#">146231968</a> | <a href="#">36000</a> | catenin, delta 1 isoform 1A   |

| Fragment-ion (m/z)     | 272.26         | 485.27 | 527.80 | 541.83                                           | 550.50                         | 573.36         | 582.13                         | 589.35 | 598.73 | 601.36                         | 606.87                         | 627.62 | 633.90                         | 639.04                         | 644.57 | 659.13 | 702.44                         | 719.74                                           | 729.09                         | 816.45         | 870.09 | 872.94                         | 901.42                         | 929.56         | 1042.53        |
|------------------------|----------------|--------|--------|--------------------------------------------------|--------------------------------|----------------|--------------------------------|--------|--------|--------------------------------|--------------------------------|--------|--------------------------------|--------------------------------|--------|--------|--------------------------------|--------------------------------------------------|--------------------------------|----------------|--------|--------------------------------|--------------------------------|----------------|----------------|
| Frac. Inten.(% of TIC) | 3.79           | 3.06   | 2.70   | 3.11                                             | 2.57                           | 4.16           | 3.73                           | 3.83   | 3.16   | 7.76                           | 5.64                           | 5.01   | 2.33                           | 3.05                           | 0.09   | 5.44   | 4.11                           | 2.69                                             | 2.57                           | 9.89           | 2.85   | 3.90                           | 5.38                           | 6.40           | 2.78           |
| Rel. Inten.(% of BP)   | 38.28          | 30.91  | 27.31  | 31.48                                            | 25.99                          | 42.09          | 37.74                          | 38.77  | 31.90  | 78.43                          | 57.00                          | 50.65  | 23.60                          | 30.85                          | 0.86   | 55.06  | 41.57                          | 27.24                                            | 26.03                          | 100.00         | 28.86  | 39.40                          | 54.39                          | 64.68          | 28.09          |
| Score                  | 1.00           | -0.31  | -0.27  | 0.50                                             | 1.00                           | 1.00           | 1.00                           | -0.39  | -0.32  | 1.00                           | 1.00                           | -0.51  | 1.00                           | 1.00                           | 1.50   | -0.55  | 1.00                           | 0.50                                             | 1.00                           | 1.00           | -0.29  | 1.00                           | 1.00                           | 1.00           | 1.00           |
| Ion-type               | y <sub>2</sub> |        |        | b <sup>+++</sup> <sub>10</sub> -H <sub>2</sub> O | b <sup>+++</sup> <sub>10</sub> | y <sub>5</sub> | y <sup>+++</sup> <sub>14</sub> |        |        | y <sup>+++</sup> <sub>15</sub> | b <sup>+++</sup> <sub>11</sub> |        | y <sup>+++</sup> <sub>10</sub> | y <sup>+++</sup> <sub>16</sub> | sty    |        | y <sup>+++</sup> <sub>11</sub> | b <sup>+++</sup> <sub>12</sub> -H <sub>2</sub> O | b <sup>+++</sup> <sub>12</sub> | y <sub>6</sub> |        | y <sup>+++</sup> <sub>14</sub> | y <sup>+++</sup> <sub>15</sub> | y <sub>7</sub> | y <sub>8</sub> |
| Delta Da               | 0.09           |        |        | 0.57                                             | 0.23                           | 0.02           | 0.18                           |        |        | 0.41                           | 0.06                           |        | 0.08                           | 0.07                           | 0.57   |        | 0.09                           | 0.42                                             | 0.77                           | 0.08           |        | 0.53                           | 0.49                           | 0.11           | -0.00          |

# Peak 173

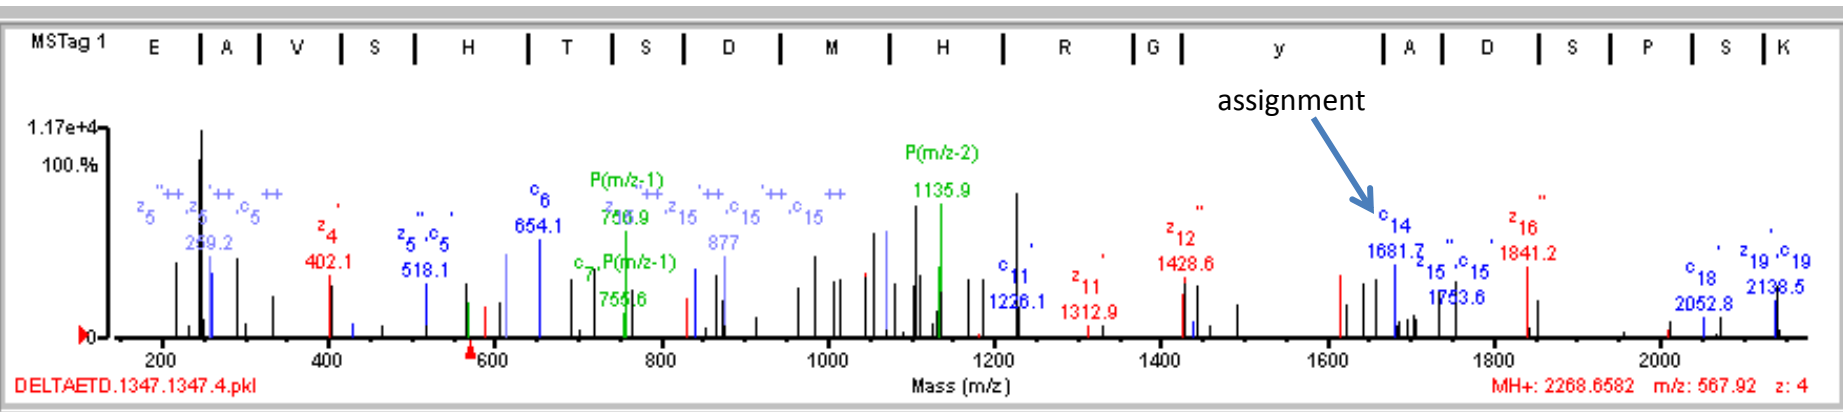

| Rank | Score | SPI (%) | BCS | # Unmatched Ions | Variable sites | Sequence                                        | MH <sup>+</sup> Calculated (Da) | MH <sup>+</sup> Error (Da) | MH <sup>+</sup> Error (ppm) | Protein MW/pi (Da) | Species      | Accession #               | MS-Digest Index #     | Protein Name                        |
|------|-------|---------|-----|------------------|----------------|-------------------------------------------------|---------------------------------|----------------------------|-----------------------------|--------------------|--------------|---------------------------|-----------------------|-------------------------------------|
| 1    | 9.44  | 59.6    | 12  | 8/25             | Y31y           | (R) L/E A V/S H/T S/D M/H R G/y A/D/S P/S/K (A) | 2188.01                         | 80.6494                    | 301.1                       | 51673.3/8.07       | Homo sapiens | <a href="#">157649073</a> | <a href="#">17330</a> | adenylyl cyclase-associated protein |
| 1    | 9.44  | 59.6    | 12  | 8/25             | Y31y           | (R) L/E A V/S H/T S/D M/H R G/y A/D/S P/S/K (A) | 2188.01                         | 80.6494                    | 301.1                       | 51673.3/8.07       | Homo sapiens | <a href="#">5453595</a>   | <a href="#">36052</a> | adenylyl cyclase-associated protein |

  

| Fragment-ion (m/z)      | 217.56                      | 246.13 | 248.74 | 259.17                       | 291.04 | 402.06                      | 518.11                      | 588.03                      | 613.25                        | 654.11                      | 720.92                        | 842.31                         | 865.52 | 876.95                         | 984.25 | 1045.49                     | 1054.72 | 1070.61                        | 1111.54 | 1227.87 | 1427.27                      | 1616.87                       | 1681.68                      | 1841.15                       | 2138.49                      |       |
|-------------------------|-----------------------------|--------|--------|------------------------------|--------|-----------------------------|-----------------------------|-----------------------------|-------------------------------|-----------------------------|-------------------------------|--------------------------------|--------|--------------------------------|--------|-----------------------------|---------|--------------------------------|---------|---------|------------------------------|-------------------------------|------------------------------|-------------------------------|------------------------------|-------|
| Frac. Inten. (% of TIC) | 3.04                        | 8.14   | 10.59  | 5.99                         | 3.23   | 3.62                        | 2.80                        | 2.55                        | 3.36                          | 3.98                        | 2.77                          | 2.77                           | 2.51   | 3.90                           | 3.34   | 5.07                        | 4.20    | 4.67                           | 2.53    | 5.82    | 4.26                         | 2.54                          | 2.99                         | 2.85                          | 2.47                         |       |
| Rel. Inten. (% of BP)   | 28.72                       | 76.84  | 100.00 | 56.60                        | 30.53  | 34.16                       | 26.43                       | 24.10                       | 31.77                         | 37.57                       | 26.19                         | 26.14                          | 23.73  | 36.81                          | 31.52  | 47.91                       | 39.64   | 44.15                          | 23.92   | 54.98   | 40.20                        | 24.02                         | 28.25                        | 26.90                         | 23.36                        |       |
| Score                   | 1.00                        | -0.77  | -1.00  | 1.00                         | -0.31  | 1.00                        | 0.25                        | 1.00                        | 1.00                          | 1.00                        | 0.25                          | 1.00                           | -0.24  | 1.00                           | -0.32  | 0.25                        | -0.40   | 1.00                           | -0.24   | -0.55   | 1.00                         | 0.25                          | 1.00                         | 0.25                          | 1.00                         |       |
| Ion-type                | z <sub>2</sub> <sup>+</sup> |        |        | z <sub>5</sub> <sup>++</sup> |        | z <sub>4</sub> <sup>+</sup> | c <sub>5</sub> <sup>+</sup> | z <sub>6</sub> <sup>+</sup> | c <sub>11</sub> <sup>++</sup> | c <sub>6</sub> <sup>+</sup> | c <sub>13</sub> <sup>++</sup> | c <sub>8</sub> <sup>+</sup>    |        | c <sub>15</sub> <sup>++</sup>  |        | z <sub>9</sub> <sup>+</sup> |         | c <sub>19</sub> <sup>++</sup>  |         |         | z <sub>12</sub> <sup>+</sup> | z <sub>14</sub> <sup>++</sup> | c <sub>14</sub> <sup>+</sup> | z <sub>16</sub> <sup>++</sup> | c <sub>19</sub> <sup>+</sup> |       |
| Delta Da                | -0.57                       |        |        | 0.05                         |        | -0.15                       | -0.20                       | -0.24                       | -0.04                         | -0.25                       | 0.57                          | -0.13                          |        | 0.07                           |        | 0.05                        |         | 0.66                           |         |         | -0.28                        | 0.23                          | -0.04                        | 0.42                          | -0.41                        |       |
|                         |                             |        |        |                              |        |                             | z <sub>5</sub> <sup>+</sup> |                             |                               |                             |                               | c <sub>14</sub> <sup>+++</sup> |        | z <sub>15</sub> <sup>+++</sup> |        |                             |         | z <sub>19</sub> <sup>+++</sup> |         |         |                              |                               |                              |                               | z <sub>19</sub> <sup>+</sup> | -0.38 |

# Peak 174

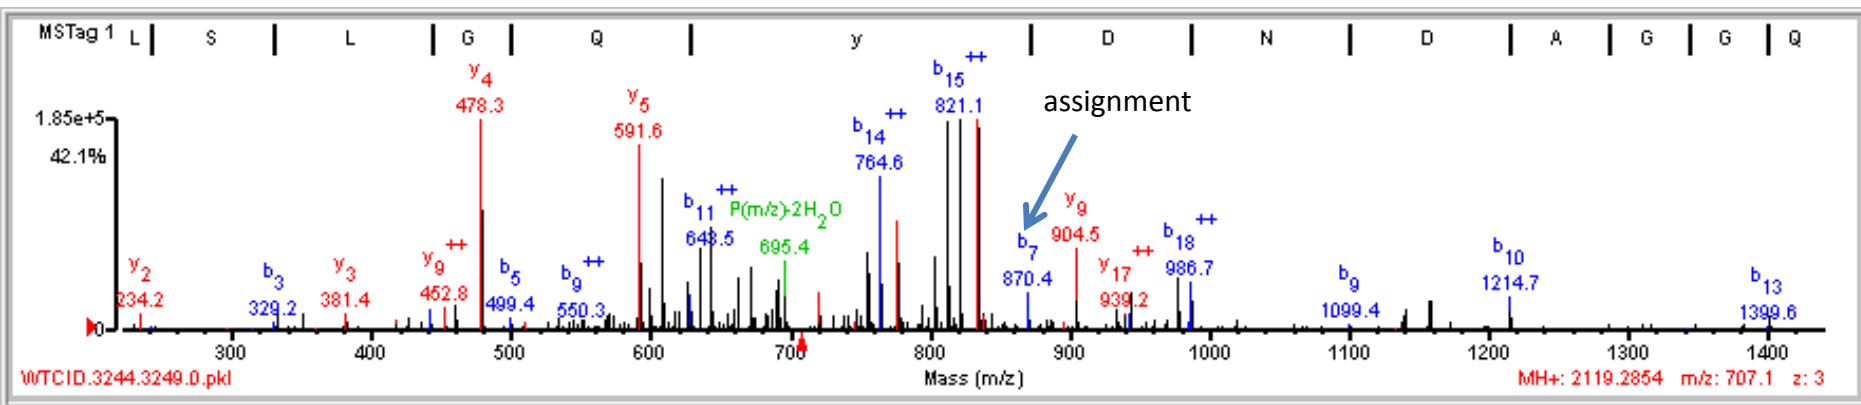

| Rank | Score | SPI (%) | BCS | # Unmatched Ions | Variable sites | Sequence                                       | MH <sup>+</sup> Calculated (Da) | MH <sup>+</sup> Error (Da) | MH <sup>+</sup> Error (ppm) | Protein MW/pl (Da) | Species      | Accession #               | MS-Digest Index #     | Protein Name                   |
|------|-------|---------|-----|------------------|----------------|------------------------------------------------|---------------------------------|----------------------------|-----------------------------|--------------------|--------------|---------------------------|-----------------------|--------------------------------|
| 1    | 17.57 | 93.7    | 8   | 4/25             | Y255y          | (R)K L S L G Q/Y\ D N D  A G G Q L P F S\K (C) | 2038.02                         | 81.2615                    | 611.1                       | 97939.3/6.41       | Homo sapiens | <a href="#">169171407</a> | <a href="#">13944</a> | PREDICTED: similar to tensin 3 |
| 1    | 17.57 | 93.7    | 8   | 4/25             | Y780y          | (R)K L S L G Q/Y\ D N D  A G G Q L P F S\K (C) | 2038.02                         | 81.2615                    | 611.1                       | 155266.4/6.34      | Homo sapiens | <a href="#">65288071</a>  | <a href="#">34866</a> | tensin 3                       |

| Fragment-ion (m/z)      | 478.34         | 591.55         | 599.25         | 608.21                         | 625.85 | 634.95                                           | 643.52                         | 643.81                         | 663.30                                           | 672.12                         | 691.76 | 746.99                         | 755.77                                           | 764.56                         | 776.60 | 803.53 | 812.41                                           | 821.07                         | 833.49         | 870.44         | 904.52         | 977.97                                           | 986.74                         | 1157.47 | 1214.69         |
|-------------------------|----------------|----------------|----------------|--------------------------------|--------|--------------------------------------------------|--------------------------------|--------------------------------|--------------------------------------------------|--------------------------------|--------|--------------------------------|--------------------------------------------------|--------------------------------|--------|--------|--------------------------------------------------|--------------------------------|----------------|----------------|----------------|--------------------------------------------------|--------------------------------|---------|-----------------|
| Frac. Inten. (% of TIC) | 12.75          | 5.55           | 1.18           | 5.00                           | 1.23   | 2.98                                             | 1.55                           | 3.18                           | 1.11                                             | 2.53                           | 1.29   | 1.16                           | 3.66                                             | 5.29                           | 3.93   | 2.50   | 7.38                                             | 13.19                          | 14.82          | 1.12           | 2.53           | 1.48                                             | 1.98                           | 1.30    | 1.31            |
| Rel. Inten. (% of BP)   | 86.02          | 37.45          | 8.00           | 33.73                          | 8.27   | 20.08                                            | 10.43                          | 21.45                          | 7.50                                             | 17.05                          | 8.71   | 7.82                           | 24.71                                            | 35.69                          | 26.54  | 16.90  | 49.80                                            | 89.04                          | 100.00         | 7.57           | 17.05          | 10.02                                            | 13.36                          | 8.78    | 8.87            |
| Score                   | 1.00           | 1.00           | 0.50           | 1.00                           | -0.08  | 0.50                                             | 1.00                           | 1.00                           | 0.50                                             | 1.00                           | -0.09  | 1.00                           | 0.50                                             | 1.00                           | 1.00   | -0.17  | 0.50                                             | 1.00                           | 1.00           | 1.00           | 1.00           | 0.50                                             | 1.00                           | -0.09   | 1.00            |
| Ion-type                | y <sub>2</sub> | y <sub>3</sub> | a <sub>6</sub> | b <sup>+++</sup> <sub>10</sub> |        | b <sup>+++</sup> <sub>11</sub> -H <sub>2</sub> O | b <sup>+++</sup> <sub>11</sub> | b <sup>+++</sup> <sub>11</sub> | b <sup>+++</sup> <sub>12</sub> -H <sub>2</sub> O | b <sup>+++</sup> <sub>12</sub> |        | y <sup>+++</sup> <sub>13</sub> | b <sup>+++</sup> <sub>14</sub> -H <sub>2</sub> O | b <sup>+++</sup> <sub>14</sub> |        |        | b <sup>+++</sup> <sub>15</sub> -H <sub>2</sub> O | b <sup>+++</sup> <sub>15</sub> | y <sub>8</sub> | b <sub>7</sub> | y <sub>9</sub> | b <sup>+++</sup> <sub>18</sub> -H <sub>2</sub> O | b <sup>+++</sup> <sub>18</sub> |         | b <sub>10</sub> |
| Delta Da                | 0.07           | 0.20           | -0.14          | 0.45                           |        | 0.68                                             | 0.24                           | 0.53                           | 0.52                                             | 0.33                           |        | 0.68                           | 0.45                                             | 0.23                           | 0.17   |        | 0.55                                             | 0.20                           | 0.04           | 0.03           | 0.03           | 0.53                                             | 0.29                           |         | 0.18            |

# Peak 175

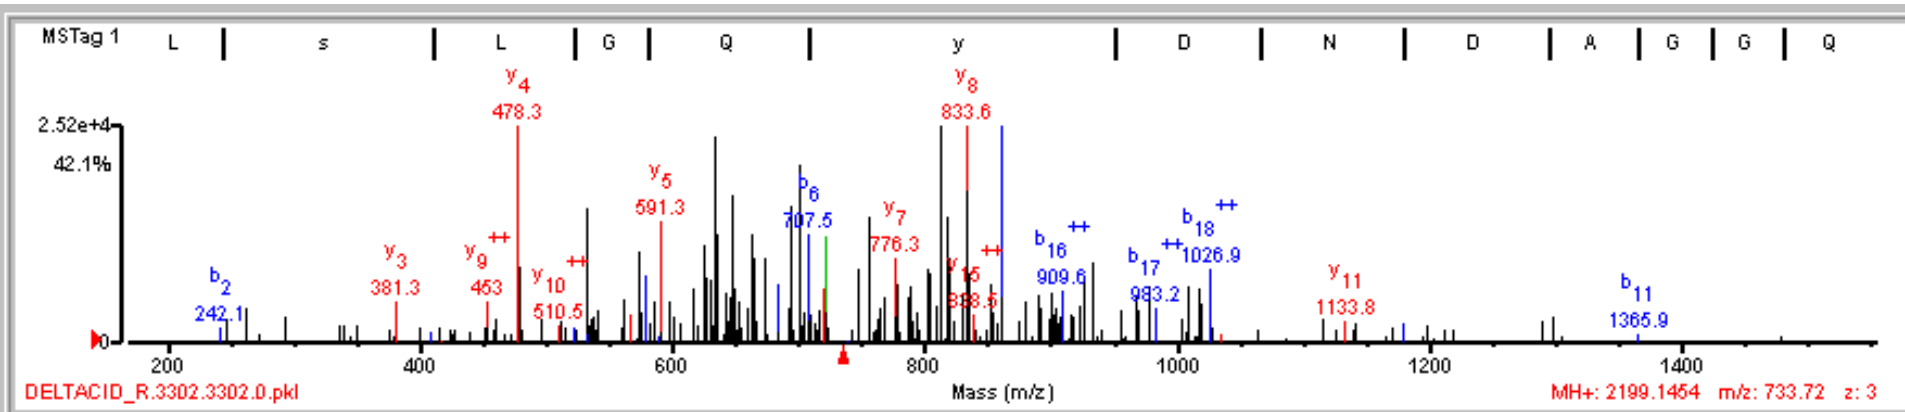

| Rank | Score | SPI (%) | BCS | # Unmatched Ions | Variable sites | Sequence                                     | MH <sup>+</sup> Calculated (Da) | MH <sup>+</sup> Error (Da) | MH <sup>+</sup> Error (ppm) | Protein MW/pi (Da) | Species      | Accession #               | MS-Digest Index #     | Protein Name                   |
|------|-------|---------|-----|------------------|----------------|----------------------------------------------|---------------------------------|----------------------------|-----------------------------|--------------------|--------------|---------------------------|-----------------------|--------------------------------|
| 1    | 11.40 | 61.5    | 9   | 8/23             | Y255y S251s    | (R)K L s L G Q Y/D\N D\A/G/G Q/L P F S\K (C) | 2038.02                         | 161.1215                   | 540.6                       | 97939.3/6.41       | Homo sapiens | <a href="#">169171407</a> | <a href="#">13944</a> | PREDICTED: similar to tensin 3 |
| 1    | 11.40 | 61.5    | 9   | 8/23             | Y780y S776s    | (R)K L s L G Q Y/D\N D\A/G/G Q/L P F S\K (C) | 2038.02                         | 161.1215                   | 540.6                       | 155266.4/6.34      | Homo sapiens | <a href="#">65288071</a>  | <a href="#">34866</a> | tensin 3                       |

| Fragment-ion (m/z)      | 478.33         | 532.43                       | 573.47                           | 591.28         | 625.26                        | 634.38 | 648.38                        | 662.75 | 664.88 | 673.74 | 695.08 | 700.83                           | 707.52         | 747.08                        | 755.62 | 776.30         | 812.38 | 817.46 | 833.55         | 852.48                                          | 860.95                        | 925.94 | 1026.87                       |
|-------------------------|----------------|------------------------------|----------------------------------|----------------|-------------------------------|--------|-------------------------------|--------|--------|--------|--------|----------------------------------|----------------|-------------------------------|--------|----------------|--------|--------|----------------|-------------------------------------------------|-------------------------------|--------|-------------------------------|
| Frac. Inten. (% of TIC) | 13.51          | 3.22                         | 3.26                             | 2.98           | 2.21                          | 8.37   | 5.36                          | 3.35   | 2.42   | 2.97   | 0.11   | 0.16                             | 3.60           | 2.49                          | 2.84   | 2.53           | 12.37  | 3.72   | 10.87          | 2.00                                            | 7.18                          | 2.46   | 2.03                          |
| Rel. Inten. (% of BP)   | 100.00         | 23.86                        | 24.14                            | 22.05          | 16.35                         | 61.95  | 39.71                         | 24.81  | 17.93  | 21.97  | 0.78   | 1.19                             | 26.66          | 18.45                         | 21.00  | 18.70          | 91.55  | 27.54  | 80.51          | 14.82                                           | 53.16                         | 18.22  | 15.02                         |
| Score                   | 1.00           | 1.00                         | 0.50                             | 1.00           | 1.00                          | -0.62  | 1.00                          | -0.25  | -0.18  | -0.22  | 0.25   | 1.50                             | 1.00           | 1.00                          | -0.21  | 1.00           | -0.92  | -0.28  | 1.00           | 0.50                                            | 1.00                          | -0.18  | 1.00                          |
| Ion-type                | y <sub>4</sub> | b <sup>++</sup> <sub>8</sub> | y <sub>5</sub> -H <sub>2</sub> O | y <sub>5</sub> | y <sup>++</sup> <sub>12</sub> |        | b <sup>++</sup> <sub>10</sub> |        |        |        | st     | y <sub>6</sub> -H <sub>2</sub> O | b <sub>6</sub> | y <sup>++</sup> <sub>13</sub> |        | y <sub>7</sub> |        |        | y <sub>8</sub> | b <sup>++</sup> <sub>15</sub> -H <sub>2</sub> O | b <sup>++</sup> <sub>15</sub> |        | b <sup>++</sup> <sub>18</sub> |
| Delta Da                | 0.06           | -0.78                        | 0.13                             | -0.07          | 0.46                          |        | 0.64                          |        |        |        | 0.42   | -0.57                            | 0.17           | 0.77                          |        | -0.13          |        |        | 0.10           | 0.63                                            | 0.10                          |        | 0.44                          |
|                         |                |                              |                                  |                |                               |        |                               |        |        |        |        | 1.50                             | st             |                               |        |                |        |        |                | b <sub>7</sub> -H <sub>3</sub> PO <sub>4</sub>  |                               |        |                               |
|                         |                |                              |                                  |                |                               |        |                               |        |        |        |        | 0.17                             |                |                               |        |                |        |        |                | 0.08                                            |                               |        |                               |

# Peak 176

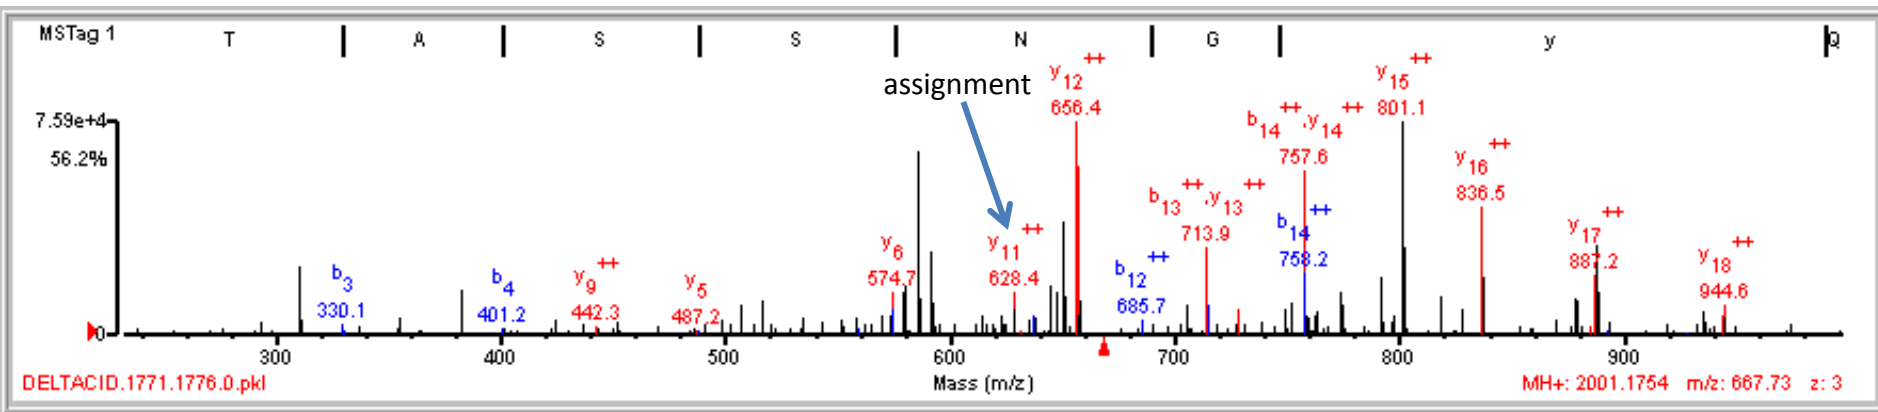

| Rank                   | Score  | SPI (%)                          | BCS            | # Unmatched Ions | Variable sites | Sequence                                        | MH <sup>+</sup> Calculated (Da)                  | MH <sup>+</sup> Error (Da)     | MH <sup>+</sup> Error (ppm) | Protein MW/pI (Da) | Species      | Accession #                                      | MS-Digest Index #              | Protein Name                                     |                                |        |        |                                                  |                                |                                |                                                  |                                |                                |                                                  |                                |
|------------------------|--------|----------------------------------|----------------|------------------|----------------|-------------------------------------------------|--------------------------------------------------|--------------------------------|-----------------------------|--------------------|--------------|--------------------------------------------------|--------------------------------|--------------------------------------------------|--------------------------------|--------|--------|--------------------------------------------------|--------------------------------|--------------------------------|--------------------------------------------------|--------------------------------|--------------------------------|--------------------------------------------------|--------------------------------|
| 1                      | 12.47  | 69.7                             | 9              | 8/25             | Y792y          | (R) L/D/T/A/S/S/N G/Y Q R/P G I/S/V V A A K (A) | 1920.98                                          | 80.1981                        | 115.8                       | 92466.6/8.34       | Homo sapiens | <a href="#">169202009</a>                        | <a href="#">9158</a>           | PREDICTED: hypothetical protein LOC143872        |                                |        |        |                                                  |                                |                                |                                                  |                                |                                |                                                  |                                |
| 1                      | 12.47  | 69.7                             | 9              | 8/25             | Y792y          | (R) L/D/T/A/S/S/N G/Y Q R/P G I/S/V V A A K (A) | 1920.98                                          | 80.1981                        | 115.8                       | 92466.6/8.34       | Homo sapiens | <a href="#">169203583</a>                        | <a href="#">18234</a>          | PREDICTED: similar to mCG142052 isoform 2        |                                |        |        |                                                  |                                |                                |                                                  |                                |                                |                                                  |                                |
| Fragment-ion (m/z)     | 311.05 | 383.16                           | 574.67         | 579.99           | 585.84         | 591.96                                          | 628.44                                           | 637.44                         | 644.60                      | 650.17             | 657.75       | 705.22                                           | 713.93                         | 748.84                                           | 757.62                         | 762.79 | 774.40 | 792.35                                           | 801.08                         | 836.52                         | 877.99                                           | 887.15                         | 887.65                         | 935.46                                           | 944.58                         |
| Frac. Inten.(% of TIC) | 2.67   | 1.45                             | 2.20           | 3.00             | 11.36          | 4.33                                            | 2.36                                             | 1.58                           | 1.57                        | 5.45               | 1.79         | 1.66                                             | 3.81                           | 1.80                                             | 8.79                           | 1.45   | 3.03   | 2.30                                             | 19.82                          | 7.52                           | 2.29                                             | 1.90                           | 4.72                           | 1.59                                             | 1.56                           |
| Rel. Inten.(% of BP)   | 13.49  | 7.32                             | 11.12          | 15.12            | 57.35          | 21.83                                           | 11.90                                            | 7.99                           | 7.92                        | 27.51              | 9.05         | 8.39                                             | 19.24                          | 9.06                                             | 44.37                          | 7.32   | 15.28  | 11.60                                            | 100.00                         | 37.97                          | 11.54                                            | 9.60                           | 23.81                          | 8.00                                             | 7.85                           |
| Score                  | -0.13  | 0.50                             | 1.00           | -0.15            | -0.57          | 1.00                                            | 1.00                                             | 1.00                           | -0.08                       | -0.28              | -0.09        | 0.50                                             | 1.00                           | 0.50                                             | 1.00                           | -0.07  | -0.15  | 0.50                                             | 1.00                           | 1.00                           | 0.50                                             | 1.00                           | 1.00                           | 0.50                                             | 1.00                           |
| Ion-type               |        | b <sub>4</sub> -H <sub>2</sub> O | b <sub>6</sub> |                  |                | y <sup>+++</sup> <sub>17</sub>                  | b <sup>+++</sup> <sub>11</sub> -H <sub>2</sub> O | b <sup>+++</sup> <sub>11</sub> |                             |                    |              | b <sup>+++</sup> <sub>13</sub> -H <sub>2</sub> O | b <sup>+++</sup> <sub>13</sub> | b <sup>+++</sup> <sub>14</sub> -H <sub>2</sub> O | b <sup>+++</sup> <sub>14</sub> |        |        | y <sup>+++</sup> <sub>15</sub> -H <sub>2</sub> O | y <sup>+++</sup> <sub>15</sub> | y <sup>+++</sup> <sub>16</sub> | y <sup>+++</sup> <sub>17</sub> -H <sub>2</sub> O | y <sup>+++</sup> <sub>17</sub> | y <sup>+++</sup> <sub>17</sub> | y <sup>+++</sup> <sub>18</sub> -H <sub>2</sub> O | y <sup>+++</sup> <sub>18</sub> |
| Delta Da               |        | -0.03                            |                |                  |                | 0.34                                            | 0.18                                             | 0.18                           |                             |                    |              | 0.38                                             | 0.08                           | 0.48                                             | 0.26                           |        |        | 0.48                                             | 0.20                           | 0.12                           | 0.08                                             | 0.23                           | 0.73                           | 0.03                                             | 0.15                           |









# Peak 180

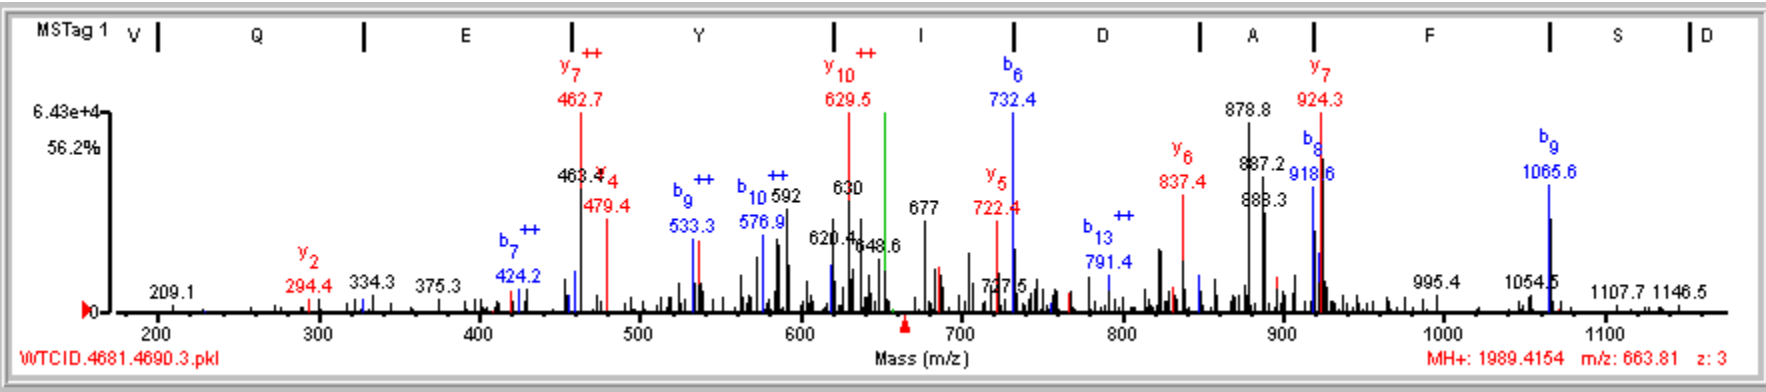

CID

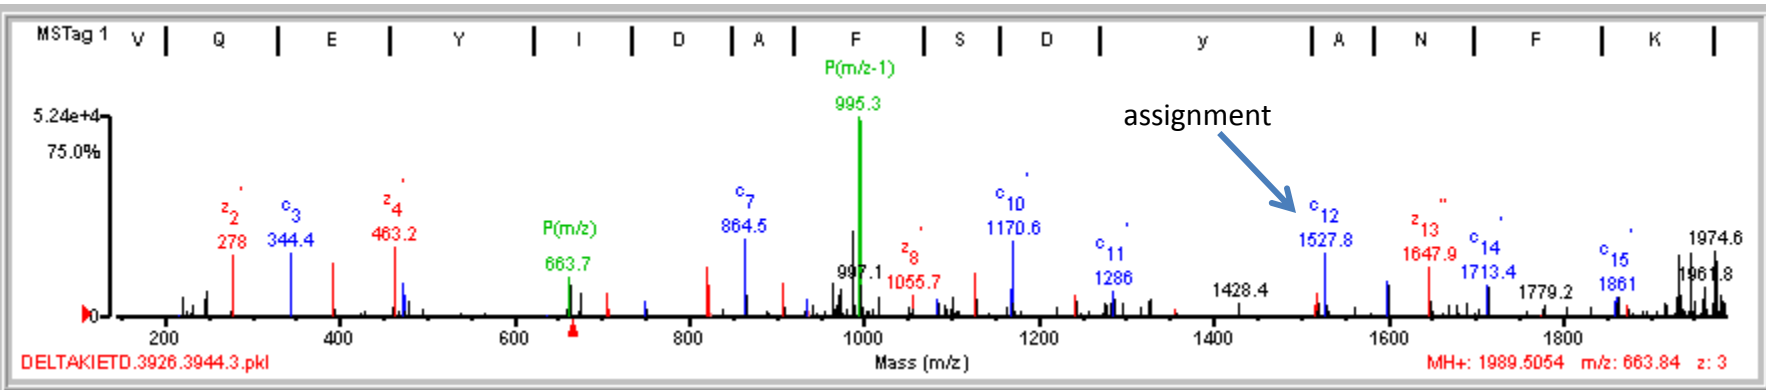

ETD

| Rank | Score | SPI (%) | BCS | # Unmatched Ions | Variable sites | Sequence                                              | MH <sup>+</sup> Calculated (Da) | MH <sup>+</sup> Error (Da) | MH <sup>+</sup> Error (ppm) | Protein MW/pl | Species      | Accession #              | MS-Digest Index #     | Protein Name                                                       |
|------|-------|---------|-----|------------------|----------------|-------------------------------------------------------|---------------------------------|----------------------------|-----------------------------|---------------|--------------|--------------------------|-----------------------|--------------------------------------------------------------------|
| 1    | 17.09 | 82.7    | 10  | 4/25             | Y789y          | (K) V V Q/E Y I I D A I F I S I D / y / A N F \ R (-) | 1908.90                         | 80.5140                    | 275.3                       | 89703.5/6.14  | Homo sapiens | <a href="#">18450371</a> | <a href="#">10043</a> | protein tyrosine phosphatase, receptor type, A isoform 2 precursor |
| 1    | 17.09 | 82.7    | 10  | 4/25             | Y798y          | (K) V V Q/E Y I I D A I F I S I D / y / A N F \ R (-) | 1908.90                         | 80.5140                    | 275.3                       | 90719.6/6.23  | Homo sapiens | <a href="#">4506303</a>  | <a href="#">13566</a> | protein tyrosine phosphatase, receptor type, A isoform 1 precursor |
| 1    | 17.09 | 82.7    | 10  | 4/25             | Y789y          | (K) V V Q/E Y I I D A I F I S I D / y / A N F \ R (-) | 1908.90                         | 80.5140                    | 275.3                       | 89703.5/6.14  | Homo sapiens | <a href="#">18450369</a> | <a href="#">14135</a> | protein tyrosine phosphatase, receptor type, A isoform 2 precursor |

| Fragment-ion (m/z)      | 462.71                          | 479.38         | 533.31           | 536.45           | 576.87            | 585.76 | 592.02         | 619.37         | 620.70                              | 629.51            | 638.04                              | 676.95            | 685.78         | 722.36         | 732.43                              | 822.93            | 831.82         | 837.39            | 848.38 | 878.79 | 887.23 | 918.56         | 922.23            | 924.30         | 1065.60        |      |
|-------------------------|---------------------------------|----------------|------------------|------------------|-------------------|--------|----------------|----------------|-------------------------------------|-------------------|-------------------------------------|-------------------|----------------|----------------|-------------------------------------|-------------------|----------------|-------------------|--------|--------|--------|----------------|-------------------|----------------|----------------|------|
| Frac. Inten. (% of TIC) | 10.26                           | 1.98           | 2.10             | 3.16             | 2.00              | 2.89   | 3.15           | 2.22           | 2.64                                | 9.57              | 2.01                                | 2.37              | 1.80           | 2.81           | 6.28                                | 2.75              | 1.55           | 4.10              | 1.72   | 5.58   | 6.78   | 4.75           | 2.27              | 10.39          | 4.85           |      |
| Rel. Inten. (% of BP)   | 98.71                           | 19.08          | 20.24            | 30.41            | 19.21             | 27.77  | 30.28          | 21.35          | 25.37                               | 92.12             | 19.38                               | 22.79             | 17.31          | 27.02          | 60.46                               | 26.48             | 14.94          | 39.40             | 16.58  | 53.71  | 65.27  | 45.68          | 21.87             | 100.00         | 46.64          |      |
| Score                   | 1.00                            | 1.00           | 1.00             | 1.00             | 1.00              | 1.00   | 0.25           | 1.00           | 0.50                                | 1.00              | -0.19                               | 0.50              | 1.00           | 1.00           | 1.00                                | 0.50              | 1.00           | 1.00              | 1.00   | -0.54  | -0.65  | 1.00           | 1.00              | 1.00           | 1.00           |      |
| Ion-type                | y <sup>++7</sup>                | y <sub>4</sub> | b <sup>++9</sup> | y <sup>++8</sup> | b <sup>++10</sup> |        | a <sub>5</sub> | b <sub>5</sub> | y <sup>++10</sup> -H <sub>2</sub> O | y <sup>++10</sup> | y <sup>++11</sup> -H <sub>2</sub> O | y <sup>++11</sup> | y <sub>5</sub> | b <sub>6</sub> | y <sup>++13</sup> -H <sub>2</sub> O | y <sup>++13</sup> | y <sub>6</sub> | b <sup>++14</sup> |        |        |        | b <sub>8</sub> | b <sup>++15</sup> | y <sub>7</sub> | b <sub>9</sub> |      |
| Delta Da                | 0.03                            | 0.12           | 0.04             | 0.24             | 0.09              |        | 0.71           | 0.06           | 0.46                                | 0.27              |                                     | 0.17              | -0.01          | 0.07           | 0.04                                | 0.10              | -0.02          | 0.07              | 0.03   |        |        |                | 0.10              | 0.35           | -0.05          | 0.07 |
|                         | y <sub>4</sub> -NH <sub>3</sub> |                |                  |                  |                   |        |                |                |                                     |                   |                                     |                   |                |                |                                     |                   |                |                   |        |        |        |                |                   |                |                |      |

Reset

# Peak 181

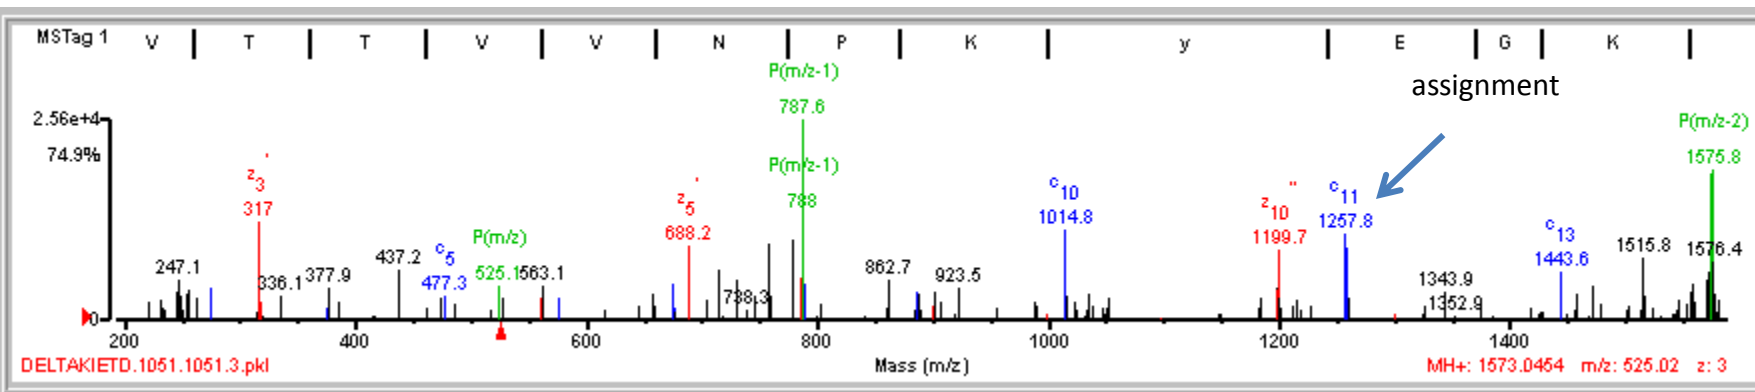

| Rank | Score | SPI (%) | BCS | # Unmatched Ions | Variable sites | Sequence                            | MH <sup>+</sup> Calculated (Da) | MH <sup>+</sup> Error (Da) | MH <sup>+</sup> Error (ppm) | Protein MW/pI (Da) | Species      | Accession #              | MS-Digest Index #     | Protein Name                         |
|------|-------|---------|-----|------------------|----------------|-------------------------------------|---------------------------------|----------------------------|-----------------------------|--------------------|--------------|--------------------------|-----------------------|--------------------------------------|
| 1    | 8.86  | 93.1    | 6   | 1/11             | Y795y          | (K) S A V T/T V/V\N P K Y E G\K (-) | 1492.80                         | 80.2449                    | 177.1                       | 88415.9/5.27       | Homo sapiens | <a href="#">19743813</a> | <a href="#">2162</a>  | integrin beta 1 isoform 1A precursor |
| 1    | 8.86  | 93.1    | 6   | 1/11             | Y795y          | (K) S A V T/T V/V\N P K Y E G\K (-) | 1492.80                         | 80.2449                    | 177.1                       | 88415.9/5.27       | Homo sapiens | <a href="#">19743823</a> | <a href="#">35513</a> | integrin beta 1 isoform 1A precursor |

| Fragment-ion (m/z)     | 246.30 | 317.04                      | 560.05                      | 675.52         | 688.22                      | 886.47         | 1014.83         | 1198.10                      | 1199.72                      | 1257.84         | 1443.63         |
|------------------------|--------|-----------------------------|-----------------------------|----------------|-----------------------------|----------------|-----------------|------------------------------|------------------------------|-----------------|-----------------|
| Frac. Inten.(% of TIC) | 6.95   | 11.91                       | 5.93                        | 5.77           | 11.91                       | 7.24           | 8.94            | 6.21                         | 10.37                        | 17.87           | 6.89            |
| Rel. Inten.(% of BP)   | 38.88  | 66.66                       | 33.16                       | 32.31          | 66.63                       | 40.51          | 50.02           | 34.76                        | 58.03                        | 100.00          | 38.52           |
| Score                  | -0.39  | 1.00                        | 1.00                        | 1.00           | 1.00                        | 1.00           | 1.00            | 1.00                         | 0.25                         | 1.00            | 1.00            |
| Ion-type               |        | z <sub>3</sub> <sup>+</sup> | z <sub>4</sub> <sup>+</sup> | c <sub>7</sub> | z <sub>5</sub> <sup>+</sup> | c <sub>9</sub> | c <sub>10</sub> | z <sub>10</sub> <sup>+</sup> | z <sub>10</sub> <sup>+</sup> | c <sub>11</sub> | c <sub>13</sub> |
| Delta Da               |        | -0.12                       | -0.14                       | 0.12           | -0.06                       | -0.03          | 0.24            | -0.46                        | 0.15                         | 0.22            | -0.06           |
|                        |        |                             |                             |                |                             |                | y <sub>8</sub>  |                              |                              |                 |                 |
|                        |        |                             |                             |                |                             |                | 0.36            |                              |                              |                 |                 |

# Peak 182

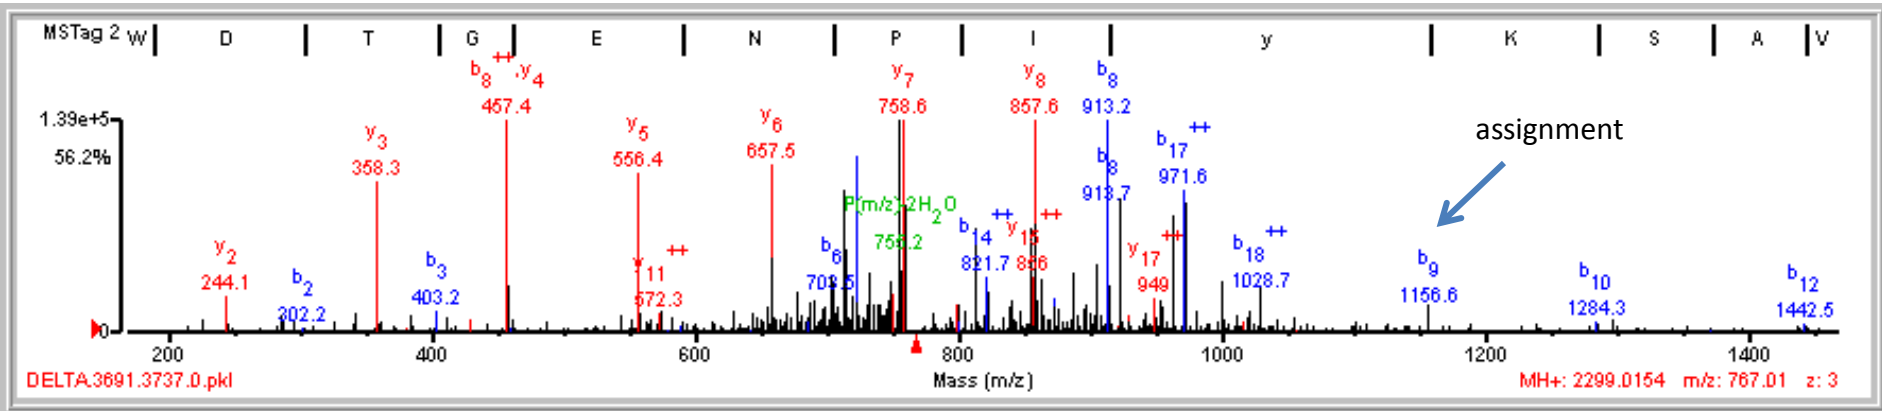

| Rank                    | Score          | SPI (%)                      | BCS            | # Unmatched Ions | Variable sites | Sequence                                                | MH <sup>+</sup> Calculated (Da) | MH <sup>+</sup> Error (Da)    | MH <sup>+</sup> Error (ppm)      | Protein MW/pl (Da) | Species        | Accession #                                     | MS-Digest Index #             | Protein Name                         |                |                                                 |                               |        |                                                 |                               |                                                 |                               |                               |
|-------------------------|----------------|------------------------------|----------------|------------------|----------------|---------------------------------------------------------|---------------------------------|-------------------------------|----------------------------------|--------------------|----------------|-------------------------------------------------|-------------------------------|--------------------------------------|----------------|-------------------------------------------------|-------------------------------|--------|-------------------------------------------------|-------------------------------|-------------------------------------------------|-------------------------------|-------------------------------|
| 1                       | 15.42          | 88.4                         | 9              | 4/23             | Y783y          | (K) W D T G E N P I Y K S A   V / T   V   V   N P K (Y) | 2219.13                         | 79.8812                       | -37.0                            | 88415.9/5.27       | Homo sapiens   | <a href="#">19743813</a>                        | <a href="#">2162</a>          | integrin beta 1 isoform 1A precursor |                |                                                 |                               |        |                                                 |                               |                                                 |                               |                               |
| Fragment-ion (m/z)      | 358.30         | 457.38                       | 556.43         | 657.54           | 703.89         | 712.90                                                  | 715.25                          | 722.09                        | 740.24                           | 749.07             | 758.60         | 813.02                                          | 821.71                        | 854.45                               | 857.65         | 863.82                                          | 872.47                        | 904.69 | 913.15                                          | 922.47                        | 962.77                                          | 971.59                        | 1028.66                       |
| Frac. Inten. (% of TIC) | 3.52           | 5.94                         | 3.81           | 5.73             | 2.84           | 6.33                                                    | 2.90                            | 5.00                          | 2.10                             | 3.10               | 10.77          | 3.88                                            | 2.45                          | 2.87                                 | 8.38           | 1.82                                            | 1.80                          | 2.72   | 9.22                                            | 3.47                          | 2.99                                            | 6.59                          | 1.76                          |
| Rel. Inten. (% of BP)   | 32.65          | 55.14                        | 35.39          | 53.17            | 26.34          | 58.81                                                   | 26.95                           | 46.40                         | 19.53                            | 28.81              | 100.00         | 36.02                                           | 22.78                         | 26.63                                | 77.75          | 16.85                                           | 16.74                         | 25.25  | 85.60                                           | 32.25                         | 27.74                                           | 61.20                         | 16.30                         |
| Score                   | 1.00           | 1.00                         | 1.00           | 1.00             | 1.00           | 0.50                                                    | 0.50                            | 1.00                          | 0.50                             | -0.29              | 1.00           | 0.50                                            | 1.00                          | -0.27                                | 1.00           | 0.50                                            | 1.00                          | -0.25  | 1.00                                            | 1.00                          | 0.50                                            | 1.00                          | 1.00                          |
| Ion-type                | y <sub>3</sub> | b <sup>++</sup> <sub>8</sub> | y <sub>5</sub> | y <sub>6</sub>   | b <sub>8</sub> | b <sup>++</sup> <sub>12</sub> -H <sub>2</sub> O         |                                 | b <sup>++</sup> <sub>12</sub> | y <sub>7</sub> -H <sub>2</sub> O |                    | y <sub>7</sub> | b <sup>++</sup> <sub>14</sub> -H <sub>2</sub> O | b <sup>++</sup> <sub>14</sub> |                                      | y <sub>8</sub> | b <sup>++</sup> <sub>15</sub> -H <sub>2</sub> O | b <sup>++</sup> <sub>15</sub> |        | b <sub>8</sub>                                  | b <sup>++</sup> <sub>16</sub> | b <sup>++</sup> <sub>17</sub> -H <sub>2</sub> O | b <sup>++</sup> <sub>17</sub> | b <sup>++</sup> <sub>18</sub> |
| Delta Da                | 0.09           | 0.17                         | 0.08           | 0.15             | 0.62           | 0.10                                                    |                                 | 0.29                          | -0.19                            |                    | 0.16           | 0.16                                            | -0.15                         |                                      | 0.14           | 0.44                                            | 0.09                          |        | -0.26                                           | 0.55                          | 0.32                                            | 0.14                          | 0.19                          |
|                         |                | y <sub>4</sub>               |                |                  |                |                                                         |                                 |                               |                                  |                    |                |                                                 |                               |                                      |                |                                                 |                               |        | b <sup>++</sup> <sub>16</sub> -H <sub>2</sub> O |                               |                                                 |                               |                               |
|                         |                | 0.10                         |                |                  |                |                                                         |                                 |                               |                                  |                    |                |                                                 |                               |                                      |                |                                                 |                               |        | 0.24                                            |                               |                                                 |                               |                               |

# Peak 183

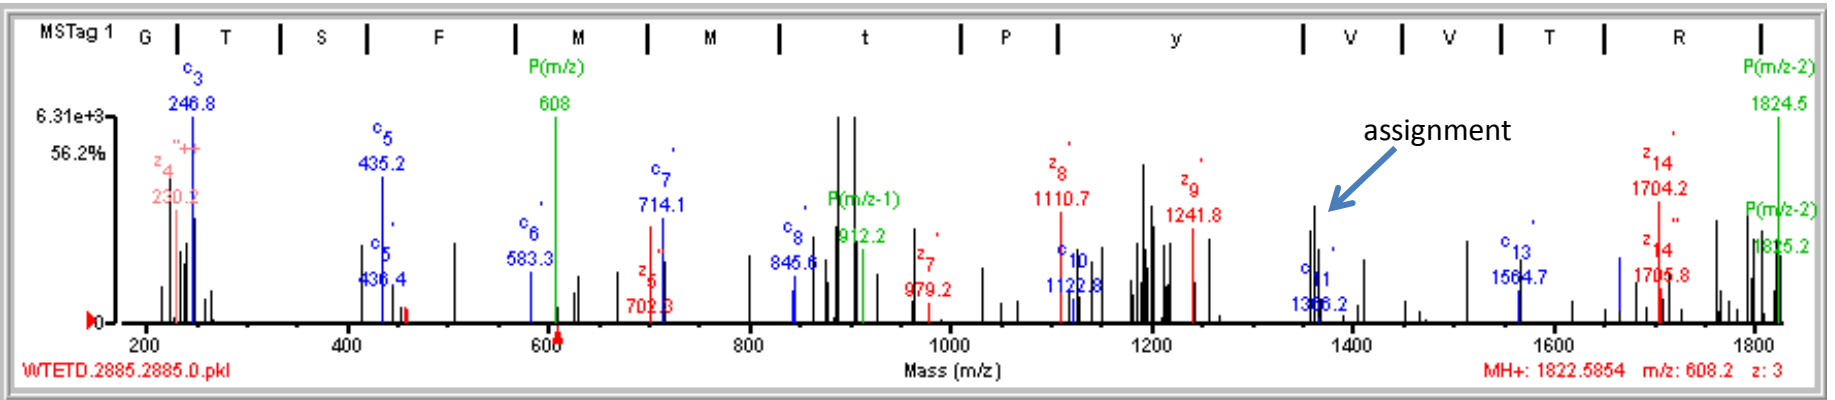

| Rank | Score | SPI (%) | BCS | # Unmatched Ions | Variable sites | Sequence                              | MH <sup>+</sup> Calculated (Da) | MH <sup>+</sup> Error (Da) | MH <sup>+</sup> Error (ppm) | Protein MW/pl (Da) | Species      | Accession #              | MS-Digest Index #     | Protein Name                                           |
|------|-------|---------|-----|------------------|----------------|---------------------------------------|---------------------------------|----------------------------|-----------------------------|--------------------|--------------|--------------------------|-----------------------|--------------------------------------------------------|
| 1    | 7.04  | 52.2    | 7   | 11/23            | T183t Y185y    | (R) T/A G\T S\F M M t P/y V V T R (Y) | 1661.80                         | 160.7829                   | 466.5                       | 48128.6/6.39       | Homo sapiens | <a href="#">20986506</a> | <a href="#">5927</a>  | mitogen-activated protein kinase 10 isoform 3          |
| 1    | 7.04  | 52.2    | 7   | 11/23            | T76t Y78y      | (R) T/A G\T S\F M M t P/y V V T R (Y) | 1661.80                         | 160.7829                   | 466.5                       | 31933.2/6.09       | Homo sapiens | <a href="#">20986508</a> | <a href="#">6525</a>  | mitogen-activated protein kinase 10 isoform 4          |
| 1    | 7.04  | 52.2    | 7   | 11/23            | T221t Y223y    | (R) T/A G\T S\F M M t P/y V V T R (Y) | 1661.80                         | 160.7829                   | 466.5                       | 52585.8/6.33       | Homo sapiens | <a href="#">20986510</a> | <a href="#">13809</a> | mitogen-activated protein kinase 10 isoform 2          |
| 1    | 7.04  | 52.2    | 7   | 11/23            | T183t Y185y    | (R) T/A G\T S\F M M t P/y V V T R (Y) | 1661.80                         | 160.7829                   | 466.5                       | 44229.5/7.58       | Homo sapiens | <a href="#">4506095</a>  | <a href="#">18698</a> | mitogen-activated protein kinase 8 isoform JNK1 alpha1 |
| 1    | 7.04  | 52.2    | 7   | 11/23            | T221t Y223y    | (R) T/A G\T S\F M M t P/y V V T R (Y) | 1661.80                         | 160.7829                   | 466.5                       | 48554.5/7.57       | Homo sapiens | <a href="#">4506081</a>  | <a href="#">25312</a> | mitogen-activated protein kinase 10 isoform 1          |
| 1    | 7.04  | 52.2    | 7   | 11/23            | T183t Y185y    | (R) T/A G\T S\F M M t P/y V V T R (Y) | 1661.80                         | 160.7829                   | 466.5                       | 44022.2/7.13       | Homo sapiens | <a href="#">20986519</a> | <a href="#">31328</a> | mitogen-activated protein kinase 8 isoform JNK1 beta1  |
| 1    | 7.04  | 52.2    | 7   | 11/23            | T183t Y185y    | (R) T/A G\T S\F M M t P/y V V T R (Y) | 1661.80                         | 160.7829                   | 466.5                       | 48088.6/6.29       | Homo sapiens | <a href="#">20986521</a> | <a href="#">33237</a> | mitogen-activated protein kinase 8 isoform JNK1 beta2  |
| 1    | 7.04  | 52.2    | 7   | 11/23            | T183t Y185y    | (R) T/A G\T S\F M M t P/y V V T R (Y) | 1661.80                         | 160.7829                   | 466.5                       | 48295.9/6.43       | Homo sapiens | <a href="#">20986523</a> | <a href="#">35562</a> | mitogen-activated protein kinase 8 isoform JNK1 alpha2 |

| Fragment-ion (m/z)     | 223.51 | 230.15           | 246.79         | 435.17         | 582.25         | 701.04         | 714.12         | 863.45 | 886.07 | 887.96 | 963.70         | 1110.67        | 1126.51 | 1192.10 | 1201.35 | 1213.63 | 1218.45 | 1241.78        | 1257.71        | 1358.84 | 1362.84 | 1365.92         | 1704.24         |
|------------------------|--------|------------------|----------------|----------------|----------------|----------------|----------------|--------|--------|--------|----------------|----------------|---------|---------|---------|---------|---------|----------------|----------------|---------|---------|-----------------|-----------------|
| Frac. Inten.(% of TIC) | 4.67   | 3.64             | 13.84          | 5.71           | 3.14           | 3.34           | 3.40           | 2.78   | 4.89   | 7.03   | 3.04           | 3.56           | 3.24    | 5.10    | 6.85    | 3.73    | 3.00    | 3.03           | 2.72           | 2.96    | 3.78    | 2.66            | 3.92            |
| Rel. Inten.(% of BP)   | 33.72  | 26.29            | 100.00         | 41.29          | 22.71          | 24.15          | 24.56          | 20.06  | 35.31  | 50.79  | 21.95          | 25.73          | 23.39   | 36.86   | 49.53   | 26.93   | 21.68   | 21.87          | 19.66          | 21.42   | 27.34   | 19.19           | 28.29           |
| Score                  | -0.34  | 1.00             | 1.00           | 1.00           | 1.00           | 1.00           | 1.00           | -0.20  | -0.35  | -0.51  | -0.22          | 1.00           | 0.25    | -0.37   | -0.50   | -0.27   | -0.22   | 1.00           | 0.25           | -0.21   | -0.27   | 1.00            | 1.00            |
| Ion-type               |        | z <sup>++4</sup> | c <sub>3</sub> | c <sub>5</sub> | c <sub>6</sub> | z <sub>5</sub> | c <sub>7</sub> |        |        |        | z <sub>8</sub> | y <sub>8</sub> |         |         |         |         |         | z <sub>9</sub> | y <sub>9</sub> |         |         | c <sub>11</sub> | z <sub>14</sub> |
| Delta Da               |        | 0.50             | -0.35          | -0.05          | -0.04          | -0.27          | 0.79           |        |        |        | 0.25           | 0.07           |         |         |         |         |         | 0.32           | 0.23           |         |         | 0.45            | -0.43           |

# Peak 185

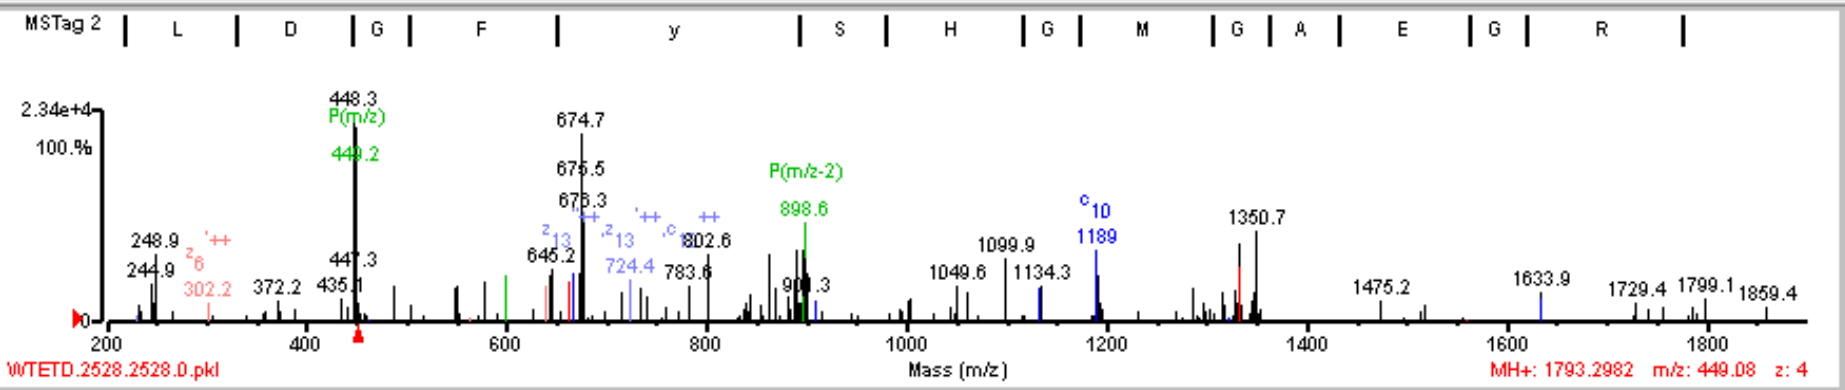

| Rank                    | Score            | SPI (%) | BCS              | # Unmatched Ions  | Variable sites    | Sequence                                | MH <sup>+</sup> Calculated (Da) | MH <sup>+</sup> Error (Da) | MH <sup>+</sup> Error (ppm) | Protein MW/pl (Da) | Species           | Accession #              | MS-Digest Index #    | Protein Name                         |         |         |                 |                 |         |         |                 |         |         |         |                 |
|-------------------------|------------------|---------|------------------|-------------------|-------------------|-----------------------------------------|---------------------------------|----------------------------|-----------------------------|--------------------|-------------------|--------------------------|----------------------|--------------------------------------|---------|---------|-----------------|-----------------|---------|---------|-----------------|---------|---------|---------|-----------------|
| 1                       | 7.89             | 57.5    | 10               | 13/25             | Y1512y            | (R) Q/S L/D/G/F/Y S H/G M/G A/E G\R (E) | 1711.75                         | 81.5489                    | 882.5                       | 307552.0/5.12      | Homo sapiens      | <a href="#">21493029</a> | <a href="#">4313</a> | A-kinase anchor protein 13 isoform 2 |         |         |                 |                 |         |         |                 |         |         |         |                 |
| Fragment-ion (m/z)      | 244.92           | 248.90  | 302.24           | 550.10            | 638.62            | 644.55                                  | 661.85                          | 665.88                     | 672.32                      | 674.74             | 724.45            | 802.63                   | 862.78               | 1002.64                              | 1049.58 | 1099.92 | 1189.05         | 1190.98         | 1297.78 | 1327.71 | 1332.96         | 1346.17 | 1349.56 | 1350.70 | 1633.91         |
| Frac. Inten. (% of TIC) | 2.52             | 4.45    | 1.90             | 2.20              | 1.89              | 5.02                                    | 2.09                            | 2.51                       | 2.52                        | 22.84              | 2.15              | 3.48                     | 5.22                 | 2.35                                 | 1.91    | 3.19    | 3.66            | 5.16            | 2.25    | 1.96    | 7.81            | 2.72    | 1.96    | 5.43    | 2.81            |
| Rel. Inten. (% of BP)   | 11.04            | 19.47   | 8.34             | 9.65              | 8.27              | 22.00                                   | 9.17                            | 11.01                      | 11.05                       | 100.00             | 9.42              | 15.24                    | 22.85                | 10.27                                | 8.36    | 13.96   | 16.03           | 22.60           | 9.84    | 8.58    | 34.18           | 11.92   | 8.57    | 23.78   | 12.28           |
| Score                   | 0.25             | -0.19   | 1.00             | 1.00              | 1.00              | -0.22                                   | 1.00                            | 1.00                       | -0.11                       | 0.25               | 1.00              | -0.15                    | -0.23                | -0.10                                | -0.08   | -0.14   | 1.00            | 0.25            | -0.10   | -0.09   | 1.00            | -0.12   | -0.09   | -0.24   | 1.00            |
| Ion-type                | y <sup>++5</sup> |         | z <sup>++6</sup> | z <sup>3+15</sup> | z <sup>++11</sup> |                                         | c <sup>++11</sup>               | c <sub>8</sub>             |                             | y <sup>++12</sup>  | c <sup>++13</sup> |                          |                      |                                      |         |         | c <sub>10</sub> | c <sub>10</sub> |         |         | z <sub>12</sub> |         |         |         | c <sub>15</sub> |
| Delta Da                | -0.20            |         | -0.40            | 0.22              | 0.38              |                                         | 0.59                            | 0.55                       |                             | -0.02              | -0.34             |                          |                      |                                      |         |         | -0.42           | 0.50            |         |         | 0.46            |         |         |         | -0.72           |









# Peak 189

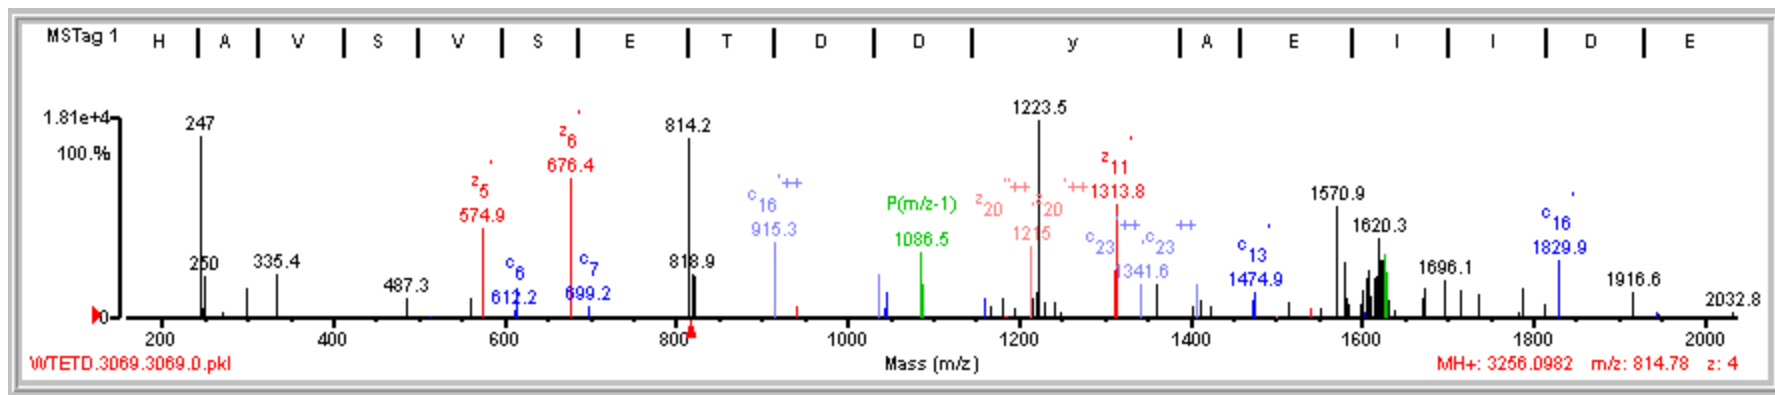

1 7.51 67.2 10 8/21 Y397y (R) T/H A/V S/V S E/T D D y A/E/I I/D/E/E D T Y/T/M P S T R (D) 3175.39 80.7086 228.0 119233.7/6.19 Homo sapiens [24476013](#) [12819](#) PTK2 protein tyrosine kinase 2 isoform a

| Fragment-ion (m/z)      | 246.98 | 250.01 | 335.40 | 574.92         | 676.38         | 818.90 | 821.39 | 915.34             | 1036.74           | 1215.05           | 1223.49           | 1313.13          | 1313.85          | 1341.64           | 1473.82         | 1570.91             | 1581.46 | 1606.91 | 1671.05         | 1696.13 | 1829.86 |
|-------------------------|--------|--------|--------|----------------|----------------|--------|--------|--------------------|-------------------|-------------------|-------------------|------------------|------------------|-------------------|-----------------|---------------------|---------|---------|-----------------|---------|---------|
| Frac. Inten. (% of TIC) | 11.20  | 2.63   | 2.80   | 5.57           | 8.67           | 2.78   | 5.09   | 4.72               | 2.78              | 4.48              | 13.18             | 3.03             | 7.05             | 2.17              | 2.84            | 6.94                | 3.47    | 2.46    | 2.22            | 2.35    | 3.56    |
| Rel. Inten. (% of BP)   | 84.99  | 19.99  | 21.26  | 42.31          | 65.80          | 21.11  | 38.67  | 35.84              | 21.07             | 33.98             | 100.00            | 22.98            | 53.48            | 16.50             | 21.55           | 52.67               | 26.32   | 18.64   | 16.87           | 17.84   | 27.05   |
| Score                   | -0.85  | -0.20  | -0.21  | 1.00           | 1.00           | -0.21  | -0.39  | 1.00               | 1.00              | 1.00              | 0.25              | 1.00             | 1.00             | 1.00              | 1.00            | 0.25                | -0.26   | -0.19   | 0.25            | -0.18   | 0.25    |
| Ion-type                |        |        |        | z <sub>5</sub> | z <sub>6</sub> |        |        | c <sub>++16</sub>  | c <sub>++18</sub> | z <sub>++20</sub> | y <sub>++20</sub> | z <sub>'11</sub> | z <sub>'11</sub> | c <sub>++23</sub> | c <sub>13</sub> | z <sub>''++27</sub> |         |         | y <sub>14</sub> |         |         |
| Delta Da                |        |        |        | -0.35          | 0.06           |        |        | 0.44               | -0.20             | 0.07              | 0.50              | -0.41            | 0.31             | 0.09              | 0.23            | 0.76                |         |         | 0.29            |         | 0.05    |
|                         |        |        |        |                |                |        |        | z <sub>3'+23</sub> |                   |                   |                   |                  |                  | y <sub>++25</sub> |                 |                     |         |         |                 |         |         |
|                         |        |        |        |                |                |        |        | -0.03              |                   |                   |                   |                  |                  | 0.21              |                 |                     |         |         |                 |         |         |

# Peak 190

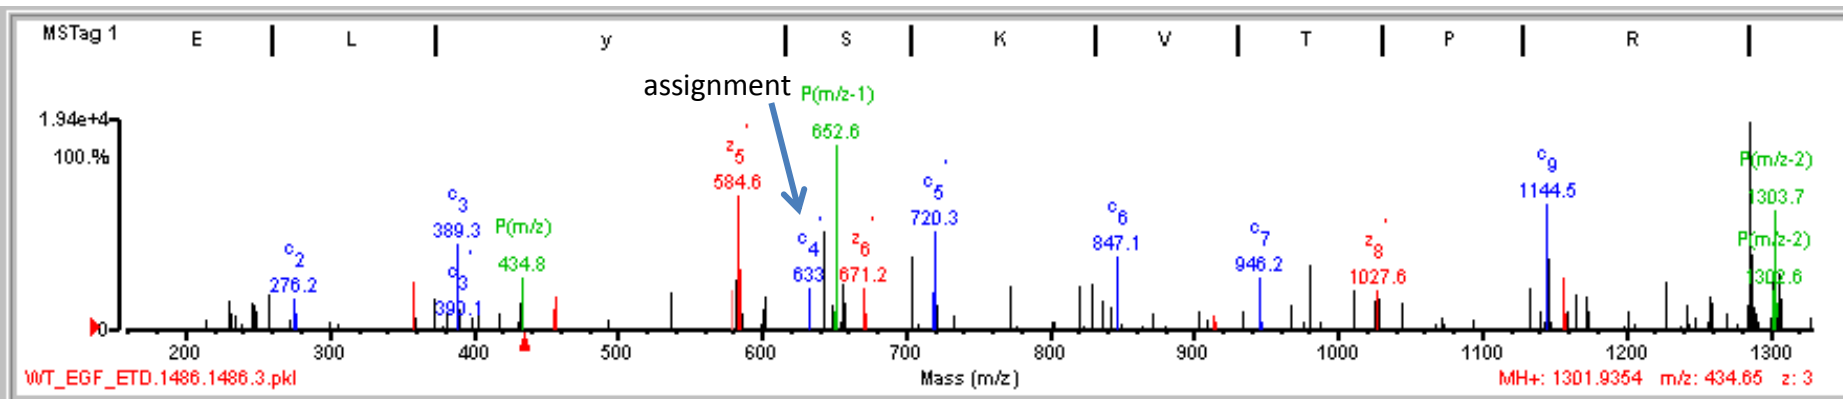

| Rank | Score | SPI (%) | BCS | # Unmatched Ions | Variable sites | Sequence                   | MH* Calculated (Da) | MH* Error (Da) | MH* Error (ppm) | Protein MW/pi (Da) | Species      | Accession #              | MS-Digest Index #     | Protein Name                                      |
|------|-------|---------|-----|------------------|----------------|----------------------------|---------------------|----------------|-----------------|--------------------|--------------|--------------------------|-----------------------|---------------------------------------------------|
| 1    | 8.27  | 75.5    | 8   | 6/18             | Y19y           | (R) E/E\ Y/S K V T P\R (R) | 1221.65             | 80.2881        | 247.1           | 72696.4/6.48       | Homo sapiens | <a href="#">24497612</a> | <a href="#">13864</a> | ubiquitin associated and SH3 domain containing, B |

| Fragment-ion (m/z)      | 230.36                        | 248.15 | 276.15         | 358.07                       | 389.28         | 456.22                      | 583.07 | 584.56                      | 671.21                      | 705.24 | 720.33                      | 847.12         | 946.15         | 980.93 | 1026.32 | 1144.54        | 1156.77                     | 1227.34 |
|-------------------------|-------------------------------|--------|----------------|------------------------------|----------------|-----------------------------|--------|-----------------------------|-----------------------------|--------|-----------------------------|----------------|----------------|--------|---------|----------------|-----------------------------|---------|
| Frac. Inten. (% of TIC) | 3.18                          | 4.26   | 3.14           | 4.01                         | 6.13           | 3.59                        | 3.30   | 13.62                       | 4.00                        | 4.68   | 8.03                        | 4.65           | 4.00           | 4.16   | 4.97    | 16.58          | 4.53                        | 3.17    |
| Rel. Inten. (% of BP)   | 19.15                         | 25.67  | 18.92          | 24.20                        | 36.99          | 21.66                       | 19.92  | 82.12                       | 24.14                       | 28.19  | 48.43                       | 28.04          | 24.14          | 25.06  | 29.97   | 100.00         | 27.29                       | 19.09   |
| Score                   | 0.25                          | -0.26  | 1.00           | 0.25                         | 1.00           | 1.00                        | -0.20  | 1.00                        | 1.00                        | -0.28  | 0.25                        | 1.00           | 1.00           | -0.25  | -0.30   | 1.00           | 1.00                        | -0.19   |
| Ion-type                | y <sup>+++</sup> <sub>e</sub> |        | c <sub>2</sub> | z <sup>++</sup> <sub>3</sub> | c <sub>3</sub> | z <sup>+</sup> <sub>4</sub> |        | z <sup>+</sup> <sub>5</sub> | z <sup>+</sup> <sub>6</sub> |        | c <sup>+</sup> <sub>5</sub> | c <sub>6</sub> | c <sub>7</sub> |        |         | c <sub>9</sub> | z <sup>+</sup> <sub>9</sub> |         |
| Delta Da                | 0.55                          |        | 0.03           | -0.14                        | 0.08           | -0.05                       |        | 0.20                        | -0.19                       |        | 0.06                        | -0.24          | -0.28          |        |         | 0.01           | 0.22                        |         |

# Peak 191

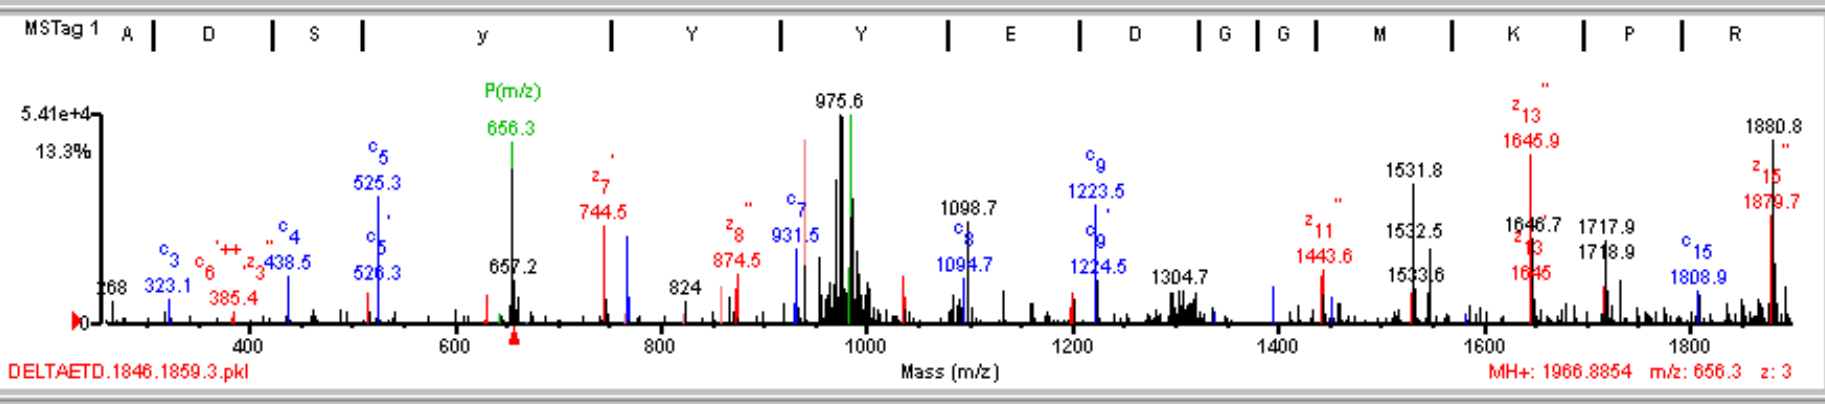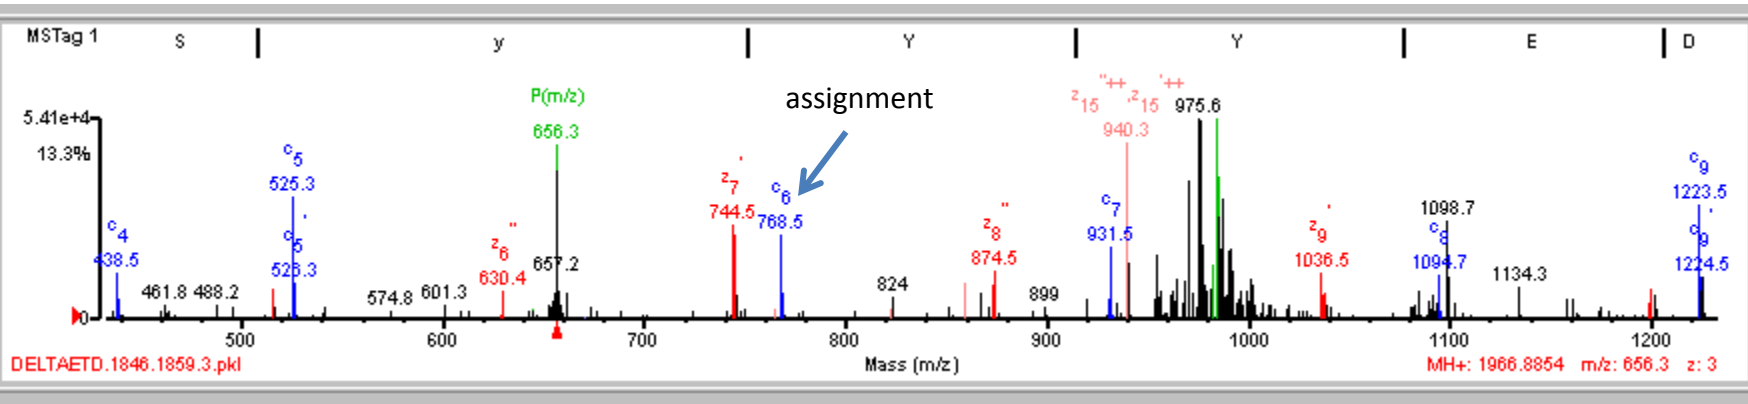

| Rank                   | Score          | SPI (%)        | BCS            | # Unmatched Ions | Variable sites | Sequence                                  | MH <sup>+</sup> Calculated (Da) | MH <sup>+</sup> Error (Da)    | MH <sup>+</sup> Error (ppm) | Protein MW/pl (Da) | Species      | Accession #              | MS-Digest Index #     | Protein Name               |                               |                 |                               |         |         |                               |         |                 |                               |         |
|------------------------|----------------|----------------|----------------|------------------|----------------|-------------------------------------------|---------------------------------|-------------------------------|-----------------------------|--------------------|--------------|--------------------------|-----------------------|----------------------------|-------------------------------|-----------------|-------------------------------|---------|---------|-------------------------------|---------|-----------------|-------------------------------|---------|
| 1                      | 8.69           | 61.6           | 10             | 8/24             | Y144y          | (R) A/Y A/D I S Y Y Y/B D G/G/M/K P/R (V) | 1885.81                         | 81.0793                       | 565.9                       | 35822.2/6.19       | Homo sapiens | <a href="#">28372509</a> | <a href="#">29582</a> | Ymer protein short isoform |                               |                 |                               |         |         |                               |         |                 |                               |         |
| Fragment-ion (m/z)     | 438.51         | 515.32         | 525.31         | 744.51           | 768.52         | 873.56                                    | 931.49                          | 940.28                        | 991.46                      | 1036.53            | 1098.69      | 1223.52                  | 1297.65               | 1308.70                    | 1443.63                       | 1458.64         | 1530.98                       | 1531.76 | 1547.02 | 1645.92                       | 1717.93 | 1808.89         | 1879.70                       | 1880.80 |
| Frac. Inten.(% of TIC) | 1.93           | 1.87           | 4.05           | 5.22             | 2.94           | 2.16                                      | 2.10                            | 6.59                          | 3.53                        | 2.90               | 4.46         | 6.48                     | 2.05                  | 2.01                       | 2.94                          | 1.94            | 2.95                          | 7.50    | 2.30    | 10.78                         | 6.81    | 3.02            | 3.69                          | 9.76    |
| Rel. Inten.(% of BP)   | 17.93          | 17.32          | 37.52          | 48.46            | 27.24          | 20.00                                     | 19.51                           | 61.17                         | 32.79                       | 26.92              | 41.33        | 60.09                    | 19.04                 | 18.65                      | 27.28                         | 18.03           | 27.33                         | 69.60   | 21.36   | 100.00                        | 63.20   | 28.03           | 34.25                         | 90.53   |
| Score                  | 1.00           | 1.00           | 1.00           | 1.00             | 1.00           | 1.00                                      | 1.00                            | 1.00                          | -0.33                       | 1.00               | -0.41        | 1.00                     | 1.00                  | -0.19                      | -0.19                         | 0.25            | 0.25                          | -0.70   | -0.21   | 0.25                          | -0.63   | 1.00            | 0.25                          | -0.91   |
| Ion-type               | c <sub>4</sub> | z <sub>4</sub> | c <sub>5</sub> | z <sub>7</sub>   | c <sub>6</sub> | z <sub>8</sub>                            | c <sub>7</sub>                  | z <sup>++</sup> <sub>15</sub> |                             | z <sub>9</sub>     |              | c <sub>9</sub>           |                       |                            | z <sup>++</sup> <sub>11</sub> | y <sub>11</sub> | z <sup>++</sup> <sub>12</sub> |         |         | z <sup>++</sup> <sub>13</sub> |         | c <sub>15</sub> | z <sup>++</sup> <sub>15</sub> |         |
| Delta Da               | 0.31           | 0.03           | 0.08           | 0.15             | 0.26           | 0.16                                      | 0.17                            | 0.42                          |                             | 0.07               |              | 0.09                     |                       |                            | 0.06                          | 0.06            | 0.38                          |         |         | 0.30                          |         | 0.20            | -0.02                         |         |



# Peak 193

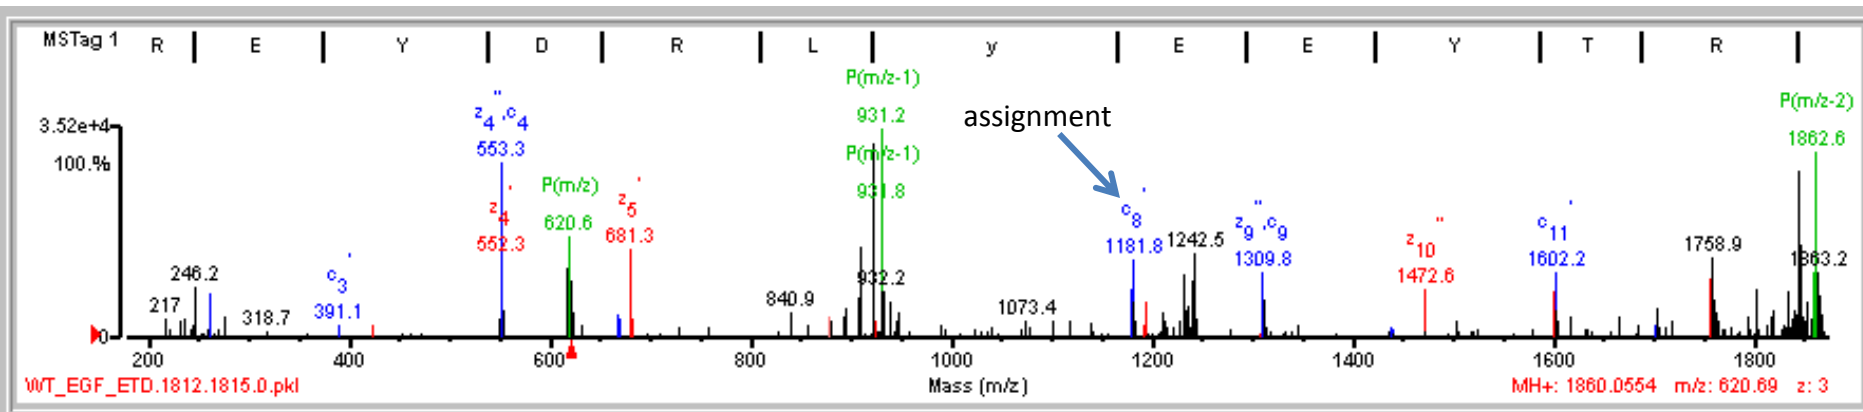

| Rank                    | Score  | SPI (%)        | BCS             | # Unmatched Ions | Variable sites | Sequence                          | MH <sup>+</sup> Calculated (Da) | MH <sup>+</sup> Error (Da) | MH <sup>+</sup> Error (ppm) | Protein MW/pI (Da) | Species      | Accession #              | MS-Digest Index #   | Protein Name                                                      |         |                  |                 |                   |                 |         |                 |                   |         |         |
|-------------------------|--------|----------------|-----------------|------------------|----------------|-----------------------------------|---------------------------------|----------------------------|-----------------------------|--------------------|--------------|--------------------------|---------------------|-------------------------------------------------------------------|---------|------------------|-----------------|-------------------|-----------------|---------|-----------------|-------------------|---------|---------|
| 1                       | 8.32   | 64.3           | 9               | 9/24             | Y467y          | (K) S/R E/Y D R L Y E E Y T\R (T) | 1779.83                         | 80.2258                    | 139.5                       | 83598.8/5.84       | Homo sapiens | <a href="#">32455248</a> | <a href="#">339</a> | phosphoinositide-3-kinase, regulatory subunit 1 (alpha) isoform 1 |         |                  |                 |                   |                 |         |                 |                   |         |         |
| 1                       | 8.32   | 64.3           | 9               | 9/24             | Y167y          | (K) S/R E/Y D R L Y E E Y T\R (T) | 1779.83                         | 80.2258                    | 139.5                       | 49965.3/7.20       | Homo sapiens | <a href="#">32455250</a> | <a href="#">643</a> | phosphoinositide-3-kinase, regulatory subunit 1 (alpha) isoform 3 |         |                  |                 |                   |                 |         |                 |                   |         |         |
| 1                       | 8.32   | 64.3           | 9               | 9/24             | Y197y          | (K) S/R E/Y D R L Y E E Y T\R (T) | 1779.83                         | 80.2258                    | 139.5                       | 53486.3/5.98       | Homo sapiens | <a href="#">32455252</a> | <a href="#">917</a> | phosphoinositide-3-kinase, regulatory subunit 1 (alpha) isoform 2 |         |                  |                 |                   |                 |         |                 |                   |         |         |
| Fragment-ion (m/z)      | 246.16 | 260.93         | 552.31          | 553.29           | 668.33         | 681.30                            | 879.13                          | 1180.48                    | 1181.76                     | 1193.52            | 1232.51      | 1234.16                  | 1237.50             | 1240.87                                                           | 1241.41 | 1309.78          | 1311.36         | 1472.63           | 1600.91         | 1603.71 | 1703.15         | 1757.62           | 1758.88 | 1763.65 |
| Frac. Inten. (% of TIC) | 3.43   | 3.27           | 3.77            | 9.71             | 2.07           | 5.13                              | 3.85                            | 2.31                       | 6.31                        | 3.97               | 3.06         | 3.78                     | 2.54                | 2.37                                                              | 7.51    | 4.47             | 4.60            | 2.66              | 5.80            | 2.88    | 3.52            | 2.84              | 7.83    | 2.32    |
| Rel. Inten. (% of BP)   | 35.27  | 33.63          | 38.80           | 100.00           | 21.27          | 52.84                             | 39.62                           | 23.76                      | 65.00                       | 40.90              | 31.49        | 38.93                    | 26.15               | 24.36                                                             | 77.33   | 46.03            | 47.40           | 27.37             | 59.72           | 29.63   | 36.19           | 29.28             | 80.66   | 23.92   |
| Score                   | -0.35  | 1.00           | 1.00            | 1.00             | 1.00           | 1.00                              | 1.00                            | 1.00                       | 0.25                        | 1.00               | -0.31        | -0.39                    | -0.26               | -0.24                                                             | -0.77   | 1.00             | 0.25            | 0.25              | 1.00            | -0.30   | 1.00            | 0.25              | -0.81   | -0.24   |
| Ion-type                |        | c <sub>2</sub> | z' <sub>4</sub> | c <sub>4</sub>   | c <sub>5</sub> | z' <sub>5</sub>                   | z'+ <sub>12</sub>               | c <sub>8</sub>             | c' <sub>8</sub>             | z' <sub>8</sub>    |              |                          |                     |                                                                   |         | c <sub>9</sub>   | c' <sub>9</sub> | z'' <sub>10</sub> | c <sub>11</sub> |         | c <sub>12</sub> | z'' <sub>12</sub> |         |         |
| Delta Da                |        | -0.24          | 0.06            | 0.02             | 0.03           | 0.00                              | 0.25                            | -0.03                      | 0.24                        | 0.01               |              |                          |                     |                                                                   |         | 0.22             | 0.79            | 0.02              | -0.75           |         | 0.44            | -0.13             |         |         |
|                         |        |                | z' <sub>2</sub> | z'' <sub>4</sub> |                |                                   |                                 |                            |                             |                    |              |                          |                     |                                                                   |         | z'' <sub>9</sub> |                 | z'' <sub>11</sub> |                 |         |                 |                   |         |         |
|                         |        |                | 0.78            | 0.03             |                |                                   |                                 |                            |                             |                    |              |                          |                     |                                                                   |         | 0.23             |                 | 0.27              |                 |         |                 |                   |         |         |







# Peak 196

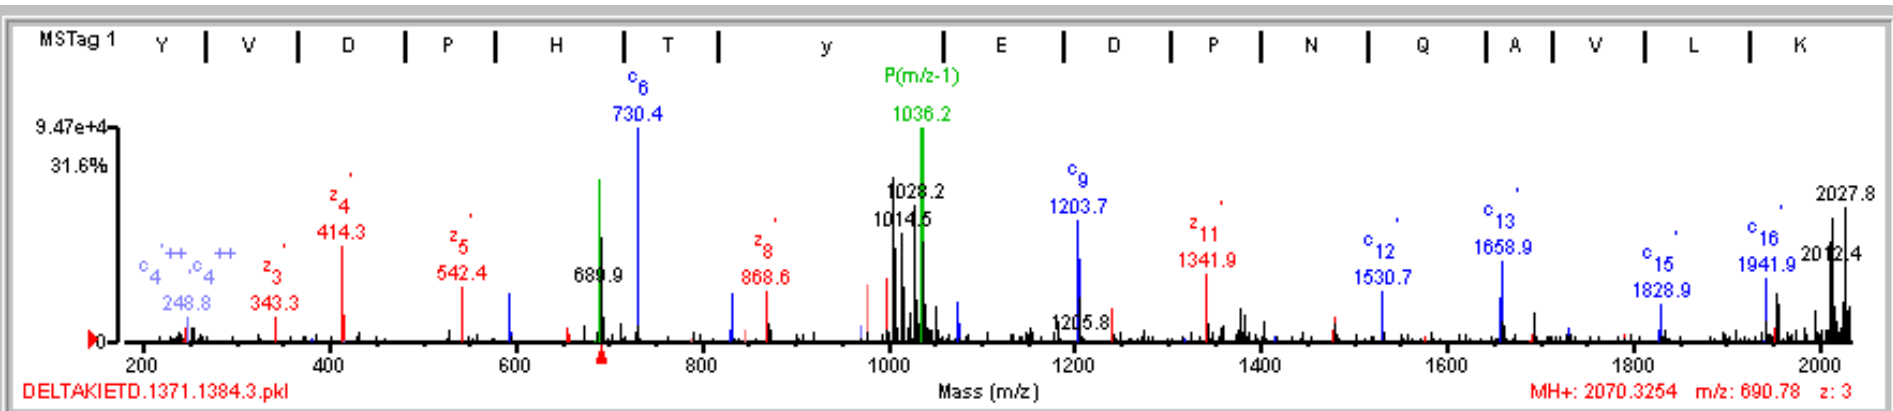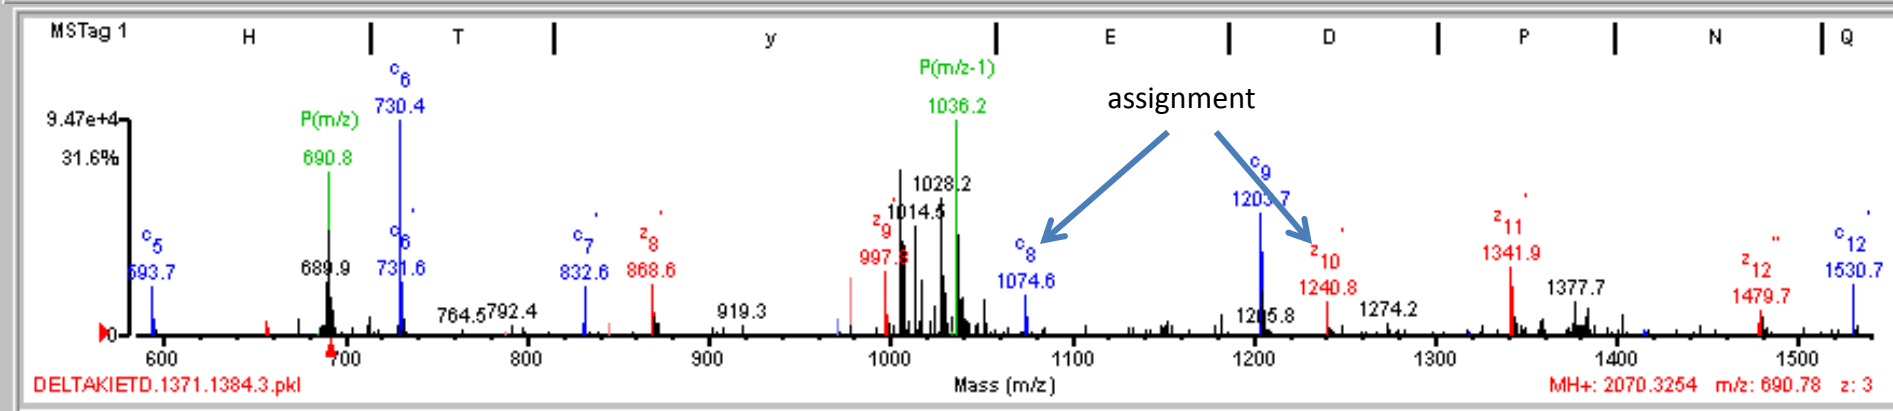

| Rank                    | Score           | SPI (%)         | BCS            | # Unmatched Ions | # Variable sites | Sequence                                        | MH <sup>+</sup> Calculated (Da) | MH <sup>+</sup> Error (Da) | MH <sup>+</sup> Error (ppm) | Protein MW/pi (Da) | Species        | Accession #              | MS-Digest Index #     | Protein Name          |         |         |                  |                  |                 |                  |                  |         |         |
|-------------------------|-----------------|-----------------|----------------|------------------|------------------|-------------------------------------------------|---------------------------------|----------------------------|-----------------------------|--------------------|----------------|--------------------------|-----------------------|-----------------------|---------|---------|------------------|------------------|-----------------|------------------|------------------|---------|---------|
| 1                       | 12.02           | 82.8            | 9              | 6/23             | Y594y            | (K) T/Y V D P H T I y E I D P N Q I A V L K (F) | 1989.96                         | 80.3702                    | 195.1                       | 108267.1/5.86      | Homo sapiens   | <a href="#">32967311</a> | <a href="#">13835</a> | ephrin receptor EphA2 |         |         |                  |                  |                 |                  |                  |         |         |
| Fragment-ion (m/z)      | 414.32          | 542.36          | 593.67         | 730.45           | 832.62           | 868.64                                          | 870.79                          | 977.70                     | 997.85                      | 1051.93            | 1074.63        | 1203.70                  | 1240.77               | 1341.89               | 1377.74 | 1383.84 | 1479.66          | 1530.72          | 1657.88         | 1658.89          | 1941.87          | 1955.08 | 1996.02 |
| Frac. Inten. (% of TIC) | 5.37            | 2.96            | 3.68           | 12.38            | 2.58             | 3.66                                            | 2.17                            | 3.15                       | 4.19                        | 2.16               | 3.78           | 14.00                    | 2.30                  | 8.12                  | 2.27    | 1.98    | 3.27             | 3.18             | 1.93            | 4.80             | 3.41             | 6.49    | 2.16    |
| Rel. Inten. (% of BP)   | 38.34           | 21.16           | 26.29          | 88.43            | 18.44            | 26.16                                           | 15.54                           | 22.53                      | 29.94                       | 15.40              | 27.03          | 100.00                   | 16.43                 | 58.03                 | 16.20   | 14.13   | 23.39            | 22.71            | 13.79           | 34.28            | 24.35            | 46.40   | 15.43   |
| Score                   | 1.00            | 1.00            | 1.00           | 1.00             | 0.25             | 1.00                                            | -0.16                           | 1.00                       | 1.00                        | -0.15              | 1.00           | 1.00                     | 1.00                  | 1.00                  | -0.16   | -0.14   | 0.25             | 0.25             | 1.00            | 0.25             | 0.25             | -0.46   | -0.15   |
| Ion-type                | z' <sub>4</sub> | z' <sub>5</sub> | c <sub>5</sub> | c <sub>6</sub>   | c' <sub>7</sub>  | z' <sub>8</sub>                                 | z' <sub>++16</sub>              | z' <sub>9</sub>            |                             |                    | c <sub>8</sub> | c <sub>9</sub>           | z' <sub>10</sub>      | z' <sub>11</sub>      |         |         | z' <sub>12</sub> | c' <sub>12</sub> | c <sub>13</sub> | c' <sub>13</sub> | c' <sub>16</sub> |         |         |
| Delta Da                | 0.04            | 0.02            | 0.38           | 0.10             | 0.21             | 0.18                                            |                                 | 0.77                       | 0.34                        |                    | 0.20           | 0.23                     | 0.23                  | 0.31                  |         |         | 0.01             | 0.12             | 0.23            | 0.23             | 0.02             |         |         |

# Peak 197

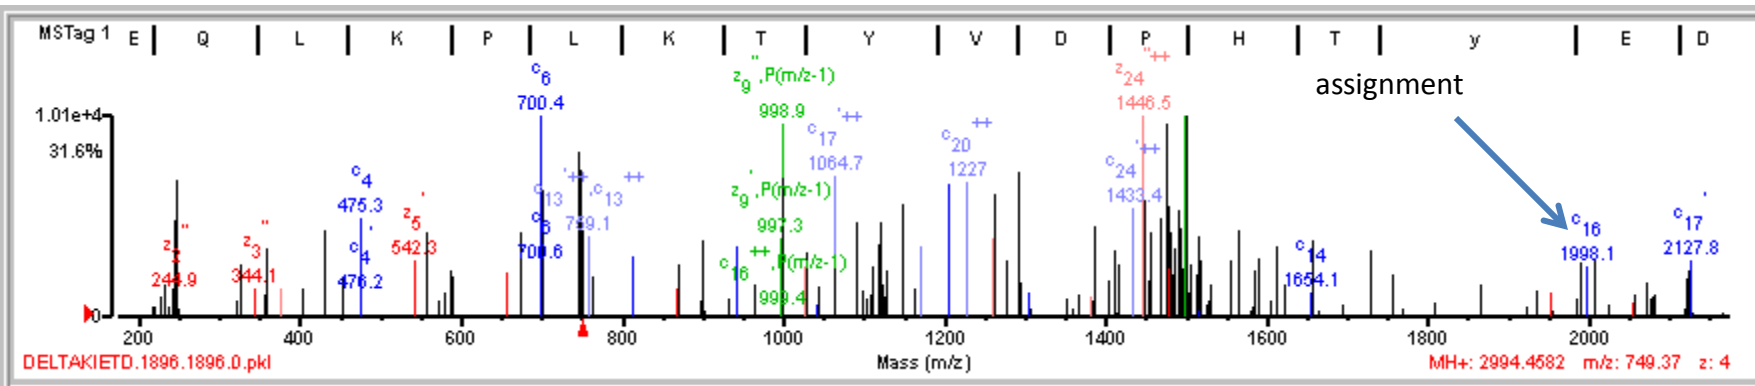

| 1                       | 9.14   | 68.2   | 11             | 8/21           | Y594y                         | (K) S/E        | Q                             | L/K                           | P/L/K                         | T/Y     | V/D     | P/H     | T/Y                           | E/D             | P/N/Q                         | A/V                           | L/K     | (F)     | 2913.50                       | 80.9589                       | 331.5   | 108267.1/5.86 | Homo sapiens | <a href="#">32967311</a> | <a href="#">13835</a> | ephrin receptor EphA2 |  |
|-------------------------|--------|--------|----------------|----------------|-------------------------------|----------------|-------------------------------|-------------------------------|-------------------------------|---------|---------|---------|-------------------------------|-----------------|-------------------------------|-------------------------------|---------|---------|-------------------------------|-------------------------------|---------|---------------|--------------|--------------------------|-----------------------|-----------------------|--|
| Fragment-ion (m/z)      | 246.07 | 248.86 | 475.30         | 700.39         | 759.06                        | 941.74         | 1028.05                       | 1064.74                       | 1092.47                       | 1118.44 | 1120.45 | 1149.39 | 1169.96                       | 1206.82         | 1227.05                       | 1260.84                       | 1292.51 | 1387.51 | 1433.42                       | 1446.48                       | 1448.28 |               |              |                          |                       |                       |  |
| Frac. Inten. (% of TIC) | 5.02   | 4.63   | 4.16           | 13.48          | 3.20                          | 3.59           | 3.87                          | 6.40                          | 3.17                          | 3.15    | 3.20    | 3.80    | 3.06                          | 4.46            | 4.53                          | 6.79                          | 4.87    | 3.08    | 3.71                          | 7.80                          | 4.04    |               |              |                          |                       |                       |  |
| Rel. Inten. (% of BP)   | 37.22  | 34.30  | 30.83          | 100.00         | 23.75                         | 26.65          | 28.73                         | 47.49                         | 23.51                         | 23.34   | 23.70   | 28.17   | 22.69                         | 33.06           | 33.58                         | 50.39                         | 36.15   | 22.87   | 27.49                         | 57.85                         | 29.95   |               |              |                          |                       |                       |  |
| Score                   | -0.37  | -0.34  | 1.00           | 1.00           | 1.00                          | 1.00           | 1.00                          | 1.00                          | 0.25                          | -0.23   | -0.24   | -0.28   | 1.00                          | 0.25            | 1.00                          | 1.00                          | -0.36   | -0.23   | 1.00                          | 1.00                          | -0.30   |               |              |                          |                       |                       |  |
| Ion-type                |        |        | c <sub>4</sub> | c <sub>6</sub> | c <sup>++</sup> <sub>13</sub> | c <sub>8</sub> | z <sup>++</sup> <sub>17</sub> | c <sup>++</sup> <sub>17</sub> | z <sup>++</sup> <sub>18</sub> |         |         |         | c <sup>++</sup> <sub>19</sub> | c <sub>10</sub> | c <sup>++</sup> <sub>20</sub> | z <sup>++</sup> <sub>21</sub> |         |         | c <sup>++</sup> <sub>24</sub> | z <sup>++</sup> <sub>24</sub> |         |               |              |                          |                       |                       |  |
| Delta Da                |        |        | 0.05           | -0.01          | 0.14                          | 0.16           | 0.59                          | 0.73                          | 0.46                          |         |         |         | -0.09                         | 0.12            | -0.02                         | 0.22                          |         |         | 0.72                          | 0.77                          |         |               |              |                          |                       |                       |  |





# Peak 200

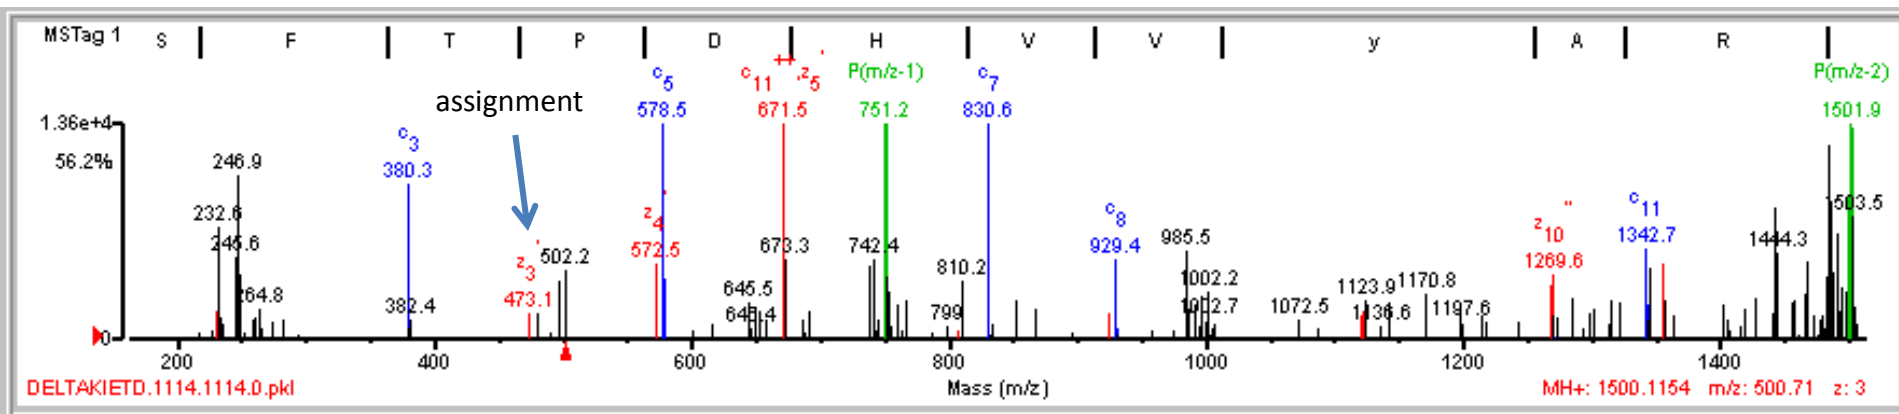

| Rank                    | Score | SPI (%)        | BCS                          | # Unmatched Ions | Variable sites | Sequence                       | MH <sup>+</sup> Calculated (Da) | MH <sup>+</sup> Error (Da) | MH <sup>+</sup> Error (ppm)   | Protein MW/pI (Da) | Species        | Accession #              | MS-Digest Index #     | Protein Name                               |                 |                  |
|-------------------------|-------|----------------|------------------------------|------------------|----------------|--------------------------------|---------------------------------|----------------------------|-------------------------------|--------------------|----------------|--------------------------|-----------------------|--------------------------------------------|-----------------|------------------|
| 1                       | 9.59  | 87.1           | 8                            | 3/15             | Y308y          | (R)K/S F T P\D H V V/Y/A\R (S) | 1419.74                         | 80.3775                    | 274.1                         | 43476.3/5.51       | Homo sapiens   | <a href="#">42734430</a> | <a href="#">30481</a> | polymerase I and transcript release factor |                 |                  |
| Fragment-ion (m/z)      |       | 232.63         | 245.63                       | 246.88           | 249.49         | 380.31                         | 572.49                          | 578.47                     | 671.47                        | 673.32             | 830.56         | 929.45                   | 985.51                | 1268.88                                    | 1342.68         | 1355.67          |
| Frac. Inten. (% of TIC) |       | 6.43           | 3.51                         | 7.43             | 3.59           | 7.07                           | 3.27                            | 12.87                      | 11.08                         | 4.12               | 14.18          | 4.17                     | 5.17                  | 6.67                                       | 6.19            | 4.26             |
| Rel. Inten. (% of BP)   |       | 45.37          | 24.76                        | 52.39            | 25.36          | 49.89                          | 23.05                           | 90.79                      | 78.13                         | 29.05              | 100.00         | 29.43                    | 36.47                 | 47.03                                      | 43.65           | 30.07            |
| Score                   |       | 1.00           | 0.25                         | 0.25             | -0.25          | 1.00                           | 1.00                            | 1.00                       | 1.00                          | -0.29              | 1.00           | 1.00                     | -0.36                 | 1.00                                       | 1.00            | 1.00             |
| Ion-type                |       | c <sub>2</sub> | y <sub>2</sub>               | y <sub>2</sub>   |                | c <sub>3</sub>                 | z' <sub>4</sub>                 | c <sub>5</sub>             | c <sup>++</sup> <sub>11</sub> |                    | c <sub>7</sub> | c <sub>8</sub>           |                       | z' <sub>10</sub>                           | c <sub>11</sub> | z' <sub>11</sub> |
| Delta Da                |       | -0.53          | -0.53                        | 0.72             |                | 0.08                           | 0.25                            | 0.14                       | -0.34                         |                    | 0.14           | -0.03                    |                       | 0.32                                       | 0.06            | 0.08             |
|                         |       |                | y <sup>++</sup> <sub>3</sub> |                  |                | y <sup>+++</sup> <sub>9</sub>  |                                 |                            | z' <sub>5</sub>               |                    |                |                          |                       |                                            |                 |                  |
|                         |       |                | 0.53                         |                  |                | 0.47                           |                                 |                            | 0.17                          |                    |                |                          |                       |                                            |                 |                  |

# Peak 201

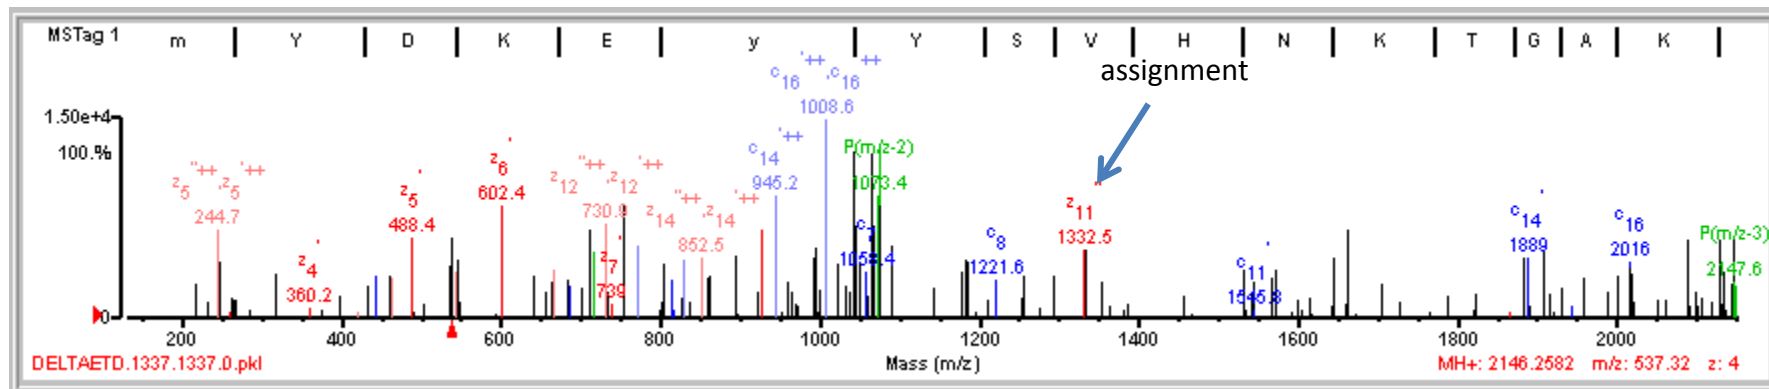

| Rank                    | Score            | SPI (%)        | BCS              | # Unmatched Ions            | Variable sites    | Sequence                                  | MH <sup>+</sup> Calculated (Da) | MH <sup>+</sup> Error (Da) | MH <sup>+</sup> Error (ppm) | Protein MW/pI (Da) | Species                     | Accession #              | MS-Digest Index #     | Protein Name                 |         |         |         |                   |         |         |                 |
|-------------------------|------------------|----------------|------------------|-----------------------------|-------------------|-------------------------------------------|---------------------------------|----------------------------|-----------------------------|--------------------|-----------------------------|--------------------------|-----------------------|------------------------------|---------|---------|---------|-------------------|---------|---------|-----------------|
| 1                       | 9.55             | 75.9           | 11               | 6/21                        | M1229m Y1234y     | (R) D/m Y D K/E/y/Y/S V/H N/K T\G A\K (L) | 2048.94                         | 97.3200                    | 633.1                       | 155542.2/7.02      | Homo sapiens                | <a href="#">42741655</a> | <a href="#">21037</a> | met proto-oncogene precursor |         |         |         |                   |         |         |                 |
| Fragment-ion (m/z)      | 244.73           | 443.12         | 463.32           | 488.44                      | 544.71            | 602.38                                    | 730.91                          | 754.78                     | 772.92                      | 852.48             | 926.69                      | 945.24                   | 996.61                | 1008.57                      | 1021.86 | 1090.68 | 1183.71 | 1332.51           | 1663.96 | 1908.96 | 2015.97         |
| Frac. Inten. (% of TIC) | 5.80             | 3.28           | 3.77             | 3.96                        | 5.20              | 5.57                                      | 4.68                            | 5.69                       | 3.59                        | 3.57               | 4.33                        | 6.02                     | 3.87                  | 9.83                         | 5.25    | 3.55    | 3.67    | 7.41              | 4.39    | 3.36    | 3.20            |
| Rel. Inten. (% of BP)   | 59.00            | 33.39          | 38.38            | 40.33                       | 52.91             | 56.62                                     | 47.60                           | 57.92                      | 36.49                       | 36.27              | 44.07                       | 61.26                    | 39.34                 | 100.00                       | 53.41   | 36.15   | 37.38   | 75.34             | 44.66   | 34.23   | 32.55           |
| Score                   | 1.00             | 1.00           | 1.00             | 1.00                        | 1.00              | 1.00                                      | 1.00                            | 0.25                       | 1.00                        | 1.00               | 0.25                        | 0.25                     | -0.39                 | 1.00                         | -0.53   | -0.36   | -0.37   | 0.25              | -0.45   | -0.34   | 1.00            |
| Ion-type                | z <sup>++5</sup> | c <sub>3</sub> | z <sup>++9</sup> | z <sub>5</sub> <sup>'</sup> | z <sup>++10</sup> | z <sub>6</sub> <sup>'</sup>               | z <sup>++12</sup>               | y <sub>7</sub>             | c <sup>++11</sup>           | z <sup>++14</sup>  | z <sub>9</sub> <sup>'</sup> | c <sup>++14</sup>        |                       | c <sup>++16</sup>            |         |         |         | z <sup>++11</sup> |         |         | c <sub>16</sub> |
| Delta Da                | 0.08             | -0.04          | 0.07             | 0.14                        | -0.07             | 0.04                                      | 0.09                            | -0.64                      | 0.13                        | 0.10               | 0.18                        | 0.35                     |                       | 0.16                         |         |         |         | -0.09             |         |         | 0.15            |
|                         |                  |                |                  |                             |                   |                                           |                                 |                            |                             |                    |                             |                          |                       | 0.64                         |         |         |         |                   |         |         |                 |







# Peak 204

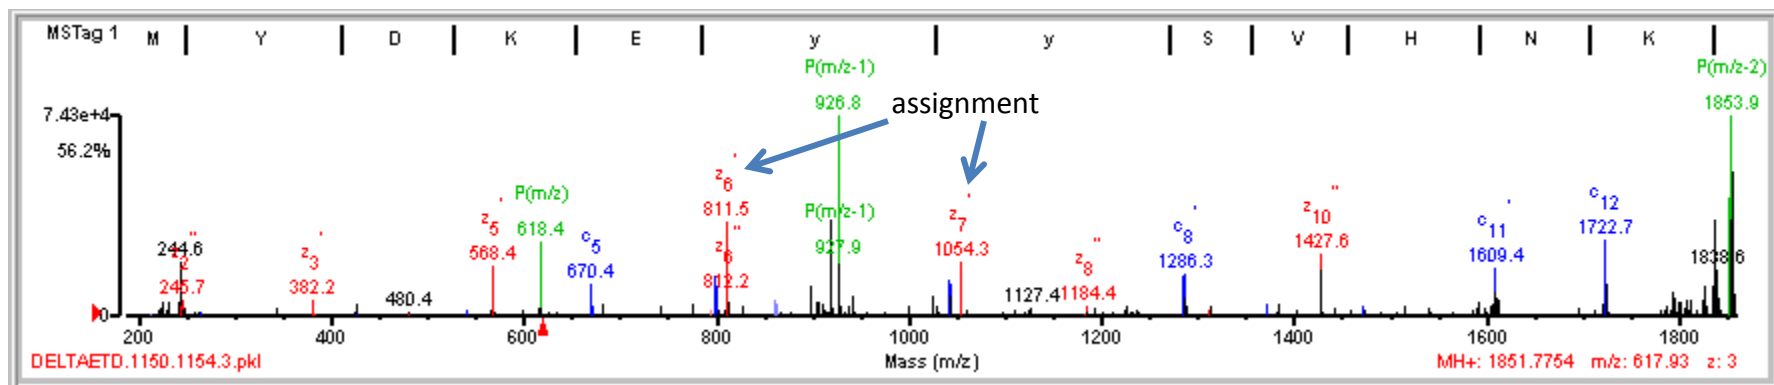

| Rank                    | Score  | SPI (%)         | BCS             | # Unmatched Ions | Variable sites | Sequence                          | MH <sup>+</sup> Calculated (Da) | MH <sup>+</sup> Error (Da) | MH <sup>+</sup> Error (ppm) | Protein MW/pl (Da) | Species      | Accession #              | MS-Digest Index #     | Protein Name                 |                |                 |                  |                |                   |                  |                   |                 |                  |         |                 |      |
|-------------------------|--------|-----------------|-----------------|------------------|----------------|-----------------------------------|---------------------------------|----------------------------|-----------------------------|--------------------|--------------|--------------------------|-----------------------|------------------------------|----------------|-----------------|------------------|----------------|-------------------|------------------|-------------------|-----------------|------------------|---------|-----------------|------|
| 1                       | 14.21  | 92.5            | 12              | 5/25             | Y1234y Y1235y  | (R) D/M/Y/D/K/E Y Y S/V H N/K (T) | 1691.74                         | 160.0384                   | 57.1                        | 155542.2/7.02      | Homo sapiens | <a href="#">42741655</a> | <a href="#">21037</a> | met proto-oncogene precursor |                |                 |                  |                |                   |                  |                   |                 |                  |         |                 |      |
| Fragment-ion (m/z)      | 230.84 | 244.65          | 382.21          | 568.37           | 670.42         | 799.47                            | 811.47                          | 861.76                     | 937.76                      | 942.84             | 1026.25      | 1042.41                  | 1042.73               | 1054.33                      | 1285.50        | 1286.30         | 1312.48          | 1372.47        | 1427.63           | 1472.64          | 1591.18           | 1605.74         | 1609.38          | 1612.12 | 1722.70         |      |
| Frac. Inten. (% of TIC) | 1.50   | 6.05            | 1.54            | 4.97             | 3.07           | 5.10                              | 10.06                           | 2.04                       | 1.31                        | 1.78               | 1.38         | 2.50                     | 5.85                  | 5.48                         | 2.74           | 6.00            | 1.20             | 1.53           | 8.78              | 1.40             | 1.54              | 2.19            | 6.60             | 1.50    | 13.92           |      |
| Rel. Inten. (% of BP)   | 10.77  | 43.48           | 11.03           | 35.72            | 22.06          | 36.64                             | 72.25                           | 14.66                      | 9.38                        | 12.76              | 9.92         | 17.95                    | 42.01                 | 39.35                        | 19.70          | 43.12           | 8.62             | 11.00          | 63.07             | 10.03            | 11.05             | 15.74           | 47.44            | 10.78   | 100.00          |      |
| Score                   | -0.11  | 1.00            | 1.00            | 1.00             | 1.00           | 1.00                              | 1.00                            | 1.00                       | -0.09                       | -0.13              | -0.10        | 1.00                     | 1.00                  | 1.00                         | 1.00           | 0.25            | 0.25             | 1.00           | 0.25              | 0.25             | 0.25              | 0.25            | 0.25             | 0.25    | -0.11           | 1.00 |
| Ion-type                |        | z' <sub>2</sub> | z' <sub>3</sub> | z' <sub>5</sub>  | c <sub>5</sub> | c <sub>6</sub>                    | z' <sub>6</sub>                 | c <sub>++12</sub>          |                             |                    |              | c <sub>7</sub>           | c <sub>7</sub>        | z' <sub>7</sub>              | c <sub>8</sub> | c' <sub>8</sub> | z'' <sub>9</sub> | c <sub>9</sub> | z'' <sub>10</sub> | c' <sub>10</sub> | z'' <sub>11</sub> | y <sub>11</sub> | c' <sub>11</sub> |         | c <sub>12</sub> |      |
| Delta Da                |        | -0.49           | 0.01            | 0.07             | 0.13           | 0.14                              | 0.14                            | -0.04                      |                             |                    |              | 0.05                     | 0.37                  | -0.03                        | 0.11           | -0.10           | -0.02            | 0.05           | 0.10              | 0.14             | 0.59              | 0.14            | -0.18            |         | 0.11            |      |



# Peak 206

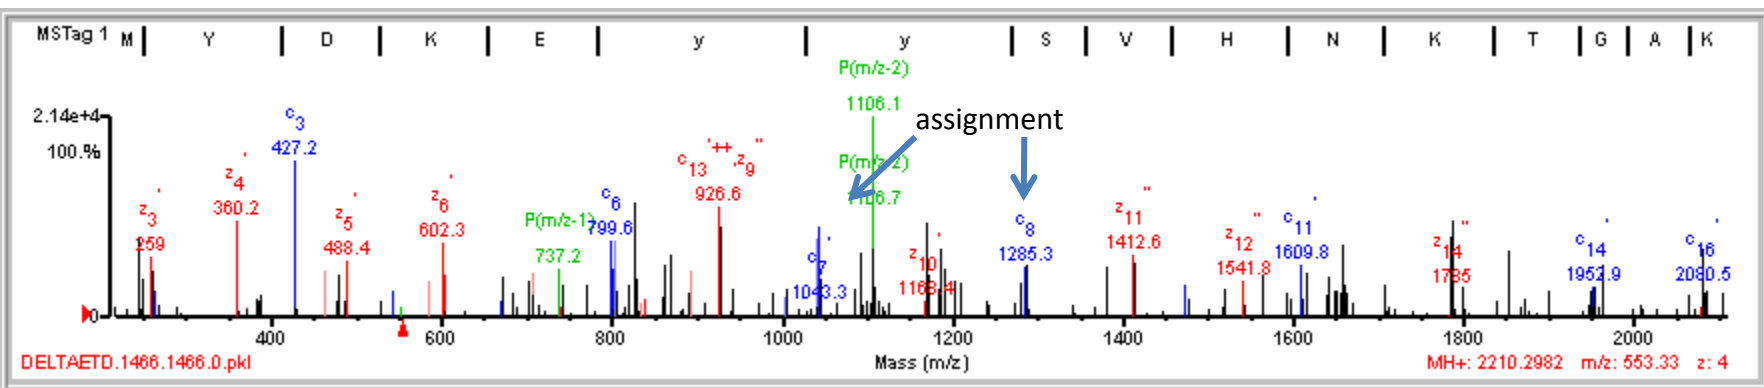

| Rank                    | Score | SPI (%)           | BCS            | # Unmatched Ions  | Variable sites | Sequence                                                  | MH <sup>+</sup> Calculated (Da) | MH <sup>+</sup> Error (Da) | MH <sup>+</sup> Error (ppm) | Protein MW/pI (Da) | Species            | Accession #              | MS-Digest Index #     | Protein Name                 |                |                 |                 |         |
|-------------------------|-------|-------------------|----------------|-------------------|----------------|-----------------------------------------------------------|---------------------------------|----------------------------|-----------------------------|--------------------|--------------------|--------------------------|-----------------------|------------------------------|----------------|-----------------|-----------------|---------|
| 1                       | 9.26  | 77.4              | 7              | 4/17              | Y1234y Y1235y  | (R) D M Y \ D K E   Y Y   S / V H   N   K   T G A \ K (L) | 2048.94                         | 161.3600                   | 645.7                       | 155542.2/7.02      | Homo sapiens       | <a href="#">42741655</a> | <a href="#">21037</a> | met proto-oncogene precursor |                |                 |                 |         |
| Fragment-ion (m/z)      |       | 245.92            | 360.17         | 427.24            | 602.32         | 706.54                                                    | 799.58                          | 804.95                     | 826.34                      | 862.45             | 926.57             | 1041.15                  | 1170.67               | 1285.30                      | 1412.60        | 1608.43         | 1658.13         | 1787.48 |
| Frac. Inten. (% of TIC) |       | 4.23              | 6.11           | 9.07              | 5.68           | 4.12                                                      | 5.81                            | 5.38                       | 5.14                        | 3.96               | 10.10              | 8.66                     | 6.47                  | 3.83                         | 5.31           | 5.13            | 4.88            | 6.13    |
| Rel. Inten. (% of BP)   |       | 41.92             | 60.51          | 89.76             | 56.27          | 40.82                                                     | 57.48                           | 53.25                      | 50.92                       | 39.17              | 100.00             | 85.73                    | 64.00                 | 37.91                        | 52.54          | 50.74           | 48.27           | 60.64   |
| Score                   |       | 0.25              | 1.00           | 1.00              | 1.00           | 1.00                                                      | 1.00                            | 1.00                       | -0.51                       | 1.00               | 1.00               | 1.00                     | -0.64                 | 1.00                         | 0.25           | 1.00            | -0.48           | -0.61   |
| Ion-type                |       | z <sup>+++5</sup> | z <sup>4</sup> | c <sub>3</sub>    | z <sup>6</sup> | z <sup>+++11</sup>                                        | c <sub>6</sub>                  | c <sup>+++11</sup>         |                             |                    | c <sup>+++12</sup> | c <sup>+++13</sup>       | c <sup>+++16</sup>    |                              | c <sub>8</sub> | z <sup>11</sup> | c <sub>11</sub> |         |
| Delta Da                |       | 0.76              | -0.03          | 0.08              | -0.02          | 0.26                                                      | 0.25                            | 0.17                       |                             |                    | 0.65               | 0.72                     | 0.75                  | -0.09                        | 0.04           | -0.12           |                 |         |
|                         |       |                   |                | y <sup>+++8</sup> |                |                                                           |                                 |                            |                             |                    | z <sup>9</sup>     |                          |                       |                              |                |                 |                 |         |
|                         |       |                   |                | -0.51             |                |                                                           |                                 |                            |                             |                    | 0.06               |                          |                       |                              |                |                 |                 |         |





# Peak 210

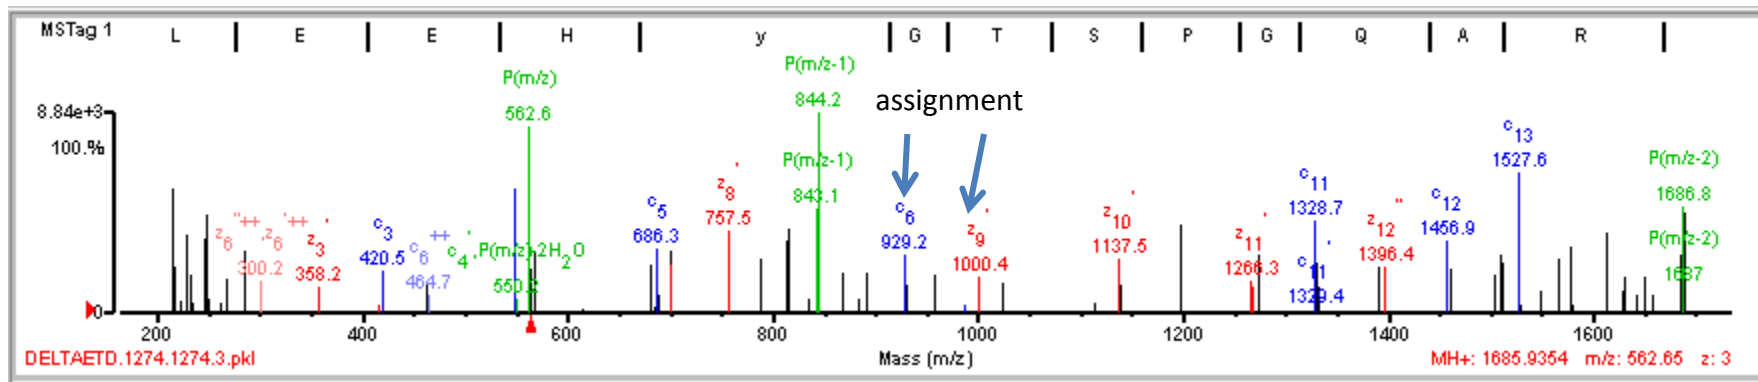

| Rank                    | Score                        | SPI (%)                     | BCS            | # Unmatched Ions | Variable sites | Sequence                            | MH <sup>+</sup> Calculated (Da) | MH <sup>+</sup> Error (Da)  | MH <sup>+</sup> Error (ppm) | Protein MW/pl (Da) | Species                      | Accession #                  | MS-Digest Index #     | Protein Name                            |         |         |                 |                              |                 |         |         |
|-------------------------|------------------------------|-----------------------------|----------------|------------------|----------------|-------------------------------------|---------------------------------|-----------------------------|-----------------------------|--------------------|------------------------------|------------------------------|-----------------------|-----------------------------------------|---------|---------|-----------------|------------------------------|-----------------|---------|---------|
| 1                       | 8.34                         | 71.1                        | 10             | 7/21             | Y266y          | (R) C/L E/E E\Y G/T S P/G\Q A\R (E) | 1604.71                         | 81.2233                     | 745.5                       | 92566.1/8.19       | Homo sapiens                 | <a href="#">4502371</a>      | <a href="#">22014</a> | breast cancer antiestrogen resistance 3 |         |         |                 |                              |                 |         |         |
| Fragment-ion (m/z)      | 215.45                       | 229.50                      | 245.56         | 248.89           | 285.90         | 549.08                              | 567.34                          | 686.34                      | 699.87                      | 757.51             | 929.19                       | 1137.49                      | 1198.44               | 1266.34                                 | 1328.66 | 1330.66 | 1456.94         | 1510.31                      | 1527.63         | 1579.12 | 1613.71 |
| Frac. Inten. (% of TIC) | 6.13                         | 3.90                        | 8.46           | 6.39             | 3.10           | 6.15                                | 3.16                            | 3.22                        | 5.60                        | 4.06               | 2.96                         | 5.50                         | 4.42                  | 3.49                                    | 4.84    | 3.82    | 4.42            | 5.43                         | 6.97            | 4.02    | 3.96    |
| Rel. Inten. (% of BP)   | 72.44                        | 46.08                       | 100.00         | 75.51            | 36.66          | 72.64                               | 37.33                           | 38.06                       | 66.13                       | 48.00              | 34.98                        | 64.93                        | 52.23                 | 41.21                                   | 57.18   | 45.07   | 52.26           | 64.13                        | 82.32           | 47.47   | 46.73   |
| Score                   | 0.25                         | 1.00                        | 0.25           | -0.76            | -0.37          | 1.00                                | -0.37                           | 1.00                        | 1.00                        | 1.00               | 1.00                         | 1.00                         | -0.52                 | 1.00                                    | 1.00    | -0.45   | 1.00            | 0.25                         | 1.00            | -0.47   | -0.47   |
| Ion-type                | y <sup>++</sup> <sub>4</sub> | z <sup>'</sup> <sub>2</sub> | y <sub>2</sub> |                  |                | c <sub>4</sub>                      | c <sub>5</sub>                  | z <sup>'</sup> <sub>7</sub> | z <sup>'</sup> <sub>8</sub> | c <sub>6</sub>     | z <sup>'</sup> <sub>10</sub> | z <sup>'</sup> <sub>11</sub> | c <sub>11</sub>       |                                         |         |         | c <sub>12</sub> | z <sup>'</sup> <sub>13</sub> | c <sub>13</sub> |         |         |
| Delta Da                | -0.67                        | -0.64                       | -0.60          |                  |                | -0.15                               | 0.05                            | -0.48                       | 0.14                        | -0.13              | 0.03                         | -0.16                        | 0.16                  |                                         |         |         | 0.38            | 0.67                         | 0.04            |         |         |



# Peak 211

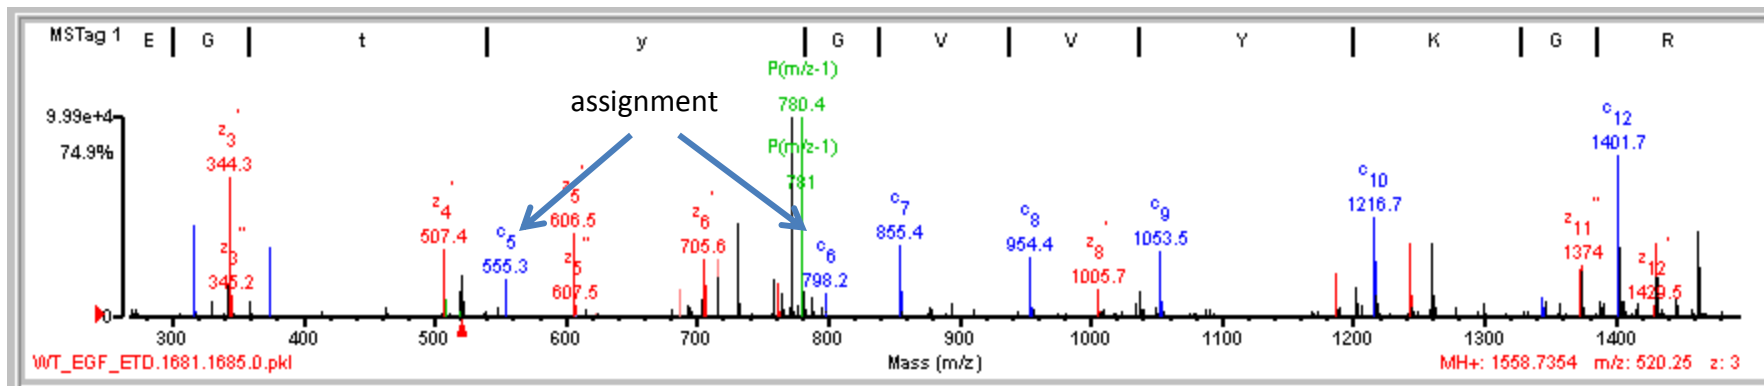

| Rank                   | Score          | SPI (%)        | BCS            | # Unmatched Ions | Variable sites | Sequence                          | MH <sup>+</sup> Calculated (Da) | MH <sup>+</sup> Error (Da) | MH <sup>+</sup> Error (ppm) | Protein MW/pi (Da) | Species        | Accession #              | MS-Digest Index #     | Protein Name                            |                 |                 |                 |                 |                 |                 |                 |                 |         |
|------------------------|----------------|----------------|----------------|------------------|----------------|-----------------------------------|---------------------------------|----------------------------|-----------------------------|--------------------|----------------|--------------------------|-----------------------|-----------------------------------------|-----------------|-----------------|-----------------|-----------------|-----------------|-----------------|-----------------|-----------------|---------|
| 1                      | 16.52          | 89.1           | 10             | 2/23             | T14t Y15y      | (K) I/G/E G t y G V V\Y K G\R (H) | 1398.74                         | 159.9979                   | 41.8                        | 34095.6/8.37       | Homo sapiens   | <a href="#">4502709</a>  | <a href="#">3565</a>  | cell division cycle 2 protein isoform 1 |                 |                 |                 |                 |                 |                 |                 |                 |         |
| 1                      | 16.52          | 89.1           | 10             | 2/23             | T14t Y15y      | (K) I/G/E G t y G V V\Y K G\R (H) | 1398.74                         | 159.9979                   | 41.8                        | 27502.9/6.54       | Homo sapiens   | <a href="#">16306492</a> | <a href="#">13150</a> | cell division cycle 2 protein isoform 2 |                 |                 |                 |                 |                 |                 |                 |                 |         |
| Fragment-ion (m/z)     | 215.51         | 317.21         | 344.29         | 374.28           | 606.46         | 705.58                            | 715.64                          | 731.79                     | 855.39                      | 954.37             | 1053.53        | 1186.74                  | 1202.62               | 1216.67                                 | 1243.78         | 1259.70         | 1344.59         | 1372.94         | 1373.99         | 1388.99         | 1401.72         | 1430.85         | 1462.92 |
| Frac. Inten.(% of TIC) | 1.80           | 3.62           | 5.64           | 2.94             | 3.49           | 3.21                              | 3.46                            | 3.87                       | 3.72                        | 2.51               | 3.61           | 3.64                     | 1.60                  | 8.19                                    | 4.55            | 5.62            | 2.00            | 2.81            | 4.24            | 1.62            | 14.93           | 5.94            | 6.99    |
| Rel. Inten.(% of BP)   | 12.07          | 24.23          | 37.80          | 19.68            | 23.38          | 21.50                             | 23.18                           | 25.94                      | 24.92                       | 16.82              | 24.15          | 24.35                    | 10.75                 | 54.84                                   | 30.45           | 37.65           | 13.42           | 18.83           | 28.37           | 10.88           | 100.00          | 39.76           | 46.78   |
| Score                  | 1.00           | 1.00           | 1.00           | 1.00             | 1.00           | 1.00                              | 1.00                            | -0.26                      | 1.00                        | 1.00               | 1.00           | 1.00                     | 1.00                  | 0.25                                    | 1.00            | 0.25            | 1.00            | 0.25            | 0.25            | 0.25            | 1.00            | 0.25            | -0.47   |
| Ion-type               | z <sub>2</sub> | c <sub>3</sub> | z <sub>3</sub> | c <sub>4</sub>   | z <sub>5</sub> | z <sub>6</sub>                    | z <sub>12</sub>                 |                            | c <sub>7</sub>              | c <sub>8</sub>     | c <sub>9</sub> | z <sub>9</sub>           | y <sub>9</sub>        | c <sub>10</sub>                         | z <sub>10</sub> | y <sub>10</sub> | c <sub>11</sub> | z <sub>11</sub> | z <sub>11</sub> | y <sub>11</sub> | c <sub>12</sub> | z <sub>12</sub> |         |
| Delta Da               | -0.61          | 0.03           | 0.07           | 0.08             | 0.11           | 0.16                              | 0.35                            |                            | 0.12                        | 0.03               | 0.12           | 0.26                     | 0.12                  | 0.20                                    | 0.28            | 0.18            | 0.03            | 0.39            | 0.44            | 0.43            | 0.13            | 0.27            |         |

# Peak 212

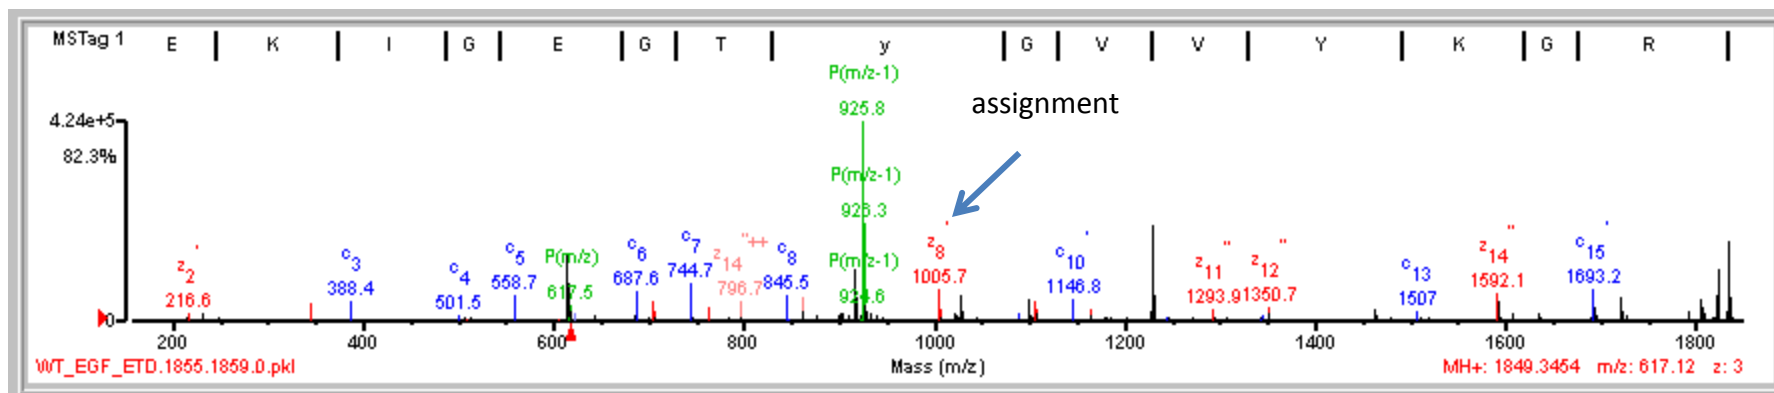

| Rank | Score | SPI (%) | BCS | # Unmatched Ions | Variable sites | Sequence                                | MH* Calculated (Da) | MH* Error (Da) | MH* Error (ppm) | Protein MW/pI (Da) | Species      | Accession #              | MS-Digest Index #     | Protein Name                            |
|------|-------|---------|-----|------------------|----------------|-----------------------------------------|---------------------|----------------|-----------------|--------------------|--------------|--------------------------|-----------------------|-----------------------------------------|
| 1    | 14.54 | 64.7    | 12  | 5/25             | Y15y           | (K) I/E/K I/G/E G T y G V V Y/R\G\R (H) | 1768.96             | 80.3862        | 227.1           | 34095.6/8.37       | Homo sapiens | <a href="#">4502709</a>  | <a href="#">3565</a>  | cell division cycle 2 protein isoform 1 |
| 1    | 14.54 | 64.7    | 12  | 5/25             | Y15y           | (K) I/E/K I/G/E G T y G V V Y/R\G\R (H) | 1768.96             | 80.3862        | 227.1           | 27502.9/6.54       | Homo sapiens | <a href="#">16306492</a> | <a href="#">13150</a> | cell division cycle 2 protein isoform 2 |

  

| Fragment-ion (m/z)     | 344.40 | 558.67 | 687.63 | 705.61 | 744.72 | 762.66 | 796.67 | 845.53 | 861.30 | 1005.72 | 1028.78 | 1088.79 | 1099.83 | 1106.77 | 1145.93 | 1163.82 | 1229.14 | 1229.72 | 1350.71 | 1592.08 | 1635.03 | 1692.09 | 1693.15 | 1720.82 | 1722.04 |
|------------------------|--------|--------|--------|--------|--------|--------|--------|--------|--------|---------|---------|---------|---------|---------|---------|---------|---------|---------|---------|---------|---------|---------|---------|---------|---------|
| Frac. Inten.(% of TIC) | 2.05   | 3.04   | 3.42   | 2.81   | 4.97   | 2.08   | 2.22   | 2.99   | 2.67   | 4.09    | 3.93    | 2.13    | 3.13    | 3.70    | 3.63    | 2.58    | 3.71    | 20.64   | 2.09    | 7.59    | 2.22    | 2.72    | 5.66    | 2.04    | 3.89    |
| Rel. Inten.(% of BP)   | 9.94   | 14.75  | 16.57  | 13.62  | 24.09  | 10.08  | 10.78  | 14.48  | 12.92  | 19.79   | 19.04   | 10.32   | 15.16   | 17.90   | 17.58   | 12.50   | 17.97   | 100.00  | 10.13   | 36.79   | 10.74   | 13.19   | 27.44   | 9.90    | 18.85   |
| Score                  | 1.00   | 1.00   | 1.00   | 1.00   | 1.00   | 1.00   | 1.00   | 1.00   | 0.25   | 1.00    | -0.19   | 1.00    | -0.15   | 1.00    | 1.00    | 1.00    | -0.18   | -1.00   | 0.25    | 0.25    | 1.00    | 1.00    | 0.25    | 0.25    | -0.19   |
| Ion-type               | c++6   | c5     | c6     | z'6    | c7     | z'7    | z'+14  | c8     | z'+15  | z'8     |         | c9      |         | z'9     | c10     | z'10    |         |         | z'12    | z'14    | c14     | c15     | c'15    | z'15    |         |
| Delta Da               | 0.19   | 0.31   | 0.23   | 0.19   | 0.29   | 0.22   | 0.78   | 0.06   | 0.38   | 0.25    |         | 0.29    |         | 0.25    | 0.41    | 0.28    |         |         | 0.10    | 0.29    | 0.21    | 0.25    | 0.30    | -0.01   |         |



# Peak 215

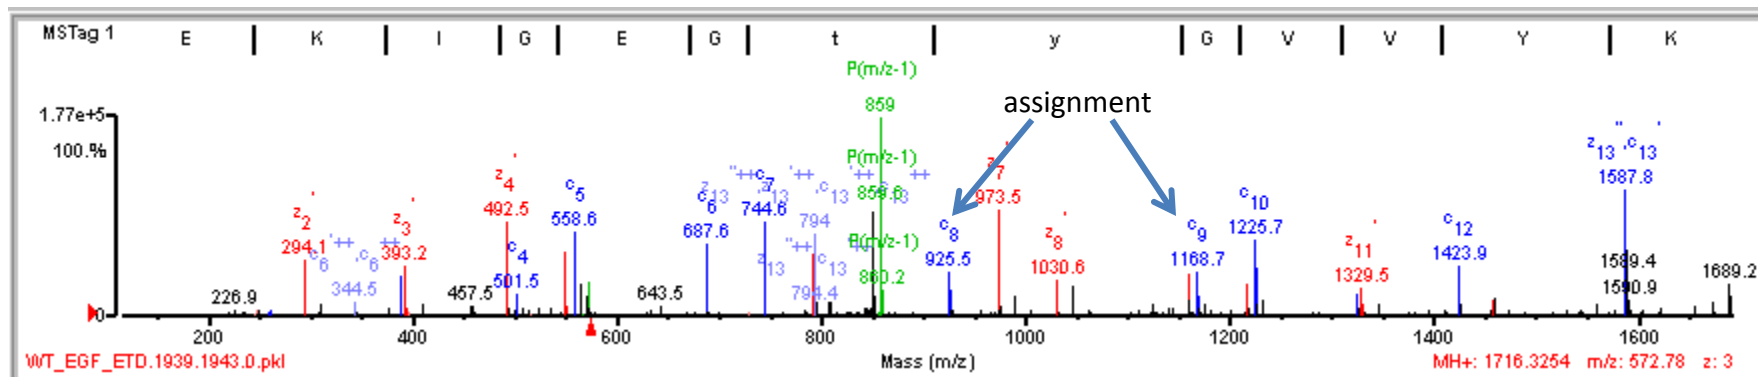

| Rank                   | Score          | SPI (%)        | BCS            | # Unmatched Ions | Variable sites | Sequence                              | MH+ Calculated (Da) | MH+ Error (Da) | MH+ Error (ppm) | Protein MW/pi (Da) | Species         | Accession #              | MS-Digest Index #     | Protein Name                            |                |                |                |                 |                 |                 |                 |                 |                 |                 |
|------------------------|----------------|----------------|----------------|------------------|----------------|---------------------------------------|---------------------|----------------|-----------------|--------------------|-----------------|--------------------------|-----------------------|-----------------------------------------|----------------|----------------|----------------|-----------------|-----------------|-----------------|-----------------|-----------------|-----------------|-----------------|
| 1                      | 20.25          | 100.0          | 13             | 0/24             | T14t Y15y      | (K) I/E/K I/G/E I/t I/y G/V/V Y/K (G) | 1555.84             | 160.4888       | 324.0           | 34095.6/8.37       | Homo sapiens    | <a href="#">4502709</a>  | <a href="#">3565</a>  | cell division cycle 2 protein isoform 1 |                |                |                |                 |                 |                 |                 |                 |                 |                 |
| 1                      | 20.25          | 100.0          | 13             | 0/24             | T14t Y15y      | (K) I/E/K I/G/E I/t I/y G/V/V Y/K (G) | 1555.84             | 160.4888       | 324.0           | 27502.9/6.54       | Homo sapiens    | <a href="#">16306492</a> | <a href="#">13150</a> | cell division cycle 2 protein isoform 2 |                |                |                |                 |                 |                 |                 |                 |                 |                 |
| Fragment-ion (m/z)     | 294.11         | 388.29         | 393.21         | 492.48           | 549.47         | 558.59                                | 565.46              | 687.56         | 744.61          | 792.47             | 793.99          | 808.44                   | 925.53                | 973.49                                  | 1030.58        | 1159.69        | 1168.70        | 1217.20         | 1225.67         | 1325.66         | 1329.52         | 1423.88         | 1459.04         | 1587.76         |
| Frac. Inten.(% of TIC) | 3.08           | 1.94           | 2.90           | 5.41             | 3.60           | 3.77                                  | 1.66                | 4.76           | 6.81            | 2.86               | 6.89            | 1.86                     | 3.79                  | 8.03                                    | 3.94           | 4.25           | 3.62           | 1.90            | 6.43            | 1.91            | 2.55            | 4.64            | 1.67            | 11.73           |
| Rel. Inten.(% of BP)   | 26.24          | 16.49          | 24.71          | 46.15            | 30.67          | 32.16                                 | 14.12               | 40.59          | 58.07           | 24.37              | 58.74           | 15.87                    | 32.30                 | 68.44                                   | 33.54          | 36.25          | 30.82          | 16.22           | 54.84           | 16.27           | 21.73           | 39.54           | 14.28           | 100.00          |
| Score                  | 1.00           | 1.00           | 1.00           | 1.00             | 1.00           | 1.00                                  | 0.25                | 1.00           | 1.00            | 1.00               | 1.00            | 0.25                     | 1.00                  | 1.00                                    | 1.00           | 1.00           | 1.00           | 1.00            | 1.00            | 0.25            | 1.00            | 1.00            | 0.25            | 0.25            |
| Ion-type               | z <sub>2</sub> | c <sub>3</sub> | z <sub>3</sub> | y <sub>4</sub>   | z <sub>5</sub> | c <sub>5</sub>                        | y <sub>5</sub>      | c <sub>6</sub> | c <sub>7</sub>  | z <sub>6</sub>     | c <sub>13</sub> | y <sub>6</sub>           | c <sub>8</sub>        | z <sub>7</sub>                          | z <sub>8</sub> | z <sub>9</sub> | c <sub>9</sub> | z <sub>10</sub> | c <sub>10</sub> | c <sub>11</sub> | z <sub>11</sub> | c <sub>12</sub> | z <sub>12</sub> | c <sub>13</sub> |
| Delta Da               | -0.05          | 0.03           | -0.02          | 0.59             | 0.15           | 0.23                                  | 0.13                | 0.16           | 0.18            | 0.12               | 0.14            | 0.08                     | 0.09                  | 0.13                                    | 0.20           | 0.27           | 0.23           | 0.76            | 0.18            | 0.09            | -0.01           | 0.25            | 0.41            | 0.09            |

# Peak 216

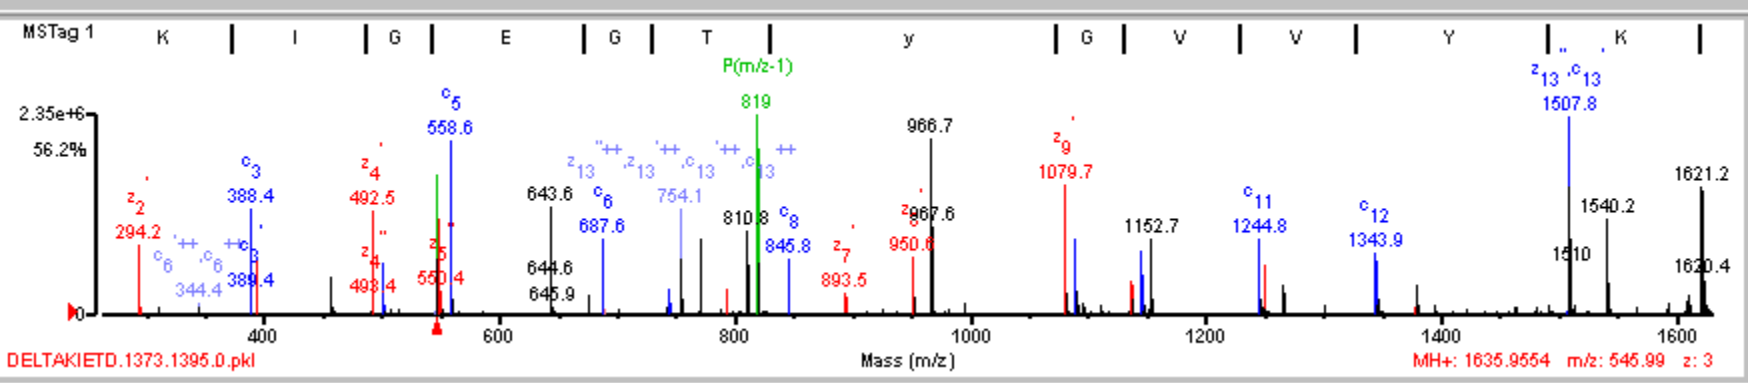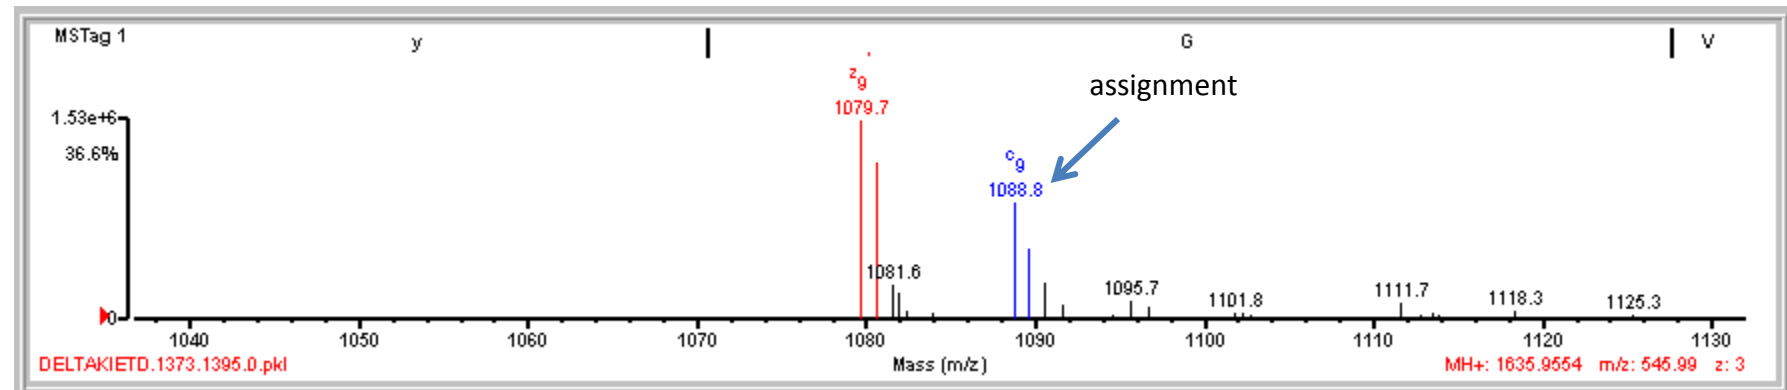

| Rank | Score | SPI (%) | BCS | Unmatched Ions | Variable sites | Sequence                              | m/z Calculated (Da) | m/z Error (Da) | m/z Error (ppm) | Protein MW/pI (Da) | Species      | Accession #              | MS-Digest Index #     | Protein Name                            |
|------|-------|---------|-----|----------------|----------------|---------------------------------------|---------------------|----------------|-----------------|--------------------|--------------|--------------------------|-----------------------|-----------------------------------------|
| 1    | 17.96 | 86.9    | 12  | 3/25           | Y15y           | (K) I/E/R/K I G E G T\Y G V V Y\K (G) | 1555.84             | 80.1188        | 93.2            | 34095.6/8.37       | Homo sapiens | <a href="#">4502709</a>  | <a href="#">3565</a>  | cell division cycle 2 protein isoform 1 |
| 1    | 17.96 | 86.9    | 12  | 3/25           | Y15y           | (K) I/E/R/K I G E G T\Y G V V Y\K (G) | 1555.84             | 80.1188        | 93.2            | 27502.9/6.54       | Homo sapiens | <a href="#">16306492</a> | <a href="#">13150</a> | cell division cycle 2 protein isoform 2 |

  

| Fragment-ion (m/z)      | 294.21         | 388.39         | 393.39         | 492.49         | 501.60         | 549.47         | 558.59         | 643.58 | 687.56         | 754.13                        | 770.54 | 845.82         | 950.55         | 966.67         | 1079.69        | 1088.77        | 1136.83         | 1145.73         | 1152.74         | 1244.85         | 1249.91         | 1343.93         | 1378.80         | 1507.81         | 1540.18                               |
|-------------------------|----------------|----------------|----------------|----------------|----------------|----------------|----------------|--------|----------------|-------------------------------|--------|----------------|----------------|----------------|----------------|----------------|-----------------|-----------------|-----------------|-----------------|-----------------|-----------------|-----------------|-----------------|---------------------------------------|
| Frac. Inten. (% of TIC) | 2.12           | 3.35           | 1.69           | 3.18           | 1.76           | 3.30           | 6.61           | 4.38   | 3.04           | 4.73                          | 3.29   | 1.75           | 3.06           | 7.50           | 7.03           | 3.97           | 2.29            | 3.09            | 3.41            | 3.68            | 2.51            | 4.25            | 2.01            | 12.57           | 5.44                                  |
| Rel. Inten. (% of BP)   | 16.87          | 26.64          | 13.47          | 25.29          | 14.03          | 26.29          | 52.55          | 34.83  | 24.18          | 37.66                         | 26.15  | 13.90          | 24.30          | 59.68          | 55.89          | 31.57          | 18.20           | 24.56           | 27.09           | 29.28           | 29.55           | 33.84           | 16.01           | 100.00          | 43.26                                 |
| Score                   | 1.00           | 1.00           | 1.00           | 1.00           | 1.00           | 1.00           | 1.00           | -0.35  | 1.00           | 1.00                          | -0.26  | 1.00           | 1.00           | 0.25           | 1.00           | 1.00           | 1.00            | 1.00            | 0.25            | 1.00            | 1.00            | 1.00            | 0.25            | 0.25            | -0.43                                 |
| Ion-type                | z <sub>2</sub> | c <sub>3</sub> | z <sub>3</sub> | z <sub>4</sub> | c <sub>4</sub> | z <sub>5</sub> | c <sub>5</sub> |        | c <sub>6</sub> | c <sup>++</sup> <sub>13</sub> |        | c <sub>8</sub> | z <sub>8</sub> | y <sub>8</sub> | z <sub>9</sub> | c <sub>9</sub> | z <sub>10</sub> | c <sub>10</sub> | y <sub>10</sub> | c <sub>11</sub> | z <sub>11</sub> | c <sub>12</sub> | z <sub>12</sub> | c <sub>13</sub> |                                       |
| Delta Da                | 0.05           | 0.13           | 0.16           | 0.20           | 0.26           | 0.15           | 0.23           |        | 0.16           | 0.26                          |        | 0.35           | 0.14           | 0.24           | 0.23           | 0.27           | 0.35            | 0.21            | 0.24            | 0.26            | 0.35            | 0.27            | 0.13            | 0.08            | z <sup>++</sup> <sub>13</sub><br>0.28 |

# Peak 217

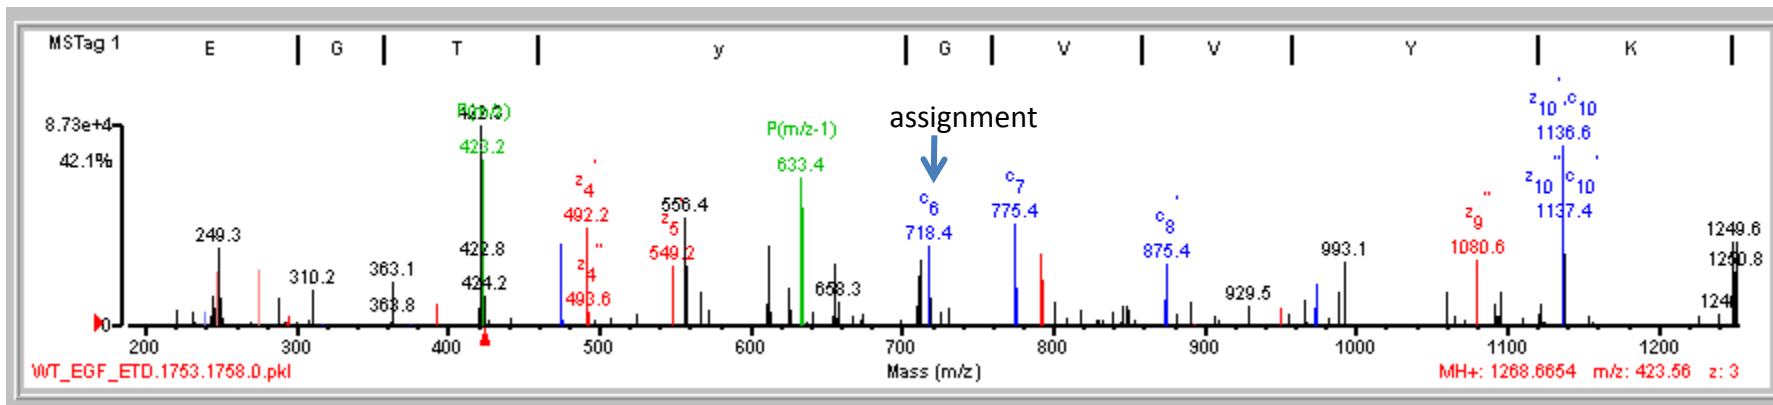

| Rank | Score | SPI (%) | BCS | # Unmatched Ions | Variable sites | Sequence                      | MH <sup>+</sup> Calculated (Da) | MH <sup>+</sup> Error (Da) | MH <sup>+</sup> Error (ppm) | Protein MW/pI (Da) | Species      | Accession #              | MS-Digest Index #     | Protein Name                            |
|------|-------|---------|-----|------------------|----------------|-------------------------------|---------------------------------|----------------------------|-----------------------------|--------------------|--------------|--------------------------|-----------------------|-----------------------------------------|
| 1    | 8.21  | 68.0    | 8   | 7/20             | Y15y           | (K) I/G/E G T Y G V V Y K (G) | 1185.62                         | 83.0504                    | 2431.0                      | 34095.6/8.37       | Homo sapiens | <a href="#">4502709</a>  | <a href="#">3565</a>  | cell division cycle 2 protein isoform 1 |
| 1    | 8.21  | 68.0    | 8   | 7/20             | Y15y           | (K) I/G/E G T Y G V V Y K (G) | 1185.62                         | 83.0504                    | 2431.0                      | 27502.9/6.54       | Homo sapiens | <a href="#">16306492</a> | <a href="#">13150</a> | cell division cycle 2 protein isoform 2 |
| 1    | 8.21  | 68.0    | 8   | 7/20             | Y15y           | (K) I/G/E G T Y G V V Y K (A) | 1185.62                         | 83.0504                    | 2431.0                      | 35045.9/8.86       | Homo sapiens | <a href="#">4557439</a>  | <a href="#">20493</a> | cyclin-dependent kinase 3               |
| 1    | 8.21  | 68.0    | 8   | 7/20             | Y15y           | (K) I/G/E G T Y G V V Y K (A) | 1185.62                         | 83.0504                    | 2431.0                      | 33929.7/8.80       | Homo sapiens | <a href="#">16936528</a> | <a href="#">30029</a> | cyclin-dependent kinase 2 isoform 1     |
| 1    | 8.21  | 68.0    | 8   | 7/20             | Y15y           | (K) I/G/E G T Y G V V Y K (A) | 1185.62                         | 83.0504                    | 2431.0                      | 30084.1/9.14       | Homo sapiens | <a href="#">16936530</a> | <a href="#">30881</a> | cyclin-dependent kinase 2 isoform 2     |

| Fragment-ion (m/z)      | 246.82           | 249.29 | 275.15           | 363.13 | 475.27         | 492.25           | 549.23           | 556.36 | 612.31 | 655.45 | 711.28 | 718.45         | 775.43         | 792.28           | 875.41         | 974.24           | 993.11 | 1080.56          | 1095.45        | 1136.63           |      |
|-------------------------|------------------|--------|------------------|--------|----------------|------------------|------------------|--------|--------|--------|--------|----------------|----------------|------------------|----------------|------------------|--------|------------------|----------------|-------------------|------|
| Frac. Inten. (% of TIC) | 5.23             | 5.40   | 2.58             | 2.47   | 4.17           | 5.21             | 2.79             | 8.30   | 3.71   | 3.39   | 5.45   | 5.82           | 7.17           | 5.48             | 2.91           | 3.23             | 3.31   | 3.07             | 2.45           | 17.86             |      |
| Rel. Inten. (% of BP)   | 29.27            | 30.24  | 14.44            | 13.85  | 23.32          | 29.18            | 15.59            | 46.46  | 20.76  | 18.98  | 30.52  | 32.61          | 40.13          | 30.69            | 16.31          | 18.09            | 18.55  | 17.20            | 13.73          | 100.00            |      |
| Score                   | 1.00             | -0.30  | 1.00             | -0.14  | 1.00           | 1.00             | 1.00             | -0.46  | -0.21  | -0.19  | -0.31  | 1.00           | 1.00           | 1.00             | 0.25           | 0.25             | -0.19  | 0.25             | 0.25           | 1.00              |      |
| Ion-type                | z <sup>++4</sup> |        | z <sup>++5</sup> |        | c <sub>5</sub> | z <sub>4</sub> ' | z <sub>5</sub> ' |        |        |        |        | c <sub>6</sub> | c <sub>7</sub> | z <sub>6</sub> ' | c <sub>8</sub> | c <sub>9</sub> ' |        | z <sub>9</sub> ' | y <sub>9</sub> | c <sub>10</sub>   |      |
| Delta Da                | 0.17             |        | -0.01            |        | 0.02           | -0.04            | -0.09            |        |        |        |        | 0.17           | 0.13           | -0.07            | 0.03           | -0.21            |        | 0.10             | -0.03          | 0.13              |      |
|                         |                  |        |                  |        |                |                  |                  |        |        |        |        |                |                |                  |                |                  |        |                  |                | z <sub>10</sub> ' | 0.15 |

# Peak 218

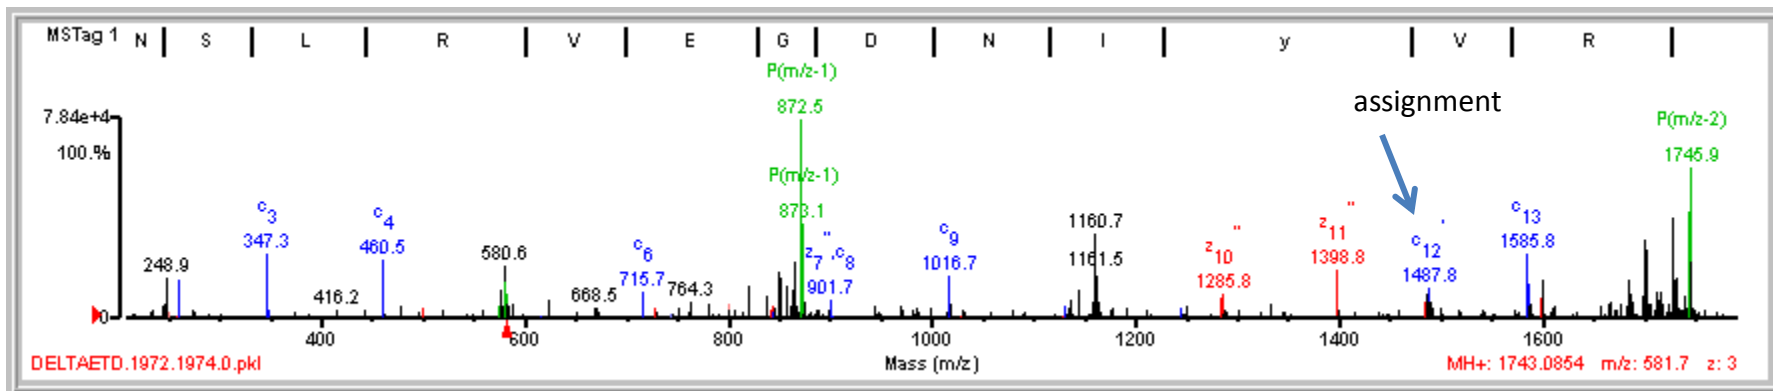

| Rank                    | Score                         | SPI (%)        | BCS            | # Unmatched Ions | Variable sites | Sequence                            | MH <sup>+</sup> Calculated (Da) | MH <sup>+</sup> Error (Da) | MH <sup>+</sup> Error (ppm) | Protein MW/pl (Da) | Species      | Accession #             | MS-Digest Index #     | Protein Name                                 |                              |                              |                 |                              |                 |         |                              |                              |         |
|-------------------------|-------------------------------|----------------|----------------|------------------|----------------|-------------------------------------|---------------------------------|----------------------------|-----------------------------|--------------------|--------------|-------------------------|-----------------------|----------------------------------------------|------------------------------|------------------------------|-----------------|------------------------------|-----------------|---------|------------------------------|------------------------------|---------|
| 1                       | 9.86                          | 66.8           | 9              | 8/23             | Y623y          | (K) K/N/S/L/R/V/E G/D/N I Y/V/R (H) | 1662.89                         | 80.1933                    | 130.2                       | 112588.6/5.34      | Homo sapiens | <a href="#">4503579</a> | <a href="#">16503</a> | erythrocyte membrane protein band 4.1-like 2 |                              |                              |                 |                              |                 |         |                              |                              |         |
| Fragment-ion (m/z)      | 248.91                        | 260.06         | 347.27         | 460.46           | 715.70         | 800.09                              | 821.35                          | 838.42                     | 849.91                      | 1016.66            | 1134.66      | 1144.56                 | 1160.71               | 1164.19                                      | 1284.94                      | 1397.81                      | 1486.68         | 1487.85                      | 1585.82         | 1588.17 | 1598.01                      | 1599.87                      | 1666.55 |
| Frac. Inten. (% of TIC) | 2.90                          | 3.74           | 5.35           | 5.41             | 2.04           | 2.22                                | 2.35                            | 2.21                       | 3.35                        | 3.55               | 2.10         | 3.54                    | 15.55                 | 2.42                                         | 4.11                         | 7.28                         | 3.05            | 5.47                         | 9.28            | 2.95    | 2.29                         | 6.55                         | 2.31    |
| Rel. Inten. (% of BP)   | 18.62                         | 24.02          | 34.37          | 34.78            | 13.10          | 14.25                               | 15.10                           | 14.22                      | 21.51                       | 22.83              | 13.53        | 22.74                   | 100.00                | 15.53                                        | 26.45                        | 46.80                        | 19.59           | 35.17                        | 59.66           | 18.96   | 14.75                        | 42.11                        | 14.87   |
| Score                   | 0.25                          | 1.00           | 1.00           | 1.00             | 1.00           | 1.00                                | -0.15                           | -0.14                      | -0.22                       | 1.00               | -0.14        | 0.25                    | -1.00                 | -0.16                                        | 1.00                         | 1.00                         | 1.00            | 0.25                         | 1.00            | -0.19   | 1.00                         | 0.25                         | -0.15   |
| Ion-type                | y <sup>+++</sup> <sub>5</sub> | c <sub>2</sub> | c <sub>3</sub> | c <sub>4</sub>   | c <sub>6</sub> | z <sup>+++</sup> <sub>13</sub>      |                                 |                            |                             | c <sub>9</sub>     |              | y <sub>9</sub>          |                       |                                              | z <sup>'</sup> <sub>10</sub> | z <sup>'</sup> <sub>11</sub> | c <sub>12</sub> | c <sup>'</sup> <sub>12</sub> | c <sub>13</sub> |         | z <sup>'</sup> <sub>13</sub> | z <sup>'</sup> <sub>13</sub> |         |
| Delta Da                | 0.12                          | -0.11          | 0.07           | 0.17             | 0.24           | 0.21                                |                                 |                            |                             | 0.11               |              | 0.06                    |                       |                                              | 0.35                         | 0.14                         | -0.02           | 0.14                         | 0.05            |         | -0.73                        | 0.12                         |         |

# Peak 219

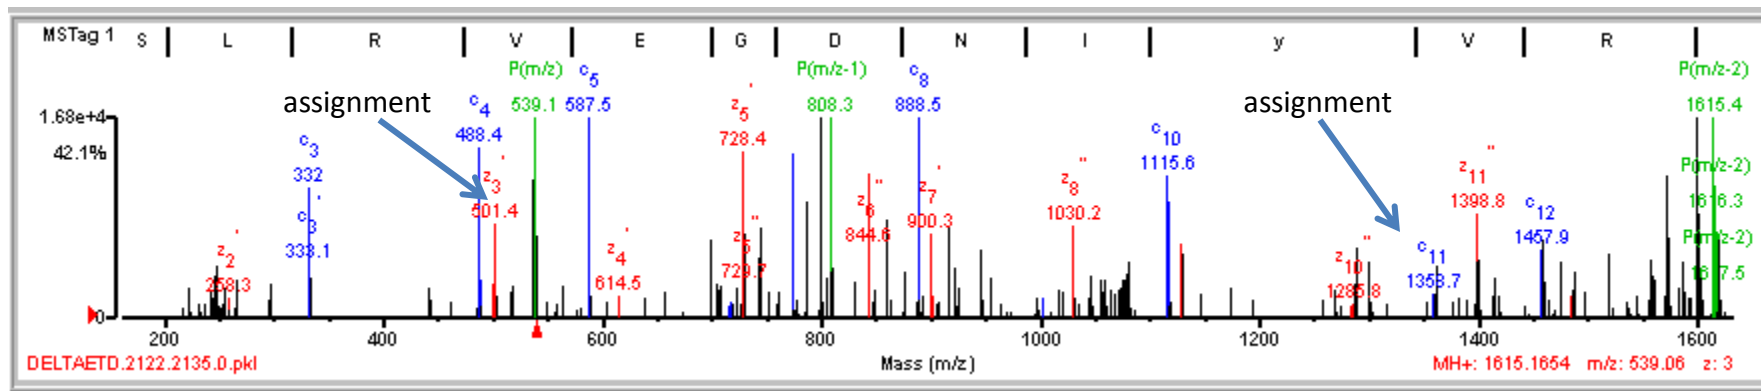

| Rank                    | Score             | SPI (%)        | BCS            | # Unmatched Ions   | Variable sites | Sequence                          | MH* Calculated (Da) | MH* Error (Da)     | MH* Error (ppm) | Protein MW/pI (Da) | Species        | Accession #             | MS-Digest Index #     | Protein Name                                 |                |        |                |         |         |         |                 |                |                |                 |                 |
|-------------------------|-------------------|----------------|----------------|--------------------|----------------|-----------------------------------|---------------------|--------------------|-----------------|--------------------|----------------|-------------------------|-----------------------|----------------------------------------------|----------------|--------|----------------|---------|---------|---------|-----------------|----------------|----------------|-----------------|-----------------|
| 1                       | 15.24             | 91.6           | 10             | 4/25               | Y623y          | (K) N/S/L/R V E/G D N I y V R (H) | 1534.80             | 80.3682            | 248.8           | 112588.6/5.34      | Homo sapiens   | <a href="#">4503579</a> | <a href="#">16503</a> | erythrocyte membrane protein band 4.1-like 2 |                |        |                |         |         |         |                 |                |                |                 |                 |
| Fragment-ion (m/z)      | 245.67            | 331.96         | 488.45         | 501.37             | 587.48         | 728.36                            | 730.01              | 742.90             | 744.50          | 773.69             | 843.33         | 859.45                  | 888.54                | 900.34                                       | 916.49         | 946.08 | 1029.27        | 1075.38 | 1078.60 | 1080.58 | 1115.55         | 1128.30        | 1129.92        | 1398.76         | 1458.50         |
| Frac. Inten. (% of TIC) | 2.03              | 4.68           | 4.61           | 3.80               | 7.73           | 4.17                              | 2.05                | 1.95               | 1.89            | 6.38               | 4.50           | 2.05                    | 16.47                 | 2.32                                         | 3.29           | 2.03   | 3.81           | 1.71    | 2.11    | 2.54    | 5.65            | 1.70           | 2.25           | 5.18            | 5.11            |
| Rel. Inten. (% of BP)   | 12.35             | 28.44          | 27.97          | 23.07              | 46.95          | 25.34                             | 12.45               | 11.85              | 11.49           | 38.72              | 27.31          | 12.47                   | 100.00                | 14.06                                        | 19.96          | 12.30  | 23.12          | 10.38   | 12.80   | 15.41   | 34.32           | 10.31          | 13.66          | 31.48           | 31.01           |
| Score                   | 0.25              | 1.00           | 1.00           | 1.00               | 1.00           | 1.00                              | 1.00                | 0.25               | 1.00            | 1.00               | 1.00           | 0.25                    | 1.00                  | 0.25                                         | 0.25           | -0.12  | 1.00           | -0.10   | -0.13   | -0.15   | 1.00            | 1.00           | 0.25           | 0.25            | 0.25            |
| Ion-type                | c <sup>+++4</sup> | c <sub>3</sub> | c <sub>4</sub> | y <sup>+++12</sup> | c <sub>5</sub> | z <sub>5</sub>                    | c <sup>+++12</sup>  | z <sup>+++12</sup> | y <sub>5</sub>  | c <sub>7</sub>     | z <sub>6</sub> | y <sub>6</sub>          | c <sub>8</sub>        | z <sub>7</sub>                               | y <sub>7</sub> |        | z <sub>8</sub> |         |         |         | c <sub>10</sub> | z <sub>9</sub> | z <sub>9</sub> | z <sub>11</sub> | c <sub>12</sub> |
| Delta Da                | 0.52              | -0.23          | 0.16           | 0.46               | 0.12           | 0.03                              | 0.67                | 0.05               | 0.16            | 0.26               | -0.02          | 0.08                    | 0.09                  | -0.03                                        | 0.10           |        | -0.15          |         |         |         | -0.03           | -0.18          | 0.43           | 0.08            | -0.19           |



# Peak 220

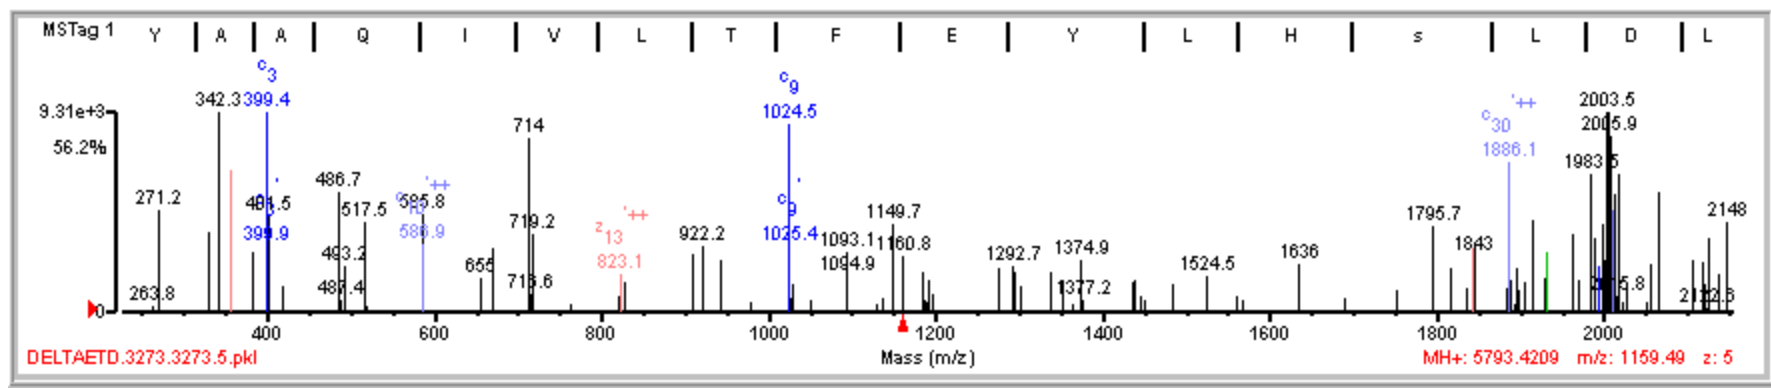

| Rank                    | Score  | SPI (%) | BCS    | # Unmatched Ions | Variable sites          | Sequence                                                                                                | MH* Calculated (Da) | MH* Error (Da) | MH* Error (ppm) | Protein MW/pi (Da) | Species      | Accession # | MS-Digest Index # | Protein Name                                                   |         |         |         |         |         |         |
|-------------------------|--------|---------|--------|------------------|-------------------------|---------------------------------------------------------------------------------------------------------|---------------------|----------------|-----------------|--------------------|--------------|-------------|-------------------|----------------------------------------------------------------|---------|---------|---------|---------|---------|---------|
| 1                       | 7.68   | 55.9    | 11     | 9/20             | T184I Y157y Y165y Y180y | (R) F Y A A Q I V L T F E y L H S L D L I y R D L K P E N L L / I V D H Q G y I Q V t D F G F A K R (V) | 5473.86             | 319.5585       | -53.0           | 40622.9/8.84       | Homo sapiens | 4506057     | 8042              | cAMP-dependent protein kinase catalytic subunit beta isoform 2 |         |         |         |         |         |         |
| Fragment-ion (m/z)      | 271.17 | 342.34  | 355.71 | 399.43           | 486.67                  | 585.81                                                                                                  | 713.95              | 909.48         | 1024.46         | 1844.26            | 1886.07      | 1983.50     | 1988.86           | 1993.27                                                        | 2003.51 | 2005.88 | 2008.46 | 2011.45 | 2017.05 | 2065.26 |
| Frac. Inten. (% of TIC) | 2.56   | 5.65    | 3.35   | 13.29            | 3.10                    | 3.90                                                                                                    | 4.33                | 2.34           | 6.46            | 3.49               | 3.51         | 3.26        | 2.19              | 2.15                                                           | 9.94    | 10.22   | 4.51    | 7.25    | 5.31    | 2.81    |
| Rel. Inten. (% of BP)   | 19.28  | 42.49   | 25.23  | 100.00           | 23.32                   | 29.33                                                                                                   | 32.60               | 17.80          | 48.63           | 26.30              | 26.40        | 24.51       | 16.52             | 16.20                                                          | 74.78   | 76.90   | 36.92   | 54.54   | 39.98   | 21.13   |
| Score                   | 1.00   | 1.00    | 1.00   | 1.00             | -0.23                   | 1.00                                                                                                    | 1.00                | -0.18          | 1.00            | 1.00               | 1.00         | -0.25       | -0.17             | 1.00                                                           | -0.75   | -0.77   | -0.37   | 1.00    | -0.40   | -0.21   |
| Ion-type                | c3+    | c3+     | c3+    | c3+              | c3+                     | c3+                                                                                                     | c3+                 | c3+            | c3+             | c3+                | c3+          | c3+         | c3+               | c3+                                                            | c3+     | c3+     | c3+     | c3+     | c3+     | c3+     |
| Delta Da                | 0.35   | 0.14    | -0.48  | 0.23             | -0.52                   | 0.30                                                                                                    | -0.12               | 0.39           | 0.81            |                    |              |             |                   |                                                                |         |         |         | -0.05   |         |         |

# Peak 221

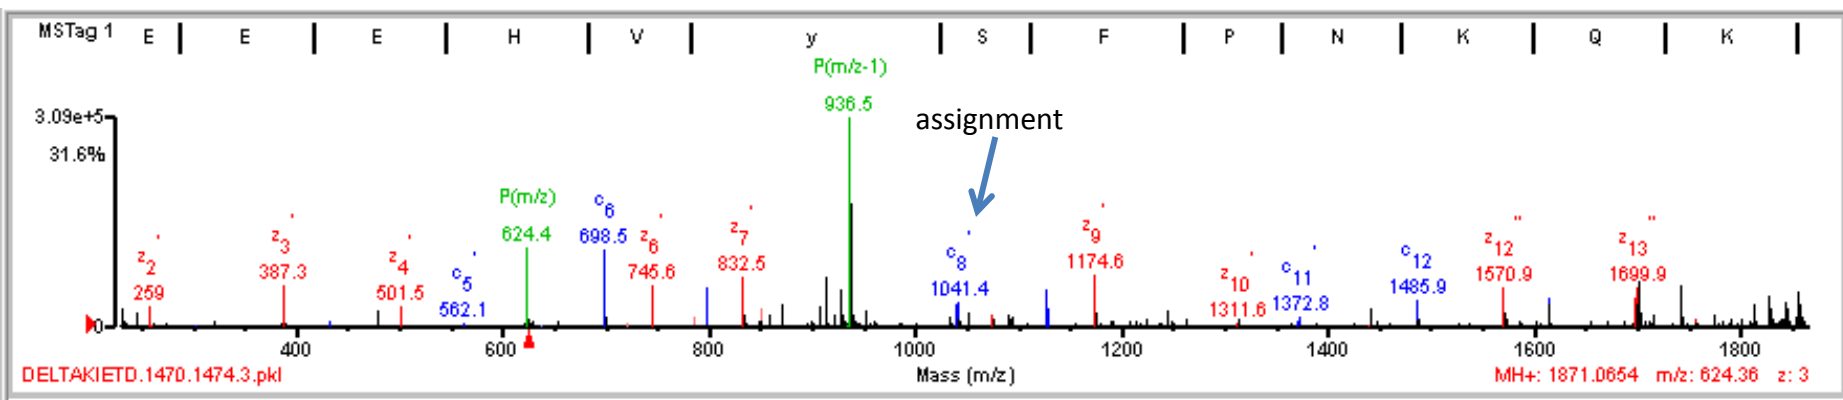

| Rank                    | Score  | SPI (%) | BCS    | # Unmatched Ions | Variable sites | Sequence                                            | MH* Calculated (Da) | MH* Error (Da) | MH* Error (ppm) | Protein MW/pl (Da) | Species      | Accession #             | MS-Digest Index #     | Protein Name |         |         |         |         |         |         |         |         |         |         |         |
|-------------------------|--------|---------|--------|------------------|----------------|-----------------------------------------------------|---------------------|----------------|-----------------|--------------------|--------------|-------------------------|-----------------------|--------------|---------|---------|---------|---------|---------|---------|---------|---------|---------|---------|---------|
| 1                       | 17.27  | 91.8    | 10     | 3/25             | Y118y          | (R) V G/E/E E H   V   Y   S   F P/N   K   Q   K (S) | 1790.87             | 80.1947        | 122.0           | 60936.9/5.92       | Homo sapiens | <a href="#">4506345</a> | <a href="#">37403</a> | paxillin     |         |         |         |         |         |         |         |         |         |         |         |
| Fragment-ion (m/z)      | 244.97 | 259.04  | 387.27 | 501.51           | 698.47         | 745.63                                              | 797.56              | 832.52         | 850.29          | 858.44             | 871.46       | 952.58                  | 1040.65               | 1075.47      | 1127.53 | 1174.59 | 1176.21 | 1485.89 | 1570.89 | 1614.13 | 1698.98 | 1699.87 | 1702.03 | 1741.88 | 1742.85 |
| Frac. Inten. (% of TIC) | 2.36   | 2.20    | 4.15   | 2.58             | 8.38           | 4.36                                                | 3.69                | 6.67           | 2.48            | 2.08               | 4.02         | 2.06                    | 4.34                  | 2.78         | 4.06    | 4.58    | 2.16    | 5.30    | 5.67    | 6.12    | 2.03    | 4.36    | 3.81    | 2.74    | 7.03    |
| Rel. Inten. (% of BP)   | 28.18  | 26.21   | 49.51  | 30.75            | 100.00         | 52.01                                               | 44.08               | 79.58          | 29.66           | 24.80              | 48.04        | 24.62                   | 51.82                 | 33.14        | 48.44   | 54.64   | 25.78   | 63.24   | 67.71   | 73.04   | 24.28   | 52.05   | 45.48   | 32.73   | 83.95   |
| Score                   | -0.28  | 1.00    | 1.00   | 1.00             | 1.00           | 1.00                                                | 1.00                | 1.00           | 1.00            | 0.25               | 1.00         | -0.25                   | 1.00                  | 1.00         | 1.00    | 1.00    | 0.25    | 1.00    | 0.25    | 1.00    | 1.00    | 0.25    | -0.45   | 1.00    | 0.25    |
| Ion-type                |        | y+++4   | z'3    | z'4              | c8             | z'6                                                 | c7                  | z'7            | z'+13           | y+++13             | c+++14       |                         | c8                    | z'8          | c9      | z'9     | z''9    | c12     | z''12   | c13     | z'13    | z''13   |         | c14     | c'14    |
| Delta Da                |        | -0.12   | 0.02   | 0.22             | 0.16           | 0.22                                                | 0.18                | 0.08           | 0.42            | 0.56               | 0.08         |                         | 0.24                  | -0.00        | 0.09    | 0.05    | 0.66    | 0.29    | 0.20    | 0.43    | 0.25    | 0.13    |         | 0.12    | 0.08    |





# Peak 225

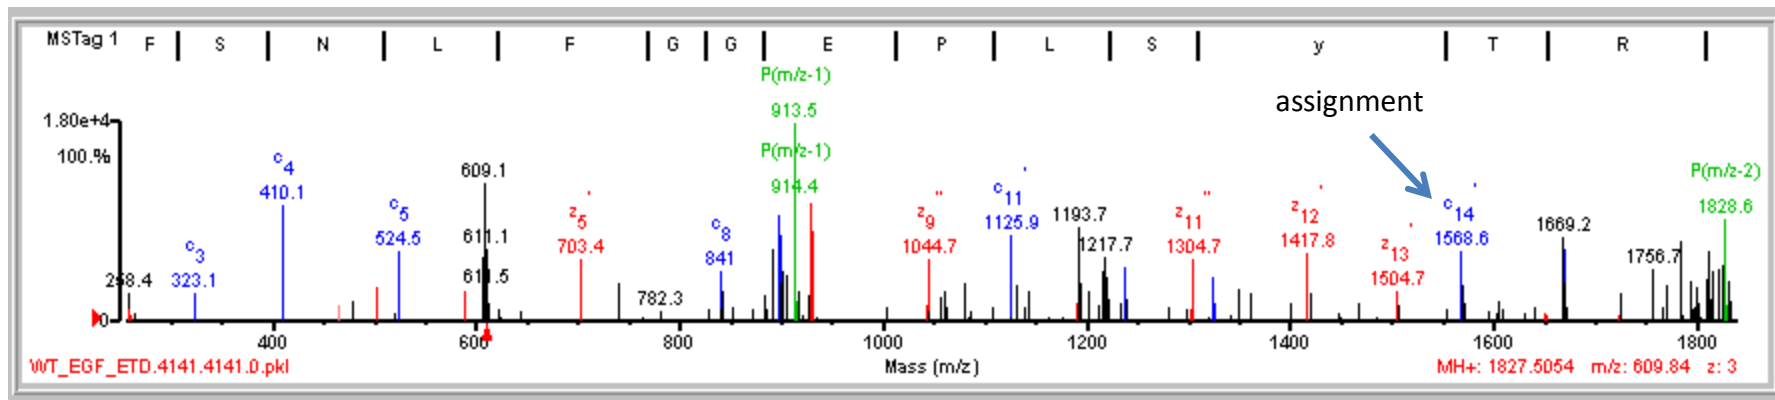

| Rank | Score | SPI (%) | BCS | # Unmatched Ions | Variable sites | Sequence                                | MH <sup>+</sup> Calculated (Da) | MH <sup>+</sup> Error (Da) | MH <sup>+</sup> Error (ppm) | Protein MW/pI (Da) | Species        | Accession #             | MS-Digest Index #     | Protein Name         |                 |         |         |                 |                 |                 |                 |                 |                 |                 |       |
|------|-------|---------|-----|------------------|----------------|-----------------------------------------|---------------------------------|----------------------------|-----------------------------|--------------------|----------------|-------------------------|-----------------------|----------------------|-----------------|---------|---------|-----------------|-----------------|-----------------|-----------------|-----------------|-----------------|-----------------|-------|
| 1    | 8.99  | 76.8    | 11  | 4/18             | Y20y           | (R) S A F/S N L F/G G/E P L\S\Y\T\R (F) | 1745.85                         | 81.6561                    | 924.6                       | 84901.8/6.18       | Homo sapiens   | <a href="#">4507457</a> | <a href="#">13195</a> | transferrin receptor |                 |         |         |                 |                 |                 |                 |                 |                 |                 |       |
|      |       |         |     |                  |                |                                         | 410.14                          | 524.47                     | 703.38                      | 840.96             | 892.16         | 929.69                  | 1044.74               | 1125.89              | 1193.67         | 1216.31 | 1219.76 | 1237.66         | 1304.72         | 1324.78         | 1417.80         | 1504.68         | 1568.55         | 1669.22         |       |
|      |       |         |     |                  |                |                                         | Frac. Inten. (% of TIC)         | 6.44                       | 3.93                        | 4.68               | 3.48           | 4.04                    | 11.57                 | 4.08                 | 5.10            | 7.84    | 6.81    | 4.53            | 5.80            | 3.42            | 3.57            | 3.78            | 3.51            | 5.87            | 11.54 |
|      |       |         |     |                  |                |                                         | Rel. Inten. (% of BP)           | 55.70                      | 33.99                       | 40.44              | 30.09          | 34.92                   | 100.00                | 35.29                | 44.13           | 67.76   | 58.85   | 39.17           | 50.10           | 29.56           | 30.84           | 32.71           | 30.33           | 50.78           | 99.76 |
|      |       |         |     |                  |                |                                         | Score                           | 1.00                       | 1.00                        | 1.00               | 1.00           | -0.35                   | 1.00                  | 0.25                 | 0.25            | -0.68   | -0.59   | -0.39           | 1.00            | 0.25            | 1.00            | 1.00            | 1.00            | 0.25            | 1.00  |
|      |       |         |     |                  |                |                                         | Ion-type                        | c <sub>4</sub>             | c <sub>5</sub>              | z <sub>5</sub>     | c <sub>8</sub> |                         | z <sub>7</sub>        | z <sub>9</sub>       | c <sub>11</sub> |         |         | c <sub>12</sub> | z <sub>11</sub> | c <sub>13</sub> | z <sub>12</sub> | z <sub>13</sub> | c <sub>14</sub> | c <sub>15</sub> |       |
|      |       |         |     |                  |                |                                         | Delta Da                        | -0.06                      | 0.22                        | 0.09               | -0.46          |                         | 0.30                  | 0.30                 | 0.35            |         |         | 0.04            | 0.13            | 0.13            | 0.17            | 0.02            | -0.14           | 0.49            |       |





# Peak 228

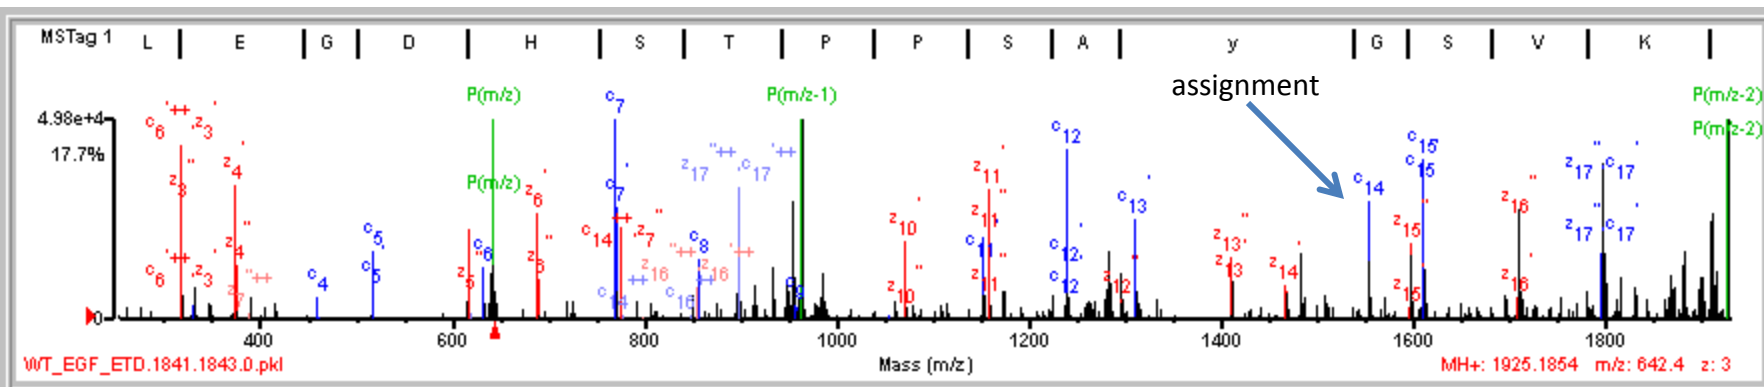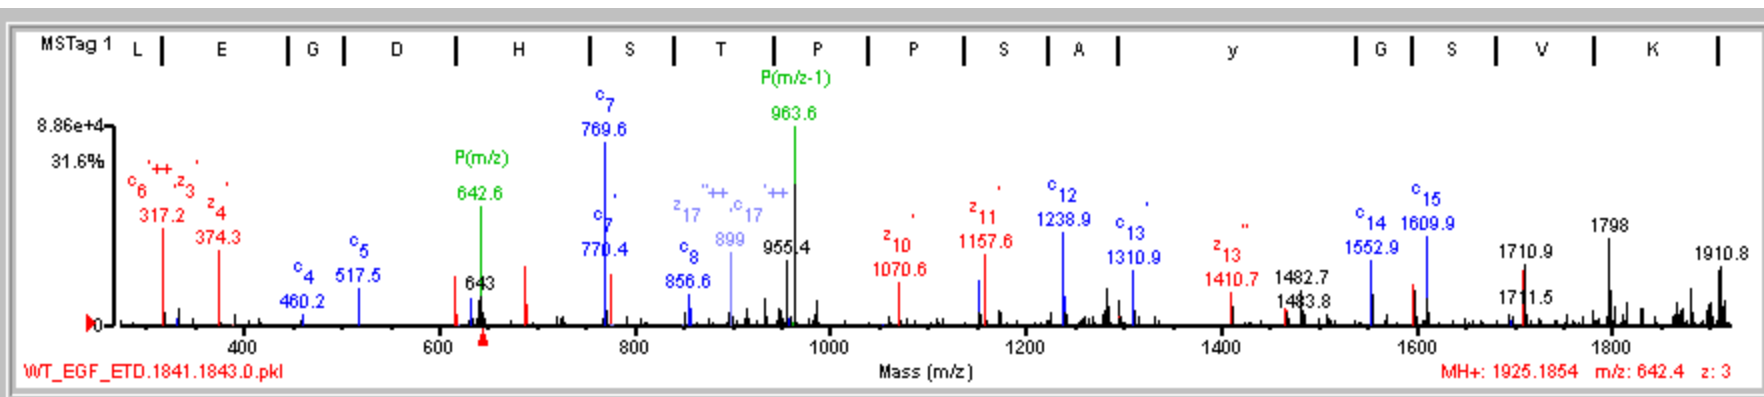

| Rank | Score | SPI (%) | BCS | # Unmatched Ions | Variable sites | Sequence                                    | MH <sup>+</sup> Calculated (Da) | MH <sup>+</sup> Error (Da) | MH <sup>+</sup> Error (ppm) | Protein MW/pI (Da) | Species      | Accession #              | MS-Digest Index #     | Protein Name         |
|------|-------|---------|-----|------------------|----------------|---------------------------------------------|---------------------------------|----------------------------|-----------------------------|--------------------|--------------|--------------------------|-----------------------|----------------------|
| 1    | 17.87 | 91.6    | 14  | 2/23             | Y24y           | (K) L/S/L/E/G/D/H/S/T P P S/A Y G/S V\K (A) | 1844.90                         | 80.2830                    | 164.5                       | 38604.2/7.58       | Homo sapiens | <a href="#">4757756</a>  | <a href="#">3802</a>  | annexin A2 isoform 2 |
| 1    | 17.87 | 91.6    | 14  | 2/23             | Y42y           | (K) L/S/L/E/G/D/H/S/T P P S/A Y G/S V\K (A) | 1844.90                         | 80.2830                    | 164.5                       | 40411.4/8.53       | Homo sapiens | <a href="#">50845388</a> | <a href="#">12086</a> | annexin A2 isoform 1 |
| 1    | 17.87 | 91.6    | 14  | 2/23             | Y24y           | (K) L/S/L/E/G/D/H/S/T P P S/A Y G/S V\K (A) | 1844.90                         | 80.2830                    | 164.5                       | 38604.2/7.58       | Homo sapiens | <a href="#">50845386</a> | <a href="#">17586</a> | annexin A2 isoform 2 |

| Fragment-ion (m/z)     | 317.19           | 374.29         | 517.53         | 617.30         | 688.45         | 769.56         | 775.50         | 856.56         | 898.98            | 1070.62         | 1151.70         | 1157.64         | 1238.88         | 1282.74         | 1295.04         | 1309.84         | 1482.68         | 1552.91         | 1596.81         | 1609.87         | 1710.08         | 1796.50         | 1798.05 |
|------------------------|------------------|----------------|----------------|----------------|----------------|----------------|----------------|----------------|-------------------|-----------------|-----------------|-----------------|-----------------|-----------------|-----------------|-----------------|-----------------|-----------------|-----------------|-----------------|-----------------|-----------------|---------|
| Frac. Inten.(% of TIC) | 7.13             | 3.90           | 2.02           | 2.54           | 2.97           | 9.50           | 3.34           | 1.98           | 3.07              | 2.23            | 3.83            | 5.15            | 6.27            | 2.08            | 2.08            | 4.33            | 2.78            | 6.65            | 3.77            | 9.21            | 4.83            | 4.05            | 6.27    |
| Rel. Inten.(% of BP)   | 75.06            | 41.08          | 21.23          | 26.73          | 31.25          | 100.00         | 35.15          | 20.87          | 32.36             | 23.49           | 40.33           | 54.18           | 66.02           | 21.94           | 21.84           | 45.52           | 29.28           | 69.97           | 39.70           | 96.90           | 50.87           | 42.64           | 66.03   |
| Score                  | 1.00             | 1.00           | 1.00           | 1.00           | 1.00           | 1.00           | 1.00           | 1.00           | 1.00              | 1.00            | 1.00            | 1.00            | 1.00            | -0.22           | 1.00            | 1.00            | 0.25            | 1.00            | 0.25            | 1.00            | 0.25            | 1.00            | -0.66   |
| Ion-type               | y <sup>++5</sup> | z <sup>4</sup> | c <sub>5</sub> | z <sub>5</sub> | z <sub>6</sub> | c <sub>7</sub> | z <sub>7</sub> | c <sub>8</sub> | c <sup>++17</sup> | z <sub>10</sub> | c <sub>11</sub> | z <sub>11</sub> | c <sub>12</sub> | z <sub>12</sub> | c <sub>13</sub> | y <sub>14</sub> | c <sub>14</sub> | z <sup>15</sup> | c <sub>15</sub> | z <sup>16</sup> | c <sub>17</sub> | z <sup>17</sup> |         |
| Delta Da               | 0.05             | 0.07           | 0.23           | 0.05           | 0.17           | 0.18           | 0.19           | 0.14           | 0.58              | 0.15            | 0.13            | 0.14            | 0.28            |                 | 0.48            | 0.20            | 0.05            | 0.24            | 0.15            | 0.18            | 0.34            | 0.71            | 0.73    |
|                        |                  |                |                |                |                |                |                |                | 0.59              |                 |                 |                 |                 |                 |                 | -0.74           |                 |                 |                 |                 |                 |                 |         |



# Peak 229

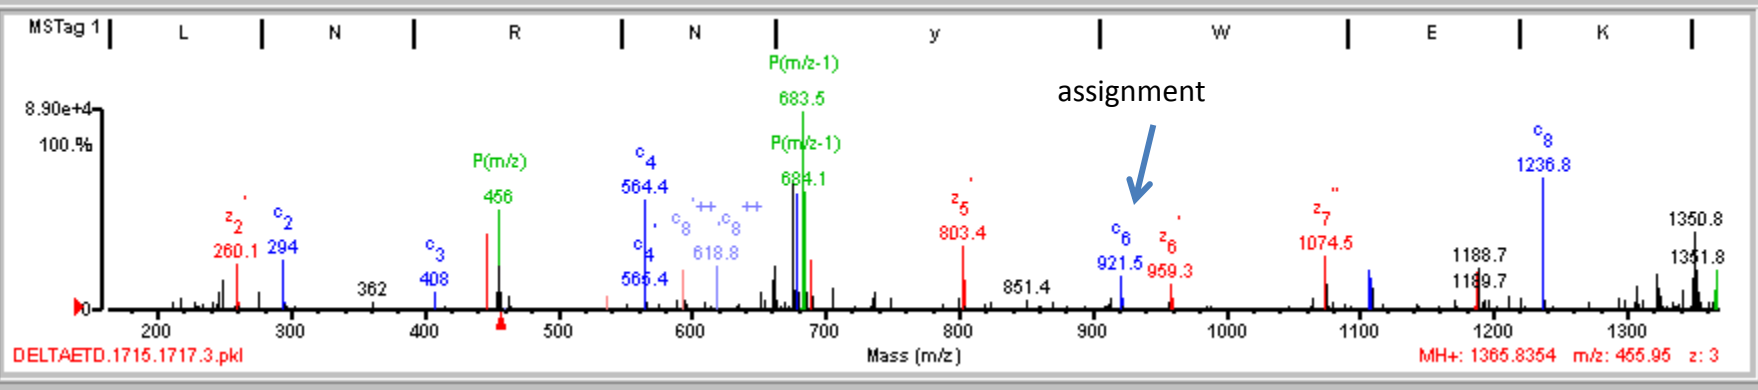

| Rank                    | Score  | SPI (%) | BCS            | # Unmatched Ions | Variable sites | Sequence                  | MH <sup>+</sup> Calculated (Da) | MH <sup>+</sup> Error (Da) | MH <sup>+</sup> Error (ppm) | Protein MW/pl (Da) | Species        | Accession #             | MS-Digest Index #     | Protein Name                                                 |                |                |                |         |         |         |         |         |
|-------------------------|--------|---------|----------------|------------------|----------------|---------------------------|---------------------------------|----------------------------|-----------------------------|--------------------|----------------|-------------------------|-----------------------|--------------------------------------------------------------|----------------|----------------|----------------|---------|---------|---------|---------|---------|
| 1                       | 14.47  | 92.6    | 8              | 4/22             | Y334y          | (R) Y/L N R N/y W E\R (K) | 1285.63                         | 80.2031                    | 173.3                       | 86192.5/5.84       | Homo sapiens   | <a href="#">4758528</a> | <a href="#">25714</a> | hepatocyte growth factor-regulated tyrosine kinase substrate |                |                |                |         |         |         |         |         |
| Fragment-ion (m/z)      | 246.90 | 248.70  | 260.11         | 276.17           | 293.99         | 408.05                    | 446.19                          | 564.44                     | 594.05                      | 618.82             | 661.32         | 689.23                  | 705.39                | 803.37                                                       | 921.50         | 959.31         | 1073.73        | 1074.47 | 1107.63 | 1187.69 | 1192.72 | 1236.75 |
| Frac. Inten. (% of TIC) | 1.31   | 2.58    | 4.11           | 1.37             | 4.52           | 1.31                      | 6.11                            | 9.51                       | 4.21                        | 3.23               | 2.02           | 6.02                    | 1.52                  | 6.77                                                         | 4.00           | 3.55           | 2.55           | 5.82    | 7.46    | 6.77    | 1.45    | 13.80   |
| Rel. Inten. (% of BP)   | 9.51   | 18.67   | 29.78          | 9.92             | 32.73          | 9.48                      | 44.28                           | 68.87                      | 30.49                       | 23.39              | 14.64          | 43.63                   | 11.01                 | 49.05                                                        | 28.96          | 25.72          | 18.49          | 42.19   | 54.07   | 49.06   | 10.52   | 100.00  |
| Score                   | -0.10  | -0.19   | 1.00           | 0.25             | 1.00           | 1.00                      | 1.00                            | 1.00                       | 1.00                        | 1.00               | -0.15          | 1.00                    | 0.25                  | 1.00                                                         | 1.00           | 1.00           | 1.00           | 0.25    | 1.00    | 0.25    | -0.11   | 1.00    |
| Ion-type                |        |         | z <sub>2</sub> | y <sub>2</sub>   | c <sub>2</sub> | c <sub>3</sub>            | z <sub>3</sub>                  | c <sub>4</sub>             | z <sub>4</sub>              | c <sub>5</sub>     | z <sub>5</sub> | c <sub>6</sub>          | z <sub>6</sub>        | c <sub>7</sub>                                               | z <sub>7</sub> | c <sub>8</sub> | z <sub>8</sub> |         |         |         |         |         |
| Delta Da                |        |         | -0.03          | 0.01             | -0.19          | -0.17                     | -0.03                           | 0.11                       | 0.29                        | 0.06               | -0.02          | 0.13                    | 0.08                  | 0.10                                                         | -0.08          | 0.30           | 0.03           | 0.03    | 0.15    | 0.17    |         | 0.23    |

# Peak 230

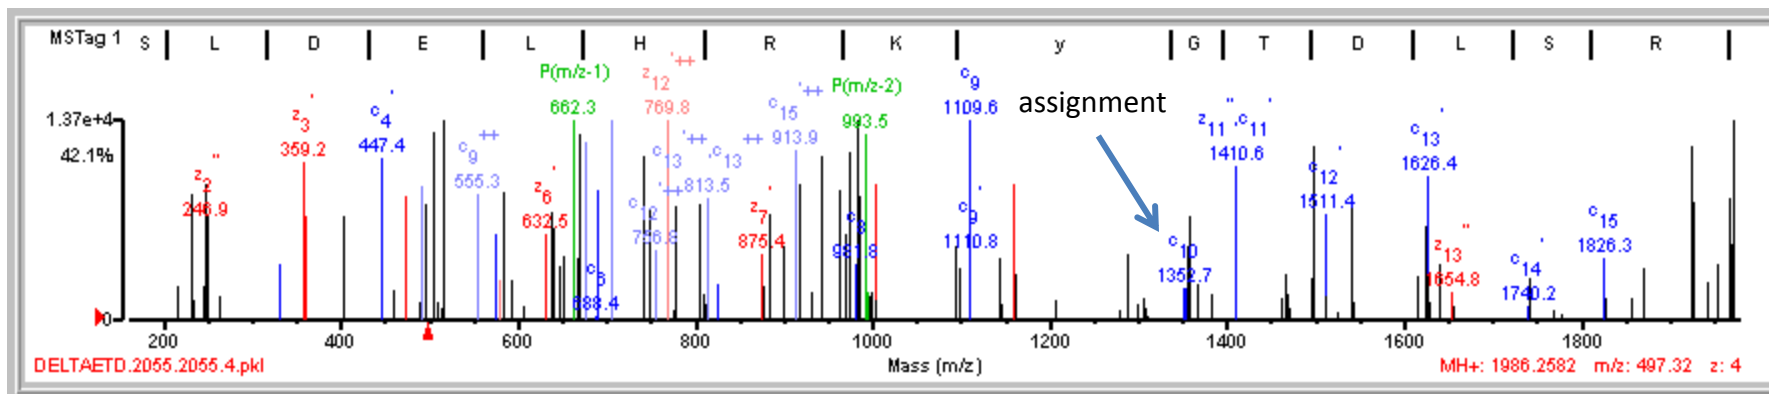

## Detailed Results

| Rank | Score | SPI (%) | BCS | # Unmatched Ions | Variable sites | Sequence                                                      | MH <sup>+</sup> Calculated (Da) | MH <sup>+</sup> Error (Da) | MH <sup>+</sup> Error (ppm) | Protein MW/pl (Da) | Species      | Accession #              | MS-Digest Index #     | Protein Name                                        |
|------|-------|---------|-----|------------------|----------------|---------------------------------------------------------------|---------------------------------|----------------------------|-----------------------------|--------------------|--------------|--------------------------|-----------------------|-----------------------------------------------------|
| 1    | 9.62  | 70.2    | 11  | 8/25             | Y55y           | (K) L S L D   E / L H / R   K   Y \ G \ T \ D   L / S \ R (G) | 1903.00                         | 83.2550                    | 1655.7                      | 74167.3/5.73       | Homo sapiens | <a href="#">48762682</a> | <a href="#">27732</a> | Na+/K+ -ATPase alpha 1 subunit isoform b proprotein |
| 1    | 9.62  | 70.2    | 11  | 8/25             | Y55y           | (K) L S L D   E / L H / R   K   Y \ G \ T \ D   L / S \ R (G) | 1903.00                         | 83.2550                    | 1655.7                      | 112896.8/5.33      | Homo sapiens | <a href="#">21361181</a> | <a href="#">30493</a> | Na+/K+ -ATPase alpha 1 subunit isoform a proprotein |

  

| Fragment-ion (m/z)      | 247.88         | 359.24         | 447.38         | 491.36         | 504.25            | 516.15 | 631.32 | 670.44 | 676.71          | 705.65          | 743.45 | 748.56 | 769.84          | 813.48          | 875.43         | 913.91          | 918.84 | 942.36 | 1003.39        | 1109.62        | 1159.34        | 1410.64         | 1498.25         | 1540.48         | 1626.45         |
|-------------------------|----------------|----------------|----------------|----------------|-------------------|--------|--------|--------|-----------------|-----------------|--------|--------|-----------------|-----------------|----------------|-----------------|--------|--------|----------------|----------------|----------------|-----------------|-----------------|-----------------|-----------------|
| Frac. Inten. (% of TIC) | 5.60           | 5.60           | 3.44           | 2.87           | 4.03              | 5.31   | 3.45   | 3.95   | 3.79            | 4.35            | 3.49   | 2.95   | 5.65            | 4.03            | 3.50           | 3.62            | 2.90   | 3.48   | 2.89           | 6.82           | 2.92           | 3.30            | 4.30            | 3.75            | 4.02            |
| Rel. Inten. (% of BP)   | 82.09          | 82.13          | 50.47          | 42.05          | 59.14             | 77.95  | 50.55  | 57.98  | 55.56           | 63.85           | 51.24  | 43.26  | 82.95           | 59.12           | 51.32          | 53.04           | 42.59  | 51.10  | 42.44          | 100.00         | 42.84          | 48.34           | 63.15           | 54.97           | 58.96           |
| Score                   | 0.25           | 1.00           | 0.25           | 1.00           | 1.00              | -0.78  | -0.51  | -0.58  | 1.00            | 1.00            | -0.51  | -0.43  | 1.00            | 1.00            | 1.00           | 1.00            | -0.43  | -0.51  | 1.00           | 1.00           | 1.00           | 0.25            | -0.63           | 0.25            | 1.00            |
| Ion-type                | z <sub>2</sub> | z <sub>3</sub> | c <sub>4</sub> | c <sub>8</sub> | c <sub>3+12</sub> |        |        |        | c <sub>10</sub> | c <sub>11</sub> |        |        | z <sub>12</sub> | c <sub>13</sub> | z <sub>7</sub> | c <sub>15</sub> |        |        | z <sub>8</sub> | c <sub>9</sub> | z <sub>9</sub> | c <sub>11</sub> | z <sub>11</sub> | z <sub>12</sub> | c <sub>13</sub> |
| Delta Da                | 0.74           | 0.02           | 0.11           | 0.08           | -0.00             |        |        |        | -0.13           | 0.30            |        |        | -0.03           | 0.09            | 0.09           | 0.46            |        |        | -0.05          | -0.02          | -0.20          | -0.06           |                 | 0.75            | 0.68            |

# Peak 231

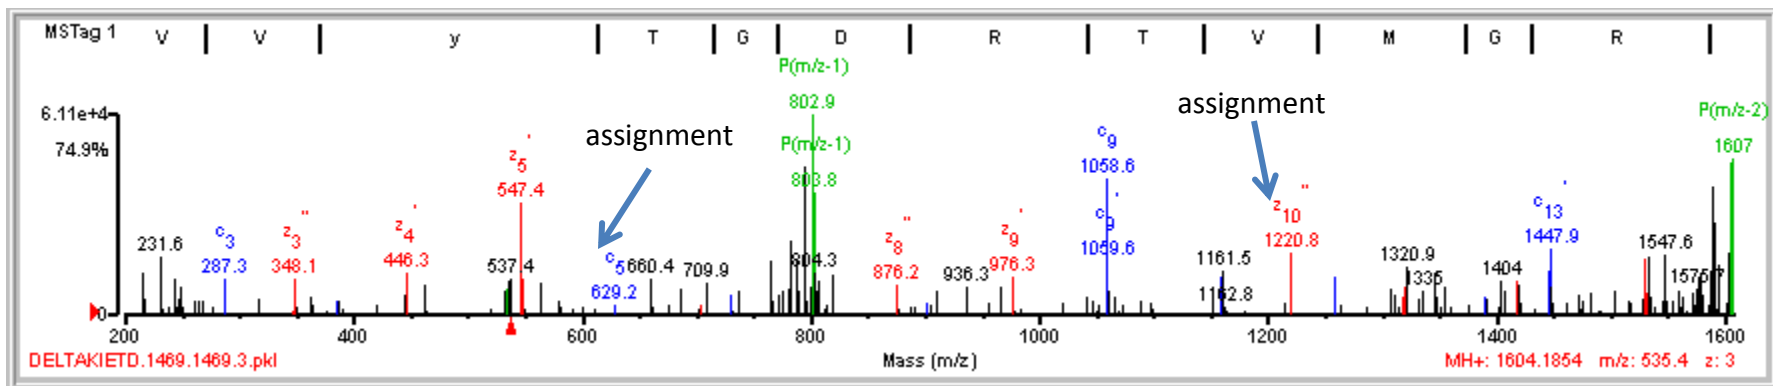

| Rank                    | Score  | SPI (%)    | BCS    | # Unmatched Ions | Variable sites | Sequence                             | MH* Calculated (Da) | MH* Error (Da) | MH* Error (ppm) | Protein MW/pl (Da) | Species      | Accession #              | MS-Digest Index #     | Protein Name                                        |            |          |           |         |         |            |          |           |           |         |         |
|-------------------------|--------|------------|--------|------------------|----------------|--------------------------------------|---------------------|----------------|-----------------|--------------------|--------------|--------------------------|-----------------------|-----------------------------------------------------|------------|----------|-----------|---------|---------|------------|----------|-----------|-----------|---------|---------|
| 1                       | 12.27  | 76.0       | 11     | 7/25             | Y260y          | (R)G/I/V/V/Y/T/G D R I T V\M/G\R (I) | 1523.80             | 80.3856        | 261.3           | 74167.3/5.73       | Homo sapiens | <a href="#">48762682</a> | <a href="#">27732</a> | Na+/K+ -ATPase alpha 1 subunit isoform b proprotein |            |          |           |         |         |            |          |           |           |         |         |
| 1                       | 12.27  | 76.0       | 11     | 7/25             | Y260y          | (R)G/I/V/V/Y/T/G D R I T V\M/G\R (I) | 1523.80             | 80.3856        | 261.3           | 112896.8/5.33      | Homo sapiens | <a href="#">21361181</a> | <a href="#">30493</a> | Na+/K+ -ATPase alpha 1 subunit isoform a proprotein |            |          |           |         |         |            |          |           |           |         |         |
| Fragment-ion (m/z)      | 215.45 | 231.56     | 244.74 | 248.67           | 287.27         | 446.26                               | 547.35              | 660.45         | 765.80          | 820.44             | 876.17       | 976.34                   | 1058.62               | 1160.43                                             | 1220.84    | 1258.78  | 1318.99   | 1320.90 | 1345.67 | 1403.98    | 1418.71  | 1446.71   | 1447.87   | 1530.72 | 1533.45 |
| Frac. Inten. (% of TIC) | 2.29   | 3.24       | 2.50   | 2.30             | 2.65           | 3.67                                 | 8.23                | 2.66           | 3.35            | 2.21               | 2.09         | 3.83                     | 12.12                 | 5.61                                                | 3.65       | 2.14     | 2.57      | 3.51    | 5.48    | 2.67       | 4.92     | 2.45      | 6.18      | 4.31    | 5.35    |
| Rel. Inten. (% of BP)   | 18.94  | 26.76      | 20.66  | 18.97            | 21.91          | 30.32                                | 67.92               | 21.93          | 27.65           | 18.25              | 17.26        | 31.64                    | 100.00                | 46.34                                               | 30.08      | 17.69    | 21.17     | 28.98   | 45.23   | 22.00      | 40.63    | 20.26     | 51.00     | 35.54   | 44.16   |
| Score                   | 1.00   | 0.25       | -0.21  | -0.19            | 1.00           | 1.00                                 | 1.00                | 1.00           | 1.00            | -0.18              | 1.00         | 1.00                     | 1.00                  | 0.25                                                | 0.25       | 1.00     | 1.00      | -0.29   | -0.45   | -0.22      | 0.25     | 1.00      | 0.25      | 1.00    | -0.44   |
| Ion-type                | $z'_2$ | $y_2$      |        |                  | $c_3$          | $y^{++}_8$                           | $z'_5$              | $z^{+++}_{11}$ | $z^{+++}_{13}$  |                    | $z'_8$       | $z'_9$                   | $c_9$                 | $c'_{10}$                                           | $z''_{10}$ | $c_{11}$ | $z'_{11}$ |         |         | $z''_{12}$ | $c_{13}$ | $c'_{13}$ | $z'_{13}$ |         |         |
| Delta Da                | -0.67  | $y^{++}_4$ |        |                  | 0.06           | 0.03                                 | 0.07                | 0.66           | -0.07           |                    | 0.74         | -0.14                    | 0.12                  | -0.13                                               | 0.33       | 0.16     | 0.42      |         |         | 0.06       | 0.03     | 0.18      | -0.01     |         |         |

# Peak 232

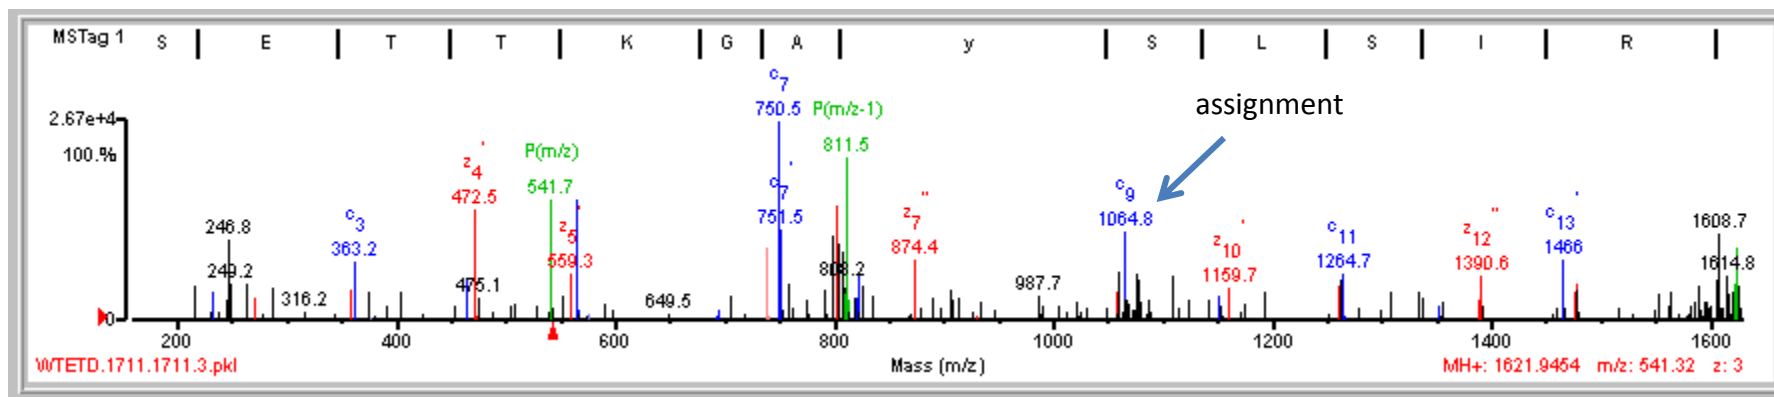

| Rank | Score | SPI (%) | BCS | # Unmatched Ions | Variable sites | Sequence                            | MH <sup>+</sup> Calculated (Da) | MH <sup>+</sup> Error (Da) | MH <sup>+</sup> Error (ppm) | Protein MW/pl (Da) | Species      | Accession #               | MS-Digest Index #     | Protein Name                               |
|------|-------|---------|-----|------------------|----------------|-------------------------------------|---------------------------------|----------------------------|-----------------------------|--------------------|--------------|---------------------------|-----------------------|--------------------------------------------|
| 1    | 12.60 | 78.9    | 11  | 7/24             | Y194y          | (R) E/S/E T\T K G A\Y S/L\S I\R (D) | 1541.78                         | 80.1649                    | 122.4                       | 60801.6/6.32       | Homo sapiens | <a href="#">4885661</a>   | <a href="#">2097</a>  | viral oncogene yes-1 homolog 1             |
| 1    | 12.60 | 78.9    | 11  | 7/24             | Y180y          | (R) E/S/E T\T K G A\Y S/L\S I\R (D) | 1541.78                         | 80.1649                    | 122.4                       | 59479.0/5.41       | Homo sapiens | <a href="#">112382241</a> | <a href="#">7861</a>  | proto-oncogene tyrosine-protein kinase FGR |
| 1    | 12.60 | 78.9    | 11  | 7/24             | Y185y          | (R) E/S/E T\T K G A\Y S/L\S I\R (D) | 1541.78                         | 80.1649                    | 122.4                       | 54513.8/5.86       | Homo sapiens | <a href="#">23510364</a>  | <a href="#">18851</a> | protein-tyrosine kinase fyn isoform c      |
| 1    | 12.60 | 78.9    | 11  | 7/24             | Y185y          | (R) E/S/E T\T K G A\Y S/L\S I\R (D) | 1541.78                         | 80.1649                    | 122.4                       | 60762.2/6.23       | Homo sapiens | <a href="#">4503823</a>   | <a href="#">19185</a> | protein-tyrosine kinase fyn isoform a      |
| 1    | 12.60 | 78.9    | 11  | 7/24             | Y180y          | (R) E/S/E T\T K G A\Y S/L\S I\R (D) | 1541.78                         | 80.1649                    | 122.4                       | 59479.0/5.41       | Homo sapiens | <a href="#">4885235</a>   | <a href="#">29858</a> | proto-oncogene tyrosine-protein kinase FGR |
| 1    | 12.60 | 78.9    | 11  | 7/24             | Y180y          | (R) E/S/E T\T K G A\Y S/L\S I\R (D) | 1541.78                         | 80.1649                    | 122.4                       | 59479.0/5.41       | Homo sapiens | <a href="#">112382244</a> | <a href="#">31203</a> | proto-oncogene tyrosine-protein kinase FGR |
| 1    | 12.60 | 78.9    | 11  | 7/24             | Y185y          | (R) E/S/E T\T K G A\Y S/L\S I\R (D) | 1541.78                         | 80.1649                    | 122.4                       | 60141.3/5.87       | Homo sapiens | <a href="#">23510362</a>  | <a href="#">32449</a> | protein-tyrosine kinase fyn isoform b      |

| Fragment-ion (m/z)     | 246.76 | 264.69 | 363.22         | 464.16         | 472.46          | 559.29          | 565.26         | 739.27                         | 750.47         | 758.73 | 822.38          | 873.48          | 907.02 | 1058.65         | 1060.38 | 1064.75        | 1077.46 | 1109.26 | 1261.69           | 1264.69         | 1390.62           | 1464.89         | 1465.39         | 1477.76           |
|------------------------|--------|--------|----------------|----------------|-----------------|-----------------|----------------|--------------------------------|----------------|--------|-----------------|-----------------|--------|-----------------|---------|----------------|---------|---------|-------------------|-----------------|-------------------|-----------------|-----------------|-------------------|
| Frac. Inten.(% of TIC) | 4.02   | 1.87   | 3.06           | 2.13           | 5.77            | 2.33            | 7.03           | 3.94                           | 15.12          | 3.26   | 2.86            | 5.92            | 2.62   | 1.86            | 2.55    | 7.57           | 4.50    | 2.28    | 3.86              | 2.88            | 2.28              | 2.43            | 5.78            | 4.06              |
| Rel. Inten.(% of BP)   | 26.58  | 12.38  | 20.23          | 14.12          | 38.16           | 15.40           | 46.54          | 26.07                          | 100.00         | 21.55  | 18.94           | 39.17           | 17.35  | 12.30           | 16.88   | 50.10          | 29.77   | 15.10   | 25.53             | 19.08           | 15.09             | 16.07           | 38.25           | 26.85             |
| Score                  | -0.27  | -0.12  | 1.00           | 1.00           | 1.00            | 1.00            | 1.00           | 1.00                           | 1.00           | -0.22  | 0.25            | 1.00            | -0.17  | 1.00            | -0.17   | 1.00           | -0.30   | -0.15   | 0.25              | 1.00            | 0.25              | 1.00            | 1.00            | 0.25              |
| Ion-type               |        |        | c <sub>3</sub> | c <sub>4</sub> | z' <sub>4</sub> | z' <sub>5</sub> | c <sub>5</sub> | z <sup>+++</sup> <sub>13</sub> | c <sub>7</sub> |        | c' <sub>8</sub> | z' <sub>7</sub> |        | z' <sub>9</sub> |         | c <sub>9</sub> |         |         | z'' <sub>11</sub> | c <sub>11</sub> | z'' <sub>12</sub> | c <sub>13</sub> | c <sub>13</sub> | z'' <sub>13</sub> |
| Delta Da               |        |        | 0.07           | -0.04          | 0.16            | -0.04           | 0.01           | 0.42                           | 0.11           |        | -0.03           | 0.08            |        | 0.13            |         | 0.32           |         |         | 0.07              | 0.14            | -0.04             | 0.23            | 0.73            | 0.07              |



# Peak 234

Ions that verify assignment

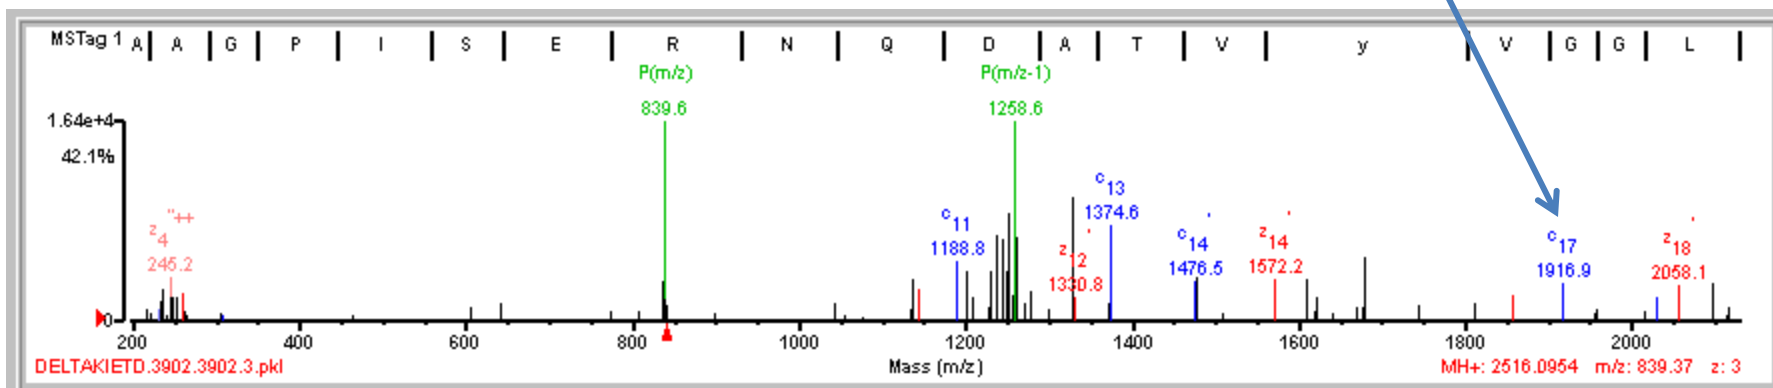

| Rank | Score | SPI (%) | BCS | # Unmatched Ions | Variable sites | Sequence                                              | MH <sup>+</sup> Calculated (Da) | MH <sup>+</sup> Error (Da) | MH <sup>+</sup> Error (ppm)   | Protein MW/pl (Da) | Species      | Accession #                 | MS-Digest Index #            | Protein Name                  |         |         |         |                              |                 |                 |                              |         |         |                              |                 |                 |                              |         |         |         |       |
|------|-------|---------|-----|------------------|----------------|-------------------------------------------------------|---------------------------------|----------------------------|-------------------------------|--------------------|--------------|-----------------------------|------------------------------|-------------------------------|---------|---------|---------|------------------------------|-----------------|-----------------|------------------------------|---------|---------|------------------------------|-----------------|-----------------|------------------------------|---------|---------|---------|-------|
| 1    | 7.81  | 55.0    | 10  | 11/24            | M1m Y16y       | (-)m A\A G P/I S/E R/N Q/D A T\ V Y V\G G L D/E K (V) | 2421.17                         | 94.9240                    | -412.3                        | 44386.0/8.55       | Homo sapiens | <a href="#">5032069</a>     | <a href="#">31597</a>        | splicing factor 3b, subunit 4 |         |         |         |                              |                 |                 |                              |         |         |                              |                 |                 |                              |         |         |         |       |
|      |       |         |     |                  |                |                                                       | 235.44                          | 245.24                     | 246.86                        | 253.90             | 260.10       | 1137.76                     | 1145.24                      | 1188.84                       | 1202.24 | 1279.31 | 1328.99 | 1330.85                      | 1374.57         | 1476.53         | 1572.25                      | 1610.88 | 1621.20 | 1680.65                      | 1857.71         | 1916.92         | 2031.53                      | 2058.07 | 2096.84 | 2169.90 |       |
|      |       |         |     |                  |                |                                                       | Frac. Inten.(% of TIC)          | 2.74                       | 4.76                          | 4.65               | 2.07         | 2.38                        | 3.59                         | 2.74                          | 10.00   | 4.08    | 2.50    | 10.14                        | 2.05            | 7.97            | 8.36                         | 3.50    | 3.48    | 2.09                         | 5.37            | 2.20            | 3.15                         | 2.08    | 3.05    | 3.13    | 3.92  |
|      |       |         |     |                  |                |                                                       | Rel. Inten.(% of BP)            | 27.02                      | 46.95                         | 45.92              | 20.44        | 23.50                       | 35.40                        | 27.03                         | 98.64   | 40.30   | 24.62   | 100.00                       | 20.23           | 78.58           | 82.52                        | 34.50   | 34.29   | 20.61                        | 52.96           | 21.72           | 31.07                        | 20.54   | 30.11   | 30.90   | 38.70 |
|      |       |         |     |                  |                |                                                       | Score                           | 1.00                       | 1.00                          | -0.46              | -0.20        | 1.00                        | -0.35                        | 1.00                          | -0.40   | -0.25   | -1.00   | 1.00                         | 1.00            | 0.25            | 1.00                         | -0.34   | -0.21   | -0.53                        | 1.00            | 1.00            | 1.00                         | 1.00    | -0.31   | -0.39   |       |
|      |       |         |     |                  |                |                                                       | Ion-type                        | c <sub>2</sub>             | z <sup>+++</sup> <sub>4</sub> |                    |              | z <sup>'</sup> <sub>2</sub> | z <sup>'</sup> <sub>10</sub> | c <sub>11</sub>               |         |         |         | z <sup>'</sup> <sub>12</sub> | c <sub>13</sub> | c <sub>14</sub> | z <sup>'</sup> <sub>14</sub> |         |         | z <sup>'</sup> <sub>16</sub> | c <sub>17</sub> | c <sub>19</sub> | z <sup>'</sup> <sub>18</sub> |         |         |         |       |
|      |       |         |     |                  |                |                                                       | Delta Da                        | -0.67                      | 0.61                          |                    |              | -0.04                       |                              | 0.74                          | 0.26    |         |         | 0.28                         | -0.07           | -0.17           | -0.42                        |         |         | -0.10                        | 0.06            | 0.63            | 0.14                         |         |         |         |       |

# Peak 235

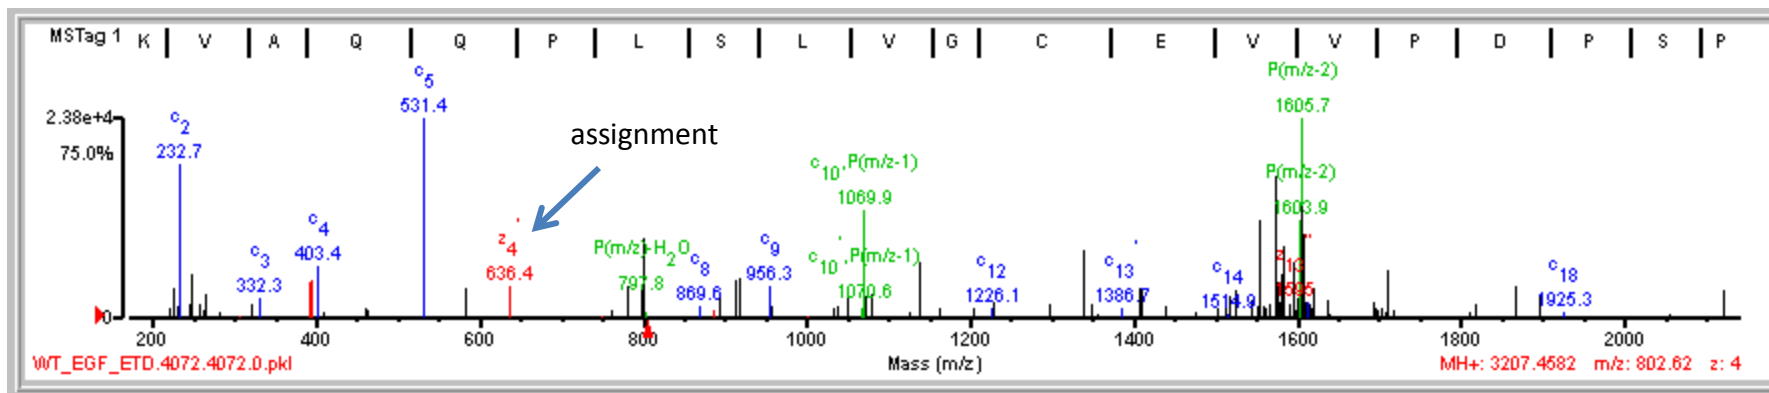

| Rank | Score | SPI (%) | BCS | # Unmatched Ions | Variable sites | Sequence                                                          | MH <sup>+</sup> Calculated (Da) | MH <sup>+</sup> Error (Da) | MH <sup>+</sup> Error (ppm) | Protein MW/pl (Da) | Species      | Accession #              | MS-Digest Index #     | Protein Name               |
|------|-------|---------|-----|------------------|----------------|-------------------------------------------------------------------|---------------------------------|----------------------------|-----------------------------|--------------------|--------------|--------------------------|-----------------------|----------------------------|
| 1    | 8.53  | 67.8    | 9   | 9/21             | Y413y          | (R) S K V A Q Q P L S L V G C E V V P D P S P D H L Y I S F R (I) | 3125.57                         | 81.8857                    | 598.4                       | 91300.1/5.21       | Homo sapiens | <a href="#">50897850</a> | <a href="#">16304</a> | KIAA1914 protein isoform 1 |
| 1    | 8.53  | 67.8    | 9   | 9/21             | Y413y          | (R) S K V A Q Q P L S L V G C E V V P D P S P D H L Y I S F R (I) | 3125.57                         | 81.8857                    | 598.4                       | 90860.6/5.19       | Homo sapiens | <a href="#">24308338</a> | <a href="#">20496</a> | KIAA1914 protein isoform 2 |

| Fragment-ion (m/z)      | 232.73         | 249.03 | 393.43         | 403.36         | 531.38         | 584.24                        | 636.45         | 781.04 | 912.51                         | 919.52                        | 956.34         | 1138.24 | 1339.01                       | 1408.51                       | 1524.64                       | 1553.91 | 1581.77 | 1608.76 | 1616.49 | 1710.80 | 1867.93 |
|-------------------------|----------------|--------|----------------|----------------|----------------|-------------------------------|----------------|--------|--------------------------------|-------------------------------|----------------|---------|-------------------------------|-------------------------------|-------------------------------|---------|---------|---------|---------|---------|---------|
| Frac. Inten. (% of TIC) | 9.48           | 2.81   | 5.05           | 3.20           | 26.35          | 1.91                          | 2.02           | 2.07   | 2.40                           | 2.52                          | 2.01           | 3.48    | 6.24                          | 3.76                          | 2.80                          | 6.16    | 7.23    | 3.02    | 2.50    | 2.98    | 1.98    |
| Rel. Inten. (% of BP)   | 35.99          | 10.66  | 19.17          | 12.13          | 100.00         | 7.24                          | 7.68           | 7.85   | 9.11                           | 9.58                          | 7.65           | 13.23   | 23.69                         | 14.28                         | 10.64                         | 23.37   | 27.46   | 11.48   | 9.50    | 11.29   | 7.53    |
| Score                   | 1.00           | -0.11  | 1.00           | 1.00           | 1.00           | 1.00                          | 1.00           | -0.08  | 0.25                           | 0.25                          | 1.00           | -0.13   | 1.00                          | 0.25                          | 1.00                          | -0.23   | -0.27   | -0.11   | -0.10   | -0.11   | -0.08   |
| Ion-type                | c <sub>2</sub> |        | z <sub>3</sub> | c <sub>4</sub> | c <sub>5</sub> | c <sup>++</sup> <sub>11</sub> | z <sub>4</sub> |        | z <sup>+++</sup> <sub>15</sub> | y <sup>++</sup> <sub>15</sub> | c <sub>9</sub> |         | z <sup>++</sup> <sub>23</sub> | c <sup>++</sup> <sub>25</sub> | c <sup>++</sup> <sub>27</sub> |         |         |         |         |         |         |
| Delta Da                | -0.43          |        | 0.23           | 0.09           | 0.06           | -0.62                         | 0.22           |        | 0.60                           | 0.11                          | -0.21          |         | 0.39                          | 0.33                          | -0.09                         |         |         |         |         |         |         |

# Peak 236

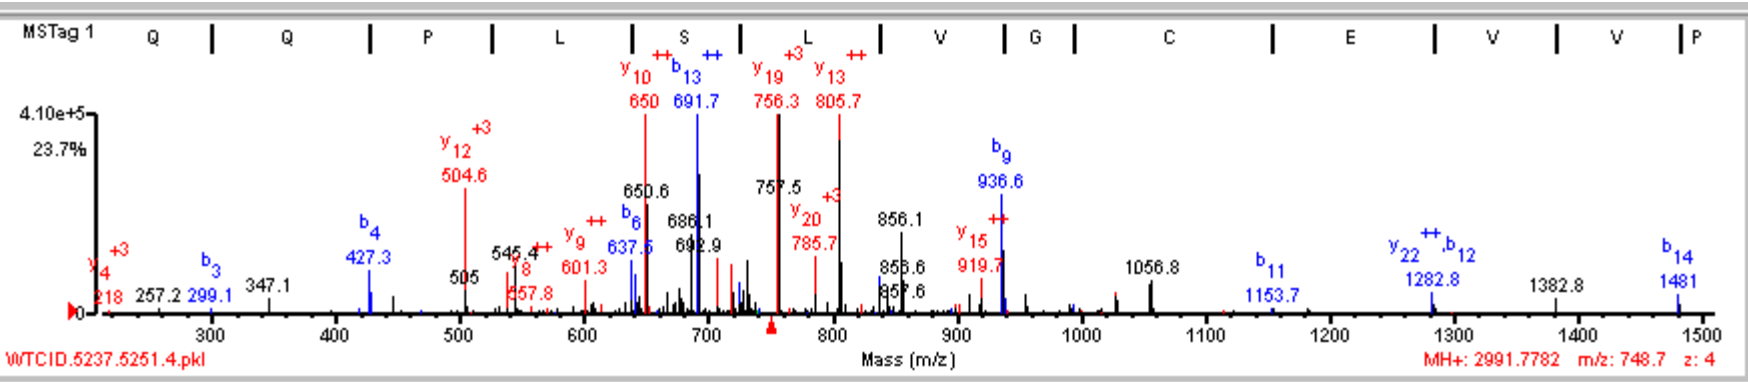

CID

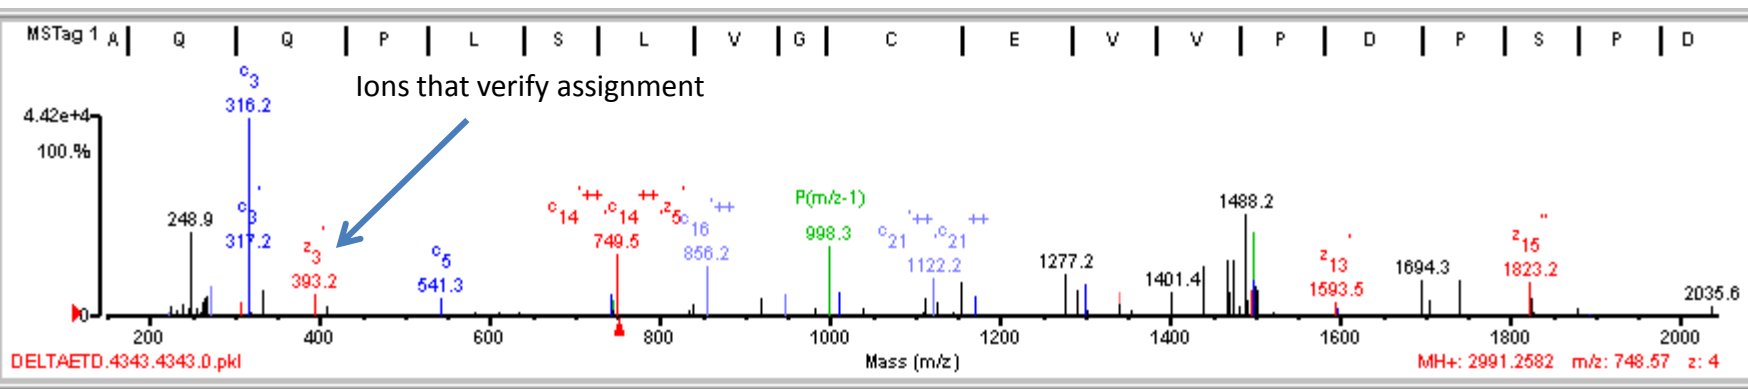

ETD

1 21.25 92.7 12 5/25 Y413y (K) V A Q Q P L S L V G C E I V V P D P S P D H L Y S F R (I) 2910.45 81.3327 456.7 91300.1/5.21 Homo sapiens [50897850](#) [16304](#) KIAA1914 protein isoform 1

| Fragment-ion (m/z)     | 427.29         | 504.59                         | 537.54                         | 545.36 | 601.32                        | 637.50         | 641.87                        | 650.05                         | 677.46 | 686.11                         | 691.74                        | 707.34                          | 718.90                         | 724.59         | 732.17 | 756.26                         | 785.68                         | 805.74                         | 837.58         | 855.37                         | 919.67                          | 936.64         | 1028.41                        | 1054.70 | 1056.78 |
|------------------------|----------------|--------------------------------|--------------------------------|--------|-------------------------------|----------------|-------------------------------|--------------------------------|--------|--------------------------------|-------------------------------|---------------------------------|--------------------------------|----------------|--------|--------------------------------|--------------------------------|--------------------------------|----------------|--------------------------------|---------------------------------|----------------|--------------------------------|---------|---------|
| Frac. Inten.(% of TIC) | 1.47           | 3.56                           | 1.34                           | 1.38   | 0.92                          | 1.62           | 1.46                          | 7.74                           | 1.11   | 2.44                           | 10.58                         | 1.91                            | 1.71                           | 0.04           | 2.33   | 29.53                          | 2.05                           | 11.72                          | 1.65           | 5.86                           | 1.28                            | 4.71           | 1.09                           | 1.25    | 1.23    |
| Rel. Inten.(% of BP)   | 4.98           | 12.07                          | 4.53                           | 4.66   | 3.11                          | 5.50           | 4.93                          | 26.22                          | 3.76   | 8.27                           | 35.83                         | 6.46                            | 5.79                           | 0.14           | 7.89   | 100.00                         | 6.95                           | 39.68                          | 5.59           | 19.84                          | 4.34                            | 15.96          | 3.68                           | 4.24    | 4.15    |
| Score                  | 1.00           | 1.00                           | 1.00                           | -0.05  | 1.00                          | 1.00           | 1.00                          | 1.00                           | -0.04  | 1.00                           | 1.00                          | 1.00                            | 1.00                           | 1.50           | -0.08  | 1.00                           | 1.00                           | 1.00                           | 1.00           | 1.00                           | 1.00                            | 1.00           | 1.00                           | 1.00    | -0.04   |
| Ion-type               | b <sub>4</sub> | y <sup>+++</sup> <sub>12</sub> | y <sup>+++</sup> <sub>13</sub> |        | y <sup>+++</sup> <sub>9</sub> | b <sub>6</sub> | b <sup>++</sup> <sub>12</sub> | y <sup>+++</sup> <sub>10</sub> |        | y <sup>+++</sup> <sub>17</sub> | b <sup>++</sup> <sub>13</sub> | b <sub>7</sub> -NH <sub>3</sub> | y <sup>+++</sup> <sub>18</sub> | b <sub>7</sub> |        | y <sup>+++</sup> <sub>12</sub> | y <sup>+++</sup> <sub>20</sub> | y <sup>+++</sup> <sub>13</sub> | b <sub>8</sub> | y <sup>+++</sup> <sub>14</sub> | b <sub>9</sub> -NH <sub>3</sub> | b <sub>9</sub> | y <sup>+++</sup> <sub>17</sub> |         |         |
| Delta Da               | 0.06           | 0.37                           | 0.30                           |        | 0.06                          | 0.13           | 0.04                          | 0.27                           |        | 0.48                           | 0.38                          | -0.03                           | 0.25                           | 0.19           |        | 0.44                           | 0.32                           | 0.38                           | 0.10           | 0.48                           | 0.15                            | 0.09           | 0.47                           |         |         |
|                        |                |                                |                                |        |                               |                |                               |                                |        |                                |                               | y <sup>+++</sup> <sub>11</sub>  | sty                            |                |        |                                |                                |                                |                |                                | y <sup>+++</sup> <sub>15</sub>  |                |                                |         |         |
|                        |                |                                |                                |        |                               |                |                               |                                |        |                                |                               | 0.04                            | 0.25                           | 0.73           |        |                                |                                |                                |                |                                | 0.26                            |                |                                |         |         |



# Peak 237

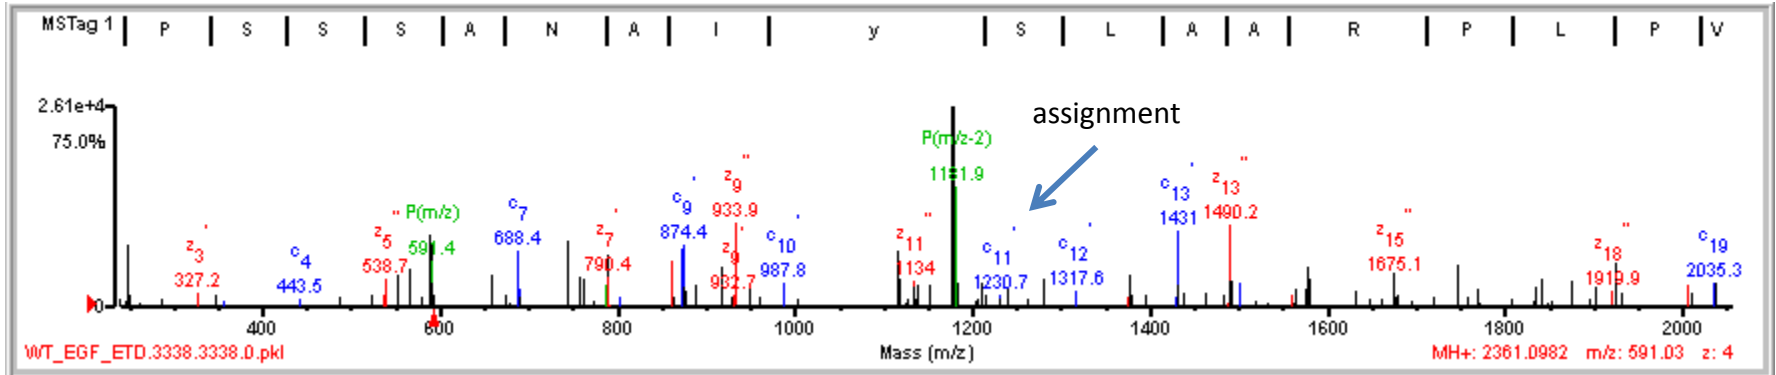

| Rank                    | Score          | SPI (%)                       | BCS                           | # Unmatched Ions | Variable sites                | Sequence                                                                        | MH <sup>+</sup> Calculated (Da) | MH <sup>+</sup> Error (Da)    | MH <sup>+</sup> Error (ppm)   | Protein MW/pI (Da)           | Species                       | Accession #                   | MS-Digest Index #            | Protein Name                                                 |                 |                               |                               |         |         |         |         |         |
|-------------------------|----------------|-------------------------------|-------------------------------|------------------|-------------------------------|---------------------------------------------------------------------------------|---------------------------------|-------------------------------|-------------------------------|------------------------------|-------------------------------|-------------------------------|------------------------------|--------------------------------------------------------------|-----------------|-------------------------------|-------------------------------|---------|---------|---------|---------|---------|
| 1                       | 8.69           | 77.9                          | 12                            | 6/22             | Y674y                         | (K) I / K P P S S / S / A / N A / I / Y / S / L / I / A / R P / L P V P \ K (L) | 2280.31                         | 80.7907                       | 349.2                         | 99633.4/6.10                 | Homo sapiens                  | <a href="#">52426745</a>      | <a href="#">29140</a>        | Cas-Br-M (murine) ecotropic retroviral transforming sequence |                 |                               |                               |         |         |         |         |         |
| Fragment-ion (m/z)      | 249.09         | 553.70                        | 567.52                        | 658.84           | 688.42                        | 744.84                                                                          | 758.56                          | 861.85                        | 873.70                        | 917.21                       | 933.89                        | 1116.26                       | 1133.96                      | 1280.05                                                      | 1430.96         | 1490.22                       | 1501.13                       | 1578.95 | 1675.10 | 1746.46 | 1834.64 | 1925.27 |
| Frac. Inten. (% of TIC) | 6.29           | 2.24                          | 2.55                          | 2.24             | 5.77                          | 4.51                                                                            | 2.29                            | 3.11                          | 10.76                         | 3.20                         | 5.85                          | 5.67                          | 3.80                         | 3.31                                                         | 6.55            | 10.09                         | 3.17                          | 4.54    | 5.53    | 2.84    | 2.65    | 3.04    |
| Rel. Inten. (% of BP)   | 58.48          | 20.83                         | 23.70                         | 20.83            | 53.61                         | 41.94                                                                           | 21.33                           | 28.92                         | 100.00                        | 29.80                        | 54.37                         | 52.71                         | 35.32                        | 30.76                                                        | 60.93           | 93.84                         | 29.45                         | 42.20   | 51.39   | 26.43   | 24.66   | 28.23   |
| Score                   | -0.58          | 0.25                          | 1.00                          | 1.00             | 1.00                          | 1.00                                                                            | -0.21                           | 1.00                          | 1.00                          | 1.00                         | 0.25                          | 1.00                          | 0.25                         | -0.31                                                        | 0.25            | 0.25                          | 1.00                          | -0.42   | 0.25    | 0.25    | -0.25   | -0.28   |
| Ion-type                | y <sub>5</sub> | z <sup>++</sup> <sub>11</sub> | c <sup>++</sup> <sub>12</sub> | c <sub>7</sub>   | c <sup>++</sup> <sub>21</sub> | z <sup>++</sup> <sub>12</sub>                                                   | z <sup>++</sup> <sub>13</sub>   | z <sup>++</sup> <sub>18</sub> | z <sup>++</sup> <sub>17</sub> | z <sup>++</sup> <sub>9</sub> | c <sup>++</sup> <sub>21</sub> | z <sup>++</sup> <sub>11</sub> | c <sup>+</sup> <sub>13</sub> | z <sup>++</sup> <sub>13</sub>                                | c <sub>14</sub> | z <sup>++</sup> <sub>15</sub> | z <sup>++</sup> <sub>16</sub> |         |         |         |         |         |
| Delta Da                |                | 0.33                          | 0.67                          | 0.02             | 0.02                          | 0.44                                                                            | 0.05                            | 0.31                          | 0.22                          | 0.73                         | 0.30                          | 0.16                          | 0.26                         | 0.24                                                         | 0.40            | 0.38                          | 0.20                          | 0.53    |         |         |         |         |





# Peak 240

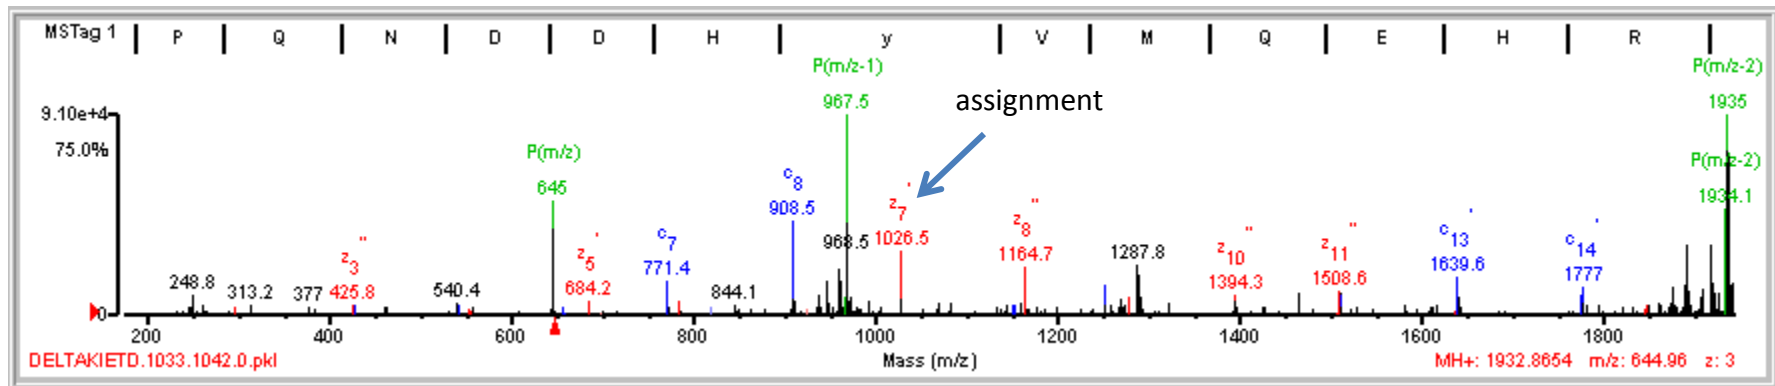

| Rank | Score | SPI (%) | BCS | # Unmatched Ions | Variable sites | Sequence                              | MH* Calculated (Da) | MH* Error (Da) | MH* Error (ppm) | Protein MW/pI (Da) | Species      | Accession #              | MS-Digest Index #     | Protein Name                               |
|------|-------|---------|-----|------------------|----------------|---------------------------------------|---------------------|----------------|-----------------|--------------------|--------------|--------------------------|-----------------------|--------------------------------------------|
| 1    | 8.98  | 73.7    | 11  | 8/24             | Y284y          | (R) A/L P Q/N/D/D H Y V\M Q\E\H\R (K) | 1852.84             | 80.0259        | 30.8            | 114569.2/6.85      | Homo sapiens | <a href="#">56549666</a> | <a href="#">24052</a> | tyrosine kinase, non-receptor, 2 isoform 1 |
| 1    | 8.98  | 73.7    | 11  | 8/24             | Y347y          | (R) A/L P Q/N/D/D H Y V\M Q\E\H\R (K) | 1852.84             | 80.0259        | 30.8            | 119349.6/7.60      | Homo sapiens | <a href="#">58331191</a> | <a href="#">30304</a> | tyrosine kinase, non-receptor, 2 isoform 2 |

| Fragment-ion (m/z)      | 246.08 | 248.85 | 540.45 | 771.42         | 783.45         | 908.49         | 1026.53        | 1151.50        | 1164.66        | 1250.81         | 1272.20 | 1278.53        | 1286.73 | 1287.84 | 1290.58 | 1394.33         | 1465.72 | 1508.64         | 1510.09         | 1639.56         | 1775.77         | 1776.96         | 1847.08         | 1861.14         |
|-------------------------|--------|--------|--------|----------------|----------------|----------------|----------------|----------------|----------------|-----------------|---------|----------------|---------|---------|---------|-----------------|---------|-----------------|-----------------|-----------------|-----------------|-----------------|-----------------|-----------------|
| Frac. Inten. (% of TIC) | 1.84   | 1.81   | 2.09   | 3.40           | 1.67           | 14.86          | 10.39          | 1.99           | 5.44           | 4.94            | 1.93    | 1.71           | 1.67    | 11.21   | 3.40    | 5.35            | 2.29    | 2.20            | 4.90            | 5.16            | 1.81            | 4.51            | 2.25            | 3.18            |
| Rel. Inten. (% of BP)   | 12.40  | 12.17  | 14.09  | 22.89          | 11.23          | 100.00         | 69.94          | 13.38          | 36.58          | 33.23           | 13.00   | 11.53          | 11.25   | 75.46   | 22.90   | 35.98           | 15.41   | 14.80           | 33.01           | 34.71           | 12.19           | 30.33           | 15.16           | 21.40           |
| Score                   | -0.12  | -0.12  | -0.14  | 1.00           | 1.00           | 1.00           | 1.00           | 1.00           | 0.25           | 1.00            | -0.13   | 1.00           | -0.11   | -0.75   | -0.23   | 0.25            | -0.15   | 0.25            | 1.00            | 0.25            | 1.00            | 0.25            | 0.25            | 0.25            |
| Ion-type                |        |        |        | c <sub>7</sub> | z <sub>6</sub> | c <sub>8</sub> | z <sub>7</sub> | c <sub>9</sub> | z <sub>8</sub> | c <sub>10</sub> |         | z <sub>9</sub> |         |         |         | z <sub>10</sub> |         | z <sub>11</sub> | c <sub>12</sub> | c <sub>13</sub> | c <sub>14</sub> | c <sub>14</sub> | z <sub>14</sub> | y <sub>14</sub> |
| Delta Da                |        |        |        | 0.06           | 0.08           | 0.07           | 0.13           | 0.05           | 0.19           | 0.29            |         | 0.05           |         |         |         | -0.19           |         | 0.08            | 0.47            | -0.11           | 0.05            | 0.23            | 0.32            | -0.63           |

# Peak 241

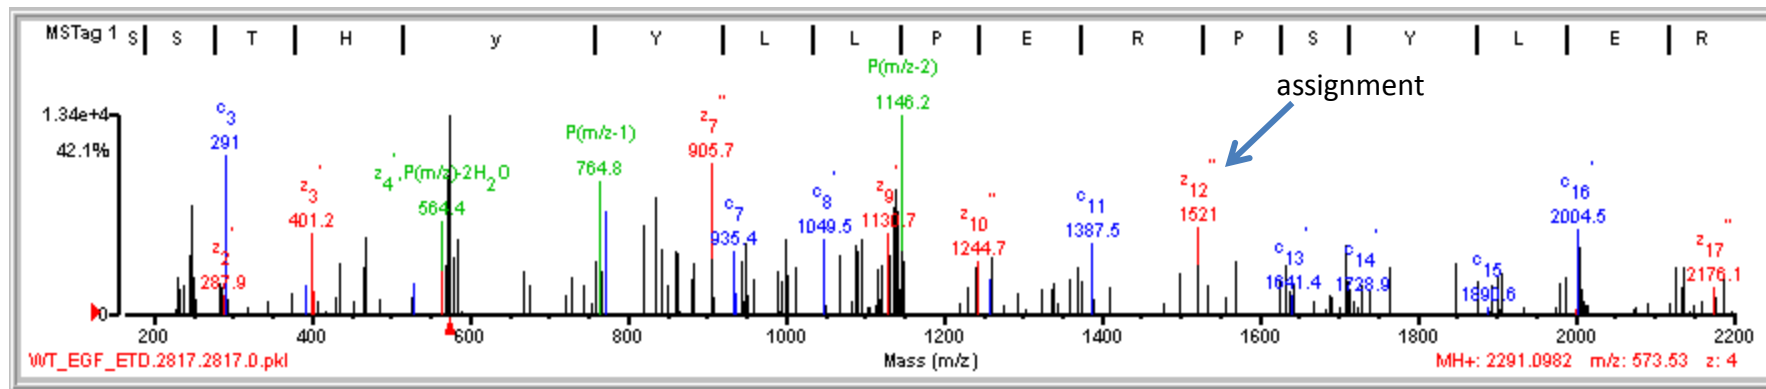

| Rank | Score | SPI (%) | BCS | # Unmatched Ions | Variable sites | Sequence                                                       | MH <sup>+</sup> Calculated (Da) | MH <sup>+</sup> Error (Da) | MH <sup>+</sup> Error (ppm) | Protein MW/pi (Da) | Species      | Accession #              | MS-Digest Index #     | Protein Name                               |
|------|-------|---------|-----|------------------|----------------|----------------------------------------------------------------|---------------------------------|----------------------------|-----------------------------|--------------------|--------------|--------------------------|-----------------------|--------------------------------------------|
| 1    | 8.88  | 77.6    | 11  | 4/19             | Y859y          | (K) V/S S   T/H Y   Y\ L   L P   E   R P \ S / Y / L \ E R (Y) | 2210.12                         | 80.9741                    | 439.9                       | 114569.2/6.85      | Homo sapiens | <a href="#">56549666</a> | <a href="#">24052</a> | tyrosine kinase, non-receptor, 2 isoform 1 |
| 1    | 8.88  | 77.6    | 11  | 4/19             | Y937y          | (K) V/S S   T/H Y   Y\ L   L P   E   R P \ S / Y / L \ E R (Y) | 2210.12                         | 80.9741                    | 439.9                       | 119349.6/7.60      | Homo sapiens | <a href="#">58331191</a> | <a href="#">30304</a> | tyrosine kinase, non-receptor, 2 isoform 2 |

| Fragment-ion (m/z)     | 246.98 | 248.79 | 291.02                        | 401.20         | 469.33                        | 772.35         | 821.04                         | 834.84 | 905.68                       | 935.43         | 950.44                         | 1001.74                        | 1049.54        | 1088.17                        | 1259.51         | 1387.54         | 1520.98                       | 2003.61         | 2006.93 |
|------------------------|--------|--------|-------------------------------|----------------|-------------------------------|----------------|--------------------------------|--------|------------------------------|----------------|--------------------------------|--------------------------------|----------------|--------------------------------|-----------------|-----------------|-------------------------------|-----------------|---------|
| Frac. Inten.(% of TIC) | 5.75   | 8.37   | 7.18                          | 4.18           | 3.05                          | 5.73           | 3.54                           | 4.62   | 9.43                         | 3.37           | 3.59                           | 5.77                           | 3.37           | 7.83                           | 3.70            | 5.89            | 5.42                          | 5.58            | 3.64    |
| Rel. Inten.(% of BP)   | 61.01  | 88.72  | 76.14                         | 44.27          | 32.39                         | 60.71          | 37.52                          | 49.00  | 100.00                       | 35.74          | 38.05                          | 61.19                          | 35.68          | 83.00                          | 39.22           | 62.45           | 57.48                         | 59.13           | 38.55   |
| Score                  | -0.61  | -0.89  | 1.00                          | 1.00           | 0.25                          | 1.00           | 1.00                           | -0.49  | 0.25                         | 1.00           | 1.00                           | 1.00                           | 0.25           | 1.00                           | 0.25            | 1.00            | 0.25                          | 1.00            | -0.39   |
| Ion-type               |        |        | c <sub>3</sub>                | z <sub>3</sub> | c <sup>+++</sup> <sub>7</sub> | c <sub>6</sub> | c <sup>+++</sup> <sub>13</sub> |        | z <sup>''</sup> <sub>7</sub> | c <sub>7</sub> | z <sup>+++</sup> <sub>14</sub> | z <sup>+++</sup> <sub>15</sub> | c <sub>8</sub> | z <sup>+++</sup> <sub>17</sub> | c <sub>10</sub> | c <sub>11</sub> | z <sup>''</sup> <sub>12</sub> | c <sub>16</sub> |         |
| Delta Da               |        |        | -0.15                         | -0.03          | 0.64                          | 0.05           | 0.14                           |        | 0.20                         | 0.06           | -0.01                          | 0.77                           | 0.08           | 0.16                           | -0.08           | -0.09           | 0.17                          | -0.35           |         |
|                        |        |        | y <sup>+++</sup> <sub>4</sub> | 0.36           |                               |                |                                |        |                              |                |                                |                                | y <sub>8</sub> | y <sub>10</sub>                |                 |                 |                               |                 |         |
|                        |        |        |                               |                |                               |                |                                |        |                              |                |                                |                                | 0.00           | -0.16                          |                 |                 |                               |                 |         |



# Peak 244

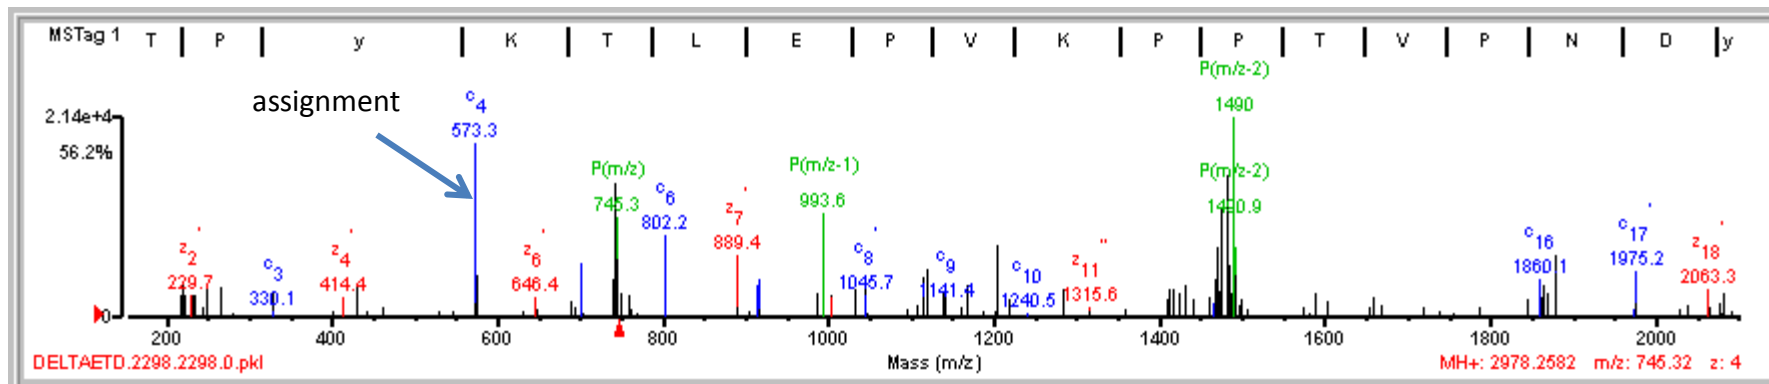

|   |       |      |    |      |             |                                                                               |         |          |       |              |              |                          |                       |                            |
|---|-------|------|----|------|-------------|-------------------------------------------------------------------------------|---------|----------|-------|--------------|--------------|--------------------------|-----------------------|----------------------------|
| 1 | 10.72 | 71.3 | 12 | 8/24 | Y198y Y213y | (R) N/T P/y   K   T \ L   E P V K P P/T V P   N \ D   y / M T / S P A \ R (L) | 2816.43 | 161.8294 | 636.9 | 49376.3/6.81 | Homo sapiens | <a href="#">61743946</a> | <a href="#">4905</a>  | abl-interactor 1 isoform c |
| 1 | 10.72 | 71.3 | 12 | 8/24 | Y193y Y208y | (R) N/T P/y   K   T \ L   E P V K P P/T V P   N \ D   y / M T / S P A \ R (L) | 2816.43 | 161.8294 | 636.9 | 51841.2/6.39 | Homo sapiens | <a href="#">61743948</a> | <a href="#">10824</a> | abl-interactor 1 isoform d |

| Fragment-ion (m/z)      | 220.31 | 430.42         | 573.26         | 575.45 | 646.36          | 701.25         | 739.71 | 802.19         | 889.38                         | 915.49         | 1003.04 | 1031.96                       | 1044.92                       | 1114.40 | 1118.88         | 1139.04                       | 1204.57 | 1410.92                        | 1431.64         | 1467.65 | 1860.08         | 1879.25 | 1975.25                      | 2063.32          |
|-------------------------|--------|----------------|----------------|--------|-----------------|----------------|--------|----------------|--------------------------------|----------------|---------|-------------------------------|-------------------------------|---------|-----------------|-------------------------------|---------|--------------------------------|-----------------|---------|-----------------|---------|------------------------------|------------------|
| Frac. Inten. (% of TIC) | 5.61   | 2.31           | 12.64          | 2.82   | 2.67            | 4.06           | 2.63   | 8.36           | 5.65                           | 5.32           | 2.93    | 3.20                          | 4.16                          | 2.76    | 3.32            | 3.74                          | 4.91    | 3.23                           | 2.23            | 2.92    | 2.57            | 4.17    | 4.56                         | 3.26             |
| Rel. Inten. (% of BP)   | 44.41  | 18.25          | 100.00         | 22.36  | 21.11           | 32.11          | 20.78  | 66.17          | 44.71                          | 42.08          | 23.21   | 25.30                         | 32.95                         | 21.84   | 26.26           | 29.57                         | 38.85   | 25.54                          | 17.65           | 23.10   | 20.30           | 32.98   | 36.07                        | 25.81            |
| Score                   | -0.44  | 0.25           | 1.00           | -0.22  | 1.00            | 1.00           | -0.21  | 1.00           | 1.00                           | 1.00           | -0.23   | 1.00                          | 1.00                          | -0.22   | 1.00            | 1.00                          | -0.39   | 0.25                           | 0.25            | -0.23   | 1.00            | -0.33   | 0.25                         | 1.00             |
| Ion-type                |        | y <sub>4</sub> | c <sub>4</sub> |        | z' <sub>6</sub> | c <sub>5</sub> |        | c <sub>6</sub> | y <sup>+++</sup> <sub>22</sub> | c <sub>7</sub> |         | z <sup>++</sup> <sub>18</sub> | c <sup>++</sup> <sub>18</sub> |         | z' <sub>9</sub> | z <sup>++</sup> <sub>20</sub> |         | c <sup>+++</sup> <sub>24</sub> | y <sub>12</sub> |         | c <sub>16</sub> |         | c <sup>'</sup> <sub>17</sub> | z' <sub>18</sub> |
| Delta Da                |        | 0.18           | 0.05           |        | 0.05            | -0.05          |        | -0.16          | 0.64                           | 0.06           |         | -0.02                         | -0.10                         |         | 0.47            | -0.00                         |         | 0.27                           | 0.04            |         | 0.11            |         | 0.23                         | 0.38             |

# Peak 246

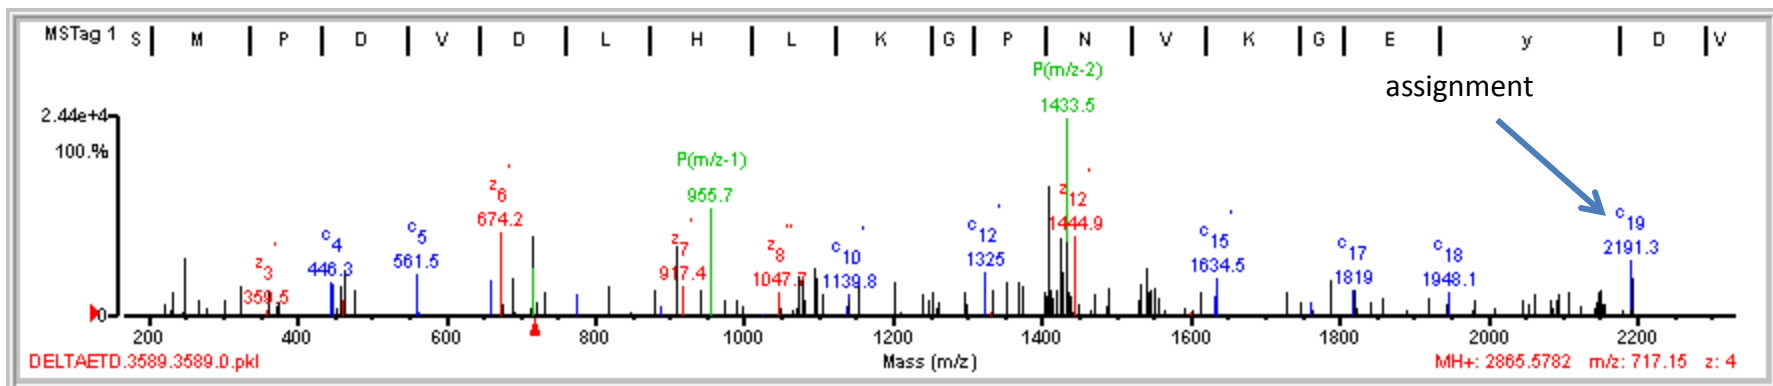

| Rank                   | Score  | SPI (%)        | BCS            | # Unmatched Ions              | Variable sites                | Sequence                                                    | MH <sup>+</sup> Calculated (Da) | MH <sup>+</sup> Error (Da)    | MH <sup>+</sup> Error (ppm)   | Protein MW/pl (Da)            | Species      | Accession #                  | MS-Digest Index #    | Protein Name                  |                 |                 |                 |
|------------------------|--------|----------------|----------------|-------------------------------|-------------------------------|-------------------------------------------------------------|---------------------------------|-------------------------------|-------------------------------|-------------------------------|--------------|------------------------------|----------------------|-------------------------------|-----------------|-----------------|-----------------|
| 1                      | 9.48   | 66.3           | 11             | 5/17                          | Y836y                         | (K) I/S M P\D\V D L H L K G P/N/V\K G\E/y\I D\V T M P\K (V) | 2783.41                         | 82.1675                       | 768.1                         | 629104.8/5.80                 | Homo sapiens | <a href="#">61743954</a>     | <a href="#">7227</a> | AHNAK nucleoprotein isoform 1 |                 |                 |                 |
| Fragment-ion (m/z)     | 248.82 | 446.29         | 561.47         | 674.21                        | 910.72                        | 917.39                                                      | 1078.06                         | 1096.73                       | 1154.21                       | 1368.40                       | 1410.54      | 1444.92                      | 1531.10              | 1541.13                       | 1633.71         | 1818.96         | 2191.34         |
| Frac. Inten.(% of TIC) | 6.90   | 5.71           | 3.94           | 7.20                          | 5.97                          | 4.81                                                        | 5.07                            | 4.06                          | 5.45                          | 5.07                          | 13.41        | 6.78                         | 4.23                 | 4.14                          | 4.99            | 4.94            | 7.33            |
| Rel. Inten.(% of BP)   | 51.42  | 42.55          | 29.42          | 53.67                         | 44.52                         | 35.89                                                       | 37.82                           | 30.30                         | 40.64                         | 37.81                         | 100.00       | 50.58                        | 31.54                | 30.90                         | 37.24           | 36.81           | 54.64           |
| Score                  | -0.51  | 1.00           | 1.00           | 1.00                          | 1.00                          | 1.00                                                        | -0.38                           | 1.00                          | 1.00                          | 1.00                          | -1.00        | 1.00                         | -0.32                | -0.31                         | 1.00            | 1.00            | 1.00            |
| Ion-type               |        | c <sub>4</sub> | c <sub>5</sub> | y <sup>++</sup> <sub>11</sub> | c <sup>++</sup> <sub>17</sub> | y <sup>+++</sup> <sub>24</sub>                              |                                 | c <sup>++</sup> <sub>19</sub> | c <sup>++</sup> <sub>20</sub> | c <sup>++</sup> <sub>24</sub> |              | z <sup>'</sup> <sub>12</sub> |                      |                               | c <sub>15</sub> | c <sub>17</sub> | c <sub>19</sub> |
| Delta Da               |        | 0.05           | 0.20           | 0.40                          | 0.72                          | -0.05                                                       |                                 | 0.70                          | 0.66                          | 0.75                          |              | 0.29                         |                      |                               | -0.16           | -0.03           | 0.28            |
|                        |        |                |                | z <sup>'</sup> <sub>e</sub>   | z <sup>'</sup> <sub>7</sub>   |                                                             |                                 |                               |                               | z <sup>++</sup> <sub>24</sub> |              |                              |                      |                               |                 |                 |                 |
|                        |        |                |                | -0.12                         | 0.03                          |                                                             |                                 |                               |                               | 0.76                          |              |                              |                      |                               |                 |                 |                 |



# Peak 247

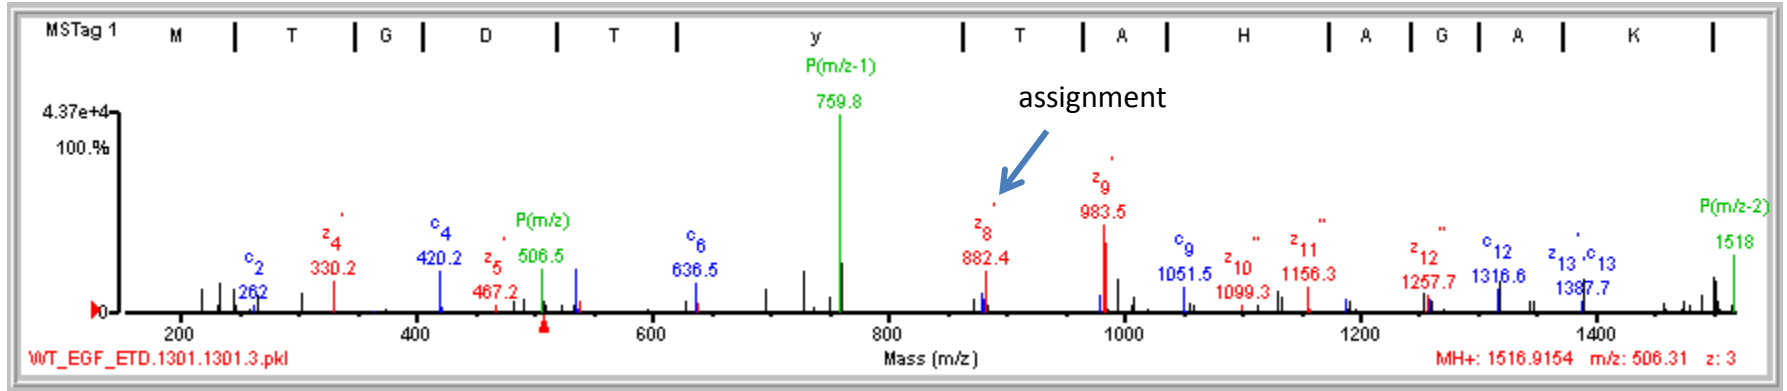

| ID | RT    | Abundance | Charge | Protein | Modifications                       | Mass (m/z) | Intensity | Species | Accession     | Score        | Gene                                            |                                                                  |
|----|-------|-----------|--------|---------|-------------------------------------|------------|-----------|---------|---------------|--------------|-------------------------------------------------|------------------------------------------------------------------|
| 1  | 12.55 | 74.6      | 12     | Y412y   | (R) L/M/T/G/D T Y\T\A H A G A\K (F) | 1436.68    | 80.2316   | 174.9   | 124955.4/8.96 | Homo sapiens | <a href="#">62362412</a> <a href="#">744</a>    | v-abl Abelson murine leukemia viral oncogene homolog 1 isoform b |
| 1  | 12.55 | 74.6      | 12     | Y393y   | (R) L/M/T/G/D T Y\T\A H A G A\K (F) | 1436.68    | 80.2316   | 174.9   | 122873.2/8.84 | Homo sapiens | <a href="#">62362414</a> <a href="#">2229</a>   | v-abl Abelson murine leukemia viral oncogene homolog 1 isoform a |
| 1  | 12.55 | 74.6      | 12     | Y439y   | (R) L/M/T/G/D T Y\T\A H A G A\K (F) | 1436.68    | 80.2316   | 174.9   | 128343.6/8.31 | Homo sapiens | <a href="#">6382062</a> <a href="#">2487</a>    | v-abl Abelson murine leukemia viral oncogene homolog 2 isoform b |
| 1  | 12.55 | 74.6      | 12     | Y424y   | (R) L/M/T/G/D T Y\T\A H A G A\K (F) | 1436.68    | 80.2316   | 174.9   | 126684.9/6.82 | Homo sapiens | <a href="#">153266778</a> <a href="#">26935</a> | v-abl Abelson murine leukemia viral oncogene homolog 2 isoform c |
| 1  | 12.55 | 74.6      | 12     | Y403y   | (R) L/M/T/G/D T Y\T\A H A G A\K (F) | 1436.68    | 80.2316   | 174.9   | 124560.7/7.52 | Homo sapiens | <a href="#">153266757</a> <a href="#">33942</a> | v-abl Abelson murine leukemia viral oncogene homolog 2 isoform a |

| Fragment-ion (m/z)     | 217.64         | 233.33                        | 245.60 | 302.24 | 330.23         | 420.19         | 535.38         | 636.52         | 695.58                         | 879.31         | 882.40         | 980.24         | 983.53         | 994.44 | 1007.51 | 1051.49        | 1130.24 | 1156.34                       | 1188.75         | 1254.24 | 1257.73                       | 1316.58         | 1318.84 | 1387.66         | 1389.57 |
|------------------------|----------------|-------------------------------|--------|--------|----------------|----------------|----------------|----------------|--------------------------------|----------------|----------------|----------------|----------------|--------|---------|----------------|---------|-------------------------------|-----------------|---------|-------------------------------|-----------------|---------|-----------------|---------|
| Frac. Inten.(% of TIC) | 2.58           | 5.50                          | 4.67   | 2.19   | 3.44           | 5.34           | 5.36           | 3.29           | 3.71                           | 3.88           | 4.51           | 2.07           | 17.47          | 3.69   | 2.90    | 3.39           | 2.39    | 3.58                          | 2.24            | 2.12    | 2.38                          | 3.21            | 3.43    | 2.69            | 3.98    |
| Rel. Inten.(% of BP)   | 14.77          | 31.45                         | 26.72  | 12.53  | 19.68          | 30.56          | 30.67          | 18.83          | 21.26                          | 22.21          | 25.79          | 11.87          | 100.00         | 21.11  | 16.61   | 19.38          | 13.67   | 20.50                         | 12.83           | 12.13   | 13.63                         | 18.37           | 19.60   | 15.38           | 22.80   |
| Score                  | 0.25           | 1.00                          | -0.27  | -0.13  | 1.00           | 1.00           | 1.00           | 1.00           | 0.25                           | 1.00           | 1.00           | 1.00           | 1.00           | -0.21  | -0.17   | 1.00           | -0.14   | 0.25                          | 1.00            | -0.12   | 0.25                          | 1.00            | -0.20   | 1.00            | -0.23   |
| Ion-type               | y <sub>2</sub> | z <sup>+++</sup> <sub>5</sub> |        |        | z <sub>4</sub> | c <sub>4</sub> | c <sub>5</sub> | c <sub>6</sub> | c <sup>+++</sup> <sub>13</sub> | c <sub>7</sub> | z <sub>8</sub> | c <sub>8</sub> | z <sub>9</sub> |        |         | c <sub>9</sub> |         | z <sup>''</sup> <sub>11</sub> | c <sub>10</sub> |         | z <sup>''</sup> <sub>12</sub> | c <sub>12</sub> |         | c <sub>13</sub> |         |
| Delta Da               | -0.51          | -0.80                         |        |        | 0.04           | -0.04          | 0.13           | 0.22           | 0.79                           | -0.02          | 0.04           | -0.14          | 0.12           |        |         | 0.07           |         | -0.13                         | 0.27            |         | 0.22                          | 0.05            |         | 0.09            | 0.11    |

# Peak 248

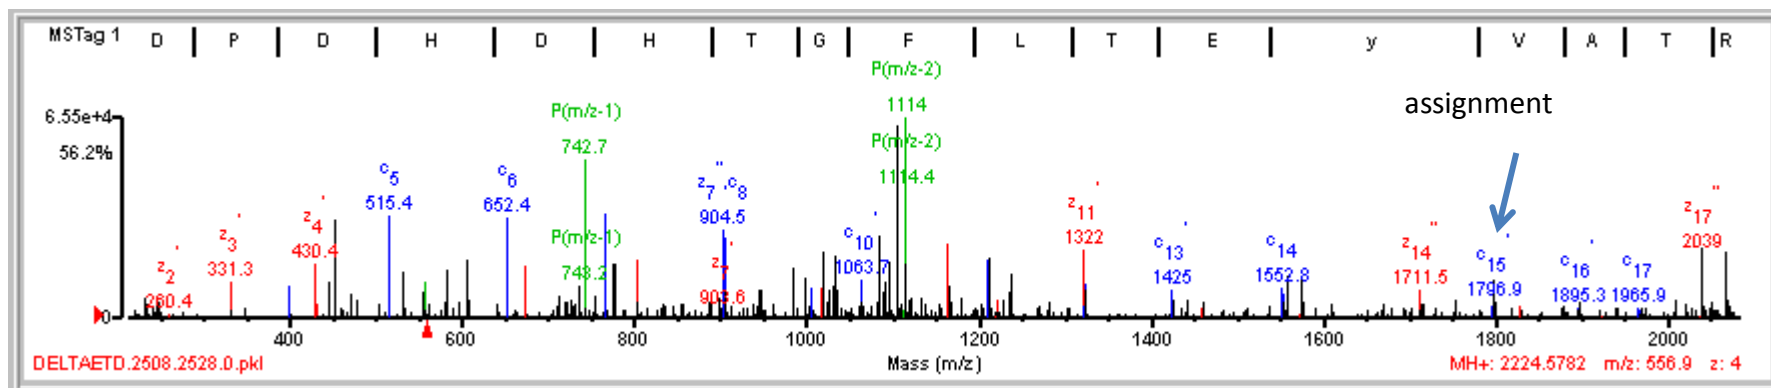

| Rank                   | Score          | SPI (%)        | BCS               | # Unmatched Ions | Variable sites     | Sequence                                     | MH <sup>+</sup> Calculated (Da) | MH <sup>+</sup> Error (Da) | MH <sup>+</sup> Error (ppm) | Protein MW/pl (Da) | Species        | Accession #              | MS-Digest Index #     | Protein Name                       |                    |                    |                |                 |                 |                 |                 |         |                 |                 |
|------------------------|----------------|----------------|-------------------|------------------|--------------------|----------------------------------------------|---------------------------------|----------------------------|-----------------------------|--------------------|----------------|--------------------------|-----------------------|------------------------------------|--------------------|--------------------|----------------|-----------------|-----------------|-----------------|-----------------|---------|-----------------|-----------------|
| 1                      | 18.27          | 94.1           | 14                | 2/24             | Y187y              | (R)V/A/D P D\H\D\H T\G F\L T/E Y/V/A T\R (W) | 2144.00                         | 80.5738                    | 273.1                       | 41389.9/6.50       | Homo sapiens   | <a href="#">66932916</a> | <a href="#">20787</a> | mitogen-activated protein kinase 1 |                    |                    |                |                 |                 |                 |                 |         |                 |                 |
| 1                      | 18.27          | 94.1           | 14                | 2/24             | Y187y              | (R)V/A/D P D\H\D\H T\G F\L T/E Y/V/A T\R (W) | 2144.00                         | 80.5738                    | 273.1                       | 41389.9/6.50       | Homo sapiens   | <a href="#">20986531</a> | <a href="#">21374</a> | mitogen-activated protein kinase 1 |                    |                    |                |                 |                 |                 |                 |         |                 |                 |
| Fragment-ion (m/z)     | 331.34         | 430.35         | 452.90            | 515.44           | 531.88             | 652.42                                       | 673.30                          | 767.52                     | 776.98                      | 802.64             | 904.48         | 998.91                   | 1005.52               | 1019.47                            | 1034.13            | 1063.73            | 1164.59        | 1210.52         | 1322.00         | 1323.90         | 1552.81         | 1575.89 | 2039.03         | 2068.63         |
| Frac. Inten.(% of TIC) | 2.58           | 2.81           | 4.64              | 5.42             | 0.09               | 5.53                                         | 3.26                            | 4.83                       | 6.21                        | 4.27               | 8.11           | 3.10                     | 2.64                  | 5.55                               | 3.91               | 3.46               | 4.05           | 5.84            | 4.32            | 3.04            | 3.26            | 2.81    | 6.97            | 3.32            |
| Rel. Inten.(% of BP)   | 31.84          | 34.61          | 57.29             | 66.81            | 1.09               | 68.16                                        | 40.23                           | 59.53                      | 76.55                       | 52.68              | 100.00         | 38.24                    | 32.53                 | 68.39                              | 48.20              | 42.63              | 49.96          | 72.04           | 53.32           | 37.51           | 40.26           | 34.63   | 85.93           | 40.91           |
| Score                  | 1.00           | 1.00           | 1.00              | 1.00             | 1.50               | 1.00                                         | 1.00                            | 1.00                       | 1.00                        | 1.00               | 1.00           | -0.38                    | 1.00                  | 1.00                               | 1.00               | 0.25               | 0.25           | 0.25            | 1.00            | 0.25            | 1.00            | -0.35   | 0.25            | 0.25            |
| Ion-type               | z <sub>3</sub> | z <sub>4</sub> | c <sub>++8</sub>  | c <sub>5</sub>   | c <sub>+++10</sub> | c <sub>6</sub>                               | z <sub>5</sub>                  | c <sub>7</sub>             | c <sub>+++14</sub>          | z <sub>6</sub>     | c <sub>8</sub> |                          | c <sub>9</sub>        | z <sub>+++17</sub>                 | c <sub>+++18</sub> | c <sub>10</sub>    | z <sub>9</sub> | c <sub>11</sub> | c <sub>12</sub> | c <sub>12</sub> | c <sub>14</sub> |         | z <sub>17</sub> | c <sub>18</sub> |
| Delta Da               | 0.15           | 0.10           | 0.20              | 0.19             | 0.15               | 0.12                                         | 0.02                            | 0.19                       | 0.13                        | 0.31               | 0.09           |                          | 0.08                  | 0.04                               | 0.18               | 0.26               | 0.06           | -0.02           | -0.61           | 0.28            | 0.11            |         | 0.18            | 0.74            |
|                        |                |                | z <sub>+++7</sub> | 0.71             | 1.50               | sty                                          |                                 |                            |                             |                    | z <sub>7</sub> |                          |                       |                                    |                    | y <sub>+++18</sub> |                |                 | z <sub>11</sub> |                 |                 |         |                 |                 |

# Peak 249

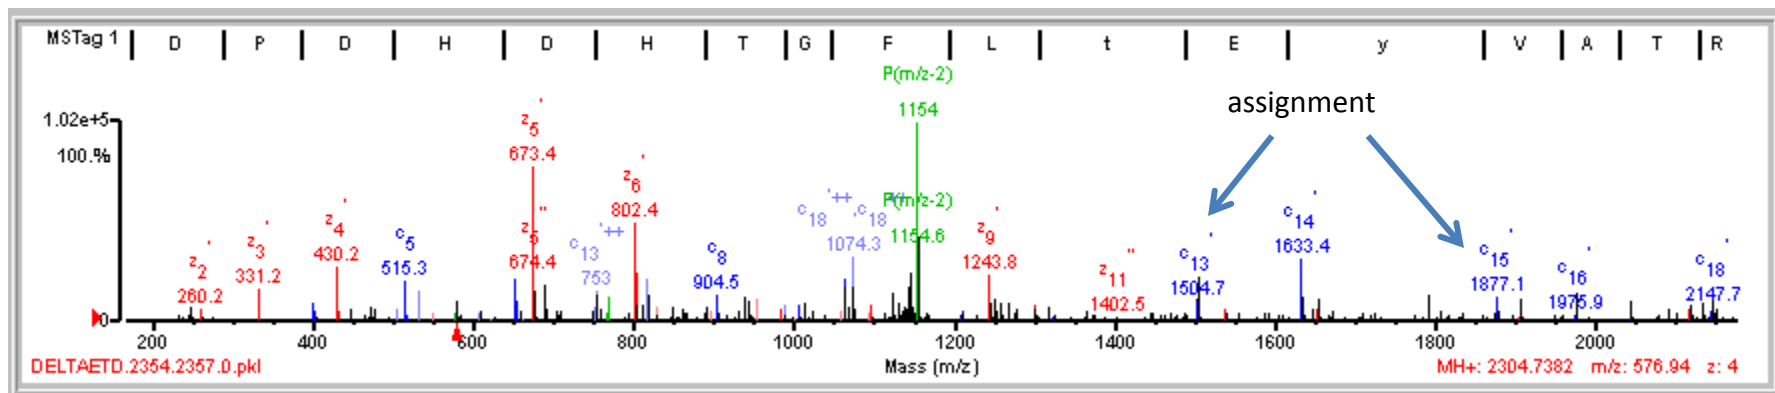

| Rank | Score | SPI (%) | BCS | # Unmatched Ions | Variable sites | Sequence                                                          | MH <sup>+</sup> Calculated (Da) | MH <sup>+</sup> Error (Da) | MH <sup>+</sup> Error (ppm) | Protein MW/pi (Da) | Species      | Accession #              | MS-Digest Index #     | Protein Name                       |
|------|-------|---------|-----|------------------|----------------|-------------------------------------------------------------------|---------------------------------|----------------------------|-----------------------------|--------------------|--------------|--------------------------|-----------------------|------------------------------------|
| 1    | 16.47 | 92.8    | 12  | 2/22             | T185t Y187y    | (R) V A D/E/D/H/D H T   G   F   L   t   E   y   V / A   T \ R (W) | 2144.00                         | 160.7338                   | 347.6                       | 41389.9/6.50       | Homo sapiens | <a href="#">66932916</a> | <a href="#">20787</a> | mitogen-activated protein kinase 1 |
| 1    | 16.47 | 92.8    | 12  | 2/22             | T185t Y187y    | (R) V A D/E/D/H/D H T   G   F   L   t   E   y   V / A   T \ R (W) | 2144.00                         | 160.7338                   | 347.6                       | 41389.9/6.50       | Homo sapiens | <a href="#">20986531</a> | <a href="#">21374</a> | mitogen-activated protein kinase 1 |

  

| Fragment-ion (m/z)     | 331.15          | 430.25          | 515.27         | 531.90                        | 652.32         | 673.35                         | 689.40         | 753.01                        | 802.42          | 817.73                        | 953.38                         | 1005.58        | 1063.75          | 1074.27                       | 1243.75         | 1300.87          | 1504.05         | 1505.82 | 1633.43         | 1976.86 | 2046.27         | 2148.65          |
|------------------------|-----------------|-----------------|----------------|-------------------------------|----------------|--------------------------------|----------------|-------------------------------|-----------------|-------------------------------|--------------------------------|----------------|------------------|-------------------------------|-----------------|------------------|-----------------|---------|-----------------|---------|-----------------|------------------|
| Frac. Inten.(% of TIC) | 2.18            | 4.80            | 3.21           | 3.30                          | 3.92           | 13.62                          | 3.72           | 3.89                          | 9.79            | 5.54                          | 2.16                           | 2.50           | 5.01             | 6.95                          | 4.72            | 2.55             | 2.61            | 4.63    | 7.23            | 2.56    | 2.20            | 2.89             |
| Rel. Inten.(% of BP)   | 16.04           | 35.27           | 23.55          | 24.20                         | 28.80          | 100.00                         | 27.28          | 28.54                         | 71.89           | 40.67                         | 15.86                          | 18.35          | 36.79            | 50.99                         | 34.67           | 18.70            | 19.19           | 33.97   | 53.09           | 18.79   | 16.18           | 21.22            |
| Score                  | 1.00            | 1.00            | 1.00           | 1.00                          | 1.00           | 1.00                           | 0.25           | 1.00                          | 1.00            | 0.25                          | 1.00                           | 1.00           | 0.25             | 1.00                          | 1.00            | 1.00             | 1.00            | -0.34   | 1.00            | -0.19   | 1.00            | 0.25             |
| Ion-type               | z' <sub>3</sub> | z' <sub>4</sub> | c <sub>5</sub> | c <sup>++</sup> <sub>10</sub> | c <sub>6</sub> | y <sup>+++</sup> <sub>16</sub> | y <sub>5</sub> | c <sup>++</sup> <sub>13</sub> | z' <sub>6</sub> | c <sup>++</sup> <sub>14</sub> | z' <sup>++</sup> <sub>15</sub> | c <sub>9</sub> | c' <sub>10</sub> | c <sup>++</sup> <sub>18</sub> | z' <sub>9</sub> | z' <sub>10</sub> | c <sub>13</sub> |         | c <sub>14</sub> |         | c <sub>17</sub> | c' <sub>18</sub> |
| Delta Da               | -0.04           | -0.00           | 0.02           | 0.17                          | 0.02           | -0.26                          | 0.10           | 0.69                          | 0.09            | 0.39                          | 0.01                           | 0.14           | 0.28             | 0.34                          | 0.26            | 0.36             | 0.42            |         | 0.76            |         | 0.47            | 0.79             |

# Peak 251

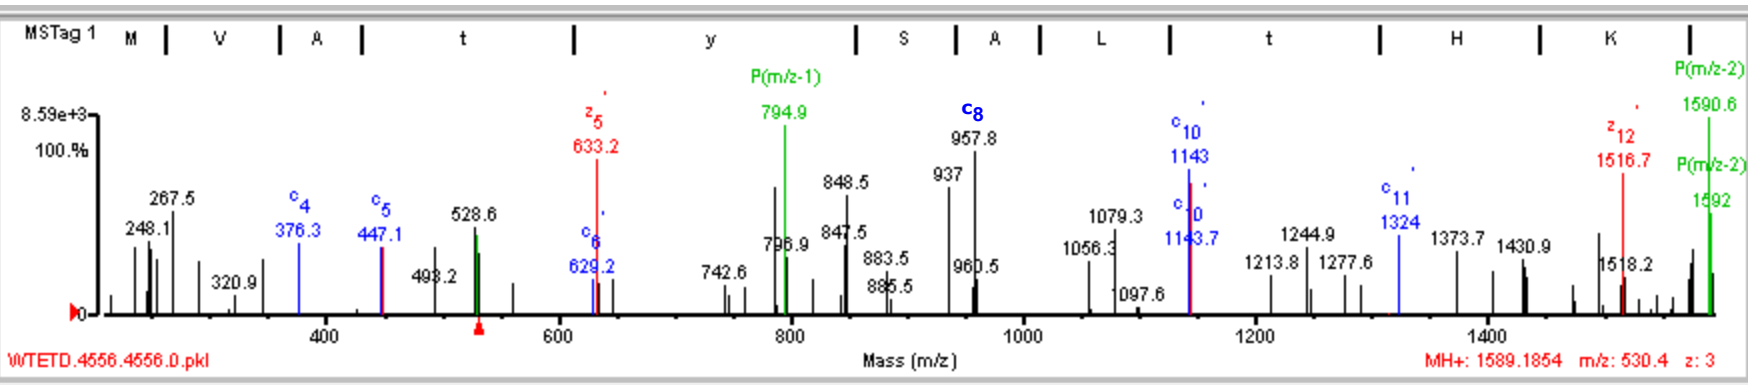

| Rank                    | Score  | SPI (%) | BCS            | # Unmatched Ions | Variable sites    | Sequence                         | MH* Calculated (Da) | MH* Error (Da) | MH* Error (ppm) | Protein MW/pl (Da) | Species        | Accession #             | MS-Digest Index #     | Protein Name                                      |         |                 |         |         |                 |
|-------------------------|--------|---------|----------------|------------------|-------------------|----------------------------------|---------------------|----------------|-----------------|--------------------|----------------|-------------------------|-----------------------|---------------------------------------------------|---------|-----------------|---------|---------|-----------------|
| 1                       | 7.06   | 58.5    | 6              | 9/19             | T710t T715t Y711y | (K)G/A M V\A t y S A L t H K (T) | 1349.69             | 239.4972       | -252.8          | 83872.5/5.92       | Homo sapiens   | <a href="#">7657526</a> | <a href="#">22744</a> | ribosomal protein S6 kinase, 90kDa, polypeptide 6 |         |                 |         |         |                 |
| Fragment-ion (m/z)      | 235.20 | 248.10  | 267.52         | 376.30           | 447.11            | 449.31                           | 494.11              | 633.19         | 847.49          | 937.03             | 957.77         | 1079.26                 | 1143.04               | 1144.63                                           | 1244.93 | 1323.99         | 1430.88 | 1496.24 | 1515.95         |
| Frac. Inten. (% of TIC) | 2.86   | 6.27    | 4.42           | 3.01             | 2.91              | 2.84                             | 2.90                | 6.54           | 8.03            | 5.40               | 6.91           | 3.61                    | 8.88                  | 5.57                                              | 2.85    | 3.34            | 6.06    | 3.50    | 14.09           |
| Rel. Inten. (% of BP)   | 20.30  | 44.49   | 31.40          | 21.35            | 20.63             | 20.16                            | 20.56               | 46.45          | 57.02           | 38.33              | 49.07          | 25.61                   | 63.06                 | 39.53                                             | 20.23   | 23.74           | 43.01   | 24.85   | 100.00          |
| Score                   | -0.20  | -0.44   | 1.00           | 1.00             | 1.00              | 1.00                             | -0.21               | 1.00           | -0.57           | -0.38              | 1.00           | -0.26                   | 1.00                  | 1.00                                              | -0.20   | 1.00            | -0.43   | -0.25   | 1.00            |
| Ion-type                |        |         | z <sub>2</sub> | c <sub>4</sub>   | c <sub>5</sub>    | z <sub>3</sub>                   |                     | z <sub>5</sub> |                 |                    | c <sub>8</sub> |                         | c <sub>10</sub>       | z <sub>8</sub>                                    |         | c <sub>11</sub> |         |         | z <sub>12</sub> |
| Delta Da                |        |         | -0.63          | 0.10             | -0.13             | 0.14                             |                     | -0.10          |                 |                    | -0.54          |                         | 0.60                  | 0.27                                              |         | 0.54            |         |         | -0.60           |

# Peak 252

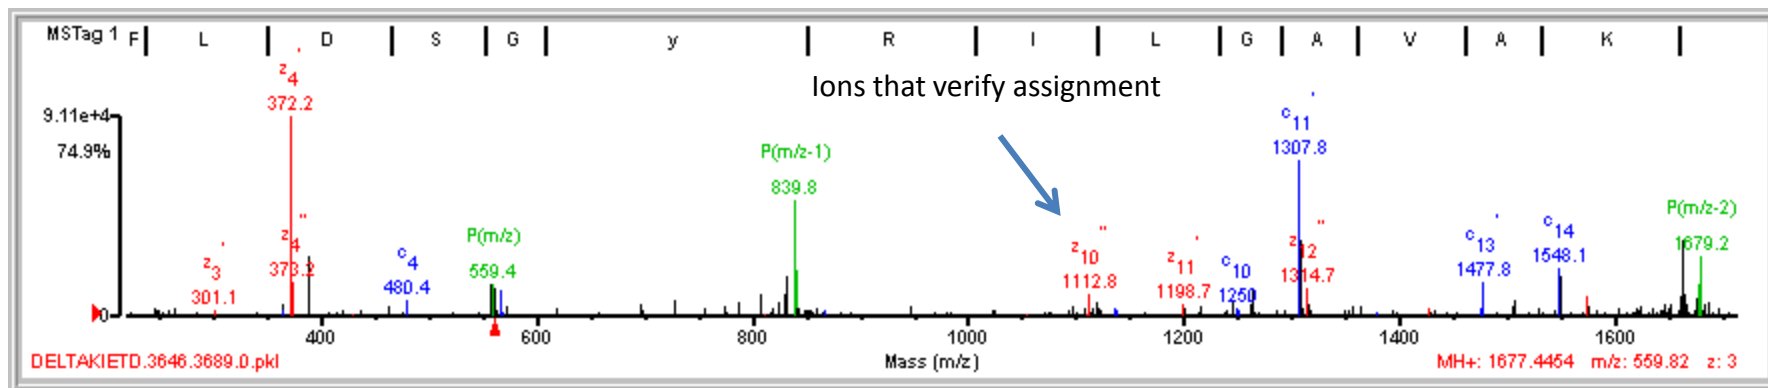

| Rank | Score | SPI (%) | BCS | # Unmatched Ions | Variable sites | Sequence                              | MH <sup>+</sup> Calculated (Da) | MH <sup>+</sup> Error (Da) | MH <sup>+</sup> Error (ppm) | Protein MW/pI (Da) | Species      | Accession #             | MS-Digest Index #     | Protein Name              |
|------|-------|---------|-----|------------------|----------------|---------------------------------------|---------------------------------|----------------------------|-----------------------------|--------------------|--------------|-------------------------|-----------------------|---------------------------|
| 1    | 12.73 | 86.2    | 11  | 8/25             | Y822y          | (K) S/P/L/D S G y R I\L\G A/V\A\R (V) | 1596.87                         | 80.5710                    | 360.5                       | 123800.0/5.50      | Homo sapiens | <a href="#">7669550</a> | <a href="#">11836</a> | vinculin isoform meta-VCL |
| 1    | 12.73 | 86.2    | 11  | 8/25             | Y822y          | (K) S/P/L/D S G y R I\L\G A/V\A\R (V) | 1596.87                         | 80.5710                    | 360.5                       | 116723.0/5.83      | Homo sapiens | <a href="#">4507877</a> | <a href="#">12613</a> | vinculin isoform VCL      |

  

| Fragment-ion (m/z)      | 246.09 | 301.13           | 364.25 | 372.24           | 388.21         | 480.41         | 567.35         | 787.45                        | 1111.58           | 1112.78            | 1119.47 | 1136.82        | 1198.73           | 1215.55 | 1245.92 | 1249.98         | 1263.84 | 1306.87         | 1314.69            | 1426.78           | 1477.77           | 1506.14 | 1548.10         | 1575.00            | 1603.06 |
|-------------------------|--------|------------------|--------|------------------|----------------|----------------|----------------|-------------------------------|-------------------|--------------------|---------|----------------|-------------------|---------|---------|-----------------|---------|-----------------|--------------------|-------------------|-------------------|---------|-----------------|--------------------|---------|
| Frac. Inten. (% of TIC) | 1.49   | 1.34             | 1.32   | 20.11            | 4.38           | 1.43           | 2.28           | 1.80                          | 1.16              | 2.35               | 2.34    | 1.29           | 2.12              | 1.17    | 1.34    | 1.11            | 3.02    | 26.65           | 4.62               | 1.38              | 2.61              | 1.88    | 9.67            | 1.95               | 1.22    |
| Rel. Inten. (% of BP)   | 5.59   | 5.02             | 4.94   | 75.47            | 16.43          | 5.35           | 8.55           | 6.74                          | 4.36              | 8.81               | 8.79    | 4.83           | 7.94              | 4.40    | 5.02    | 4.16            | 11.31   | 100.00          | 17.34              | 5.16              | 9.80              | 7.04    | 36.27           | 7.34               | 4.58    |
| Score                   | -0.06  | 1.00             | -0.05  | 1.00             | 0.25           | 1.00           | 1.00           | 1.00                          | 1.00              | 0.25               | -0.09   | 1.00           | 1.00              | -0.04   | -0.05   | 1.00            | -0.11   | 1.00            | 0.25               | 1.00              | 0.25              | -0.07   | 1.00            | 0.25               | -0.05   |
| Ion-type                |        | z <sub>3</sub> ' |        | z <sub>4</sub> ' | y <sub>4</sub> | c <sub>4</sub> | c <sub>5</sub> | z <sub>14</sub> <sup>++</sup> | z <sub>10</sub> ' | z <sub>10</sub> '' |         | c <sub>9</sub> | z <sub>11</sub> ' |         |         | c <sub>10</sub> |         | c <sub>11</sub> | z <sub>12</sub> '' | z <sub>13</sub> ' | c <sub>13</sub> ' |         | c <sub>14</sub> | z <sub>14</sub> '' |         |
| Delta Da                |        | -0.07            |        | 0.00             | -0.05          | 0.16           | 0.07           | 0.05                          | 0.00              | 0.19               |         | 0.31           | 0.12              |         |         | 0.38            |         | 0.25            | 0.04               | 0.06              | 0.04              |         | 0.34            | 0.20               |         |

# Peak 253

Ions that verify assignment

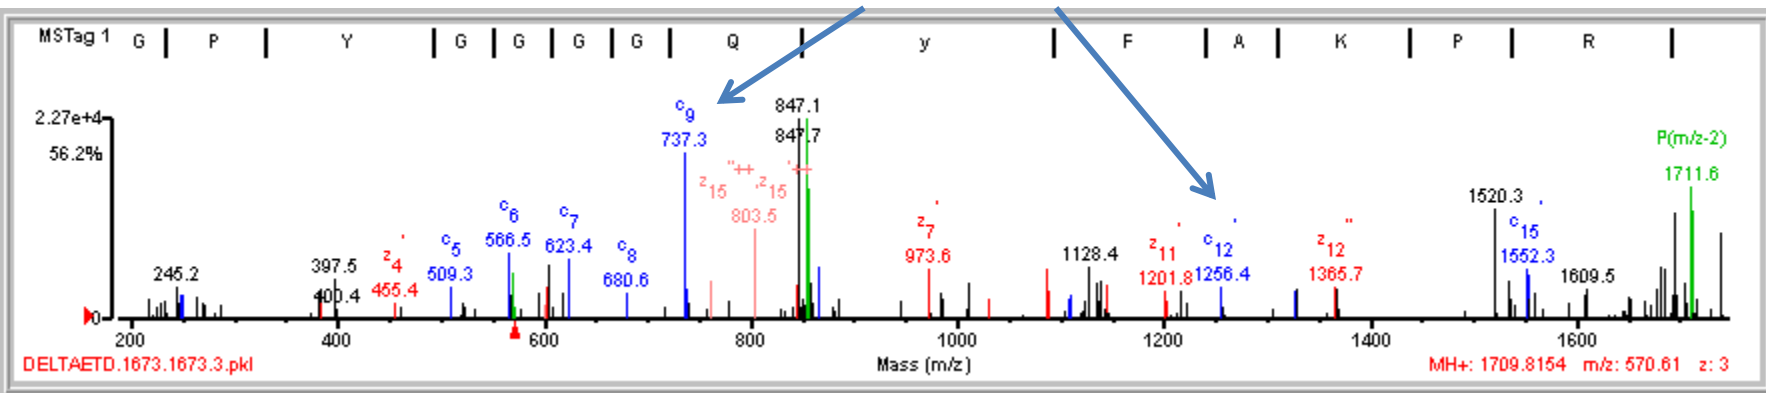

| Rank | Score | SPI (%) | BCS | # Unmatched Ions | Variable sites | Sequence                                    | MH <sup>+</sup> Calculated (Da) | MH <sup>+</sup> Error (Da) | MH <sup>+</sup> Error (ppm) | Protein MW/pl (Da) | Species      | Accession #               | MS-Digest Index #     | Protein Name                                                     |
|------|-------|---------|-----|------------------|----------------|---------------------------------------------|---------------------------------|----------------------------|-----------------------------|--------------------|--------------|---------------------------|-----------------------|------------------------------------------------------------------|
| 1    | 9.47  | 78.5    | 10  | 6/20             | Y295y          | (R) S/S/G P Y I G/G I G I Q\Y F\A\K P\R (N) | 1628.78                         | 81.0339                    | 624.4                       | 32380.6/8.97       | Homo sapiens | <a href="#">88953883</a>  | <a href="#">231</a>   | PREDICTED: similar to heterogeneous nuclear ribonucleoprotein A1 |
| 1    | 9.47  | 78.5    | 10  | 6/20             | Y295y          | (R) S/S/G P Y I G/G I G I Q\Y F\A\K P\R (N) | 1628.78                         | 81.0339                    | 624.4                       | 32399.6/9.09       | Homo sapiens | <a href="#">88958985</a>  | <a href="#">7957</a>  | PREDICTED: similar to heterogeneous nuclear ribonucleoprotein A1 |
| 1    | 9.47  | 78.5    | 10  | 6/20             | Y295y          | (R) S/S/G P Y I G/G I G I Q\Y F\A\K P\R (N) | 1628.78                         | 81.0339                    | 624.4                       | 34196.4/9.27       | Homo sapiens | <a href="#">4504445</a>   | <a href="#">14660</a> | heterogeneous nuclear ribonucleoprotein A1 isoform a             |
| 1    | 9.47  | 78.5    | 10  | 6/20             | Y295y          | (R) S/S/G P Y I G/G I G I Q\Y F\A\K P\R (N) | 1628.78                         | 81.0339                    | 624.4                       | 32399.6/9.09       | Homo sapiens | <a href="#">169164476</a> | <a href="#">34130</a> | PREDICTED: similar to heterogeneous nuclear ribonucleoprotein A1 |
| 1    | 9.47  | 78.5    | 10  | 6/20             | Y347y          | (R) S/S/G P Y I G/G I G I Q\Y F\A\K P\R (N) | 1628.78                         | 81.0339                    | 624.4                       | 38746.8/9.17       | Homo sapiens | <a href="#">14043070</a>  | <a href="#">35773</a> | heterogeneous nuclear ribonucleoprotein A1 isoform b             |

| Fragment-ion (m/z)      | 232.02 | 248.88 | 509.28         | 604.51 | 623.36         | 737.30         | 803.49                        | 865.67          | 973.64         | 1087.75        | 1128.45 | 1134.90 | 1145.57         | 1201.83         | 1255.45         | 1327.77         | 1520.33         | 1535.27         | 1552.26 | 1608.16         |
|-------------------------|--------|--------|----------------|--------|----------------|----------------|-------------------------------|-----------------|----------------|----------------|---------|---------|-----------------|-----------------|-----------------|-----------------|-----------------|-----------------|---------|-----------------|
| Frac. Inten. (% of TIC) | 3.02   | 3.26   | 2.70           | 3.53   | 5.40           | 14.01          | 8.97                          | 3.42            | 4.23           | 5.13           | 3.46    | 4.31    | 3.13            | 3.37            | 4.81            | 3.91            | 7.14            | 4.13            | 8.18    | 3.90            |
| Rel. Inten. (% of BP)   | 21.55  | 23.28  | 19.29          | 25.16  | 38.51          | 100.00         | 64.00                         | 24.40           | 30.19          | 36.59          | 24.69   | 30.72   | 22.34           | 24.02           | 34.33           | 27.91           | 50.98           | 29.46           | 58.40   | 27.83           |
| Score                   | -0.22  | -0.23  | 1.00           | -0.25  | 1.00           | 1.00           | 1.00                          | 1.00            | 1.00           | 1.00           | -0.25   | -0.31   | 0.25            | 1.00            | 1.00            | 0.25            | 0.25            | 0.25            | 1.00    | -0.28           |
| Ion-type                |        |        | c <sub>5</sub> |        | c <sub>7</sub> | c <sub>9</sub> | z <sup>++</sup> <sub>15</sub> | c <sub>10</sub> | z <sub>7</sub> | z <sub>9</sub> |         |         | z <sub>10</sub> | z <sub>11</sub> | c <sub>12</sub> | c <sub>13</sub> | z <sub>14</sub> | y <sub>14</sub> |         | c <sub>15</sub> |
| Delta Da                |        |        | 0.04           |        | 0.08           | -0.02          | 0.14                          | 0.29            | 0.20           | 0.27           |         |         | 0.06            | 0.30            | -0.03           | 0.25            | 0.66            | 0.59            |         | 0.60            |

# Peak 254

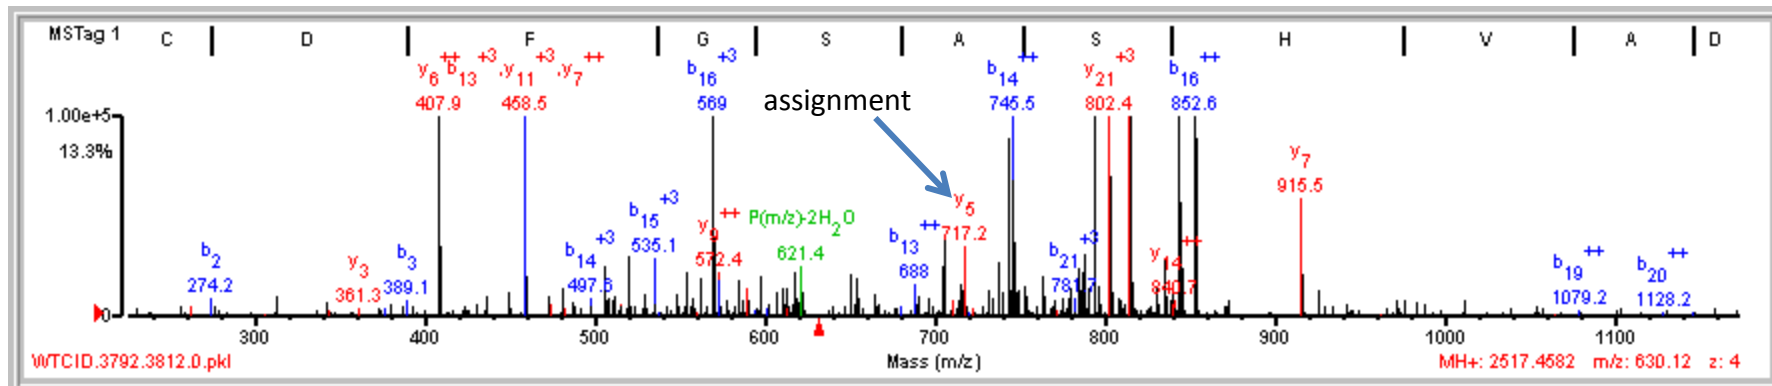

| Rank                    | Score            | SPI (%)            | BCS    | # Unmatched Ions | Variable sites     | Sequence                                            | MH <sup>+</sup> Calculated (Da) | MH <sup>+</sup> Error (Da) | MH <sup>+</sup> Error (ppm) | Protein MW/pI (Da) | Species                             | Accession #              | MS-Digest Index #     | Protein Name                          |        |                                     |                                  |                   |                    |                |        |                   |                                     |                   |                |
|-------------------------|------------------|--------------------|--------|------------------|--------------------|-----------------------------------------------------|---------------------------------|----------------------------|-----------------------------|--------------------|-------------------------------------|--------------------------|-----------------------|---------------------------------------|--------|-------------------------------------|----------------------------------|-------------------|--------------------|----------------|--------|-------------------|-------------------------------------|-------------------|----------------|
| 1                       | 14.54            | 90.3               | 6      | 8/25             | Y849y              | (K) L/C D F G S A S/H V A/D N/D/I/T/P/Y L V S R (F) | 2437.15                         | 80.3129                    | 137.7                       | 116987.4/10.26     | Homo sapiens                        | <a href="#">89276756</a> | <a href="#">18658</a> | serine/threonine-protein kinase PRP4K |        |                                     |                                  |                   |                    |                |        |                   |                                     |                   |                |
| Fragment-ion (m/z)      | 407.88           | 458.48             | 505.90 | 519.95           | 535.06             | 569.00                                              | 572.38                          | 617.39                     | 704.46                      | 717.19             | 737.01                              | 743.03                   | 745.50                | 784.46                                | 788.11 | 793.54                              | 795.97                           | 801.89            | 802.41             | 814.50         | 835.06 | 839.72            | 843.80                              | 852.59            | 915.53         |
| Frac. Inten. (% of TIC) | 21.11            | 9.84               | 0.71   | 0.74             | 0.71               | 13.87                                               | 0.97                            | 0.71                       | 1.33                        | 1.12               | 0.86                                | 2.99                     | 6.20                  | 1.00                                  | 0.96   | 2.54                                | 0.91                             | 1.35              | 6.05               | 6.69           | 1.31   | 0.72              | 4.57                                | 11.15             | 1.60           |
| Rel. Inten. (% of BP)   | 100.00           | 46.61              | 3.38   | 3.51             | 3.34               | 65.70                                               | 4.60                            | 3.35                       | 6.29                        | 5.33               | 4.08                                | 14.16                    | 29.39                 | 4.72                                  | 4.53   | 12.01                               | 4.31                             | 6.38              | 28.67              | 31.68          | 6.20   | 3.41              | 21.65                               | 52.83             | 7.60           |
| Score                   | 1.00             | 1.00               | -0.03  | -0.04            | 1.00               | 1.00                                                | 1.00                            | -0.03                      | -0.06                       | 1.00               | 0.50                                | -0.14                    | 1.00                  | -0.05                                 | -0.05  | 0.50                                | 0.50                             | 1.00              | 1.00               | 1.00           | -0.06  | 1.00              | 0.50                                | 1.00              | 1.00           |
| Ion-type                | y <sup>++6</sup> | y <sup>++7</sup>   |        |                  | b <sup>+++15</sup> | b <sup>+++16</sup>                                  | y <sup>++9</sup>                |                            |                             | y <sub>5</sub>     | b <sup>++14</sup> -H <sub>2</sub> O |                          | b <sup>++14</sup>     |                                       |        | b <sup>++15</sup> -H <sub>2</sub> O | y <sub>6</sub> -H <sub>2</sub> O | b <sup>++15</sup> | b <sup>++15</sup>  | y <sub>6</sub> |        | y <sup>++14</sup> | b <sup>++16</sup> -H <sub>2</sub> O | b <sup>++16</sup> | y <sub>7</sub> |
| Delta Da                | 0.18             | 0.26               |        |                  | 0.16               | 0.42                                                | 0.10                            |                            |                             | -0.14              | 0.71                                |                          | 0.20                  |                                       |        | 0.70                                | -0.41                            | 0.04              | 0.56               | 0.11           |        | -0.67             | 0.44                                | 0.22              | 0.10           |
|                         |                  | y <sup>+++11</sup> |        |                  |                    |                                                     |                                 |                            |                             |                    |                                     |                          |                       |                                       |        |                                     |                                  |                   | y <sup>+++21</sup> |                |        |                   |                                     |                   |                |









# Peak 258

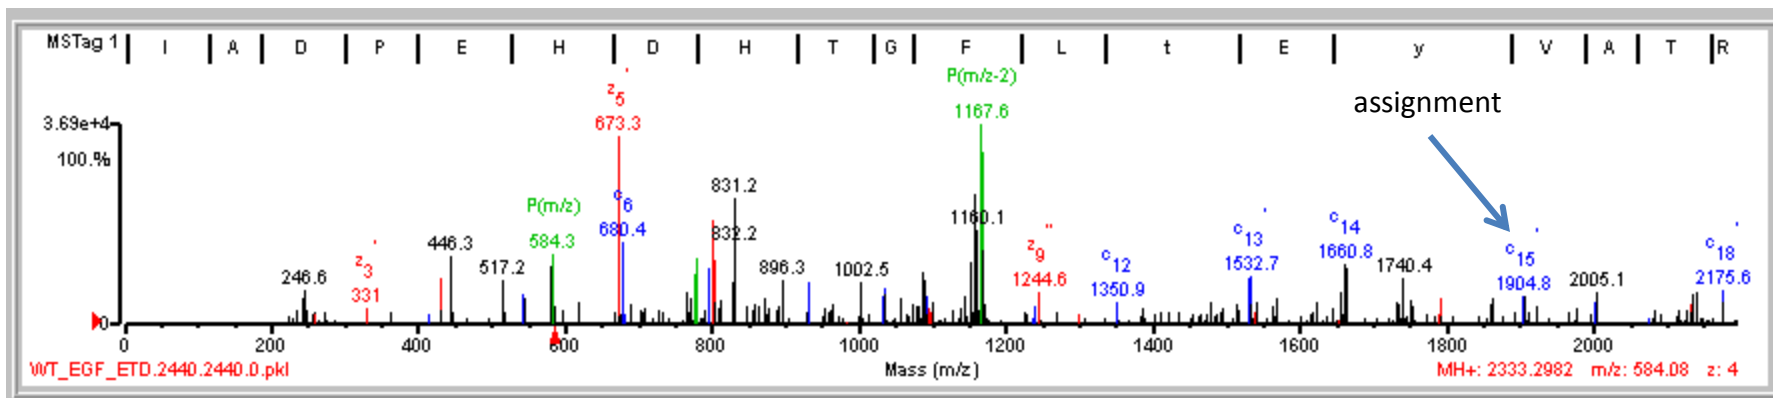

| Rank | Score | SPI (%) | BCS | # Unmatched Ions | Variable sites | Sequence                                      | MH <sup>+</sup> Calculated (Da) | MH <sup>+</sup> Error (Da) | MH <sup>+</sup> Error (ppm) | Protein MW/pl (Da) | Species      | Accession #               | MS-Digest Index #     | Protein Name                                 |
|------|-------|---------|-----|------------------|----------------|-----------------------------------------------|---------------------------------|----------------------------|-----------------------------|--------------------|--------------|---------------------------|-----------------------|----------------------------------------------|
| 1    | 15.99 | 87.3    | 10  | 4/24             | T202t Y204y    | (R) I A D P E H D H T G F L t E Y V A T R (W) | 2172.04                         | 161.2625                   | 570.0                       | 43135.8/6.28       | Homo sapiens | <a href="#">91718899</a>  | <a href="#">1012</a>  | mitogen-activated protein kinase 3 isoform 1 |
| 1    | 15.99 | 87.3    | 10  | 4/24             | T202t Y204y    | (R) I A D P E H D H T G F L t E Y V A T R (W) | 2172.04                         | 161.2625                   | 570.0                       | 40088.2/7.16       | Homo sapiens | <a href="#">91718897</a>  | <a href="#">3088</a>  | mitogen-activated protein kinase 3 isoform 2 |
| 1    | 15.99 | 87.3    | 10  | 4/24             | T202t Y204y    | (R) I A D P E H D H T G F L t E Y V A T R (W) | 2172.04                         | 161.2625                   | 570.0                       | 38275.1/5.80       | Homo sapiens | <a href="#">158138507</a> | <a href="#">36296</a> | mitogen-activated protein kinase 3 isoform 3 |

| Fragment-ion (m/z)      | 430.36         | 446.33         | 517.16                       | 543.33         | 673.30         | 680.36         | 795.65         | 802.62         | 828.15                        | 831.23                        | 896.26                        | 1002.47                       | 1034.62        | 1088.20                       | 1090.91         | 1531.74         | 1532.69         | 1660.84         | 1662.74 | 1740.41 | 1751.95 | 1860.79 | 1903.91         | 2175.64         |
|-------------------------|----------------|----------------|------------------------------|----------------|----------------|----------------|----------------|----------------|-------------------------------|-------------------------------|-------------------------------|-------------------------------|----------------|-------------------------------|-----------------|-----------------|-----------------|-----------------|---------|---------|---------|---------|-----------------|-----------------|
| Frac. Inten. (% of TIC) | 3.61           | 3.73           | 2.62                         | 3.79           | 12.61          | 4.30           | 2.74           | 9.73           | 2.24                          | 9.95                          | 2.08                          | 1.99                          | 3.14           | 4.45                          | 3.87            | 2.16            | 4.37            | 4.19            | 6.20    | 2.15    | 2.32    | 2.04    | 2.19            | 3.53            |
| Rel. Inten. (% of BP)   | 28.60          | 29.58          | 20.74                        | 30.06          | 100.00         | 34.08          | 21.73          | 77.10          | 17.74                         | 78.85                         | 16.50                         | 15.79                         | 24.86          | 35.25                         | 30.71           | 17.10           | 34.64           | 33.25           | 49.18   | 17.05   | 18.39   | 16.18   | 17.40           | 28.00           |
| Score                   | 1.00           | 0.25           | 1.00                         | 1.00           | 1.00           | 1.00           | 1.00           | 1.00           | 0.25                          | 1.00                          | 1.00                          | 1.00                          | 0.25           | 1.00                          | 1.00            | 1.00            | 0.25            | 1.00            | -0.49   | -0.17   | -0.18   | -0.16   | 1.00            | 1.00            |
| Ion-type                | Z <sub>4</sub> | Y <sub>4</sub> | C <sup>++</sup> <sub>9</sub> | C <sub>5</sub> | Z <sub>5</sub> | C <sub>6</sub> | C <sub>7</sub> | Z <sub>6</sub> | Z <sup>++</sup> <sub>13</sub> | C <sup>++</sup> <sub>14</sub> | Z <sup>++</sup> <sub>14</sub> | C <sup>++</sup> <sub>16</sub> | C <sub>9</sub> | C <sup>++</sup> <sub>18</sub> | C <sub>10</sub> | C <sub>13</sub> | C <sub>13</sub> | C <sub>14</sub> |         |         |         |         | C <sub>15</sub> | C <sub>18</sub> |
| Delta Da                | 0.11           | 0.06           | -0.08                        | 0.05           | 0.02           | 0.02           | 0.29           | 0.29           | 0.32                          | 0.38                          | 0.40                          | 0.57                          | 0.14           | 0.25                          | 0.42            | 0.08            | 0.02            | 0.14            |         |         |         |         | 0.18            | 0.76            |

# Peak 259

Ions that verify assignment

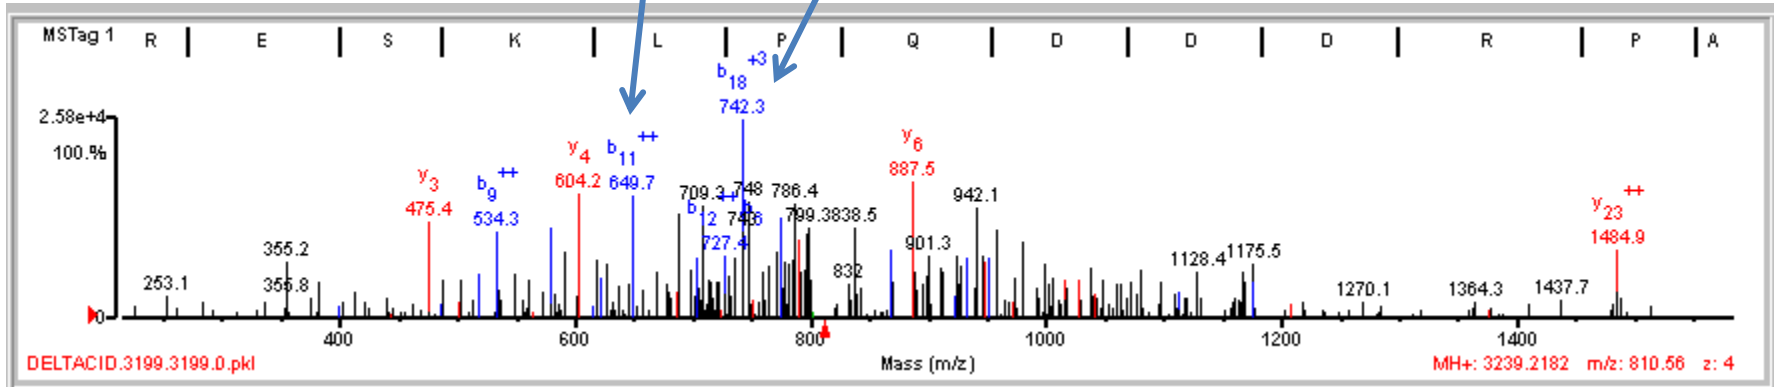

| Rank                    | Score          | SPI (%)                      | BCS                            | # Unmatched Ions | Variable sites                | Sequence                                                  | MH <sup>+</sup> Calculated (Da)  | MH <sup>+</sup> Error (Da) | MH <sup>+</sup> Error (ppm)    | Protein MW/pl (Da) | Species                        | Accession #               | MS-Digest Index #              | Protein Name                                       |                |                |                                |                                  |                |        |        |                                 |         |                                  |
|-------------------------|----------------|------------------------------|--------------------------------|------------------|-------------------------------|-----------------------------------------------------------|----------------------------------|----------------------------|--------------------------------|--------------------|--------------------------------|---------------------------|--------------------------------|----------------------------------------------------|----------------|----------------|--------------------------------|----------------------------------|----------------|--------|--------|---------------------------------|---------|----------------------------------|
| 1                       | 13.04          | 74.0                         | 11                             | 7/24             | Y336y                         | (R) L R/E S K L P Q D\D D\R\P\A D\E y D\Q/P/W/E/W N R (V) | 3158.46                          | 80.7619                    | 245.6                          | 55042.5/9.10       | Homo sapiens                   | <a href="#">106879210</a> | <a href="#">23534</a>          | Src homology 2 domain containing adaptor protein B |                |                |                                |                                  |                |        |        |                                 |         |                                  |
| Fragment-ion (m/z)      | 475.36         | 534.27                       | 579.83                         | 604.19           | 649.72                        | 688.44                                                    | 709.30                           | 727.35                     | 742.34                         | 748.01             | 775.81                         | 782.19                    | 785.62                         | 790.35                                             | 796.08         | 838.54         | 868.98                         | 887.51                           | 911.07         | 942.10 | 946.14 | 998.56                          | 1175.53 | 1484.93                          |
| Frac. Inten. (% of TIC) | 3.49           | 3.85                         | 3.62                           | 4.19             | 4.10                          | 3.48                                                      | 4.10                             | 3.28                       | 9.59                           | 4.36               | 4.35                           | 3.31                      | 0.18                           | 6.51                                               | 4.55           | 3.89           | 3.53                           | 7.77                             | 3.76           | 3.67   | 4.03   | 3.84                            | 3.40    | 3.17                             |
| Rel. Inten. (% of BP)   | 36.34          | 40.16                        | 37.72                          | 43.65            | 42.77                         | 36.33                                                     | 42.73                            | 34.18                      | 100.00                         | 45.48              | 45.34                          | 34.46                     | 1.83                           | 67.84                                              | 47.44          | 40.51          | 36.76                          | 81.04                            | 39.20          | 38.28  | 42.01  | 40.04                           | 35.42   | 33.06                            |
| Score                   | 1.00           | 1.00                         | 1.00                           | 1.00             | 1.00                          | -0.36                                                     | 0.50                             | 1.00                       | 1.00                           | -0.45              | 1.00                           | -0.34                     | 1.50                           | 1.00                                               | 0.25           | 1.00           | 1.00                           | 1.00                             | -0.39          | -0.38  | -0.42  | 0.50                            | -0.35   | 1.00                             |
| Ion-type                | y <sub>3</sub> | b <sup>++</sup> <sub>9</sub> | b <sup>+++</sup> <sub>15</sub> | y <sub>4</sub>   | b <sup>++</sup> <sub>11</sub> |                                                           | b <sub>9</sub> -H <sub>2</sub> O | b <sub>9</sub>             | b <sup>+++</sup> <sub>18</sub> |                    | b <sup>+++</sup> <sub>18</sub> |                           | b <sup>+++</sup> <sub>13</sub> | sty                                                | y <sub>5</sub> | a <sub>7</sub> | y <sup>+++</sup> <sub>19</sub> | b <sup>+++</sup> <sub>15</sub>   | y <sub>6</sub> |        |        | y <sub>7</sub> -NH <sub>3</sub> |         | y <sup>+++</sup> <sub>23</sub>   |
| Delta Da                | 0.12           | -0.03                        | 0.21                           | -0.09            | 0.40                          |                                                           | -0.14                            |                            | 0.35                           |                    |                                |                           | -0.09                          | -0.25                                              | -0.01          | -0.42          | 0.54                           | 0.05                             | 0.09           |        |        | 0.11                            |         | -0.19                            |
|                         |                |                              |                                |                  |                               |                                                           | b <sup>++</sup> <sub>12</sub>    |                            |                                |                    |                                |                           |                                |                                                    |                |                |                                | y <sub>6</sub> -H <sub>2</sub> O |                |        |        |                                 |         | y <sub>10</sub> -NH <sub>3</sub> |
|                         |                |                              |                                |                  |                               |                                                           | -0.02                            |                            |                                |                    |                                |                           |                                |                                                    |                |                |                                | -0.43                            |                |        |        |                                 |         | -0.62                            |

# Peak 260

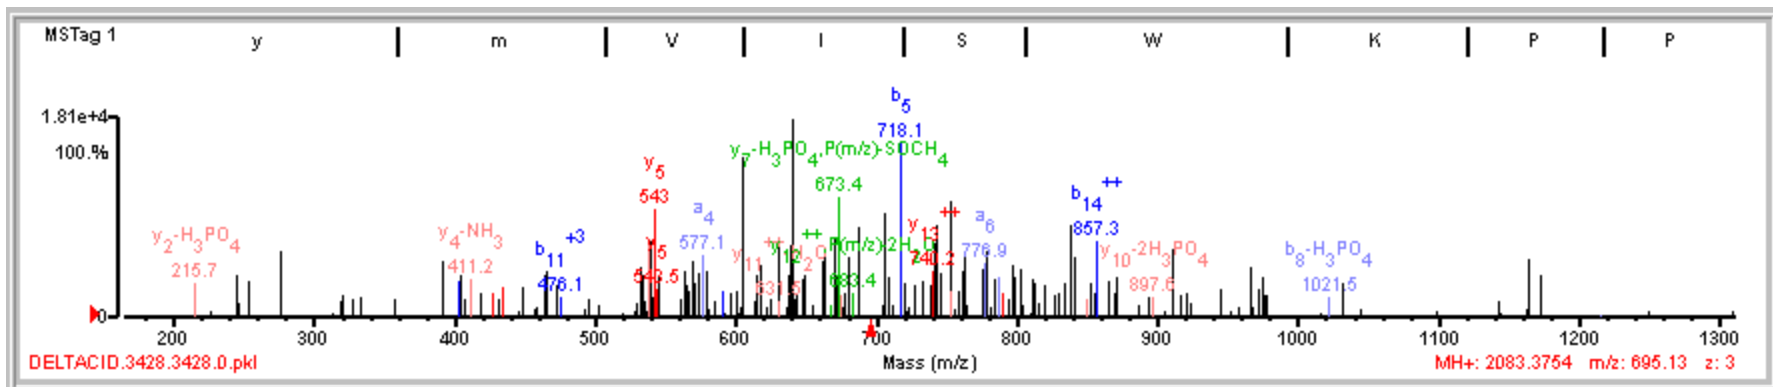

| Scan | Retention (min) | Intensity (%) | Charge | Mod | Protein | Sequence        | Mass (Da)                                      | Intensity (%) | Intensity (BP) | Score  | Species        | Accession 1  | Accession 2               | Protein Name         |                       |
|------|-----------------|---------------|--------|-----|---------|-----------------|------------------------------------------------|---------------|----------------|--------|----------------|--------------|---------------------------|----------------------|-----------------------|
| 1    | 7.75            | 100.0         | 4      | 0/8 | M10432m | Y10431y S10445s | (K)D y m V I \ S / W K P P L D / D G G s K (I) | 1907.92       | 175.4547       | -227.0 | 2993027.6/6.35 | Homo sapiens | <a href="#">110349715</a> | <a href="#">6641</a> | titin isoform N2-B    |
| 1    | 7.75            | 100.0         | 4      | 0/8 | M10557m | Y10556y S10570s | (K)D y m V I \ S / W K P P L D / D G G s K (I) | 1907.92       | 175.4547       | -227.0 | 3006843.3/6.36 | Homo sapiens | <a href="#">110349713</a> | <a href="#">6945</a> | titin isoform novex-1 |
| 1    | 7.75            | 100.0         | 4      | 0/8 | M10624m | Y10623y S10637s | (K)D y m V I \ S / W K P P L D / D G G s K (I) | 1907.92       | 175.4547       | -227.0 | 3014045.9/6.31 | Homo sapiens | <a href="#">110349717</a> | <a href="#">7361</a> | titin isoform novex-2 |
| 1    | 7.75            | 100.0         | 4      | 0/8 | M16929m | Y16928y S16942s | (K)D y m V I \ S / W K P P L D / D G G s K (I) | 1907.92       | 175.4547       | -227.0 | 3713692.0/6.16 | Homo sapiens | <a href="#">110349719</a> | <a href="#">7772</a> | titin isoform N2-A    |

| Fragment-ion (m/z)      | 543.04         | 605.89         | 640.73                          | 673.44 | 718.13         | 740.24                        | 752.76                           | 776.92         |
|-------------------------|----------------|----------------|---------------------------------|--------|----------------|-------------------------------|----------------------------------|----------------|
| Frac. Inten. (% of TIC) | 12.49          | 14.38          | 17.90                           | 0.41   | 15.60          | 11.99                         | 12.91                            | 14.32          |
| Rel. Inten. (% of BP)   | 69.78          | 80.35          | 100.00                          | 2.30   | 87.14          | 67.00                         | 72.11                            | 79.99          |
| Score                   | 1.00           | 1.00           | 1.00                            | 2.00   | 1.00           | 1.00                          | 0.50                             | 0.25           |
| Ion-type                | y <sub>5</sub> | b <sub>4</sub> | y <sup>++</sup> <sub>11</sub>   | m      | b <sub>5</sub> | y <sup>++</sup> <sub>13</sub> | y <sub>7</sub> -H <sub>2</sub> O | a <sub>6</sub> |
| Delta Da                | -0.14          | 0.72           | 0.44                            | -0.51  | -0.12          | -0.11                         | -0.52                            | -0.37          |
|                         |                |                | y <sub>6</sub> -NH <sub>3</sub> |        |                |                               |                                  |                |
|                         |                |                | -0.45                           |        |                |                               |                                  |                |



# Peak 262

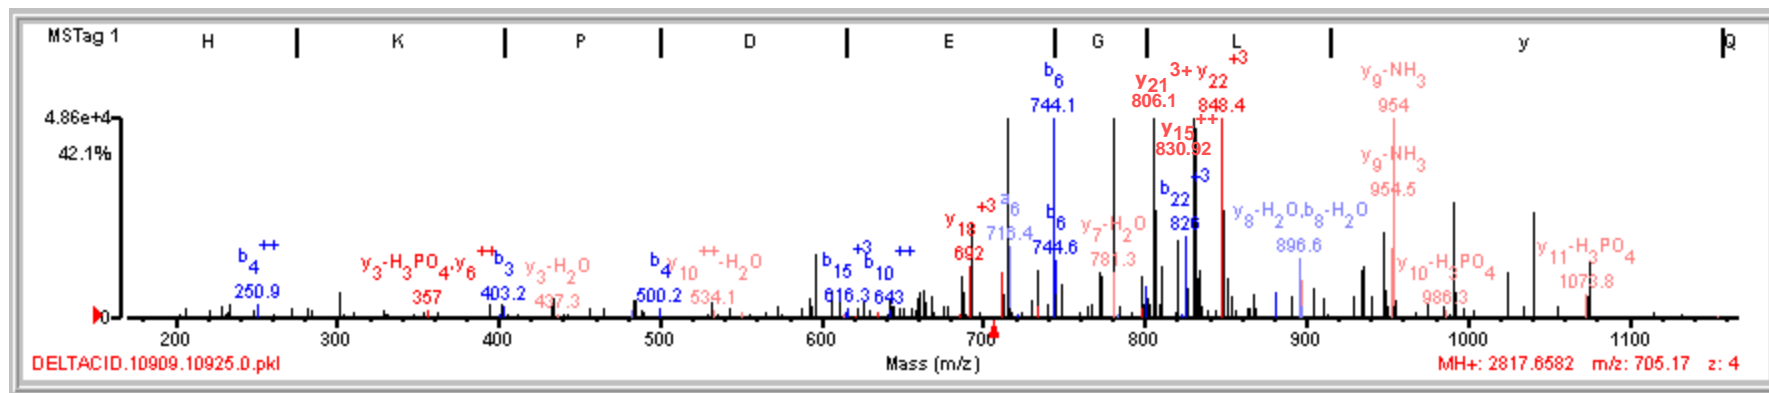

| Rank                    | Score                            | SPI (%) | BCS                            | # Unmatched Ions | # Variable sites | Sequence                                              | MH <sup>+</sup> Calculated (Da) | MH <sup>+</sup> Error (Da)       | MH <sup>+</sup> Error (ppm) | Protein MW/pl (Da) | Species                        | Accession #                                      | MS-Digest Index #              | Protein Name                    |        |                                |                                 |        |        |                                 |                                 |        |         |
|-------------------------|----------------------------------|---------|--------------------------------|------------------|------------------|-------------------------------------------------------|---------------------------------|----------------------------------|-----------------------------|--------------------|--------------------------------|--------------------------------------------------|--------------------------------|---------------------------------|--------|--------------------------------|---------------------------------|--------|--------|---------------------------------|---------------------------------|--------|---------|
| 1                       | 12.18                            | 83.7    | 8                              | 6/23             | Y115y S129s (R)  | H H/K/P D E I G L y/Q C E A S L G D/S/G S I I s R (T) | 2656.24                         | 161.4162                         | 526.5                       | 158457.4/6.32      | Homo sapiens                   | <a href="#">110431348</a>                        | <a href="#">23088</a>          | deleted in colorectal carcinoma |        |                                |                                 |        |        |                                 |                                 |        |         |
| Fragment-ion (m/z)      | 596.64                           | 687.27  | 692.04                         | 712.44           | 715.78           | 743.83                                                | 744.09                          | 780.69                           | 798.69                      | 800.91             | 806.09                         | 820.70                                           | 825.98                         | 830.92                          | 834.95 | 848.45                         | 896.65                          | 934.88 | 948.83 | 953.68                          | 953.96                          | 991.34 | 1040.90 |
| Frac. Inten. (% of TIC) | 1.22                             | 1.39    | 2.82                           | 1.35             | 8.48             | 1.79                                                  | 5.52                            | 9.66                             | 1.29                        | 1.59               | 11.28                          | 1.48                                             | 2.13                           | 15.16                           | 1.35   | 7.89                           | 2.11                            | 3.01   | 2.41   | 1.33                            | 8.62                            | 5.77   | 2.36    |
| Rel. Inten. (% of BP)   | 8.06                             | 9.16    | 18.57                          | 8.90             | 55.93            | 11.81                                                 | 36.39                           | 63.72                            | 8.49                        | 10.49              | 74.39                          | 9.76                                             | 14.03                          | 100.00                          | 8.90   | 52.05                          | 13.90                           | 19.85  | 15.88  | 8.77                            | 56.87                           | 38.04  | 15.59   |
| Score                   | 0.50                             | -0.09   | 1.00                           | 1.00             | 0.25             | 1.00                                                  | 1.00                            | 0.50                             | 1.00                        | 1.00               | 1.00                           | 0.50                                             | 1.00                           | 1.00                            | -0.09  | 1.00                           | 0.50                            | -0.20  | -0.16  | 0.50                            | 0.50                            | -0.38  | -0.16   |
| Ion-type                | b <sub>5</sub> -H <sub>2</sub> O |         | y <sup>+++</sup> <sub>18</sub> | y <sub>6</sub>   | a <sub>6</sub>   | b <sub>6</sub>                                        | b <sub>6</sub>                  | y <sub>7</sub> -H <sub>2</sub> O | y <sub>7</sub>              | b <sub>7</sub>     | y <sup>+++</sup> <sub>21</sub> | y <sup>+++</sup> <sub>15</sub> -H <sub>2</sub> O | b <sup>+++</sup> <sub>22</sub> | y <sup>++</sup> <sub>15</sub>   |        | y <sup>+++</sup> <sub>22</sub> | b <sub>8</sub> -NH <sub>3</sub> |        |        | y <sub>9</sub> -NH <sub>3</sub> | y <sub>9</sub> -NH <sub>3</sub> |        |         |
| Delta Da                | -0.65                            |         | 0.42                           | 0.10             | -0.57            | -0.51                                                 | -0.25                           | -0.67                            | -0.68                       | -0.45              | 0.76                           | -0.65                                            | 0.29                           | 0.56                            |        | 0.43                           | -0.77                           |        |        | -0.71                           | -0.43                           |        |         |

# Peak 263

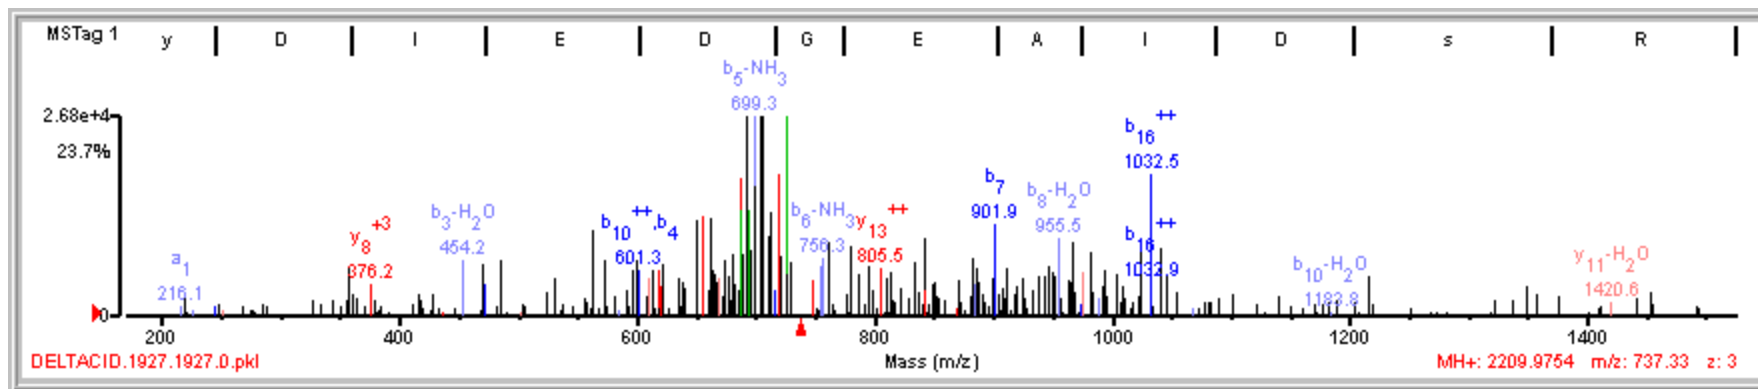

| Rank                    | Score          | SPI (%)                       | BCS    | # Unmatched Ions | Variable sites              | Sequence                                     | MH <sup>+</sup> Calculated (Da) | MH <sup>+</sup> Error (Da) | MH <sup>+</sup> Error (ppm)      | Protein MW/pI (Da) | Species                                         | Accession #               | MS-Digest Index #             | Protein Name                                    |                |        |                |                                  |                               |
|-------------------------|----------------|-------------------------------|--------|------------------|-----------------------------|----------------------------------------------|---------------------------------|----------------------------|----------------------------------|--------------------|-------------------------------------------------|---------------------------|-------------------------------|-------------------------------------------------|----------------|--------|----------------|----------------------------------|-------------------------------|
| 1                       | 11.32          | 83.8                          | 6      | 5/19             | M1300m Y1286y S1296s S1298s | (K) Y D I E \D G/E \A I D s/R/s L m I \K (T) | 1954.94                         | 255.0328                   | -389.6                           | 180579.7/5.43      | Homo sapiens                                    | <a href="#">116089337</a> | <a href="#">13439</a>         | IQ motif containing GTPase activating protein 2 |                |        |                |                                  |                               |
| Fragment-ion (m/z)      | 600.40         | 649.84                        | 655.29 | 661.87           | 666.02                      | 687.13                                       | 692.92                          | 694.65                     | 698.76                           | 705.19             | 711.56                                          | 713.67                    | 719.62                        | 755.28                                          | 842.88         | 886.86 | 901.87         | 955.46                           | 1032.50                       |
| Frac. Inten. (% of TIC) | 3.38           | 4.60                          | 4.08   | 2.88             | 2.86                        | 9.05                                         | 0.30                            | 0.17                       | 37.92                            | 0.88               | 3.23                                            | 3.10                      | 6.80                          | 3.25                                            | 3.25           | 2.77   | 2.75           | 2.88                             | 5.86                          |
| Rel. Inten. (% of BP)   | 8.92           | 12.12                         | 10.75  | 7.59             | 7.54                        | 23.87                                        | 0.78                            | 0.44                       | 100.00                           | 2.33               | 8.51                                            | 8.19                      | 17.92                         | 8.56                                            | 8.56           | 7.30   | 7.25           | 7.59                             | 15.46                         |
| Score                   | 1.00           | -0.12                         | 1.00   | -0.08            | -0.08                       | 1.00                                         |                                 | 1.00                       | 0.50                             | 1.50               | 0.50                                            | -0.08                     | 1.00                          | 0.50                                            | 1.00           | -0.07  | 1.00           | 0.50                             | 1.00                          |
| Ion-type                | b <sub>4</sub> | y <sup>++</sup> <sub>10</sub> |        |                  |                             | y <sub>5</sub>                               | st                              | m                          | b <sub>5</sub> -H <sub>2</sub> O | sty                | y <sup>++</sup> <sub>11</sub> -H <sub>2</sub> O |                           | y <sup>++</sup> <sub>11</sub> | b <sub>6</sub> -H <sub>2</sub> O                | y <sub>6</sub> |        | b <sub>7</sub> | b <sub>8</sub> -H <sub>2</sub> O | b <sup>++</sup> <sub>16</sub> |
| Delta Da                | -0.79          |                               | 0.01   |                  |                             | -0.18                                        |                                 | -0.30                      | 0.55                             | 0.23               | 0.76                                            |                           | -0.19                         | 0.05                                            | -0.54          |        | -0.41          | 0.15                             | -0.37                         |



# Peak 264

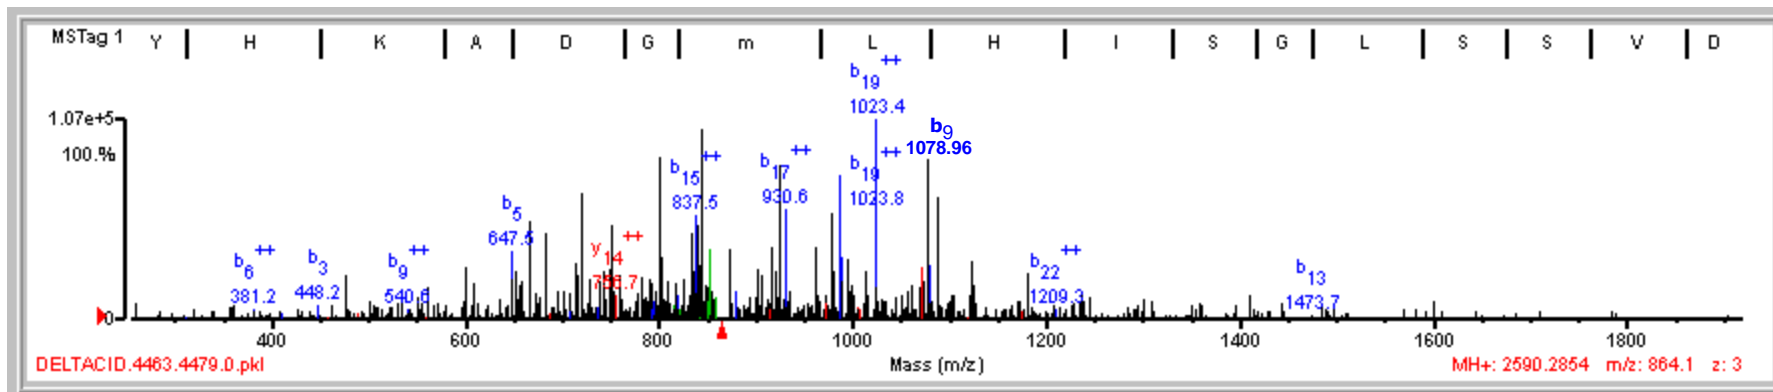

| Rank | Score | SPI (%) | BCS | # Unmatched Ions | Variable sites | Sequence                                                                | MH <sup>+</sup> Calculated (Da) | MH <sup>+</sup> Error (Da) | MH <sup>+</sup> Error (ppm) | Protein MW/pI (Da) | Species      | Accession #               | Digest Index #        | Protein Name                  |
|------|-------|---------|-----|------------------|----------------|-------------------------------------------------------------------------|---------------------------------|----------------------------|-----------------------------|--------------------|--------------|---------------------------|-----------------------|-------------------------------|
| 1    | 7.10  | 57.5    | 9   | 10/24            | M2600m Y2614y  | (R) F Y H / K A \ D G m L \ H I \ S G L S \ S V \ D \ A \ G A \ Y R (C) | 2495.21                         | 95.0718                    | -343.4                      | 312151.9/8.57      | Homo sapiens | <a href="#">139948432</a> | <a href="#">7221</a>  | adlican                       |
| 1    | 7.10  | 57.5    | 9   | 10/24            | M447m Y461y    | (R) F Y H / K A \ D G m L \ H I \ S G L S \ S V \ D \ A \ G A \ Y R (C) | 2495.21                         | 95.0718                    | -343.4                      | 74242.4/8.70       | Homo sapiens | <a href="#">169217394</a> | <a href="#">19630</a> | PREDICTED: similar to adlican |

  

| Fragment-ion (m/z)      | 647.47         | 665.99                        | 682.59                         | 715.37                          | 719.72 | 751.09 | 791.60         | 800.66                           | 833.93 | 837.46                        | 840.94 | 844.58 | 873.60 | 924.16                        | 930.61 | 963.33                                          | 979.41                          | 987.63                                          | 1014.85                       | 1023.38                       | 1072.37                                         | 1078.96                       | 1088.06 | 1123.33 |
|-------------------------|----------------|-------------------------------|--------------------------------|---------------------------------|--------|--------|----------------|----------------------------------|--------|-------------------------------|--------|--------|--------|-------------------------------|--------|-------------------------------------------------|---------------------------------|-------------------------------------------------|-------------------------------|-------------------------------|-------------------------------------------------|-------------------------------|---------|---------|
| Frac. Inten. (% of TIC) | 2.52           | 2.55                          | 3.12                           | 3.50                            | 4.52   | 4.55   | 2.69           | 9.14                             | 2.52   | 3.44                          | 3.93   | 8.11   | 2.54   | 6.85                          | 2.85   | 3.22                                            | 3.30                            | 6.60                                            | 2.19                          | 7.82                          | 2.05                                            | 5.67                          | 3.19    | 3.12    |
| Rel. Inten. (% of BP)   | 27.59          | 27.94                         | 34.17                          | 38.24                           | 49.48  | 49.72  | 29.39          | 100.00                           | 27.60  | 37.63                         | 43.00  | 88.67  | 27.77  | 74.93                         | 31.15  | 35.27                                           | 36.08                           | 72.14                                           | 23.92                         | 85.58                         | 22.48                                           | 62.06                         | 34.88   | 34.18   |
| Score                   | 1.00           | 1.00                          | -0.34                          | 1.00                            | -0.49  | -0.50  | 0.25           | 0.50                             | -0.28  | 1.00                          | -0.43  | -0.89  | -0.28  | -0.75                         | 1.00   | -0.35                                           | 0.50                            | 1.00                                            | 0.50                          | 1.00                          | 1.00                                            | 1.00                          | 1.00    | -0.34   |
| Ion-type                | b <sub>5</sub> | b <sup>++</sup> <sub>11</sub> | y <sup>+++</sup> <sub>20</sub> | y <sub>6</sub> -NH <sub>3</sub> |        |        | a <sub>7</sub> | b <sub>7</sub> -H <sub>2</sub> O |        | b <sup>++</sup> <sub>15</sub> |        |        |        | b <sup>++</sup> <sub>17</sub> |        | b <sup>++</sup> <sub>18</sub> -H <sub>2</sub> O | b <sup>++</sup> <sub>18</sub>   | b <sup>++</sup> <sub>19</sub> -H <sub>2</sub> O | b <sup>++</sup> <sub>19</sub> | y <sup>++</sup> <sub>20</sub> | b <sub>9</sub>                                  | b <sup>++</sup> <sub>21</sub> |         |         |
| Delta Da                | 0.14           | 0.67                          |                                | 0.04                            |        |        | 0.22           | -0.71                            |        | 0.05                          |        |        |        | 0.15                          |        | 0.44                                            | -0.34                           | 0.36                                            | -0.11                         | -0.13                         | -0.54                                           | 0.54                          |         |         |
|                         |                |                               |                                | 0.13                            |        |        |                |                                  |        | 1.00                          |        |        |        |                               |        |                                                 | y <sub>9</sub> -NH <sub>3</sub> | b <sub>9</sub> -SOCH <sub>4</sub>               |                               |                               | b <sup>++</sup> <sub>21</sub> -H <sub>2</sub> O | 0.44                          |         |         |

# Peak 265

assignment

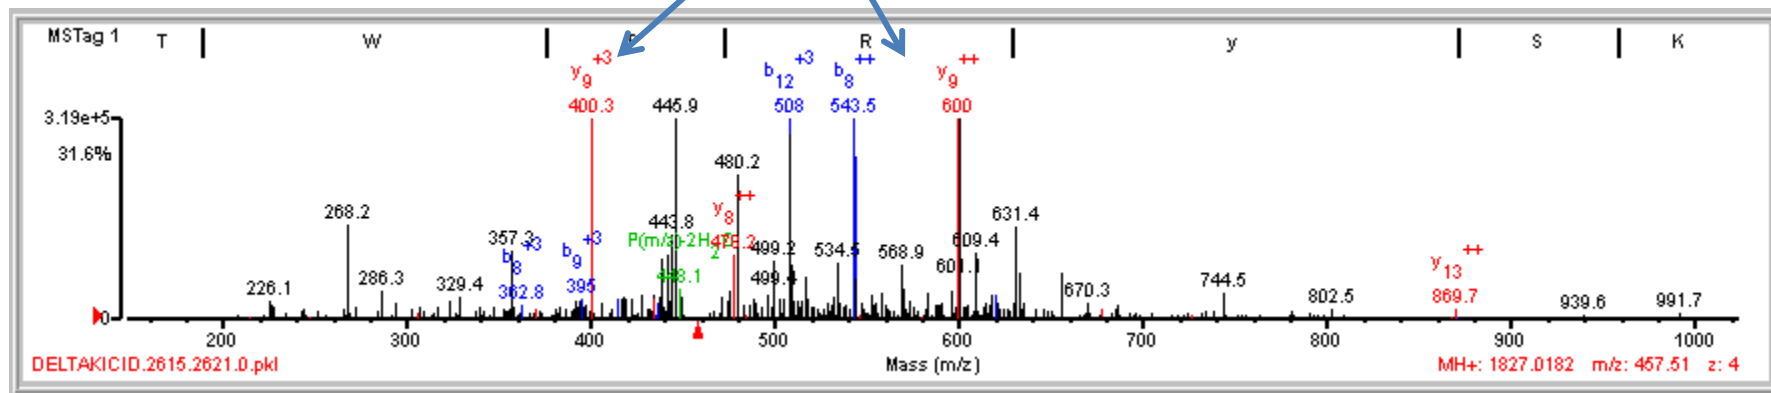

| Rank                    | Score  | SPI (%)                          | BCS                           | # Unmatched Ions                               | Variable sites               | Sequence                              | MH <sup>+</sup> Calculated (Da) | MH <sup>+</sup> Error (Da) | MH <sup>+</sup> Error (ppm) | Protein MW/pI (Da)           | Species                      | Accession #              | MS-Digest Index #              | Protein Name |                                                 |                              |        |                                 |                                 |                              |                                |                                |        |      |
|-------------------------|--------|----------------------------------|-------------------------------|------------------------------------------------|------------------------------|---------------------------------------|---------------------------------|----------------------------|-----------------------------|------------------------------|------------------------------|--------------------------|--------------------------------|--------------|-------------------------------------------------|------------------------------|--------|---------------------------------|---------------------------------|------------------------------|--------------------------------|--------------------------------|--------|------|
| 1                       | 11.33  | 75.9                             | 6                             | 8/23                                           | Y229y S235s                  | (K)S T W P R/Y S K\ P G\ L s\ M R (L) | 1665.85                         | 161.1652                   | 674.6                       | 76667.1/5.96                 | Homo sapiens                 | <a href="#">14149657</a> | <a href="#">34744</a>          | NULP1        |                                                 |                              |        |                                 |                                 |                              |                                |                                |        |      |
| Fragment-ion (m/z)      | 268.16 | 357.30                           | 400.33                        | 427.86                                         | 434.09                       | 436.58                                | 438.98                          | 442.31                     | 445.89                      | 478.24                       | 480.21                       | 499.16                   | 507.98                         | 517.31       | 534.46                                          | 543.50                       | 553.24 | 568.94                          | 569.19                          | 600.03                       | 609.36                         | 620.34                         | 631.42 |      |
| Frac. Inten. (% of TIC) | 2.35   | 1.83                             | 4.88                          | 1.18                                           | 1.22                         | 1.10                                  | 1.87                            | 4.04                       | 6.66                        | 2.35                         | 3.20                         | 1.93                     | 17.61                          | 1.48         | 1.79                                            | 12.97                        | 1.61   | 1.18                            | 2.77                            | 20.63                        | 1.88                           | 1.27                           | 4.20   |      |
| Rel. Inten. (% of BP)   | 11.39  | 8.87                             | 23.64                         | 5.73                                           | 5.92                         | 5.33                                  | 9.08                            | 19.56                      | 32.29                       | 11.40                        | 15.49                        | 9.37                     | 85.39                          | 7.19         | 8.66                                            | 62.90                        | 7.83   | 5.70                            | 13.44                           | 100.00                       | 9.10                           | 6.18                           | 20.36  |      |
| Score                   | -0.11  | 0.50                             | 1.00                          | 0.50                                           | 1.00                         | 1.00                                  | -0.09                           | -0.20                      | -0.32                       | 1.00                         | 1.00                         | -0.09                    | 1.00                           | -0.07        | 0.50                                            | 1.00                         | -0.08  | 0.50                            | 0.50                            | 1.00                         | 1.00                           | 1.00                           | -0.20  |      |
| Ion-type                |        | b <sub>3</sub> -H <sub>2</sub> O | y <sup>+++</sup> <sub>9</sub> | b <sup>++</sup> <sub>6</sub> -H <sub>2</sub> O | y <sup>++</sup> <sub>7</sub> | b <sup>++</sup> <sub>8</sub>          |                                 |                            |                             | y <sup>++</sup> <sub>8</sub> | b <sup>++</sup> <sub>7</sub> |                          | b <sup>+++</sup> <sub>12</sub> |              | b <sup>+++</sup> <sub>8</sub> -H <sub>2</sub> O | b <sup>++</sup> <sub>8</sub> |        | y <sub>4</sub> -NH <sub>3</sub> | y <sub>4</sub> -NH <sub>3</sub> | a <sub>5</sub>               | y <sup>+++</sup> <sub>14</sub> | b <sup>+++</sup> <sub>10</sub> |        |      |
| Delta Da                |        | 0.14                             | 0.17                          | 0.69                                           | -0.62                        | 0.40                                  |                                 |                            |                             | 0.01                         | 0.52                         |                          | 0.43                           |              | -0.28                                           | -0.24                        |        | -0.28                           | -0.03                           | -0.30                        | 609.36                         | -0.44                          |        |      |
|                         |        |                                  |                               | 0.50                                           |                              |                                       |                                 |                            |                             |                              |                              |                          |                                |              |                                                 |                              |        |                                 |                                 | y <sup>++</sup> <sub>9</sub> |                                |                                |        | 0.29 |

# Peak 266

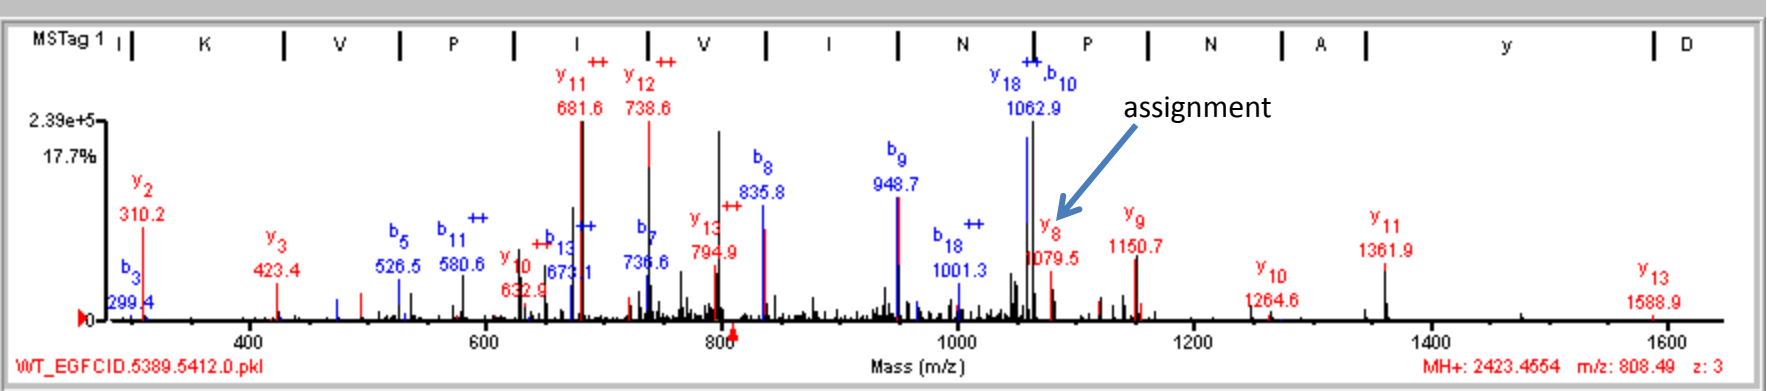

| Rank                    | Score          | SPI (%)        | BCS                            | # Unmatched Ions | Variable sites | Sequence                                         | MH <sup>+</sup> Calculated (Da) | MH <sup>+</sup> Error (Da) | MH <sup>+</sup> Error (ppm) | Protein MW/pI (Da)             | Species      | Accession #                                      | MS-Digest Index #     | Protein Name                  |                                |                                |                                |                                  |                                                  |                                |                                 |                |                                |                |                 |
|-------------------------|----------------|----------------|--------------------------------|------------------|----------------|--------------------------------------------------|---------------------------------|----------------------------|-----------------------------|--------------------------------|--------------|--------------------------------------------------|-----------------------|-------------------------------|--------------------------------|--------------------------------|--------------------------------|----------------------------------|--------------------------------------------------|--------------------------------|---------------------------------|----------------|--------------------------------|----------------|-----------------|
| 1                       | 18.72          | 91.6           | 12                             | 5/25             | Y635y          | (K)N A/I/K V P I V I N P\N/A y D N L A\I Y K (S) | 2343.31                         | 80.1484                    | 75.1                        | 193107.5/6.46                  | Homo sapiens | <a href="#">148368962</a>                        | <a href="#">24198</a> | NKF3 kinase family member     |                                |                                |                                |                                  |                                                  |                                |                                 |                |                                |                |                 |
| Fragment-ion (m/z)      | 310.17         | 526.50         | 580.65                         | 629.14           | 650.77         | 673.37                                           | 681.59                          | 730.55                     | 736.55                      | 738.64                         | 764.73       | 794.88                                           | 798.16                | 835.77                        | 844.48                         | 948.69                         | 1001.28                        | 1045.67                          | 1049.14                                          | 1057.99                        | 1062.94                         | 1079.52        | 1119.63                        | 1150.70        | 1361.88         |
| Frac. Inten. (% of TIC) | 1.97           | 1.18           | 1.83                           | 2.13             | 1.41           | 2.94                                             | 30.32                           | 1.16                       | 0.98                        | 8.90                           | 1.75         | 0.99                                             | 1.98                  | 4.37                          | 1.10                           | 5.93                           | 1.14                           | 1.39                             | 2.01                                             | 5.80                           | 12.32                           | 1.78           | 1.12                           | 2.88           | 2.63            |
| Rel. Inten. (% of BP)   | 6.50           | 3.90           | 6.04                           | 7.04             | 4.65           | 9.70                                             | 100.00                          | 3.82                       | 3.23                        | 29.36                          | 5.78         | 3.25                                             | 6.53                  | 14.40                         | 3.63                           | 19.57                          | 3.75                           | 4.58                             | 6.64                                             | 19.12                          | 40.62                           | 5.86           | 3.69                           | 9.50           | 8.68            |
| Score                   | 1.00           | 1.00           | 1.00                           | -0.07            | -0.05          | 1.00                                             | 1.00                            | -0.04                      | 1.00                        | 1.00                           | -0.06        | 1.00                                             | -0.07                 | 1.00                          | 1.00                           | 1.00                           | 1.00                           | 0.50                             | 0.50                                             | 1.00                           | 1.00                            | 1.00           | 1.00                           | 1.00           | 1.00            |
| Ion-type                | y <sub>2</sub> | b <sub>5</sub> | b <sup>+++</sup> <sub>11</sub> |                  |                | b <sup>+++</sup> <sub>13</sub>                   | y <sup>+++</sup> <sub>11</sub>  |                            | b <sub>7</sub>              | y <sup>+++</sup> <sub>12</sub> |              | b <sup>+++</sup> <sub>14</sub>                   |                       | b <sub>8</sub>                | y <sup>+++</sup> <sub>14</sub> | b <sub>9</sub>                 | b <sup>+++</sup> <sub>18</sub> | b <sub>10</sub> -NH <sub>3</sub> | b <sup>+++</sup> <sub>19</sub> -H <sub>2</sub> O | b <sup>+++</sup> <sub>19</sub> | b <sub>10</sub>                 | y <sub>8</sub> | y <sup>+++</sup> <sub>19</sub> | y <sub>9</sub> | y <sub>11</sub> |
| Delta Da                | -0.01          | 0.17           | 0.29                           |                  |                | 0.47                                             | 0.28                            |                            | 0.08                        | 0.31                           |              | 0.46                                             |                       | 0.23                          | 0.07                           | 0.07                           | 0.27                           | 0.03                             | 0.59                                             | 0.43                           |                                 | 0.04           | 0.03                           | 0.18           | 0.27            |
|                         |                |                |                                |                  |                |                                                  |                                 |                            |                             |                                |              | y <sup>+++</sup> <sub>13</sub>                   |                       | y <sup>+++</sup> <sub>7</sub> |                                | y <sup>+++</sup> <sub>16</sub> |                                |                                  |                                                  |                                | y <sup>+++</sup> <sub>18</sub>  |                |                                |                |                 |
|                         |                |                |                                |                  |                |                                                  |                                 |                            |                             |                                |              | y <sup>+++</sup> <sub>14</sub> -H <sub>2</sub> O |                       | 0.37                          |                                |                                |                                |                                  |                                                  |                                | y <sup>+++</sup> <sub>18</sub>  |                |                                |                |                 |
|                         |                |                |                                |                  |                |                                                  |                                 |                            |                             |                                |              |                                                  |                       |                               |                                |                                |                                |                                  |                                                  |                                | y <sub>8</sub> -NH <sub>3</sub> |                |                                |                |                 |
|                         |                |                |                                |                  |                |                                                  |                                 |                            |                             |                                |              |                                                  |                       |                               |                                |                                |                                |                                  |                                                  |                                | 0.49                            |                |                                |                |                 |

# Peak 267

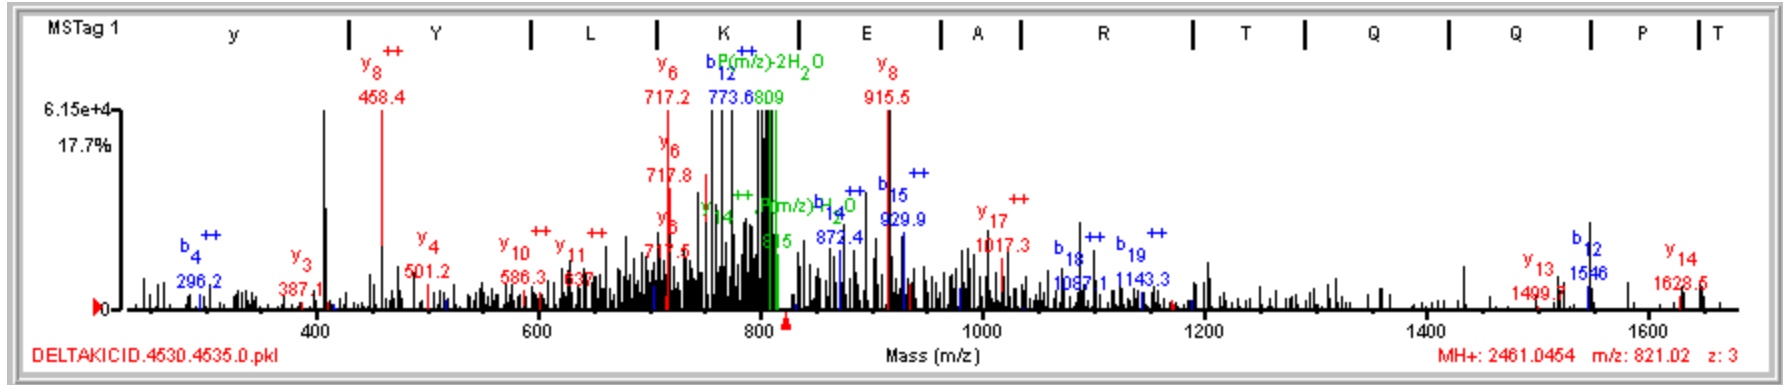

| Rank                    | Score  | SPI (%)          | BCS                | # Unmatched Ions | Variable sites | Sequence                                        | MH <sup>+</sup> Calculated (Da) | MH <sup>+</sup> Error (Da) | MH <sup>+</sup> Error (ppm) | Protein MW/pI (Da)                   | Species                              | Accession #               | MS-Digest Index #     | Protein Name                      |        |                    |                                 |                |        |                                     |        |        |                |                    |                    |
|-------------------------|--------|------------------|--------------------|------------------|----------------|-------------------------------------------------|---------------------------------|----------------------------|-----------------------------|--------------------------------------|--------------------------------------|---------------------------|-----------------------|-----------------------------------|--------|--------------------|---------------------------------|----------------|--------|-------------------------------------|--------|--------|----------------|--------------------|--------------------|
| 1                       | 13.16  | 78.0             | 8                  | 8/25             | Y185y          | (K) A/L/Y/L K/E/A R T Q Q I P T/D/T N V I R (Y) | 2380.26                         | 80.7835                    | 332.0                       | 24379.0/9.13                         | Homo sapiens                         | <a href="#">150456465</a> | <a href="#">31967</a> | tetratricopeptide repeat domain 9 |        |                    |                                 |                |        |                                     |        |        |                |                    |                    |
| Fragment-ion (m/z)      | 407.83 | 458.43           | 678.87             | 707.99           | 717.20         | 743.85                                          | 750.36                          | 755.93                     | 759.61                      | 764.71                               | 765.06                               | 773.57                    | 773.89                | 787.13                            | 789.89 | 797.47             | 801.24                          | 803.67         | 806.27 | 811.31                              | 814.52 | 883.55 | 915.53         | 929.36             | 1017.31            |
| Frac. Inten. (% of TIC) | 6.35   | 4.14             | 1.62               | 1.64             | 5.80           | 1.78                                            | 2.70                            | 3.52                       | 2.66                        | 2.15                                 | 5.15                                 | 3.00                      | 7.20                  | 1.70                              | 1.84   | 3.32               | 3.98                            | 4.00           | 3.62   | 3.52                                | 5.38   | 1.59   | 20.08          | 1.67               | 1.56               |
| Rel. Inten. (% of BP)   | 31.64  | 20.64            | 8.09               | 8.18             | 28.91          | 8.88                                            | 13.46                           | 17.53                      | 13.25                       | 10.73                                | 25.66                                | 14.94                     | 35.85                 | 8.47                              | 9.16   | 16.52              | 19.83                           | 19.90          | 18.04  | 17.56                               | 26.79  | 7.92   | 100.00         | 8.33               | 7.79               |
| Score                   | -0.32  | 1.00             | 1.00               | -0.08            | 1.00           | -0.09                                           | 1.00                            | -0.18                      | 1.00                        | 0.50                                 | 0.50                                 | 1.00                      | 1.00                  | -0.08                             | -0.09  | 1.00               | 0.50                            | 0.25           | 0.50   | -0.18                               | 1.00   | -0.08  | 1.00           | 1.00               | 1.00               |
| Ion-type                |        | y <sup>++8</sup> | y <sup>+++17</sup> |                  | y <sub>6</sub> |                                                 | y <sup>++13</sup>               |                            | y <sup>+++18</sup>          | b <sup>+++12</sup> -H <sub>2</sub> O | b <sup>+++12</sup> -H <sub>2</sub> O | b <sup>+++12</sup>        | b <sup>+++12</sup>    |                                   |        | y <sup>+++19</sup> | y <sub>7</sub> -NH <sub>3</sub> | a <sub>5</sub> |        | y <sup>++14</sup> -H <sub>2</sub> O |        |        | y <sub>6</sub> | b <sup>+++15</sup> | y <sup>+++17</sup> |
| Delta Da                |        | 0.18             | 0.51               |                  | -0.19          |                                                 | -0.04                           |                            | 0.24                        | 0.34                                 | 0.69                                 | 0.19                      | 0.51                  |                                   |        | 0.40               | -0.17                           | -0.74          |        | 0.35                                |        |        | 0.04           | -0.58              | 0.27               |





# Peak 270

Ions that verify assignment

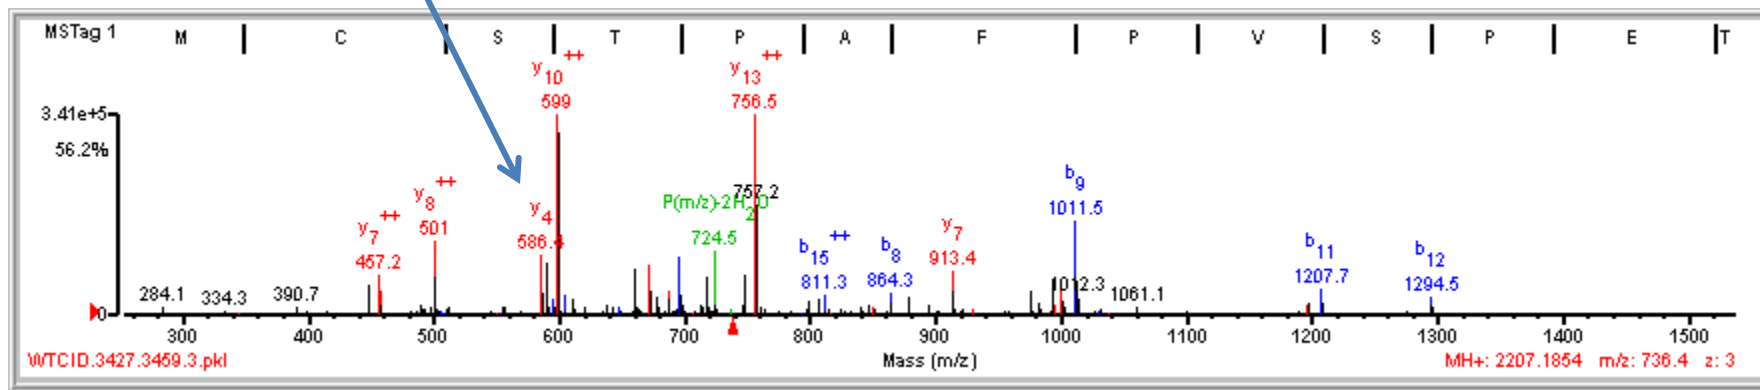

| Rank | Score | SPI (%) | BCS | # Unmatched ions | Variable sites | Sequence                                                   | MH* Calculated (Da) | MH* Error (Da) | MH* Error (ppm) | Protein MW/pl (Da) | Species      | Accession #               | MS-Digest Index #     | Protein Name                   |
|------|-------|---------|-----|------------------|----------------|------------------------------------------------------------|---------------------|----------------|-----------------|--------------------|--------------|---------------------------|-----------------------|--------------------------------|
| 1    | 17.08 | 90.4    | 7   | 4/24             | Y330y          | (K)E S M C S T   P A   F   P V   S   P E / T / P Y V K (T) | 2126.98             | 80.2081        | 109.6           | 97939.3/6.41       | Homo sapiens | <a href="#">169171407</a> | <a href="#">13944</a> | PREDICTED: similar to tensin 3 |
| 1    | 17.08 | 90.4    | 7   | 4/24             | Y855y          | (K)E S M C S T   P A   F   P V   S   P E / T / P Y V K (T) | 2126.98             | 80.2081        | 109.6           | 155266.4/6.34      | Homo sapiens | <a href="#">65288071</a>  | <a href="#">34866</a> | tensin 3                       |

| Fragment-ion (m/z)     | 448.30                             | 457.24           | 501.02           | 586.38         | 589.89                              | 598.98            | 660.10 | 672.47            | 678.26                           | 687.47         | 696.30         | 718.68 | 747.83                              | 756.51            | 811.31 | 864.30         | 913.41         | 975.46 | 993.50                           | 1000.45        | 1011.49        | 1196.66         | 1207.72         | 1294.47         |
|------------------------|------------------------------------|------------------|------------------|----------------|-------------------------------------|-------------------|--------|-------------------|----------------------------------|----------------|----------------|--------|-------------------------------------|-------------------|--------|----------------|----------------|--------|----------------------------------|----------------|----------------|-----------------|-----------------|-----------------|
| Frac. Inten.(% of TIC) | 1.78                               | 3.02             | 4.76             | 3.46           | 3.51                                | 22.91             | 3.64   | 3.05              | 1.29                             | 2.08           | 4.21           | 2.43   | 2.33                                | 14.31             | 1.39   | 1.50           | 3.52           | 2.15   | 3.23                             | 2.58           | 7.74           | 1.27            | 2.16            | 1.70            |
| Rel. Inten.(% of BP)   | 7.77                               | 13.19            | 20.78            | 15.08          | 15.33                               | 100.00            | 15.88  | 13.30             | 5.63                             | 9.07           | 18.37          | 10.61  | 10.15                               | 62.47             | 6.05   | 6.53           | 15.35          | 9.38   | 14.12                            | 11.28          | 33.78          | 5.55            | 9.41            | 7.41            |
| Score                  | 0.50                               | 1.00             | 1.00             | 1.00           | 0.50                                | 1.00              | -0.16  | 1.00              | 0.50                             | 1.00           | 1.00           | -0.11  | 0.50                                | 1.00              | -0.06  | 1.00           | 1.00           | -0.09  | 0.50                             | 1.00           | 1.00           | 1.00            | 1.00            | 1.00            |
| Ion-type               | y <sup>++7</sup> -H <sub>2</sub> O | y <sup>++7</sup> | y <sup>++8</sup> | y <sub>4</sub> | y <sup>++10</sup> -H <sub>2</sub> O | y <sup>++10</sup> |        | y <sup>++11</sup> | b <sub>6</sub> -H <sub>2</sub> O | y <sub>5</sub> | b <sub>6</sub> |        | y <sup>++13</sup> -H <sub>2</sub> O | y <sup>++13</sup> |        | b <sub>8</sub> | y <sub>7</sub> |        | b <sub>9</sub> -H <sub>2</sub> O | y <sub>8</sub> | b <sub>9</sub> | y <sub>10</sub> | b <sub>11</sub> | b <sub>12</sub> |
| Delta Da               | 0.10                               | 0.03             | 0.30             | 0.12           | 0.11                                | 0.20              |        | 0.15              | 0.04                             | 0.16           | 0.07           |        | 0.47                                | 0.15              |        | -0.02          | 0.00           |        | 0.12                             | 0.01           | 0.10           | 0.10            | 0.21            | -0.07           |

# Peak 271

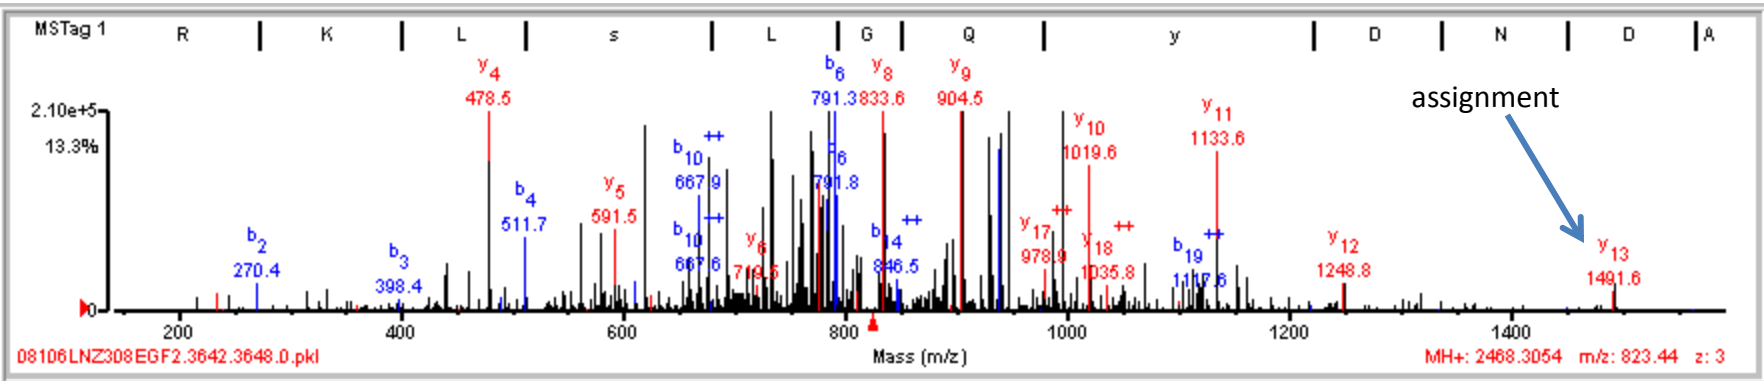

| Rank | Score | SPI (%) | BCS | # Unmatched Ions | Variable sites | Sequence                                          | MH <sup>+</sup> Calculated (Da) | MH <sup>+</sup> Error (Da) | MH <sup>+</sup> Error (ppm) | Protein MW/pl (Da) | Species      | Accession #               | MS-Digest Index #     | Protein Name                   |
|------|-------|---------|-----|------------------|----------------|---------------------------------------------------|---------------------------------|----------------------------|-----------------------------|--------------------|--------------|---------------------------|-----------------------|--------------------------------|
| 1    | 12.93 | 75.2    | 9   | 5/22             | Y255y S251s    | (R) L R/K L s L\G Q y D N D A/G/G Q\L P F S K (C) | 2307.21                         | 161.0963                   | 471.4                       | 97939.3/6.41       | Homo sapiens | <a href="#">169171407</a> | <a href="#">13944</a> | PREDICTED: similar to tensin 3 |
| 1    | 12.93 | 75.2    | 9   | 5/22             | Y780y S776s    | (R) L R/K L s L\G Q y D N D A/G/G Q\L P F S K (C) | 2307.21                         | 161.0963                   | 471.4                       | 155266.4/6.34      | Homo sapiens | <a href="#">65288071</a>  | <a href="#">34866</a> | tensin 3                       |

  

| Fragment-ion (m/z)      | 478.48         | 618.92                        | 667.92                        | 676.38                                         | 693.74                        | 725.50                         | 733.65 | 760.60 | 769.43         | 776.73 | 778.98                        | 782.76 | 784.90         | 790.85         | 833.61         | 904.54                                          | 929.37                        | 938.67 | 946.95                        | 996.01          | 1019.64         | 1133.65 |
|-------------------------|----------------|-------------------------------|-------------------------------|------------------------------------------------|-------------------------------|--------------------------------|--------|--------|----------------|--------|-------------------------------|--------|----------------|----------------|----------------|-------------------------------------------------|-------------------------------|--------|-------------------------------|-----------------|-----------------|---------|
| Frac. Inten. (% of TIC) | 9.66           | 3.88                          | 3.34                          | 3.65                                           | 3.53                          | 3.07                           | 6.64   | 3.36   | 5.57           | 3.65   | 0.11                          | 2.96   | 0.26           | 0.92           | 9.16           | 8.75                                            | 4.52                          | 6.38   | 8.35                          | 5.42            | 3.24            | 3.58    |
| Rel. Inten. (% of BP)   | 100.00         | 40.23                         | 34.60                         | 37.77                                          | 36.58                         | 31.78                          | 68.80  | 34.75  | 57.72          | 37.84  | 1.13                          | 30.66  | 2.69           | 9.50           | 94.86          | 90.63                                           | 46.78                         | 66.07  | 86.50                         | 56.09           | 33.53           | 37.13   |
| Score                   | 1.00           | -0.40                         | 1.00                          | -0.38                                          | 0.25                          | 1.00                           | 1.00   | -0.35  | -0.58          | 1.00   |                               | 1.00   | 0.25           | 1.50           | 1.00           | 1.00                                            | 0.50                          | 1.00   | -0.86                         | 1.00            | 1.00            | 1.00    |
| Ion-type                | y <sub>4</sub> | b <sup>++</sup> <sub>10</sub> | b <sup>++</sup> <sub>10</sub> | b <sub>6</sub> -H <sub>3</sub> PO <sub>4</sub> | b <sup>++</sup> <sub>11</sub> | y <sup>+++</sup> <sub>19</sub> |        |        | y <sub>7</sub> | st     | b <sup>++</sup> <sub>12</sub> | st     | b <sub>e</sub> | y <sub>8</sub> | y <sub>9</sub> | b <sup>++</sup> <sub>16</sub> -H <sub>2</sub> O | b <sup>++</sup> <sub>16</sub> |        | b <sup>++</sup> <sub>17</sub> | y <sub>10</sub> | y <sub>11</sub> |         |
| Delta Da                | 0.21           |                               | 0.12                          |                                                | 0.26                          | 0.68                           | 0.33   |        |                | 0.30   |                               | 0.43   | 0.51           | -0.60          | 0.16           | 0.05                                            | -0.53                         | -0.23  |                               | 0.56            | 0.12            | 0.09    |







# Peak 275

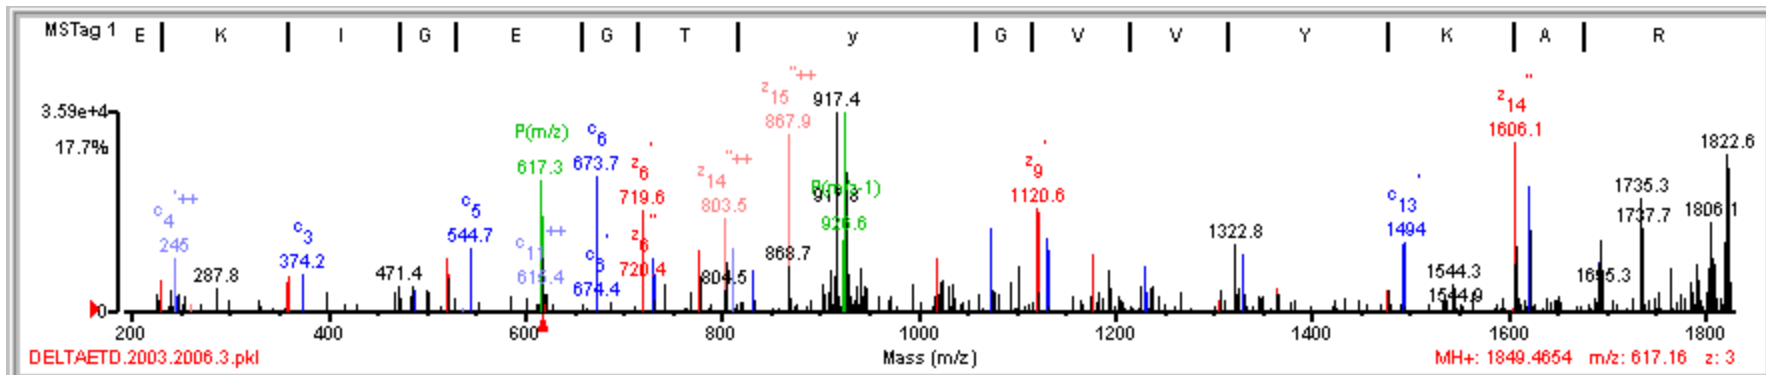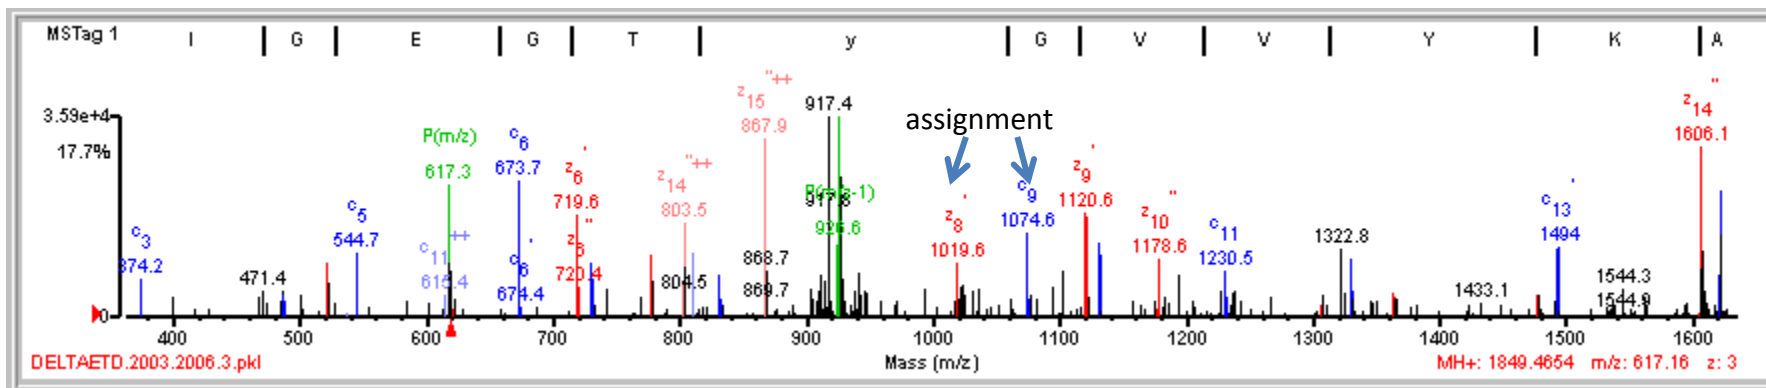

| Rank | Score | SPI (%) | BCS | # Unmatched Ions | Variable sites | Sequence                               | MH <sup>+</sup> Calculated (Da) | MH <sup>+</sup> Error (Da) | MH <sup>+</sup> Error (ppm) | Protein MW/pi (Da) | Species      | Accession #              | MS-Digest Index #     | Protein Name                        |
|------|-------|---------|-----|------------------|----------------|----------------------------------------|---------------------------------|----------------------------|-----------------------------|--------------------|--------------|--------------------------|-----------------------|-------------------------------------|
| 1    | 19.43 | 94.5    | 14  | 2/25             | Y15y           | (K)V/E/R/I/G/V G T Y G V V Y K A R (N) | 1768.96                         | 80.5062                    | 291.9                       | 33929.7/8.80       | Homo sapiens | <a href="#">16936528</a> | <a href="#">30029</a> | cyclin-dependent kinase 2 isoform 1 |
| 1    | 19.43 | 94.5    | 14  | 2/25             | Y15y           | (K)V/E/R/I/G/V G T Y G V V Y K A R (N) | 1768.96                         | 80.5062                    | 291.9                       | 30084.1/9.14       | Homo sapiens | <a href="#">16936530</a> | <a href="#">30881</a> | cyclin-dependent kinase 2 isoform 2 |

  

| Fragment-ion (m/z)      | 521.50         | 544.69         | 673.69         | 719.57         | 730.78         | 776.62         | 803.48          | 831.57         | 867.87          | 941.87         | 1019.65        | 1074.63        | 1120.65         | 1131.63         | 1177.93         | 1230.52         | 1329.75         | 1364.27         | 1492.97         | 1606.09         | 1608.35         | 1621.95         | 1692.04         | 1693.31         | 1735.31         |
|-------------------------|----------------|----------------|----------------|----------------|----------------|----------------|-----------------|----------------|-----------------|----------------|----------------|----------------|-----------------|-----------------|-----------------|-----------------|-----------------|-----------------|-----------------|-----------------|-----------------|-----------------|-----------------|-----------------|-----------------|
| Frac. Inten. (% of TIC) | 3.66           | 1.99           | 4.19           | 3.85           | 3.04           | 3.91           | 3.32            | 2.48           | 6.90            | 2.43           | 2.49           | 3.00           | 7.11            | 4.15            | 2.61            | 2.66            | 3.32            | 2.10            | 4.36            | 7.39            | 3.02            | 6.53            | 2.79            | 3.11            | 9.59            |
| Rel. Inten. (% of BP)   | 38.16          | 20.70          | 43.72          | 40.15          | 31.73          | 40.74          | 34.57           | 25.82          | 71.90           | 25.31          | 25.92          | 31.25          | 74.13           | 43.29           | 27.19           | 27.69           | 34.63           | 21.84           | 45.49           | 77.01           | 31.51           | 68.03           | 29.11           | 32.38           | 100.00          |
| Score                   | 1.00           | 1.00           | 1.00           | 1.00           | 1.00           | 1.00           | 1.00            | 1.00           | 1.00            | -0.25          | 1.00           | 1.00           | 1.00            | 1.00            | 1.00            | 1.00            | 1.00            | 1.00            | 1.00            | 0.25            | -0.32           | 0.25            | 1.00            | 0.25            | 0.25            |
| Ion-type                | z <sub>4</sub> | c <sub>5</sub> | c <sub>6</sub> | z <sub>6</sub> | c <sub>7</sub> | z <sub>7</sub> | z <sub>14</sub> | c <sub>8</sub> | z <sub>15</sub> | z <sub>8</sub> | c <sub>9</sub> | z <sub>9</sub> | c <sub>10</sub> | z <sub>10</sub> | c <sub>11</sub> | c <sub>12</sub> | z <sub>12</sub> | c <sub>13</sub> | z <sub>14</sub> | c <sub>13</sub> | z <sub>14</sub> | c <sub>14</sub> | c <sub>15</sub> | c <sub>15</sub> | z <sub>15</sub> |
| Delta Da                | 0.20           | 0.34           | 0.30           | 0.14           | 0.37           | 0.17           | 0.58            | 0.11           | 0.45            |                | 0.17           | 0.14           | 0.12            | 0.12            | 0.38            | -0.06           | 0.10            | 0.65            | 0.26            | 0.29            |                 | 0.14            | 0.20            | 0.46            | 0.46            |
|                         |                |                |                |                |                |                |                 |                |                 |                |                |                |                 |                 |                 |                 |                 |                 | y <sub>13</sub> |                 |                 |                 |                 |                 |                 |



# Peak 277

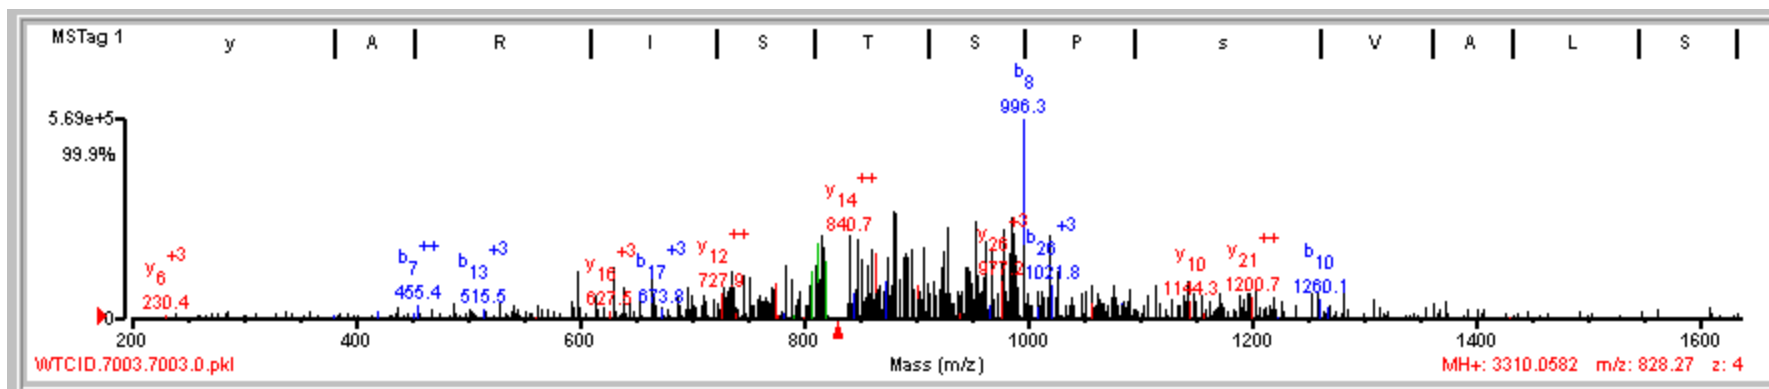

| Rank                    | Score  | SPI (%) | BCS    | # Unmatched Ions              | Variable sites                | Sequence                                                             | MH* Calculated (Da) | MH* Error (Da) | MH* Error (ppm) | Protein MW/pl (Da)            | Species                          | Accession #              | MS-Digest Index #    | Protein Name                            |                               |                                  |                                 |        |                                |                |                               |                                 |        |                |                               |
|-------------------------|--------|---------|--------|-------------------------------|-------------------------------|----------------------------------------------------------------------|---------------------|----------------|-----------------|-------------------------------|----------------------------------|--------------------------|----------------------|-----------------------------------------|-------------------------------|----------------------------------|---------------------------------|--------|--------------------------------|----------------|-------------------------------|---------------------------------|--------|----------------|-------------------------------|
| 1                       | 10.80  | 72.1    | 8      | 8/25                          | M377m Y361y Y376y S369s       | (K) H Y A/R I S T S P s /V/A L/S   K P Y m T V   S S E P P A A R (L) | 3053.55             | 256.5069       | 185.2           | 188203.3/6.23                 | Homo sapiens                     | <a href="#">21071037</a> | <a href="#">7619</a> | BCL-6 interacting corepressor isoform 1 |                               |                                  |                                 |        |                                |                |                               |                                 |        |                |                               |
| Fragment-ion (m/z)      | 665.26 | 810.22  | 812.26 | 816.12                        | 840.73                        | 848.02                                                               | 857.68              | 864.72         | 881.53          | 883.22                        | 891.32                           | 897.22                   | 906.73               | 925.83                                  | 929.09                        | 944.93                           | 946.59                          | 948.31 | 954.15                         | 967.97         | 976.43                        | 979.61                          | 985.64 | 996.31         | 1026.12                       |
| Frac. Inten. (% of TIC) | 2.86   | 3.18    | 0.12   | 5.08                          | 5.15                          | 3.54                                                                 | 3.62                | 3.91           | 4.33            | 3.28                          | 5.73                             | 4.15                     | 3.04                 | 2.96                                    | 5.61                          | 2.95                             | 3.14                            | 3.81   | 4.70                           | 5.00           | 2.99                          | 5.08                            | 4.29   | 8.71           | 2.79                          |
| Rel. Inten. (% of BP)   | 32.89  | 36.48   | 1.41   | 58.35                         | 59.11                         | 40.61                                                                | 41.52               | 44.85          | 49.73           | 37.62                         | 65.81                            | 47.64                    | 34.91                | 33.98                                   | 64.38                         | 33.83                            | 36.03                           | 43.76  | 53.93                          | 57.41          | 34.34                         | 58.35                           | 49.30  | 100.00         | 32.08                         |
| Score                   | -0.33  | -0.36   | 2.00   | 1.00                          | 1.00                          | 0.50                                                                 | -0.42               | 1.00           | 0.25            | 1.00                          | 0.50                             | -0.48                    | -0.35                | -0.34                                   | 1.00                          | 0.50                             | 0.50                            | -0.44  | 1.00                           | 0.25           | 1.00                          | 0.50                            | -0.49  | 1.00           | 1.00                          |
| Ion-type                |        |         | m      | b <sup>++</sup> <sub>14</sub> | y <sup>++</sup> <sub>14</sub> | y <sub>8</sub> -NH <sub>3</sub>                                      |                     | y <sub>8</sub> | a <sub>7</sub>  | y <sup>++</sup> <sub>15</sub> | b <sub>7</sub> -H <sub>2</sub> O |                          |                      |                                         | b <sup>++</sup> <sub>16</sub> | y <sub>9</sub> -H <sub>2</sub> O | y <sub>9</sub> -NH <sub>3</sub> |        | y <sup>+++</sup> <sub>25</sub> | a <sub>8</sub> | y <sup>++</sup> <sub>17</sub> | b <sub>8</sub> -NH <sub>3</sub> |        | b <sub>8</sub> | y <sup>++</sup> <sub>18</sub> |
| Delta Da                |        |         | 0.14   | 0.27                          | 0.35                          | 0.63                                                                 |                     | 0.30           | 0.13            | -0.67                         | -0.07                            |                          |                      |                                         | 0.66                          | -0.55                            | 0.13                            |        | 0.71                           | -0.46          | 0.47                          | 0.21                            |        | -0.12          | 0.63                          |

# Peak 278

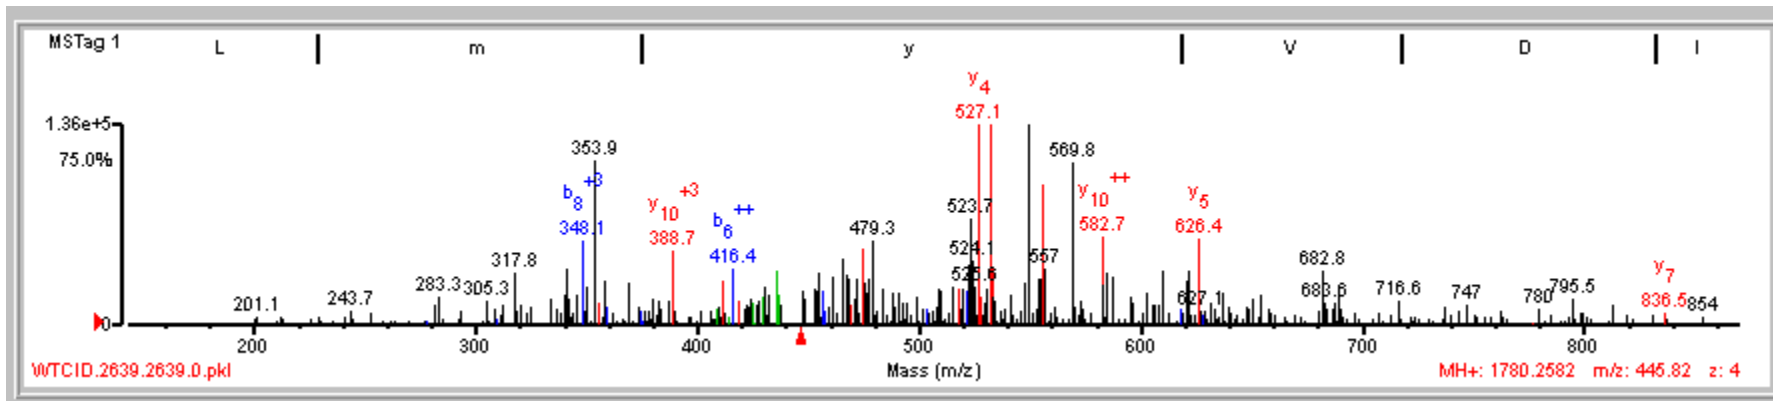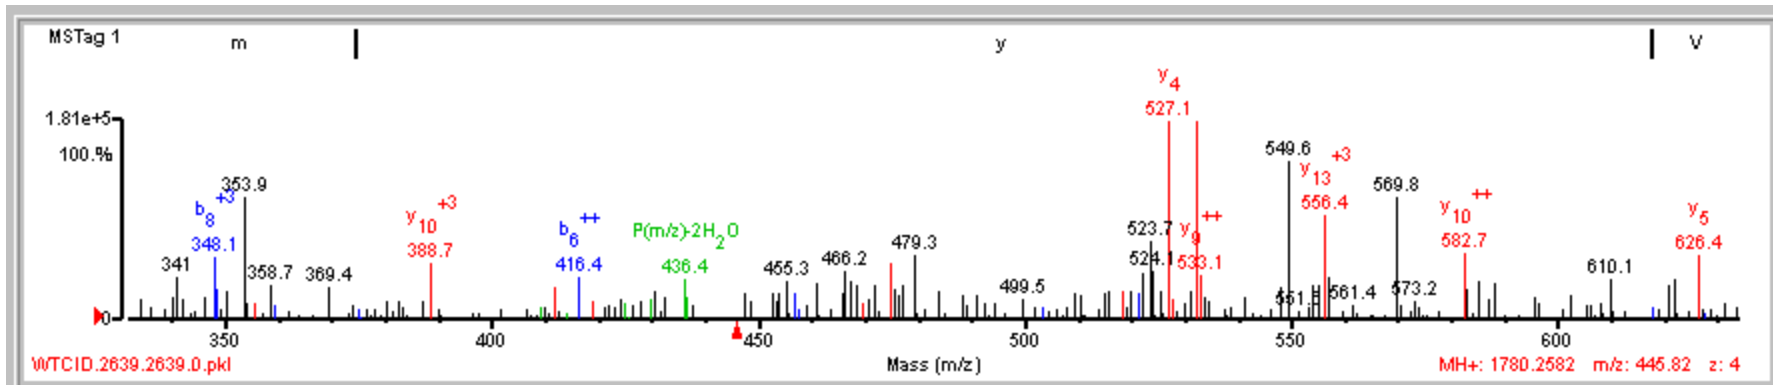

| Rank                    | Score             | SPI (%) | BCS    | # Unmatched Ions | # Variable sites   | Sequence                            | MH <sup>+</sup> Calculated (Da) | MH <sup>+</sup> Error (Da)         | MH <sup>+</sup> Error (ppm) | Protein MW/pl (Da) | Species      | Accession #                      | MS-Digest Index #     | Protein Name                                                |                |                   |        |                                   |                    |        |                   |        |                |        |
|-------------------------|-------------------|---------|--------|------------------|--------------------|-------------------------------------|---------------------------------|------------------------------------|-----------------------------|--------------------|--------------|----------------------------------|-----------------------|-------------------------------------------------------------|----------------|-------------------|--------|-----------------------------------|--------------------|--------|-------------------|--------|----------------|--------|
| 1                       | 9.14              | 60.4    | 7      | 10/24            | M586m Y587y        | (R) N/L m y/V/D/I P\I/V/D H Q K (C) | 1684.87                         | 95.3855                            | -323.4                      | 75702.8/5.39       | Homo sapiens | <a href="#">21264363</a>         | <a href="#">18407</a> | mannan-binding lectin serine protease 2 isoform 1 precursor |                |                   |        |                                   |                    |        |                   |        |                |        |
| Fragment-ion (m/z)      | 317.79            | 341.05  | 348.09 | 353.86           | 388.70             | 429.93                              | 453.88                          | 465.88                             | 467.49                      | 474.84             | 479.31       | 509.37                           | 521.40                | 523.74                                                      | 527.13         | 532.46            | 549.64 | 554.07                            | 556.41             | 569.85 | 582.66            | 620.76 | 626.40         | 682.76 |
| Frac. Inten. (% of TIC) | 2.54              | 3.00    | 4.04   | 5.96             | 2.70               | 0.07                                | 2.70                            | 2.88                               | 4.14                        | 5.65               | 2.72         | 2.38                             | 2.74                  | 6.46                                                        | 8.62           | 10.96             | 5.99   | 2.65                              | 5.62               | 5.18   | 3.96              | 3.19   | 3.20           | 2.66   |
| Rel. Inten. (% of BP)   | 23.14             | 27.33   | 36.88  | 54.42            | 24.65              | 0.60                                | 24.62                           | 26.27                              | 37.81                       | 51.51              | 24.86        | 21.68                            | 25.02                 | 58.94                                                       | 78.62          | 100.00            | 54.61  | 24.20                             | 51.32              | 47.24  | 36.14             | 29.07  | 29.20          | 24.31  |
| Score                   | 1.00              | -0.27   | -0.37  | -0.54            | 1.00               | 2.00                                | -0.25                           | 0.50                               | -0.38                       | 1.00               | -0.25        | 0.50                             | 1.00                  | 0.50                                                        | 1.00           | 1.00              | -0.55  | 0.25                              | 1.00               | -0.47  | 1.00              | -0.29  | 1.00           | -0.24  |
| Ion-type                | y+++ <sub>8</sub> |         |        |                  | y+++ <sub>10</sub> | m                                   |                                 | y++ <sub>8</sub> -H <sub>2</sub> O |                             | y++ <sub>8</sub>   |              | y <sub>4</sub> -H <sub>2</sub> O | b+++ <sub>8</sub>     | y+++ <sub>9</sub> -H <sub>2</sub> O                         | y <sub>4</sub> | y+++ <sub>9</sub> |        | b <sub>4</sub> -SOCH <sub>4</sub> | y+++ <sub>13</sub> |        | y++ <sub>10</sub> |        | y <sub>5</sub> |        |
| Delta Da                | 0.60              |         |        |                  | 0.15               | -0.03                               |                                 | -0.39                              |                             | -0.44              |              | 0.12                             | -0.32                 | -0.05                                                       | -0.13          | -0.33             |        | -0.13                             | 0.14               |        | 0.34              |        | 0.07           |        |

Reset

# Peak 279

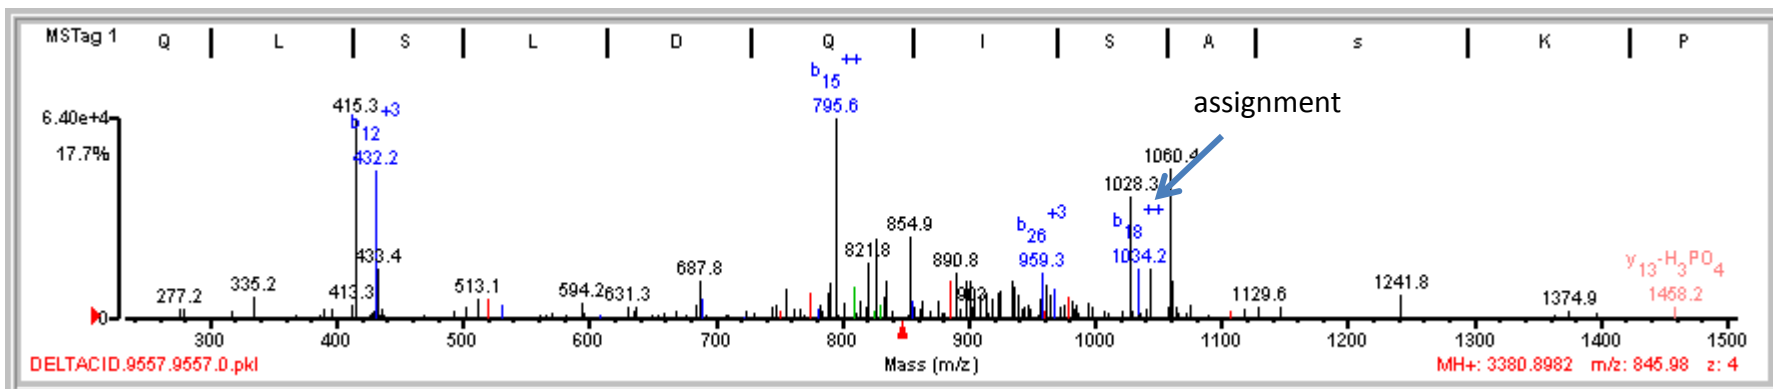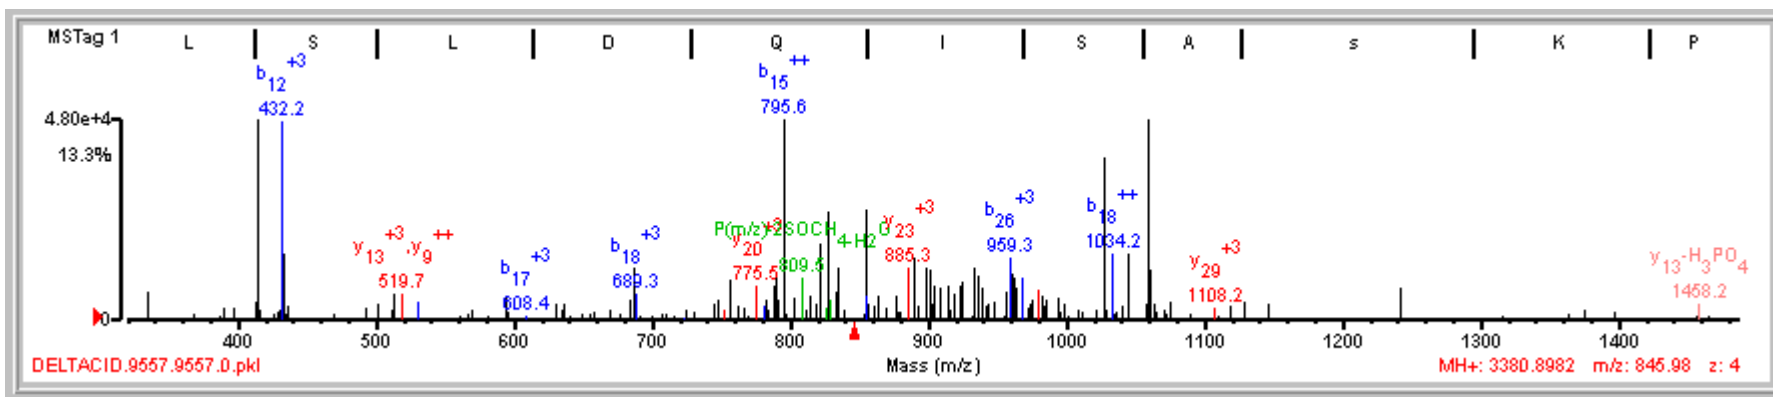

| Rank                   | Score  | SPI (%)            | BCS    | # Unmatched Ions | Variable sites        | Sequence                                                          | MH <sup>+</sup> Calculated (Da) | MH <sup>+</sup> Error (Da) | MH <sup>+</sup> Error (ppm) | Protein MW/pI (Da) | Species      | Accession #              | MS-Digest Index #     | Protein Name                    |                    |                    |                    |                                      |                    |         |
|------------------------|--------|--------------------|--------|------------------|-----------------------|-------------------------------------------------------------------|---------------------------------|----------------------------|-----------------------------|--------------------|--------------|--------------------------|-----------------------|---------------------------------|--------------------|--------------------|--------------------|--------------------------------------|--------------------|---------|
| 1                      | 12.65  | 73.6               | 10     | 7/20             | M364m Y356y S350s (K) | G L Q/L S/L/D/Q/I S A s   K P A\F/S y\T S S S T P T m\T D N R (K) | 3203.55                         | 177.3457                   | 419.4                       | 85515.07/0.03      | Homo sapiens | <a href="#">21614542</a> | <a href="#">34860</a> | single-minded homolog 1         |                    |                    |                    |                                      |                    |         |
| Fragment-ion (m/z)     | 415.30 | 432.23             | 687.84 | 789.26           | 795.64                | 821.78                                                            | 828.00                          | 835.10                     | 854.91                      | 885.27             | 890.84       | 901.84                   | 923.84                | 934.31                          | 959.33             | 961.67             | 1028.32            | 1034.25                              | 1044.71            | 1060.35 |
| Frac. Inten.(% of TIC) | 11.38  | 6.90               | 1.93   | 2.53             | 43.68                 | 0.06                                                              | 2.62                            | 1.28                       | 3.68                        | 1.28               | 1.54         | 1.63                     | 1.77                  | 1.27                            | 1.83               | 2.32               | 4.45               | 2.01                                 | 1.72               | 6.09    |
| Rel. Inten.(% of BP)   | 26.06  | 15.81              | 4.43   | 5.80             | 100.00                | 0.13                                                              | 5.99                            | 2.93                       | 8.43                        | 2.94               | 3.54         | 3.74                     | 4.06                  | 2.91                            | 4.19               | 5.32               | 10.20              | 4.60                                 | 3.95               | 13.95   |
| Score                  | -0.26  | 1.00               | -0.04  | -0.06            | 1.00                  | 1.50                                                              | 0.25                            | -0.03                      | 1.00                        | 1.00               | -0.04        | -0.04                    | 1.00                  | 0.50                            | 1.00               | 1.00               | 1.00               | 1.00                                 | 1.00               | -0.14   |
| Ion-type               |        | b+++ <sub>12</sub> |        |                  | b+++ <sub>15</sub>    | y+++ <sub>14</sub>                                                | a <sub>8</sub>                  |                            | b <sub>8</sub>              | y+++ <sub>23</sub> |              |                          | y+++ <sub>24</sub>    | y <sub>8</sub> -NH <sub>3</sub> | b+++ <sub>26</sub> | y+++ <sub>25</sub> | a <sub>10</sub>    | b+++ <sub>18</sub>                   | y+++ <sub>18</sub> |         |
| Delta Da               |        | 0.36               |        |                  | 0.24                  | -0.54                                                             | 0.54                            |                            | -0.55                       | 0.24               |              |                          | 0.46                  | -0.08                           | 0.24               | 0.60               | 0.74               | 0.28                                 | 0.77               |         |
|                        |        |                    |        |                  |                       | 1.50                                                              |                                 |                            |                             |                    |              |                          |                       |                                 |                    |                    | y+++ <sub>27</sub> | y+++ <sub>18</sub> -H <sub>2</sub> O |                    |         |
|                        |        |                    |        |                  |                       | 0.65                                                              |                                 |                            |                             |                    |              |                          |                       |                                 |                    |                    | 0.54               | -0.69                                |                    |         |





# Peak 281

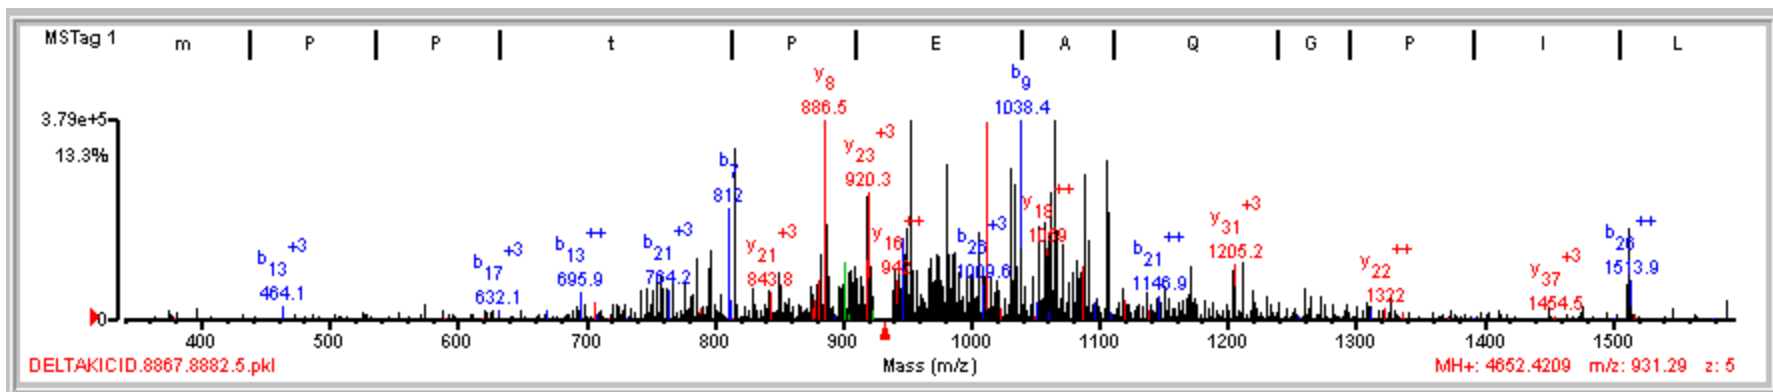

| Rank                    | Score  | SPI (%)            | BCS            | # Unmatched Ions | Variable sites | Sequence                                                                                                         | MH <sup>+</sup> Calculated (Da) | MH <sup>+</sup> Error (Da) | MH <sup>+</sup> Error (ppm) | Protein MW/pi (Da) | Species      | Accession #              | MS-Digest Index #     | Protein Name            |         |                |                                      |                    |                    |         |                    |                    |                    |
|-------------------------|--------|--------------------|----------------|------------------|----------------|------------------------------------------------------------------------------------------------------------------|---------------------------------|----------------------------|-----------------------------|--------------------|--------------|--------------------------|-----------------------|-------------------------|---------|----------------|--------------------------------------|--------------------|--------------------|---------|--------------------|--------------------|--------------------|
| 1                       | 12.76  | 66.5               | 13             | 9/23             | M4m T7t Y22y   | (-)M A S m P P t P E \ A Q G P / I L / F \ E \ I D L \ A V Y / F S Q \ E \ F \ C \ V T L H / P A Q R S L S K (D) | 4475.17                         | 177.2489                   | 284.0                       | 48076.5/6.29       | Homo sapiens | <a href="#">22748967</a> | <a href="#">16889</a> | zinc finger protein 597 |         |                |                                      |                    |                    |         |                    |                    |                    |
| Fragment-ion (m/z)      | 815.50 | 882.93             | 885.95         | 887.97           | 909.80         | 919.38                                                                                                           | 920.33                          | 947.55                     | 953.88                      | 967.33             | 982.04       | 1000.32                  | 1012.52               | 1031.18                 | 1034.98 | 1038.41        | 1053.18                              | 1059.69            | 1062.14            | 1065.56 | 1088.49            | 1106.67            | 1512.94            |
| Frac. Inten. (% of TIC) | 5.01   | 2.24               | 27.12          | 2.86             | 2.09           | 2.46                                                                                                             | 3.43                            | 2.67                       | 5.23                        | 2.06               | 3.15         | 2.20                     | 3.11                  | 3.26                    | 3.07    | 4.63           | 2.04                                 | 2.10               | 3.81               | 6.28    | 3.87               | 5.19               | 2.14               |
| Rel. Inten. (% of BP)   | 18.47  | 8.26               | 100.00         | 10.54            | 7.71           | 9.06                                                                                                             | 12.64                           | 9.83                       | 19.27                       | 7.60               | 11.62        | 8.10                     | 11.47                 | 12.03                   | 11.32   | 17.08          | 7.51                                 | 7.73               | 14.06              | 23.14   | 14.25              | 19.16              | 7.88               |
| Score                   | -0.18  | 1.00               | 1.00           | -0.11            | 1.00           | -0.09                                                                                                            | 1.00                            | 1.00                       | -0.19                       | 1.00               | -0.12        | -0.08                    | 1.00                  | -0.12                   | -0.11   | 1.00           | 1.00                                 | 1.00               | 1.00               | -0.23   | 1.00               | 1.00               | 1.00               |
| Ion-type                |        | b <sup>+++16</sup> | y <sub>5</sub> |                  | b <sub>3</sub> |                                                                                                                  | y <sup>+++23</sup>              | b <sup>+++17</sup>         |                             | b <sup>+++25</sup> |              |                          | y <sup>+++25</sup>    |                         |         | b <sub>9</sub> | b <sup>+++19</sup> -H <sub>2</sub> O | y <sup>+++18</sup> | b <sup>+++19</sup> |         | y <sup>+++27</sup> | b <sup>+++28</sup> | b <sup>+++28</sup> |
| Delta Da                |        | 0.04               | -0.56          |                  | 0.48           |                                                                                                                  | 0.23                            | 0.14                       |                             | 0.92               |              |                          | 0.38                  |                         |         | 0.04           | 0.72                                 | 0.66               | 0.67               |         | 0.96               | 0.89               | -0.70              |
|                         |        |                    |                |                  |                |                                                                                                                  |                                 |                            |                             |                    |              |                          |                       |                         |         |                | b <sup>+++27</sup>                   |                    |                    |         |                    |                    |                    |
|                         |        |                    |                |                  |                |                                                                                                                  |                                 |                            |                             |                    |              |                          |                       |                         |         |                | 0.74                                 |                    |                    |         |                    |                    |                    |

# Peak 282

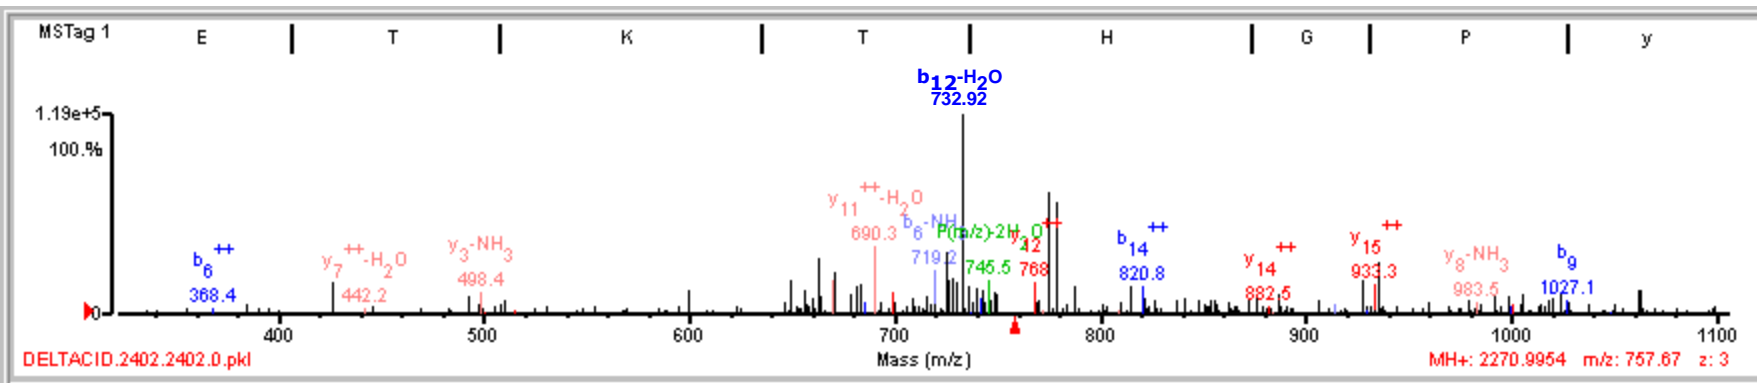

| Rank                    | Score  | SPI (%) | BCS                             | # Unmatched Ions                     | Variable sites     | Sequence                                    | MH <sup>+</sup> Calculated (Da) | MH <sup>+</sup> Error (Da) | MH <sup>+</sup> Error (ppm) | Protein MW/pI (Da)                   | Species            | Accession #              | MS-Digest Index #   | Protein Name                   |        |                    |                                 |        |                    |        |                    |                |                    |
|-------------------------|--------|---------|---------------------------------|--------------------------------------|--------------------|---------------------------------------------|---------------------------------|----------------------------|-----------------------------|--------------------------------------|--------------------|--------------------------|---------------------|--------------------------------|--------|--------------------|---------------------------------|--------|--------------------|--------|--------------------|----------------|--------------------|
| 1                       | 11.49  | 61.0    | 9                               | 8/23                                 | Y79y Y85y          | (K) F/E E/T K T/H/G/P/Y V I/T G/D Y/P/R (S) | 2110.02                         | 160.9715                   | 457.4                       | 13361.1/4.89                         | Homo sapiens       | <a href="#">22749457</a> | <a href="#">387</a> | hypothetical protein LOC221718 |        |                    |                                 |        |                    |        |                    |                |                    |
| Fragment-ion (m/z)      | 655.82 | 663.43  | 670.25                          | 690.33                               | 699.32             | 708.55                                      | 719.20                          | 725.22                     | 728.08                      | 732.92                               | 741.51             | 748.54                   | 767.98              | 774.59                         | 778.91 | 820.76             | 855.85                          | 928.16 | 933.28             | 935.53 | 999.27             | 1027.09        | 1062.40            |
| Frac. Inten. (% of TIC) | 3.26   | 4.88    | 4.91                            | 4.27                                 | 2.30               | 2.59                                        | 3.40                            | 0.21                       | 2.99                        | 19.38                                | 2.69               | 2.75                     | 3.37                | 9.29                           | 8.39   | 4.18               | 2.29                            | 3.75   | 2.39               | 3.70   | 2.95               | 2.63           | 3.42               |
| Rel. Inten. (% of BP)   | 16.81  | 25.16   | 25.35                           | 22.04                                | 11.86              | 13.34                                       | 17.55                           | 1.09                       | 15.45                       | 100.00                               | 13.88              | 14.16                    | 17.40               | 47.93                          | 43.28  | 21.55              | 11.83                           | 19.35  | 12.34              | 19.07  | 15.24              | 13.59          | 17.66              |
| Score                   | -0.17  | -0.25   | 1.00                            | 0.50                                 | 1.00               | 1.00                                        | 0.50                            | 1.50                       | -0.15                       | 0.50                                 | 1.00               | -0.14                    | 1.00                | -0.48                          | -0.43  | 1.00               | 0.50                            | -0.19  | 1.00               | -0.19  | 1.00               | 1.00           | 1.00               |
| Ion-type                |        |         | y+++ <sub>10</sub>              | y+++ <sub>11</sub> -H <sub>2</sub> O | b+++ <sub>17</sub> | a <sub>6</sub>                              | b <sub>6</sub> -NH <sub>3</sub> | sty                        |                             | b+++ <sub>12</sub> -H <sub>2</sub> O | b+++ <sub>12</sub> | y+++ <sub>12</sub>       |                     |                                |        | b+++ <sub>14</sub> | b <sub>7</sub> -NH <sub>3</sub> |        | y+++ <sub>15</sub> |        | a <sub>9</sub>     | b <sub>3</sub> | y+++ <sub>17</sub> |
| Delta Da                |        |         | -0.52                           | 0.05                                 | 0.03               | 0.19                                        | -0.12                           | 0.56                       |                             | 0.09                                 | -0.33              | 0.17                     |                     |                                | -0.11  | -0.53              |                                 | 0.37   |                    |        | -0.22              | -0.39          | 0.45               |
|                         |        |         | y <sub>5</sub> -NH <sub>3</sub> |                                      | y+++ <sub>11</sub> | y+++ <sub>17</sub>                          |                                 |                            |                             |                                      |                    |                          |                     |                                |        |                    |                                 |        |                    |        | b+++ <sub>16</sub> |                |                    |
|                         |        |         | 0.03                            |                                      | 0.04               | 0.25                                        |                                 |                            |                             |                                      |                    |                          |                     |                                |        |                    |                                 |        |                    |        | -0.63              |                |                    |



# Peak 284

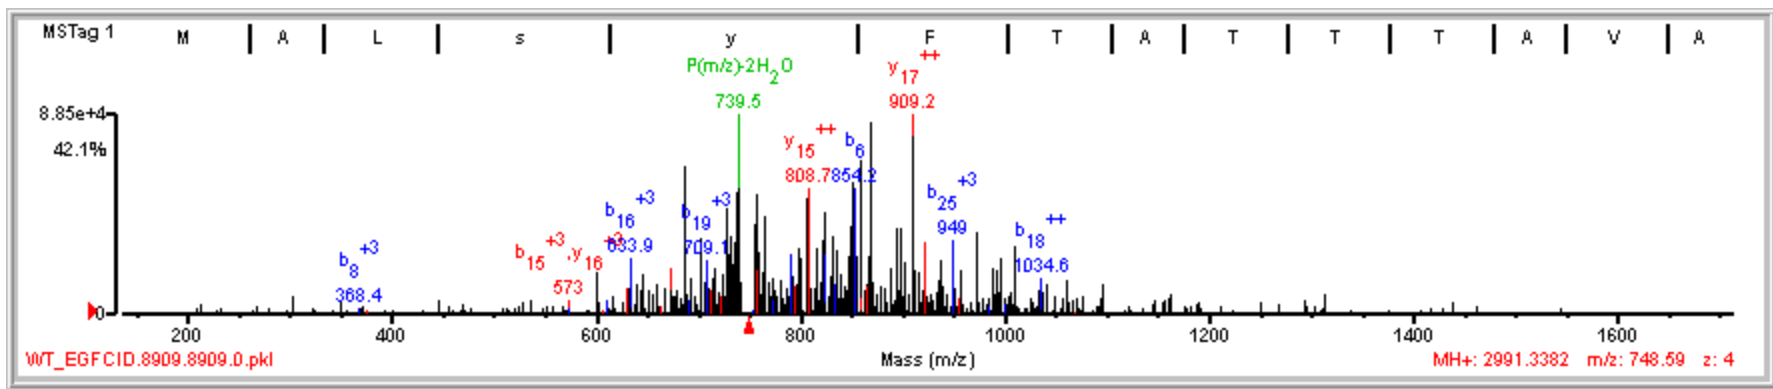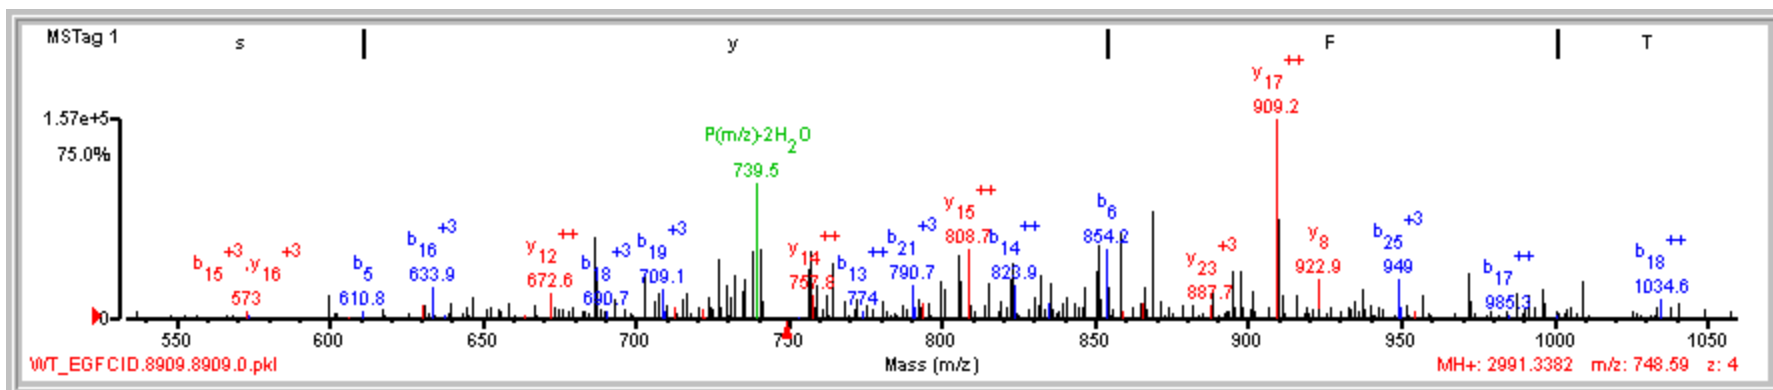

| Rank                    | Score             | SPI (%) | BCS    | # Unmatched Ions | Variable sites    | Sequence                                                                  | MH <sup>+</sup> Calculated (Da) | MH <sup>+</sup> Error (Da) | MH <sup>+</sup> Error (ppm) | Protein MW/pl (Da) | Species      | Accession #       | MS-Digest Index # | Protein Name   |                    |                                     |                |                   |        |        |        |                   |                |                    |        |
|-------------------------|-------------------|---------|--------|------------------|-------------------|---------------------------------------------------------------------------|---------------------------------|----------------------------|-----------------------------|--------------------|--------------|-------------------|-------------------|----------------|--------------------|-------------------------------------|----------------|-------------------|--------|--------|--------|-------------------|----------------|--------------------|--------|
| 1                       | 10.89             | 60.8    | 11     | 12/25            | T160t Y150y S149s | (R) Q M A L / s y F T A / T / T / I A V I A t A V / G M / N M L T R K (A) | 2750.39                         | 240.9456                   | 349.9                       | 36232.0/9.47       | Homo sapiens | 30578418          | 12854             | sideroflexin 2 |                    |                                     |                |                   |        |        |        |                   |                |                    |        |
| Fragment-ion (m/z)      | 672.55            | 686.78  | 709.14 | 727.49           | 731.43            | 734.90                                                                    | 738.08                          | 756.51                     | 757.19                      | 764.77             | 805.56       | 808.67            | 823.33            | 832.49         | 835.51             | 850.43                              | 854.19         | 858.41            | 868.89 | 895.06 | 897.80 | 909.25            | 922.91         | 949.04             | 972.47 |
| Frac. Inten. (% of TIC) | 2.17              | 6.23    | 2.25   | 3.12             | 2.76              | 2.83                                                                      | 2.81                            | 2.08                       | 4.33                        | 2.26               | 4.23         | 3.91              | 4.29              | 2.94           | 2.66               | 6.03                                | 4.88           | 4.09              | 5.27   | 2.56   | 2.80   | 18.54             | 2.07           | 2.20               | 2.92   |
| Rel. Inten. (% of BP)   | 11.72             | 33.59   | 12.13  | 16.81            | 14.86             | 15.27                                                                     | 15.18                           | 11.19                      | 23.35                       | 12.21              | 22.79        | 21.10             | 23.13             | 15.86          | 14.33              | 32.52                               | 26.31          | 22.07             | 28.40  | 13.79  | 13.99  | 100.00            | 11.17          | 11.89              | 15.78  |
| Score                   | 1.00              | -0.34   | -0.12  | -0.17            | -0.15             | 1.00                                                                      | 1.00                            | -0.11                      | 1.00                        | -0.12              | -0.23        | 1.00              | 1.00              | -0.16          | 1.00               | 1.00                                | 1.00           | 1.00              | -0.28  | -0.14  | -0.14  | 1.00              | 1.00           | 1.00               | -0.16  |
| Ion-type                | y <sup>++12</sup> |         |        |                  |                   | y <sub>6</sub>                                                            | b <sup>++12</sup>               |                            | y <sup>++14</sup>           |                    |              | y <sup>++15</sup> | b <sup>++14</sup> |                | b <sup>+++22</sup> | y <sup>++16</sup> -H <sub>2</sub> O | b <sub>8</sub> | y <sup>++16</sup> |        |        |        | y <sup>++17</sup> | y <sub>8</sub> | b <sup>+++25</sup> |        |
| Delta Da                | -0.27             |         |        |                  |                   | 0.48                                                                      | -0.70                           |                            | 1.00                        | -0.69              |              | 0.27              | -0.50             |                | 0.85               | 0.51                                | -0.07          | -0.51             |        |        |        | -0.20             | 0.43           | 0.31               |        |

# Peak 285

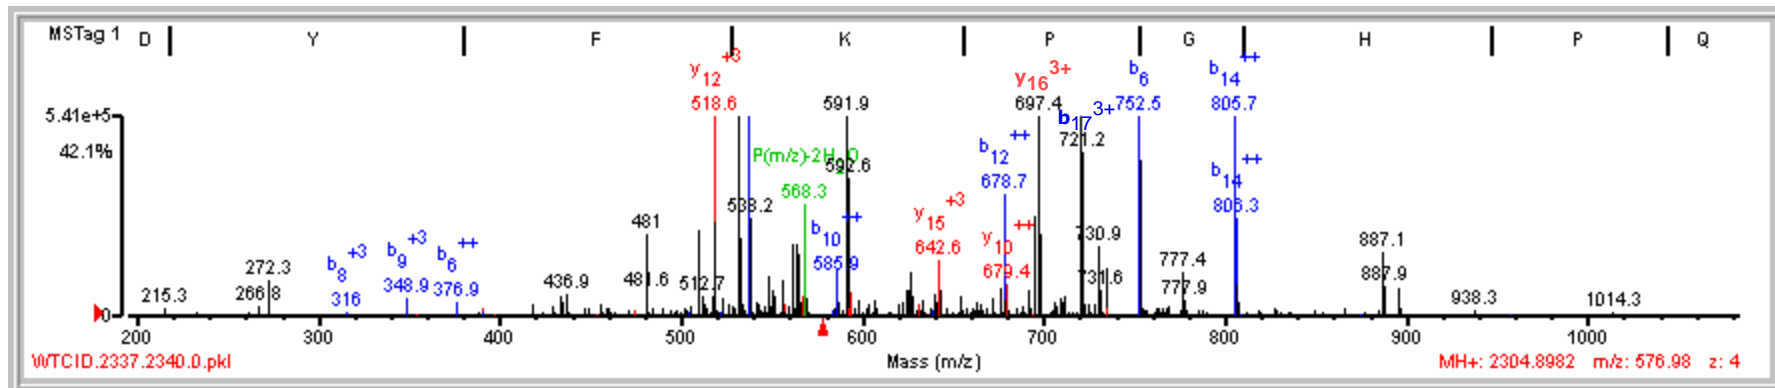

| Rank                   | Score  | SPI (%)                          | BCS                            | # Unmatched Ions             | Variable sites                 | Sequence                                        | MH <sup>+</sup> Calculated (Da) | MH <sup>+</sup> Error (Da) | MH <sup>+</sup> Error (ppm) | Protein MW/pl (Da)            | Species      | Accession #              | MS-Digest Index #     | Protein Name                      |                               |        |                                |                                |        |                                  |                |                               |                               |        |
|------------------------|--------|----------------------------------|--------------------------------|------------------------------|--------------------------------|-------------------------------------------------|---------------------------------|----------------------------|-----------------------------|-------------------------------|--------------|--------------------------|-----------------------|-----------------------------------|-------------------------------|--------|--------------------------------|--------------------------------|--------|----------------------------------|----------------|-------------------------------|-------------------------------|--------|
| 1                      | 12.50  | 76.8                             | 10                             | 8/24                         | Y516y S515s                    | (K) T D/Y/F E K/P I G H P Q/A/L/R V\H/s Y\K (S) | 2144.10                         | 160.7946                   | 374.0                       | 103537.6/5.51                 | Homo sapiens | <a href="#">31542530</a> | <a href="#">29159</a> | coiled-coil domain containing 135 |                               |        |                                |                                |        |                                  |                |                               |                               |        |
| Fragment-ion (m/z)     | 481.05 | 509.46                           | 518.64                         | 532.45                       | 537.70                         | 551.08                                          | 556.52                          | 561.76                     | 563.63                      | 585.90                        | 591.93       | 624.29                   | 627.30                | 642.59                            | 678.68                        | 695.55 | 697.39                         | 720.60                         | 730.88 | 734.38                           | 752.50         | 777.38                        | 805.72                        | 887.11 |
| Frac. Inten.(% of TIC) | 2.15   | 1.97                             | 8.26                           | 7.71                         | 9.84                           | 1.26                                            | 1.07                            | 1.57                       | 3.18                        | 2.21                          | 9.06         | 1.25                     | 1.63                  | 1.75                              | 3.59                          | 1.89   | 5.86                           | 13.29                          | 2.03   | 1.15                             | 8.75           | 1.36                          | 7.11                          | 2.06   |
| Rel. Inten.(% of BP)   | 16.19  | 14.79                            | 62.15                          | 58.02                        | 74.05                          | 9.51                                            | 8.02                            | 11.79                      | 23.92                       | 16.64                         | 68.22        | 9.40                     | 12.28                 | 13.15                             | 26.98                         | 14.24  | 44.13                          | 100.00                         | 15.30  | 8.66                             | 65.84          | 10.26                         | 53.47                         | 15.54  |
| Score                  | -0.16  | 0.50                             | 1.00                           | 1.00                         | 1.00                           | 1.00                                            | 1.00                            | -0.12                      | -0.24                       | 1.00                          | -0.68        | -0.09                    | 0.25                  | 1.00                              | 1.00                          | -0.14  | 1.00                           | 1.00                           | -0.15  | 0.50                             | 1.00           | 1.00                          | 1.00                          | -0.16  |
| Ion-type               |        | b <sub>4</sub> -H <sub>2</sub> O | y <sup>+++</sup> <sub>12</sub> | y <sup>++</sup> <sub>7</sub> | b <sup>+++</sup> <sub>14</sub> | y <sup>+++</sup> <sub>13</sub>                  | y <sub>3</sub>                  |                            |                             | b <sup>++</sup> <sub>10</sub> |              |                          | a <sub>5</sub>        | y <sup>+++</sup> <sub>15</sub>    | b <sup>++</sup> <sub>12</sub> |        | y <sup>+++</sup> <sub>16</sub> | b <sup>+++</sup> <sub>17</sub> |        | b <sub>6</sub> -H <sub>2</sub> O | b <sub>6</sub> | y <sup>++</sup> <sub>12</sub> | b <sup>++</sup> <sub>14</sub> |        |
| Delta Da               |        | 0.26                             | 0.41                           | 0.72                         | 0.08                           | 0.50                                            | -0.62                           |                            |                             | -0.38                         |              |                          | -0.01                 | 0.29                              | 0.34                          |        | 0.73                           | 0.62                           |        | 0.03                             | 0.14           | 0.54                          | -0.21                         |        |

# Peak 286

Ions that verify assignment

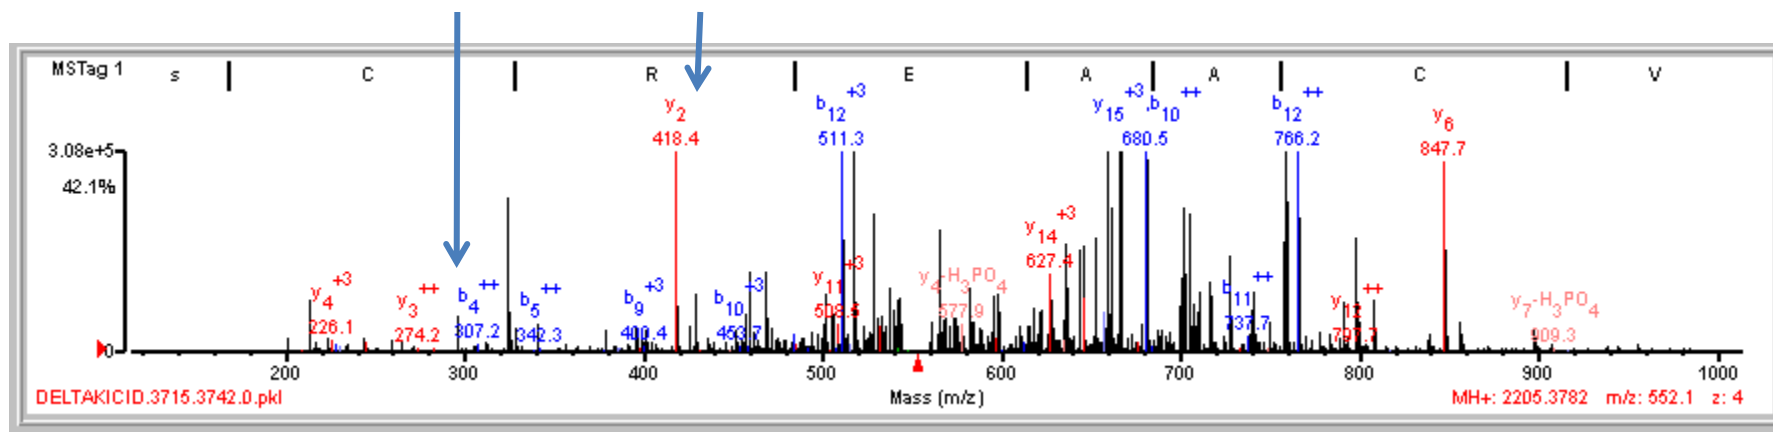

| Rank                    | Score  | SPI (%)        | BCS    | # Unmatched Ions               | Variable sites | Sequence                                  | MH <sup>+</sup> Calculated (Da) | MH <sup>+</sup> Error (Da)     | MH <sup>+</sup> Error (ppm) | Protein MW/pl (Da)           | Species      | Accession #                     | MS-Digest Index #               | Protein Name                                             |        |                                 |                |                                                 |        |                               |                               |                |        |
|-------------------------|--------|----------------|--------|--------------------------------|----------------|-------------------------------------------|---------------------------------|--------------------------------|-----------------------------|------------------------------|--------------|---------------------------------|---------------------------------|----------------------------------------------------------|--------|---------------------------------|----------------|-------------------------------------------------|--------|-------------------------------|-------------------------------|----------------|--------|
| 1                       | 9.06   | 70.0           | 7      | 9/23                           | Y199y S185s    | (K) s C/R E/A A/C/V W C I N G\ E /Y R (G) | 2046.82                         | 158.5567                       | -623.9                      | 80320.4/7.98                 | Homo sapiens | <a href="#">31543212</a>        | <a href="#">33170</a>           | macrophage stimulating 1 (hepatocyte growth factor-like) |        |                                 |                |                                                 |        |                               |                               |                |        |
| Fragment-ion (m/z)      | 324.25 | 418.35         | 468.63 | 511.31                         | 517.44         | 528.67                                    | 565.89                          | 627.42                         | 635.86                      | 645.99                       | 652.58       | 659.96                          | 666.47                          | 680.51                                                   | 702.00 | 704.99                          | 716.46         | 727.55                                          | 757.55 | 759.19                        | 766.22                        | 798.47         | 847.70 |
| Frac. Inten. (% of TIC) | 2.69   | 4.39           | 1.93   | 6.81                           | 4.83           | 2.56                                      | 2.56                            | 3.40                           | 3.81                        | 3.06                         | 2.33         | 6.97                            | 12.27                           | 9.48                                                     | 3.94   | 2.35                            | 2.19           | 2.82                                            | 1.79   | 5.55                          | 7.08                          | 2.63           | 4.57   |
| Rel. Inten. (% of BP)   | 21.97  | 35.83          | 15.70  | 55.50                          | 39.35          | 20.88                                     | 20.85                           | 27.72                          | 31.07                       | 24.95                        | 19.04        | 56.84                           | 100.00                          | 77.28                                                    | 32.09  | 19.13                           | 17.88          | 23.03                                           | 14.57  | 45.25                         | 57.72                         | 21.42          | 37.23  |
| Score                   | -0.22  | 1.00           | -0.16  | 1.00                           | -0.39          | 0.50                                      | -0.21                           | 1.00                           | -0.31                       | 1.00                         | -0.19        | 0.50                            | 0.50                            | 1.00                                                     | -0.32  | -0.19                           | 0.50           | 1.00                                            | 0.50   | -0.45                         | 1.00                          | 1.00           | 1.00   |
| Ion-type                |        | y <sub>2</sub> |        | b <sup>+++</sup> <sub>12</sub> |                | y <sub>3</sub> -H <sub>2</sub> O          |                                 | y <sup>+++</sup> <sub>14</sub> |                             | y <sup>++</sup> <sub>9</sub> |              | y <sub>4</sub> -NH <sub>3</sub> | b <sub>5</sub> -NH <sub>3</sub> | b <sup>++</sup> <sub>10</sub>                            |        | y <sub>5</sub> -NH <sub>3</sub> | a <sub>6</sub> | b <sup>++</sup> <sub>12</sub> -H <sub>2</sub> O |        | b <sup>++</sup> <sub>12</sub> | y <sup>++</sup> <sub>12</sub> | y <sub>6</sub> |        |
| Delta Da                |        | 0.20           |        | 0.13                           |                | -0.51                                     |                                 | 0.17                           |                             | -0.75                        |              | 0.75                            | -0.72                           | -0.23                                                    |        | 0.23                            | 0.29           | 0.29                                            |        | -0.05                         | 0.68                          | 0.40           |        |

# Peak 287

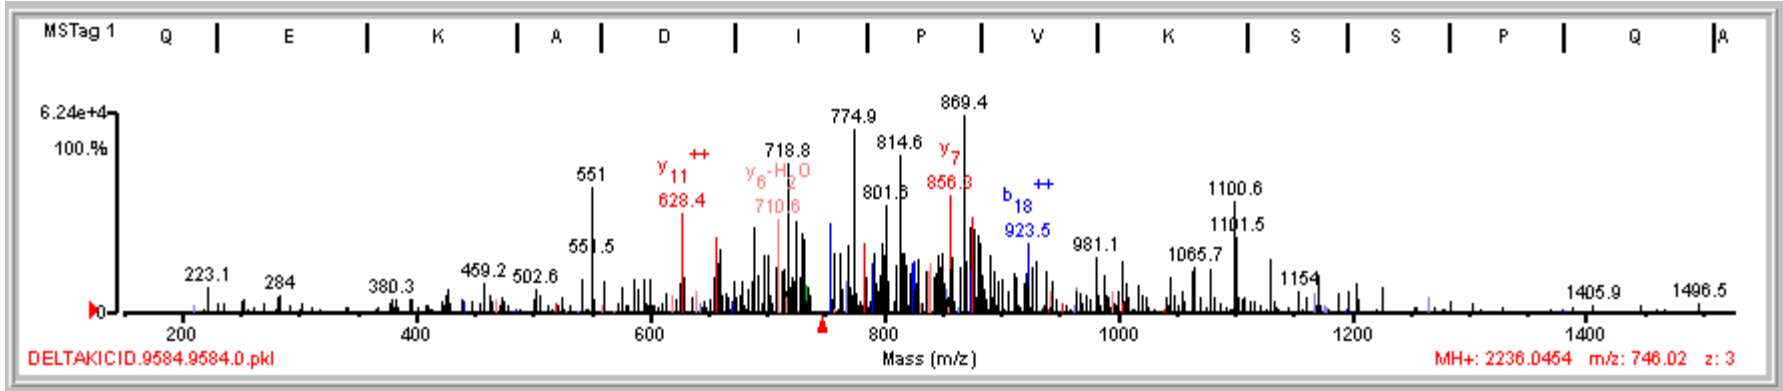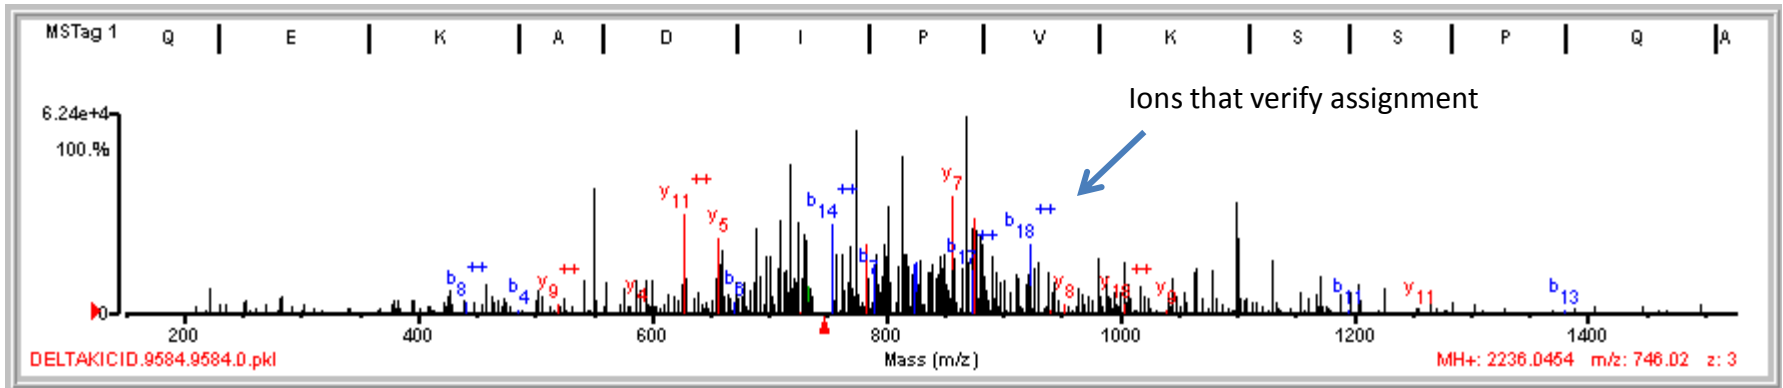

| Rank                    | Score                          | SPI (%)                        | BCS            | # Unmatched Ions               | Variable sites                  | Sequence                                        | MH* Calculated (Da) | MH* Error (Da) | MH* Error (ppm)                | Protein MW/pI (Da) | Species                        | Accession #                    | MS-Digest Index #     | Protein Name                      |                                |        |                |        |        |                                |                |        |                                |         |
|-------------------------|--------------------------------|--------------------------------|----------------|--------------------------------|---------------------------------|-------------------------------------------------|---------------------|----------------|--------------------------------|--------------------|--------------------------------|--------------------------------|-----------------------|-----------------------------------|--------------------------------|--------|----------------|--------|--------|--------------------------------|----------------|--------|--------------------------------|---------|
| 1                       | 7.63                           | 49.3                           | 11             | 10/24                          | Y615y                           | (K) V/Q E K/A D/I P/V/K S S P/Q/A I/V P/Y/K (K) | 2155.18             | 80.8697        | 404.0                          | 123563.5/6.97      | Homo sapiens                   | <a href="#">31563503</a>       | <a href="#">618</a>   | activity-dependent neuroprotector |                                |        |                |        |        |                                |                |        |                                |         |
| 1                       | 7.63                           | 49.3                           | 11             | 10/24                          | Y615y                           | (K) V/Q E K/A D/I P/V/K S S P/Q/A I/V P/Y/K (K) | 2155.18             | 80.8697        | 404.0                          | 123563.5/6.97      | Homo sapiens                   | <a href="#">12229217</a>       | <a href="#">20994</a> | activity-dependent neuroprotector |                                |        |                |        |        |                                |                |        |                                |         |
| Fragment-ion (m/z)      | 550.97                         | 628.41                         | 657.39         | 697.16                         | 710.55                          | 712.94                                          | 718.83              | 731.18         | 754.08                         | 774.89             | 783.08                         | 790.12                         | 801.55                | 814.60                            | 825.09                         | 848.74 | 856.26         | 869.36 | 873.32 | 876.35                         | 881.00         | 882.77 | 923.53                         | 1100.57 |
| Frac. Inten. (% of TIC) | 5.30                           | 3.69                           | 3.92           | 2.65                           | 2.69                            | 0.08                                            | 5.48                | 4.17           | 3.58                           | 5.01               | 4.65                           | 3.02                           | 5.65                  | 6.55                              | 3.67                           | 2.96   | 5.23           | 6.87   | 3.96   | 4.87                           | 3.17           | 4.18   | 2.82                           | 5.82    |
| Rel. Inten. (% of BP)   | 77.04                          | 53.61                          | 57.03          | 38.55                          | 39.20                           | 1.20                                            | 79.73               | 60.67          | 52.01                          | 72.90              | 67.70                          | 44.00                          | 82.25                 | 95.31                             | 53.39                          | 43.06  | 76.06          | 100.00 | 57.54  | 70.91                          | 46.04          | 60.83  | 40.95                          | 84.73   |
| Score                   | 1.00                           | 1.00                           | 1.00           | 1.00                           | 0.50                            | 1.50                                            | -0.80               | -0.61          | 1.00                           | -0.73              | 1.00                           | 1.00                           | -0.82                 | -0.95                             | 1.00                           | -0.43  | 1.00           | 1.00   | -0.58  | 1.00                           | 1.00           | -0.61  | 1.00                           | -0.85   |
| Ion-type                | b <sup>+++</sup> <sub>18</sub> | y <sup>+++</sup> <sub>11</sub> | y <sub>5</sub> | b <sup>+++</sup> <sub>19</sub> | y <sub>e</sub> -NH <sub>3</sub> | y <sup>+++</sup> <sub>19</sub>                  |                     |                | b <sup>+++</sup> <sub>14</sub> |                    | y <sup>+++</sup> <sub>14</sub> | b <sup>+++</sup> <sub>15</sub> |                       |                                   | b <sup>+++</sup> <sub>1e</sub> |        | y <sub>7</sub> |        |        | y <sup>+++</sup> <sub>1e</sub> | b <sub>8</sub> |        | b <sup>+++</sup> <sub>18</sub> |         |
| Delta Da                | 0.34                           | 0.10                           | 0.09           | 0.14                           | -0.76                           | 0.24                                            |                     |                | -0.33                          |                    | 0.17                           | 0.19                           |                       |                                   | -0.36                          |        | -0.14          |        |        | 0.41                           | -0.47          |        | 0.02                           |         |

# Peak 289

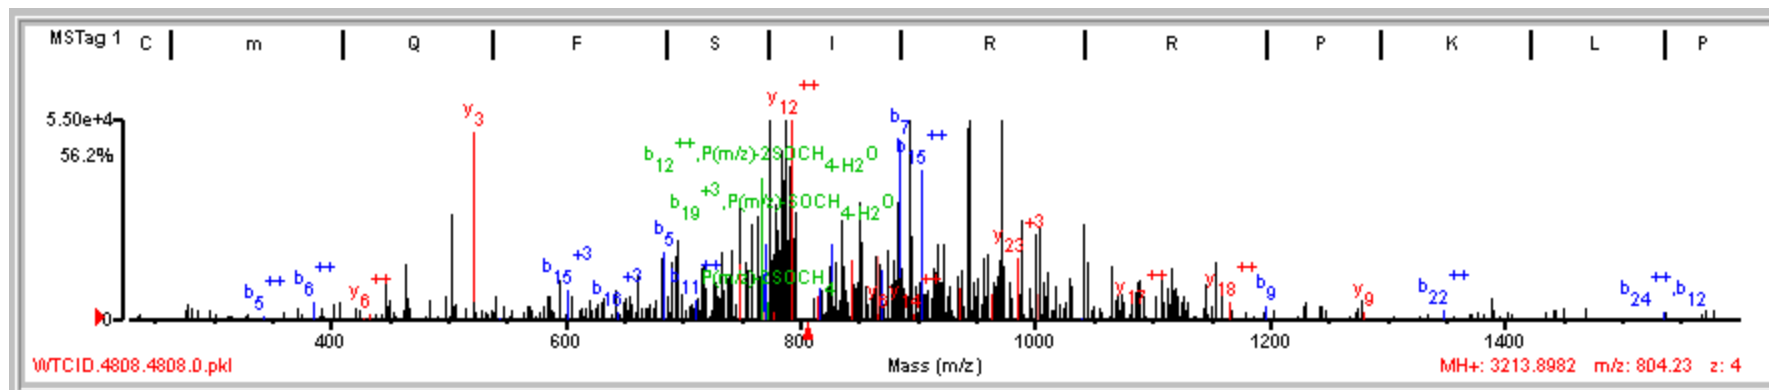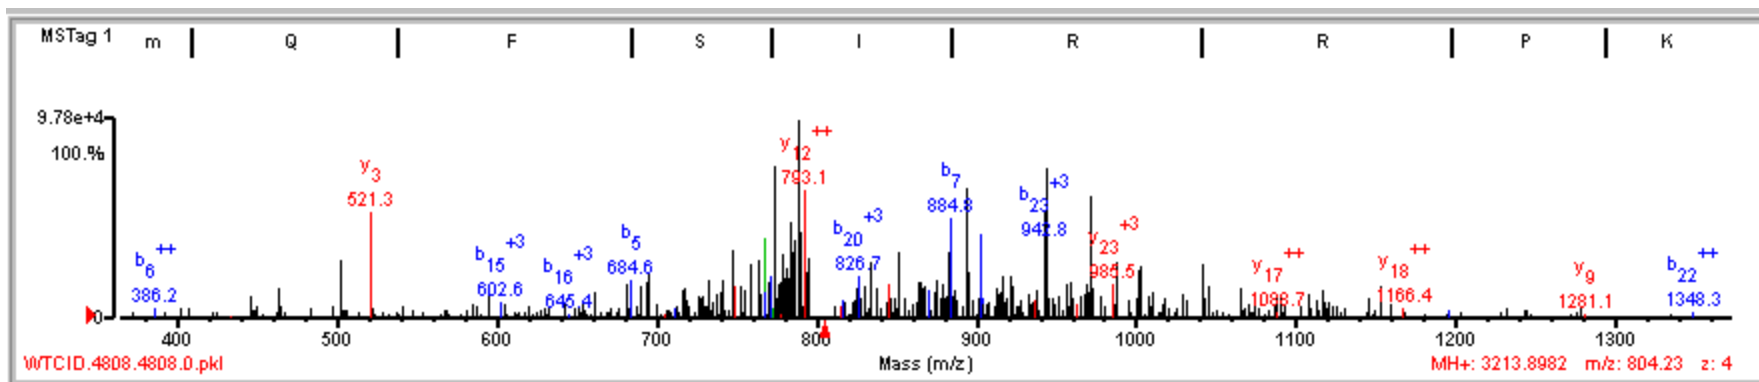

| Rank                    | Score                        | SPI (%) | BCS                           | # Unmatched Ions               | Variable sites    | Sequence                                                                        | MH* Calculated (Da) | MH* Error (Da) | MH* Error (ppm)                | Protein MW/pl (Da) | Species      | Accession #                    | MS-Digest Index #              | Protein Name                  |                |                                                 |                                |                                |        |
|-------------------------|------------------------------|---------|-------------------------------|--------------------------------|-------------------|---------------------------------------------------------------------------------|---------------------|----------------|--------------------------------|--------------------|--------------|--------------------------------|--------------------------------|-------------------------------|----------------|-------------------------------------------------|--------------------------------|--------------------------------|--------|
| 1                       | 10.94                        | 64.7    | 10                            | 6/19                           | M372m T386t Y393y | (K) T C m Q / F / S I \ R \ R P K L \ P / S / S \ E t H P \ E E S / M \ Y K (R) | 3039.45             | 174.4497       | -459.9                         | 86372.2/5.54       | Homo sapiens | <a href="#">33563376</a>       | <a href="#">4447</a>           | TBC1 domain family, member 16 |                |                                                 |                                |                                |        |
| Fragment-ion (m/z)      | 521.34                       | 694.57  | 748.51                        | 767.61                         | 770.28            | 774.03                                                                          | 779.16              | 781.18         | 784.58                         | 788.75             | 791.09       | 793.06                         | 844.92                         | 851.32                        | 883.66         | 894.21                                          | 903.52                         | 943.57                         | 972.44 |
| Frac. Inten. (% of TIC) | 5.24                         | 3.76    | 4.31                          | 0.14                           | 0.12              | 8.42                                                                            | 0.14                | 7.03           | 10.40                          | 0.32               | 4.26         | 5.47                           | 3.72                           | 4.74                          | 8.19           | 8.73                                            | 5.39                           | 12.56                          | 7.06   |
| Rel. Inten. (% of BP)   | 41.75                        | 29.98   | 34.36                         | 1.14                           | 0.93              | 67.04                                                                           | 1.09                | 55.95          | 82.81                          | 2.51               | 33.95        | 43.58                          | 29.66                          | 37.72                         | 65.25          | 69.48                                           | 42.96                          | 100.00                         | 56.18  |
| Score                   | 1.00                         | -0.30   | 1.00                          | 2.00                           | 0.25              | -0.67                                                                           | 1.50                | -0.56          | 1.00                           | 2.00               | -0.34        | 1.00                           | 1.00                           | -0.38                         | 1.00           | 1.00                                            | 1.00                           | 1.00                           | -0.56  |
| Ion-type                | b <sup>++</sup> <sub>8</sub> |         | y <sup>++</sup> <sub>11</sub> | b <sup>+++</sup> <sub>12</sub> | st                |                                                                                 | sty                 |                | b <sup>+++</sup> <sub>19</sub> | m                  |              | y <sup>+++</sup> <sub>12</sub> | y <sup>+++</sup> <sub>20</sub> |                               | b <sub>7</sub> | b <sup>++</sup> <sub>16</sub> -H <sub>2</sub> O | b <sup>+++</sup> <sub>15</sub> | b <sup>+++</sup> <sub>23</sub> |        |
| Delta Da                | 0.60                         |         | -0.74                         | -0.29                          | -0.82             |                                                                                 | -0.95               |                | 0.55                           | 0.15               |              | 0.29                           | 0.20                           |                               | -0.70          | -0.25                                           | 0.06                           | 0.82                           |        |
|                         | y <sub>3</sub>               |         |                               | m                              |                   |                                                                                 |                     |                |                                |                    |              |                                |                                |                               |                | y <sup>+++</sup> <sub>21</sub>                  |                                |                                |        |
|                         | 0.16                         |         |                               |                                |                   |                                                                                 |                     |                |                                |                    |              |                                |                                |                               |                | 0.47                                            |                                |                                |        |





# Peak 291

Ions that verify assignment

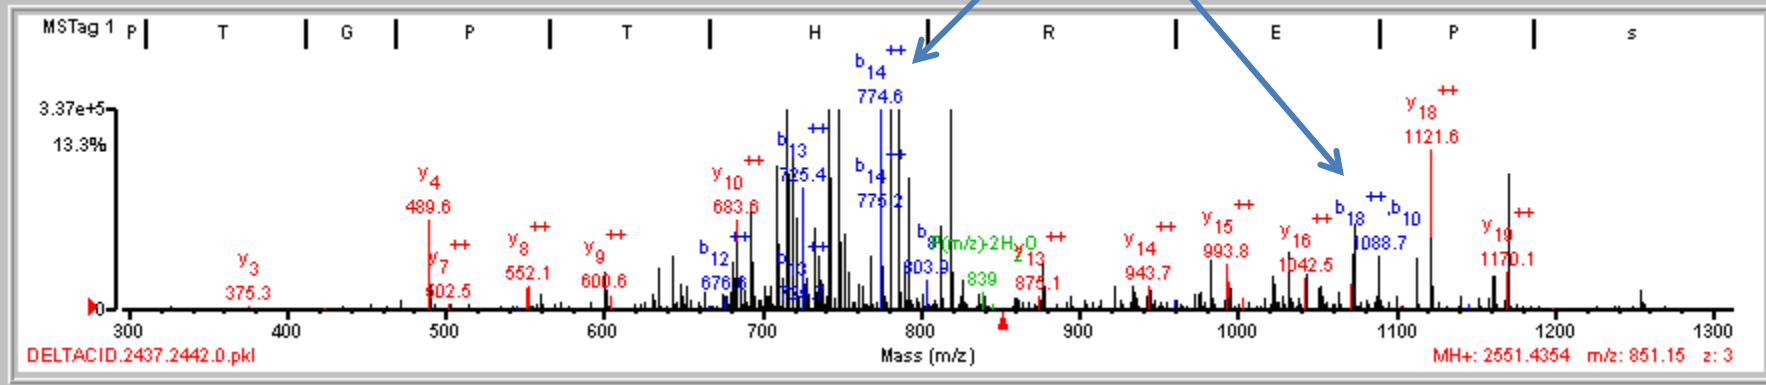

| Rank                    | Score          | SPI (%)                       | BCS    | # Unmatched Ions | Variable sites                                  | Sequence                                               | MH <sup>+</sup> Calculated (Da) | MH <sup>+</sup> Error (Da)    | MH <sup>+</sup> Error (ppm)   | Protein MW/pl (Da) | Species      | Accession #              | MS-Digest Index #              | Protein Name                          |                                |        |        |        |        |                               |                               |         |                               |                               |                               |
|-------------------------|----------------|-------------------------------|--------|------------------|-------------------------------------------------|--------------------------------------------------------|---------------------------------|-------------------------------|-------------------------------|--------------------|--------------|--------------------------|--------------------------------|---------------------------------------|--------------------------------|--------|--------|--------|--------|-------------------------------|-------------------------------|---------|-------------------------------|-------------------------------|-------------------------------|
| 1                       | 14.15          | 78.3                          | 8      | 9/25             | Y533y S529s                                     | (R) L V/P/T G P/T H R R E   P/s P\V\R y D\N\ L S R (H) | 2391.25                         | 160.1827                      | 98.0                          | 77545.1/9.17       | Homo sapiens | <a href="#">41152072</a> | <a href="#">21325</a>          | zinc finger, DHHC domain containing 5 |                                |        |        |        |        |                               |                               |         |                               |                               |                               |
| Fragment-ion (m/z)      | 489.55         | 683.59                        | 692.46 | 709.80           | 715.58                                          | 719.35                                                 | 721.63                          | 725.41                        | 733.02                        | 736.25             | 742.28       | 748.07                   | 774.64                         | 780.77                                | 786.25                         | 792.30 | 812.75 | 818.78 | 876.83 | 993.80                        | 1032.52                       | 1073.55 | 1088.69                       | 1121.55                       | 1170.61                       |
| Frac. Inten. (% of TIC) | 1.47           | 1.98                          | 2.15   | 2.94             | 9.17                                            | 2.38                                                   | 1.84                            | 1.99                          | 1.85                          | 1.29               | 5.97         | 25.66                    | 7.05                           | 18.83                                 | 0.18                           | 2.17   | 0.04   | 0.30   | 1.50   | 1.44                          | 1.20                          | 1.46    | 1.64                          | 3.47                          | 2.04                          |
| Rel. Inten. (% of BP)   | 5.74           | 7.73                          | 8.37   | 11.47            | 35.73                                           | 9.28                                                   | 7.18                            | 7.77                          | 7.19                          | 5.01               | 23.27        | 100.00                   | 27.48                          | 73.40                                 | 0.70                           | 8.46   | 0.16   | 1.16   | 5.84   | 5.61                          | 4.68                          | 5.68    | 6.38                          | 13.50                         | 7.95                          |
| Score                   | 1.00           | 1.00                          | -0.08  | -0.11            | 0.50                                            | -0.09                                                  | -0.07                           | 1.00                          | 1.00                          | -0.05              | -0.23        | 1.00                     | 1.00                           | 1.00                                  | 1.00                           | -0.08  |        | 1.50   | -0.06  | 1.00                          | 1.00                          | -0.06   | 1.00                          | 1.00                          | 1.00                          |
| Ion-type                | y <sub>4</sub> | y <sup>++</sup> <sub>10</sub> |        |                  | b <sup>++</sup> <sub>13</sub> -H <sub>2</sub> O |                                                        |                                 | b <sup>++</sup> <sub>13</sub> | y <sup>++</sup> <sub>11</sub> |                    |              |                          | y <sup>+++</sup> <sub>18</sub> | b <sup>++</sup> <sub>14</sub>         | y <sup>+++</sup> <sub>19</sub> | st     |        | st     | sty    | y <sup>++</sup> <sub>15</sub> | b <sup>++</sup> <sub>17</sub> |         | b <sub>10</sub>               | y <sup>++</sup> <sub>18</sub> | y <sup>++</sup> <sub>19</sub> |
| Delta Da                | 0.27           | -0.19                         |        |                  | -0.76                                           |                                                        |                                 | 0.06                          | 0.71                          |                    |              |                          | 0.07                           | -0.24                                 | 0.42                           | 0.50   |        | 0.37   |        | -0.13                         | 0.56                          |         | 0.11                          | 0.06                          | 0.59                          |
|                         |                |                               |        |                  |                                                 |                                                        |                                 |                               |                               |                    |              |                          |                                |                                       |                                |        |        |        |        |                               |                               |         | b <sup>++</sup> <sub>18</sub> |                               |                               |
|                         |                |                               |        |                  |                                                 |                                                        |                                 |                               |                               |                    |              |                          |                                |                                       |                                |        |        |        |        |                               |                               |         | -0.29                         |                               |                               |







# Peak 297

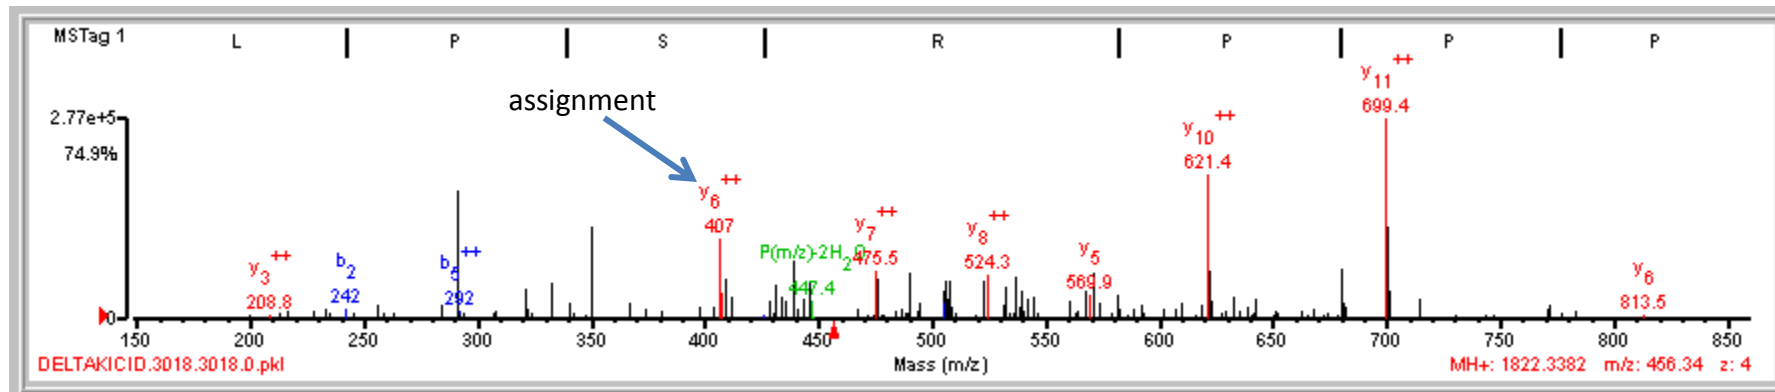

| Rank                    | Score            | SPI (%)                         | BCS               | # Unmatched Ions  | Variable sites                  | Sequence                               | MH <sup>+</sup> Calculated (Da) | MH <sup>+</sup> Error (Da) | MH <sup>+</sup> Error (ppm) | Protein MW/pI (Da) | Species            | Accession #             | MS-Digest Index #     | Protein Name   |                    |        |                    |
|-------------------------|------------------|---------------------------------|-------------------|-------------------|---------------------------------|----------------------------------------|---------------------------------|----------------------------|-----------------------------|--------------------|--------------------|-------------------------|-----------------------|----------------|--------------------|--------|--------------------|
| 1                       | 11.41            | 86.3                            | 7                 | 4/17              | Y197y                           | (R)K L P S/R P P/P/H I Y/P G I\K R (K) | 1743.02                         | 79.3205                    | -354.4                      | 237296.2/5.45      | Homo sapiens       | <a href="#">4503431</a> | <a href="#">16661</a> | dysterlin      |                    |        |                    |
| Fragment-ion (m/z)      | 291.16           | 321.59                          | 350.32            | 406.96            | 409.22                          | 439.24                                 | 475.51                          | 490.25                     | 505.02                      | 506.34             | 508.17             | 524.26                  | 536.93                | 569.92         | 621.35             | 680.50 | 699.42             |
| Frac. Inten. (% of TIC) | 8.54             | 2.56                            | 8.73              | 6.52              | 2.45                            | 3.47                                   | 5.35                            | 2.85                       | 2.71                        | 3.56               | 3.10               | 2.72                    | 2.53                  | 4.35           | 12.64              | 4.82   | 23.12              |
| Rel. Inten. (% of BP)   | 36.93            | 11.06                           | 37.77             | 28.21             | 10.60                           | 15.01                                  | 23.12                           | 12.32                      | 11.70                       | 15.42              | 13.40              | 11.75                   | 10.95                 | 18.81          | 54.66              | 20.84  | 100.00             |
| Score                   | 1.00             | 0.50                            | 1.00              | 1.00              | 0.50                            | -0.15                                  | 1.00                            | -0.12                      | 1.00                        | 1.00               | 1.00               | 1.00                    | -0.11                 | 1.00           | 1.00               | -0.21  | 1.00               |
| Ion-type                | b <sup>++5</sup> | b <sub>3</sub> -NH <sub>3</sub> | y <sup>+++8</sup> | y <sup>+++6</sup> | b <sub>4</sub> -NH <sub>3</sub> |                                        | y <sup>+++7</sup>               |                            | b <sup>+++9</sup>           | b <sup>+++9</sup>  | b <sup>+++13</sup> | y <sup>+++8</sup>       |                       | y <sub>5</sub> | y <sup>+++10</sup> |        | y <sup>+++11</sup> |
| Delta Da                | -0.53            | -0.62                           | 0.48              | -0.24             | -0.02                           |                                        | -0.22                           |                            | -0.78                       | 0.54               | 0.57               | -0.00                   |                       | -0.45          | 0.04               |        | 0.06               |

# Peak 298

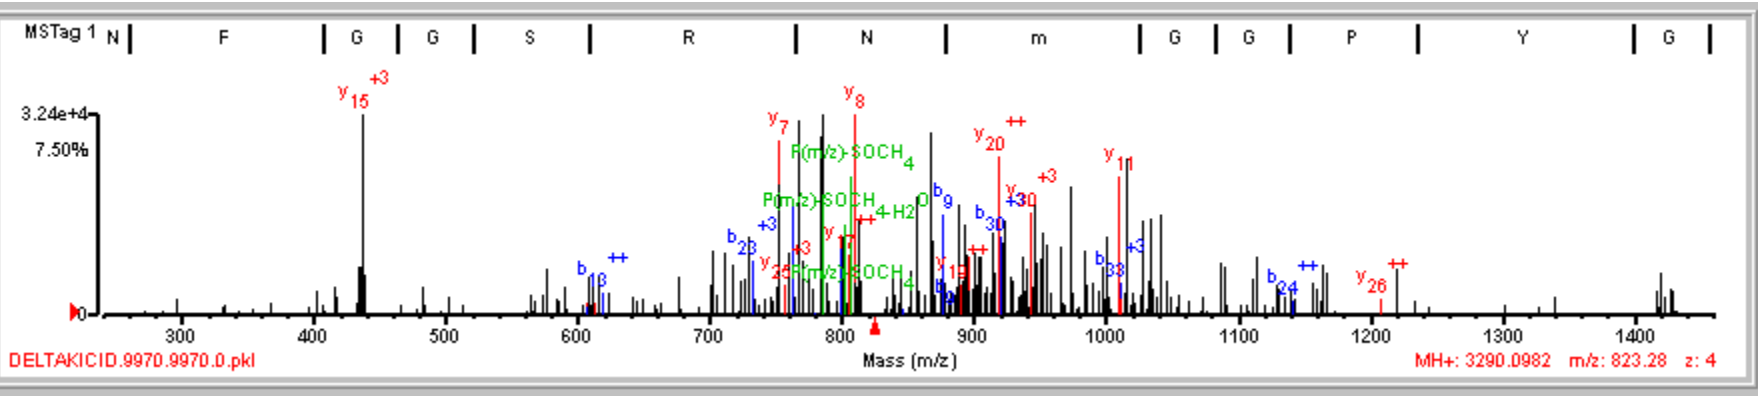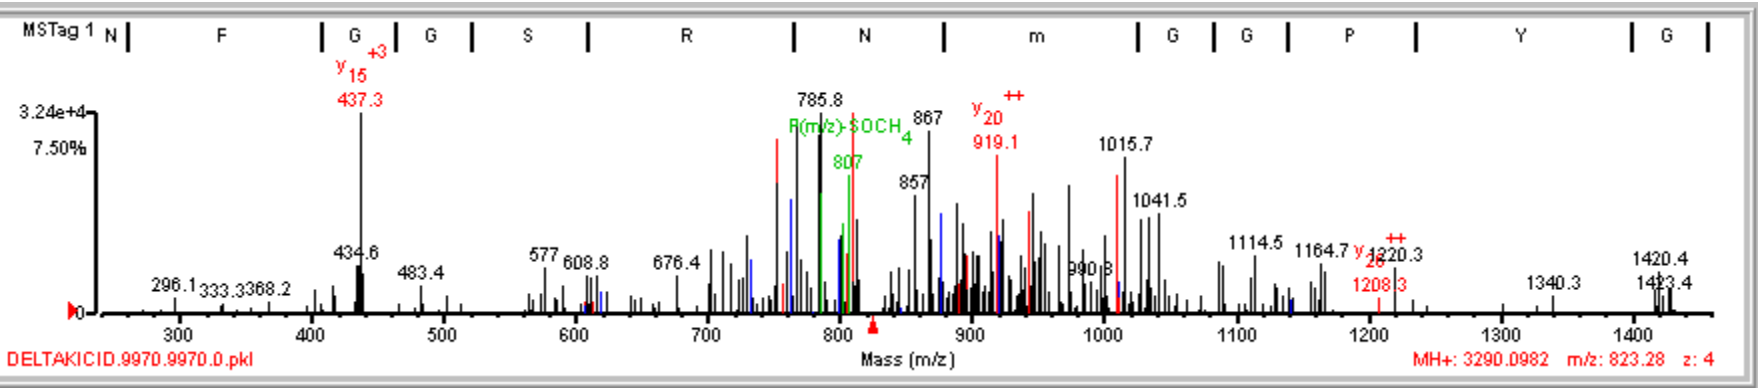

| Rank | Score | SPI (%) | BCS | # Unmatched Ions | Variable sites | Sequence                                                                      | MH <sup>+</sup> Calculated (Da) | MH <sup>+</sup> Error (Da) | MH <sup>+</sup> Error (ppm) | Protein MW/pi (Da) | Species      | Accession #              | MS-Digest Index #     | Protein Name                                             |
|------|-------|---------|-----|------------------|----------------|-------------------------------------------------------------------------------|---------------------------------|----------------------------|-----------------------------|--------------------|--------------|--------------------------|-----------------------|----------------------------------------------------------|
| 1    | 12.46 | 77.2    | 10  | 9/21             | M315m Y324y    | (K) S G N F G/G S R N m G G P Y G/G G N Y G/P G G S/G G S/G/G Y G G R S R (Y) | 3195.38                         | 94.7188                    | -377.6                      | 36006.1/8.67       | Homo sapiens | <a href="#">4504447</a>  | <a href="#">15070</a> | heterogeneous nuclear ribonucleoprotein A2/B1 isoform A2 |
| 1    | 12.46 | 77.2    | 10  | 9/21             | M327m Y336y    | (K) S G N F G/G S R N m G G P Y G/G G N Y G/P G G S/G G S/G/G Y G G R S R (Y) | 3195.38                         | 94.7188                    | -377.6                      | 37429.9/8.97       | Homo sapiens | <a href="#">14043072</a> | <a href="#">17847</a> | heterogeneous nuclear ribonucleoprotein A2/B1 isoform B1 |

| Fragment-ion (m/z)     | 437.26             | 751.96         | 763.50         | 768.05 | 784.53            | 785.82            | 801.48 | 806.98 | 809.28         | 856.39 | 866.98             | 877.30         | 888.79 | 893.11 | 903.97 | 919.08            | 943.91             | 951.27 | 973.18 | 1010.19         | 1015.71 |
|------------------------|--------------------|----------------|----------------|--------|-------------------|-------------------|--------|--------|----------------|--------|--------------------|----------------|--------|--------|--------|-------------------|--------------------|--------|--------|-----------------|---------|
| Frac. Inten.(% of TIC) | 42.37              | 4.44           | 1.93           | 2.83   | 2.61              | 6.38              | 3.21   | 0.07   | 3.86           | 3.17   | 4.00               | 2.05           | 2.60   | 2.21   | 2.46   | 4.80              | 1.92               | 2.04   | 2.01   | 2.75            | 2.28    |
| Rel. Inten.(% of BP)   | 100.00             | 10.49          | 4.57           | 6.67   | 6.17              | 15.06             | 7.59   | 0.16   | 9.12           | 7.47   | 9.44               | 4.83           | 6.14   | 5.22   | 5.80   | 11.33             | 4.54               | 4.81   | 4.75   | 6.48            | 5.38    |
| Score                  | 1.00               | 1.00           | 1.00           | -0.07  | 1.00              | 1.00              | -0.08  | 2.00   | 1.00           | -0.07  | 1.00               | 1.00           | -0.06  | -0.05  | -0.06  | 1.00              | 1.00               | -0.05  | -0.05  | 1.00            | -0.05   |
| Ion-type               | y+++ <sub>16</sub> | y <sub>7</sub> | b <sub>8</sub> |        | b++ <sub>17</sub> | b++ <sub>17</sub> |        | m      | y <sub>8</sub> |        | b+++ <sub>29</sub> | b <sub>9</sub> |        |        |        | y++ <sub>20</sub> | y+++ <sub>30</sub> |        |        | y <sub>11</sub> |         |
| Delta Da               | 0.39               | -0.42          | 0.15           |        | -0.80             | 0.49              |        | -0.61  | -0.12          |        | 0.65               | -0.09          |        |        |        | 0.21              | 0.19               |        |        | -0.29           |         |





# Peak 300

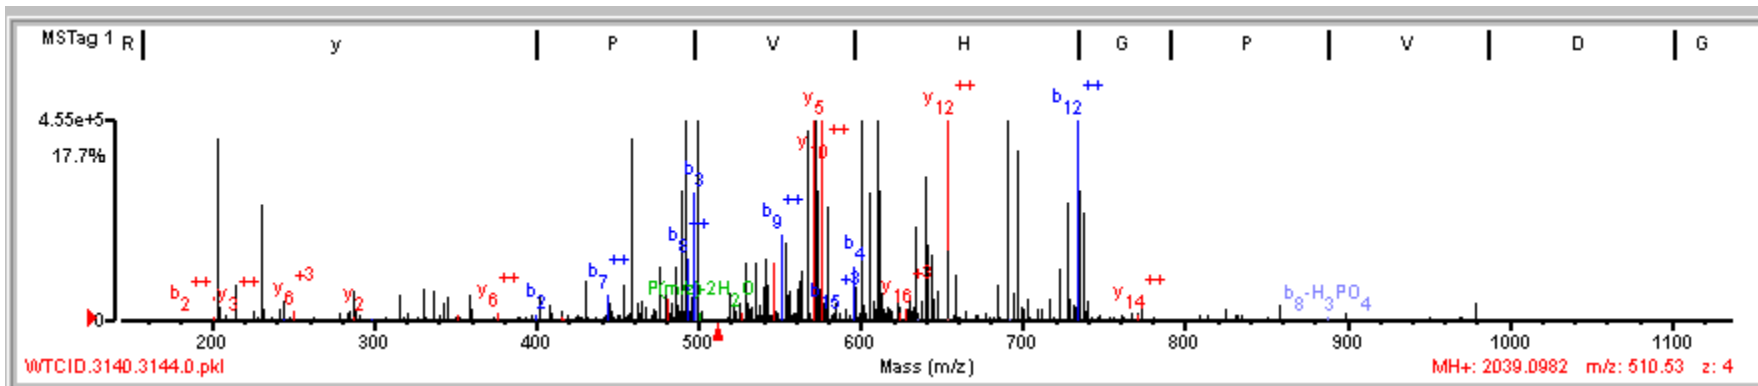

WTCID:3140.3144.0.pkl

MH+: 2039.0982 m/z: 510.53 z: 4

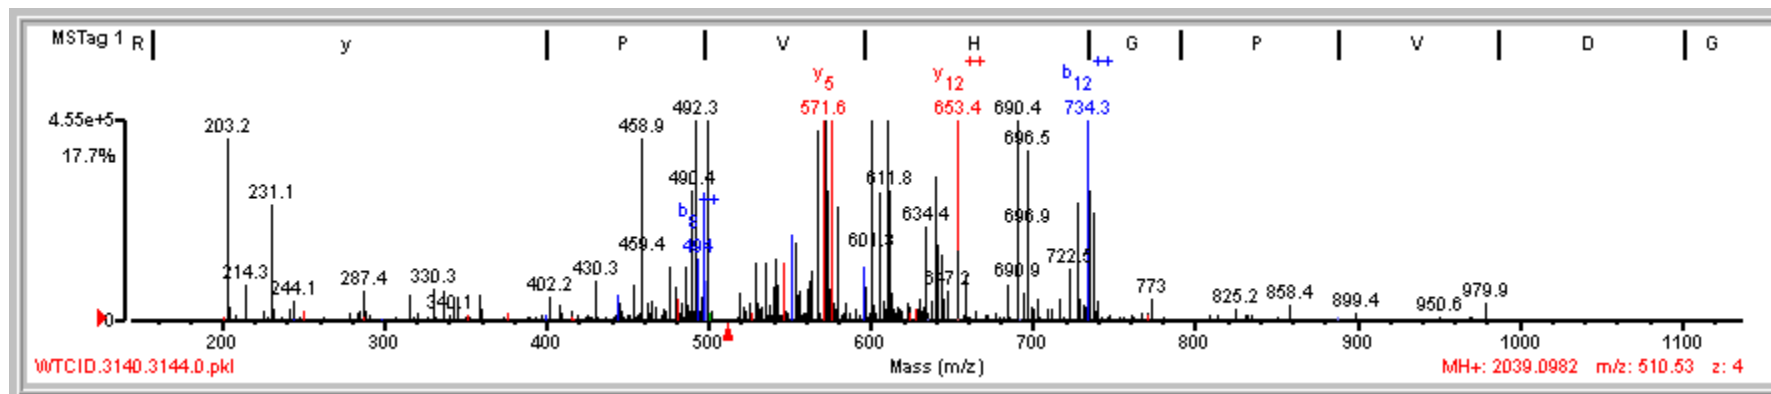

WTCID:3140.3144.0.pkl

MH+: 2039.0982 m/z: 510.53 z: 4

| Rank                    | Score  | SPI (%) | BCS            | # Unmatched Ions               | Variable sites | Sequence                                   | MH <sup>+</sup> Calculated (Da)                 | MH <sup>+</sup> Error (Da)    | MH <sup>+</sup> Error (ppm)     | Protein MW/pl (Da) | Species                                          | Accession #             | MS-Digest Index #              | Protein Name                    |                |        |        |        |        |                                |        |        |        |                                |        |
|-------------------------|--------|---------|----------------|--------------------------------|----------------|--------------------------------------------|-------------------------------------------------|-------------------------------|---------------------------------|--------------------|--------------------------------------------------|-------------------------|--------------------------------|---------------------------------|----------------|--------|--------|--------|--------|--------------------------------|--------|--------|--------|--------------------------------|--------|
| 1                       | 9.06   | 60.2    | 8              | 12/25                          | T137t Y127y    | (R)R y P V H G P V D G K t I L G L L R (K) | 1878.07                                         | 161.0273                      | 536.8                           | 119116.8/8.96      | Homo sapiens                                     | <a href="#">4557841</a> | <a href="#">12229</a>          | recombination activating gene 1 |                |        |        |        |        |                                |        |        |        |                                |        |
| Fragment-ion (m/z)      | 203.21 | 231.13  | 458.94         | 490.43                         | 492.33         | 497.48                                     | 542.13                                          | 551.09                        | 554.02                          | 562.75             | 567.24                                           | 571.64                  | 575.87                         | 580.49                          | 596.31         | 600.90 | 605.29 | 611.24 | 640.19 | 653.35                         | 690.42 | 696.49 | 728.21 | 734.33                         | 738.08 |
| Frac. Inten. (% of TIC) | 2.66   | 1.64    | 3.07           | 1.74                           | 3.63           | 2.10                                       | 1.31                                            | 2.03                          | 2.58                            | 1.33               | 2.78                                             | 16.33                   | 16.27                          | 1.42                            | 1.52           | 4.15   | 1.97   | 8.43   | 4.65   | 4.12                           | 3.72   | 3.61   | 2.23   | 4.90                           | 1.81   |
| Rel. Inten. (% of BP)   | 16.32  | 10.03   | 18.80          | 10.69                          | 22.25          | 12.89                                      | 8.02                                            | 12.45                         | 15.80                           | 8.13               | 17.05                                            | 100.00                  | 99.67                          | 8.67                            | 9.31           | 25.40  | 12.09  | 51.62  | 28.47  | 25.26                          | 22.80  | 22.11  | 13.67  | 29.99                          | 11.06  |
| Score                   | -0.16  | -0.10   | 1.00           | 1.00                           | -0.22          | 1.00                                       | 0.50                                            | 1.00                          | 0.50                            | -0.08              | 0.50                                             | 1.00                    | 1.00                           | 1.00                            | 1.00           | -0.25  | -0.12  | -0.52  | -0.28  | 1.00                           | -0.23  | -0.22  | -0.14  | 1.00                           | -0.11  |
| Ion-type                |        |         | y <sub>4</sub> | b <sup>+++</sup> <sub>12</sub> |                | b <sub>3</sub>                             | b <sup>+++</sup> <sub>9</sub> -H <sub>2</sub> O | b <sup>+++</sup> <sub>9</sub> | y <sub>5</sub> -NH <sub>3</sub> |                    | y <sup>+++</sup> <sub>10</sub> -H <sub>2</sub> O | y <sub>5</sub>          | y <sup>+++</sup> <sub>10</sub> | b <sup>+++</sup> <sub>10</sub>  | b <sub>4</sub> |        |        |        |        | y <sup>+++</sup> <sub>12</sub> |        |        |        | b <sup>+++</sup> <sub>12</sub> |        |
| Delta Da                |        |         | 0.63           | 0.55                           |                | 0.29                                       | -0.11                                           | -0.16                         | -0.35                           |                    | -0.07                                            | 0.25                    | -0.44                          | 0.73                            | 0.05           |        |        |        |        | 0.00                           |        |        |        | 0.02                           |        |

# Peak 301

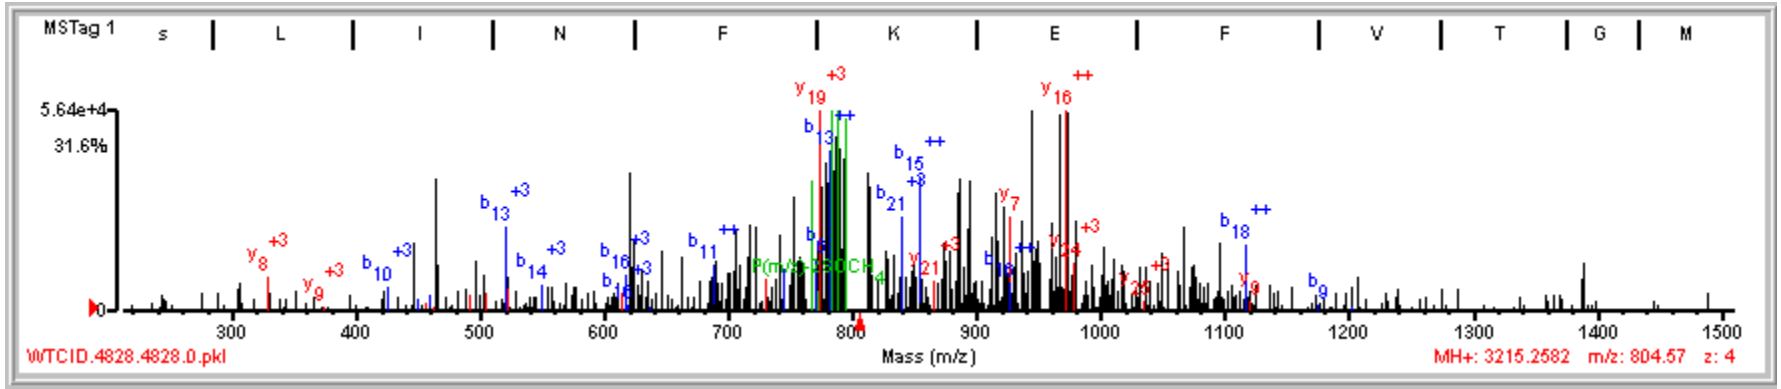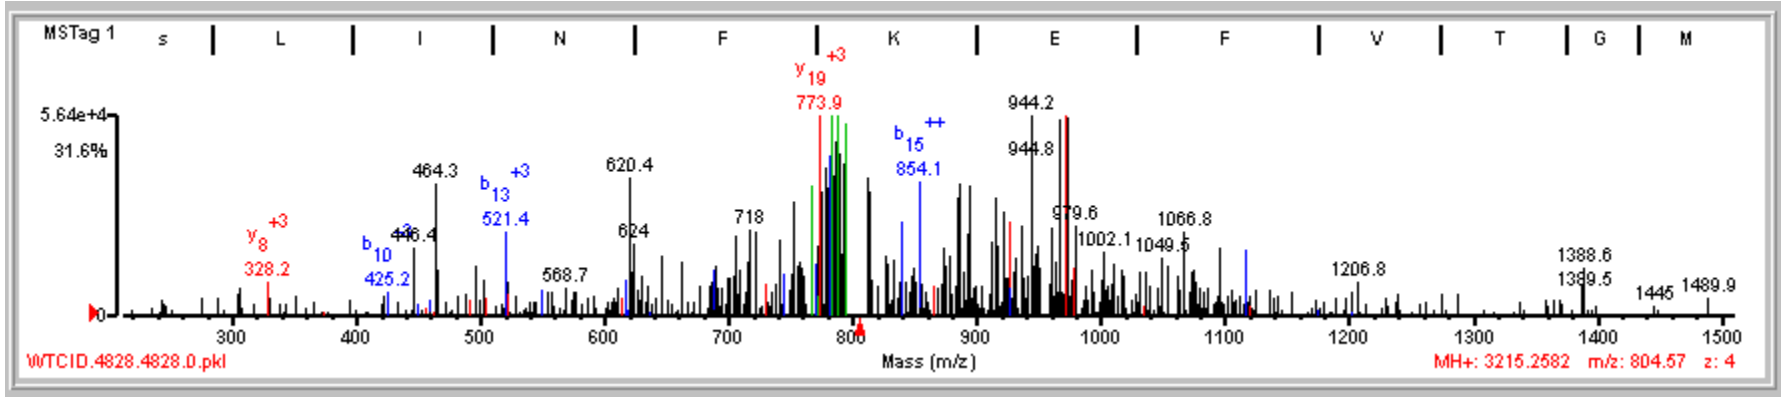

## Detailed Results

| Rank | Score | SPI (%) | BCS | # Unmatched Ions | Variable sites          | Sequence                                                    | MH* Calculated (Da) | MH* Error (Da) | MH* Error (ppm) | Protein MW/pi (Da) | Species      | Accession #              | MS-Digest Index #     | Protein Name                                               |
|------|-------|---------|-----|------------------|-------------------------|-------------------------------------------------------------|---------------------|----------------|-----------------|--------------------|--------------|--------------------------|-----------------------|------------------------------------------------------------|
| 1    | 14.50 | 69.2    | 12  | 9/25             | M911m T917t Y912y S897s | (K) D S L I N F K E F V T G M S G m Y H G D L t E K L K (V) | 2960.45             | 254.8049       | -338.7          | 138670.4/5.20      | Homo sapiens | <a href="#">45597177</a> | <a href="#">1931</a>  | TBC1 domain family, member 9B (with GRAM domain) isoform b |
| 1    | 14.50 | 69.2    | 12  | 9/25             | M911m T917t Y912y S897s | (K) D S L I N F K E F V T G M S G m Y H G D L t E K L K (V) | 2960.45             | 254.8049       | -338.7          | 140525.5/5.14      | Homo sapiens | <a href="#">45597175</a> | <a href="#">37136</a> | TBC1 domain family, member 9B (with GRAM domain) isoform a |

| Fragment-ion (m/z)      | 464.28           | 521.36 | 620.45 | 770.55         | 773.88             | 778.10 | 780.23 | 782.27             | 784.02            | 785.97 | 788.86 | 793.18                           | 812.02         | 814.25 | 854.08            | 873.82 | 886.80 | 894.14            | 915.94 | 922.53            | 926.72             | 935.77 | 944.21             | 966.89                          | 972.28            |
|-------------------------|------------------|--------|--------|----------------|--------------------|--------|--------|--------------------|-------------------|--------|--------|----------------------------------|----------------|--------|-------------------|--------|--------|-------------------|--------|-------------------|--------------------|--------|--------------------|---------------------------------|-------------------|
| Frac. Inten. (% of TIC) | 2.57             | 2.89   | 3.56   | 2.82           | 15.36              | 3.12   | 0.09   | 5.30               | 0.28              | 6.32   | 0.56   | 2.94                             | 3.15           | 3.11   | 2.80              | 3.01   | 2.90   | 4.78              | 2.89   | 2.78              | 2.76               | 2.98   | 8.34               | 5.61                            | 9.09              |
| Rel. Inten. (% of BP)   | 16.74            | 18.83  | 23.17  | 18.33          | 100.00             | 20.34  | 0.56   | 34.51              | 1.83              | 41.13  | 3.66   | 19.11                            | 20.49          | 20.24  | 18.25             | 19.61  | 18.90  | 31.10             | 18.79  | 18.07             | 17.99              | 19.41  | 54.29              | 36.52                           | 59.19             |
| Score                   | 1.00             | -0.19  | -0.23  | 1.00           | 1.00               | -0.20  | 1.50   | 1.00               | 2.00              | -0.41  | 2.00   | 0.50                             | 1.00           | -0.20  | 1.00              | -0.19  | -0.19  | 1.00              | -0.19  | 1.00              | 1.00               | -0.19  | 1.00               | 0.50                            | 1.00              |
| Ion-type                | y++ <sub>7</sub> |        |        | b <sub>8</sub> | y+++ <sub>18</sub> |        | sty    | b+++ <sub>13</sub> | y++ <sub>12</sub> |        | m      | y <sub>6</sub> -H <sub>2</sub> O | y <sub>6</sub> |        | b++ <sub>15</sub> |        |        | y++ <sub>14</sub> |        | y++ <sub>15</sub> | b+++ <sub>16</sub> |        | b+++ <sub>23</sub> | y <sub>8</sub> -NH <sub>3</sub> | y++ <sub>16</sub> |
| Delta Da                | 0.55             |        |        | 0.24           | 0.23               |        | -0.12  | 0.42               | -0.30             |        | 0.02   | -0.24                            | 0.59           |        | 0.20              |        |        | 0.79              |        | 0.67              | -0.68              |        | 0.52               | 0.44                            | -0.11             |
|                         |                  |        |        | 1.00           |                    |        |        |                    |                   |        |        |                                  |                |        |                   |        |        |                   |        |                   |                    |        |                    |                                 |                   |
|                         |                  |        |        | st             |                    |        |        |                    | m                 |        |        |                                  |                |        |                   |        |        |                   |        |                   | 0.26               |        |                    |                                 |                   |

# Peak 302

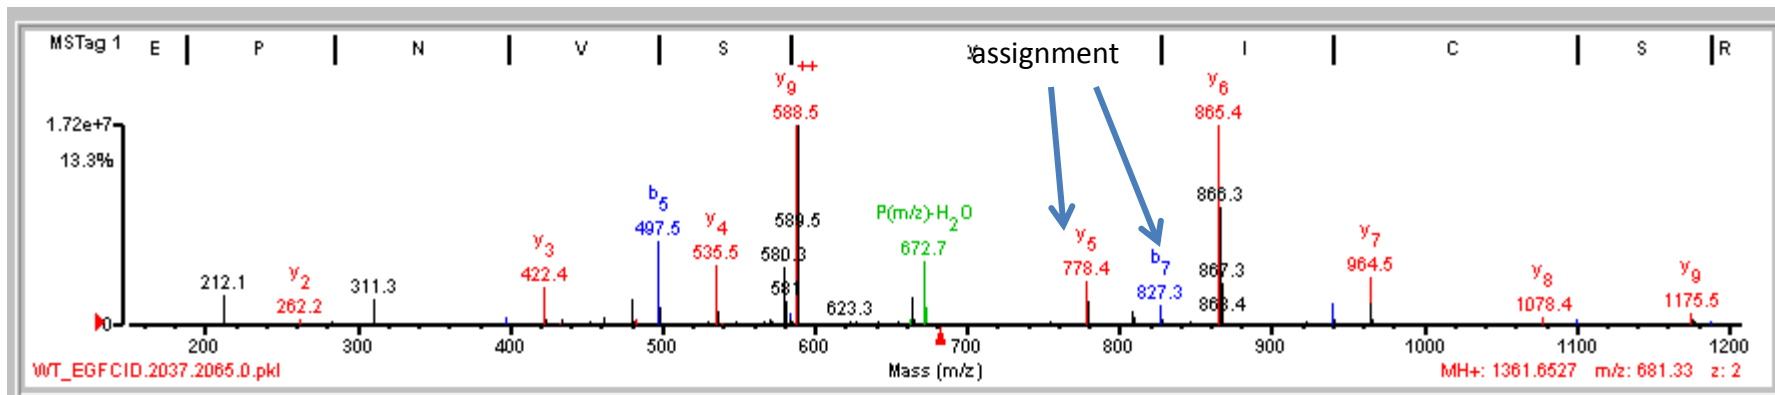

| Rank                    | Score | SPI (%) | BCS | # Unmatched Ions | Variable sites | Sequence                      | MH* Calculated (Da) | MH* Error (Da) | MH* Error (ppm) | Protein MW/pI (Da)              | Species        | Accession #              | MS-Digest Index #                  | Protein Name                     |                  |                |                                  |                |                |                |                |                |                |      |
|-------------------------|-------|---------|-----|------------------|----------------|-------------------------------|---------------------|----------------|-----------------|---------------------------------|----------------|--------------------------|------------------------------------|----------------------------------|------------------|----------------|----------------------------------|----------------|----------------|----------------|----------------|----------------|----------------|------|
| 1                       | 14.49 | 99.1    | 7   | 1/17             | Y279y          | (R) G E/P N/V S Y I C\S R (Y) | 1281.59             | 80.0635        | 71.4            | 50981.1/8.95                    | Homo sapiens   | <a href="#">49574532</a> | <a href="#">5729</a>               | glycogen synthase kinase 3 alpha |                  |                |                                  |                |                |                |                |                |                |      |
| 1                       | 14.49 | 99.1    | 7   | 1/17             | Y216y          | (R) G E/P N/V S Y I C\S R (Y) | 1281.59             | 80.0635        | 71.4            | 48033.9/8.98                    | Homo sapiens   | <a href="#">21361340</a> | <a href="#">32226</a>              | glycogen synthase kinase 3 beta  |                  |                |                                  |                |                |                |                |                |                |      |
| Fragment-ion (m/z)      |       |         |     |                  |                |                               | 212.13              | 311.31         | 422.35          | 480.40                          | 497.46         | 535.47                   | 579.98                             | 584.49                           | 588.51           | 778.37         | 809.35                           | 827.33         | 865.35         | 940.38         | 964.52         | 1100.43        | 1175.52        |      |
| Frac. Inten. (% of TIC) |       |         |     |                  |                |                               | 0.99                | 0.90           | 1.57            | 1.15                            | 3.20           | 2.56                     | 4.48                               | 0.87                             | 63.06            | 2.37           | 0.77                             | 0.94           | 12.46          | 0.99           | 2.46           | 0.45           | 0.78           |      |
| Rel. Inten. (% of BP)   |       |         |     |                  |                |                               | 1.56                | 1.42           | 2.49            | 1.83                            | 5.08           | 4.06                     | 7.11                               | 1.37                             | 100.00           | 3.76           | 1.22                             | 1.50           | 19.76          | 1.57           | 3.90           | 0.71           | 1.24           |      |
| Score                   |       |         |     |                  |                |                               | 1.00                | -0.01          | 1.00            | 0.50                            | 1.00           | 1.00                     | 0.50                               | 1.00                             | 1.00             | 1.00           | 0.50                             | 1.00           | 1.00           | 1.00           | 1.00           | 1.00           | 1.00           | 1.00 |
| Ion-type                |       |         |     |                  |                |                               | y <sup>++3</sup>    |                | y <sub>3</sub>  | b <sub>5</sub> -NH <sub>3</sub> | b <sub>5</sub> | y <sub>4</sub>           | y <sup>++9</sup> -H <sub>2</sub> O | b <sub>6</sub>                   | y <sup>++9</sup> | y <sub>5</sub> | b <sub>7</sub> -H <sub>2</sub> O | b <sub>7</sub> | y <sub>6</sub> | b <sub>8</sub> | y <sub>7</sub> | b <sub>9</sub> | y <sub>9</sub> |      |
| Delta Da                |       |         |     |                  |                |                               | 0.54                |                | 0.17            | 0.19                            | 0.22           | 0.20                     | 0.74                               | 0.22                             | 0.26             | 0.07           | 0.06                             | 0.03           | 0.02           | -0.00          | 0.12           | 0.02           | 0.03           |      |



# Peak 304

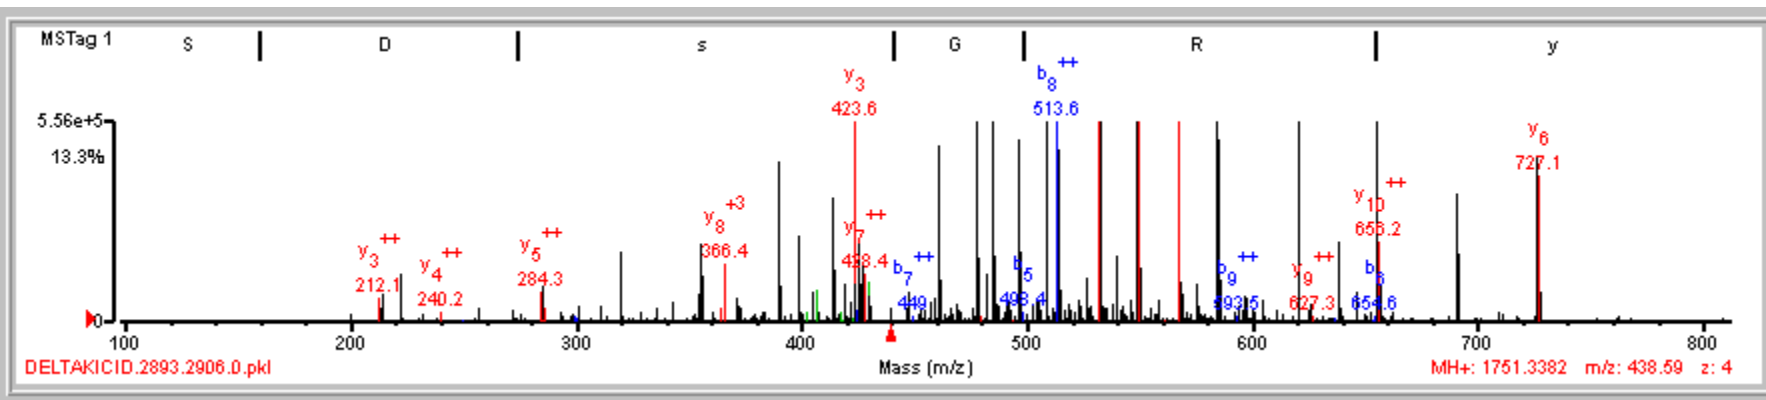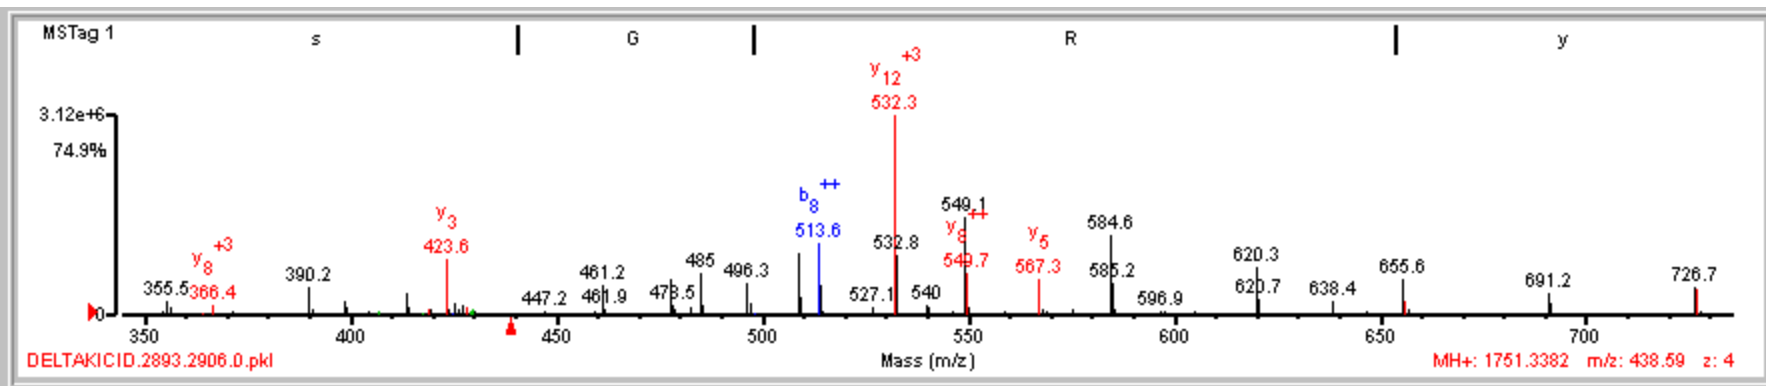

| Rank                    | Score            | SPI (%) | BCS    | # Unmatched Ions | Variable sites    | Sequence                              | MH <sup>+</sup> Calculated (Da)  | MH <sup>+</sup> Error (Da) | MH <sup>+</sup> Error (ppm) | Protein MW/pl (Da) | Species      | Accession #              | MS-Digest Index #     | Protein Name                      |                    |                    |                                    |                  |                |        |        |        |                    |                |        |
|-------------------------|------------------|---------|--------|------------------|-------------------|---------------------------------------|----------------------------------|----------------------------|-----------------------------|--------------------|--------------|--------------------------|-----------------------|-----------------------------------|--------------------|--------------------|------------------------------------|------------------|----------------|--------|--------|--------|--------------------|----------------|--------|
| 1                       | 13.65            | 65.4    | 10     | 10/25            | M172m Y166y S163s | (R) A S/D s/G/R/Y Q I C/S/G/T/m/R (I) | 1575.66                          | 175.6743                   | -144.6                      | 46904.3/9.17       | Homo sapiens | <a href="#">50878302</a> | <a href="#">30496</a> | Fc receptor-like and mucin-like 2 |                    |                    |                                    |                  |                |        |        |        |                    |                |        |
| Fragment-ion (m/z)      | 284.26           | 355.46  | 390.17 | 398.50           | 413.84            | 419.18                                | 423.59                           | 425.34                     | 461.18                      | 478.10             | 484.99       | 496.33                   | 508.75                | 513.58                            | 527.07             | 532.27             | 540.03                             | 549.13           | 567.29         | 584.55 | 620.29 | 638.43 | 655.55             | 691.19         | 726.66 |
| Frac. Inten. (% of TIC) | 1.01             | 1.55    | 0.08   | 1.96             | 0.07              | 1.01                                  | 4.34                             | 2.07                       | 2.54                        | 3.79               | 4.07         | 3.22                     | 5.41                  | 7.24                              | 1.16               | 21.58              | 1.56                               | 10.21            | 3.25           | 7.92   | 4.36   | 1.26   | 4.00               | 2.31           | 4.01   |
| Rel. Inten. (% of BP)   | 4.66             | 7.18    | 0.37   | 9.08             | 0.33              | 4.69                                  | 20.09                            | 9.60                       | 11.78                       | 17.58              | 18.87        | 14.94                    | 25.09                 | 33.56                             | 5.38               | 100.00             | 7.25                               | 47.33            | 15.07          | 36.71  | 20.23  | 5.85   | 18.56              | 10.71          | 18.58  |
| Score                   | 1.00             | -0.07   | 1.00   | -0.09            | 1.50              | 1.00                                  | 1.00                             | 1.00                       | -0.12                       | 1.00               | -0.19        | -0.15                    | -0.25                 | 1.00                              | 1.00               | 1.00               | 0.50                               | 1.00             | 1.00           | -0.37  | -0.20  | -0.06  | 1.00               | -0.11          | 1.00   |
| Ion-type                | y <sup>++5</sup> |         | st     |                  | a <sub>4</sub>    | y <sup>+++9</sup>                     | b <sub>4</sub> -H <sub>2</sub> O | b <sup>+++10</sup>         |                             | b <sup>+++12</sup> |              |                          |                       | b <sup>++8</sup>                  | b <sup>+++13</sup> | y <sup>+++12</sup> | y <sup>++8</sup> -H <sub>2</sub> O | y <sup>++8</sup> | y <sub>5</sub> |        |        |        | y <sup>+++10</sup> | y <sub>6</sub> |        |
| Delta Da                | 0.13             |         | 0.51   |                  | 0.73              | 0.35                                  | 0.50                             | 0.54                       |                             | 0.61               |              |                          |                       | 0.42                              | 0.57               | 0.42               | -0.66                              | -0.56            | 0.03           |        |        |        | -0.70              | -0.63          |        |
|                         |                  |         |        |                  | 1.50              |                                       |                                  |                            |                             |                    |              |                          |                       |                                   |                    |                    | y <sub>5</sub> -H <sub>2</sub> O   |                  |                |        |        |        |                    |                |        |
|                         |                  |         |        |                  | -0.32             |                                       |                                  |                            |                             |                    |              |                          |                       |                                   |                    |                    | -0.11                              |                  |                |        |        |        |                    |                |        |

# Peak 305

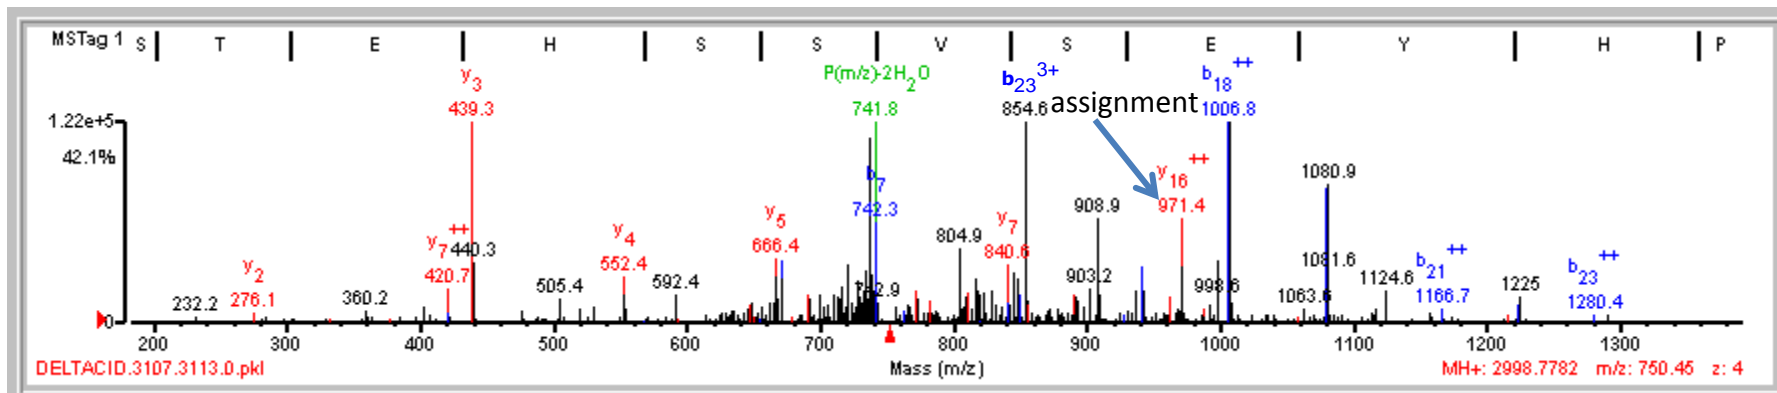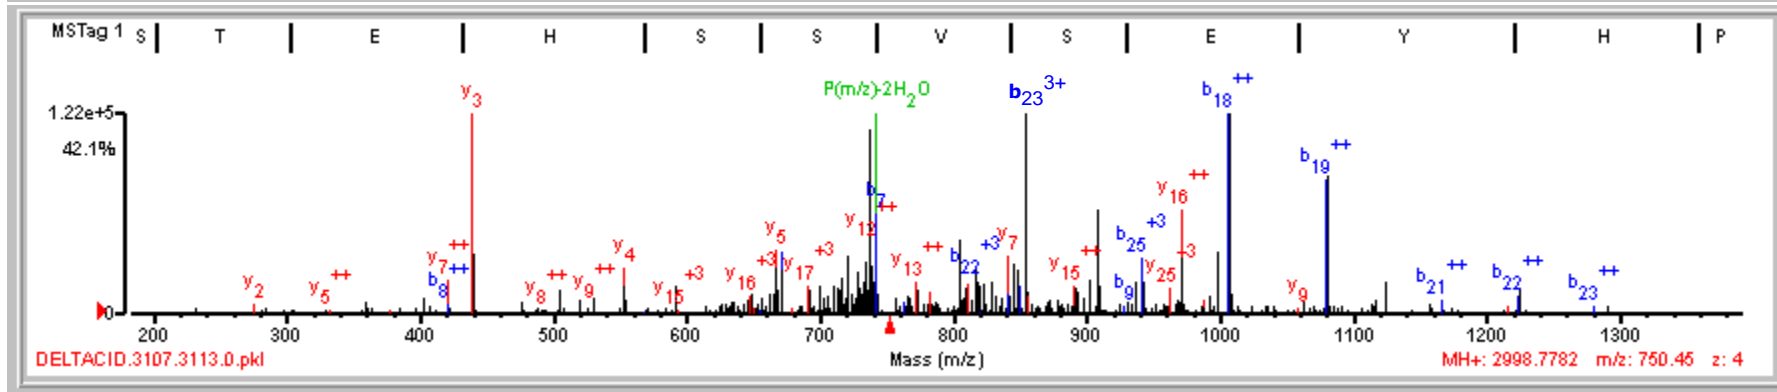

| Rank                    | Score          | SPI (%)        | BCS            | # Unmatched Ions               | Variable sites                 | Sequence                                                            | MH <sup>+</sup> Calculated (Da) | MH <sup>+</sup> Error (Da)    | MH <sup>+</sup> Error (ppm)    | Protein MW/pi (Da)             | Species                        | Accession #                    | MS-Digest Index #              | Protein Name                                         |                                |                                |                                |                                |                                |                                |                                |
|-------------------------|----------------|----------------|----------------|--------------------------------|--------------------------------|---------------------------------------------------------------------|---------------------------------|-------------------------------|--------------------------------|--------------------------------|--------------------------------|--------------------------------|--------------------------------|------------------------------------------------------|--------------------------------|--------------------------------|--------------------------------|--------------------------------|--------------------------------|--------------------------------|--------------------------------|
| 1                       | 15.88          | 89.1           | 11             | 4/21                           | Y491y                          | (R) L S T E H S S V I S E Y H P I A D G Y A F I S S N I I Y T R (G) | 2918.32                         | 80.4554                       | 163.1                          | 91882.07/10                    | Homo sapiens                   | 56682953                       | 20540                          | epidermal growth factor receptor pathway substrate 8 |                                |                                |                                |                                |                                |                                |                                |
| Fragment-ion (m/z)      | 439.33         | 552.44         | 666.37         | 671.38                         | 728.59                         | 734.45                                                              | 737.37                          | 737.87                        | 772.50                         | 804.86                         | 817.11                         | 819.32                         | 840.62                         | 848.56                                               | 854.65                         | 908.94                         | 942.29                         | 971.42                         | 997.93                         | 1006.76                        | 1080.19                        |
| Frac. Inten. (% of TIC) | 7.24           | 2.50           | 3.86           | 2.68                           | 1.74                           | 2.69                                                                | 1.83                            | 6.87                          | 1.84                           | 4.14                           | 2.10                           | 2.11                           | 3.31                           | 1.92                                                 | 17.47                          | 3.57                           | 2.34                           | 4.33                           | 2.24                           | 16.79                          | 8.44                           |
| Rel. Inten. (% of BP)   | 41.45          | 14.31          | 22.09          | 15.33                          | 9.94                           | 15.37                                                               | 10.47                           | 39.33                         | 10.55                          | 23.70                          | 12.03                          | 12.07                          | 18.96                          | 11.02                                                | 100.00                         | 20.45                          | 13.42                          | 24.77                          | 12.85                          | 96.10                          | 48.30                          |
| Score                   | 1.00           | 1.00           | 1.00           | 1.00                           | 1.00                           | -0.15                                                               | 1.00                            | 1.00                          | 1.00                           | -0.24                          | 1.00                           | -0.12                          | 1.00                           | -0.11                                                | 1.00                           | 1.00                           | 1.00                           | 1.00                           | 0.50                           | 1.00                           | 1.00                           |
| Ion-type                | y <sub>3</sub> | y <sub>4</sub> | y <sub>5</sub> | b <sup>+++</sup> <sub>18</sub> | b <sup>+++</sup> <sub>13</sub> | y <sup>++</sup> <sub>12</sub>                                       | y <sup>++</sup> <sub>12</sub>   | y <sup>++</sup> <sub>13</sub> | b <sup>+++</sup> <sub>22</sub> | b <sup>+++</sup> <sub>23</sub> | b <sup>+++</sup> <sub>24</sub> | b <sup>+++</sup> <sub>25</sub> | b <sup>+++</sup> <sub>17</sub> | b <sup>+++</sup> <sub>18</sub>                       | b <sup>+++</sup> <sub>18</sub> | b <sup>+++</sup> <sub>18</sub> | b <sup>+++</sup> <sub>18</sub> | b <sup>+++</sup> <sub>18</sub> | b <sup>+++</sup> <sub>18</sub> | b <sup>+++</sup> <sub>18</sub> | b <sup>+++</sup> <sub>18</sub> |
| Delta Da                | 0.10           | 0.13           | 0.01           | 0.11                           | 0.76                           | 0.06                                                                | 0.56                            | -0.32                         | 0.78                           | -0.79                          | 0.62                           | 0.56                           | 0.23                           | 0.53                                                 | 0.53                           | 0.53                           | 0.53                           | 0.53                           | 0.35                           | 0.25                           | 0.74                           |

# Peak 306

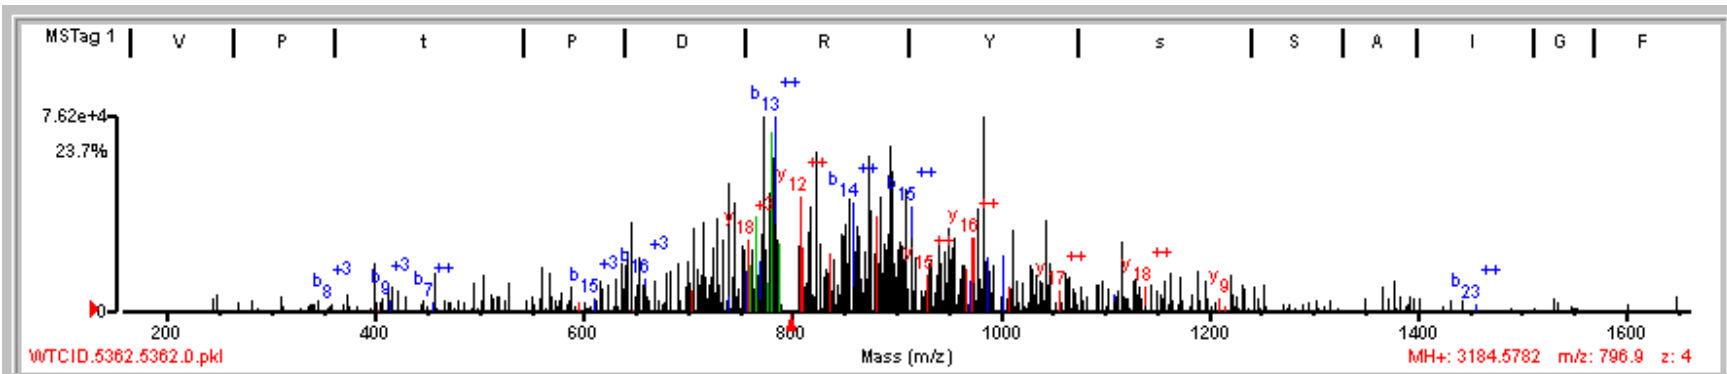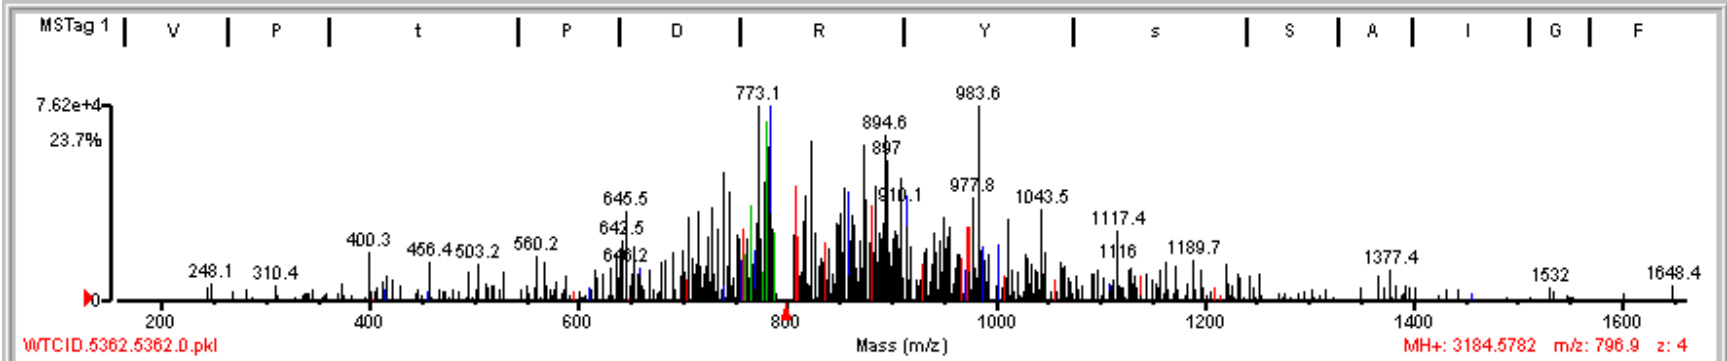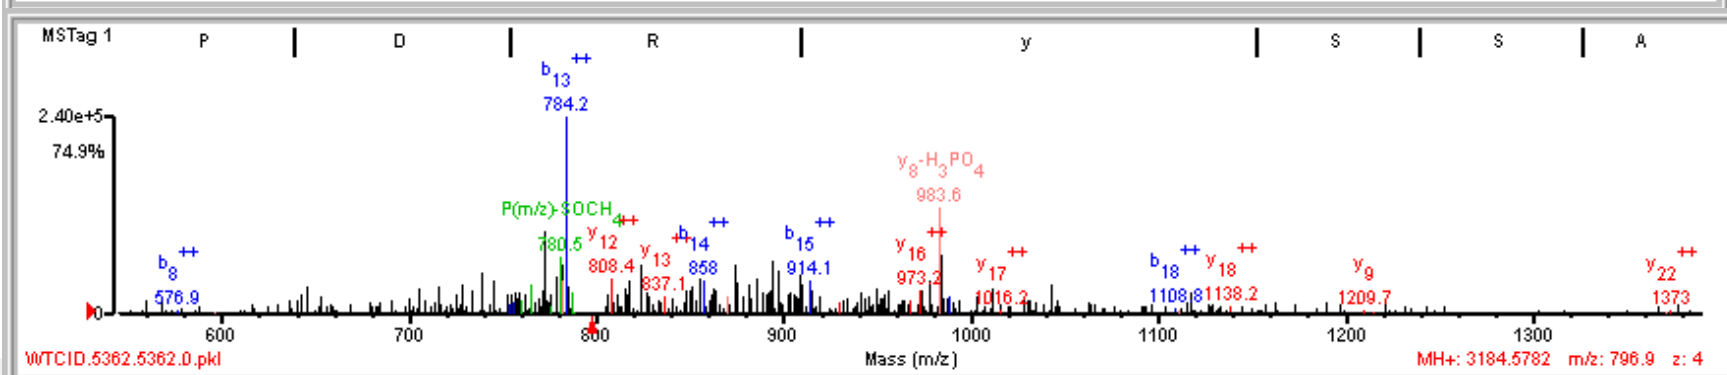

| Rank | Score | SPI (%) | BCS | # Unmatched Ions | Variable sites          | Sequence                                                           | MH <sup>+</sup> Calculated (Da) | MH <sup>+</sup> Error (Da) | MH <sup>+</sup> Error (ppm) | Protein MW/pi (Da) | Species      | Accession #             | MS-Digest Index #     | Protein Name            |
|------|-------|---------|-----|------------------|-------------------------|--------------------------------------------------------------------|---------------------------------|----------------------------|-----------------------------|--------------------|--------------|-------------------------|-----------------------|-------------------------|
| 1    | 13.15 | 74.3    | 8   | 7/23             | M903m T910t Y888y Y895y | (K)Y V P T P D R Y S / S A / I G I F \ L m K N S W Q \ I t P R (N) | 2927.49                         | 257.0909                   | 375.9                       | 154374.5/8.41      | Homo sapiens | <a href="#">7019555</a> | <a href="#">24268</a> | transmembrane protein 2 |

| Fragment-ion (m/z)      | 738.64 | 773.08 | 780.54 | 784.18                         | 808.43                         | 816.51 | 823.69 | 849.87                         | 858.05                         | 862.31 | 873.94                         | 881.77         | 885.51                                           | 892.31                          | 894.64                         | 897.05 | 902.73 | 905.57                                           | 908.66         | 914.10                         | 973.24                         | 977.80 | 983.55                                         |
|-------------------------|--------|--------|--------|--------------------------------|--------------------------------|--------|--------|--------------------------------|--------------------------------|--------|--------------------------------|----------------|--------------------------------------------------|---------------------------------|--------------------------------|--------|--------|--------------------------------------------------|----------------|--------------------------------|--------------------------------|--------|------------------------------------------------|
| Frac. Inten. (% of TIC) | 4.06   | 0.21   | 0.26   | 19.01                          | 4.35                           | 3.25   | 3.54   | 3.49                           | 2.64                           | 3.48   | 5.76                           | 2.85           | 3.04                                             | 2.86                            | 3.62                           | 5.17   | 3.13   | 3.45                                             | 4.22           | 2.74                           | 3.93                           | 3.10   | 11.85                                          |
| Rel. Inten. (% of BP)   | 21.36  | 1.11   | 1.35   | 100.00                         | 22.88                          | 17.11  | 18.60  | 18.38                          | 13.91                          | 18.31  | 30.28                          | 15.01          | 15.97                                            | 15.03                           | 19.07                          | 27.19  | 16.44  | 18.15                                            | 22.22          | 14.40                          | 20.67                          | 16.29  | 62.31                                          |
| Score                   | -0.21  | 1.50   | 2.00   | 1.00                           | 1.00                           | -0.17  | -0.19  | 1.00                           | 1.00                           | -0.18  | 1.00                           | 0.25           | 0.50                                             | 0.50                            | 1.00                           | -0.27  | -0.16  | 0.50                                             | 1.00           | 1.00                           | 1.00                           | -0.16  | 0.25                                           |
| Ion-type                |        | sty    | m      | b <sup>+++</sup> <sub>13</sub> | y <sup>+++</sup> <sub>12</sub> |        |        | y <sup>+++</sup> <sub>20</sub> | b <sup>+++</sup> <sub>14</sub> |        | b <sup>+++</sup> <sub>21</sub> | a <sub>7</sub> | y <sup>+++</sup> <sub>14</sub> -H <sub>2</sub> O | b <sub>7</sub> -NH <sub>3</sub> | y <sup>+++</sup> <sub>14</sub> |        |        | b <sup>+++</sup> <sub>16</sub> -H <sub>2</sub> O | b <sub>7</sub> | b <sup>+++</sup> <sub>15</sub> | y <sup>+++</sup> <sub>16</sub> |        | y <sub>8</sub> -H <sub>3</sub> PO <sub>4</sub> |
| Delta Da                |        | 0.97   | -0.06  | -0.14                          | -0.46                          |        |        | 0.49                           | 0.20                           |        | 0.56                           | 0.38           | 0.58                                             | -0.05                           | 0.70                           |        |        | 0.18                                             | -0.73          | -0.29                          | 0.27                           |        | 0.04                                           |

# Peak 307

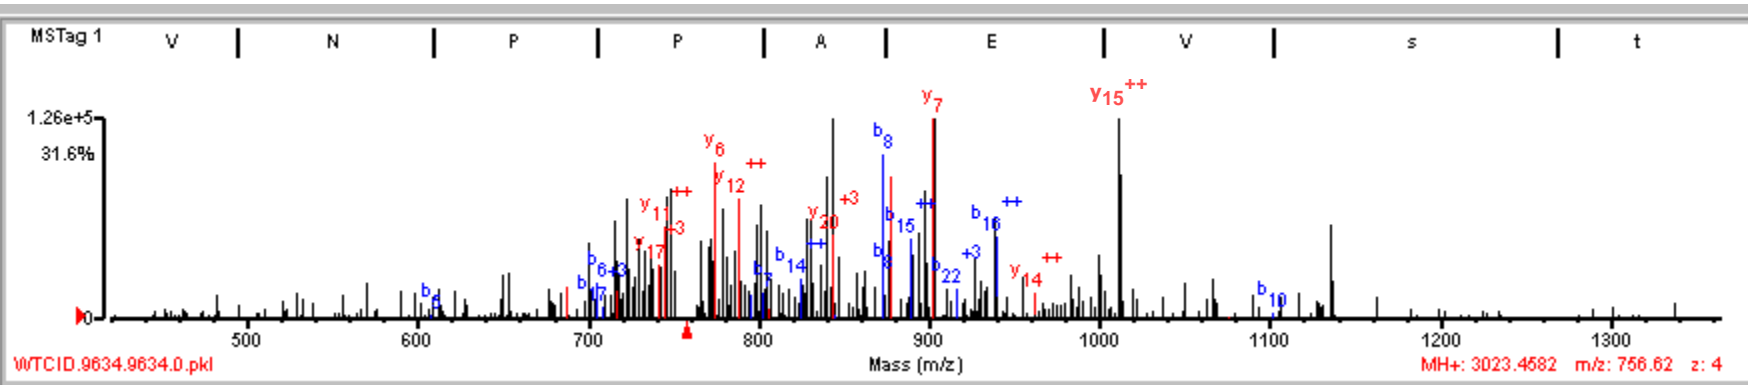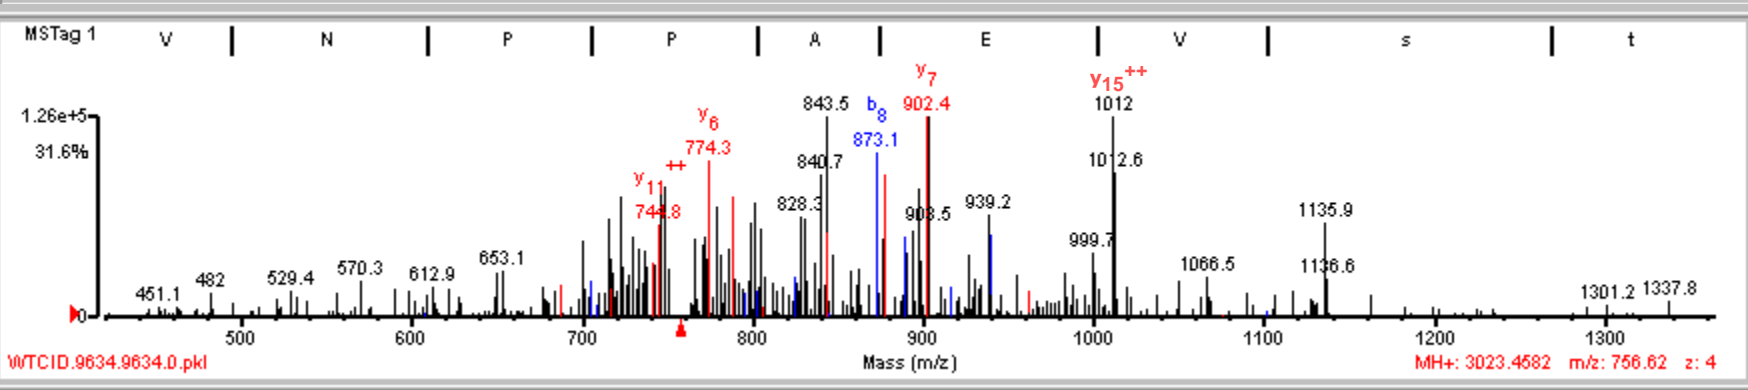

| Rank | Score | SPI (%) | BCS | # Unmatched Ions | Variable sites    | Sequence                                                                | MH <sup>+</sup> Calculated (Da) | MH <sup>+</sup> Error (Da) | MH <sup>+</sup> Error (ppm) | Protein MW/pi (Da) | Species      | Accession #              | MS-Digest Index #     | Protein Name                                                                                       |
|------|-------|---------|-----|------------------|-------------------|-------------------------------------------------------------------------|---------------------------------|----------------------------|-----------------------------|--------------------|--------------|--------------------------|-----------------------|----------------------------------------------------------------------------------------------------|
| 1    | 11.34 | 65.8    | 11  | 9/23             | T405t Y410y S404s | (R) K E R V N P P I A E V s t / S / L / K / T / y / Q / R F T L E K (A) | 2783.44                         | 240.0219                   | 40.7                        | 63498.8/7.72       | Homo sapiens | <a href="#">7710152</a>  | <a href="#">2868</a>  | mannosyl (alpha-1,3-)-glycoprotein beta-1,4-N-acetylglucosaminyltransferase, isoenzyme B isoform 1 |
| 1    | 11.34 | 65.8    | 11  | 9/23             | T420t Y425y S419s | (R) K E R V N P P I A E V s t / S / L / K / T / y / Q / R F T L E K (A) | 2783.44                         | 240.0219                   | 40.7                        | 64845.5/8.38       | Homo sapiens | <a href="#">16915936</a> | <a href="#">12639</a> | mannosyl (alpha-1,3-)-glycoprotein beta-1,4-N-acetylglucosaminyltransferase, isoenzyme B isoform 2 |

| Fragment-ion (m/z)      | 715.35 | 722.30 | 741.53             | 744.79             | 770.45 | 774.32         | 779.66                               | 785.64                          | 788.16             | 799.05 | 801.73         | 825.16             | 840.67 | 843.54         | 873.08             | 877.48             | 889.65 | 893.78 | 898.04 | 902.40         | 939.25             | 1012.04            | 1135.89 |
|-------------------------|--------|--------|--------------------|--------------------|--------|----------------|--------------------------------------|---------------------------------|--------------------|--------|----------------|--------------------|--------|----------------|--------------------|--------------------|--------|--------|--------|----------------|--------------------|--------------------|---------|
| Frac. Inten. (% of TIC) | 3.81   | 3.81   | 3.05               | 4.15               | 4.12   | 3.12           | 2.14                                 | 2.41                            | 2.33               | 2.45   | 2.73           | 2.42               | 3.42   | 6.29           | 4.55               | 3.37               | 2.97   | 3.39   | 4.17   | 20.63          | 4.04               | 7.91               | 2.74    |
| Rel. Inten. (% of BP)   | 18.45  | 18.44  | 14.77              | 20.11              | 19.97  | 15.11          | 10.38                                | 11.88                           | 11.30              | 11.86  | 13.22          | 11.75              | 16.58  | 30.47          | 22.04              | 16.35              | 14.37  | 16.44  | 20.19  | 100.00         | 19.59              | 38.31              | 13.28   |
| Score                   | -0.18  | -0.18  | 1.00               | 1.00               | -0.20  | 1.00           | 0.50                                 | 0.50                            | 1.00               | -0.12  | 1.00           | 1.00               | -0.17  | -0.30          | 1.00               | 1.00               | 1.00   | -0.18  | -0.20  | 1.00           | 1.00               | 1.00               | -0.13   |
| Ion-type                |        |        | y+++ <sub>17</sub> | y+++ <sub>11</sub> |        | a <sub>7</sub> | y+++ <sub>12</sub> -H <sub>2</sub> O | b <sub>7</sub> -NH <sub>3</sub> | y+++ <sub>12</sub> |        | b <sub>7</sub> | b+++ <sub>14</sub> |        | b <sub>8</sub> | y+++ <sub>21</sub> | b+++ <sub>15</sub> |        |        |        | y <sub>7</sub> | b+++ <sub>18</sub> | y+++ <sub>15</sub> |         |
| Delta Da                |        |        | 0.22               | 0.42               |        | -0.11          | 0.78                                 | 0.25                            | 0.28               |        | -0.69          | -0.19              |        | -0.38          | 0.43               | 0.25               |        |        | -0.07  | -0.67          | 0.62               |                    |         |







# Peak 310

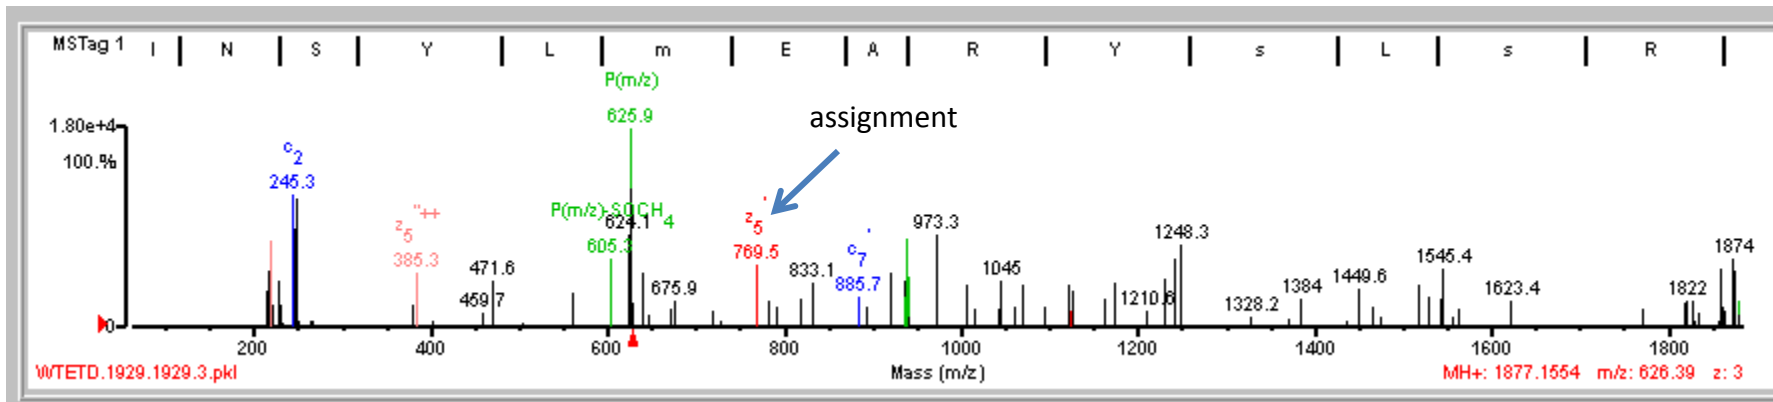

| Rank | Score | SPI (%) | BCS | # Unmatched Ions | Variable sites       | Sequence                                | MH <sup>+</sup> Calculated (Da) | MH <sup>+</sup> Error (Da) | MH <sup>+</sup> Error (ppm) | Protein MW/pI (Da) | Species      | Accession #               | MS-Digest Index #     | Protein Name                                             |
|------|-------|---------|-----|------------------|----------------------|-----------------------------------------|---------------------------------|----------------------------|-----------------------------|--------------------|--------------|---------------------------|-----------------------|----------------------------------------------------------|
| 1    | 6.41  | 62.4    | 5   | 5/13             | M7147m Y7151y S7154s | (K) I N S Y L m E A R / y S / L s R (F) | 1702.86                         | 174.2973                   | -868.5                      | 1011033.2/5.38     | Homo sapiens | <a href="#">154277116</a> | <a href="#">11967</a> | spectrin repeat containing, nuclear envelope 1 isoform 1 |

| Fragment-ion (m/z)      | 217.71 | 220.45                       | 228.10                       | 245.28         | 248.68                       | 385.30                       | 605.26 | 769.51         | 884.76         | 973.28 | 1241.79 | 1248.29 | 1545.35 |
|-------------------------|--------|------------------------------|------------------------------|----------------|------------------------------|------------------------------|--------|----------------|----------------|--------|---------|---------|---------|
| Frac. Inten. (% of TIC) | 5.09   | 9.63                         | 5.15                         | 20.43          | 11.48                        | 4.92                         | 0.18   | 5.64           | 4.98           | 8.28   | 6.07    | 12.88   | 5.28    |
| Rel. Inten. (% of BP)   | 24.93  | 47.14                        | 25.20                        | 100.00         | 56.18                        | 24.10                        | 0.89   | 27.59          | 24.35          | 40.51  | 29.73   | 63.06   | 25.83   |
| Score                   | -0.25  | 1.00                         | 0.25                         | 1.00           | 1.00                         | 1.00                         | 2.00   | 1.00           | 1.00           | -0.41  | -0.30   | -0.63   | -0.26   |
| Ion-type                |        | z <sup>++</sup> <sub>3</sub> | y <sup>++</sup> <sub>3</sub> | c <sub>2</sub> | c <sup>++</sup> <sub>4</sub> | z <sup>++</sup> <sub>5</sub> | m      | z <sub>5</sub> | c <sub>7</sub> |        |         |         |         |
| Delta Da                |        | 0.36                         | -0.00                        | 0.12           | 0.55                         | 0.17                         | -0.34  | 0.27           | 0.34           |        |         |         |         |



# Peak 312

Ions that verify assignment

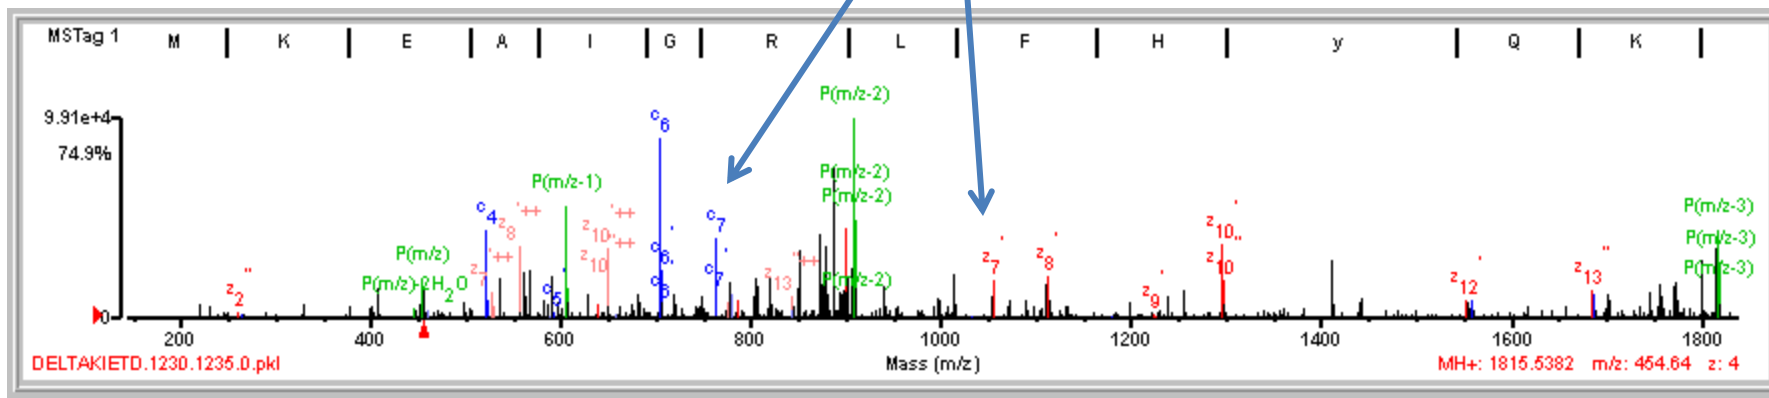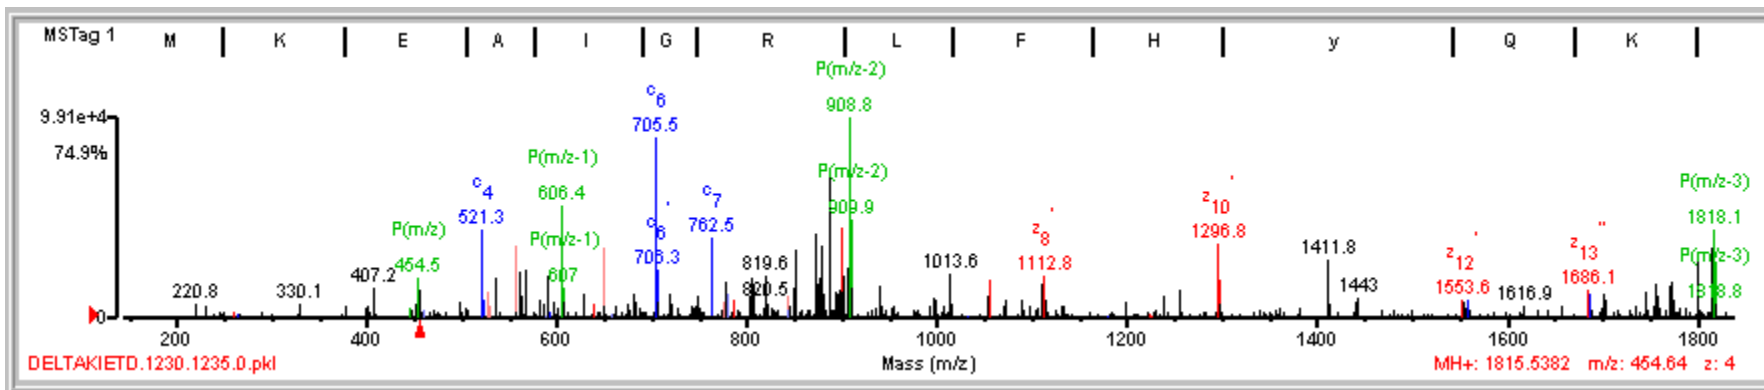

| Rank                    | Score          | SPI (%)          | BCS              | # Unmatched Ions  | # Variable sites  | Sequence                            | MH <sup>+</sup> Calculated (Da) | MH <sup>+</sup> Error (Da) | MH <sup>+</sup> Error (ppm) | Protein MW/pI (Da) | Species      | Accession # | MS-Digest Index # | Protein Name                                        |        |        |        |        |         |                  |                  |                   |                   |                 |         |
|-------------------------|----------------|------------------|------------------|-------------------|-------------------|-------------------------------------|---------------------------------|----------------------------|-----------------------------|--------------------|--------------|-------------|-------------------|-----------------------------------------------------|--------|--------|--------|--------|---------|------------------|------------------|-------------------|-------------------|-----------------|---------|
| 1                       | 8.27           | 61.2             | 5                | 11/25             | Y334y             | (K) D/M/K/E/A I/G R/L/F/H/y/Q/K (R) | 1735.89                         | 79.6433                    | -177.9                      | 38362.1/8.39       | Homo sapiens | 52353342    | 21295             | olfactory receptor, family 6, subfamily K, member 6 |        |        |        |        |         |                  |                  |                   |                   |                 |         |
| Fragment-ion (m/z)      | 521.34         | 535.86           | 556.52           | 562.40            | 648.76            | 681.71                              | 705.51                          | 748.63                     | 762.52                      | 779.15             | 804.56       | 819.56      | 843.38            | 850.84                                              | 873.28 | 886.64 | 940.46 | 997.75 | 1013.65 | 1055.71          | 1112.82          | 1296.75           | 1411.83           | 1553.62         | 1701.18 |
| Frac. Inten. (% of TIC) | 5.29           | 2.27             | 3.84             | 2.79              | 5.43              | 2.26                                | 11.15                           | 2.85                       | 4.92                        | 3.39               | 2.36         | 2.57        | 2.47              | 6.04                                                | 5.32   | 6.47   | 2.72   | 2.60   | 4.70    | 3.54             | 3.09             | 5.93              | 3.57              | 2.17            | 2.25    |
| Rel. Inten. (% of BP)   | 47.46          | 20.40            | 34.42            | 25.01             | 48.73             | 20.22                               | 100.00                          | 25.52                      | 44.15                       | 30.38              | 21.20        | 23.07       | 22.19             | 54.17                                               | 47.75  | 57.98  | 24.42  | 23.30  | 42.15   | 31.73            | 27.75            | 53.16             | 31.97             | 19.44           | 20.18   |
| Score                   | 1.00           | 0.25             | 1.00             | 1.00              | 1.00              | -0.20                               | 1.00                            | -0.26                      | 1.00                        | -0.30              | -0.21        | -0.23       | 1.00              | 0.25                                                | -0.48  | -0.58  | -0.24  | -0.23  | -0.42   | 1.00             | 1.00             | 1.00              | -0.32             | 1.00            | 0.25    |
| Ion-type                | c <sub>4</sub> | y <sup>++7</sup> | z <sup>++8</sup> | z <sup>3+13</sup> | z <sup>++10</sup> |                                     | c <sub>6</sub>                  |                            | c <sub>7</sub>              |                    |              |             | z <sup>++13</sup> | y <sup>++13</sup>                                   |        |        |        |        |         | z <sub>7</sub> ' | z <sub>8</sub> ' | z <sub>10</sub> ' | z <sub>12</sub> ' | y <sub>13</sub> |         |
| Delta Da                | 0.10           | -0.40            | -0.24            | 0.12              | -0.06             |                                     | 0.15                            |                            | 0.14                        |                    |              |             | 0.47              | -0.08                                               |        |        |        |        |         | 0.22             | 0.30             | 0.11              | -0.16             | 0.35            |         |



# Peak 315

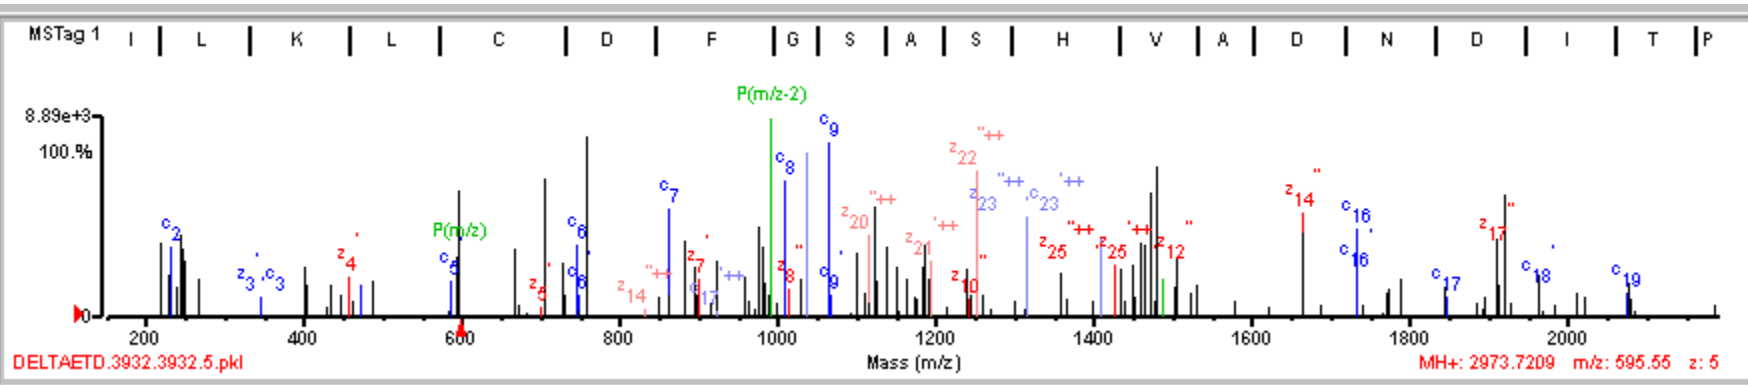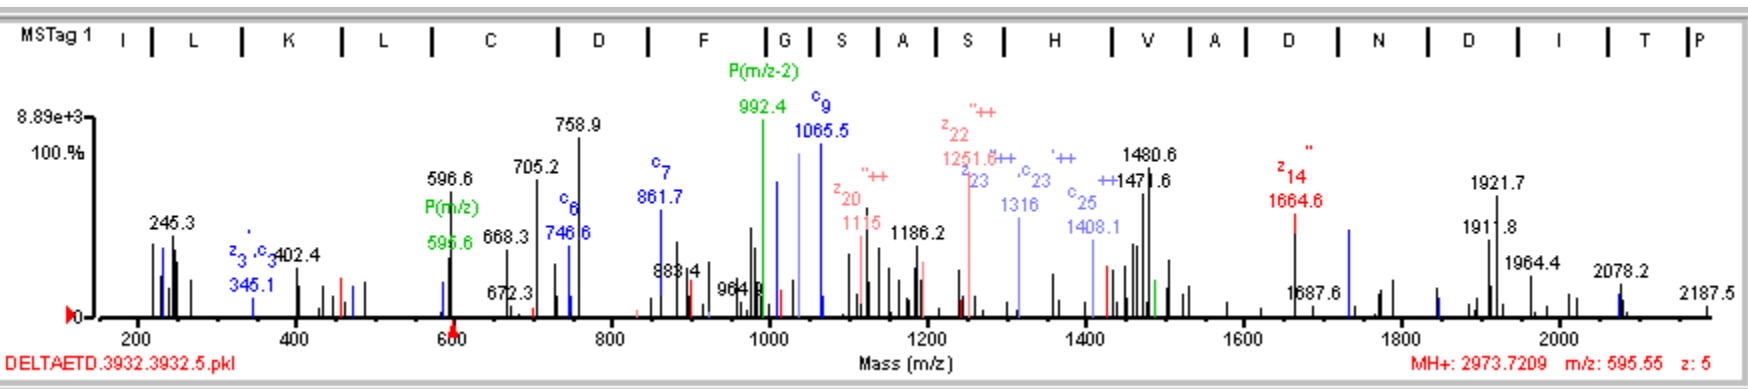

| Rank                    | Score          | SPI (%)        | BCS                            | # Unmatched Ions               | # Variable sites | Sequence                                                                      | MH* Calculated (Da) | MH* Error (Da) | MH* Error (ppm)                | Protein MW/pl (Da)             | Species                        | Accession #                    | MS-Digest Index #              | Protein Name                          |                 |         |         |
|-------------------------|----------------|----------------|--------------------------------|--------------------------------|------------------|-------------------------------------------------------------------------------|---------------------|----------------|--------------------------------|--------------------------------|--------------------------------|--------------------------------|--------------------------------|---------------------------------------|-----------------|---------|---------|
| 1                       | 9.32           | 89.9           | 13                             | 2/17                           | Y849y            | (K) T I L / K / L C / D I F / G / S A S / H V A D N D I T P V Y L V / S R (F) | 2892.46             | 81.2649        | 436.7                          | 116987.4/10.26                 | Homo sapiens                   | <a href="#">89276756</a>       | <a href="#">18658</a>          | serine/threonine-protein kinase PRP4K |                 |         |         |
| Fragment-ion (m/z)      | 231.85         | 246.84         | 705.17                         | 758.91                         | 861.67           | 882.51                                                                        | 1008.82             | 1038.45        | 1065.50                        | 1115.02                        | 1122.84                        | 1251.65                        | 1316.00                        | 1664.65                               | 1733.18         | 1911.85 | 1921.67 |
| Frac. Inten. (% of TIC) | 5.57           | 5.89           | 5.96                           | 7.81                           | 4.70             | 4.79                                                                          | 5.90                | 7.07           | 8.53                           | 4.24                           | 4.79                           | 6.29                           | 4.32                           | 8.24                                  | 5.81            | 4.76    | 5.33    |
| Rel. Inten. (% of BP)   | 65.22          | 69.05          | 69.80                          | 91.56                          | 55.03            | 56.14                                                                         | 69.18               | 82.81          | 100.00                         | 49.72                          | 56.12                          | 73.71                          | 50.58                          | 96.53                                 | 68.06           | 55.84   | 62.44   |
| Score                   | 1.00           | 0.25           | 1.00                           | 0.25                           | 1.00             | 0.25                                                                          | 1.00                | 1.00           | 1.00                           | 0.25                           | 1.00                           | 0.25                           | 0.25                           | 1.00                                  | -0.56           | -0.62   |         |
| Ion-type                | c <sub>2</sub> | z <sub>2</sub> | z <sub>3</sub> + <sub>19</sub> | c <sub>3</sub> + <sub>21</sub> | c <sub>7</sub>   | y <sub>4</sub> + <sub>23</sub>                                                | c <sub>8</sub>      | c <sub>9</sub> | c <sub>9</sub>                 | y <sub>4</sub> + <sub>20</sub> | z <sub>1</sub> + <sub>20</sub> | z <sub>1</sub> + <sub>22</sub> | c <sub>1</sub> + <sub>23</sub> | z <sub>1</sub> + <sub>14</sub>        | c <sub>16</sub> |         |         |
| Delta Da                | -0.32          | -0.30          | 0.18                           | 0.19                           | 0.18             | 0.10                                                                          | 0.27                | 0.44           | -0.08                          | 0.53                           | 0.34                           | 0.60                           | 0.37                           | -0.12                                 | 0.31            |         |         |
|                         |                |                |                                |                                |                  |                                                                               |                     |                | y <sub>4</sub> + <sub>19</sub> |                                |                                |                                | z <sub>1</sub> + <sub>23</sub> |                                       |                 |         |         |





# Peak 318

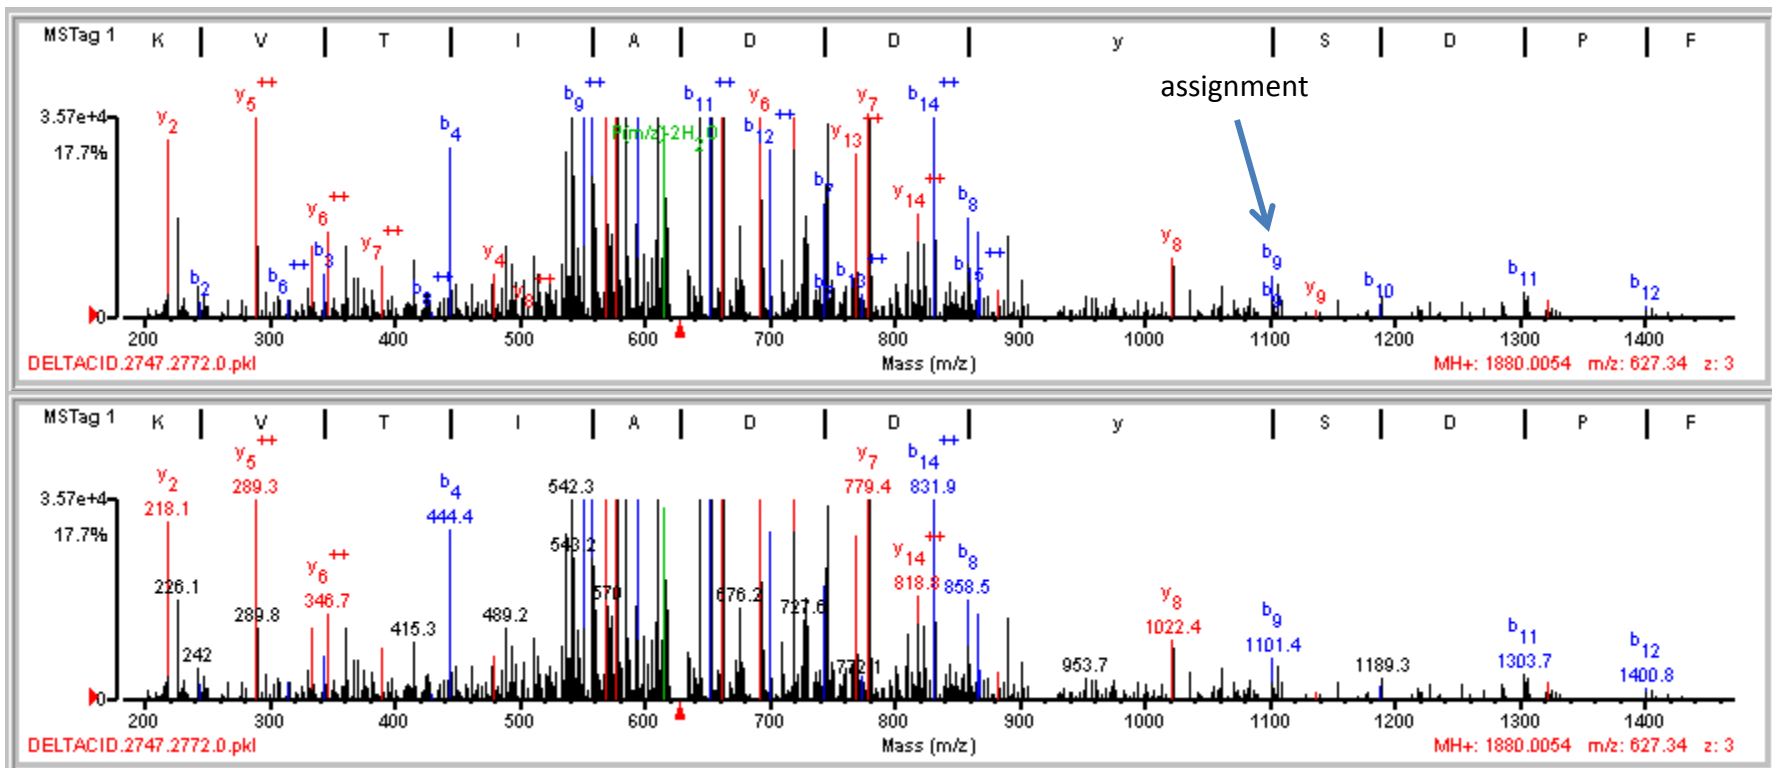

| Rank                    | Score          | SPI (%)                      | BCS            | # Unmatched Ions                               | Variable sites               | Sequence                                    | MH <sup>+</sup> Calculated (Da)                | MH <sup>+</sup> Error (Da)   | MH <sup>+</sup> Error (ppm) | Protein MW/pl (Da)                              | Species                       | Accession #                     | MS-Digest Index #                               | Protein Name                                       |                               |                |                               |                |                               |                |                               |                                                 |                               |                |        |
|-------------------------|----------------|------------------------------|----------------|------------------------------------------------|------------------------------|---------------------------------------------|------------------------------------------------|------------------------------|-----------------------------|-------------------------------------------------|-------------------------------|---------------------------------|-------------------------------------------------|----------------------------------------------------|-------------------------------|----------------|-------------------------------|----------------|-------------------------------|----------------|-------------------------------|-------------------------------------------------|-------------------------------|----------------|--------|
| 1                       | 22.37          | 98.1                         | 10             | 1/25                                           | Y246y                        | (K) D K V / T I A D D y S D I P F D A K (N) | 1799.83                                        | 80.1720                      | 109.4                       | 55042.5/9.10                                    | Homo sapiens                  | <a href="#">106879210</a>       | <a href="#">23534</a>                           | Src homology 2 domain containing adaptor protein B |                               |                |                               |                |                               |                |                               |                                                 |                               |                |        |
| Fragment-ion (m/z)      | 218.11         | 289.26                       | 444.41         | 542.27                                         | 551.31                       | 557.39                                      | 560.05                                         | 569.63                       | 577.31                      | 585.74                                          | 594.69                        | 611.32                          | 643.50                                          | 652.32                                             | 662.30                        | 692.44         | 719.08                        | 743.52         | 747.17                        | 769.25         | 779.40                        | 819.03                                          | 823.15                        | 831.94         | 858.50 |
| Frac. Inten. (% of TIC) | 1.59           | 2.51                         | 1.75           | 4.10                                           | 4.50                         | 5.81                                        | 2.05                                           | 3.06                         | 15.00                       | 2.60                                            | 0.09                          | 1.76                            | 4.11                                            | 11.45                                              | 8.43                          | 5.41           | 4.29                          | 2.09           | 1.90                          | 2.05           | 7.30                          | 1.64                                            | 1.62                          | 2.92           | 1.96   |
| Rel. Inten. (% of BP)   | 10.58          | 16.71                        | 11.69          | 27.34                                          | 30.01                        | 38.72                                       | 20.37                                          | 100.00                       | 17.30                       | 0.59                                            | 11.71                         | 27.42                           | 76.32                                           | 56.18                                              | 36.06                         | 28.59          | 13.93                         | 12.69          | 13.64                         | 48.67          | 10.94                         | 10.78                                           | 19.49                         | 13.04          |        |
| Score                   | 1.00           | 1.00                         | 1.00           | 0.50                                           | 1.00                         | 1.00                                        | 1.00                                           | 1.00                         | 1.00                        | 0.50                                            | 1.50                          | 0.50                            | 0.50                                            | 1.00                                               | 1.00                          | 1.00           | 1.00                          | 1.00           | -0.13                         | 1.00           | 1.00                          | 1.00                                            | 0.50                          | 1.00           | 1.00   |
| Ion-type                | y <sub>2</sub> | y <sub>5</sub> <sup>++</sup> | b <sub>4</sub> | b <sub>3</sub> <sup>++</sup> -H <sub>2</sub> O | b <sub>4</sub> <sup>++</sup> | b <sub>5</sub>                              | y <sub>6</sub> <sup>++</sup> -H <sub>2</sub> O | y <sub>6</sub> <sup>++</sup> | y <sub>5</sub>              | b <sub>10</sub> <sup>++</sup> -H <sub>2</sub> O | b <sub>10</sub> <sup>++</sup> | b <sub>6</sub> -NH <sub>3</sub> | b <sub>11</sub> <sup>++</sup> -H <sub>2</sub> O | b <sub>11</sub> <sup>++</sup>                      | y <sub>11</sub> <sup>++</sup> | y <sub>6</sub> | y <sub>12</sub> <sup>++</sup> | b <sub>7</sub> | y <sub>13</sub> <sup>++</sup> | y <sub>7</sub> | y <sub>14</sub> <sup>++</sup> | b <sub>14</sub> <sup>++</sup> -H <sub>2</sub> O | b <sub>14</sub> <sup>++</sup> | b <sub>8</sub> |        |
| Delta Da                | -0.04          | 0.11                         | 0.16           | 0.05                                           | 0.08                         | 0.06                                        | -0.16                                          | 0.42                         | 0.01                        | 0.00                                            | -0.05                         | -0.02                           | 0.25                                            | 0.06                                               | 0.06                          | 0.12           | 0.30                          | 0.13           | -0.06                         | 0.04           | 0.19                          | 0.32                                            | 0.11                          | 0.08           |        |



# Peak 320

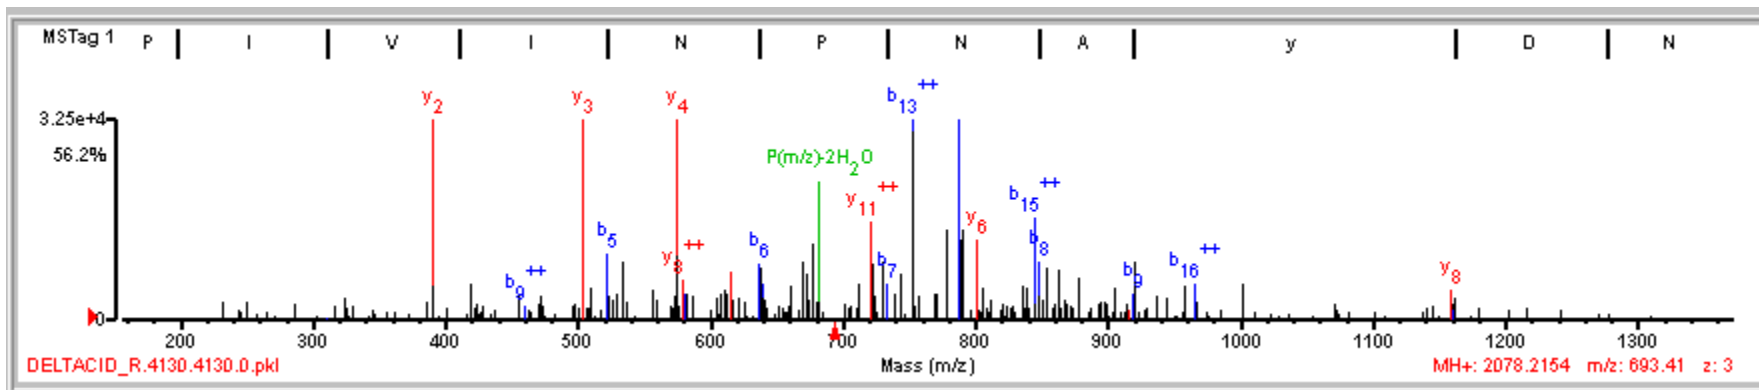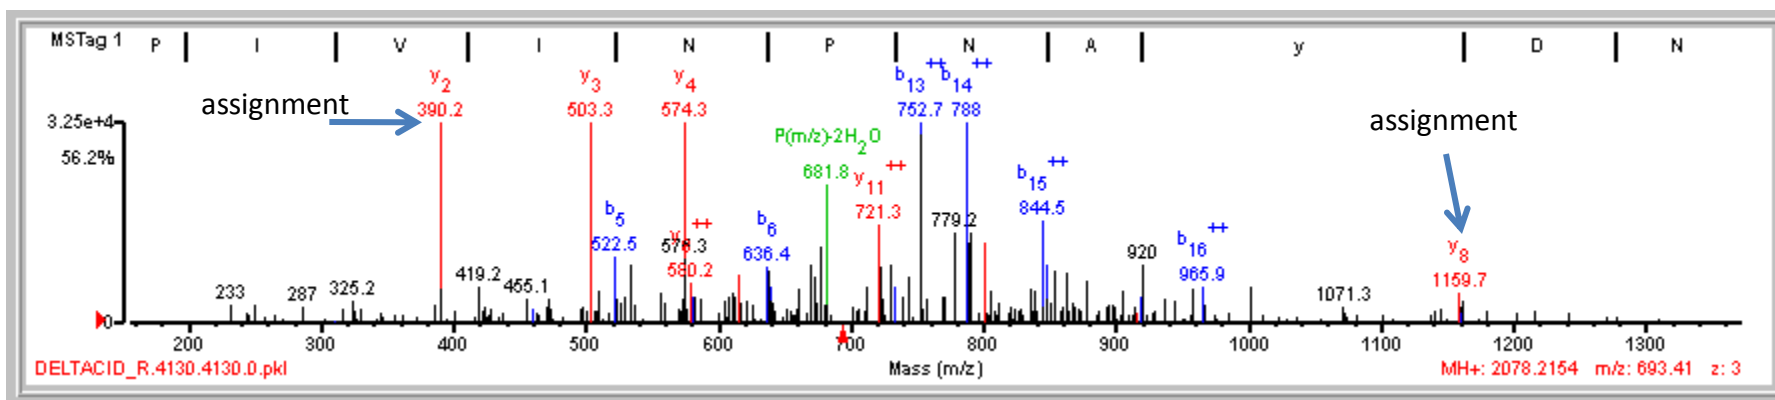

| Rank | Score | SPI (%) | BCS | # Unmatched Ions | Variable sites | Sequence                                        | MH <sup>+</sup> Calculated (Da) | MH <sup>+</sup> Error (Da) | MH <sup>+</sup> Error (ppm) | Protein MW/pi (Da) | Species      | Accession #               | MS-Digest Index #     | Protein Name              |
|------|-------|---------|-----|------------------|----------------|-------------------------------------------------|---------------------------------|----------------------------|-----------------------------|--------------------|--------------|---------------------------|-----------------------|---------------------------|
| 1    | 14.34 | 97.0    | 9   | 1/16             | Y635y Y641y    | (K) V P I V I N P N A Y D I N L I A I I Y K (S) | 1917.05                         | 161.1674                   | 594.1                       | 193107.5/6.46      | Homo sapiens | <a href="#">148368962</a> | <a href="#">24198</a> | NKF3 kinase family member |

| Fragment-ion (m/z)      | 390.20         | 503.30         | 522.54         | 574.33         | 580.22           | 638.32            | 673.27            | 721.30            | 752.66            | 779.20                              | 787.96            | 791.31 | 801.51         | 844.47            | 847.53         | 1159.71        |
|-------------------------|----------------|----------------|----------------|----------------|------------------|-------------------|-------------------|-------------------|-------------------|-------------------------------------|-------------------|--------|----------------|-------------------|----------------|----------------|
| Frac. Inten. (% of TIC) | 9.06           | 6.83           | 3.04           | 12.07          | 3.20             | 4.88              | 2.81              | 3.84              | 19.30             | 3.76                                | 15.23             | 3.02   | 3.12           | 4.24              | 2.83           | 2.77           |
| Rel. Inten. (% of BP)   | 46.95          | 35.39          | 15.76          | 62.54          | 16.59            | 25.28             | 14.55             | 19.92             | 100.00            | 19.47                               | 78.89             | 15.65  | 16.14          | 21.96             | 14.66          | 14.36          |
| Score                   | 1.00           | 1.00           | 1.00           | 1.00           | 1.00             | 1.00              | 1.00              | 1.00              | 1.00              | 0.50                                | 1.00              | -0.16  | 1.00           | 1.00              | 1.00           | 1.00           |
| Ion-type                | y <sub>2</sub> | y <sub>3</sub> | b <sub>5</sub> | y <sub>4</sub> | y <sup>++8</sup> | b <sup>++11</sup> | y <sup>++10</sup> | y <sup>++11</sup> | b <sup>++13</sup> | b <sup>++14</sup> -H <sub>2</sub> O | b <sup>++14</sup> |        | y <sub>e</sub> | b <sup>++15</sup> | b <sub>8</sub> | y <sub>8</sub> |
| Delta Da                | 0.06           | 0.07           | 0.18           | 0.07           | -0.01            | -0.48             | 0.50              | 0.01              | 0.29              | 0.32                                | 0.08              |        | 0.12           | 0.04              | 0.03           | 0.26           |

# Peak 321

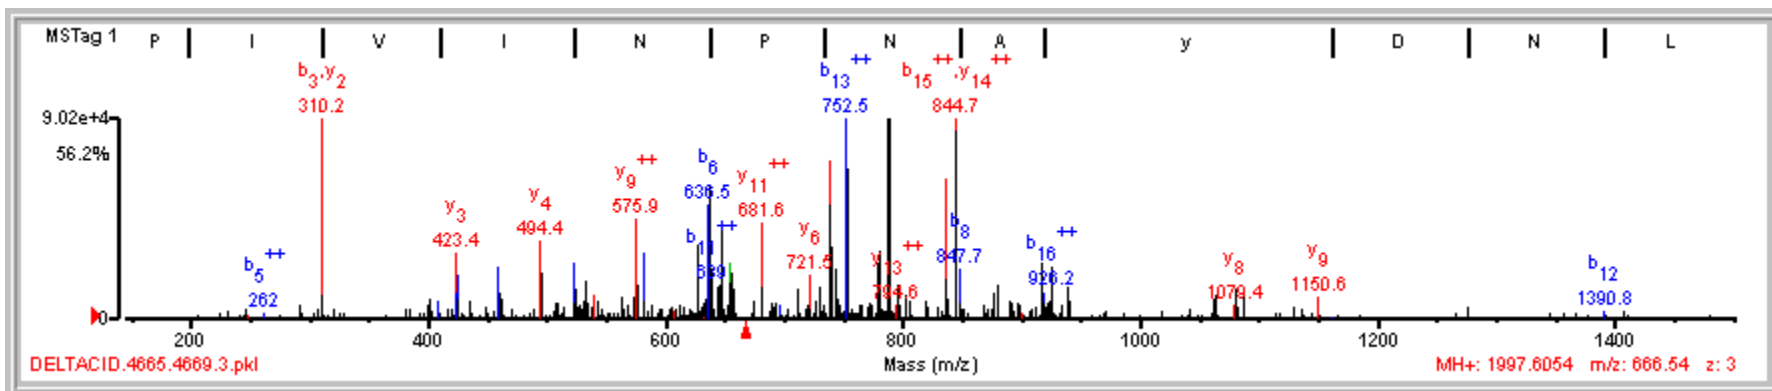

| Rank                    | Score          | SPI (%)        | BCS                          | # Unmatched Ions | Variable sites | Sequence                                          | MH <sup>+</sup> Calculated (Da) | MH <sup>+</sup> Error (Da) | MH <sup>+</sup> Error (ppm) | Protein MW/pI (Da)            | Species      | Accession #               | MS-Digest Index #             | Protein Name                                    |                               |                                                 |                               |        |                               |                |                               |                |                                                 |                               |                |
|-------------------------|----------------|----------------|------------------------------|------------------|----------------|---------------------------------------------------|---------------------------------|----------------------------|-----------------------------|-------------------------------|--------------|---------------------------|-------------------------------|-------------------------------------------------|-------------------------------|-------------------------------------------------|-------------------------------|--------|-------------------------------|----------------|-------------------------------|----------------|-------------------------------------------------|-------------------------------|----------------|
| 1                       | 18.77          | 90.9           | 11                           | 4/25             | Y635y          | (K) V P I V I N P N I A I Y D N L I A I I Y R (S) | 1917.05                         | 80.5574                    | 295.9                       | 193107.5/6.46                 | Homo sapiens | <a href="#">148368962</a> | <a href="#">24198</a>         | NKF3 kinase family member                       |                               |                                                 |                               |        |                               |                |                               |                |                                                 |                               |                |
| Fragment-ion (m/z)      | 310.22         | 423.35         | 459.75                       | 494.42           | 522.50         | 575.92                                            | 581.34                          | 627.84                     | 636.48                      | 638.25                        | 644.52       | 648.51                    | 681.57                        | 730.08                                          | 738.46                        | 743.97                                          | 752.53                        | 780.12 | 788.36                        | 836.48         | 844.71                        | 847.69         | 916.57                                          | 926.54                        | 1080.13        |
| Frac. Inten. (% of TIC) | 7.07           | 3.38           | 2.53                         | 2.68             | 1.48           | 3.22                                              | 2.54                            | 1.75                       | 4.57                        | 4.53                          | 1.88         | 2.60                      | 2.71                          | 1.75                                            | 7.50                          | 1.78                                            | 9.98                          | 2.90   | 12.58                         | 4.22           | 11.30                         | 2.01           | 2.26                                            | 1.30                          | 1.46           |
| Rel. Inten. (% of BP)   | 56.21          | 26.89          | 20.11                        | 21.34            | 11.74          | 25.56                                             | 20.16                           | 13.94                      | 36.29                       | 36.04                         | 14.98        | 20.68                     | 21.54                         | 13.95                                           | 59.63                         | 14.19                                           | 79.31                         | 23.07  | 100.00                        | 33.57          | 89.79                         | 16.00          | 17.99                                           | 10.30                         | 11.58          |
| Score                   | 1.00           | 1.00           | 1.00                         | 1.00             | 1.00           | 1.00                                              | 1.00                            | -0.14                      | 1.00                        | 1.00                          | -0.15        | -0.21                     | 1.00                          | 0.50                                            | 1.00                          | 0.50                                            | 1.00                          | -0.23  | 1.00                          | 1.00           | 1.00                          | 1.00           | 0.50                                            | 1.00                          | 1.00           |
| Ion-type                | b <sub>3</sub> | y <sub>3</sub> | b <sup>++</sup> <sub>9</sub> | a <sub>5</sub>   | b <sub>5</sub> | y <sup>++</sup> <sub>9</sub>                      | b <sup>++</sup> <sub>10</sub>   |                            | b <sub>6</sub>              | b <sup>++</sup> <sub>11</sub> |              |                           | y <sup>++</sup> <sub>11</sub> | y <sup>++</sup> <sub>12</sub> -H <sub>2</sub> O | y <sup>++</sup> <sub>12</sub> | b <sup>++</sup> <sub>13</sub> -H <sub>2</sub> O | b <sup>++</sup> <sub>13</sub> |        | b <sup>++</sup> <sub>14</sub> | y <sub>7</sub> | b <sup>++</sup> <sub>15</sub> | b <sub>8</sub> | b <sup>++</sup> <sub>16</sub> -H <sub>2</sub> O | b <sup>++</sup> <sub>16</sub> | y <sub>8</sub> |
| Delta Da                | 0.01           | 0.09           | -0.02                        | 0.05             | 0.14           | 0.16                                              | 0.05                            |                            | 0.07                        | -0.55                         |              |                           | 0.26                          | 0.75                                            | 0.13                          | 0.61                                            | 0.16                          |        | 0.48                          | 0.03           | 0.28                          | 0.19           | -0.38                                           | 0.58                          | 0.65           |
|                         |                | y <sub>2</sub> |                              | y <sub>4</sub>   |                | 0.12                                              |                                 |                            |                             |                               |              |                           |                               |                                                 |                               |                                                 |                               |        |                               |                | y <sup>++</sup> <sub>14</sub> |                |                                                 |                               |                |



# Peak 323

assignment

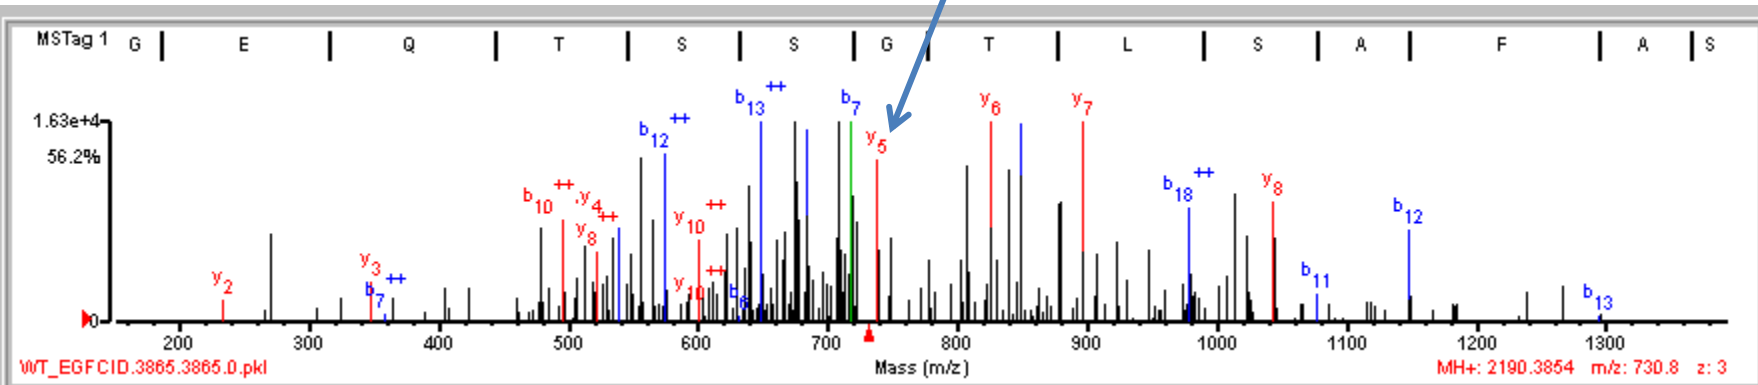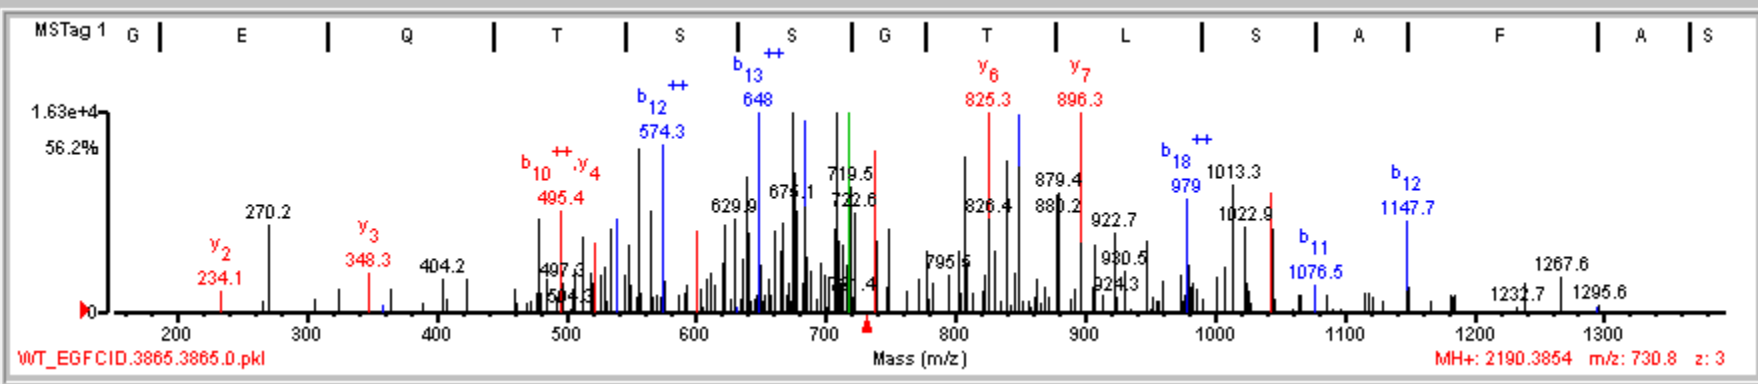

| Rank | Score | SPI (%) | BCS | # Unmatched Ions | Variable sites | Sequence                                            | MH <sup>+</sup> Calculated (Da) | MH <sup>+</sup> Error (Da)                      | MH <sup>+</sup> Error (ppm)   | Protein MW/pI (Da)                              | Species                       | Accession #                                     | MS-Digest Index #             | Protein Name                  |                |                                 |                |                                                 |                               |                                  |                |                               |                |                 |         |
|------|-------|---------|-----|------------------|----------------|-----------------------------------------------------|---------------------------------|-------------------------------------------------|-------------------------------|-------------------------------------------------|-------------------------------|-------------------------------------------------|-------------------------------|-------------------------------|----------------|---------------------------------|----------------|-------------------------------------------------|-------------------------------|----------------------------------|----------------|-------------------------------|----------------|-----------------|---------|
| 1    | 13.27 | 93.0    | 7   | 2/19             | Y685y          | (R) K G E Q T S S G/T L S A F I A S / y F N S K (V) | 2110.01                         | 80.3767                                         | 187.4                         | 82448.2/5.34                                    | Homo sapiens                  | <a href="#">148491082</a>                       | <a href="#">24837</a>         | disabled homolog 2            |                |                                 |                |                                                 |                               |                                  |                |                               |                |                 |         |
|      |       |         |     |                  |                |                                                     | 556.37                          | 565.36                                          | 574.27                        | 639.08                                          | 648.04                        | 674.39                                          | 683.39                        | 709.11                        | 738.30         | 807.65                          | 825.29         | 839.92                                          | 848.50                        | 878.44                           | 896.31         | 979.00                        | 1013.30        | 1043.42         | 1147.66 |
|      |       |         |     |                  |                |                                                     | 3.81                            | 3.09                                            | 3.45                          | 4.70                                            | 4.48                          | 9.68                                            | 7.27                          | 7.06                          | 5.16           | 4.56                            | 9.19           | 3.74                                            | 7.04                          | 6.84                             | 5.79           | 3.51                          | 3.21           | 4.49            | 2.92    |
|      |       |         |     |                  |                |                                                     | 39.33                           | 31.91                                           | 35.64                         | 48.54                                           | 46.30                         | 100.00                                          | 75.07                         | 72.90                         | 53.29          | 47.08                           | 94.95          | 38.67                                           | 72.73                         | 70.66                            | 59.82          | 36.25                         | 33.18          | 46.38           | 30.14   |
|      |       |         |     |                  |                |                                                     | Score                           | 0.50                                            | 1.00                          | 0.50                                            | 1.00                          | 0.50                                            | 1.00                          | 1.00                          | 0.50           | 1.00                            | 0.50           | 1.00                                            | 1.00                          | 0.50                             | 1.00           | 1.00                          | -0.33          | 1.00            | 1.00    |
|      |       |         |     |                  |                |                                                     | Ion-type                        | b <sup>++</sup> <sub>12</sub> -H <sub>2</sub> O | b <sup>++</sup> <sub>12</sub> | b <sup>++</sup> <sub>13</sub> -H <sub>2</sub> O | b <sup>++</sup> <sub>13</sub> | b <sup>++</sup> <sub>14</sub> -H <sub>2</sub> O | b <sup>++</sup> <sub>14</sub> | y <sup>++</sup> <sub>12</sub> | y <sub>5</sub> | y <sub>6</sub> -NH <sub>3</sub> | y <sub>6</sub> | b <sup>++</sup> <sub>16</sub> -H <sub>2</sub> O | a <sub>9</sub>                | y <sub>7</sub> -H <sub>2</sub> O | y <sub>7</sub> | b <sup>++</sup> <sub>18</sub> | y <sub>8</sub> | b <sub>12</sub> |         |
|      |       |         |     |                  |                |                                                     | Delta Da                        |                                                 | 0.08                          | -0.01                                           | 0.27                          | 0.22                                            | 0.06                          | 0.05                          | 0.79           | 0.01                            | -0.64          | -0.03                                           | 0.56                          | 0.09                             | 0.10           | -0.04                         | 0.08           | -0.00           | 0.10    |
|      |       |         |     |                  |                |                                                     |                                 |                                                 |                               |                                                 |                               |                                                 |                               |                               |                |                                 |                |                                                 | b <sup>++</sup> <sub>16</sub> |                                  |                |                               |                |                 |         |
|      |       |         |     |                  |                |                                                     |                                 |                                                 |                               |                                                 |                               |                                                 |                               |                               |                |                                 |                |                                                 | 0.13                          |                                  |                |                               |                |                 |         |

# Peak 324

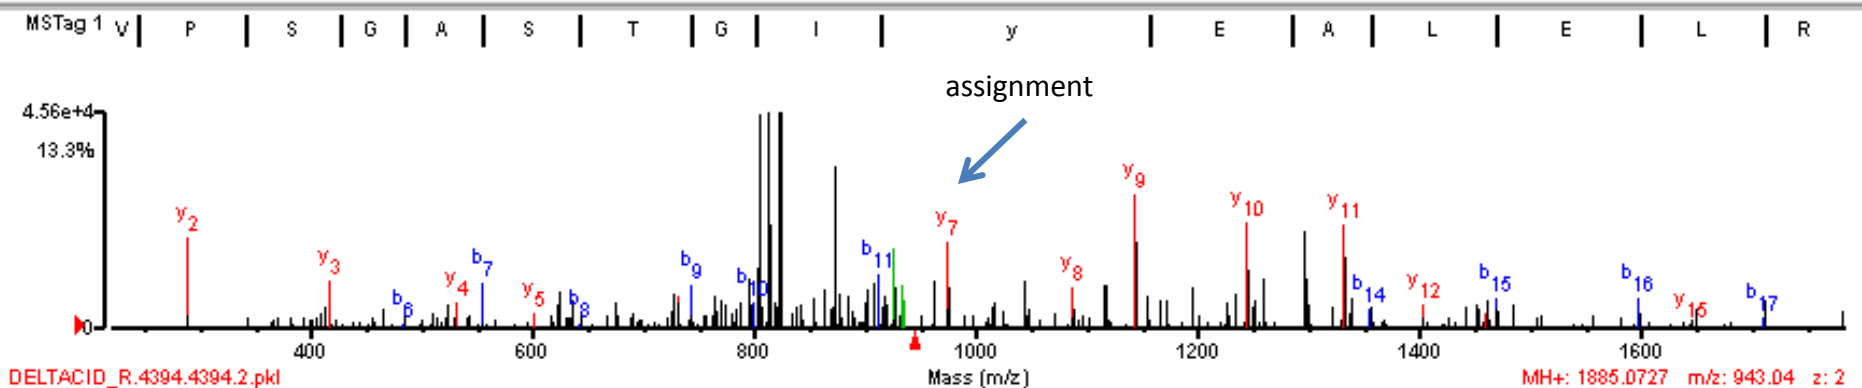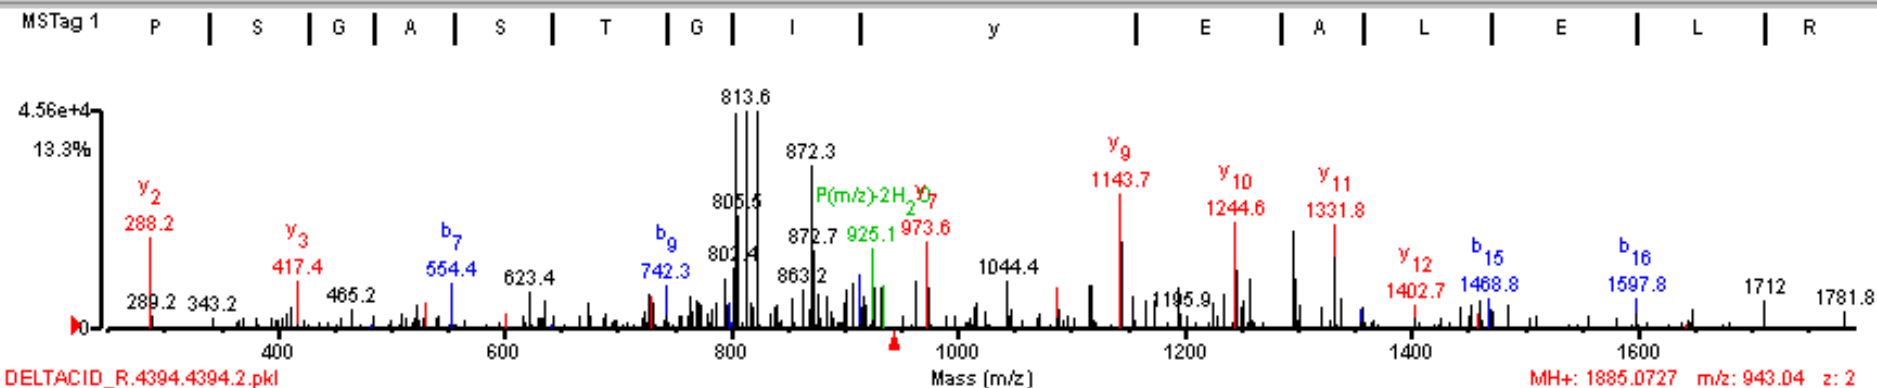

| Rank | Score | SPI (%) | BCS | # Unmatched Ions | Variable sites | Sequence                                    | MH <sup>+</sup> Calculated (Da) | MH <sup>+</sup> Error (Da) | MH <sup>+</sup> Error (ppm) | Protein MW/pl (Da) | Species      | Accession #               | MS-Digest Index #     | Protein Name |
|------|-------|---------|-----|------------------|----------------|---------------------------------------------|---------------------------------|----------------------------|-----------------------------|--------------------|--------------|---------------------------|-----------------------|--------------|
| 1    | 13.09 | 80.6    | 10  | 11/25            | Y44y           | (R) A A/V/P S/G A/S/T/G/I/Y/E A L\E/L R (D) | 1804.94                         | 80.1288                    | 86.2                        | 46932.0/7.58       | Homo sapiens | <a href="#">153267427</a> | <a href="#">4613</a>  | enolase 3    |
| 1    | 13.09 | 80.6    | 10  | 11/25            | Y44y           | (R) A A/V/P S/G A/S/T/G/I/Y/E A L\E/L R (D) | 1804.94                         | 80.1288                    | 86.2                        | 46932.0/7.58       | Homo sapiens | <a href="#">153267448</a> | <a href="#">7316</a>  | enolase 3    |
| 1    | 13.09 | 80.6    | 10  | 11/25            | Y44y           | (R) A A/V/P S/G A/S/T/G/I/Y/E A L\E/L R (D) | 1804.94                         | 80.1288                    | 86.2                        | 47169.2/7.01       | Homo sapiens | <a href="#">4503571</a>   | <a href="#">17636</a> | enolase 1    |
| 1    | 13.09 | 80.6    | 10  | 11/25            | Y44y           | (R) A A/V/P S/G A/S/T/G/I/Y/E A L\E/L R (D) | 1804.94                         | 80.1288                    | 86.2                        | 47268.8/4.91       | Homo sapiens | <a href="#">5803011</a>   | <a href="#">35485</a> | enolase 2    |

  

| Fragment-ion (m/z)     | 288.23         | 622.11            | 730.55         | 742.32         | 795.50 | 802.36 | 804.67 | 813.62                              | 822.66            | 854.07 | 872.32            | 912.69          | 917.94         | 973.58 | 1044.42 | 1086.71 | 1116.34 | 1143.66        | 1194.67 | 1244.61         | 1258.59 | 1295.83 | 1298.83 | 1331.75         | 1468.84         |
|------------------------|----------------|-------------------|----------------|----------------|--------|--------|--------|-------------------------------------|-------------------|--------|-------------------|-----------------|----------------|--------|---------|---------|---------|----------------|---------|-----------------|---------|---------|---------|-----------------|-----------------|
| Frac. Inten.(% of TIC) | 1.84           | 1.26              | 1.07           | 1.00           | 1.52   | 1.06   | 6.21   | 6.60                                | 47.06             | 1.03   | 4.72              | 1.10            | 1.01           | 1.87   | 1.12    | 1.02    | 1.09    | 5.05           | 1.01    | 3.24            | 1.17    | 3.13    | 1.02    | 3.23            | 1.58            |
| Rel. Inten.(% of BP)   | 3.90           | 2.67              | 2.28           | 2.12           | 3.23   | 2.26   | 13.19  | 14.03                               | 100.00            | 2.19   | 10.03             | 2.33            | 2.15           | 3.97   | 2.38    | 2.16    | 2.32    | 10.74          | 2.14    | 6.89            | 2.49    | 6.66    | 2.17    | 6.87            | 3.35            |
| Score                  | 1.00           | 1.00              | 1.00           | 1.00           | -0.03  | -0.02  | -0.13  | 0.50                                | 1.00              | -0.02  | 1.00              | 1.00            | -0.02          | 1.00   | -0.02   | 1.00    | -0.02   | 1.00           | -0.02   | 1.00            | -0.02   | -0.07   | -0.02   | 1.00            | 1.00            |
| Ion-type               | y <sub>2</sub> | y <sup>++10</sup> | y <sub>3</sub> | b <sub>9</sub> |        |        |        | y <sup>++15</sup> -H <sub>2</sub> O | y <sup>++15</sup> |        | y <sup>++16</sup> | b <sub>11</sub> | y <sub>7</sub> |        |         |         |         | y <sub>9</sub> |         | y <sub>10</sub> |         |         |         | y <sub>11</sub> | b <sub>15</sub> |
| Delta Da               | 0.03           | -0.69             | 0.14           | -0.05          |        |        |        | 0.24                                | 0.27              |        | 0.40              | 0.21            | 0.14           |        |         | 0.19    |         | 0.12           |         | 0.02            |         |         |         | 0.13            | 0.17            |

# Peak 325

Ions that verify assignment

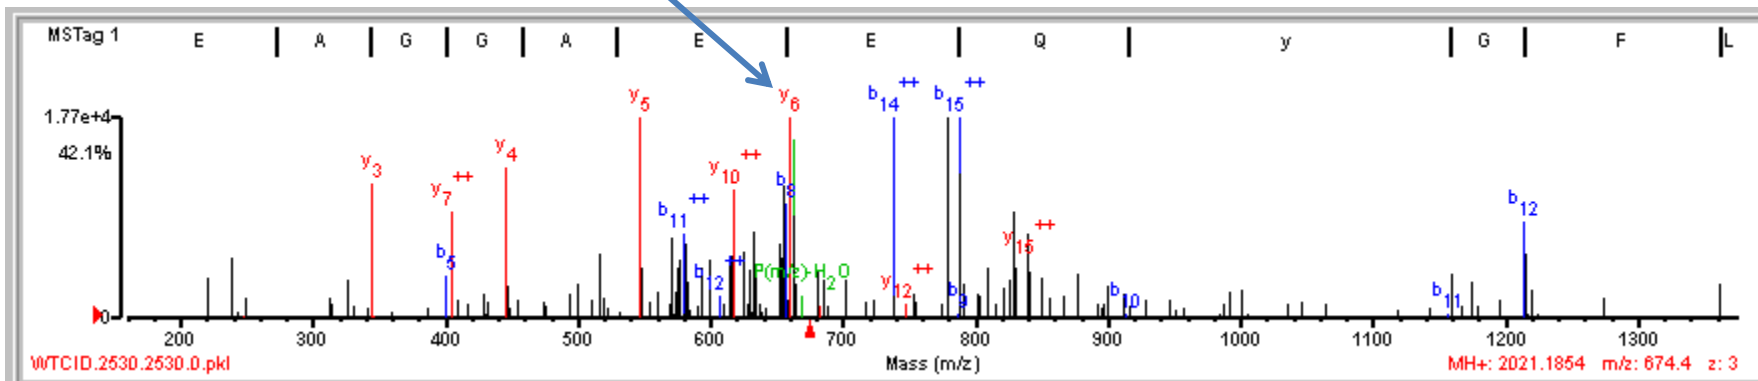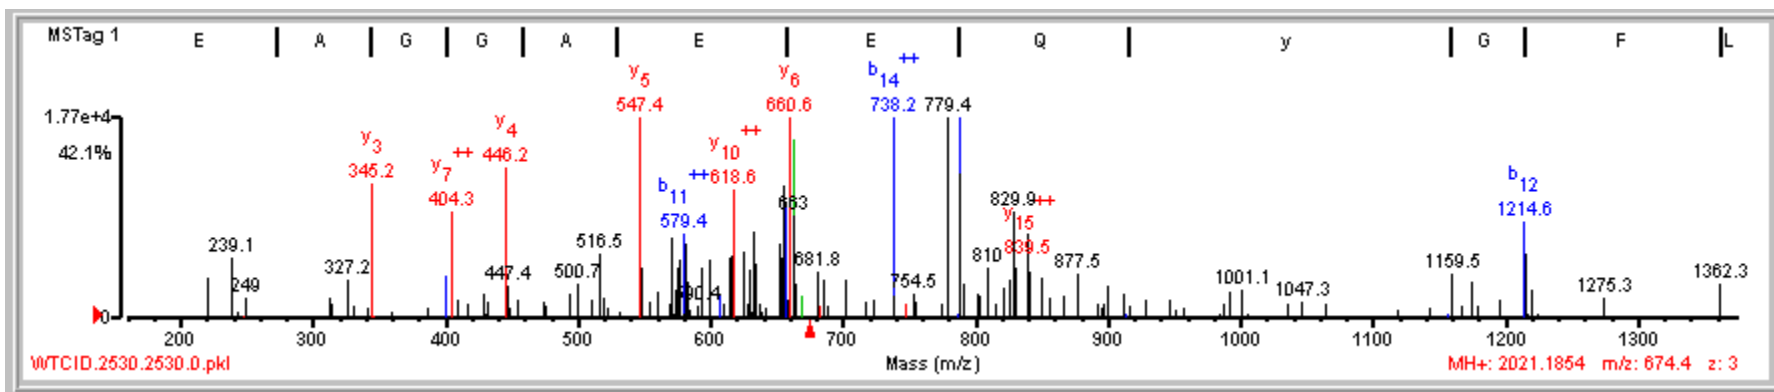

| Rank                    | Score          | SPI (%)                      | BCS            | # Unmatched Ions | Variable sites                | Sequence                                                | MH <sup>+</sup> Calculated (Da) | MH <sup>+</sup> Error (Da) | MH <sup>+</sup> Error (ppm) | Protein MW/pl (Da)            | Species                                         | Accession #                   | MS-Digest Index #             | Protein Name                      |        |        |         |
|-------------------------|----------------|------------------------------|----------------|------------------|-------------------------------|---------------------------------------------------------|---------------------------------|----------------------------|-----------------------------|-------------------------------|-------------------------------------------------|-------------------------------|-------------------------------|-----------------------------------|--------|--------|---------|
| 1                       | 11.55          | 82.9                         | 9              | 4/17             | Y1062y                        | (K) A A E A / G G A E / Q Y / G I F / L I T / P T K (Q) | 1940.92                         | 80.2618                    | 146.2                       | 270635.7/4.73                 | Homo sapiens                                    | <a href="#">153945728</a>     | <a href="#">586</a>           | microtubule-associated protein 1B |        |        |         |
| Fragment-ion (m/z)      | 345.16         | 404.29                       | 446.21         | 547.36           | 575.52                        | 579.45                                                  | 615.25                          | 618.64                     | 655.56                      | 657.47                        | 660.57                                          | 738.24                        | 779.43                        | 788.45                            | 829.86 | 840.53 | 1214.55 |
| Frac. Inten. (% of TIC) | 4.07           | 3.12                         | 5.36           | 7.78             | 3.40                          | 2.60                                                    | 3.59                            | 3.79                       | 4.27                        | 3.90                          | 10.55                                           | 6.63                          | 8.21                          | 18.09                             | 5.87   | 3.82   | 4.94    |
| Rel. Inten. (% of BP)   | 22.48          | 17.24                        | 29.61          | 43.00            | 18.82                         | 14.39                                                   | 19.85                           | 20.96                      | 23.62                       | 21.55                         | 58.29                                           | 36.64                         | 45.39                         | 100.00                            | 32.43  | 21.12  | 27.32   |
| Score                   | 1.00           | 1.00                         | 1.00           | 1.00             | -0.19                         | 1.00                                                    | -0.20                           | 1.00                       | -0.24                       | 1.00                          | 1.00                                            | 1.00                          | 0.50                          | 1.00                              | -0.32  | 1.00   | 1.00    |
| Ion-type                | y <sub>3</sub> | y <sup>++</sup> <sub>7</sub> | y <sub>4</sub> | y <sub>5</sub>   | b <sup>++</sup> <sub>11</sub> | y <sup>++</sup> <sub>10</sub>                           | y <sub>5</sub>                  | b <sub>8</sub>             | y <sub>e</sub>              | b <sup>++</sup> <sub>14</sub> | b <sup>++</sup> <sub>15</sub> -H <sub>2</sub> O | b <sup>++</sup> <sub>15</sub> | y <sup>++</sup> <sub>15</sub> | b <sub>12</sub>                   |        |        |         |
| Delta Da                | -0.05          | 0.06                         | -0.05          | 0.05             |                               | 0.24                                                    |                                 | 0.35                       |                             | 0.19                          | 0.18                                            | 0.44                          | 0.11                          | 0.13                              |        | 0.66   | 0.11    |









# Peak 329

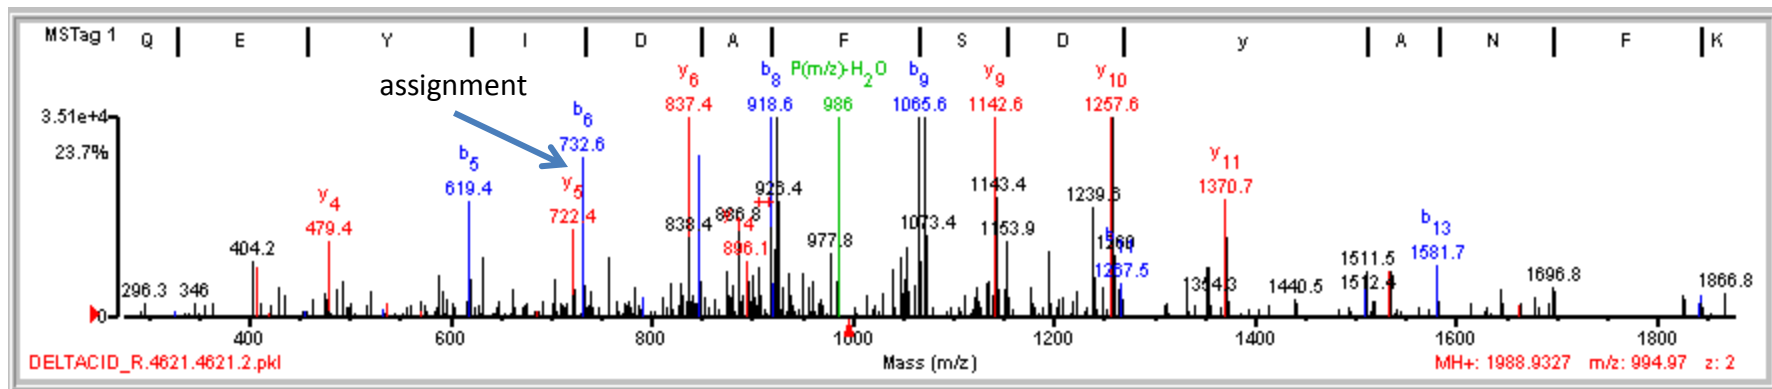

| Rank                    | Score          | SPI (%)        | BCS            | # Unmatched Ions | Variable sites | Sequence                                    | MH <sup>+</sup> Calculated (Da) | MH <sup>+</sup> Error (Da)          | MH <sup>+</sup> Error (ppm) | Protein MW/pI (Da) | Species        | Accession #                      | MS-Digest Index #                | Protein Name                                                       |                |                |         |                 |                 |                                   |                 |                 |         |                 |
|-------------------------|----------------|----------------|----------------|------------------|----------------|---------------------------------------------|---------------------------------|-------------------------------------|-----------------------------|--------------------|----------------|----------------------------------|----------------------------------|--------------------------------------------------------------------|----------------|----------------|---------|-----------------|-----------------|-----------------------------------|-----------------|-----------------|---------|-----------------|
| 1                       | 18.27          | 95.8           | 10             | 3/24             | Y789y          | (K) V V/Q E Y I D I A F S/D/Y I A N F K (-) | 1908.90                         | 80.0313                             | 32.7                        | 89703.5/6.14       | Homo sapiens   | <a href="#">18450371</a>         | <a href="#">10043</a>            | protein tyrosine phosphatase, receptor type, A isoform 2 precursor |                |                |         |                 |                 |                                   |                 |                 |         |                 |
| 1                       | 18.27          | 95.8           | 10             | 3/24             | Y798y          | (K) V V/Q E Y I D I A F S/D/Y I A N F K (-) | 1908.90                         | 80.0313                             | 32.7                        | 90719.6/6.23       | Homo sapiens   | <a href="#">4506303</a>          | <a href="#">13566</a>            | protein tyrosine phosphatase, receptor type, A isoform 1 precursor |                |                |         |                 |                 |                                   |                 |                 |         |                 |
| 1                       | 18.27          | 95.8           | 10             | 3/24             | Y789y          | (K) V V/Q E Y I D I A F S/D/Y I A N F K (-) | 1908.90                         | 80.0313                             | 32.7                        | 89703.5/6.14       | Homo sapiens   | <a href="#">18450369</a>         | <a href="#">14135</a>            | protein tyrosine phosphatase, receptor type, A isoform 2 precursor |                |                |         |                 |                 |                                   |                 |                 |         |                 |
| Fragment-ion (m/z)      | 479.41         | 619.45         | 722.37         | 732.58           | 837.39         | 847.44                                      | 874.37                          | 886.79                              | 896.09                      | 918.58             | 924.48         | 1047.55                          | 1053.40                          | 1065.62                                                            | 1071.53        | 1142.56        | 1153.93 | 1239.56         | 1257.56         | 1352.56                           | 1370.68         | 1510.54         | 1534.53 | 1581.73         |
| Frac. Inten. (% of TIC) | 1.24           | 2.54           | 2.19           | 2.84             | 4.52           | 2.53                                        | 1.36                            | 2.11                                | 2.15                        | 5.21               | 18.86          | 2.13                             | 2.05                             | 8.37                                                               | 10.67          | 5.53           | 1.40    | 2.47            | 11.38           | 2.07                              | 4.09            | 1.54            | 1.49    | 1.27            |
| Rel. Inten. (% of BP)   | 6.57           | 13.47          | 11.59          | 15.04            | 23.99          | 13.43                                       | 7.21                            | 11.20                               | 11.38                       | 27.63              | 100.00         | 11.29                            | 10.85                            | 44.39                                                              | 56.57          | 29.30          | 7.40    | 13.09           | 60.31           | 10.99                             | 21.67           | 8.16            | 7.91    | 6.71            |
| Score                   | 1.00           | 1.00           | 1.00           | 1.00             | 1.00           | 1.00                                        | -0.07                           | 0.50                                | 1.00                        | 1.00               | 1.00           | 0.50                             | 0.50                             | 1.00                                                               | 1.00           | 1.00           | -0.07   | 0.50            | 1.00            | 0.50                              | 1.00            | 1.00            | -0.08   | 1.00            |
| Ion-type                | y <sub>4</sub> | b <sub>5</sub> | y <sub>5</sub> | b <sub>6</sub>   | y <sub>6</sub> | b <sub>7</sub>                              |                                 | y <sub>++14</sub> -H <sub>2</sub> O | y <sub>++14</sub>           | b <sub>8</sub>     | y <sub>7</sub> | b <sub>9</sub> -H <sub>2</sub> O | y <sub>8</sub> -H <sub>2</sub> O | b <sub>9</sub>                                                     | y <sub>8</sub> | y <sub>9</sub> |         | a <sub>11</sub> | y <sub>10</sub> | y <sub>11</sub> -H <sub>2</sub> O | y <sub>11</sub> | b <sub>12</sub> |         | b <sub>13</sub> |
| Delta Da                | 0.15           | 0.14           | 0.08           | 0.19             | 0.07           | 0.02                                        |                                 | -0.07                               | 0.22                        | 0.12               | 0.13           | 0.04                             | -0.01                            | 0.09                                                               | 0.11           | 0.10           |         | -0.03           | 0.08            | 0.00                              | 0.11            | -0.07           |         | 0.08            |

# Peak 330

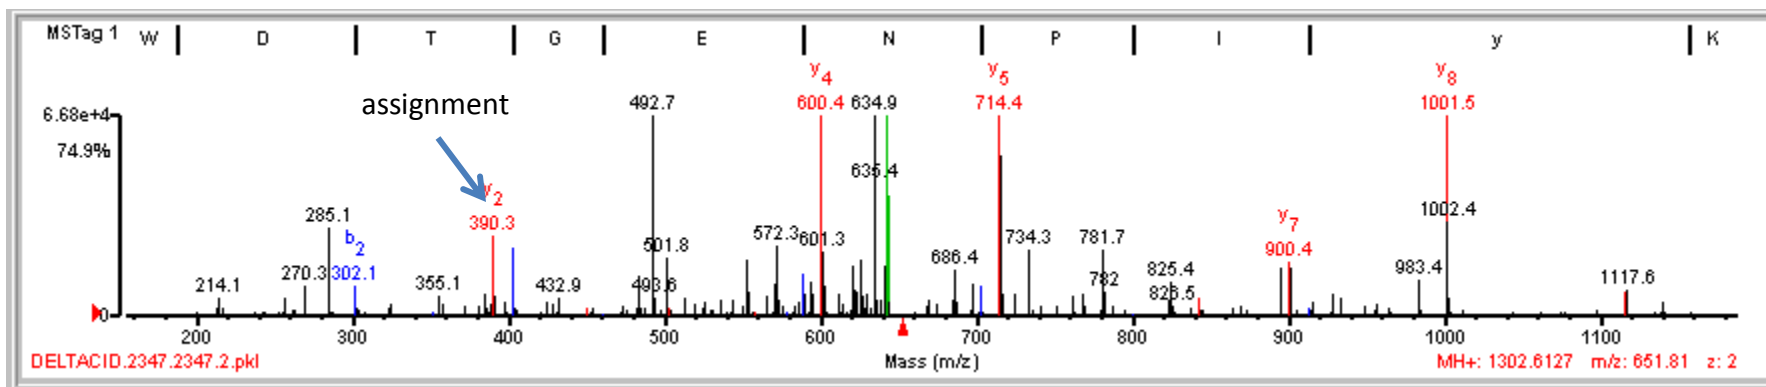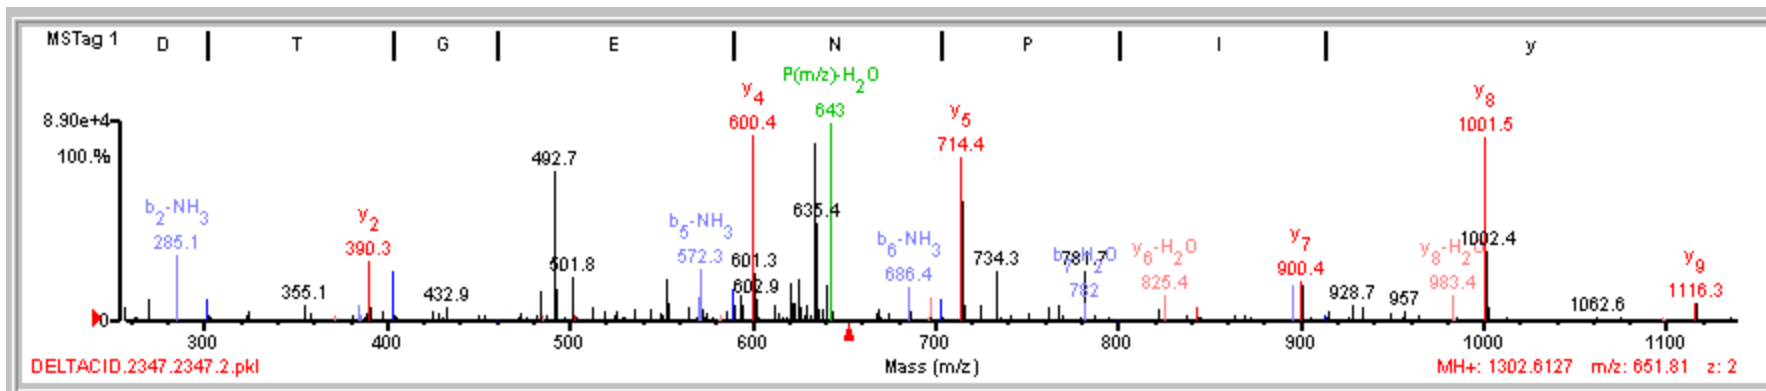

| Rank | Score | SPI (%) | BCS | # Unmatched Ions | Variable sites | Sequence                  | MH <sup>+</sup> Calculated (Da) | MH <sup>+</sup> Error (Da) | MH <sup>+</sup> Error (ppm) | Protein MW/pl (Da) | Species      | Accession #              | MS-Digest Index #     | Protein Name                         |
|------|-------|---------|-----|------------------|----------------|---------------------------|---------------------------------|----------------------------|-----------------------------|--------------------|--------------|--------------------------|-----------------------|--------------------------------------|
| 1    | 10.38 | 71.7    | 6   | 10/25            | Y783y          | (K)W/D T G E N/P I/y K(S) | 1222.57                         | 80.0388                    | 55.7                        | 88415.9/5.27       | Homo sapiens | <a href="#">19743813</a> | <a href="#">2162</a>  | integrin beta 1 isoform 1A precursor |
| 1    | 10.38 | 71.7    | 6   | 10/25            | Y783y          | (K)W/D T G E N/P I/y K(S) | 1222.57                         | 80.0388                    | 55.7                        | 88415.9/5.27       | Homo sapiens | <a href="#">19743823</a> | <a href="#">35513</a> | integrin beta 1 isoform 1A precursor |

  

| Fragment-ion (m/z)      | 285.07         | 302.14         | 390.27         | 403.30 | 483.98 | 492.66                                         | 501.82                       | 553.27 | 572.28 | 589.22         | 594.44 | 600.35         | 621.28 | 625.74 | 635.40 | 641.02 | 686.37                          | 714.40         | 734.32 | 781.66                           | 825.43                           | 895.59                          | 900.45         | 1001.53        | 1116.31        |
|-------------------------|----------------|----------------|----------------|--------|--------|------------------------------------------------|------------------------------|--------|--------|----------------|--------|----------------|--------|--------|--------|--------|---------------------------------|----------------|--------|----------------------------------|----------------------------------|---------------------------------|----------------|----------------|----------------|
| Frac. Inten. (% of TIC) | 3.33           | 1.55           | 3.32           | 2.76   | 2.02   | 8.68                                           | 2.64                         | 2.73   | 3.14   | 2.19           | 1.89   | 10.65          | 3.37   | 2.55   | 5.25   | 1.66   | 2.06                            | 13.36          | 2.34   | 3.07                             | 1.70                             | 1.87                            | 3.62           | 12.56          | 1.71           |
| Rel. Inten. (% of BP)   | 24.92          | 11.60          | 24.83          | 20.69  | 15.10  | 64.96                                          | 19.73                        | 20.47  | 23.48  | 16.38          | 14.13  | 79.73          | 25.19  | 19.08  | 39.31  | 12.42  | 15.44                           | 100.00         | 17.48  | 22.98                            | 12.73                            | 13.98                           | 27.12          | 94.00          | 12.76          |
| Score                   | -0.25          | 1.00           | 1.00           | 1.00   | -0.15  | 0.50                                           | 1.00                         | -0.20  | -0.23  | 1.00           | -0.14  | 1.00           | -0.25  | -0.19  | -0.39  | -0.12  | 0.50                            | 1.00           | -0.17  | 0.50                             | 0.50                             | 0.50                            | 1.00           | 1.00           | 1.00           |
| Ion-type                | b <sub>2</sub> | y <sub>2</sub> | b <sub>3</sub> |        |        | y <sup>++</sup> <sub>8</sub> -H <sub>2</sub> O | y <sup>++</sup> <sub>8</sub> |        |        | b <sub>5</sub> |        | y <sub>4</sub> |        |        |        |        | b <sub>6</sub> -NH <sub>3</sub> | y <sub>5</sub> |        | b <sub>7</sub> -H <sub>2</sub> O | y <sub>6</sub> -H <sub>2</sub> O | b <sub>8</sub> -NH <sub>3</sub> | y <sub>7</sub> | y <sub>8</sub> | y <sub>9</sub> |
| Delta Da                |                | 0.03           | 0.13           | 0.14   |        | 0.44                                           | 0.60                         |        |        | -0.01          |        | 0.07           |        |        |        |        | 0.13                            | 0.08           |        | -0.65                            | 0.08                             | -0.79                           | 0.06           | 0.10           | -0.15          |



# Peak 332

assignment

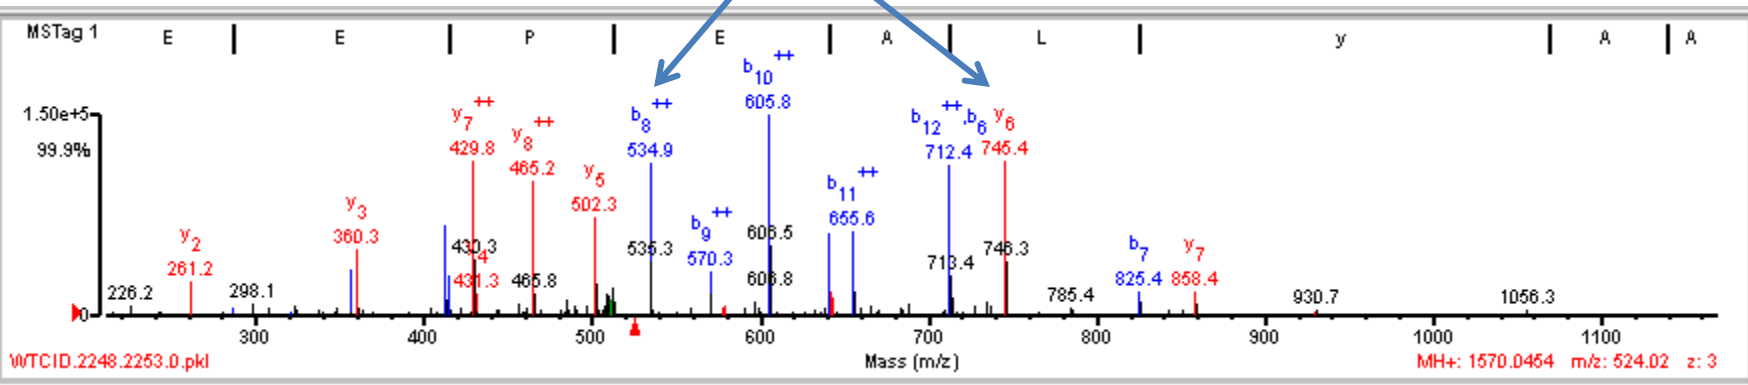

| Rank | Score | SPI (%) | BCS | # Unmatched Ions | Variable sites | Sequence                                            | MH <sup>+</sup> Calculated (Da) | MH <sup>+</sup> Error (Da) | MH <sup>+</sup> Error (ppm) | Protein MW/pl (Da) | Species      | Accession #              | MS-Digest Index #     | Protein Name            |
|------|-------|---------|-----|------------------|----------------|-----------------------------------------------------|---------------------------------|----------------------------|-----------------------------|--------------------|--------------|--------------------------|-----------------------|-------------------------|
| 1    | 18.11 | 95.2    | 8   | 4/23             | Y967y          | (K) R E E   P E   A   L   Y   A   A   V   N   K (K) | 1489.76                         | 80.2809                    | 200.4                       | 141689.5/7.77      | Homo sapiens | <a href="#">22325383</a> | <a href="#">5213</a>  | intersectin 2 isoform 2 |
| 1    | 18.11 | 95.2    | 8   | 4/23             | Y940y          | (K) R E E   P E   A   L   Y   A   A   V   N   K (K) | 1489.76                         | 80.2809                    | 200.4                       | 190365.7/8.42      | Homo sapiens | <a href="#">22325381</a> | <a href="#">25905</a> | intersectin 2 isoform 3 |
| 1    | 18.11 | 95.2    | 8   | 4/23             | Y967y          | (K) R E E   P E   A   L   Y   A   A   V   N   K (K) | 1489.76                         | 80.2809                    | 200.4                       | 193331.3/8.32      | Homo sapiens | <a href="#">22325385</a> | <a href="#">27225</a> | intersectin 2 isoform 1 |

| Fragment-ion (m/z)     | 261.15         | 356.75                        | 360.27         | 413.28                        | 415.28         | 429.80                        | 465.25                        | 485.42                          | 489.64 | 502.31         | 509.45 | 534.91                        | 570.31                        | 578.38                         | 605.84                         | 641.33         | 655.59                         | 683.39 | 712.40                         | 734.67 | 745.36         | 825.42         | 858.41         |
|------------------------|----------------|-------------------------------|----------------|-------------------------------|----------------|-------------------------------|-------------------------------|---------------------------------|--------|----------------|--------|-------------------------------|-------------------------------|--------------------------------|--------------------------------|----------------|--------------------------------|--------|--------------------------------|--------|----------------|----------------|----------------|
| Frac. Inten.(% of TIC) | 1.49           | 2.14                          | 3.24           | 4.45                          | 1.98           | 10.02                         | 7.11                          | 1.14                            | 1.06   | 5.72           | 1.78   | 9.12                          | 3.41                          | 0.94                           | 12.14                          | 5.89           | 4.74                           | 0.97   | 9.06                           | 0.99   | 9.23           | 1.76           | 1.64           |
| Rel. Inten.(% of BP)   | 12.24          | 17.62                         | 26.67          | 36.67                         | 16.27          | 82.52                         | 58.55                         | 9.35                            | 8.74   | 47.08          | 14.62  | 75.15                         | 28.06                         | 7.77                           | 100.00                         | 48.52          | 39.03                          | 7.95   | 74.64                          | 8.14   | 76.06          | 14.49          | 13.55          |
| Score                  | 1.00           | 1.00                          | 1.00           | 1.00                          | 1.00           | 1.00                          | 1.00                          | 0.50                            | -0.09  | 1.00           | -0.15  | 1.00                          | 1.00                          | 1.00                           | 1.00                           | 1.00           | 1.00                           | -0.08  | 1.00                           | -0.08  | 1.00           | 1.00           | 1.00           |
| Ion-type               | y <sub>2</sub> | b <sup>+++</sup> <sub>e</sub> | y <sub>3</sub> | b <sup>+++</sup> <sub>7</sub> | b <sub>3</sub> | y <sup>+++</sup> <sub>7</sub> | y <sup>+++</sup> <sub>8</sub> | y <sub>5</sub> -NH <sub>3</sub> |        | y <sub>5</sub> |        | b <sup>+++</sup> <sub>8</sub> | b <sup>+++</sup> <sub>9</sub> | y <sup>+++</sup> <sub>10</sub> | b <sup>+++</sup> <sub>10</sub> | b <sub>5</sub> | b <sup>+++</sup> <sub>11</sub> |        | b <sub>e</sub>                 |        | y <sub>e</sub> | b <sub>7</sub> | y <sub>7</sub> |
| Delta Da               | -0.01          | 0.08                          | 0.05           | 0.07                          | 0.09           | 0.09                          | 0.02                          | 0.15                            |        | 0.01           |        | 0.19                          | 0.07                          | 0.10                           | 0.08                           | 0.04           | 0.30                           |        | 0.07                           |        | 0.03           | 0.01           | -0.00          |
|                        |                |                               |                |                               |                |                               |                               |                                 |        |                |        |                               |                               |                                |                                |                |                                |        | b <sup>+++</sup> <sub>12</sub> |        |                |                |                |

# Peak 333

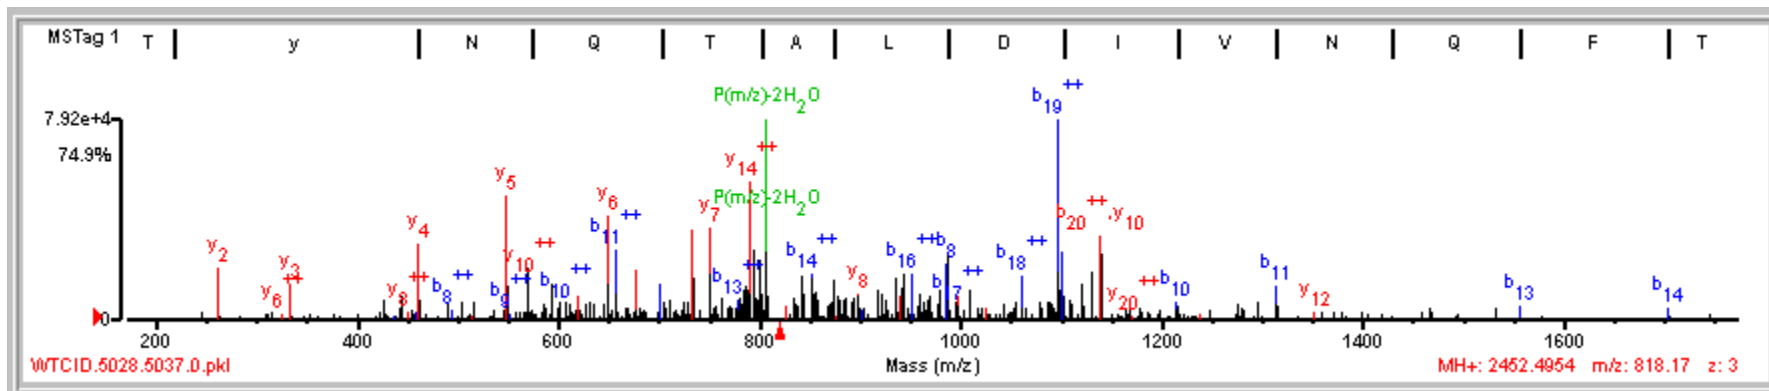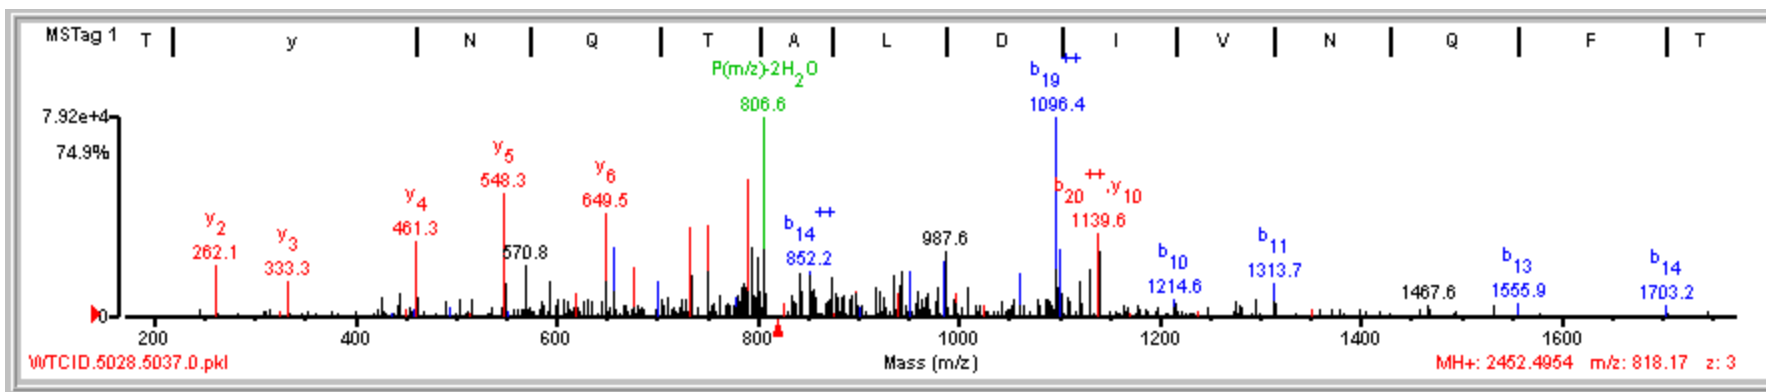

| Rank                    | Score          | SPI (%)        | BCS               | # Unmatched Ions | Variable sites    | Sequence                                                  | MH <sup>+</sup> Calculated (Da) | MH <sup>+</sup> Error (Da) | MH <sup>+</sup> Error (ppm) | Protein MW/pl (Da) | Species      | Accession #                         | MS-Digest Index #     | Protein Name               |                |        |                   |        |                |                   |                   |                |                                     |                   |                 |      |
|-------------------------|----------------|----------------|-------------------|------------------|-------------------|-----------------------------------------------------------|---------------------------------|----------------------------|-----------------------------|--------------------|--------------|-------------------------------------|-----------------------|----------------------------|----------------|--------|-------------------|--------|----------------|-------------------|-------------------|----------------|-------------------------------------|-------------------|-----------------|------|
| 1                       | 19.07          | 87.2           | 13                | 4/25             | Y253y             | (R) N T Y N/Q T A   L   D   I V   N Q/P/T/S/Q/A\ S\ R (E) | 2372.15                         | 80.3478                    | 155.5                       | 126711.8/6.73      | Homo sapiens | <a href="#">24638431</a>            | <a href="#">28222</a> | cask-interacting protein 2 |                |        |                   |        |                |                   |                   |                |                                     |                   |                 |      |
| Fragment-ion (m/z)      | 461.33         | 548.33         | 570.44            | 649.46           | 657.50            | 676.50                                                    | 733.91                          | 750.58                     | 790.69                      | 794.87             | 800.74       | 843.18                              | 852.17                | 873.62                     | 897.55         | 935.11 | 940.44            | 944.11 | 986.34         | 1060.54           | 1096.40           | 1101.45        | 1130.41                             | 1139.63           | 1313.71         |      |
| Frac. Inten. (% of TIC) | 3.05           | 5.40           | 3.61              | 5.09             | 3.38              | 2.16                                                      | 4.29                            | 4.72                       | 6.02                        | 2.49               | 4.45         | 2.57                                | 3.79                  | 2.34                       | 2.30           | 3.38   | 2.19              | 2.46   | 4.81           | 2.23              | 13.82             | 3.25           | 2.40                                | 6.99              | 2.81            |      |
| Rel. Inten. (% of BP)   | 22.06          | 39.10          | 26.16             | 36.88            | 24.46             | 15.65                                                     | 31.02                           | 34.15                      | 43.59                       | 18.04              | 32.22        | 18.63                               | 27.46                 | 16.95                      | 16.65          | 24.47  | 15.83             | 17.79  | 34.78          | 16.15             | 100.00            | 23.53          | 17.37                               | 50.58             | 20.34           |      |
| Score                   | 1.00           | 1.00           | 1.00              | 1.00             | 1.00              | 1.00                                                      | 1.00                            | 1.00                       | 1.00                        | -0.18              | -0.32        | 0.50                                | 1.00                  | 1.00                       | 1.00           | -0.24  | 1.00              | -0.18  | 1.00           | 1.00              | 1.00              | 1.00           | 0.50                                | 1.00              | 1.00            |      |
| Ion-type                | y <sub>4</sub> | y <sub>5</sub> | y <sup>++10</sup> | y <sub>6</sub>   | b <sup>++11</sup> | y <sup>++12</sup>                                         | y <sup>++13</sup>               | y <sub>7</sub>             | y <sup>++14</sup>           |                    |              | b <sup>++14</sup> -H <sub>2</sub> O | b <sup>++14</sup>     | b <sub>7</sub>             | y <sub>8</sub> |        | y <sup>++17</sup> |        | b <sub>8</sub> | b <sup>++18</sup> | b <sup>++19</sup> | b <sub>9</sub> | b <sup>++20</sup> -H <sub>2</sub> O | b <sup>++20</sup> | b <sub>11</sub> |      |
| Delta Da                | 0.08           | 0.05           | 0.16              | 0.13             | 0.21              | 0.15                                                      | 0.04                            | 0.21                       | 0.28                        |                    |              | 0.31                                | 0.29                  | 0.31                       | 0.11           |        | -0.04             |        | -0.06          | 0.07              | 0.41              | 0.03           | -0.09                               | 0.13              | 0.13            |      |
|                         |                |                |                   |                  |                   |                                                           |                                 |                            |                             |                    |              |                                     |                       |                            |                |        |                   |        |                |                   |                   |                |                                     |                   | y <sub>10</sub> | 0.09 |



# Peak 334

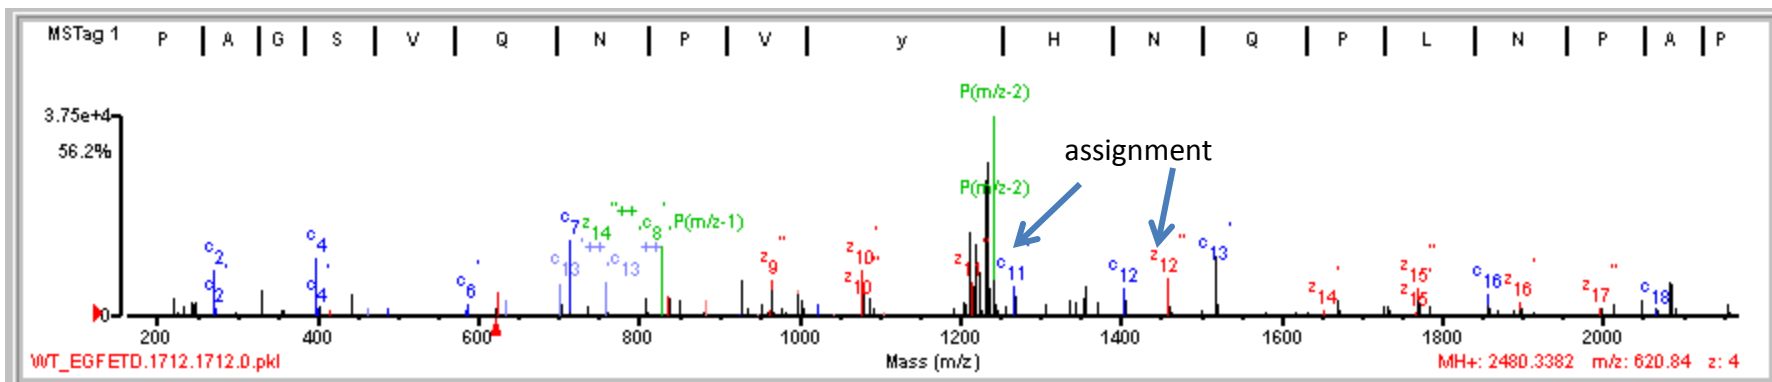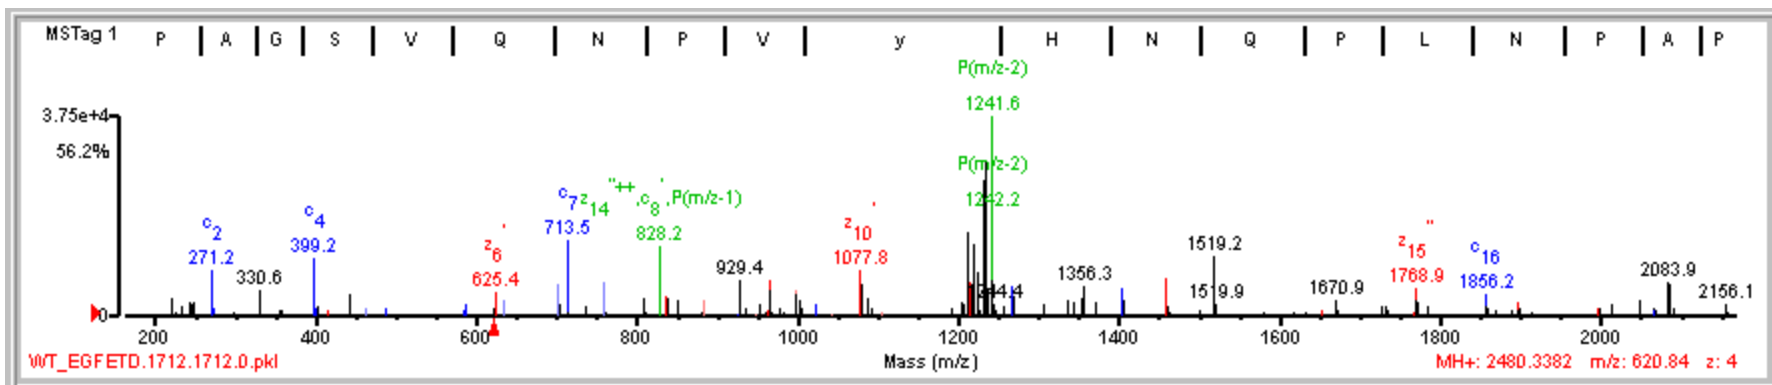

| Rank                    | Score          | SPI (%)        | BCS            | # Unmatched Ions | Variable sites | Sequence                                                           | MH <sup>+</sup> Calculated (Da) | MH <sup>+</sup> Error (Da) | MH <sup>+</sup> Error (ppm) | Protein MW/pl (Da) | Species         | Accession #              | MS-Digest Index #    | Protein Name                               |                 |
|-------------------------|----------------|----------------|----------------|------------------|----------------|--------------------------------------------------------------------|---------------------------------|----------------------------|-----------------------------|--------------------|-----------------|--------------------------|----------------------|--------------------------------------------|-----------------|
| 1                       | 9.72           | 93.2           | 10             | 1/15             | Y1110y         | (K)R P A / G \ S / V Q I N P V / y / H I N Q P L \ N P A P S R (D) | 2399.23                         | 81.1055                    | 459.3                       | 134278.3/6.26      | Homo sapiens    | <a href="#">29725609</a> | <a href="#">2364</a> | epidermal growth factor receptor isoform a |                 |
| Fragment-ion (m/z)      | 271.23         | 399.21         | 702.60         | 713.52           | 759.60         | 964.56                                                             | 998.11                          | 1077.84                    | 1215.94                     | 1267.20            | 1403.91         | 1458.76                  | 1518.44              | 1768.90                                    | 1856.24         |
| Frac. Inten. (% of TIC) | 6.00           | 6.96           | 5.86           | 11.21            | 4.90           | 6.66                                                               | 5.07                            | 9.79                       | 4.64                        | 6.80               | 5.20            | 4.34                     | 12.73                | 5.29                                       | 4.56            |
| Rel. Inten. (% of BP)   | 47.11          | 54.70          | 46.04          | 88.06            | 38.52          | 52.33                                                              | 39.80                           | 76.93                      | 36.43                       | 53.38              | 40.84           | 34.07                    | 100.00               | 41.58                                      | 35.81           |
| Score                   | 1.00           | 1.00           | 1.00           | 1.00             | 1.00           | 0.25                                                               | 1.00                            | 1.00                       | 0.25                        | -0.53              | 1.00            | 0.25                     | 0.25                 | 0.25                                       | 1.00            |
| Ion-type                | c <sub>2</sub> | c <sub>4</sub> | c <sub>7</sub> | c <sub>8</sub>   | c <sub>7</sub> | c <sub>8</sub>                                                     | c <sub>7</sub>                  | c <sub>8</sub>             | c <sub>7</sub>              | c <sub>8</sub>     | c <sub>12</sub> | c <sub>13</sub>          | c <sub>13</sub>      | c <sub>13</sub>                            | c <sub>16</sub> |
| Delta Da                | 0.04           | -0.04          | 0.27           | 0.11             | 0.25           | 0.04                                                               | 0.14                            | -0.17                      | 0.32                        |                    | 0.25            | 0.11                     | -0.27                | 0.08                                       | 0.34            |



# Peak 336

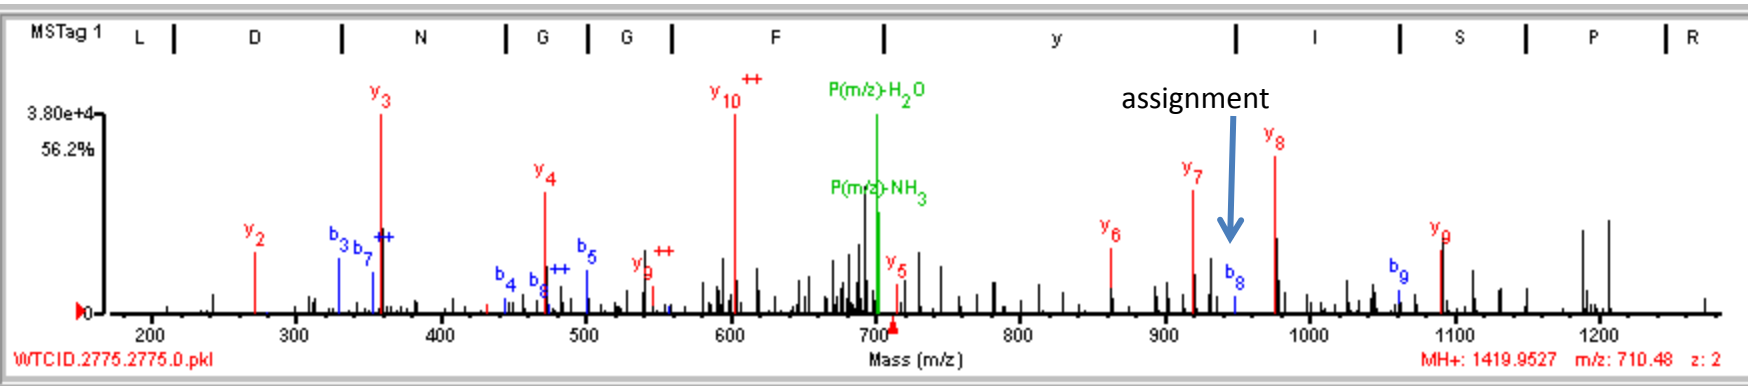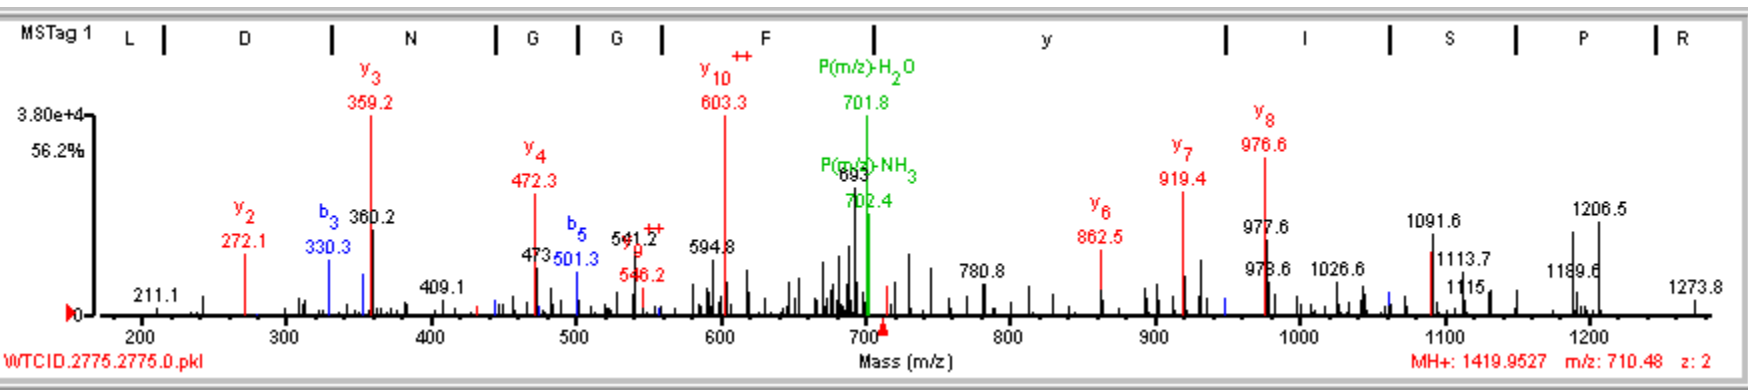

| Rank                    | Score          | SPI (%)        | BCS            | # Unmatched Ions | Variable sites | Sequence                          | MH <sup>+</sup> Calculated (Da)                 | MH <sup>+</sup> Error (Da)    | MH <sup>+</sup> Error (ppm) | Protein MW/pI (Da) | Species      | Accession #                     | MS-Digest Index #    | Protein Name                           |                |                                 |                |         |                                 |                |         |                                  |                                  |         |
|-------------------------|----------------|----------------|----------------|------------------|----------------|-----------------------------------|-------------------------------------------------|-------------------------------|-----------------------------|--------------------|--------------|---------------------------------|----------------------|----------------------------------------|----------------|---------------------------------|----------------|---------|---------------------------------|----------------|---------|----------------------------------|----------------------------------|---------|
| 1                       | 12.30          | 82.6           | 8              | 7/24             | Y209y          | (R) T L/D N/G G/F y I/I/S/P R (S) | 1339.66                                         | 80.2886                       | 227.0                       | 59600.2/6.27       | Homo sapiens | <a href="#">30795229</a>        | <a href="#">9808</a> | hemopoietic cell kinase isoform p61HCK |                |                                 |                |         |                                 |                |         |                                  |                                  |         |
| Fragment-ion (m/z)      | 272.11         | 330.26         | 359.21         | 472.31           | 501.30         | 541.22                            | 594.75                                          | 603.26                        | 617.77                      | 670.28             | 681.70       | 688.46                          | 729.70               | 862.48                                 | 919.40         | 931.39                          | 976.56         | 1026.59 | 1044.50                         | 1090.61        | 1113.69 | 1131.48                          | 1188.60                          | 1206.47 |
| Frac. Inten. (% of TIC) | 2.16           | 2.08           | 14.55          | 6.75             | 2.10           | 2.19                              | 2.78                                            | 8.21                          | 1.80                        | 3.58               | 2.06         | 3.85                            | 2.15                 | 3.77                                   | 6.97           | 3.69                            | 9.71           | 1.77    | 1.81                            | 5.93           | 2.30    | 1.76                             | 4.25                             | 3.74    |
| Rel. Inten. (% of BP)   | 14.81          | 14.33          | 100.00         | 46.41            | 14.45          | 15.08                             | 19.12                                           | 56.40                         | 12.37                       | 24.59              | 14.19        | 26.46                           | 14.77                | 25.90                                  | 47.93          | 25.38                           | 66.74          | 12.16   | 12.47                           | 40.77          | 15.83   | 12.11                            | 29.20                            | 25.72   |
| Score                   | 1.00           | 1.00           | 1.00           | 1.00             | 1.00           | 0.50                              | 0.50                                            | 1.00                          | -0.12                       | -0.25              | -0.14        | 0.50                            | -0.15                | 1.00                                   | 1.00           | 0.50                            | 1.00           | -0.12   | 0.50                            | 1.00           | -0.16   | 0.50                             | 0.50                             | -0.26   |
| Ion-type                | y <sub>2</sub> | b <sub>3</sub> | y <sub>3</sub> | y <sub>4</sub>   | b <sub>5</sub> | b <sub>6</sub> -NH <sub>3</sub>   | y <sup>++</sup> <sub>10</sub> -H <sub>2</sub> O | y <sup>++</sup> <sub>10</sub> |                             |                    |              | b <sub>7</sub> -NH <sub>3</sub> |                      | y <sub>6</sub>                         | y <sub>7</sub> | b <sub>8</sub> -NH <sub>3</sub> | y <sub>8</sub> |         | b <sub>9</sub> -NH <sub>3</sub> | y <sub>9</sub> |         | b <sub>10</sub> -NH <sub>3</sub> | y <sub>10</sub> -NH <sub>3</sub> |         |
| Delta Da                | -0.06          | 0.09           | 0.01           | 0.02             | 0.07           | -0.01                             | 0.50                                            | 0.01                          |                             |                    |              | 0.17                            |                      | 0.09                                   | -0.01          | 0.07                            | 0.13           |         | 0.09                            | 0.14           |         | 0.04                             | 0.13                             |         |

# Peak 337

Ions that verify assignment

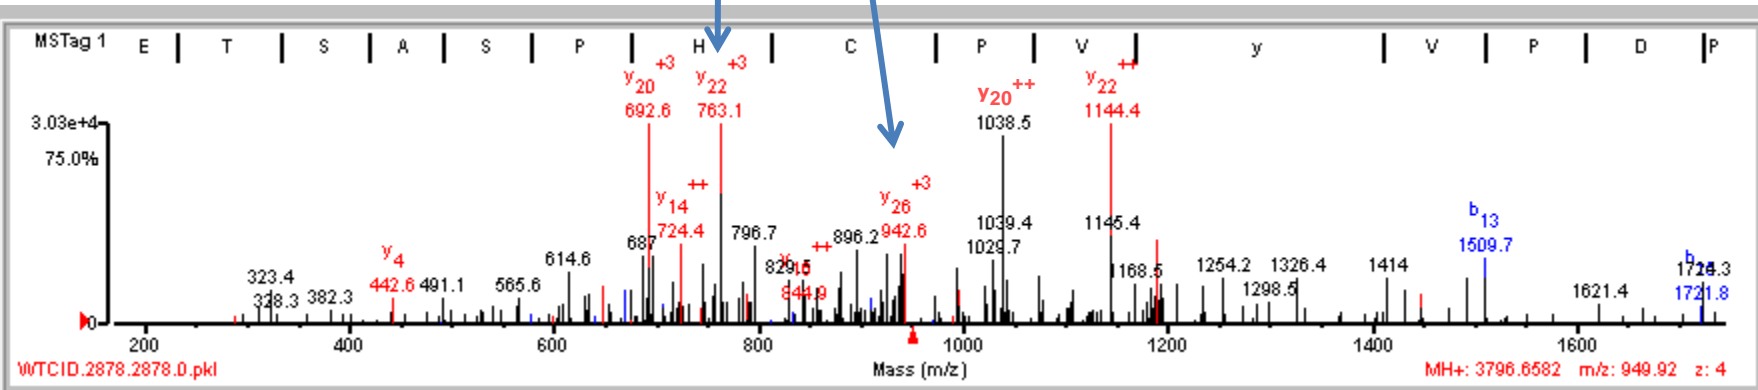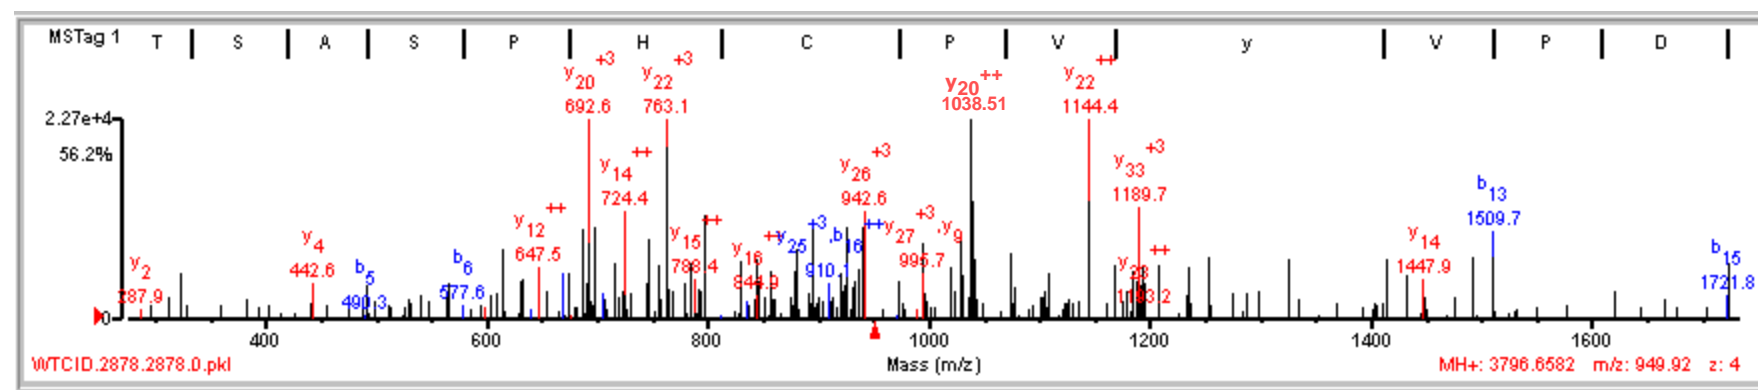

| Rank | Score | SPI (%) | BCS | # Unmatched Ions | Variable sites | Sequence                                                                                    | MH <sup>+</sup> Calculated (Da) | MH <sup>+</sup> Error (Da) | MH <sup>+</sup> Error (ppm) | Protein MW/pl (Da) | Species      | Accession # | MS-Digest Index # | Protein Name                           |
|------|-------|---------|-----|------------------|----------------|---------------------------------------------------------------------------------------------|---------------------------------|----------------------------|-----------------------------|--------------------|--------------|-------------|-------------------|----------------------------------------|
| 1    | 14.20 | 82.6    | 8   | 6/22             | Y51y           | (K) T E / T S A S / P H C / P V y / V P D / P T S / T I K / P G P N S H N S N T P G I R (E) | 3715.78                         | 80.8813                    | 241.0                       | 59600.2/6.27       | Homo sapiens | 30795229    | 9808              | hemopoietic cell kinase isoform p61HCK |

| Fragment-ion (m/z)      | 614.57 | 687.02 | 692.56             | 697.75 | 724.39            | 746.24                               | 755.86            | 763.14             | 796.72             | 844.01 | 896.15            | 926.20 | 936.79 | 942.65 | 994.32 | 1028.97                             | 1038.51           | 1074.32            | 1144.40           | 1189.66            | 1194.11           | 1509.70         |
|-------------------------|--------|--------|--------------------|--------|-------------------|--------------------------------------|-------------------|--------------------|--------------------|--------|-------------------|--------|--------|--------|--------|-------------------------------------|-------------------|--------------------|-------------------|--------------------|-------------------|-----------------|
| Frac. Inten. (% of TIC) | 2.41   | 3.19   | 9.30               | 2.37   | 3.67              | 2.86                                 | 2.38              | 13.42              | 2.97               | 3.17   | 2.90              | 0.07   | 2.49   | 2.76   | 3.82   | 5.33                                | 10.26             | 3.51               | 12.46             | 3.32               | 2.34              | 5.02            |
| Rel. Inten. (% of BP)   | 17.97  | 23.75  | 69.27              | 17.63  | 27.31             | 21.31                                | 17.72             | 100.00             | 22.13              | 23.63  | 21.62             | 0.53   | 18.55  | 20.60  | 28.47  | 39.71                               | 76.42             | 26.17              | 92.82             | 24.70              | 17.42             | 37.38           |
| Score                   | -0.18  | -0.24  | 1.00               | -0.18  | 1.00              | 0.50                                 | 1.00              | 1.00               | 1.00               | -0.24  | 1.00              | 1.50   | -0.19  | 1.00   | -0.28  | 0.50                                | 1.00              | 1.00               | 1.00              | 1.00               | 1.00              | 1.00            |
| Ion-type                |        |        | y+++ <sub>20</sub> |        | y++ <sub>14</sub> | b+++ <sub>13</sub> -H <sub>2</sub> O | b++ <sub>13</sub> | y+++ <sub>22</sub> | y+++ <sub>23</sub> |        | y++ <sub>17</sub> |        |        | sty    |        | y++ <sub>20</sub> -H <sub>2</sub> O | y++ <sub>20</sub> | y+++ <sub>29</sub> | y++ <sub>22</sub> | y+++ <sub>33</sub> | y++ <sub>23</sub> | b <sub>13</sub> |
| Delta Da                |        |        | 0.20               |        | 0.03              | -0.06                                | 0.55              | 0.09               | 0.64               |        | 0.68              |        |        | -0.74  | 1.00   | -0.06                               | 0.47              | 0.48               | 0.33              | 0.44               | 0.50              | 0.09            |

# Peak 338

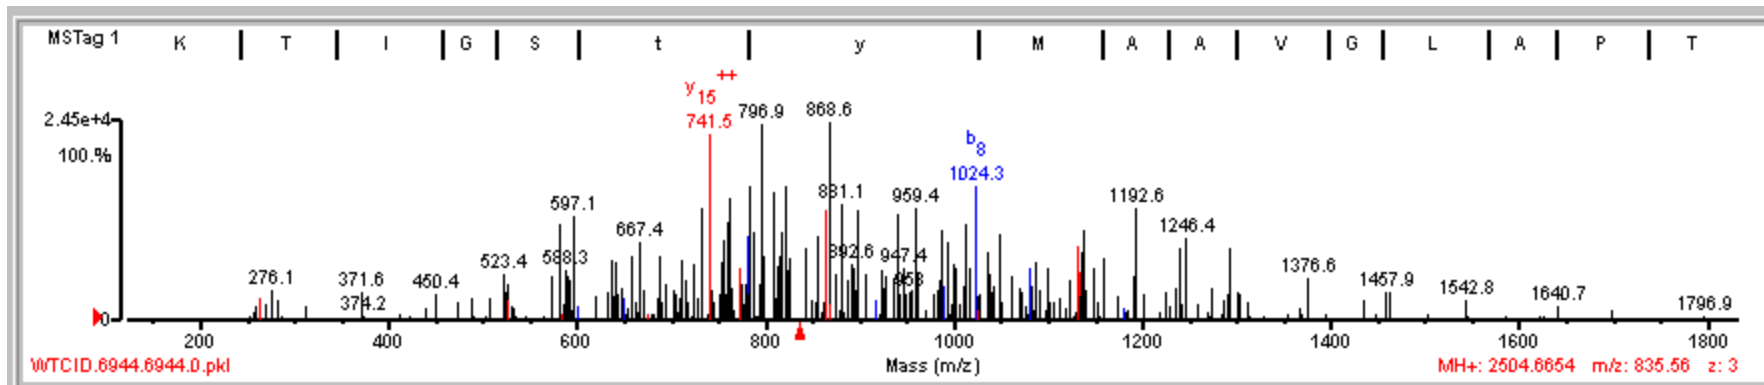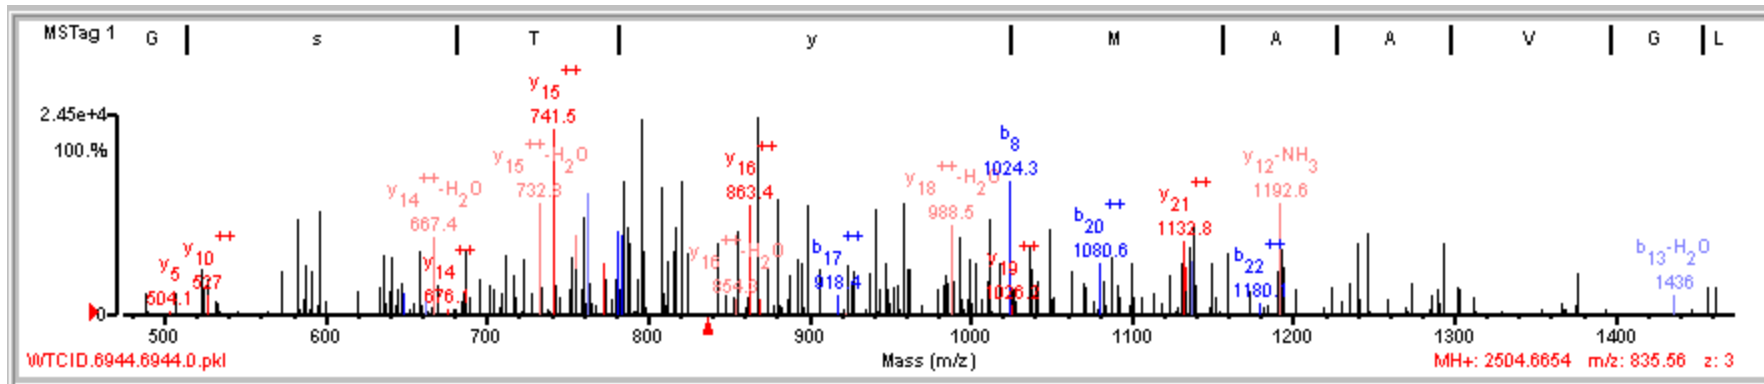

| Rank                    | Score                                           | SPI (%)                       | BCS                             | # Unmatched Ions                 | Variable sites    | Sequence                                                | MH <sup>+</sup> Calculated (Da) | MH <sup>+</sup> Error (Da) | MH <sup>+</sup> Error (ppm) | Protein MW/pI (Da) | Species      | Accession #                   | MS-Digest Index #             | Protein Name              |        |                |        |                                                 |                |                                  |         |                               |         |                                 |                                  |
|-------------------------|-------------------------------------------------|-------------------------------|---------------------------------|----------------------------------|-------------------|---------------------------------------------------------|---------------------------------|----------------------------|-----------------------------|--------------------|--------------|-------------------------------|-------------------------------|---------------------------|--------|----------------|--------|-------------------------------------------------|----------------|----------------------------------|---------|-------------------------------|---------|---------------------------------|----------------------------------|
| 1                       | 8.54                                            | 71.3                          | 6                               | 8/25                             | T938t Y926y S924s | (K) I K/T I G s T y I M A A V G L A/P T S G t K A\K (K) | 2266.25                         | 238.4179                   | -591.3                      | 123440.8/8.77      | Homo sapiens | <a href="#">31083193</a>      | <a href="#">36182</a>         | brain adenylate cyclase 1 |        |                |        |                                                 |                |                                  |         |                               |         |                                 |                                  |
| Fragment-ion (m/z)      | 732.84                                          | 741.47                        | 755.60                          | 763.50                           | 781.61            | 783.71                                                  | 787.87                          | 796.92                     | 808.84                      | 816.44             | 821.65       | 863.45                        | 868.62                        | 881.12                    | 898.89 | 941.17         | 959.45 | 1012.14                                         | 1024.34        | 1037.02                          | 1049.87 | 1132.75                       | 1136.17 | 1138.12                         | 1192.62                          |
| Frac. Inten. (% of TIC) | 3.79                                            | 7.24                          | 3.46                            | 4.72                             | 3.00              | 5.79                                                    | 4.36                            | 0.22                       | 4.38                        | 4.17               | 3.59         | 2.99                          | 5.81                          | 3.70                      | 3.12   | 3.07           | 2.99   | 4.49                                            | 4.59           | 4.22                             | 3.40    | 4.00                          | 3.30    | 3.35                            | 6.23                             |
| Rel. Inten. (% of BP)   | 52.35                                           | 100.00                        | 47.81                           | 65.18                            | 41.46             | 79.91                                                   | 60.27                           | 3.08                       | 60.47                       | 57.63              | 49.62        | 41.31                         | 80.17                         | 51.11                     | 43.10  | 42.34          | 41.33  | 62.04                                           | 63.40          | 58.32                            | 46.97   | 55.22                         | 45.58   | 46.25                           | 86.03                            |
| Score                   | 0.50                                            | 1.00                          | 0.50                            | 0.50                             | 1.00              | 1.00                                                    | 1.00                            | 0.25                       | -0.60                       | -0.58              | -0.50        | 1.00                          | 1.00                          | -0.51                     | -0.43  | 1.00           | -0.41  | 0.25                                            | 1.00           | 0.50                             | -0.47   | 1.00                          | -0.46   | 0.50                            | 0.50                             |
| Ion-type                | y <sup>++</sup> <sub>15</sub> -H <sub>2</sub> O | y <sup>++</sup> <sub>15</sub> | y <sub>7</sub> -NH <sub>3</sub> | b <sub>7</sub> -H <sub>2</sub> O | b <sub>7</sub>    | b <sup>++</sup> <sub>14</sub>                           | b <sup>+++</sup> <sub>22</sub>  | st                         |                             |                    |              | y <sup>++</sup> <sub>16</sub> | b <sup>++</sup> <sub>16</sub> |                           |        | y <sub>9</sub> |        | y <sub>11</sub> -H <sub>3</sub> PO <sub>4</sub> | b <sub>8</sub> | y <sub>10</sub> -NH <sub>3</sub> |         | y <sup>++</sup> <sub>21</sub> |         | b <sub>9</sub> -NH <sub>3</sub> | y <sub>12</sub> -NH <sub>3</sub> |
| Delta Da                | -0.03                                           | -0.40                         | 0.27                            | 0.13                             | 0.22              | -0.15                                                   | 0.52                            | -0.47                      |                             |                    |              | 0.06                          | 0.72                          |                           |        | 0.72           |        | -0.44                                           | -0.08          | 0.51                             |         | -0.24                         |         | -0.31                           | 0.02                             |

# Peak 339

Ions that verify assignment

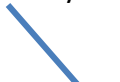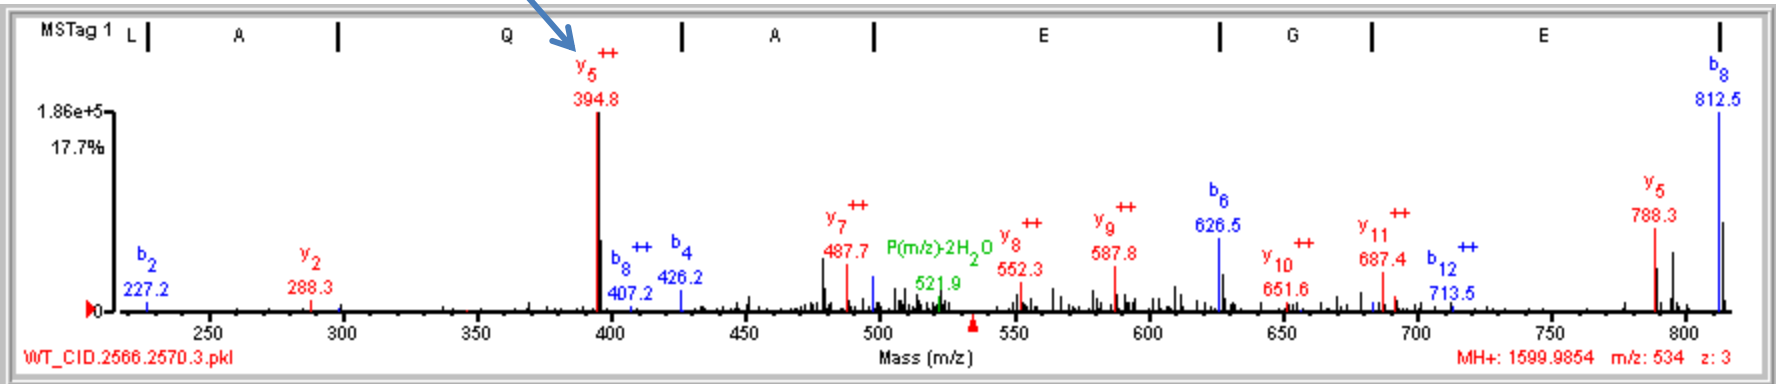

| Rank                    | Score            | SPI (%)        | BCS    | # Unmatched Ions                   | Variable sites   | Sequence                                    | MH <sup>+</sup> Calculated (Da) | MH <sup>+</sup> Error (Da) | MH <sup>+</sup> Error (ppm)     | Protein MW/pi (Da) | Species      | Accession #              | MS-Digest Index #     | Protein Name                       |                  |        |                                 |        |                |                   |                   |                |                |                                 |                |
|-------------------------|------------------|----------------|--------|------------------------------------|------------------|---------------------------------------------|---------------------------------|----------------------------|---------------------------------|--------------------|--------------|--------------------------|-----------------------|------------------------------------|------------------|--------|---------------------------------|--------|----------------|-------------------|-------------------|----------------|----------------|---------------------------------|----------------|
| 1                       | 14.30            | 90.6           | 7      | 8/25                               | Y292y            | (R) L L/A/Q   A   E   G   E   P/C Y I R (D) | 1519.76                         | 80.2281                    | 163.6                           | 133666.7/6.71      | Homo sapiens | <a href="#">31543838</a> | <a href="#">32283</a> | tyrosine kinase 2                  |                  |        |                                 |        |                |                   |                   |                |                |                                 |                |
| Fragment-ion (m/z)      | 394.79           | 426.19         | 474.34 | 478.74                             | 487.71           | 497.31                                      | 505.48                          | 509.20                     | 514.07                          | 523.99             | 549.54       | 552.30                   | 564.17                | 579.36                             | 587.78           | 591.15 | 609.74                          | 611.79 | 626.48         | 651.57            | 687.37            | 691.42         | 788.34         | 795.44                          | 812.47         |
| Frac. Inten. (% of TIC) | 46.57            | 0.88           | 1.19   | 3.45                               | 2.37             | 1.79                                        | 1.97                            | 0.93                       | 1.63                            | 0.89               | 0.98         | 2.06                     | 1.04                  | 1.87                               | 2.27             | 1.42   | 0.86                            | 1.01   | 4.42           | 1.09              | 1.89              | 1.36           | 4.67           | 2.64                            | 10.74          |
| Rel. Inten. (% of BP)   | 100.00           | 1.88           | 2.55   | 7.41                               | 5.10             | 3.84                                        | 4.23                            | 2.00                       | 3.49                            | 1.90               | 2.11         | 4.43                     | 2.23                  | 4.02                               | 4.88             | 3.06   | 1.85                            | 2.16   | 9.48           | 2.35              | 4.05              | 2.93           | 10.03          | 5.68                            | 23.06          |
| Score                   | 1.00             | 1.00           | -0.03  | 0.50                               | 1.00             | 1.00                                        | -0.04                           | -0.02                      | 0.50                            | -0.02              | -0.02        | 1.00                     | -0.02                 | 0.50                               | 1.00             | -0.03  | 0.50                            | -0.02  | 1.00           | 1.00              | 1.00              | 1.00           | 1.00           | 0.50                            | 1.00           |
| Ion-type                | y <sup>++5</sup> | b <sub>4</sub> |        | y <sup>++7</sup> -H <sub>2</sub> O | y <sup>++7</sup> | b <sub>5</sub>                              |                                 |                            | y <sub>3</sub> -NH <sub>3</sub> |                    |              | y <sup>++8</sup>         |                       | y <sup>++9</sup> -H <sub>2</sub> O | y <sup>++9</sup> |        | b <sub>6</sub> -NH <sub>3</sub> |        | b <sub>6</sub> | y <sup>++10</sup> | y <sup>++11</sup> | y <sub>4</sub> | y <sub>5</sub> | b <sub>8</sub> -NH <sub>3</sub> | b <sub>8</sub> |
| Delta Da                | 0.13             | -0.08          |        | 0.05                               | 0.02             | 0.00                                        |                                 |                            | -0.14                           |                    |              | 0.08                     |                       | 0.63                               | 0.05             |        | 0.42                            |        | 0.13           | -0.19             | 0.09              | 0.16           | 0.02           | 0.05                            | 0.06           |

# Peak 340

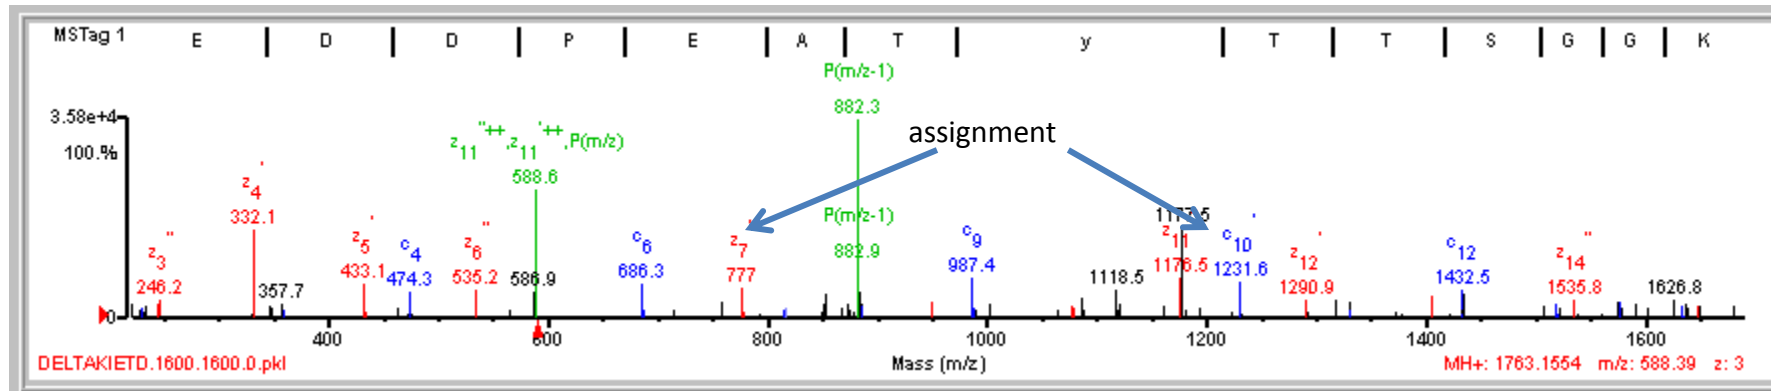

| Rank                    | Score          | SPI (%)        | BCS    | # Unmatched Ions | Variable sites | Sequence                                         | MH <sup>+</sup> Calculated (Da) | MH <sup>+</sup> Error (Da) | MH <sup>+</sup> Error (ppm) | Protein MW/pl (Da) | Species      | Accession #              | MS-Digest Index #     | Protein Name          |                 |                 |                 |         |                 |                 |                 |
|-------------------------|----------------|----------------|--------|------------------|----------------|--------------------------------------------------|---------------------------------|----------------------------|-----------------------------|--------------------|--------------|--------------------------|-----------------------|-----------------------|-----------------|-----------------|-----------------|---------|-----------------|-----------------|-----------------|
| 1                       | 9.93           | 67.9           | 10     | 6/21             | Y772y          | (R)V/L E D I D P E A T   y   T   S / G \ G K (I) | 1682.78                         | 80.3799                    | 234.6                       | 108267.1/5.86      | Homo sapiens | <a href="#">32967311</a> | <a href="#">13835</a> | ephrin receptor EphA2 |                 |                 |                 |         |                 |                 |                 |
| Fragment-ion (m/z)      | 244.80         | 332.13         | 347.67 | 433.12           | 474.27         | 534.37                                           | 686.29                          | 776.98                     | 987.41                      | 1078.09            | 1086.49      | 1118.46                  | 1175.57               | 1177.53               | 1231.65         | 1290.88         | 1432.46         | 1434.63 | 1577.42         | 1633.30         | 1647.87         |
| Frac. Inten. (% of TIC) | 3.82           | 8.71           | 2.86   | 4.19             | 4.39           | 5.15                                             | 4.42                            | 6.38                       | 6.08                        | 2.94               | 4.37         | 5.13                     | 7.04                  | 9.00                  | 3.99            | 3.83            | 4.33            | 3.70    | 3.30            | 2.55            | 3.80            |
| Rel. Inten. (% of BP)   | 42.37          | 96.70          | 31.81  | 46.54            | 48.79          | 57.24                                            | 49.10                           | 70.86                      | 67.54                       | 32.64              | 48.58        | 56.93                    | 78.16                 | 100.00                | 44.36           | 42.53           | 48.12           | 41.11   | 36.61           | 28.27           | 42.24           |
| Score                   | 1.00           | 1.00           | -0.32  | 1.00             | 1.00           | 1.00                                             | 1.00                            | 1.00                       | 1.00                        | 1.00               | -0.49        | -0.57                    | -0.78                 | -1.00                 | 0.25            | 1.00            | 1.00            | -0.41   | 0.25            | 1.00            | 1.00            |
| Ion-type                | z <sub>3</sub> | z <sub>4</sub> |        | z <sub>5</sub>   | c <sub>4</sub> | z <sub>6</sub>                                   | c <sub>6</sub>                  | z <sub>7</sub>             | c <sub>9</sub>              | z <sub>10</sub>    |              |                          |                       |                       | c <sub>10</sub> | z <sub>12</sub> | c <sub>12</sub> |         | c <sub>14</sub> | c <sub>15</sub> | z <sub>15</sub> |
| Delta Da                | -0.34          | -0.04          |        | -0.10            | 0.01           | 0.11                                             | -0.05                           | -0.31                      | -0.05                       | -0.33              |              |                          |                       |                       | 0.15            | 0.38            | -0.13           |         | -0.23           | -0.36           | 0.22            |

# Peak 341

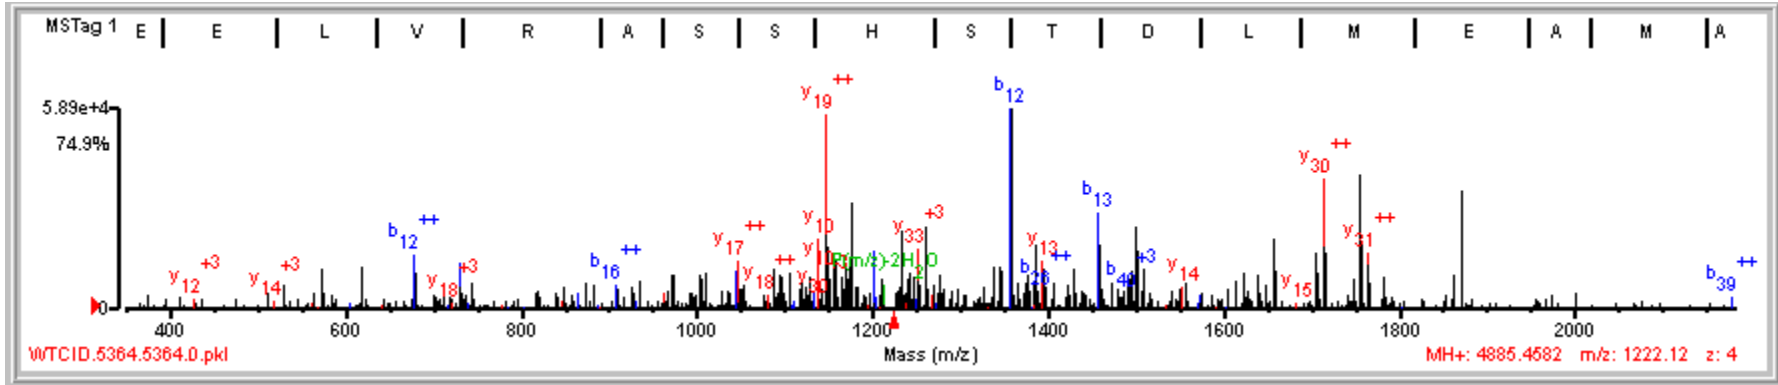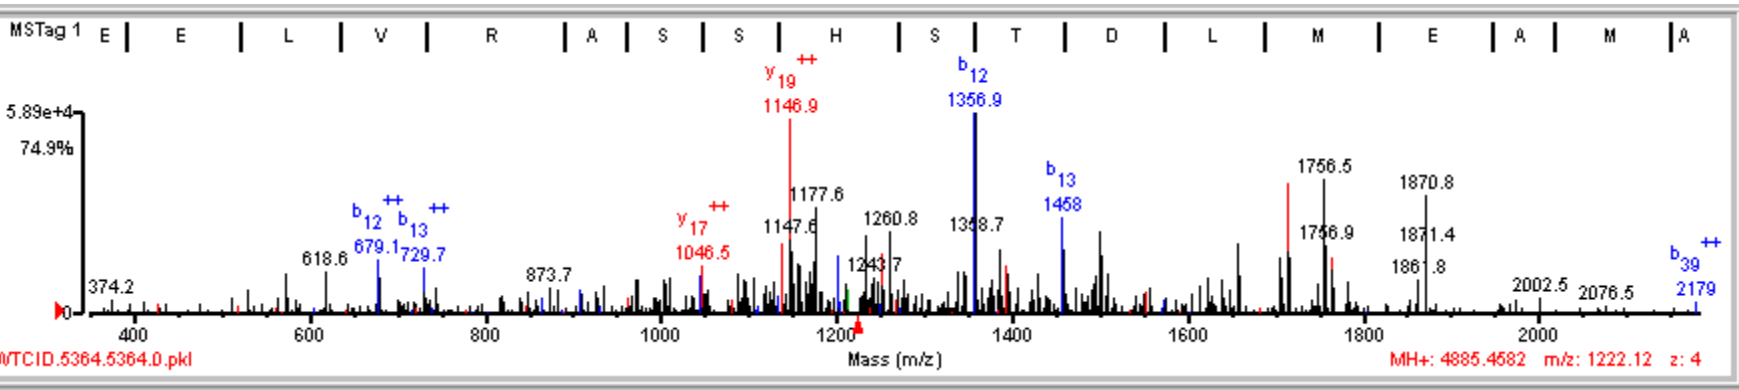

| Rank                    | Score                         | SPI (%)                       | BCS            | # Unmatched Ions               | Variable sites          | Sequence                                                                                                    | MH <sup>+</sup> Calculated (Da) | MH <sup>+</sup> Error (Da)     | MH <sup>+</sup> Error (ppm)    | Protein MW/pi (Da) | Species                           | Accession # | MS-Digest Index # | Protein Name                      |                                |                 |                 |         |         |         |         |                                |                                                  |                                |         |  |
|-------------------------|-------------------------------|-------------------------------|----------------|--------------------------------|-------------------------|-------------------------------------------------------------------------------------------------------------|---------------------------------|--------------------------------|--------------------------------|--------------------|-----------------------------------|-------------|-------------------|-----------------------------------|--------------------------------|-----------------|-----------------|---------|---------|---------|---------|--------------------------------|--------------------------------------------------|--------------------------------|---------|--|
| 1                       | 14.38                         | 74.3                          | 9              | 8/25                           | T432t<br>Y421y<br>S420s | (K) L P E E L V / R A S \ S H S I T D / L M E A M A M G S V E A / s y K C / \ A A / A L I V L t E S G R (S) | 4644.28                         | 241.1765                       | 261.5                          | 58062.4/7.61       | Homo sapiens                      | 33286422    | 17                | pyruvate kinase, muscle isoform 2 |                                |                 |                 |         |         |         |         |                                |                                                  |                                |         |  |
| Fragment-ion (m/z)      | 679.08                        | 729.72                        | 1045.78        | 1105.42                        | 1138.28                 | 1146.89                                                                                                     | 1171.09                         | 1177.60                        | 1202.53                        | 1233.67            | 1251.53                           | 1260.83     | 1356.12           | 1356.94                           | 1385.97                        | 1394.13         | 1458.03         | 1500.75 | 1622.61 | 1658.67 | 1706.31 | 1714.48                        | 1756.47                                          | 1764.76                        | 1870.84 |  |
| Frac. Inten. (% of TIC) | 2.36                          | 1.81                          | 2.20           | 1.83                           | 3.03                    | 9.38                                                                                                        | 2.15                            | 2.79                           | 1.79                           | 2.61               | 3.07                              | 4.36        | 4.46              | 15.84                             | 2.04                           | 2.33            | 5.83            | 4.60    | 1.97    | 2.55    | 2.19    | 6.02                           | 5.96                                             | 3.57                           | 5.29    |  |
| Rel. Inten. (% of BP)   | 14.89                         | 11.45                         | 13.87          | 11.56                          | 19.11                   | 59.22                                                                                                       | 13.56                           | 17.59                          | 11.30                          | 16.46              | 19.36                             | 27.51       | 28.16             | 100.00                            | 12.86                          | 14.71           | 36.79           | 29.04   | 12.41   | 16.08   | 13.80   | 38.02                          | 37.60                                            | 22.51                          | 33.43   |  |
| Score                   | 1.00                          | 1.00                          | 1.00           | 1.00                           | 1.00                    | 1.00                                                                                                        | 1.00                            | 1.00                           | 1.00                           | 1.00               | 0.50                              | -0.28       | 1.00              | 1.00                              | 1.00                           | 1.00            | 1.00            | -0.29   | -0.12   | -0.16   | -0.14   | 1.00                           | 0.50                                             | 1.00                           | -0.33   |  |
| Ion-type                | b <sup>++</sup> <sub>12</sub> | b <sup>++</sup> <sub>13</sub> | b <sub>9</sub> | y <sup>+++</sup> <sub>29</sub> | y <sub>10</sub>         | y <sup>++</sup> <sub>19</sub>                                                                               |                                 | y <sup>+++</sup> <sub>31</sub> | b <sup>+++</sup> <sub>31</sub> |                    | b <sub>11</sub> -H <sub>2</sub> O |             | b <sub>12</sub>   | b <sub>12</sub>                   | y <sup>+++</sup> <sub>37</sub> | y <sub>13</sub> | b <sub>13</sub> |         |         |         |         | y <sup>+++</sup> <sub>30</sub> | y <sup>+++</sup> <sub>31</sub> -H <sub>2</sub> O | y <sup>+++</sup> <sub>31</sub> |         |  |
| Delta Da                | 0.23                          | 0.35                          | 0.21           | 0.61                           | -0.31                   | 0.40                                                                                                        |                                 | 0.76                           | 0.35                           |                    | -0.12                             |             | -0.57             | 0.25                              | 0.70                           | 0.38            | 0.29            |         |         |         |         | 0.25                           | 0.72                                             | 0.01                           |         |  |







# Peak 344

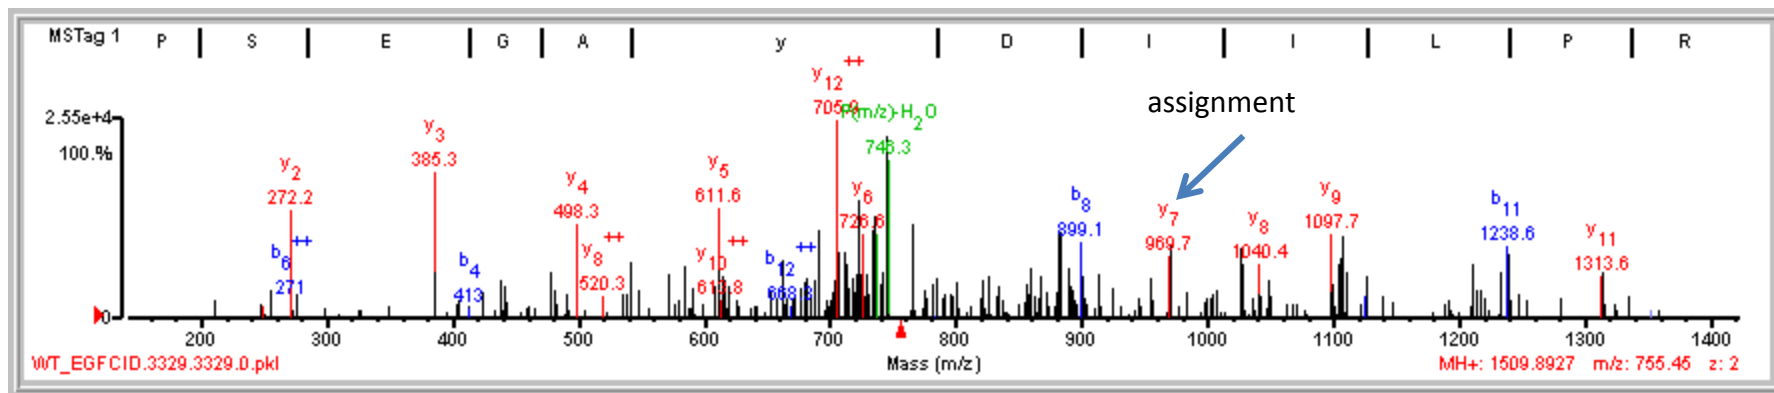

| Rank                   | Score          | SPI (%)        | BCS            | # Unmatched Ions | Variable sites                | Sequence                           | MH* Calculated (Da) | MH* Error (Da) | MH* Error (ppm) | Protein MW/pl (Da) | Species                          | Accession #              | MS-Digest Index #     | Protein Name                                                     |         |                |                 |         |                                   |                 |                 |
|------------------------|----------------|----------------|----------------|------------------|-------------------------------|------------------------------------|---------------------|----------------|-----------------|--------------------|----------------------------------|--------------------------|-----------------------|------------------------------------------------------------------|---------|----------------|-----------------|---------|-----------------------------------|-----------------|-----------------|
| 1                      | 9.70           | 64.7           | 10             | 7/21             | Y399y                         | (K)V/E/S E/G/A/Y/D I/I/L I P R (A) | 1429.77             | 80.1242        | 104.5           | 49388.9/8.72       | Homo sapiens                     | <a href="#">40217833</a> | <a href="#">15834</a> | G protein-coupled receptor family C, group 5, member C isoform b |         |                |                 |         |                                   |                 |                 |
| 1                      | 9.70           | 64.7           | 10             | 7/21             | Y432y                         | (K)V/E/S E/G/A/Y/D I/I/L I P R (A) | 1429.77             | 80.1242        | 104.5           | 52934.8/9.14       | Homo sapiens                     | <a href="#">40217831</a> | <a href="#">25496</a> | G protein-coupled receptor family C, group 5, member C isoform a |         |                |                 |         |                                   |                 |                 |
| Fragment-ion (m/z)     | 272.21         | 385.28         | 498.32         | 611.59           | 705.91                        | 711.84                             | 723.07              | 726.56         | 733.74          | 735.27             | 766.39                           | 889.84                   | 899.09                | 969.67                                                           | 1026.64 | 1040.36        | 1097.74         | 1104.94 | 1107.71                           | 1238.63         | 1313.58         |
| Frac. Inten.(% of TIC) | 4.35           | 7.16           | 3.55           | 7.08             | 0.29                          | 5.66                               | 7.35                | 3.99           | 4.74            | 3.35               | 3.82                             | 3.63                     | 5.73                  | 5.99                                                             | 5.34    | 3.80           | 5.85            | 5.21    | 3.35                              | 5.86            | 3.91            |
| Rel. Inten.(% of BP)   | 59.17          | 97.34          | 48.23          | 96.26            | 4.01                          | 76.94                              | 100.00              | 54.21          | 64.53           | 45.55              | 51.98                            | 49.31                    | 77.98                 | 81.50                                                            | 72.58   | 51.68          | 79.59           | 70.85   | 45.52                             | 79.67           | 53.25           |
| Score                  | 1.00           | 1.00           | 1.00           | 1.00             | 1.50                          | -0.77                              | -1.00               | 1.00           | -0.65           | -0.46              | 0.50                             | -0.49                    | 1.00                  | 1.00                                                             | -0.73   | 1.00           | 1.00            | -0.71   | 0.50                              | 1.00            | 1.00            |
| Ion-type               | y <sub>2</sub> | a <sub>4</sub> | y <sub>4</sub> | y <sub>5</sub>   | y <sub>++</sub> <sub>12</sub> |                                    |                     | y <sub>6</sub> |                 |                    | b <sub>7</sub> -H <sub>2</sub> O |                          | b <sub>8</sub>        | y <sub>7</sub>                                                   |         | y <sub>8</sub> | a <sub>10</sub> |         | b <sub>10</sub> -H <sub>2</sub> O | b <sub>11</sub> | y <sub>11</sub> |
| Delta Da               | 0.04           | 0.07           | -0.02          | 0.17             |                               |                                    |                     | 0.11           |                 |                    | 0.11                             |                          | -0.23                 | 0.19                                                             |         | -0.16          | 0.25            |         | 0.23                              | 0.06            | -0.03           |
|                        |                | y <sub>3</sub> |                |                  | 1.50                          |                                    |                     |                |                 |                    |                                  |                          |                       |                                                                  |         |                | y <sub>9</sub>  |         |                                   |                 |                 |
|                        |                | 0.02           |                |                  | -0.47                         |                                    |                     |                |                 |                    |                                  |                          |                       |                                                                  |         |                | 0.20            |         |                                   |                 |                 |

# Peak 345

assignment

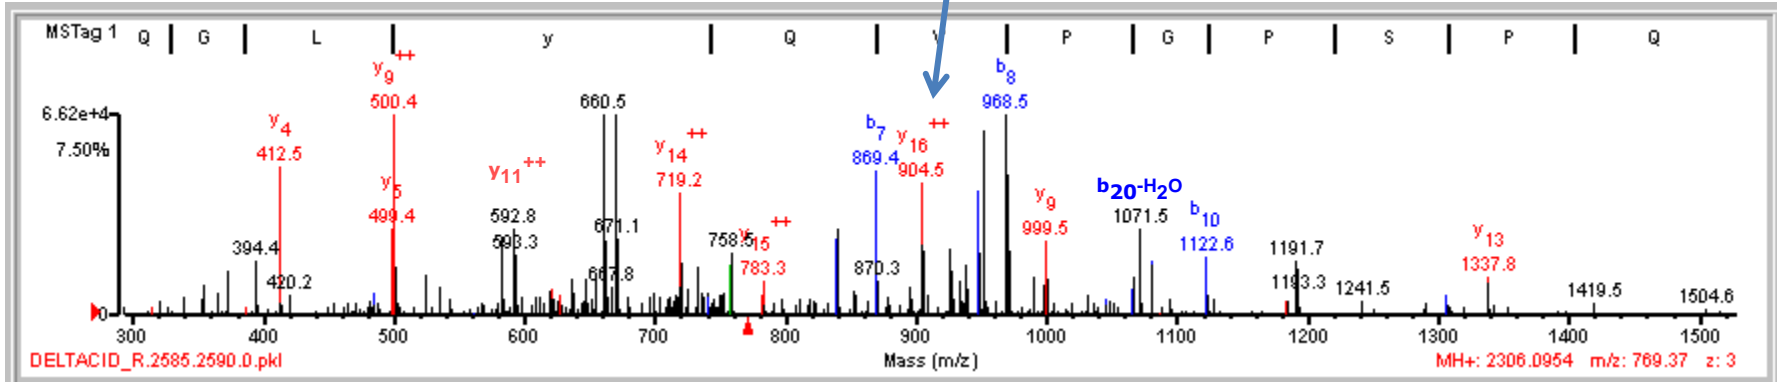

| Rank | Score | SPI (%) | BCS | # Unmatched Ions | Variable sites | Sequence                                                    | MH* Calculated (Da) | MH* Error (Da) | MH* Error (ppm) | Protein MW/pl (Da) | Species      | Accession #               | MS-Digest Index #     | Protein Name                                                   |
|------|-------|---------|-----|------------------|----------------|-------------------------------------------------------------|---------------------|----------------|-----------------|--------------------|--------------|---------------------------|-----------------------|----------------------------------------------------------------|
| 1    | 20.20 | 97.8    | 11  | 2/25             | Y128y          | (K) A Q Q/G L I y Q I V I P G I P S/P Q F Q S I P P A K (Q) | 2225.13             | 80.9605        | 431.1           | 93372.3/5.41       | Homo sapiens | <a href="#">44662836</a>  | <a href="#">2165</a>  | breast cancer anti-estrogen resistance 1                       |
| 1    | 20.20 | 97.8    | 11  | 2/25             | Y171y          | (K) A Q Q/G L I y Q I V I P G I P S/P Q F Q S I P P A K (Q) | 2225.13             | 80.9605        | 431.1           | 43292.4/8.67       | Homo sapiens | <a href="#">89037955</a>  | <a href="#">22653</a> | PREDICTED: similar to breast cancer anti-estrogen resistance 1 |
| 1    | 20.20 | 97.8    | 11  | 2/25             | Y171y          | (K) A Q Q/G L I y Q I V I P G I P S/P Q F Q S I P P A K (Q) | 2225.13             | 80.9605        | 431.1           | 45780.1/9.04       | Homo sapiens | <a href="#">169208443</a> | <a href="#">23945</a> | PREDICTED: similar to breast cancer anti-estrogen resistance 1 |
| 1    | 20.20 | 97.8    | 11  | 2/25             | Y171y          | (K) A Q Q/G L I y Q I V I P G I P S/P Q F Q S I P P A K (Q) | 2225.13             | 80.9605        | 431.1           | 28095.9/8.96       | Homo sapiens | <a href="#">169209372</a> | <a href="#">31013</a> | PREDICTED: similar to breast cancer anti-estrogen resistance 1 |
| 1    | 20.20 | 97.8    | 11  | 2/25             | Y171y          | (K) A Q Q/G L I y Q I V I P G I P S/P Q F Q S I P P A K (Q) | 2225.13             | 80.9605        | 431.1           | 28969.0/8.96       | Homo sapiens | <a href="#">169208537</a> | <a href="#">33379</a> | PREDICTED: similar to breast cancer anti-estrogen resistance 1 |

  

| Fragment-ion (m/z)     | 412.48         | 498.34         | 500.35                       | 583.51                                          | 592.44                        | 660.54                                          | 669.63                        | 719.22                        | 732.74 | 839.50                        | 869.35         | 904.49                        | 926.68 | 938.45                                          | 947.51                        | 951.53                          | 968.52         | 989.74                        | 999.53         | 1065.78 | 1071.48                                         | 1080.23                       | 1122.58         | 1191.68         | 1337.82         |
|------------------------|----------------|----------------|------------------------------|-------------------------------------------------|-------------------------------|-------------------------------------------------|-------------------------------|-------------------------------|--------|-------------------------------|----------------|-------------------------------|--------|-------------------------------------------------|-------------------------------|---------------------------------|----------------|-------------------------------|----------------|---------|-------------------------------------------------|-------------------------------|-----------------|-----------------|-----------------|
| Frac. Inten.(% of TIC) | 1.75           | 1.46           | 3.28                         | 1.11                                            | 2.31                          | 4.11                                            | 42.36                         | 2.09                          | 0.81   | 1.75                          | 2.00           | 2.97                          | 1.42   | 0.88                                            | 2.26                          | 3.44                            | 17.26          | 0.89                          | 1.32           | 0.75    | 1.02                                            | 1.55                          | 1.03            | 1.33            | 0.82            |
| Rel. Inten.(% of BP)   | 4.13           | 3.45           | 7.75                         | 2.62                                            | 5.46                          | 9.71                                            | 100.00                        | 4.93                          | 1.92   | 4.12                          | 4.73           | 7.01                          | 3.36   | 2.08                                            | 5.34                          | 8.12                            | 40.75          | 2.11                          | 3.11           | 1.77    | 2.42                                            | 3.67                          | 2.43            | 3.13            | 1.95            |
| Score                  | 1.00           | 1.00           | 1.00                         | 0.50                                            | 1.00                          | 1.00                                            | 1.00                          | 1.00                          | -0.02  | 1.00                          | 1.00           | 1.00                          | -0.03  | 0.50                                            | 1.00                          | 0.50                            | 1.00           | 1.00                          | 1.00           | 1.00    | 1.00                                            | 1.00                          | 1.00            | 0.25            | 1.00            |
| Ion-type               | y <sub>4</sub> | b <sub>5</sub> | y <sup>++</sup> <sub>9</sub> | y <sup>++</sup> <sub>11</sub> -H <sub>2</sub> O | y <sup>++</sup> <sub>11</sub> | y <sup>++</sup> <sub>13</sub> -H <sub>2</sub> O | y <sup>++</sup> <sub>13</sub> | y <sup>++</sup> <sub>14</sub> |        | b <sup>++</sup> <sub>15</sub> | b <sub>7</sub> | b <sup>++</sup> <sub>16</sub> |        | b <sup>++</sup> <sub>17</sub> -H <sub>2</sub> O | b <sup>++</sup> <sub>17</sub> | b <sub>8</sub> -NH <sub>3</sub> | b <sub>8</sub> | y <sup>++</sup> <sub>18</sub> | y <sub>9</sub> |         | b <sup>++</sup> <sub>20</sub> -H <sub>2</sub> O | b <sup>++</sup> <sub>20</sub> | b <sub>10</sub> | a <sub>11</sub> | y <sub>13</sub> |
| Delta Da               | 0.22           | 0.07           | 0.08                         | 0.21                                            | 0.13                          | 0.20                                            | 0.28                          | 0.34                          |        | -0.38                         | -0.01          | 0.58                          |        | 0.03                                            | 0.08                          | 0.13                            | 0.10           | 0.26                          | 0.00           | 0.30    | 0.48                                            | 0.23                          | 0.08            | 0.12            | 0.14            |

# Peak 346

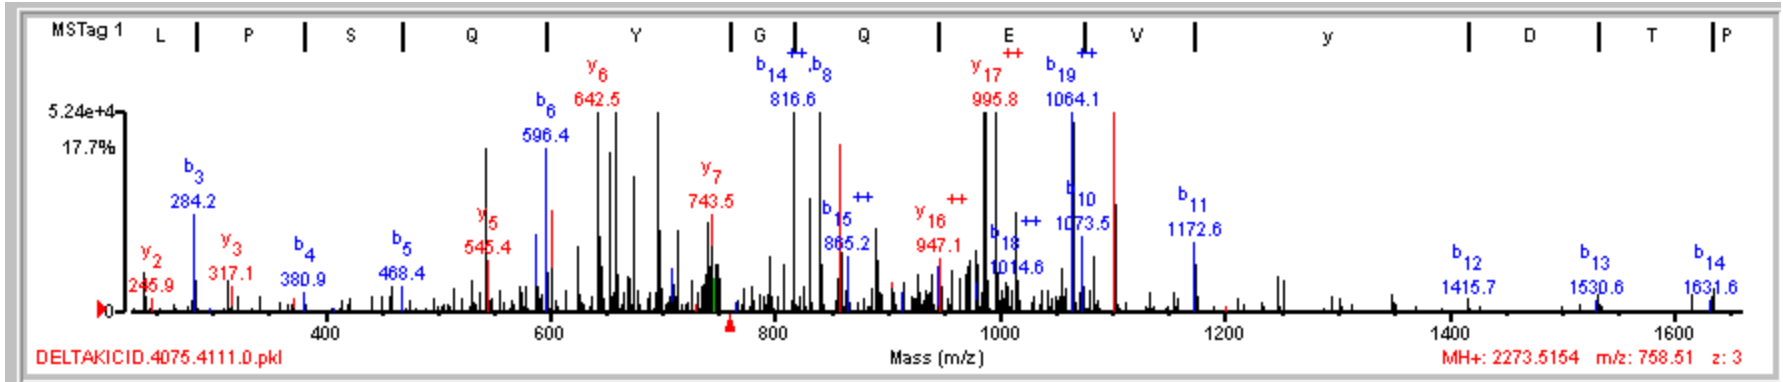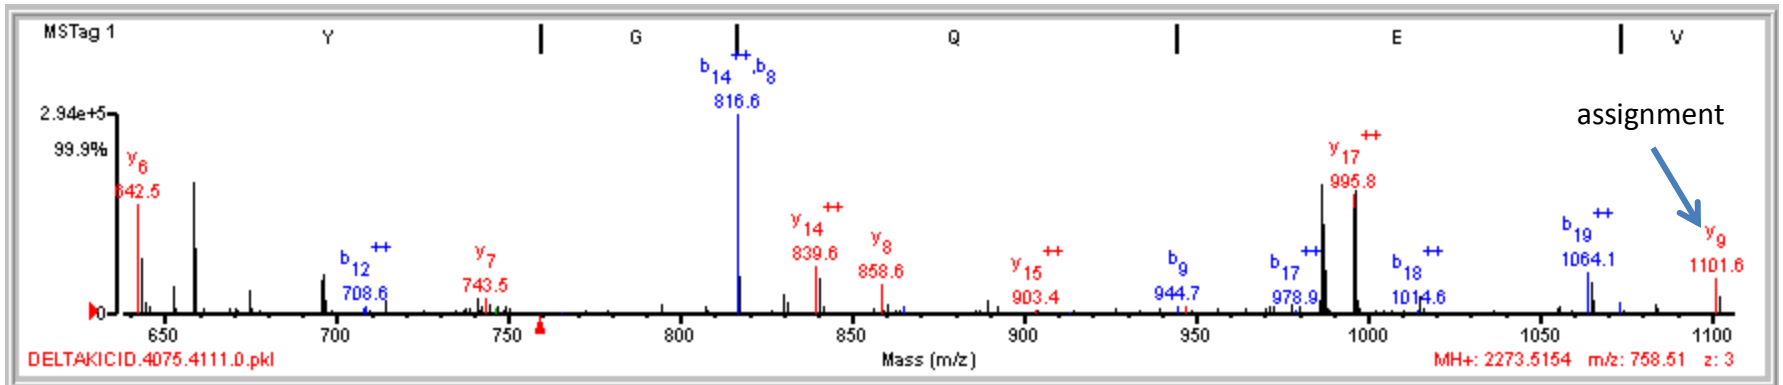

| Rank                    | Score          | SPI (%)                       | BCS            | # Unmatched Ions              | Variable sites                  | Sequence                                                          | MH <sup>+</sup> Calculated (Da) | MH <sup>+</sup> Error (Da) | MH <sup>+</sup> Error (ppm) | Protein MW/pl (Da)               | Species        | Accession #              | MS-Digest Index #                               | Protein Name                             |                |                                                 |                               |                               |                               |                               |                               |                 |                |                 |         |
|-------------------------|----------------|-------------------------------|----------------|-------------------------------|---------------------------------|-------------------------------------------------------------------|---------------------------------|----------------------------|-----------------------------|----------------------------------|----------------|--------------------------|-------------------------------------------------|------------------------------------------|----------------|-------------------------------------------------|-------------------------------|-------------------------------|-------------------------------|-------------------------------|-------------------------------|-----------------|----------------|-----------------|---------|
| 1                       | 16.62          | 81.5                          | 10             | 5/25                          | Y267y                           | (R) G L L I P S Q I Y G \ Q E I V I Y / D / T I P P M A \ V R (G) | 2193.09                         | 80.4258                    | 202.1                       | 93372.3/5.41                     | Homo sapiens   | <a href="#">44662836</a> | <a href="#">2165</a>                            | breast cancer anti-estrogen resistance 1 |                |                                                 |                               |                               |                               |                               |                               |                 |                |                 |         |
| Fragment-ion (m/z)      | 284.24         | 542.29                        | 586.87         | 596.38                        | 601.16                          | 624.57                                                            | 642.46                          | 652.55                     | 658.22                      | 674.98                           | 695.98         | 741.26                   | 743.46                                          | 816.61                                   | 830.40         | 839.64                                          | 858.56                        | 986.70                        | 995.76                        | 996.11                        | 1014.97                       | 1064.10         | 1073.51        | 1101.59         | 1172.59 |
| Frac. Inten. (% of TIC) | 1.13           | 1.75                          | 1.40           | 1.71                          | 1.38                            | 1.00                                                              | 9.10                            | 1.67                       | 9.41                        | 1.45                             | 4.23           | 1.35                     | 1.38                                            | 12.85                                    | 1.85           | 4.46                                            | 1.64                          | 13.40                         | 5.64                          | 11.99                         | 1.36                          | 4.66            | 1.02           | 2.83            | 1.34    |
| Rel. Inten. (% of BP)   | 8.42           | 13.02                         | 10.43          | 12.73                         | 10.31                           | 7.49                                                              | 67.85                           | 12.46                      | 70.20                       | 10.84                            | 31.58          | 10.11                    | 10.27                                           | 95.86                                    | 13.78          | 33.30                                           | 12.22                         | 100.00                        | 42.08                         | 89.45                         | 10.17                         | 34.77           | 7.64           | 21.09           | 9.96    |
| Score                   | 1.00           | -0.13                         | 1.00           | 1.00                          | 1.00                            | 0.50                                                              | 1.00                            | -0.12                      | -0.70                       | -0.11                            | -0.32          | 0.50                     | 1.00                                            | 1.00                                     | 0.50           | 1.00                                            | 1.00                          | 0.50                          | 1.00                          | 1.00                          | 1.00                          | 1.00            | 1.00           | 1.00            | 1.00    |
| Ion-type                | b <sub>3</sub> | b <sup>++</sup> <sub>11</sub> | b <sub>6</sub> | y <sup>++</sup> <sub>10</sub> | y <sub>6</sub> -NH <sub>3</sub> | y <sub>6</sub>                                                    | y <sub>6</sub>                  | y <sub>6</sub>             | y <sub>6</sub>              | b <sub>7</sub> -H <sub>2</sub> O | y <sub>7</sub> | b <sub>8</sub>           | y <sup>++</sup> <sub>14</sub> -H <sub>2</sub> O | y <sup>++</sup> <sub>14</sub>            | y <sub>8</sub> | y <sup>++</sup> <sub>17</sub> -H <sub>2</sub> O | y <sup>++</sup> <sub>17</sub> | y <sup>++</sup> <sub>17</sub> | y <sup>++</sup> <sub>17</sub> | b <sup>++</sup> <sub>18</sub> | b <sup>++</sup> <sub>19</sub> | b <sub>10</sub> | y <sub>9</sub> | b <sub>11</sub> |         |
| Delta Da                | 0.04           | 0.07                          | 0.04           | 0.39                          | -0.77                           | 0.10                                                              |                                 |                            |                             | -0.13                            | 0.05           | 0.18                     | 0.04                                            | 0.27                                     | 0.12           | 0.27                                            | 0.32                          | 0.67                          | 0.53                          | 0.12                          | -0.02                         | 0.12            | -0.00          |                 |         |



# Peak 348

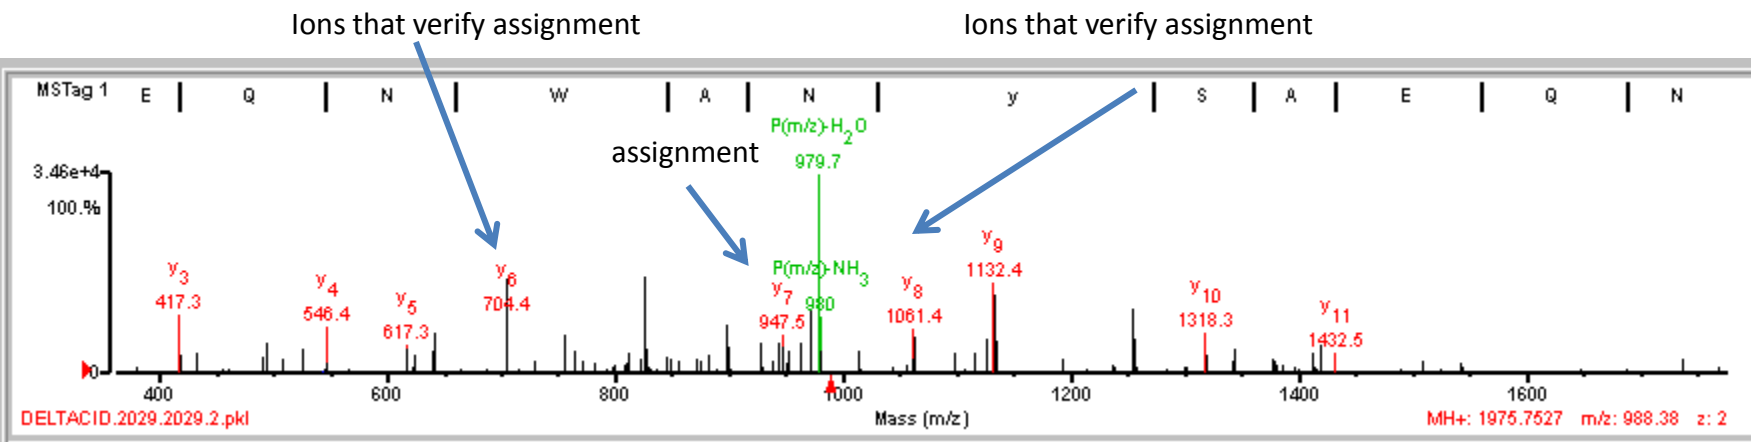

| Rank | Score | SPI (%) | BCS | # Unmatched Ions | Variable sites | Sequence                                | MH <sup>+</sup> Calculated (Da) | MH <sup>+</sup> Error (Da) | MH <sup>+</sup> Error (ppm) | Protein MW/pl (Da) | Species      | Accession #             | MS-Digest Index #     | Protein Name |
|------|-------|---------|-----|------------------|----------------|-----------------------------------------|---------------------------------|----------------------------|-----------------------------|--------------------|--------------|-------------------------|-----------------------|--------------|
| 1    | 9.64  | 93.8    | 8   | 1/13             | Y313y          | (K) Q A S E Q N/W/A/N/Y/S/A/E/Q N R (M) | 1895.83                         | 79.9260                    | -20.4                       | 43008.6/8.96       | Homo sapiens | <a href="#">4504001</a> | <a href="#">26501</a> | connexin 43  |

| Fragment-ion (m/z)      | 417.28         | 546.43         | 617.30         | 641.31                          | 704.38         | 827.27                          | 898.34                          | 947.48         | 972.16 | 1061.41        | 1132.44        | 1255.62                          | 1318.33         |
|-------------------------|----------------|----------------|----------------|---------------------------------|----------------|---------------------------------|---------------------------------|----------------|--------|----------------|----------------|----------------------------------|-----------------|
| Frac. Inten. (% of TIC) | 6.47           | 4.89           | 4.69           | 4.99                            | 12.69          | 10.70                           | 7.25                            | 5.43           | 6.23   | 4.92           | 17.42          | 9.30                             | 5.02            |
| Rel. Inten. (% of BP)   | 37.15          | 28.08          | 26.95          | 28.63                           | 72.85          | 61.44                           | 41.63                           | 31.16          | 35.78  | 28.23          | 100.00         | 53.41                            | 28.85           |
| Score                   | 1.00           | 1.00           | 1.00           | 0.50                            | 1.00           | 0.50                            | 0.50                            | 1.00           | -0.36  | 1.00           | 1.00           | 0.50                             | 1.00            |
| Ion-type                | y <sub>3</sub> | y <sub>4</sub> | y <sub>5</sub> | b <sub>6</sub> -NH <sub>3</sub> | y <sub>6</sub> | b <sub>7</sub> -NH <sub>3</sub> | b <sub>8</sub> -NH <sub>3</sub> | y <sub>7</sub> |        | y <sub>8</sub> | y <sub>9</sub> | b <sub>10</sub> -NH <sub>3</sub> | y <sub>10</sub> |
| Delta Da                | 0.06           | 0.17           | -0.00          | 0.06                            | 0.05           | -0.06                           | -0.03                           | 0.12           |        | 0.01           | -0.00          | 0.18                             | -0.19           |





# Peak 350

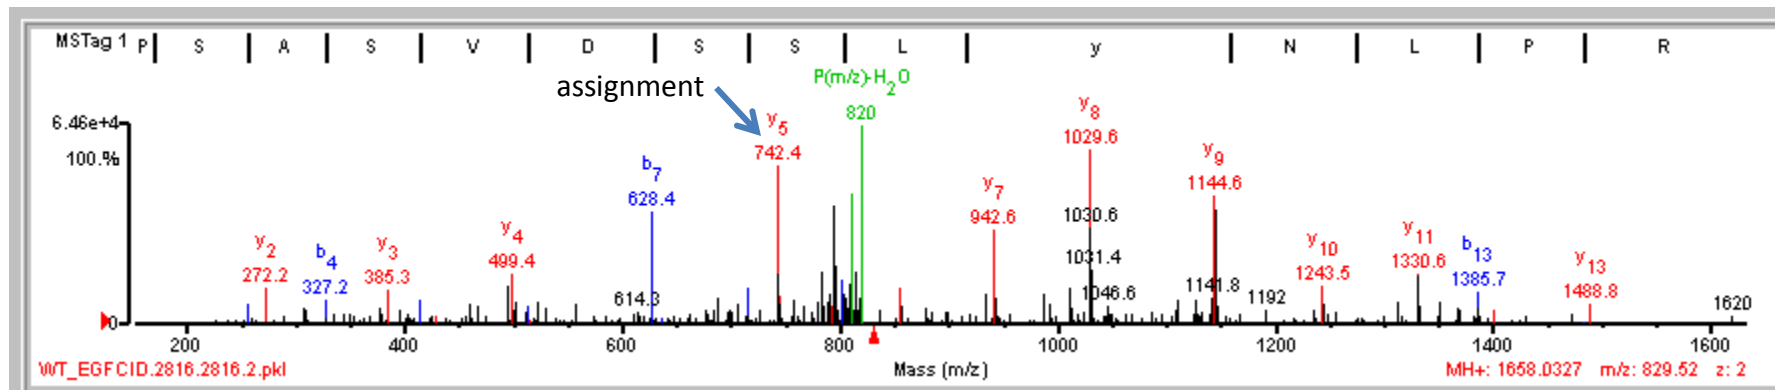

| Rank | Score | SPI (%) | BCS | # Unmatched Ions | Variable sites | Sequence                                        | MH <sup>+</sup> Calculated (Da) | MH <sup>+</sup> Error (Da) | MH <sup>+</sup> Error (ppm) | Protein MW/pi (Da) | Species      | Accession #              | MS-Digest Index #     | Protein Name                                |
|------|-------|---------|-----|------------------|----------------|-------------------------------------------------|---------------------------------|----------------------------|-----------------------------|--------------------|--------------|--------------------------|-----------------------|---------------------------------------------|
| 1    | 15.12 | 80.3    | 9   | 7/25             | Y259y          | (R) A P S A/S/V/D   S   S   L   y/N L   P\R (S) | 1576.80                         | 81.2362                    | 765.9                       | 80005.5/5.95       | Homo sapiens | <a href="#">46370071</a> | <a href="#">10706</a> | GRB2-associated binding protein 1 isoform a |
| 1    | 15.12 | 80.3    | 9   | 7/25             | Y259y          | (R) A P S A/S/V/D   S   S   L   y/N L   P\R (S) | 1576.80                         | 81.2362                    | 765.9                       | 76616.7/5.63       | Homo sapiens | <a href="#">46370073</a> | <a href="#">25875</a> | GRB2-associated binding protein 1 isoform b |

  

| Fragment-ion (m/z)      | 272.19         | 378.13         | 495.31                           | 499.41         | 628.39         | 715.13         | 742.36            | 780.13 | 784.31                           | 794.60 | 796.99 | 802.09         | 805.78 | 815.43 | 855.58         | 933.96 | 942.58         | 1011.66                         | 1029.57        | 1126.68                         | 1144.58        | 1243.52         | 1330.63         | 1350.93 | 1385.72         |
|-------------------------|----------------|----------------|----------------------------------|----------------|----------------|----------------|-------------------|--------|----------------------------------|--------|--------|----------------|--------|--------|----------------|--------|----------------|---------------------------------|----------------|---------------------------------|----------------|-----------------|-----------------|---------|-----------------|
| Frac. Inten. (% of TIC) | 1.64           | 1.88           | 1.85                             | 2.92           | 5.25           | 2.17           | 10.78             | 0.05   | 2.37                             | 6.26   | 2.65   | 3.16           | 1.77   | 2.89   | 2.87           | 2.55   | 5.73           | 2.58                            | 14.24          | 2.24                            | 11.32          | 3.31            | 5.12            | 1.67    | 2.74            |
| Rel. Inten. (% of BP)   | 11.53          | 13.22          | 12.98                            | 20.52          | 36.90          | 15.23          | 75.67             | 0.33   | 16.62                            | 43.97  | 18.61  | 22.16          | 12.45  | 20.33  | 20.16          | 17.89  | 40.21          | 18.14                           | 100.00         | 15.71                           | 79.51          | 23.24           | 35.95           | 11.71   | 19.21           |
| Score                   | 1.00           | -0.13          | 0.50                             | 1.00           | 1.00           | 1.00           | 1.00              | 1.50   | 0.50                             | -0.44  | -0.19  | 1.00           | -0.12  | -0.20  | 1.00           | -0.18  | 1.00           | 0.50                            | 1.00           | 0.50                            | 1.00           | 1.00            | 1.00            | -0.12   | 1.00            |
| Ion-type                | y <sub>2</sub> | b <sub>4</sub> | b <sub>6</sub> -H <sub>2</sub> O | y <sub>4</sub> | b <sub>7</sub> | b <sub>8</sub> | b <sub>++14</sub> | sty    | b <sub>9</sub> -H <sub>2</sub> O |        |        | b <sub>9</sub> |        |        | y <sub>8</sub> |        | y <sub>7</sub> | y <sub>8</sub> -NH <sub>3</sub> | y <sub>8</sub> | y <sub>9</sub> -NH <sub>3</sub> | y <sub>9</sub> | y <sub>10</sub> | y <sub>11</sub> |         | b <sub>13</sub> |
| Delta Da                | 0.02           |                | 0.05                             | 0.11           | 0.10           | -0.20          | 0.53              | 0.23   | -0.04                            |        |        | -0.27          |        |        | 0.17           |        | 0.14           | -0.79                           | 0.09           | -0.80                           | 0.08           | -0.05           | 0.03            |         | 0.12            |

# Peak 351

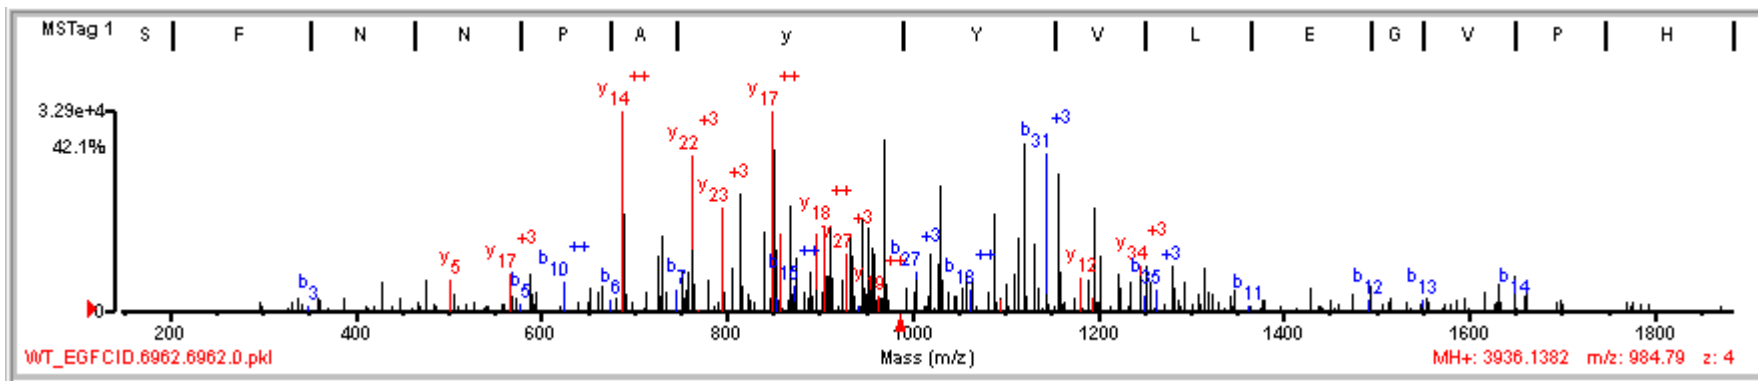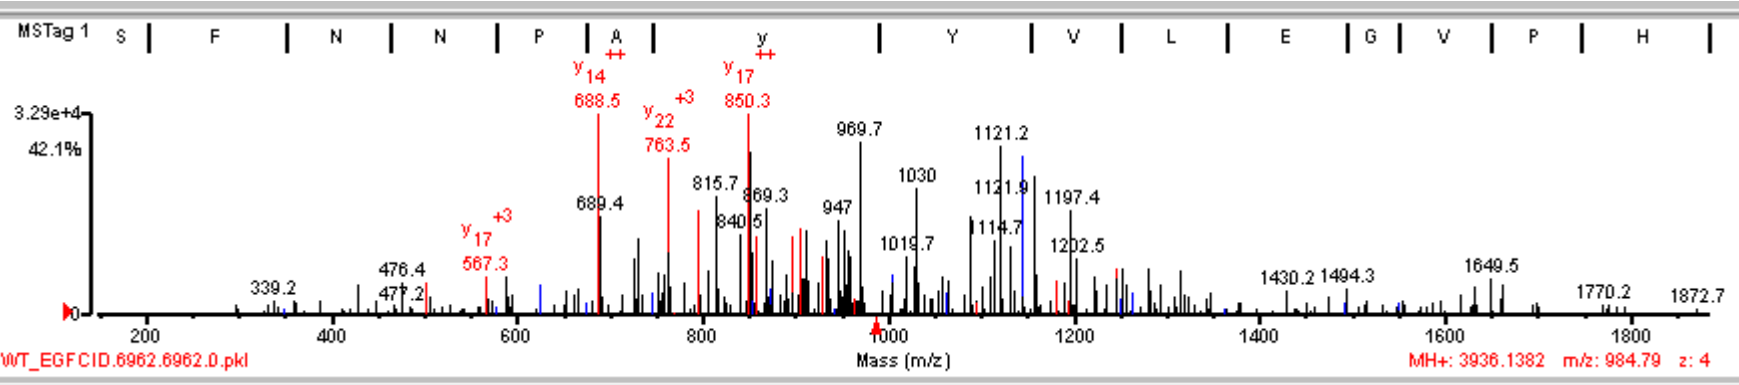

| Rank                   | Score             | SPI (%)            | BCS                | # Unmatched Ions   | Variable sites                      | Sequence                                                                                      | MH <sup>+</sup> Calculated (Da) | MH <sup>+</sup> Error (Da) | MH <sup>+</sup> Error (ppm) | Protein MW/pi (Da) | Species      | Accession #             | MS-Digest Index #     | Protein Name                              |         |         |         |                    |                    |         |                    |         |                   |
|------------------------|-------------------|--------------------|--------------------|--------------------|-------------------------------------|-----------------------------------------------------------------------------------------------|---------------------------------|----------------------------|-----------------------------|--------------------|--------------|-------------------------|-----------------------|-------------------------------------------|---------|---------|---------|--------------------|--------------------|---------|--------------------|---------|-------------------|
| 1                      | 10.37             | 72.3               | 10                 | 10/23              | Y986y                               | (K) N S F N N / E / A Y Y V L E / G / V / P H Q L / L / P P E P P S P A R A P V P S A T K (N) | 3854.99                         | 81.1517                    | 301.2                       | 138585.5/6.11      | Homo sapiens | <a href="#">4755142</a> | <a href="#">14485</a> | inositol polyphosphate phosphatase-like 1 |         |         |         |                    |                    |         |                    |         |                   |
| Fragment-ion (m/z)     | 688.52            | 763.51             | 796.50             | 815.74             | 840.46                              | 850.33                                                                                        | 858.45                          | 869.34                     | 895.88                      | 906.52             | 934.43       | 947.03                  | 953.13                | 969.74                                    | 1003.72 | 1018.83 | 1029.95 | 1088.37            | 1120.56            | 1145.05 | 1158.80            | 1197.41 | 1281.25           |
| Frac. Inten.(% of TIC) | 11.80             | 5.71               | 2.86               | 3.23               | 3.59                                | 16.99                                                                                         | 1.96                            | 2.88                       | 2.36                        | 2.52               | 3.74         | 2.18                    | 2.81                  | 3.94                                      | 1.98    | 2.16    | 2.96    | 3.15               | 9.85               | 4.26    | 4.46               | 2.39    | 2.22              |
| Rel. Inten.(% of BP)   | 69.48             | 33.62              | 16.86              | 19.04              | 21.11                               | 100.00                                                                                        | 11.57                           | 16.94                      | 13.88                       | 14.82              | 22.04        | 12.86                   | 16.52                 | 23.20                                     | 11.68   | 12.70   | 17.41   | 18.55              | 58.00              | 25.06   | 26.26              | 14.05   | 13.07             |
| Score                  | 1.00              | 1.00               | 1.00               | 1.00               | 0.50                                | 1.00                                                                                          | 1.00                            | -0.17                      | -0.14                       | 1.00               | -0.22        | -0.13                   | -0.17                 | 0.50                                      | -0.12   | -0.13   | -0.17   | 1.00               | 1.00               | -0.25   | 1.00               | -0.14   | 1.00              |
| Ion-type               | y <sup>++14</sup> | y <sup>+++22</sup> | y <sup>+++23</sup> | y <sup>+++24</sup> | y <sup>++17</sup> -H <sub>2</sub> O | y <sup>++17</sup>                                                                             | y <sup>+++25</sup>              |                            |                             | y <sup>++18</sup>  |              |                         |                       | b <sub>8</sub> -H <sub>2</sub> O          |         |         |         | y <sup>+++30</sup> | y <sup>+++31</sup> |         | y <sup>+++32</sup> |         | b <sup>++22</sup> |
| Delta Da               | 0.13              | 0.42               | 0.39               | 0.62               | -0.50                               | 0.37                                                                                          | 0.32                            |                            |                             | 0.02               |              |                         |                       | -0.61                                     |         |         |         | 0.47               | 0.31               |         | 0.54               |         | 0.65              |

# Peak 352

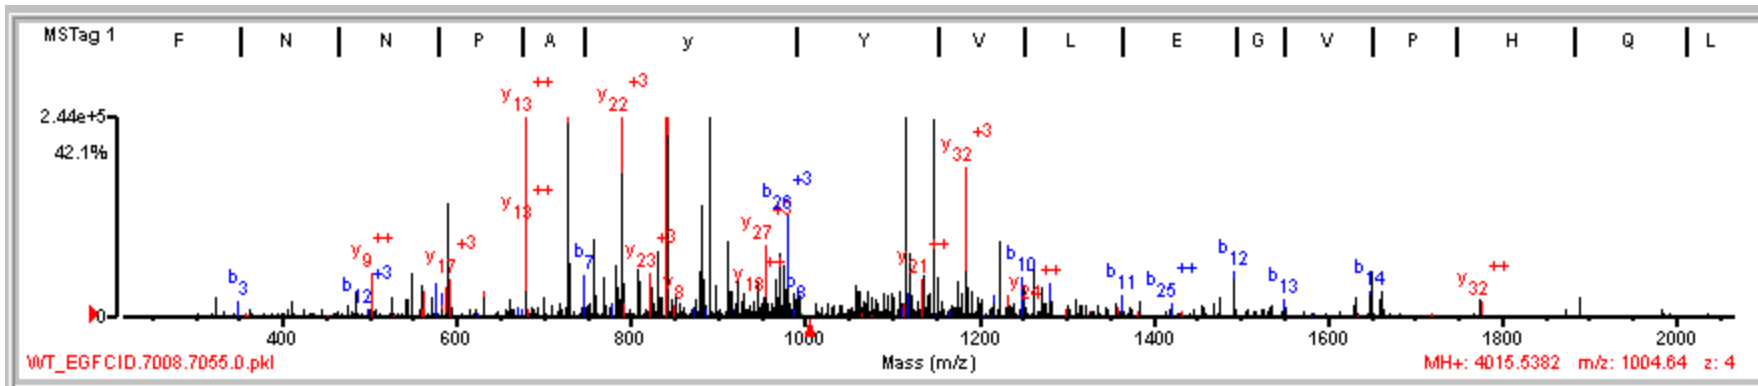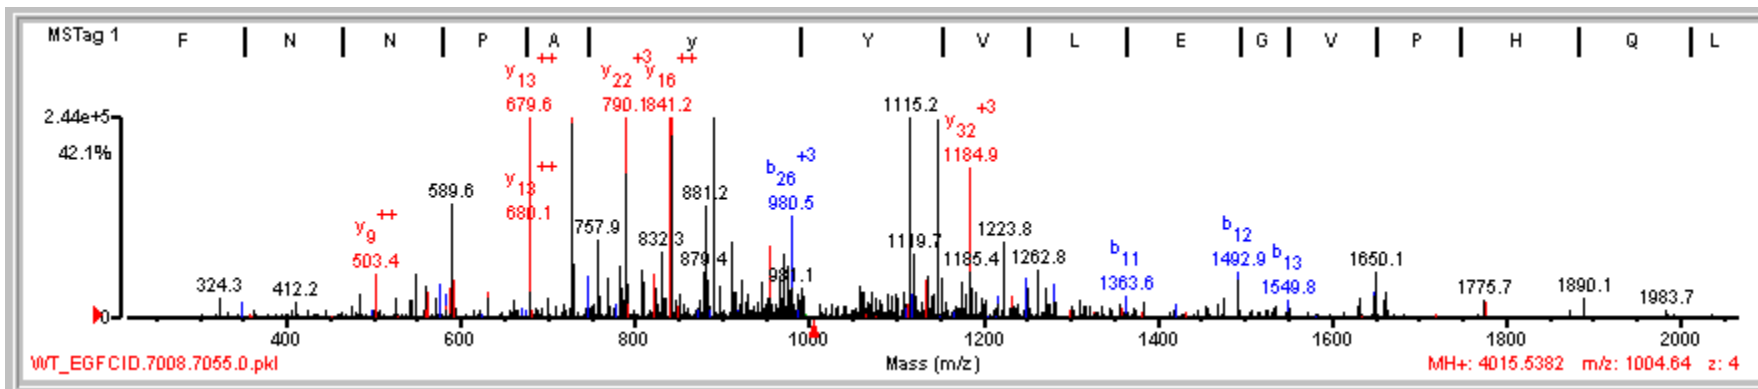

1 15.25 84.5 12 6/24 T1013t Y986y (K) N S F / N N / P / A Y Y V / L E / G V / P / H Q L L / P / P E / P / P S P / A R A P V P S A t K (N) 3854.99 160.5517 154.2 138585.5/6.11 Homo sapiens [4755142](#) [14485](#) inositol polyphosphate phosphatase-like 1

| Fragment-ion (m/z)      | 589.59 | 679.60            | 728.58                          | 757.86             | 790.08             | 809.42 | 832.34                              | 841.19            | 881.15                              | 890.14            | 912.63 | 923.19             | 955.37 | 967.57 | 971.53                          | 976.16 | 977.43 | 980.54             | 1115.21            | 1135.39           | 1147.59            | 1184.92 | 1223.82            | 1492.90         |
|-------------------------|--------|-------------------|---------------------------------|--------------------|--------------------|--------|-------------------------------------|-------------------|-------------------------------------|-------------------|--------|--------------------|--------|--------|---------------------------------|--------|--------|--------------------|--------------------|-------------------|--------------------|---------|--------------------|-----------------|
| Frac. Inten. (% of TIC) | 2.82   | 5.91              | 11.15                           | 1.67               | 9.98               | 1.71   | 1.61                                | 15.58             | 3.32                                | 15.03             | 2.11   | 1.66               | 0.06   | 1.72   | 2.83                            | 0.05   | 1.93   | 0.08               | 3.99               | 2.33              | 5.42               | 5.23    | 1.98               | 1.82            |
| Rel. Inten. (% of BP)   | 18.10  | 37.91             | 71.54                           | 10.73              | 64.06              | 10.95  | 10.35                               | 100.00            | 21.32                               | 96.42             | 13.57  | 10.63              | 0.41   | 11.02  | 18.18                           | 0.32   | 12.38  | 0.51               | 25.60              | 14.98             | 34.79              | 33.56   | 12.68              | 11.68           |
| Score                   | -0.18  | 1.00              | 1.00                            | 1.00               | 1.00               | -0.11  | 0.50                                | 1.00              | 0.50                                | 1.00              | -0.14  | 1.00               | 1.00   | -0.11  | 0.50                            | -0.12  | -0.12  | 1.50               | 1.00               | 1.00              | -0.34              | 1.00    | 1.00               |                 |
| Ion-type                |        | y++ <sub>13</sub> | b <sub>7</sub> -NH <sub>3</sub> | y+++ <sub>21</sub> | y+++ <sub>22</sub> |        | y++ <sub>16</sub> -H <sub>2</sub> O | y++ <sub>16</sub> | y++ <sub>17</sub> -H <sub>2</sub> O | y++ <sub>17</sub> |        | y+++ <sub>26</sub> | st     |        | b <sub>6</sub> -NH <sub>3</sub> | st     |        | b+++ <sub>26</sub> | y+++ <sub>30</sub> | y++ <sub>21</sub> | y+++ <sub>31</sub> |         | y+++ <sub>33</sub> | b <sub>12</sub> |
| Delta Da                |        | -0.25             |                                 | 0.47               | 0.33               |        | -0.07                               | -0.23             | 0.21                                | 0.19              |        | 0.71               |        |        | 0.20                            |        |        | 0.41               | 0.66               | -0.20             | 0.69               |         | 0.89               | 0.29            |
|                         |        |                   | y++ <sub>14</sub>               |                    |                    |        | y <sub>8</sub> -H <sub>2</sub> O    |                   |                                     |                   |        |                    |        |        | 0.50                            |        |        | 1.50               |                    |                   |                    |         |                    |                 |
|                         |        |                   | 0.21                            |                    |                    |        | -0.06                               |                   |                                     |                   |        |                    |        |        | st                              |        |        | 0.55               |                    |                   |                    |         |                    |                 |

# Peak 353

Ions that verify assignment

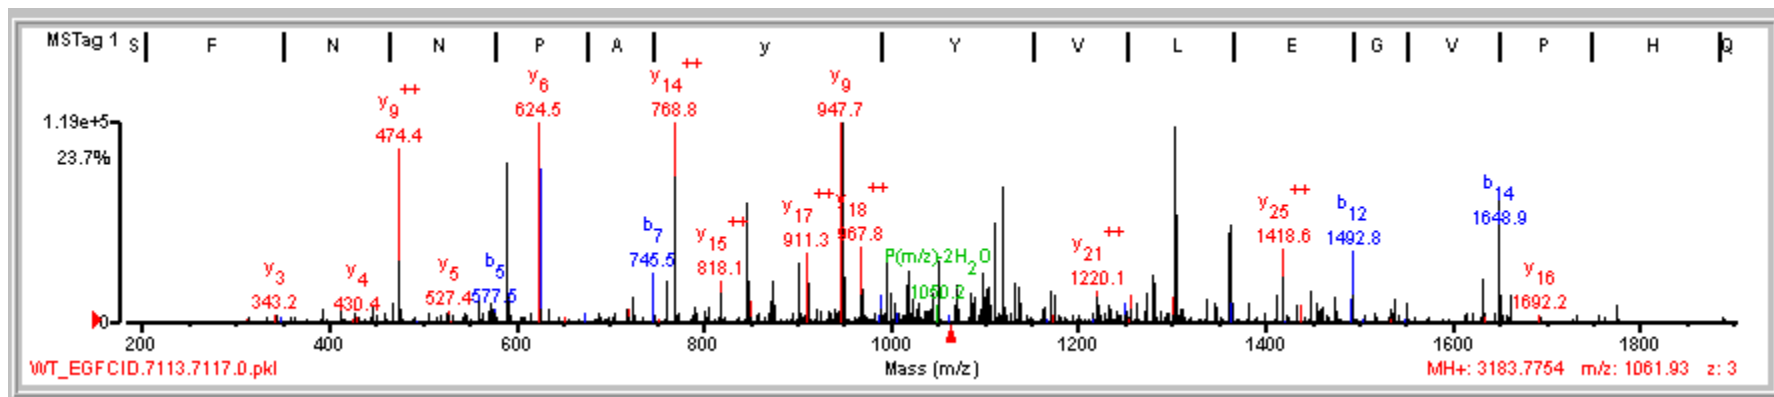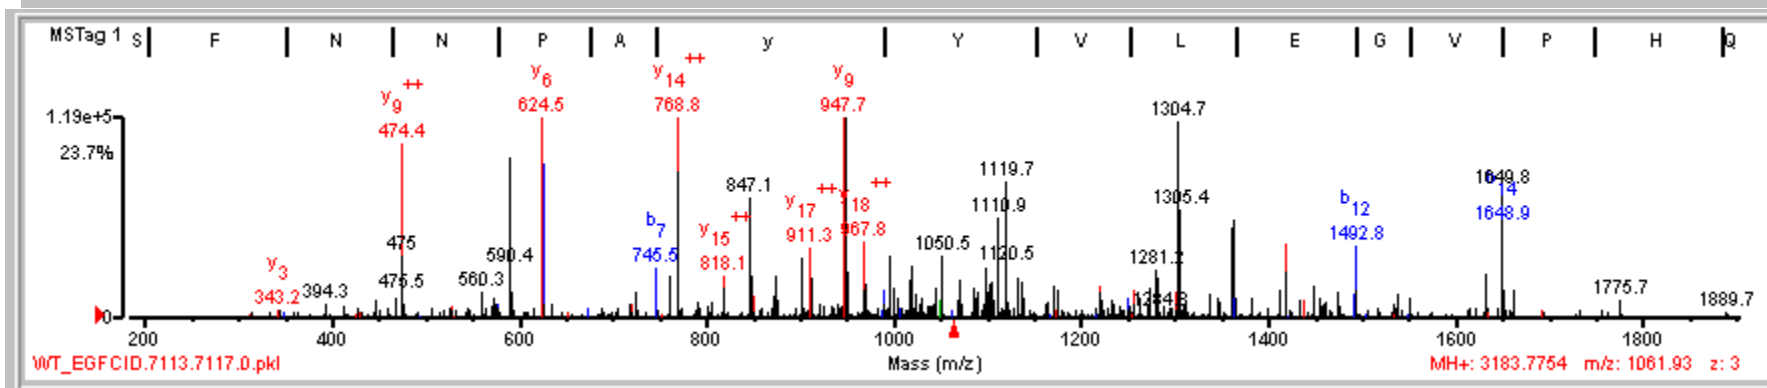

| Rank                   | Score            | SPI (%) | BCS            | # Unmatched Ions | Variable sites    | Sequence                                                               | MH <sup>+</sup> Calculated (Da) | MH <sup>+</sup> Error (Da)          | MH <sup>+</sup> Error (ppm) | Protein MW/pl (Da) | Species           | Accession #             | MS-Digest Index #     | Protein Name                              |         |                   |                   |                   |                   |                   |         |                   |                 |                 |         |
|------------------------|------------------|---------|----------------|------------------|-------------------|------------------------------------------------------------------------|---------------------------------|-------------------------------------|-----------------------------|--------------------|-------------------|-------------------------|-----------------------|-------------------------------------------|---------|-------------------|-------------------|-------------------|-------------------|-------------------|---------|-------------------|-----------------|-----------------|---------|
| 1                      | 17.83            | 82.8    | 12             | 6/25             | Y986y             | (K)N S F/N/N/P A I y V Y/L/E/G/V I P H Q L L I P P E I P P S P A R (A) | 3103.56                         | 80.2119                             | 77.1                        | 138585.5/6.11      | Homo sapiens      | <a href="#">4755142</a> | <a href="#">14485</a> | inositol polyphosphate phosphatase-like 1 |         |                   |                   |                   |                   |                   |         |                   |                 |                 |         |
| Fragment-ion (m/z)     | 474.45           | 589.44  | 624.53         | 745.53           | 768.79            | 818.08                                                                 | 847.08                          | 902.10                              | 911.26                      | 947.67             | 967.82            | 1018.16                 | 1070.19               | 1099.16                                   | 1110.88 | 1119.72           | 1220.06           | 1281.16           | 1304.66           | 1361.90           | 1362.50 | 1418.56           | 1492.84         | 1648.90         | 1649.75 |
| Frac. Inten.(% of TIC) | 4.63             | 3.99    | 7.71           | 1.37             | 8.88              | 1.25                                                                   | 2.88                            | 1.69                                | 3.11                        | 25.63              | 2.30              | 1.79                    | 1.68                  | 1.76                                      | 2.70    | 4.56              | 1.30              | 2.13              | 5.84              | 1.51              | 3.06    | 2.48              | 2.20            | 1.53            | 4.01    |
| Rel. Inten.(% of BP)   | 18.07            | 15.55   | 30.08          | 5.35             | 34.66             | 4.86                                                                   | 11.25                           | 6.58                                | 12.13                       | 100.00             | 8.98              | 6.99                    | 6.57                  | 6.87                                      | 10.53   | 17.81             | 5.09              | 8.32              | 22.77             | 5.89              | 11.95   | 9.66              | 8.57            | 5.99            | 15.64   |
| Score                  | 1.00             | -0.16   | 1.00           | 1.00             | 1.00              | 1.00                                                                   | 1.00                            | 0.50                                | 1.00                        | 1.00               | 1.00              | -0.07                   | -0.07                 | 1.00                                      | -0.11   | 1.00              | 1.00              | 1.00              | 1.00              | 1.00              | -0.12   | 1.00              | 1.00            | 1.00            | -0.16   |
| Ion-type               | y <sup>++9</sup> |         | y <sub>6</sub> | b <sub>7</sub>   | y <sup>++14</sup> | y <sup>++15</sup>                                                      | y <sup>++16</sup>               | y <sup>++17</sup> -H <sub>2</sub> O | y <sup>++17</sup>           | y <sub>9</sub>     | y <sup>++18</sup> |                         |                       | y <sup>++20</sup>                         |         | b <sup>++19</sup> | y <sup>++21</sup> | b <sup>++22</sup> | y <sup>++23</sup> | y <sup>++24</sup> |         | y <sup>++25</sup> | b <sub>12</sub> | b <sub>14</sub> |         |
| Delta Da               | 0.20             |         | 0.18           | 0.20             | 0.37              | 0.13                                                                   | 0.61                            | 0.12                                | 0.27                        | 0.18               | 0.29              |                         |                       | 0.57                                      |         | 0.70              | -0.05             | 0.56              | 0.51              | 0.72              |         | 0.36              | 0.23            | 0.20            |         |

# Peak 354

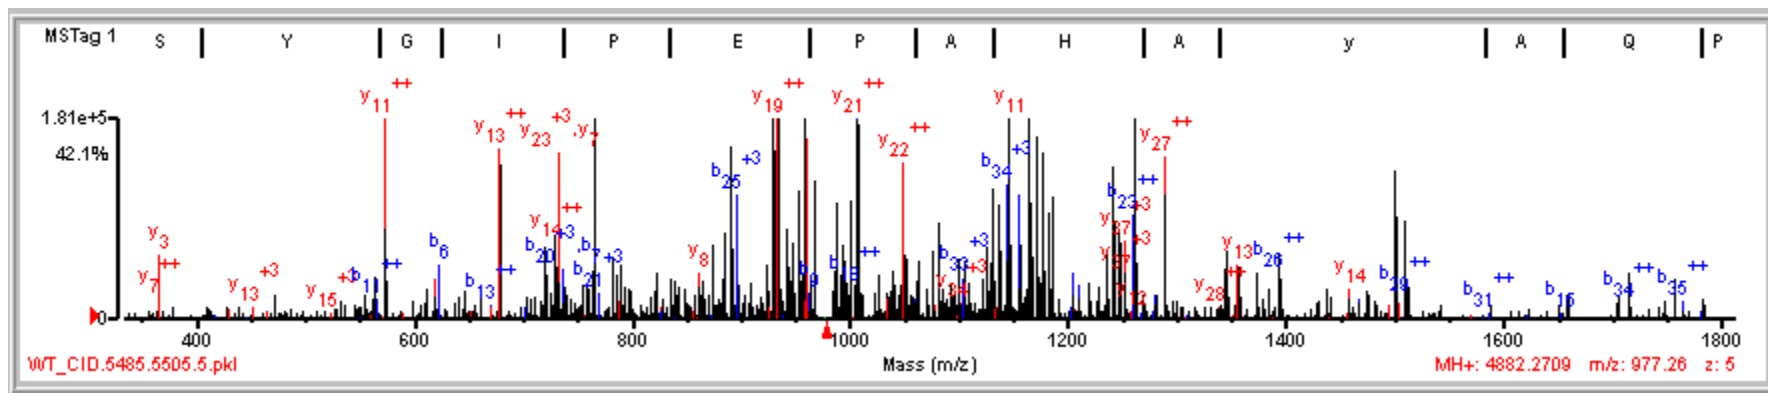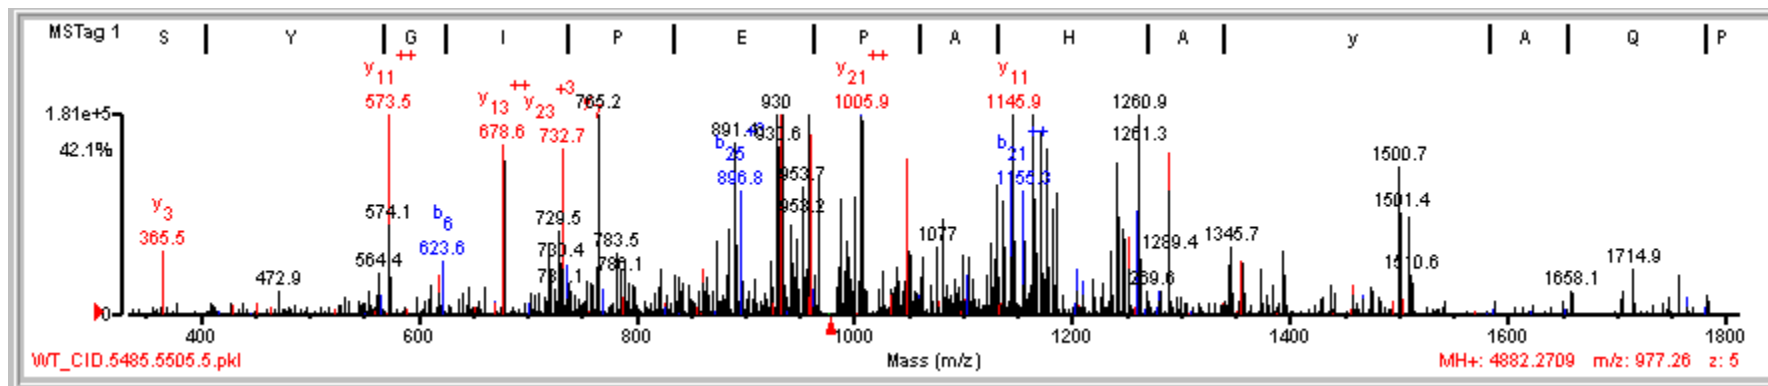

| Rank                   | Score             | SPI (%)           | BCS            | # Unmatched Ions | # Variable sites  | Sequence                                                                                                              | MH <sup>+</sup> Calculated (Da) | MH <sup>+</sup> Error (Da) | MH <sup>+</sup> Error (ppm) | Protein MW(pI) (Da) | Species            | Accession #     | MS-Digest Index # | Protein Name                                           |                    |                                     |                   |         |         |                    |                                  |                    |         |                   |         |
|------------------------|-------------------|-------------------|----------------|------------------|-------------------|-----------------------------------------------------------------------------------------------------------------------|---------------------------------|----------------------------|-----------------------------|---------------------|--------------------|-----------------|-------------------|--------------------------------------------------------|--------------------|-------------------------------------|-------------------|---------|---------|--------------------|----------------------------------|--------------------|---------|-------------------|---------|
| 1                      | 14.86             | 75.5              | 11             | 7/25             | Y207y             | (R) Y S N S Y G I P E P A H A y A Q P Q T T T I P L P A V I S G I P G A A I V T I P L I P / S T Q / N G P V F A K (A) | 4802.41                         | 79.8649                    | -20.8                       | 33777.2/6.26        | Homo sapiens       | 4885153         | 35902             | v-ork sarcoma virus CT10 oncogene homolog (avian)-like |                    |                                     |                   |         |         |                    |                                  |                    |         |                   |         |
| Fragment-ion (m/z)     | 573.54            | 678.63            | 732.68         | 765.15           | 891.36            | 929.98                                                                                                                | 933.88                          | 959.06                     | 987.36                      | 1005.90             | 1006.76            | 1049.23         | 1131.01           | 1137.19                                                | 1143.30            | 1145.88                             | 1155.29           | 1164.99 | 1171.82 | 1177.25            | 1241.75                          | 1247.39            | 1260.88 | 1288.12           | 1500.74 |
| Frac. Inten.(% of TIC) | 5.83              | 4.32              | 2.39           | 2.62             | 3.46              | 6.09                                                                                                                  | 9.28                            | 4.45                       | 2.16                        | 3.77                | 6.66               | 3.24            | 2.23              | 3.06                                                   | 2.42               | 5.61                                | 3.43              | 5.29    | 2.95    | 4.09               | 2.75                             | 2.10               | 5.69    | 3.35              | 2.77    |
| Rel. Inten.(% of BP)   | 62.78             | 46.63             | 25.73          | 28.22            | 37.29             | 65.65                                                                                                                 | 100.00                          | 47.91                      | 23.22                       | 40.83               | 71.72              | 34.93           | 24.00             | 32.95                                                  | 28.06              | 60.43                               | 36.91             | 56.94   | 31.72   | 44.08              | 29.57                            | 22.66              | 61.32   | 36.10             | 29.86   |
| Score                  | 1.00              | 1.00              | 1.00           | -0.28            | 1.00              | 1.00                                                                                                                  | 1.00                            | 1.00                       | -0.23                       | 1.00                | 1.00               | 1.00            | 1.00              | -0.33                                                  | 1.00               | 1.00                                | 1.00              | -0.57   | -0.32   | 1.00               | 0.50                             | 1.00               | -0.61   | 1.00              | -0.30   |
| Ion-type               | y++ <sub>11</sub> | y++ <sub>13</sub> | y <sub>7</sub> |                  | b++ <sub>18</sub> | b+++ <sub>26</sub>                                                                                                    | a <sub>9</sub>                  | b+++ <sub>27</sub>         |                             | y++ <sub>21</sub>   | b+++ <sub>28</sub> | y <sub>10</sub> | b <sub>11</sub>   |                                                        | b+++ <sub>24</sub> | b++ <sub>21</sub> -H <sub>2</sub> O | b++ <sub>21</sub> |         |         | b+++ <sub>35</sub> | y <sub>12</sub> -NH <sub>3</sub> | b+++ <sub>37</sub> |         | y++ <sub>27</sub> |         |
| Delta Da               | 0.24              | 0.28              | 0.28           |                  | 0.49              | 0.55                                                                                                                  | -0.55                           | 0.82                       |                             | 0.36                | 0.30               | 0.69            | 0.50              |                                                        | 0.43               | -0.11                               | 0.29              |         |         | 0.70               | 0.10                             | 0.79               |         | 0.42              |         |

# Peak 355

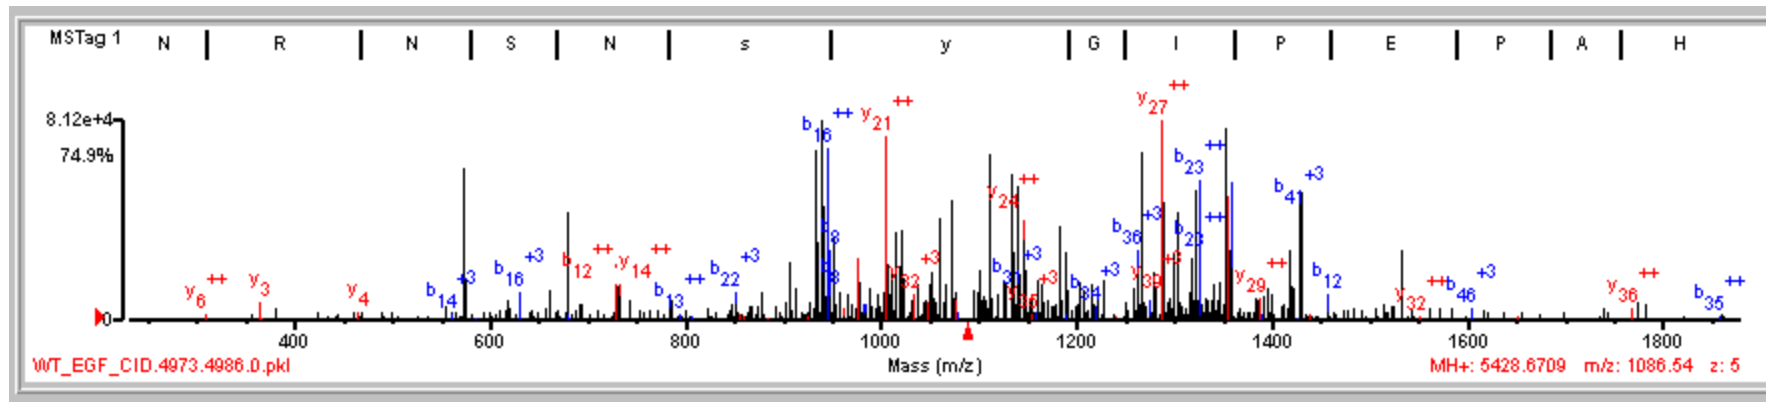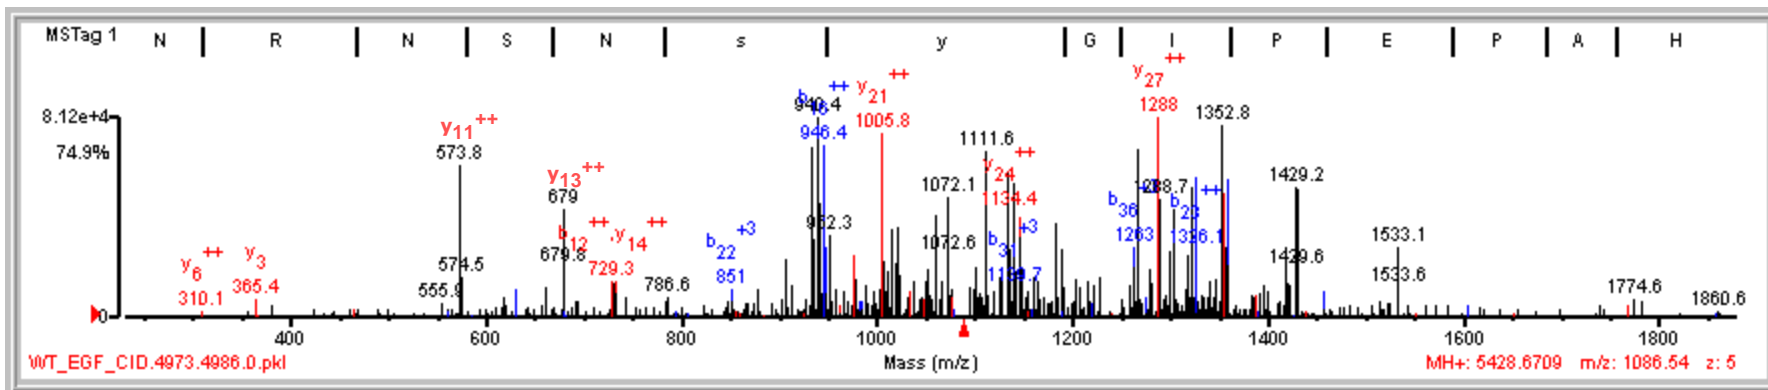

| Rank                    | Score                         | SPI (%)                       | BCS                           | # Unmatched Ions              | Variable sites                | Sequence                                                                                                           | MH* Calculated (Da)           | MH* Error (Da)                | MH* Error (ppm) | Protein MW/pi (Da)            | Species                       | Accession #                   | MS-Digest Index #             | Protein Name                                           |                               |                               |                               |                               |                               |                               |                               |                               |                               |                 |         |
|-------------------------|-------------------------------|-------------------------------|-------------------------------|-------------------------------|-------------------------------|--------------------------------------------------------------------------------------------------------------------|-------------------------------|-------------------------------|-----------------|-------------------------------|-------------------------------|-------------------------------|-------------------------------|--------------------------------------------------------|-------------------------------|-------------------------------|-------------------------------|-------------------------------|-------------------------------|-------------------------------|-------------------------------|-------------------------------|-------------------------------|-----------------|---------|
| 1                       | 15.05                         | 77.6                          | 10                            | 5/25                          | Y198y S197s                   | (K)HGRNRNSNs y G I P E P A H A Y A Q P Q T Y T I P L I P A V S I G S P G A A I T I P L I P S T Q N G P V F A K (A) | 5266.63                       | 162.0404                      | 388.3           | 33777.2/6.26                  | Homo sapiens                  | <a href="#">4885153</a>       | <a href="#">35902</a>         | v-ork sarcoma virus CT10 oncogene homolog (avian)-like |                               |                               |                               |                               |                               |                               |                               |                               |                               |                 |         |
| Fragment-ion (m/z)      | 573.83                        | 578.99                        | 934.11                        | 940.41                        | 946.36                        | 952.34                                                                                                             | 1005.75                       | 1022.39                       | 1060.05         | 1072.09                       | 1111.64                       | 1134.67                       | 1140.49                       | 1145.72                                                | 1182.57                       | 1262.97                       | 1267.17                       | 1287.95                       | 1303.90                       | 1325.60                       | 1352.85                       | 1355.99                       | 1358.28                       | 1428.32         | 1429.16 |
| Frac. Inten. (% of TIC) | 3.40                          | 3.52                          | 4.11                          | 6.58                          | 5.20                          | 3.06                                                                                                               | 5.62                          | 2.91                          | 0.08            | 3.56                          | 3.30                          | 4.06                          | 3.04                          | 4.12                                                   | 3.65                          | 3.01                          | 3.80                          | 8.31                          | 3.43                          | 3.94                          | 5.07                          | 3.22                          | 4.55                          | 3.35            | 5.09    |
| Rel. Inten. (% of BP)   | 40.92                         | 42.36                         | 49.48                         | 79.13                         | 62.54                         | 36.79                                                                                                              | 67.61                         | 35.08                         | 0.94            | 42.82                         | 39.73                         | 48.83                         | 36.58                         | 49.60                                                  | 43.87                         | 36.23                         | 45.67                         | 100.00                        | 41.31                         | 47.40                         | 61.04                         | 38.88                         | 54.88                         | 40.32           | 61.19   |
| Score                   | 1.00                          | 1.00                          | 1.00                          | -0.79                         | 1.00                          | 1.00                                                                                                               | 1.00                          | 1.00                          | 0.25            | -0.43                         | 1.00                          | 1.00                          | 1.00                          | 1.00                                                   | 1.00                          | 0.25                          | -0.46                         | 1.00                          | -0.41                         | 1.00                          | -0.81                         | 1.00                          | 1.00                          | 1.00            | 0.25    |
| Ion-type                | y <sub>11</sub> <sup>++</sup> | y <sub>13</sub> <sup>++</sup> | y <sub>14</sub> <sup>++</sup> | b <sub>11</sub> <sup>++</sup> | b <sub>12</sub> <sup>++</sup> | y <sub>14</sub> <sup>++</sup>                                                                                      | b <sub>13</sub> <sup>++</sup> | b <sub>22</sub> <sup>++</sup> | st              | b <sub>11</sub> <sup>++</sup> | y <sub>11</sub> <sup>++</sup> | b <sub>11</sub> <sup>++</sup> | b <sub>11</sub> <sup>++</sup> | y <sub>11</sub> <sup>++</sup>                          | y <sub>11</sub> <sup>++</sup> | b <sub>11</sub> <sup>++</sup> | y <sub>11</sub> <sup>++</sup> | y <sub>11</sub> <sup>++</sup> | y <sub>11</sub> <sup>++</sup> | b <sub>11</sub> <sup>++</sup> | y <sub>13</sub> <sup>++</sup> | b <sub>11</sub> <sup>++</sup> | b <sub>11</sub> <sup>++</sup> | a <sub>11</sub> |         |
| Delta Da                | 0.53                          | 0.62                          | 0.60                          | -0.01                         | 0.61                          | 0.21                                                                                                               | 0.61                          | 0.73                          |                 | 0.81                          | 0.56                          | 0.65                          | 0.13                          | -0.06                                                  | 0.46                          |                               |                               | 0.25                          |                               | -0.44                         | 0.28                          | 0.33                          | 0.32                          | -0.38           |         |

# Peak 356

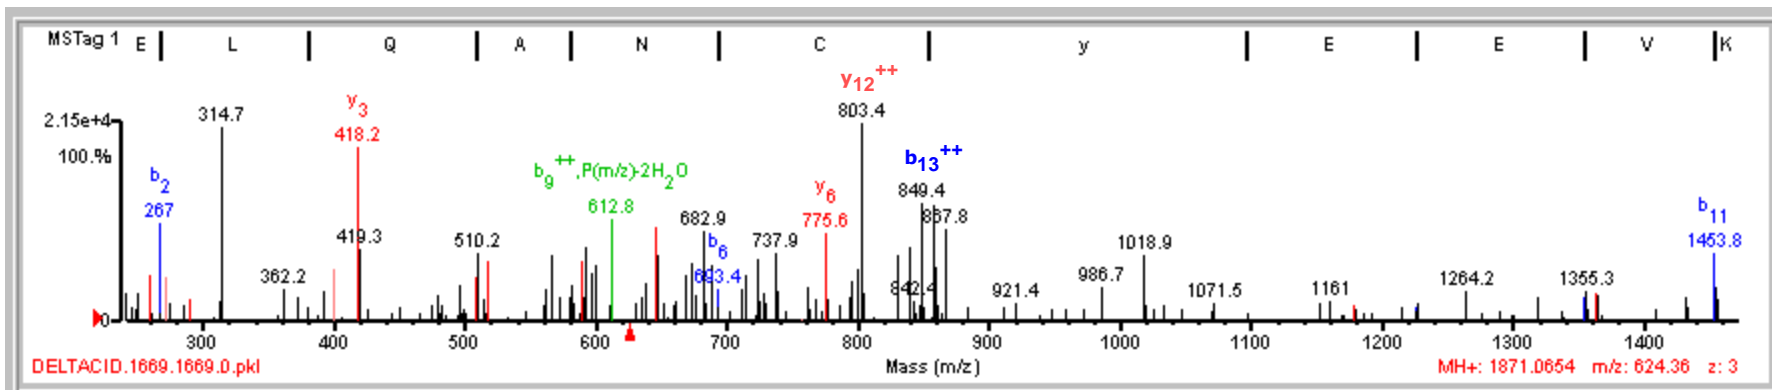

| Rank | Score | SPI (%) | BCS | # Unmatched Ions | Variable sites | Sequence                           | MH <sup>+</sup> Calculated (Da) | MH <sup>+</sup> Error (Da) | MH <sup>+</sup> Error (ppm) | Protein MW/pi (Da) | Species      | Accession #             | MS-Digest Index #     | Protein Name           |
|------|-------|---------|-----|------------------|----------------|------------------------------------|---------------------------------|----------------------------|-----------------------------|--------------------|--------------|-------------------------|-----------------------|------------------------|
| 1    | 8.31  | 83.0    | 7   | 2/12             | Y140y          | (K)H/E L Q/A/N C/y E/E V K D\R (C) | 1790.81                         | 80.2528                    | 153.1                       | 18502.6/8.22       | Homo sapiens | <a href="#">5031635</a> | <a href="#">11782</a> | cofilin 1 (non-muscle) |

| Fragment-ion (m/z)      | 267.00         | 314.66 | 418.23         | 509.30                       | 646.63                       | 682.91                        | 737.91 | 803.35                        | 849.42                        | 858.34                                          | 867.84                        | 1453.80         |
|-------------------------|----------------|--------|----------------|------------------------------|------------------------------|-------------------------------|--------|-------------------------------|-------------------------------|-------------------------------------------------|-------------------------------|-----------------|
| Frac. Inten. (% of TIC) | 5.59           | 10.21  | 13.01          | 5.99                         | 8.48                         | 5.78                          | 6.80   | 14.26                         | 6.97                          | 12.61                                           | 4.87                          | 5.42            |
| Rel. Inten. (% of BP)   | 39.24          | 71.59  | 91.27          | 42.04                        | 59.48                        | 40.56                         | 47.68  | 100.00                        | 48.88                         | 88.46                                           | 34.18                         | 38.03           |
| Score                   | 1.00           | -0.72  | 1.00           | 1.00                         | 1.00                         | 1.00                          | -0.48  | 1.00                          | 1.00                          | 0.50                                            | 1.00                          | 1.00            |
| Ion-type                | b <sub>2</sub> |        | y <sub>3</sub> | y <sup>++</sup> <sub>7</sub> | y <sub>5</sub>               | y <sup>++</sup> <sub>10</sub> |        | y <sup>++</sup> <sub>12</sub> | b <sup>++</sup> <sub>13</sub> | y <sup>++</sup> <sub>13</sub> -H <sub>2</sub> O | y <sup>++</sup> <sub>13</sub> | b <sub>11</sub> |
| Delta Da                | -0.11          |        | -0.01          | -0.42                        | 0.28                         | 0.64                          |        | 0.51                          | 0.58                          | -0.02                                           | 0.48                          | 0.25            |
|                         |                |        |                |                              | y <sup>++</sup> <sub>9</sub> |                               |        |                               |                               |                                                 |                               |                 |
|                         |                |        |                |                              | -0.12                        |                               |        |                               |                               |                                                 |                               |                 |

# Peak 357

Ions that verify assignment

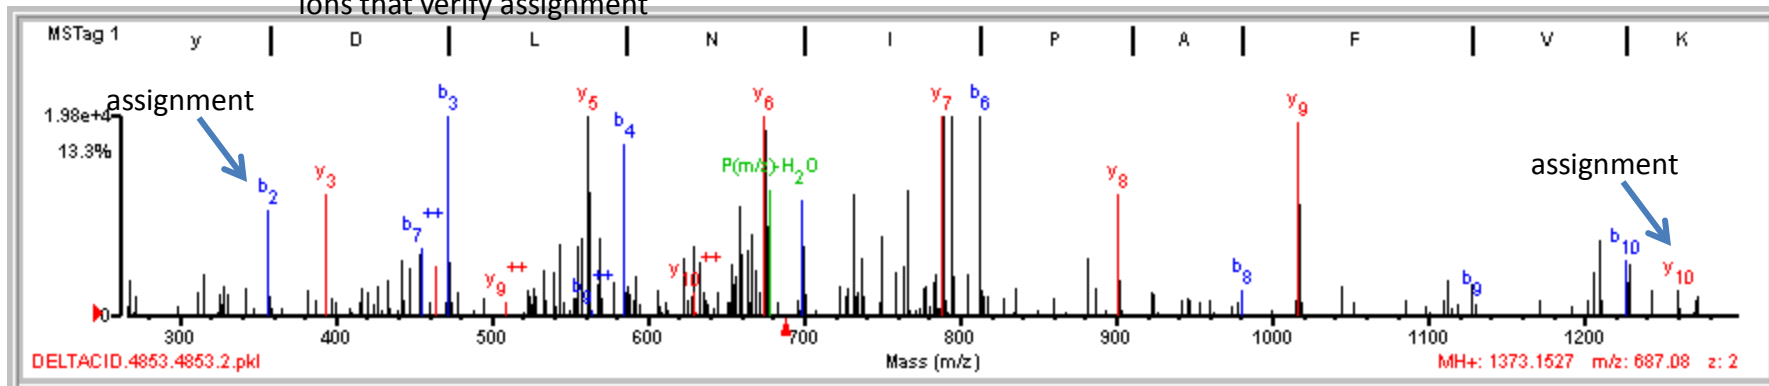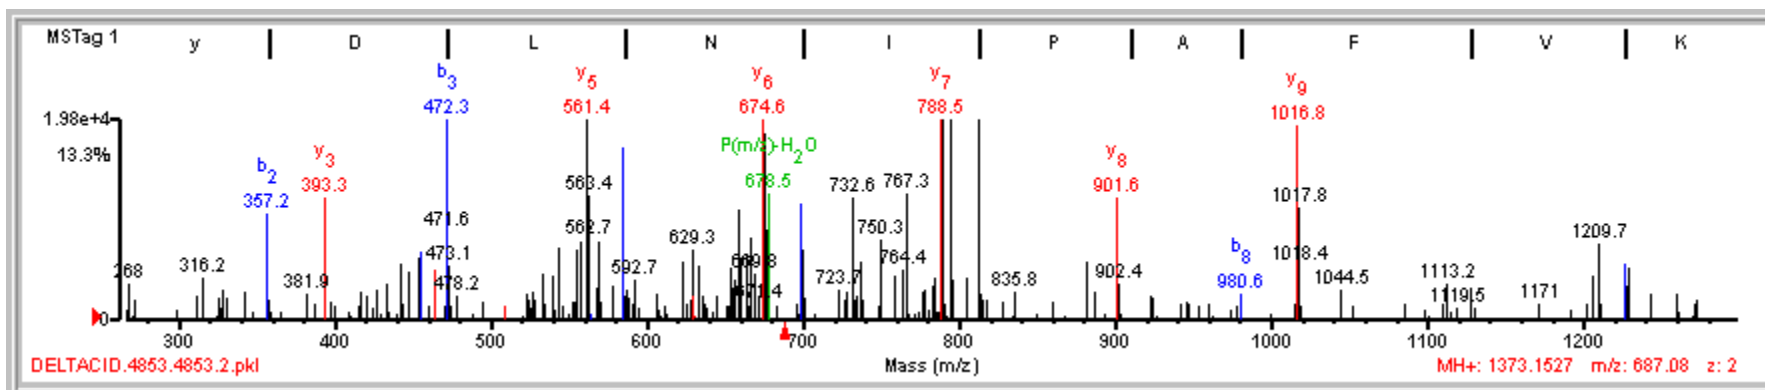

| Rank | Score | SPI (%) | BCS | # Unmatched Ions | Variable sites | Sequence                      | MH <sup>+</sup> Calculated (Da) | MH <sup>+</sup> Error (Da) | MH <sup>+</sup> Error (ppm) | Protein MW/pI (Da) | Species      | Accession #              | MS-Digest Index #     | Protein Name                    |
|------|-------|---------|-----|------------------|----------------|-------------------------------|---------------------------------|----------------------------|-----------------------------|--------------------|--------------|--------------------------|-----------------------|---------------------------------|
| 1    | 11.93 | 91.0    | 6   | 4/18             | Y110y          | (R) I Y D L N I P A/F V K (F) | 1292.72                         | 80.4278                    | 336.1                       | 42915.3/6.49       | Homo sapiens | <a href="#">52630425</a> | <a href="#">10256</a> | NCK adaptor protein 2 isoform A |
| 1    | 11.93 | 91.0    | 6   | 4/18             | Y110y          | (R) I Y D L N I P A/F V K (F) | 1292.72                         | 80.4278                    | 336.1                       | 42915.3/6.49       | Homo sapiens | <a href="#">52630423</a> | <a href="#">11943</a> | NCK adaptor protein 2 isoform A |

| Fragment-ion (m/z)     | 357.16         | 393.34         | 454.28                           | 472.27         | 557.25         | 561.40         | 585.28         | 654.37 | 658.76 | 674.55         | 699.30         | 732.55 | 767.32 | 788.52         | 795.40                          | 812.43         | 901.61         | 1016.76        |
|------------------------|----------------|----------------|----------------------------------|----------------|----------------|----------------|----------------|--------|--------|----------------|----------------|--------|--------|----------------|---------------------------------|----------------|----------------|----------------|
| Frac. Inten.(% of TIC) | 1.92           | 1.71           | 1.83                             | 4.68           | 2.12           | 28.53          | 3.25           | 2.23   | 2.56   | 7.43           | 2.94           | 2.33   | 1.92   | 8.66           | 6.61                            | 13.75          | 2.29           | 5.24           |
| Rel. Inten.(% of BP)   | 6.73           | 6.01           | 6.43                             | 16.39          | 7.43           | 100.00         | 11.38          | 7.82   | 8.97   | 26.03          | 10.30          | 8.18   | 6.74   | 30.35          | 23.17                           | 48.20          | 8.02           | 18.38          |
| Score                  | 1.00           | 1.00           | 0.50                             | 1.00           | 0.25           | 1.00           | 1.00           | -0.08  | -0.09  | 1.00           | 1.00           | -0.08  | -0.07  | 1.00           | 0.50                            | 1.00           | 1.00           | 1.00           |
| Ion-type               | b <sub>2</sub> | y <sub>3</sub> | b <sub>3</sub> -H <sub>2</sub> O | b <sub>3</sub> | a <sub>4</sub> | y <sub>5</sub> | b <sub>4</sub> |        |        | y <sub>6</sub> | b <sub>5</sub> |        |        | y <sub>7</sub> | b <sub>6</sub> -NH <sub>3</sub> | b <sub>6</sub> | y <sub>8</sub> | y <sub>9</sub> |
| Delta Da               | 0.04           | 0.09           | 0.14                             | 0.12           | 0.01           | 0.06           | 0.05           |        |        | 0.13           | 0.03           |        |        | 0.05           | 0.07                            | 0.07           | 0.06           | 0.18           |





# Peak 359

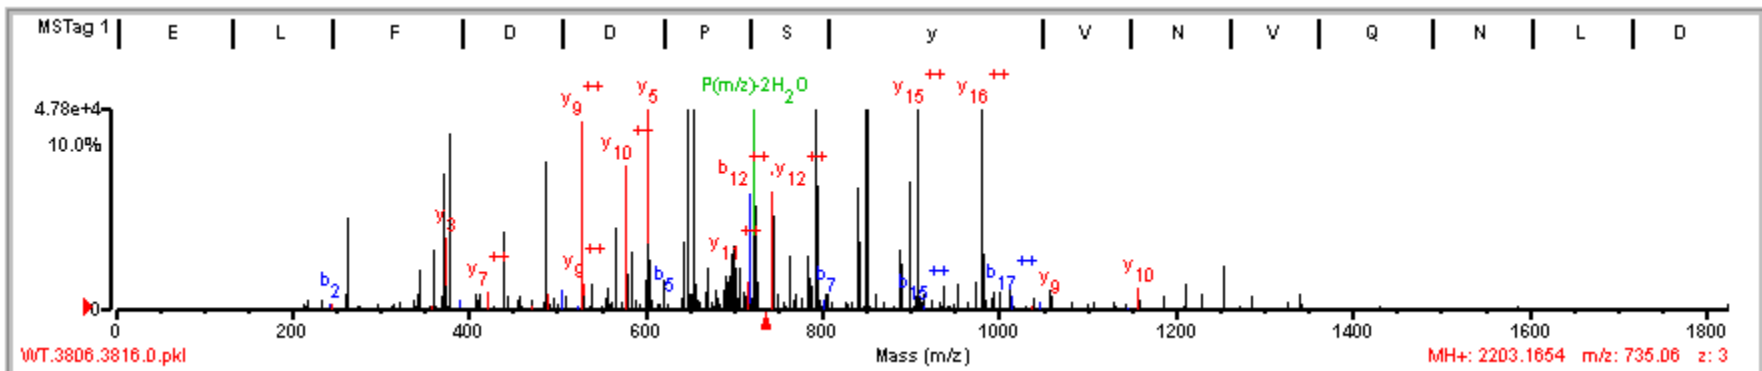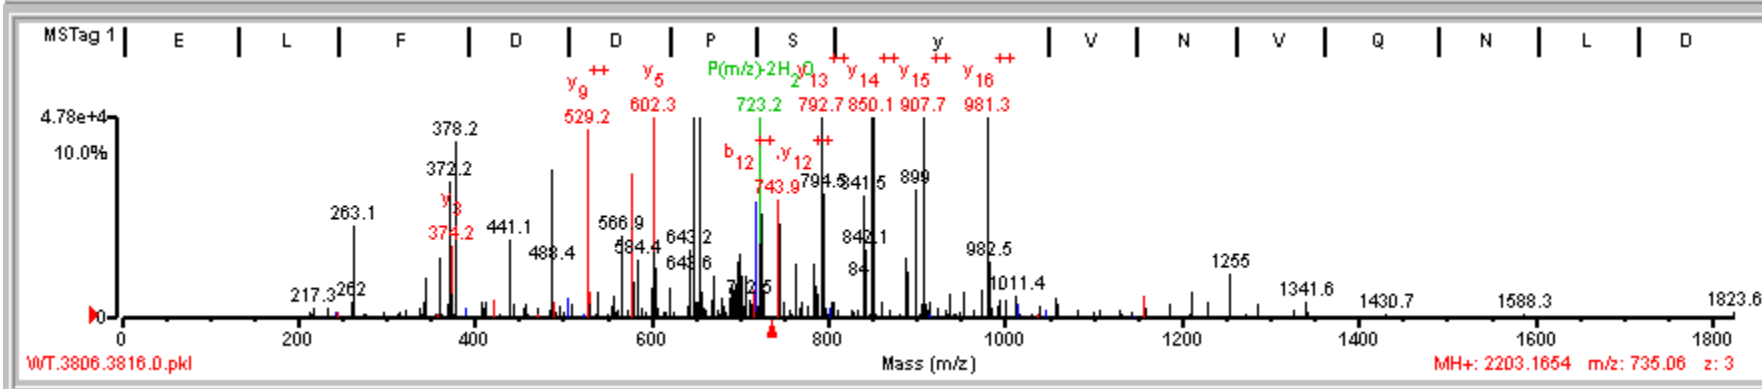

| Rank | Score | SPI (%) | BCS | # Unmatched Ions | Variable sites | Sequence                                    | MH <sup>+</sup> Calculated (Da) | MH <sup>+</sup> Error (Da) | MH <sup>+</sup> Error (ppm) | Protein MW/pl (Da) | Species      | Accession #              | MS-Digest Index #     | Protein Name                                                                 |
|------|-------|---------|-----|------------------|----------------|---------------------------------------------|---------------------------------|----------------------------|-----------------------------|--------------------|--------------|--------------------------|-----------------------|------------------------------------------------------------------------------|
| 1    | 15.46 | 87.7    | 11  | 4/23             | Y427y          | (R) E L/F/D/D/P/S/y/V/N V Q\N/L D/R A R (Q) | 2123.04                         | 80.1251                    | 72.1                        | 62849.5/6.10       | Homo sapiens | <a href="#">52693921</a> | <a href="#">18788</a> | SHC (Src homology 2 domain containing) transforming protein 1 isoform p66Shc |
| 1    | 15.46 | 87.7    | 11  | 4/23             | Y318y          | (R) E L/F/D/D/P/S/y/V/N V Q\N/L D/R A R (Q) | 2123.04                         | 80.1251                    | 72.1                        | 51681.9/6.71       | Homo sapiens | <a href="#">32261324</a> | <a href="#">26862</a> | SHC (Src homology 2 domain containing) transforming protein 1 isoform p52Shc |

| Fragment-ion (m/z)     | 372.22                           | 374.23         | 378.15                           | 487.31                       | 529.16                         | 566.93                        | 579.11                           | 602.32                         | 643.19                           | 648.60                        | 654.65         | 699.03                        | 700.91                        | 717.37                                          | 743.93                        | 792.68                                          | 841.47                                          | 850.13                        | 889.12                        | 898.68                                          | 898.99                        | 907.69                        | 981.26                        |
|------------------------|----------------------------------|----------------|----------------------------------|------------------------------|--------------------------------|-------------------------------|----------------------------------|--------------------------------|----------------------------------|-------------------------------|----------------|-------------------------------|-------------------------------|-------------------------------------------------|-------------------------------|-------------------------------------------------|-------------------------------------------------|-------------------------------|-------------------------------|-------------------------------------------------|-------------------------------|-------------------------------|-------------------------------|
| Frac. Inten.(% of TIC) | 1.20                             | 0.70           | 1.67                             | 1.51                         | 1.58                           | 0.73                          | 1.63                             | 2.06                           | 0.99                             | 8.82                          | 17.90          | 0.84                          | 0.73                          | 0.84                                            | 1.48                          | 22.52                                           | 1.40                                            | 11.67                         | 0.77                          | 0.76                                            | 1.56                          | 13.46                         | 5.19                          |
| Rel. Inten.(% of BP)   | 5.33                             | 3.12           | 7.42                             | 6.70                         | 7.00                           | 3.23                          | 7.24                             | 9.17                           | 4.42                             | 39.18                         | 79.48          | 3.74                          | 3.24                          | 3.73                                            | 6.55                          | 100.00                                          | 6.20                                            | 51.83                         | 3.40                          | 3.39                                            | 6.91                          | 59.76                         | 23.03                         |
| Score                  | 0.50                             | 1.00           | -0.07                            | 0.50                         | 1.00                           | 1.00                          | 1.00                             | 1.00                           | -0.04                            | -0.39                         | 1.00           | 0.50                          | 1.00                          | 1.00                                            | 1.00                          | 1.00                                            | 0.50                                            | 1.00                          | -0.03                         | 0.50                                            | 0.50                          | 1.00                          | 1.00                          |
| Ion-type               | b <sub>3</sub> -H <sub>2</sub> O | y <sub>3</sub> | b <sub>4</sub> -H <sub>2</sub> O | y <sup>++</sup> <sub>9</sub> | y <sup>+++</sup> <sub>14</sub> | y <sup>++</sup> <sub>10</sub> | b <sub>5</sub> -H <sub>2</sub> O | y <sup>+++</sup> <sub>16</sub> | b <sub>6</sub> -H <sub>2</sub> O | y <sup>++</sup> <sub>11</sub> | b <sub>6</sub> | b <sup>++</sup> <sub>12</sub> | y <sup>++</sup> <sub>13</sub> | y <sup>++</sup> <sub>14</sub> -H <sub>2</sub> O | y <sup>++</sup> <sub>14</sub> | y <sup>++</sup> <sub>15</sub> -H <sub>2</sub> O | y <sup>++</sup> <sub>15</sub> -H <sub>2</sub> O | y <sup>++</sup> <sub>15</sub> | y <sup>++</sup> <sub>16</sub> | y <sup>++</sup> <sub>16</sub> -H <sub>2</sub> O | y <sup>++</sup> <sub>16</sub> | y <sup>++</sup> <sub>16</sub> | y <sup>++</sup> <sub>16</sub> |
| Delta Da               | 0.03                             | -0.02          | 0.09                             | -0.13                        | -0.00                          | 0.28                          | 0.07                             | 0.35                           | -0.04                            | -0.27                         | 0.06           | -0.38                         | 0.30                          | 0.58                                            | 0.23                          | 0.28                                            | 0.59                                            | 0.28                          | 0.32                          |                                                 |                               |                               |                               |



# Peak 362

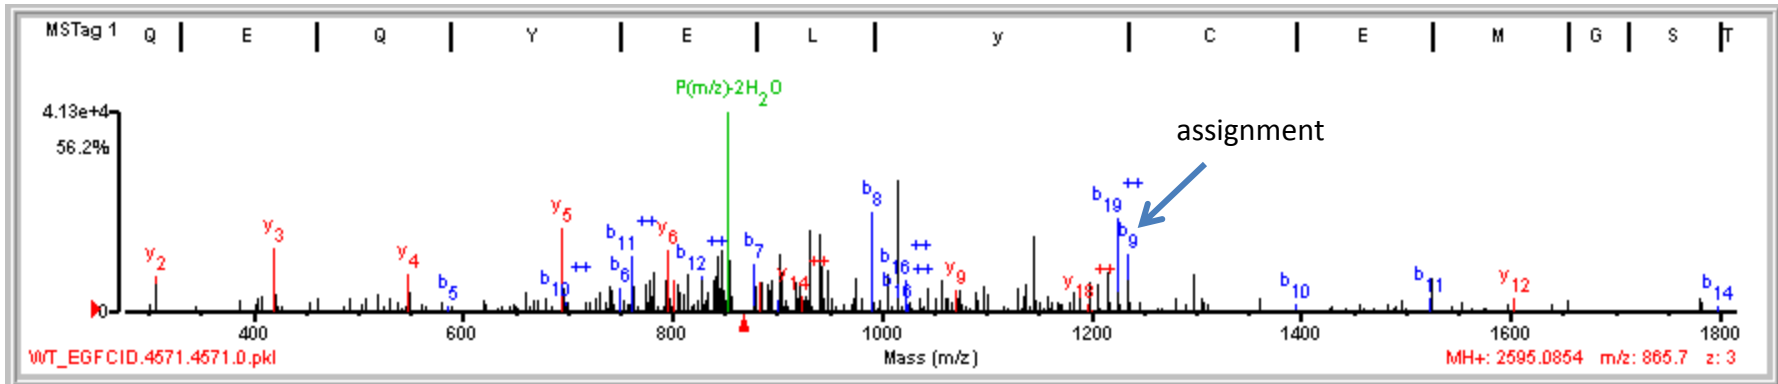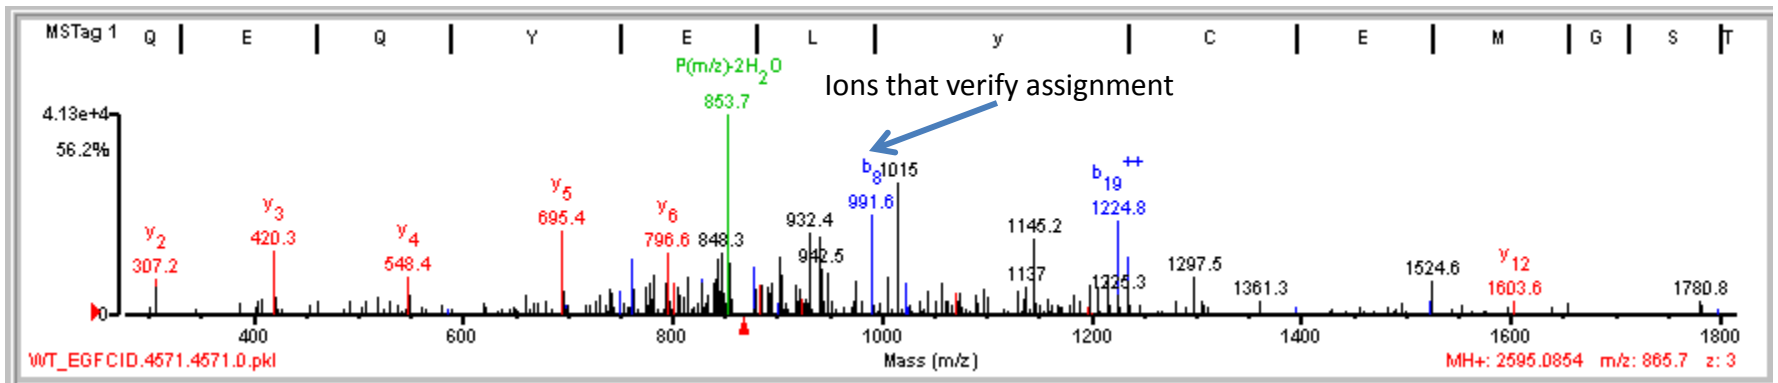

| Rank | Score | SPI (%) | BCS | # Unmatched Ions | Variable sites | Sequence                                        | MH+ Calculated (Da) | MH+ Error (Da) | MH+ Error (ppm) | Protein MW/pl (Da) | Species      | Accession #              | MS-Digest Index #     | Protein Name                                                   |
|------|-------|---------|-----|------------------|----------------|-------------------------------------------------|---------------------|----------------|-----------------|--------------------|--------------|--------------------------|-----------------------|----------------------------------------------------------------|
| 1    | 12.81 | 68.1    | 13  | 7/24             | Y363y          | (K) V T Q E Q/Y E\L\Y\C E\M\G S/T/E/Q/L\C\K (I) | 2514.10             | 80.9869        | 393.3           | 109450.4/8.15      | Homo sapiens | <a href="#">54112420</a> | <a href="#">20278</a> | Cas-Br-M (murine) ecotropic retroviral transforming sequence b |
| 1    | 12.81 | 68.1    | 13  | 7/24             | Y371y          | (K) V T Q E Q/Y E\L\Y\C E\M\G S/T/E/Q/L\C\K (I) | 2514.10             | 80.9869        | 393.3           | 99633.4/6.10       | Homo sapiens | <a href="#">52426745</a> | <a href="#">29140</a> | Cas-Br-M (murine) ecotropic retroviral transforming sequence   |

| Fragment-ion (m/z)     | 307.21         | 420.31         | 548.39         | 695.36         | 762.45                         | 793.13 | 796.65         | 828.09                         | 843.22 | 847.42                                           | 855.86                         | 878.31         | 883.64         | 891.51 | 903.31 | 932.43 | 941.40 | 991.60         | 1005.61                       | 1014.96 | 1145.23                        | 1215.47                                          | 1224.78                        | 1234.41        |
|------------------------|----------------|----------------|----------------|----------------|--------------------------------|--------|----------------|--------------------------------|--------|--------------------------------------------------|--------------------------------|----------------|----------------|--------|--------|--------|--------|----------------|-------------------------------|---------|--------------------------------|--------------------------------------------------|--------------------------------|----------------|
| Frac. Inten.(% of TIC) | 2.99           | 3.73           | 3.37           | 5.01           | 4.00                           | 2.61   | 3.43           | 3.15                           | 2.69   | 5.17                                             | 3.14                           | 2.51           | 3.79           | 2.54   | 3.46   | 3.71   | 6.87   | 5.55           | 2.90                          | 10.00   | 5.45                           | 3.81                                             | 5.89                           | 4.23           |
| Rel. Inten.(% of BP)   | 29.85          | 37.27          | 33.66          | 50.07          | 39.99                          | 26.11  | 34.26          | 31.52                          | 26.90  | 51.65                                            | 31.42                          | 25.10          | 37.93          | 25.37  | 34.62  | 37.11  | 68.64  | 55.53          | 29.00                         | 100.00  | 54.51                          | 38.09                                            | 58.90                          | 42.26          |
| Score                  | 1.00           | 1.00           | 1.00           | 1.00           | 1.00                           | -0.26  | 1.00           | 1.00                           | -0.27  | 0.50                                             | 1.00                           | 1.00           | 1.00           | -0.25  | -0.35  | -0.37  | -0.69  | 1.00           | 1.00                          | -1.00   | 1.00                           | 0.50                                             | 1.00                           | 1.00           |
| Ion-type               | y <sub>2</sub> | y <sub>3</sub> | y <sub>4</sub> | y <sub>5</sub> | b <sup>+++</sup> <sub>11</sub> |        | y <sub>6</sub> | b <sup>+++</sup> <sub>12</sub> |        | b <sup>+++</sup> <sub>13</sub> -H <sub>2</sub> O | b <sup>+++</sup> <sub>13</sub> | b <sub>7</sub> | y <sub>7</sub> |        |        |        |        | b <sub>8</sub> | y <sup>++</sup> <sub>15</sub> |         | b <sup>+++</sup> <sub>18</sub> | b <sup>+++</sup> <sub>19</sub> -H <sub>2</sub> O | b <sup>+++</sup> <sub>19</sub> | b <sub>9</sub> |
| Delta Da               | 0.07           | 0.08           | 0.10           | 0.01           | 0.16                           |        | 0.25           | 0.28                           |        | 0.10                                             | -0.46                          | -0.08          | 0.21           |        |        |        |        | 0.13           | 0.71                          |         | 0.76                           | -0.01                                            | 0.30                           | -0.09          |



# Peak 364

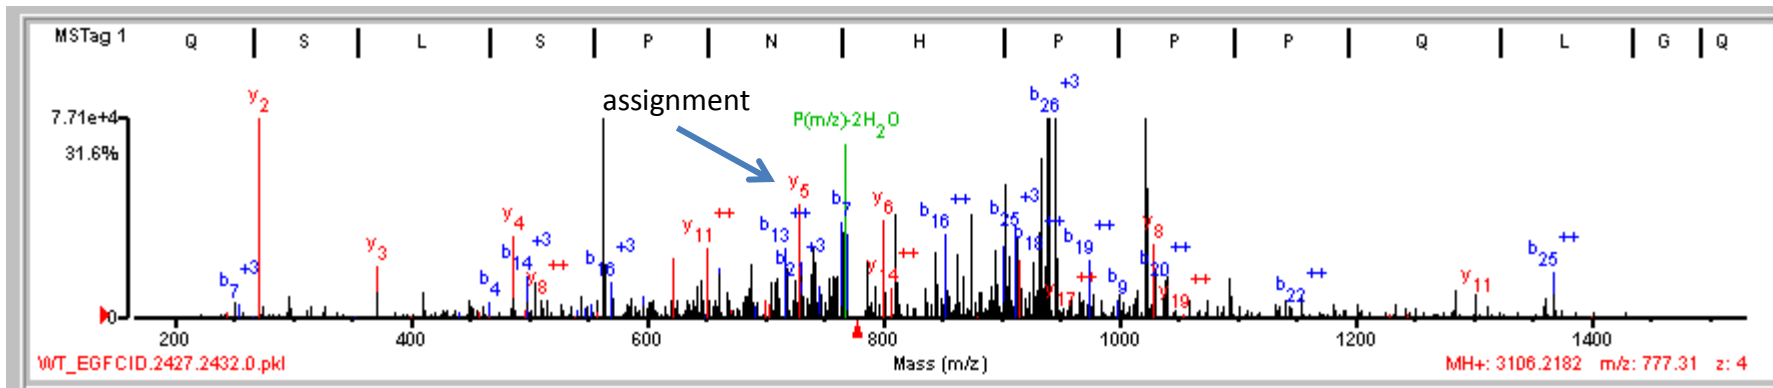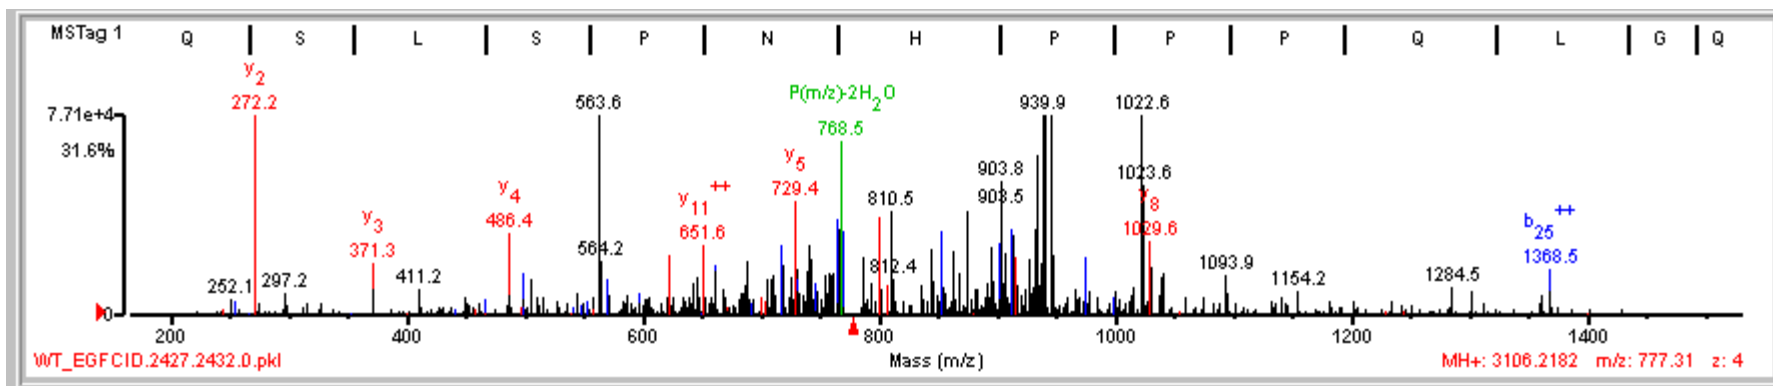

| Rank                    | Score          | SPI (%)        | BCS    | # Unmatched Ions              | # Variable sites              | Sequence                                                                  | MH <sup>+</sup> Calculated (Da) | MH <sup>+</sup> Error (Da) | MH <sup>+</sup> Error (ppm)                     | Protein MW/pl (Da)            | Species                                         | Accession #                   | MS-Digest Index #              | Protein Name                                                                |        |        |                                |                |                               |        |        |                                |         |                |
|-------------------------|----------------|----------------|--------|-------------------------------|-------------------------------|---------------------------------------------------------------------------|---------------------------------|----------------------------|-------------------------------------------------|-------------------------------|-------------------------------------------------|-------------------------------|--------------------------------|-----------------------------------------------------------------------------|--------|--------|--------------------------------|----------------|-------------------------------|--------|--------|--------------------------------|---------|----------------|
| 1                       | 12.67          | 55.8           | 13     | 8/24                          | Y317y                         | (R) H Q S L S P N R P P P Q L L A G Q L S V G L S Q N D A Y I D W P R (G) | 3025.45                         | 80.7671                    | 257.8                                           | 92861.3/6.23                  | Homo sapiens                                    | <a href="#">5453680</a>       | <a href="#">8768</a>           | neural precursor cell expressed, developmentally down-regulated 9 isoform 1 |        |        |                                |                |                               |        |        |                                |         |                |
| Fragment-ion (m/z)      | 272.21         | 486.42         | 563.62 | 660.89                        | 717.74                        | 729.37                                                                    | 741.62                          | 764.11                     | 800.48                                          | 810.51                        | 844.72                                          | 853.35                        | 874.83                         | 894.67                                                                      | 903.80 | 906.76 | 912.73                         | 915.44         | 931.64                        | 933.99 | 939.93 | 945.84                         | 1022.59 | 1029.61        |
| Frac. Inten. (% of TIC) | 3.86           | 1.94           | 4.48   | 2.09                          | 2.75                          | 2.84                                                                      | 2.64                            | 3.20                       | 2.46                                            | 3.02                          | 2.39                                            | 2.17                          | 2.83                           | 2.58                                                                        | 4.50   | 2.38   | 3.69                           | 1.78           | 2.97                          | 5.15   | 15.60  | 15.41                          | 6.89    | 2.80           |
| Rel. Inten. (% of BP)   | 24.75          | 12.44          | 28.72  | 13.38                         | 17.64                         | 16.91                                                                     | 16.91                           | 20.55                      | 15.78                                           | 19.35                         | 15.34                                           | 13.93                         | 16.87                          | 16.56                                                                       | 28.88  | 15.23  | 23.86                          | 11.31          | 19.08                         | 33.00  | 100.00 | 98.81                          | 44.16   | 17.93          |
| Score                   | 1.00           | 1.00           | -0.29  | 1.00                          | 1.00                          | 1.00                                                                      | -0.17                           | 1.00                       | 1.00                                            | 1.00                          | 0.50                                            | 1.00                          | 1.00                           | -0.17                                                                       | -0.29  | -0.15  | 1.00                           | 1.00           | 1.00                          | -0.33  | -1.00  | 1.00                           | -0.44   | 1.00           |
| Ion-type                | y <sub>2</sub> | y <sub>4</sub> |        | b <sup>++</sup> <sub>12</sub> | b <sup>++</sup> <sub>13</sub> | y <sub>5</sub>                                                            |                                 | b <sub>7</sub>             | b <sup>++</sup> <sub>15</sub> -H <sub>2</sub> O | b <sup>++</sup> <sub>15</sub> | b <sup>++</sup> <sub>16</sub> -H <sub>2</sub> O | b <sup>++</sup> <sub>16</sub> | b <sup>+++</sup> <sub>24</sub> |                                                                             |        |        | b <sup>+++</sup> <sub>25</sub> | y <sub>7</sub> | b <sup>++</sup> <sub>18</sub> |        |        | b <sup>+++</sup> <sub>25</sub> |         | y <sub>5</sub> |
| Delta Da                | 0.04           | 0.15           |        | 0.06                          | 0.37                          | 0.07                                                                      |                                 | -0.26                      | -0.42                                           | 0.60                          | 0.30                                            | -0.07                         | 0.77                           |                                                                             |        |        | 0.33                           | 0.08           | 0.17                          |        |        | 0.42                           |         | 0.21           |

# Peak 365

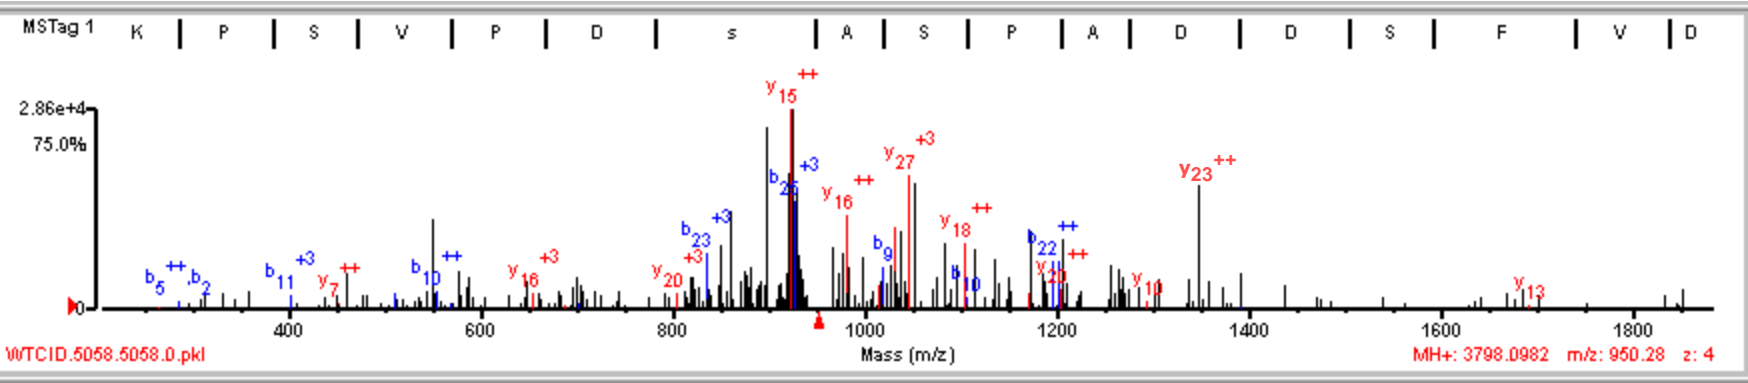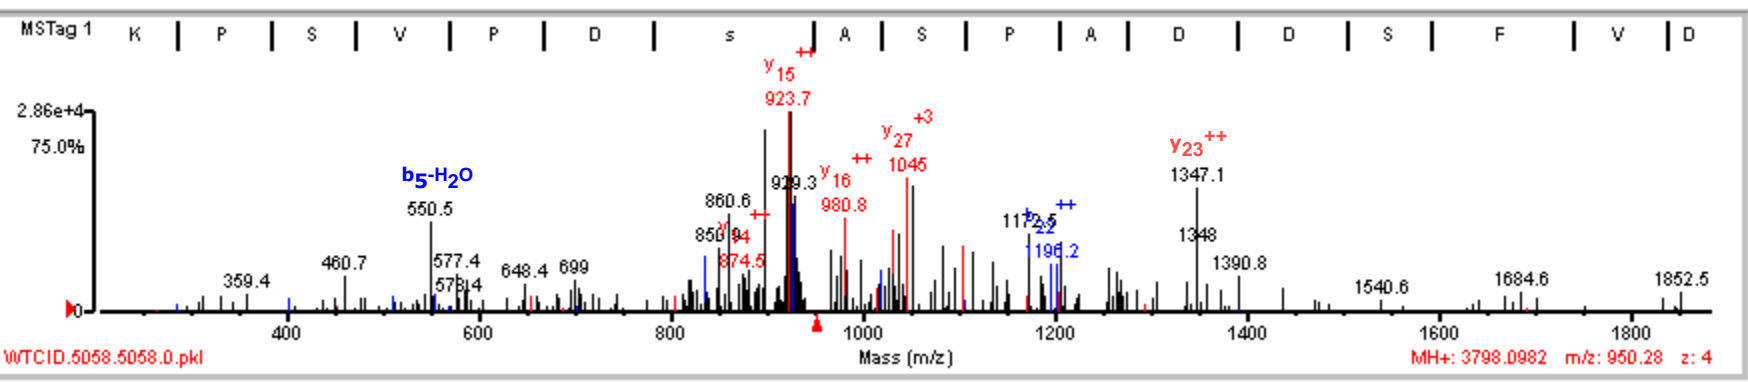

1 11.77 76.5 9 8/23 Y105y S89s (K) R K/P S V P/D s A/S/P A D D S/E/V/D I P/G E R L y D L N M P A Y V K (F) 3636.76 161.3343 369.0 42864.7/6.06 Homo sapiens [5453754](#) [17913](#) NCK adaptor protein 1

| Fragment-ion (m/z)      | 550.47                           | 834.96 | 850.87 | 860.61 | 874.51                        | 898.60                         | 911.53 | 921.43 | 923.74                        | 927.77                         | 929.31                           | 967.74                                          | 976.92                        | 980.85                        | 1030.36                       | 1037.73 | 1044.96                        | 1051.47 | 1083.41 | 1104.43                                         | 1172.49                        | 1206.31 | 1347.07                       |
|-------------------------|----------------------------------|--------|--------|--------|-------------------------------|--------------------------------|--------|--------|-------------------------------|--------------------------------|----------------------------------|-------------------------------------------------|-------------------------------|-------------------------------|-------------------------------|---------|--------------------------------|---------|---------|-------------------------------------------------|--------------------------------|---------|-------------------------------|
| Frac. Inten. (% of TIC) | 3.59                             | 3.66   | 2.20   | 3.63   | 3.87                          | 6.14                           | 2.28   | 0.20   | 24.06                         | 3.62                           | 4.31                             | 2.14                                            | 2.94                          | 3.73                          | 4.74                          | 2.65    | 4.55                           | 4.22    | 2.27    | 2.81                                            | 3.07                           | 2.57    | 6.75                          |
| Rel. Inten. (% of BP)   | 14.94                            | 15.20  | 9.15   | 15.07  | 16.08                         | 25.49                          | 9.47   | 0.84   | 100.00                        | 15.05                          | 17.90                            | 8.90                                            | 12.20                         | 15.49                         | 19.69                         | 11.01   | 18.91                          | 17.55   | 9.44    | 11.69                                           | 12.77                          | 10.66   | 28.05                         |
| Score                   | 0.50                             | -0.15  | -0.09  | -0.15  | 1.00                          | 1.00                           | -0.09  | 0.25   | 1.00                          | 1.00                           | 0.50                             | 0.50                                            | 1.00                          | 1.00                          | 1.00                          | -0.11   | 1.00                           | -0.18   | -0.09   | 1.00                                            | 1.00                           | -0.11   | 1.00                          |
| Ion-type                | b <sub>5</sub> -H <sub>2</sub> O |        |        |        | y <sup>++</sup> <sub>14</sub> | y <sup>+++</sup> <sub>23</sub> |        | st     | y <sup>++</sup> <sub>15</sub> | y <sup>+++</sup> <sub>24</sub> | b <sub>8</sub> -H <sub>2</sub> O | b <sup>++</sup> <sub>16</sub> -H <sub>2</sub> O | b <sup>++</sup> <sub>18</sub> | y <sup>++</sup> <sub>16</sub> | y <sup>++</sup> <sub>17</sub> |         | y <sup>+++</sup> <sub>27</sub> |         |         | b <sub>11</sub> -H <sub>3</sub> PO <sub>4</sub> | y <sup>+++</sup> <sub>31</sub> |         | y <sup>++</sup> <sub>23</sub> |
| Delta Da                | 0.12                             |        |        |        | -0.40                         | 0.53                           |        | 0.50   | 0.31                          | 0.69                           | -0.11                            | 0.32                                            | 0.49                          | -0.10                         | -0.12                         |         | 0.19                           |         |         | -0.15                                           | 0.98                           |         | 0.47                          |
|                         |                                  |        |        |        |                               |                                |        |        |                               |                                |                                  |                                                 |                               |                               |                               |         |                                |         |         | y <sup>++</sup> <sub>18</sub>                   |                                |         |                               |
|                         |                                  |        |        |        |                               |                                |        |        |                               |                                |                                  |                                                 |                               |                               |                               |         |                                |         |         | 0.41                                            |                                |         |                               |

# Peak 366

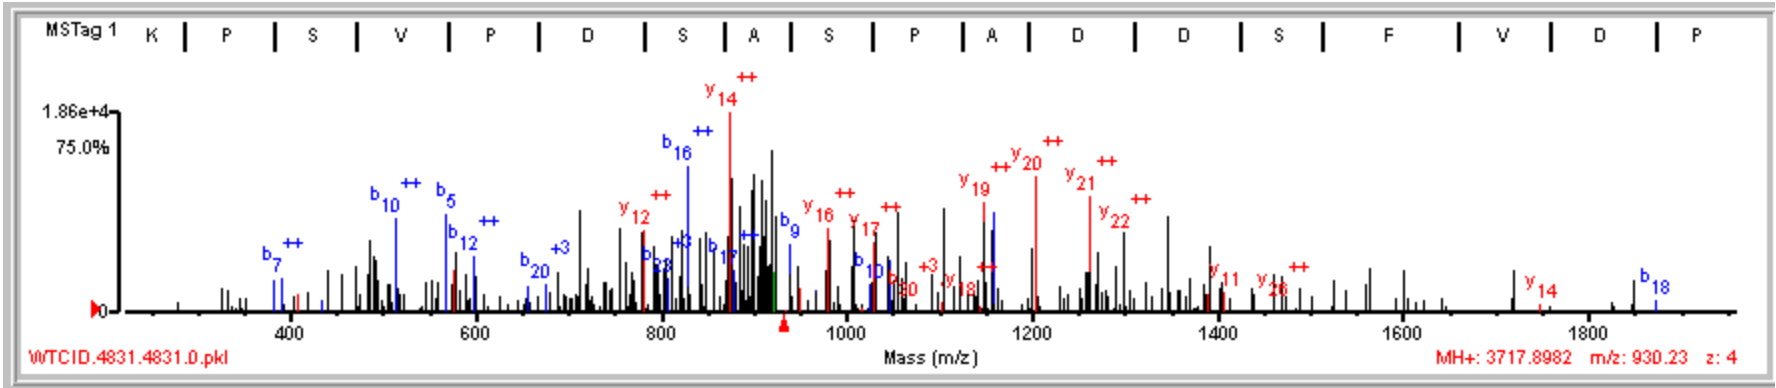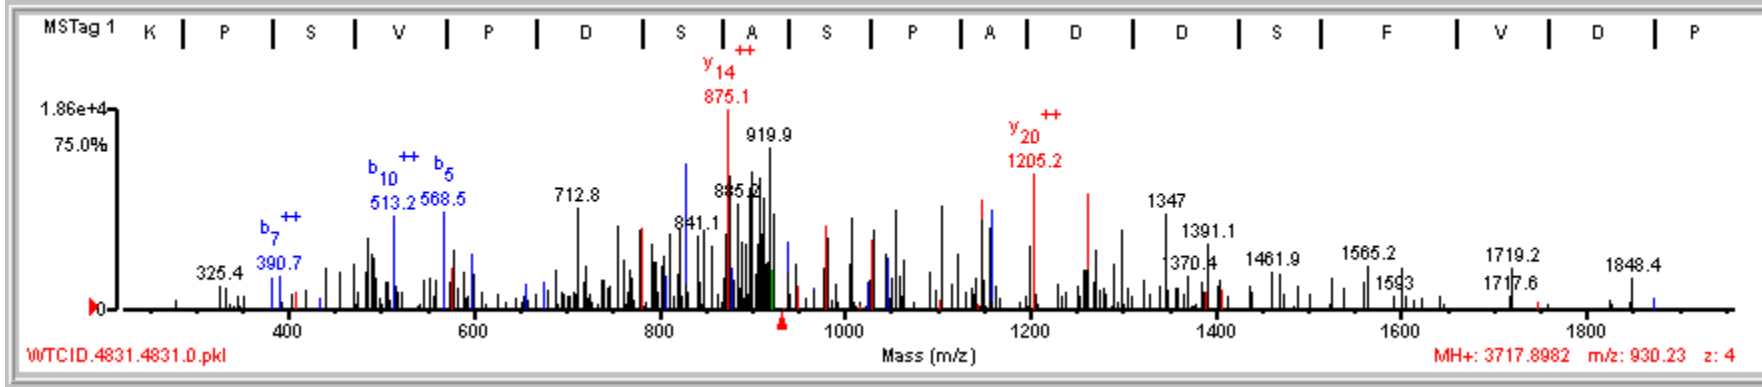

| Rank | Score | SPI (%) | BCS | # Unmatched Ions | Variable sites | Sequence                                                                       | MH <sup>+</sup> Calculated (Da) | MH <sup>+</sup> Error (Da) | MH <sup>+</sup> Error (ppm) | Protein MW/pl (Da) | Species      | Accession #             | MS-Digest Index #     | Protein Name          |
|------|-------|---------|-----|------------------|----------------|--------------------------------------------------------------------------------|---------------------------------|----------------------------|-----------------------------|--------------------|--------------|-------------------------|-----------------------|-----------------------|
| 1    | 12.52 | 65.5    | 10  | 9/25             | Y105y          | (K)R R K P S V P D S A S P A D D S F V D E / G E R L Y D L N M / P A Y V K (F) | 3636.76                         | 81.1343                    | 314.1                       | 42864.7/6.06       | Homo sapiens | <a href="#">5453754</a> | <a href="#">17913</a> | NCK adaptor protein 1 |

| Fragment-ion (m/z)      | 568.54         | 577.41         | 712.83                        | 793.13 | 795.27 | 829.53                        | 847.46 | 871.81 | 875.09                        | 885.21 | 893.71 | 898.58                         | 905.86 | 909.00 | 912.46         | 938.37                            | 1007.66                       | 1030.44                          | 1105.12                       | 1147.53 | 1157.08                       | 1205.25                       | 1262.62                       | 1298.19                       | 1347.05 |
|-------------------------|----------------|----------------|-------------------------------|--------|--------|-------------------------------|--------|--------|-------------------------------|--------|--------|--------------------------------|--------|--------|----------------|-----------------------------------|-------------------------------|----------------------------------|-------------------------------|---------|-------------------------------|-------------------------------|-------------------------------|-------------------------------|---------|
| Frac. Inten. (% of TIC) | 2.45           | 2.52           | 3.14                          | 3.04   | 3.32   | 4.24                          | 3.48   | 2.64   | 11.55                         | 3.30   | 3.50   | 6.35                           | 0.11   | 6.55   | 3.79           | 3.03                              | 4.47                          | 4.45                             | 2.57                          | 5.65    | 4.84                          | 4.38                          | 3.86                          | 3.91                          | 2.85    |
| Rel. Inten. (% of BP)   | 21.23          | 21.86          | 27.19                         | 26.35  | 28.74  | 36.74                         | 30.13  | 22.88  | 100.00                        | 28.61  | 30.30  | 55.01                          | 0.93   | 56.68  | 32.79          | 26.27                             | 38.75                         | 38.58                            | 22.26                         | 48.92   | 41.93                         | 37.94                         | 33.44                         | 33.84                         | 24.64   |
| Score                   | 1.00           | 1.00           | 1.00                          | -0.26  | -0.29  | 1.00                          | -0.30  | -0.23  | 1.00                          | -0.29  | -0.30  | 1.00                           | 1.50   | -0.57  | -0.33          | 1.00                              | 0.50                          | 1.00                             | 0.50                          | 1.00    | -0.42                         | 1.00                          | 1.00                          | 1.00                          | 1.00    |
| Ion-type                | b <sub>5</sub> | y <sub>5</sub> | b <sup>++</sup> <sub>14</sub> |        |        | b <sup>++</sup> <sub>16</sub> |        |        | y <sup>++</sup> <sub>14</sub> |        |        | y <sup>+++</sup> <sub>23</sub> | sty    |        | b <sub>9</sub> | b <sub>10</sub> -H <sub>2</sub> O | y <sup>++</sup> <sub>17</sub> | b <sub>11</sub> -NH <sub>3</sub> | y <sup>++</sup> <sub>19</sub> |         | y <sup>++</sup> <sub>20</sub> | y <sup>++</sup> <sub>21</sub> | y <sup>++</sup> <sub>22</sub> | y <sup>++</sup> <sub>23</sub> |         |
| Delta Da                | 0.18           | 0.08           | 0.49                          |        |        | 0.14                          |        |        | 0.18                          |        |        | 0.51                           | 0.42   |        | -0.14          | 0.13                              | -0.04                         | -0.44                            | -0.00                         |         | 0.20                          | 0.06                          | 0.11                          | 0.45                          |         |



# Peak 368

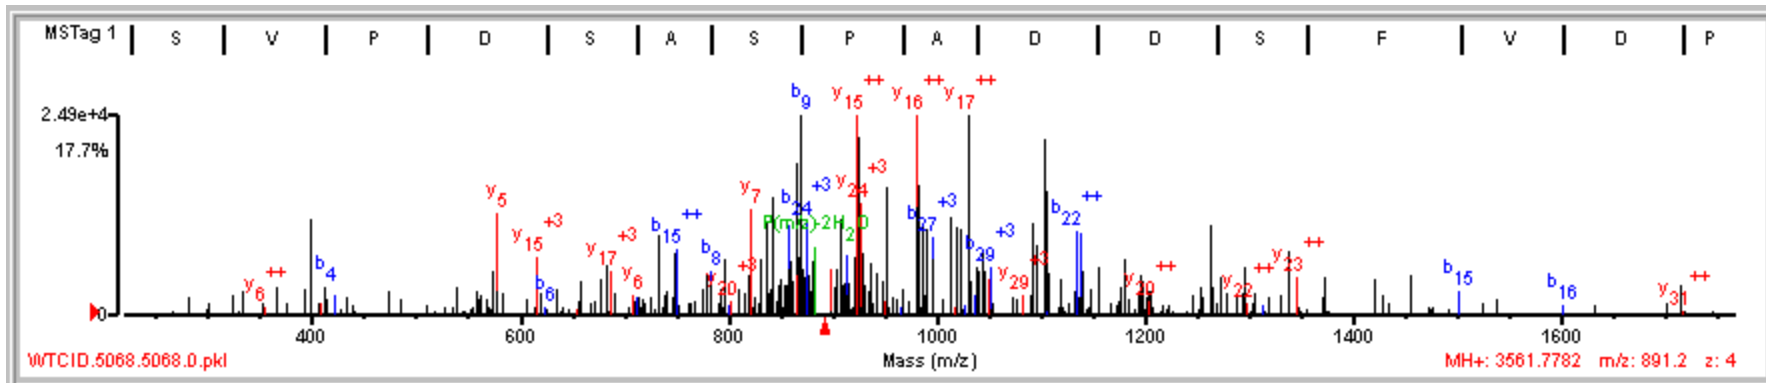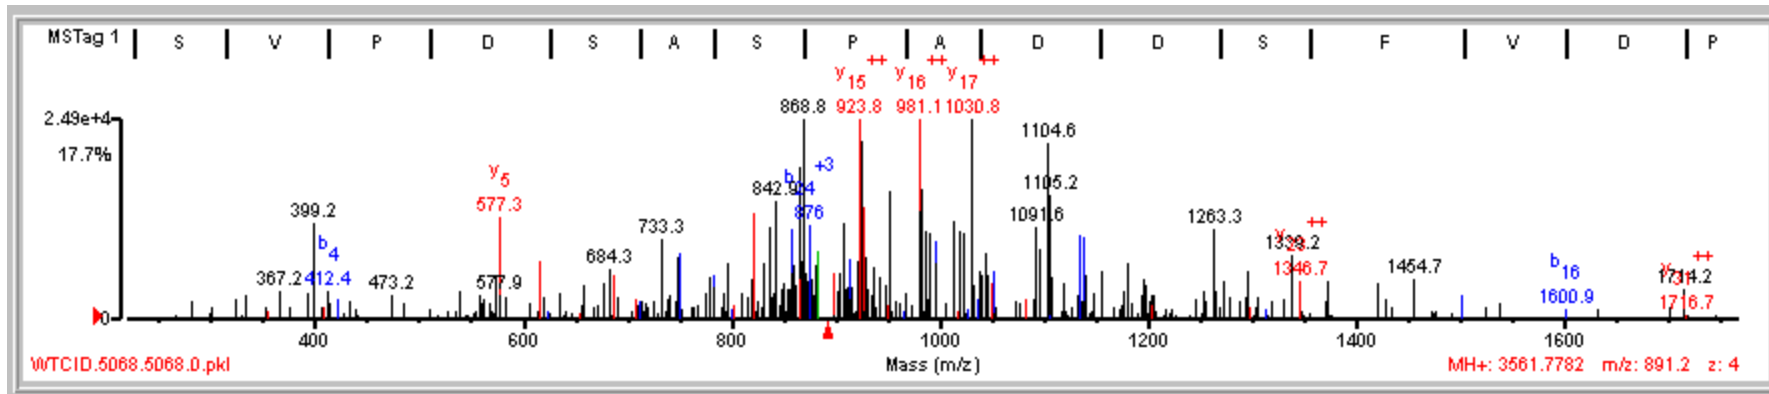

| Rank | Score | SPI (%) | BCS | # Unmatched Ions | Variable sites | Sequence                                                                   | MH* Calculated (Da) | MH* Error (Da) | MH* Error (ppm) | Protein MW/pl (Da) | Species      | Accession #             | MS-Digest Index #     | Protein Name          |
|------|-------|---------|-----|------------------|----------------|----------------------------------------------------------------------------|---------------------|----------------|-----------------|--------------------|--------------|-------------------------|-----------------------|-----------------------|
| 1    | 15.40 | 85.3    | 14  | 7/23             | Y105y          | (R)K P S V P D S A/S P A/D/D S/E/V/D I P G E R L Y/D L/N M I P A Y V K (F) | 3480.66             | 81.1154        | 322.6           | 42864.7/6.06       | Homo sapiens | <a href="#">5453754</a> | <a href="#">17913</a> | NCK adaptor protein 1 |

| Fragment-ion (m/z)      | 577.34                        | 748.79 | 822.69         | 842.91                         | 858.54                        | 865.12 | 868.84         | 876.02 | 907.53                         | 910.09 | 923.76                        | 927.48                         | 952.39                         | 981.13                        | 986.97 | 995.74                         | 1030.75                       | 1044.65 | 1050.58        | 1104.61                       | 1134.78                          | 1138.76 | 1263.31                       |
|-------------------------|-------------------------------|--------|----------------|--------------------------------|-------------------------------|--------|----------------|--------|--------------------------------|--------|-------------------------------|--------------------------------|--------------------------------|-------------------------------|--------|--------------------------------|-------------------------------|---------|----------------|-------------------------------|----------------------------------|---------|-------------------------------|
| Frac. Inten. (% of TIC) | 1.93                          | 2.12   | 1.70           | 1.67                           | 3.18                          | 3.54   | 24.68          | 1.91   | 2.27                           | 1.53   | 9.81                          | 3.04                           | 1.95                           | 7.08                          | 1.97   | 2.03                           | 16.70                         | 1.59    | 1.48           | 4.35                          | 1.48                             | 2.09    | 1.91                          |
| Rel. Inten. (% of BP)   | 7.81                          | 8.59   | 6.89           | 6.76                           | 12.86                         | 14.35  | 100.00         | 7.72   | 9.19                           | 6.19   | 39.76                         | 12.33                          | 7.88                           | 28.69                         | 7.99   | 8.23                           | 67.67                         | 6.42    | 6.01           | 17.61                         | 5.98                             | 8.47    | 7.75                          |
| Score                   | 1.00                          | -0.09  | 1.00           | 1.00                           | 1.00                          | -0.14  | 1.00           | -0.08  | 1.00                           | -0.06  | 1.00                          | 1.00                           | 1.00                           | 1.00                          | -0.08  | 1.00                           | 1.00                          | -0.06   | 1.00           | 1.00                          | 1.00                             | -0.08   | 1.00                          |
| Ion-type                | b <sup>++</sup> <sub>12</sub> |        | y <sub>7</sub> | y <sup>+++</sup> <sub>21</sub> | b <sup>++</sup> <sub>17</sub> |        | b <sub>9</sub> |        | b <sup>+++</sup> <sub>18</sub> |        | y <sup>++</sup> <sub>15</sub> | y <sup>+++</sup> <sub>24</sub> | b <sup>+++</sup> <sub>26</sub> | y <sup>++</sup> <sub>16</sub> |        | b <sup>+++</sup> <sub>27</sub> | y <sup>++</sup> <sub>17</sub> |         | y <sub>9</sub> | y <sup>++</sup> <sub>18</sub> | b <sup>++</sup> <sub>22</sub>    |         | y <sup>++</sup> <sub>21</sub> |
| Delta Da                | 0.56                          |        | 0.27           | 0.87                           | 0.15                          |        | -0.60          |        | 0.61                           |        | 0.33                          | 0.40                           | 0.63                           | 0.18                          |        | 0.30                           | 0.27                          |         | 0.05           | 0.59                          | 0.24                             |         | 0.75                          |
|                         | y <sub>5</sub>                |        |                |                                |                               |        |                |        |                                |        |                               |                                |                                |                               |        |                                |                               |         |                |                               | b <sub>12</sub> -NH <sub>3</sub> |         |                               |
|                         | 0.01                          |        |                |                                |                               |        |                |        |                                |        |                               |                                |                                |                               |        |                                |                               |         |                |                               | -0.75                            |         |                               |

# Peak 369

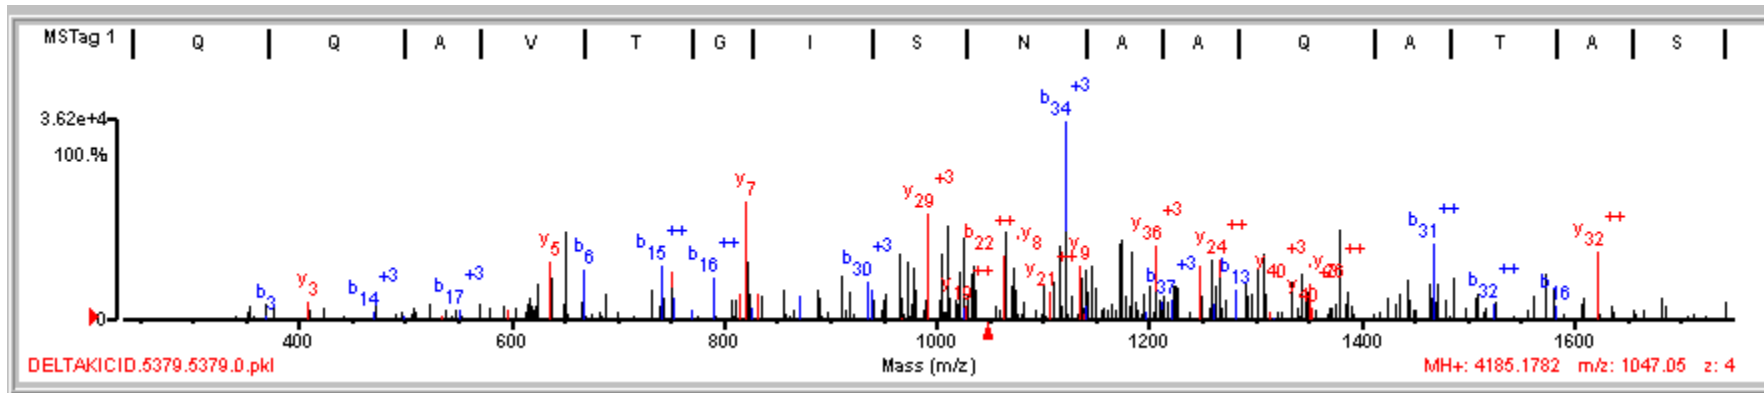

assignment

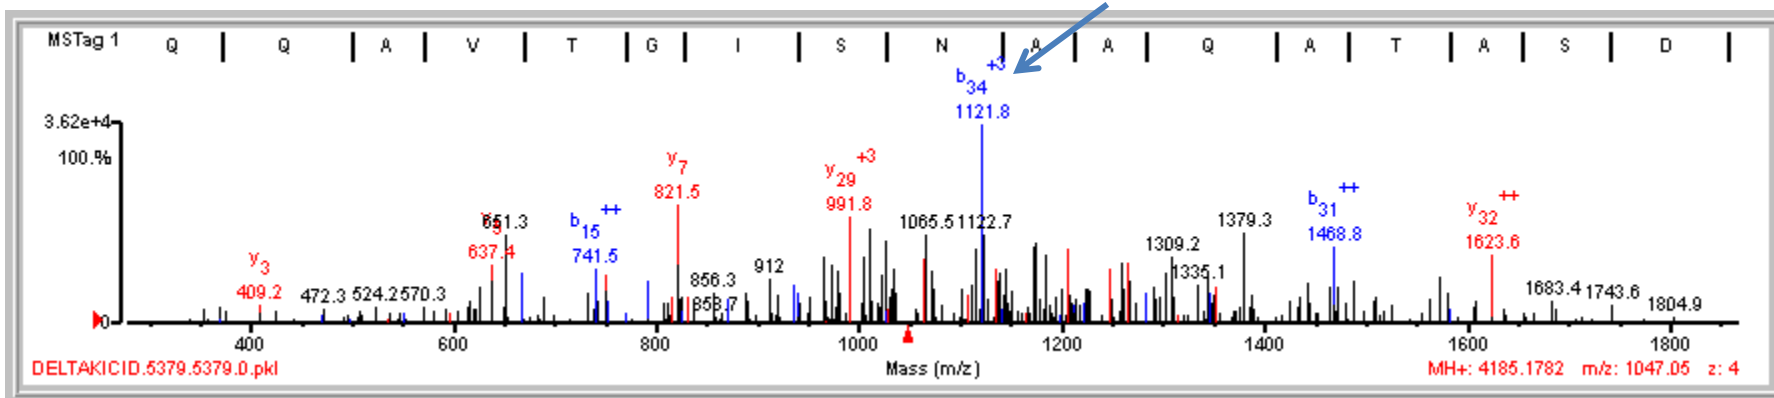

| Rank                    | Score          | SPI (%)                         | BCS                              | # Unmatched Ions | Variable sites                 | Sequence                                                                                    | MH <sup>+</sup> Calculated (Da) | MH <sup>+</sup> Error (Da) | MH <sup>+</sup> Error (ppm) | Protein MW/pl (Da)             | Species                       | Accession #                       | MS-Digest Index # | Protein Name                   |                                |                                |                                |                 |                                |                                  |                                |                                |         |                                |                               |
|-------------------------|----------------|---------------------------------|----------------------------------|------------------|--------------------------------|---------------------------------------------------------------------------------------------|---------------------------------|----------------------------|-----------------------------|--------------------------------|-------------------------------|-----------------------------------|-------------------|--------------------------------|--------------------------------|--------------------------------|--------------------------------|-----------------|--------------------------------|----------------------------------|--------------------------------|--------------------------------|---------|--------------------------------|-------------------------------|
| 1                       | 18.46          | 84.6                            | 15                               | 4/25             | Y280y                          | (K) Q L Q Q A V T G I S N A A Q A T A S D D A S Q H Q G G G G G E I L A Y A L N N F D K (Q) | 4103.93                         | 81.2492                    | 306.5                       | 100071.8/5.95                  | Homo sapiens                  | 55770844                          | 14862             | catenin, alpha 1               |                                |                                |                                |                 |                                |                                  |                                |                                |         |                                |                               |
| Fragment-ion (m/z)      | 637.37         | 651.32                          | 750.62                           | 821.53           | 979.96                         | 991.79                                                                                      | 1011.96                         | 1025.92                    | 1034.06                     | 1064.69                        | 1072.51                       | 1121.81                           | 1135.43           | 1145.96                        | 1173.37                        | 1183.67                        | 1206.22                        | 1248.52         | 1259.80                        | 1266.19                          | 1309.22                        | 1347.15                        | 1379.33 | 1468.77                        | 1623.57                       |
| Frac. Inten. (% of TIC) | 3.47           | 3.00                            | 3.50                             | 6.08             | 2.90                           | 3.66                                                                                        | 4.27                            | 3.24                       | 3.69                        | 5.88                           | 4.04                          | 10.05                             | 4.05              | 2.56                           | 5.35                           | 2.73                           | 3.48                           | 3.01            | 3.52                           | 4.84                             | 3.19                           | 3.01                           | 3.82    | 4.06                           | 2.59                          |
| Rel. Inten. (% of BP)   | 34.56          | 29.86                           | 34.88                            | 60.56            | 28.86                          | 36.39                                                                                       | 42.54                           | 32.27                      | 36.75                       | 58.55                          | 40.23                         | 100.00                            | 40.35             | 25.46                          | 53.23                          | 27.16                          | 34.65                          | 29.93           | 35.08                          | 48.17                            | 31.75                          | 29.98                          | 38.07   | 40.46                          | 25.74                         |
| Score                   | 1.00           | 0.50                            | 1.00                             | 1.00             | 1.00                           | -0.36                                                                                       | -0.43                           | 1.00                       | -0.37                       | 1.00                           | 1.00                          | 0.50                              | 1.00              | 1.00                           | 1.00                           | 1.00                           | 1.00                           | 1.00            | 1.00                           | 1.00                             | 1.00                           | 1.00                           | -0.38   | 1.00                           | 1.00                          |
| Ion-type                | y <sub>5</sub> | b <sub>6</sub> -NH <sub>3</sub> | b <sub>7</sub> -H <sub>2</sub> O | y <sub>7</sub>   | b <sup>+++</sup> <sub>31</sub> |                                                                                             |                                 | b <sub>10</sub>            |                             | b <sup>+++</sup> <sub>22</sub> | y <sup>++</sup> <sub>20</sub> | b <sub>11</sub> -H <sub>2</sub> O | y <sub>9</sub>    | b <sup>+++</sup> <sub>35</sub> | y <sup>+++</sup> <sub>35</sub> | a <sub>12</sub>                | y <sup>+++</sup> <sub>36</sub> | y <sub>10</sub> | b <sup>+++</sup> <sub>38</sub> | b <sub>13</sub> -NH <sub>3</sub> | b <sup>+++</sup> <sub>39</sub> | b <sup>++</sup> <sub>28</sub>  |         | b <sup>+++</sup> <sub>31</sub> | y <sup>++</sup> <sub>32</sub> |
| Delta Da                | 0.08           | -0.03                           |                                  | 0.11             | 0.51                           |                                                                                             |                                 | -0.64                      |                             | -0.32                          | 0.54                          | -0.78                             | -0.05             | 0.45                           | 0.52                           | 0.03                           | 0.35                           | -0.05           | 0.56                           | 0.54                             | 0.96                           | 0.02                           |         | 0.10                           | 0.38                          |
|                         |                |                                 | y <sub>6</sub>                   |                  |                                |                                                                                             |                                 |                            |                             | y <sub>8</sub>                 |                               |                                   |                   |                                |                                | b <sup>+++</sup> <sub>36</sub> |                                |                 |                                | y <sup>++</sup> <sub>24</sub>    |                                | b <sup>+++</sup> <sub>40</sub> |         |                                |                               |
|                         |                |                                 | 0.24                             |                  |                                |                                                                                             |                                 |                            |                             | 0.25                           |                               |                                   |                   |                                |                                | 0.46                           |                                |                 |                                | 0.16                             |                                | 0.55                           |         |                                |                               |

# Peak 370

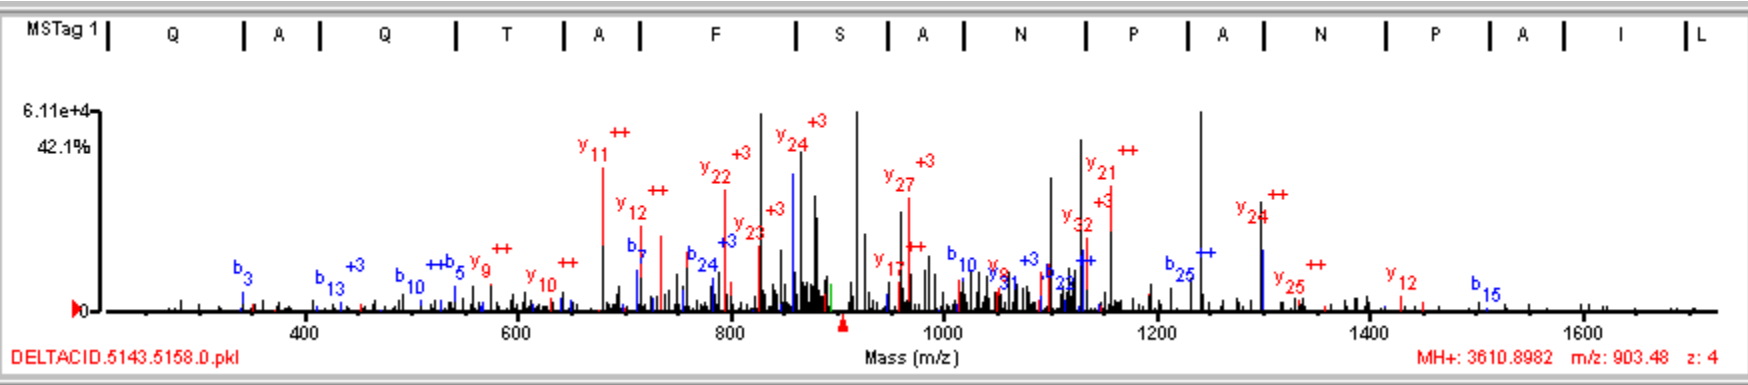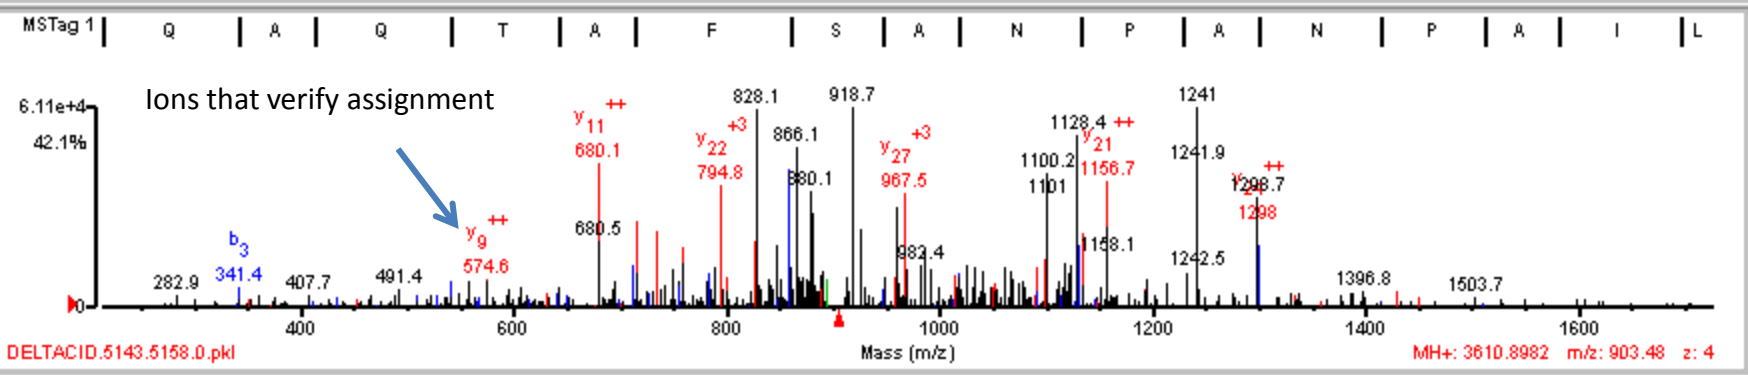

| Rank | Score | SPI (%) | BCS | # Unmatched Ions | Variable sites | Sequence                                                                    | MH <sup>+</sup> Calculated (Da) | MH <sup>+</sup> Error (Da) | MH <sup>+</sup> Error (ppm) | Protein MW/pi (Da) | Species      | Accession #              | MS-Digest Index #     | Protein Name       |
|------|-------|---------|-----|------------------|----------------|-----------------------------------------------------------------------------|---------------------------------|----------------------------|-----------------------------|--------------------|--------------|--------------------------|-----------------------|--------------------|
| 1    | 18.91 | 83.2    | 15  | 5/25             | Y46y           | (K) V I/Q A/Q T/A/F/S A/N/P A/N/P A I/L S/E/A/S/A/P I/P H D G N L Y P R (L) | 3530.80                         | 80.0955                    | 35.8                        | 32444.6/7.06       | Homo sapiens | <a href="#">56243522</a> | <a href="#">1509</a>  | syntenin isoform 1 |
| 1    | 18.91 | 83.2    | 15  | 5/25             | Y46y           | (K) V I/Q A/Q T/A/F/S A/N/P A/N/P A I/L S/E/A/S/A/P I/P H D G N L Y P R (L) | 3530.80                         | 80.0955                    | 35.8                        | 32316.4/7.06       | Homo sapiens | <a href="#">55749515</a> | <a href="#">17431</a> | syntenin isoform 3 |
| 1    | 18.91 | 83.2    | 15  | 5/25             | Y46y           | (K) V I/Q A/Q T/A/F/S A/N/P A/N/P A I/L S/E/A/S/A/P I/P H D G N L Y P R (L) | 3530.80                         | 80.0955                    | 35.8                        | 32444.6/7.06       | Homo sapiens | <a href="#">55749490</a> | <a href="#">22158</a> | syntenin isoform 1 |
| 1    | 18.91 | 83.2    | 15  | 5/25             | Y46y           | (K) V I/Q A/Q T/A/F/S A/N/P A/N/P A I/L S/E/A/S/A/P I/P H D G N L Y P R (L) | 3530.80                         | 80.0955                    | 35.8                        | 32316.4/7.06       | Homo sapiens | <a href="#">55749523</a> | <a href="#">31735</a> | syntenin isoform 3 |

| Fragment-ion (m/z)      | 574.63           | 680.11            | 715.45            | 759.22            | 794.84            | 828.07             | 846.44 | 859.48             | 865.71             | 880.12 | 918.71             | 959.39             | 967.48             | 986.04 | 991.31             | 1017.80         | 1067.78            | 1090.87                             | 1100.23           | 1128.37 | 1133.90            | 1156.69           | 1241.05           | 1298.04           | 1298.67 |
|-------------------------|------------------|-------------------|-------------------|-------------------|-------------------|--------------------|--------|--------------------|--------------------|--------|--------------------|--------------------|--------------------|--------|--------------------|-----------------|--------------------|-------------------------------------|-------------------|---------|--------------------|-------------------|-------------------|-------------------|---------|
| Frac. Inten. (% of TIC) | 1.62             | 4.05              | 2.83              | 2.22              | 2.70              | 5.01               | 2.40   | 4.64               | 8.35               | 4.37   | 8.01               | 2.77               | 3.57               | 1.68   | 1.68               | 1.71            | 1.68               | 1.58                                | 4.82              | 4.78    | 2.37               | 6.53              | 15.47             | 1.57              | 3.59    |
| Rel. Inten. (% of BP)   | 10.45            | 26.15             | 18.32             | 14.34             | 17.44             | 32.40              | 15.52  | 29.96              | 53.98              | 28.26  | 51.78              | 17.88              | 23.08              | 10.84  | 10.85              | 11.08           | 10.88              | 10.21                               | 31.15             | 30.87   | 15.33              | 42.22             | 100.00            | 10.13             | 23.19   |
| Score                   | 1.00             | 1.00              | 1.00              | 1.00              | 1.00              | 1.00               | -0.16  | 1.00               | 1.00               | -0.28  | 1.00               | 1.00               | 1.00               | 1.00   | 1.00               | 1.00            | 1.00               | 1.00                                | 1.00              | -0.31   | 1.00               | 1.00              | 1.00              | 1.00              | -0.23   |
| Ion-type                | y <sup>++9</sup> | y <sup>++11</sup> | y <sup>++12</sup> | y <sup>++13</sup> | y <sup>++14</sup> | y <sup>+++23</sup> |        | b <sub>8</sub>     | y <sup>+++24</sup> |        | a <sub>9</sub>     | y <sup>+++17</sup> | y <sup>+++27</sup> |        | y <sup>+++28</sup> | b <sub>10</sub> | y <sup>+++30</sup> | b <sup>++22</sup>                   | y <sup>++20</sup> |         | y <sup>+++32</sup> | y <sup>++21</sup> | y <sup>++23</sup> | y <sup>++24</sup> |         |
| Delta Da                | -0.12            | 0.29              | 0.12              | 0.37              | 0.47              | 0.67               |        |                    | 0.01               | 0.29   | 0.21               | 0.44               | 0.35               |        | 0.50               | 0.26            | 0.60               | -0.69                               | 0.69              |         | 0.36               | 0.13              | 0.45              | 0.42              |         |
|                         |                  |                   |                   |                   |                   |                    |        | y <sup>+++15</sup> |                    |        | y <sup>+++26</sup> |                    |                    |        |                    |                 |                    | y <sup>++20</sup> -H <sub>2</sub> O |                   |         |                    |                   |                   |                   |         |
|                         |                  |                   |                   |                   |                   |                    |        | 0.59               |                    |        | 0.60               |                    |                    |        |                    |                 |                    | 0.34                                |                   |         |                    |                   |                   |                   |         |

# Peak 371

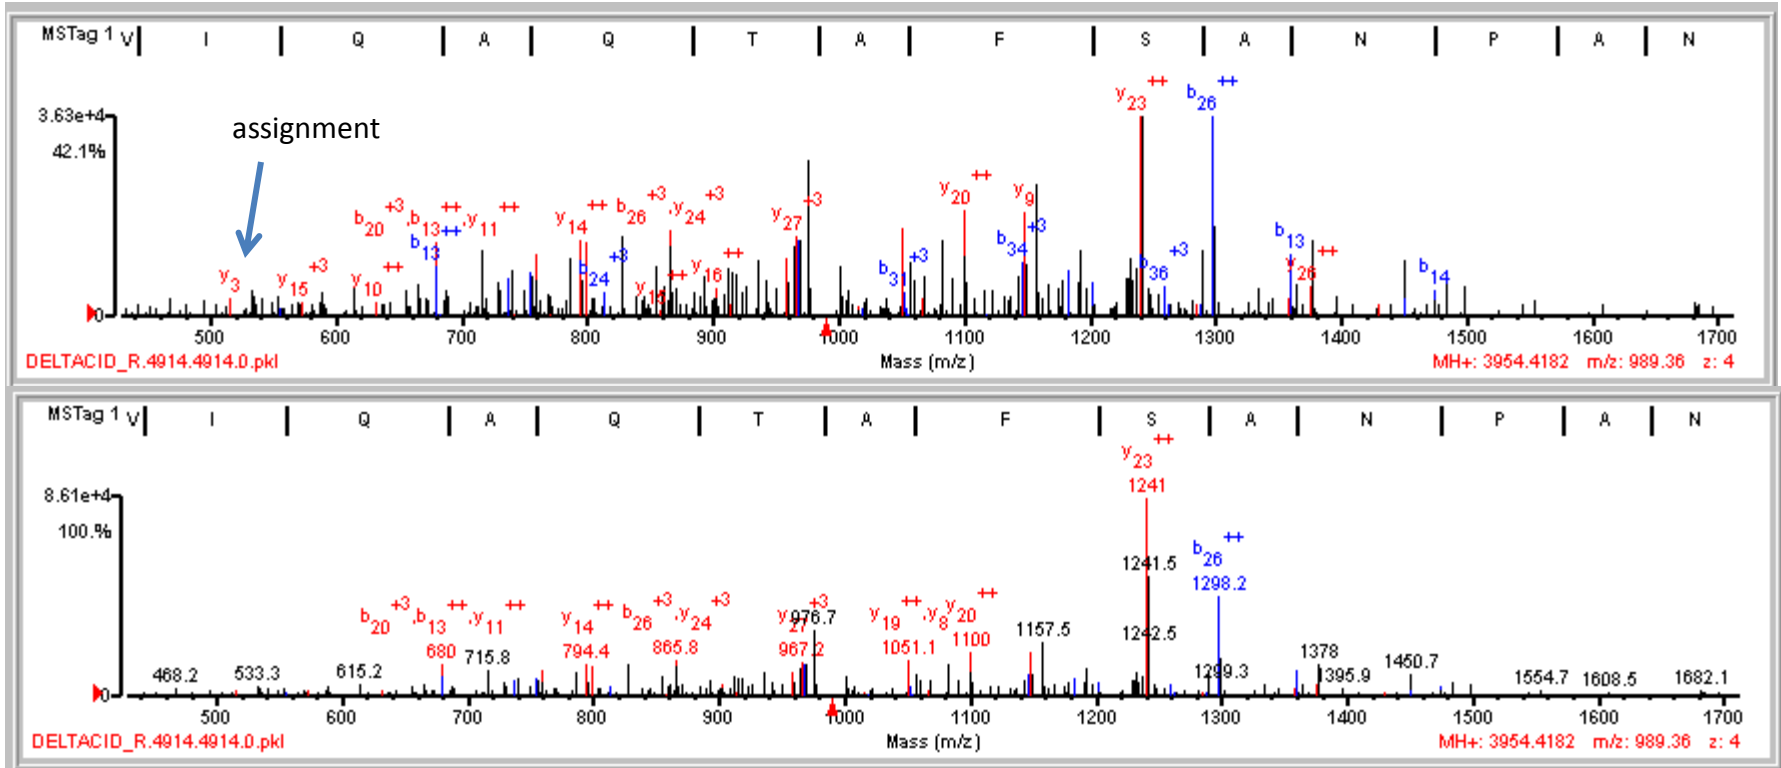

| Rank | Score | SPI (%) | BCS | # Unmatched Ions | Variable sites | Sequence                                                                                              | MH <sup>+</sup> Calculated (Da) | MH <sup>+</sup> Error (Da) | MH <sup>+</sup> Error (ppm) | Protein MW/pl (Da) | Species      | Accession #              | MS-Digest Index #     | Protein Name       |
|------|-------|---------|-----|------------------|----------------|-------------------------------------------------------------------------------------------------------|---------------------------------|----------------------------|-----------------------------|--------------------|--------------|--------------------------|-----------------------|--------------------|
| 1    | 17.74 | 82.7    | 15  | 5/24             | Y46y           | (K) V D / K V I Q A \ Q T A / F S A I N / P A N / P A I L S E I A / S A P I P / H D / G N L Y P R (L) | 3872.99                         | 81.4252                    | 368.9                       | 32444.6/7.06       | Homo sapiens | <a href="#">56243522</a> | <a href="#">1509</a>  | syntenin isoform 1 |
| 1    | 17.74 | 82.7    | 15  | 5/24             | Y46y           | (K) V D / K V I Q A \ Q T A / F S A I N / P A N / P A I L S E I A / S A P I P / H D / G N L Y P R (L) | 3872.99                         | 81.4252                    | 368.9                       | 32316.4/7.06       | Homo sapiens | <a href="#">55749515</a> | <a href="#">17431</a> | syntenin isoform 3 |
| 1    | 17.74 | 82.7    | 15  | 5/24             | Y46y           | (K) V D / K V I Q A \ Q T A / F S A I N / P A N / P A I L S E I A / S A P I P / H D / G N L Y P R (L) | 3872.99                         | 81.4252                    | 368.9                       | 32444.6/7.06       | Homo sapiens | <a href="#">55749490</a> | <a href="#">22158</a> | syntenin isoform 1 |
| 1    | 17.74 | 82.7    | 15  | 5/24             | Y46y           | (K) V D / K V I Q A \ Q T A / F S A I N / P A N / P A I L S E I A / S A P I P / H D / G N L Y P R (L) | 3872.99                         | 81.4252                    | 368.9                       | 32316.4/7.06       | Homo sapiens | <a href="#">55749523</a> | <a href="#">31735</a> | syntenin isoform 3 |

  

| Fragment-ion (m/z)      | 679.97             | 715.82            | 754.57         | 758.94             | 794.38             | 799.45         | 827.87             | 865.82                          | 959.21            | 967.20                          | 969.66 | 976.70 | 1051.06           | 1099.96           | 1148.67        | 1157.52 | 1182.99                             | 1192.52            | 1232.61 | 1241.01           | 1247.49            | 1298.17           | 1378.05 | 1450.69           |
|-------------------------|--------------------|-------------------|----------------|--------------------|--------------------|----------------|--------------------|---------------------------------|-------------------|---------------------------------|--------|--------|-------------------|-------------------|----------------|---------|-------------------------------------|--------------------|---------|-------------------|--------------------|-------------------|---------|-------------------|
| Frac. Inten. (% of TIC) | 3.14               | 2.39              | 2.37           | 2.49               | 2.21               | 1.95           | 2.58               | 4.61                            | 2.71              | 4.00                            | 2.24   | 4.66   | 2.97              | 6.19              | 4.13           | 5.88    | 2.14                                | 2.86               | 2.42    | 22.69             | 2.06               | 9.11              | 2.14    | 2.06              |
| Rel. Inten. (% of BP)   | 13.85              | 10.54             | 10.46          | 10.99              | 9.73               | 8.59           | 11.35              | 20.31                           | 11.94             | 17.62                           | 9.89   | 20.54  | 13.11             | 27.28             | 18.21          | 25.92   | 9.44                                | 12.62              | 10.66   | 100.00            | 9.09               | 40.16             | 9.43    | 9.07              |
| Score                   | 1.00               | 1.00              | 1.00           | 1.00               | 1.00               | 1.00           | 1.00               | 1.00                            | 1.00              | 1.00                            | 0.50   | -0.10  | 1.00              | 1.00              | 1.00           | -0.26   | 1.00                                | 1.00               | -0.11   | 1.00              | 1.00               | 1.00              | -0.09   | 1.00              |
| Ion-type                | b <sup>++13</sup>  | y <sup>++12</sup> | b <sub>7</sub> | y <sup>+++13</sup> | y <sup>+++14</sup> | y <sub>6</sub> | y <sup>+++23</sup> | b <sub>9</sub> -NH <sub>3</sub> | y <sup>++17</sup> | b <sub>9</sub> -NH <sub>3</sub> |        |        | y <sub>8</sub>    | y <sup>++20</sup> | y <sub>9</sub> |         | b <sup>++23</sup>                   | y <sup>+++22</sup> |         | y <sup>++23</sup> | y <sup>+++35</sup> | b <sup>++26</sup> |         | y <sup>++27</sup> |
| Delta Da                | -0.40              | 0.49              | 0.12           | 0.09               | 0.01               | 0.10           | 0.47               | 0.34                            | 0.26              | 0.67                            |        |        | -0.38             | 0.42              | 0.18           |         | -0.63                               | 0.44               |         | 0.41              | 0.53               | -0.00             |         | 0.50              |
|                         | b <sup>+++20</sup> |                   |                |                    |                    |                |                    | y <sup>+++24</sup>              |                   |                                 |        |        | y <sup>++19</sup> |                   |                |         | b <sub>11</sub> -H <sub>2</sub> O   |                    |         |                   |                    | y <sup>++24</sup> |         |                   |
|                         | 0.27               |                   |                |                    |                    |                |                    | 0.40                            |                   |                                 |        |        | 0.05              |                   |                |         | -0.66                               |                    |         |                   |                    | 0.55              |         |                   |
|                         | y <sup>++11</sup>  |                   |                |                    |                    |                |                    |                                 |                   |                                 |        |        |                   |                   |                |         | y <sup>++22</sup> -H <sub>2</sub> O |                    |         |                   |                    |                   |         |                   |
|                         | 0.15               |                   |                |                    |                    |                |                    |                                 |                   |                                 |        |        |                   |                   |                |         | -0.08                               |                    |         |                   |                    |                   |         |                   |



# Peak 373

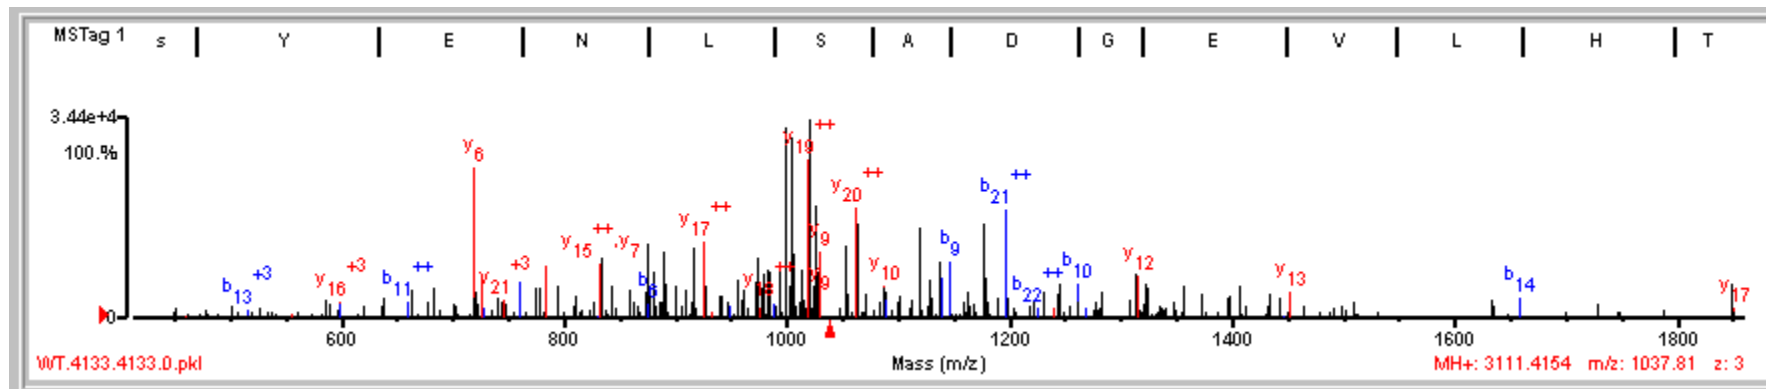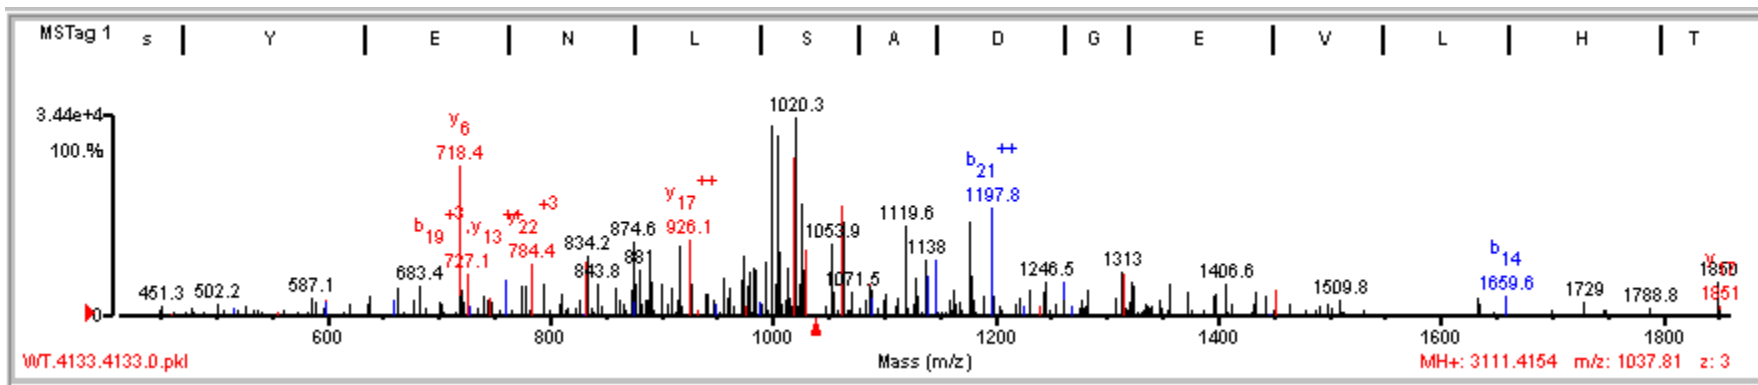

| 1                      | 19.15          | 94.9                          | 12                            | 1/24           | Y354y S332s                                    | (R)W D s Y E/N L/S/A D/G E/V/L H/T Q G/P V/D G S L y A K (V) | 2951.37                       | 160.0461 | 36.5                          | 155266.4/6.34 | Homo sapiens | <a href="#">65288071</a> | <a href="#">34966</a>         | tensin 3                      |                |                                                 |                               |                 |                               |                                 |                |                                  |                               |                 |
|------------------------|----------------|-------------------------------|-------------------------------|----------------|------------------------------------------------|--------------------------------------------------------------|-------------------------------|----------|-------------------------------|---------------|--------------|--------------------------|-------------------------------|-------------------------------|----------------|-------------------------------------------------|-------------------------------|-----------------|-------------------------------|---------------------------------|----------------|----------------------------------|-------------------------------|-----------------|
| Fragment-ion (m/z)     | 718.36         | 783.66                        | 833.20                        | 874.65         | 890.57                                         | 917.10                                                       | 926.08                        | 973.57   | 984.11                        | 993.91        | 999.76       | 1005.63                  | 1013.87                       | 1019.14                       | 1029.35        | 1053.87                                         | 1062.64                       | 1086.75         | 1119.56                       | 1129.37                         | 1146.27        | 1176.56                          | 1197.77                       | 1314.91         |
| Frac. Inten.(% of TIC) | 6.25           | 3.33                          | 4.22                          | 3.23           | 4.82                                           | 4.94                                                         | 4.57                          | 5.10     | 3.68                          | 0.12          | 0.21         | 0.27                     | 3.96                          | 14.41                         | 3.24           | 3.99                                            | 10.03                         | 2.56            | 4.29                          | 2.31                            | 2.14           | 4.62                             | 5.19                          | 2.52            |
| Rel. Inten.(% of BP)   | 43.38          | 23.09                         | 29.27                         | 22.42          | 33.42                                          | 34.31                                                        | 31.71                         | 35.41    | 25.54                         | 0.85          | 1.49         | 1.91                     | 27.46                         | 100.00                        | 22.47          | 27.67                                           | 69.63                         | 17.74           | 29.78                         | 16.02                           | 14.86          | 32.09                            | 36.02                         | 17.49           |
| Score                  | 1.00           | 1.00                          | 1.00                          | 1.00           | 0.25                                           | 0.50                                                         | 1.00                          | -0.35    | 1.00                          | 1.00          | 0.25         | 1.50                     | 1.00                          | 1.00                          | 1.00           | 0.50                                            | 1.00                          | 1.00            | 1.00                          | 0.50                            | 1.00           | 1.00                             | 1.00                          | 1.00            |
| Ion-type               | y <sub>6</sub> | y <sup>++</sup> <sub>14</sub> | y <sub>7</sub>                | b <sub>6</sub> | b <sub>7</sub> -H <sub>3</sub> PO <sub>4</sub> | y <sup>++</sup> <sub>17</sub> -H <sub>2</sub> O              | y <sup>++</sup> <sub>17</sub> |          | y <sup>++</sup> <sub>18</sub> | st            | st           | sty                      | b <sup>++</sup> <sub>17</sub> | y <sup>++</sup> <sub>19</sub> | y <sub>9</sub> | y <sup>++</sup> <sub>20</sub> -H <sub>2</sub> O | y <sup>++</sup> <sub>20</sub> | y <sub>10</sub> | y <sup>++</sup> <sub>21</sub> | b <sub>9</sub> -NH <sub>3</sub> | b <sub>9</sub> | y <sup>++</sup> <sub>22</sub>    | b <sup>++</sup> <sub>21</sub> | y <sub>12</sub> |
| Delta Da               | 0.04           | 0.29                          | -0.14                         | -0.61          | 0.20                                           | 0.17                                                         | 0.14                          |          | 0.66                          |               | 0.65         | 0.52                     | 0.46                          | 0.17                          | -0.12          | 0.39                                            | 0.15                          | 0.26            | 0.53                          | -0.02                           | -0.14          | 0.51                             | 0.27                          | -0.68           |
|                        |                |                               | y <sup>++</sup> <sub>15</sub> |                |                                                |                                                              |                               |          |                               |               |              |                          |                               |                               |                |                                                 |                               |                 |                               |                                 |                | y <sub>11</sub> -NH <sub>3</sub> |                               |                 |
|                        |                |                               | 0.29                          |                |                                                |                                                              |                               |          |                               |               |              |                          |                               |                               |                |                                                 |                               |                 |                               |                                 |                | 0.25                             |                               |                 |

# Peak 375

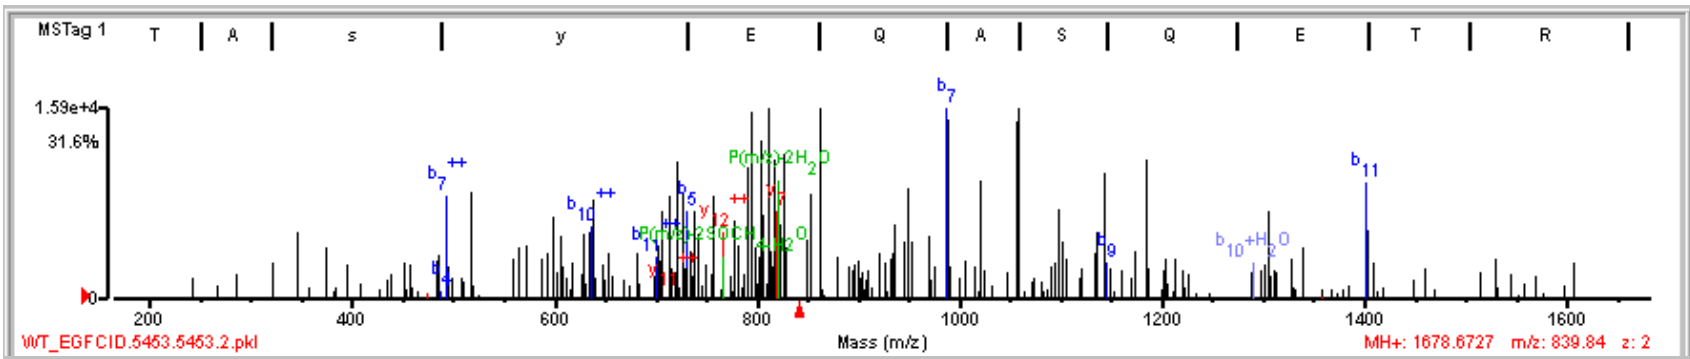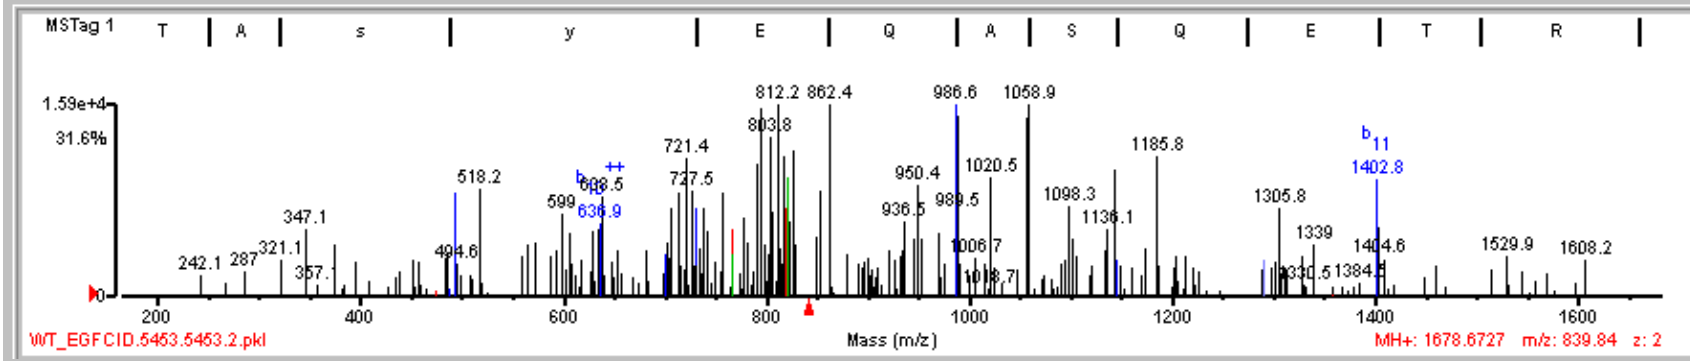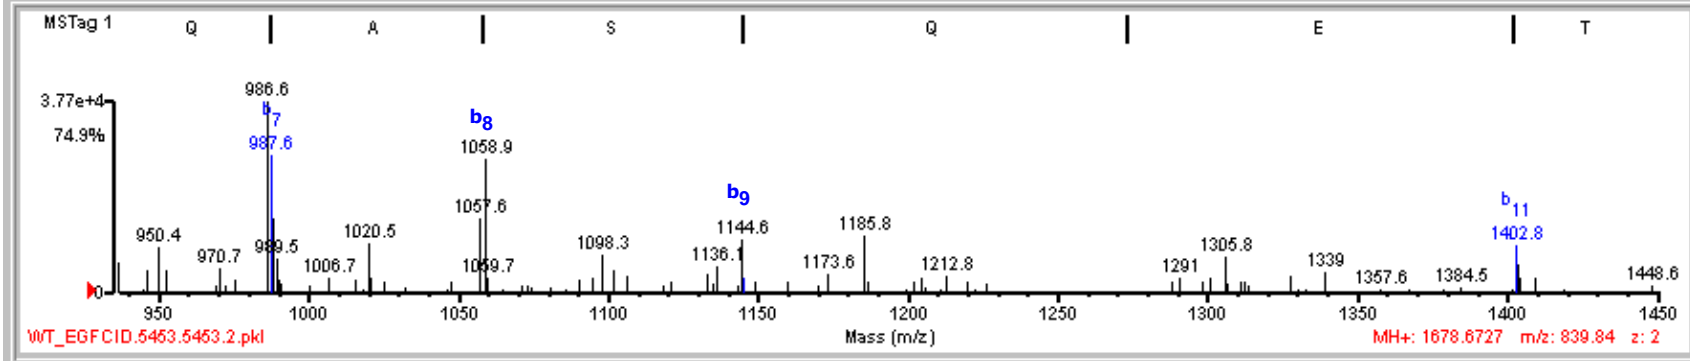

| Rank                    | Score | SPI (%)                           | BCS               | # Unmatched Ions | Variable sites                | Sequence                          | MH <sup>+</sup> Calculated (Da) | MH <sup>+</sup> Error (Da) | MH <sup>+</sup> Error (ppm) | Protein MW/pi (Da)            | Species      | Accession # | MS-Digest Index # | Protein Name                  |        |        |        |                |         |                |                |                |         |         |                 |
|-------------------------|-------|-----------------------------------|-------------------|------------------|-------------------------------|-----------------------------------|---------------------------------|----------------------------|-----------------------------|-------------------------------|--------------|-------------|-------------------|-------------------------------|--------|--------|--------|----------------|---------|----------------|----------------|----------------|---------|---------|-----------------|
| 1                       | 8.88  | 51.5                              | 7                 | 13/24            | M1310m Y1314y S1313s          | (K) m/T/A s y\E Q\A\S\Q E\T R (Q) | 1501.66                         | 177.0140                   | 647.2                       | 194852.3/8.95                 | Homo sapiens | 65507253    | 8933              | hypothetical protein LOC55196 |        |        |        |                |         |                |                |                |         |         |                 |
| Fragment-ion (m/z)      |       | 484.33                            | 494.14            | 518.25           | 714.51                        | 721.45                            | 727.48                          | 730.13                     | 765.86                      | 790.39                        | 795.19       | 803.83      | 812.15            | 817.41                        | 827.38 | 862.44 | 950.35 | 986.59         | 1020.54 | 1057.57        | 1058.94        | 1144.58        | 1185.76 | 1305.79 | 1402.77         |
| Frac. Inten. (% of TIC) |       | 2.09                              | 2.49              | 2.20             | 2.86                          | 2.74                              | 2.51                            | 2.19                       | 2.02                        | 0.09                          | 3.81         | 3.23        | 7.55              | 6.32                          | 2.67   | 7.21   | 2.02   | 22.90          | 2.89    | 3.25           | 6.57           | 3.00           | 3.27    | 2.03    | 4.09            |
| Rel. Inten. (% of BP)   |       | 9.12                              | 10.85             | 9.61             | 12.48                         | 11.98                             | 10.98                           | 9.55                       | 8.80                        | 0.40                          | 16.65        | 14.10       | 32.98             | 27.61                         | 11.65  | 31.48  | 8.81   | 100.00         | 12.62   | 14.20          | 28.68          | 13.08          | 14.27   | 8.87    | 17.86           |
| Score                   |       | 0.50                              | 1.00              | -0.10            | 1.00                          | -0.12                             | -0.11                           | 1.00                       | 1.00                        | 1.50                          | -0.17        | -0.14       | -0.33             | -0.28                         | -0.12  | -0.31  | -0.09  | 1.00           | -0.13   | 1.00           | 1.00           | 1.00           | -0.14   | -0.09   | 1.00            |
| Ion-type                |       | b <sup>++</sup> -H <sub>2</sub> O | b <sup>++</sup> - |                  | y <sup>++</sup> <sub>11</sub> |                                   |                                 |                            | b <sub>5</sub>              | y <sup>++</sup> <sub>12</sub> | sty          |             |                   |                               |        |        |        | b <sub>7</sub> |         | b <sub>8</sub> | b <sub>5</sub> | b <sub>9</sub> |         |         | b <sub>11</sub> |
| Delta Da                |       | -0.80                             | 0.01              |                  | -0.75                         |                                   |                                 |                            | -0.03                       | 0.08                          | 0.08         |             |                   |                               |        |        |        | -0.67          |         | -0.72          | 0.65           | -0.75          |         |         | 0.34            |

# Peak 376

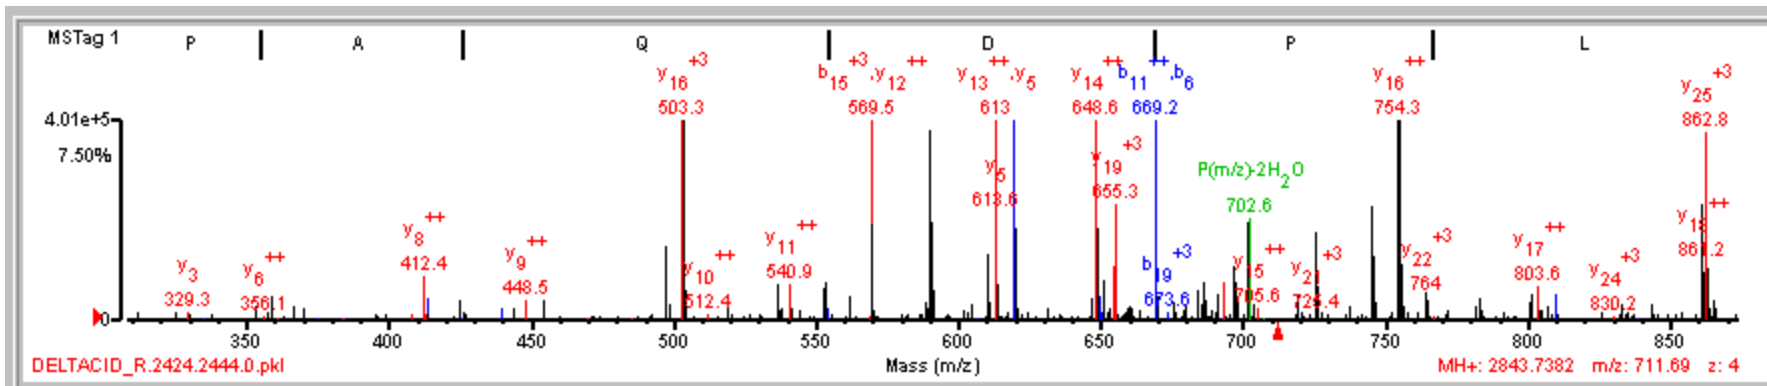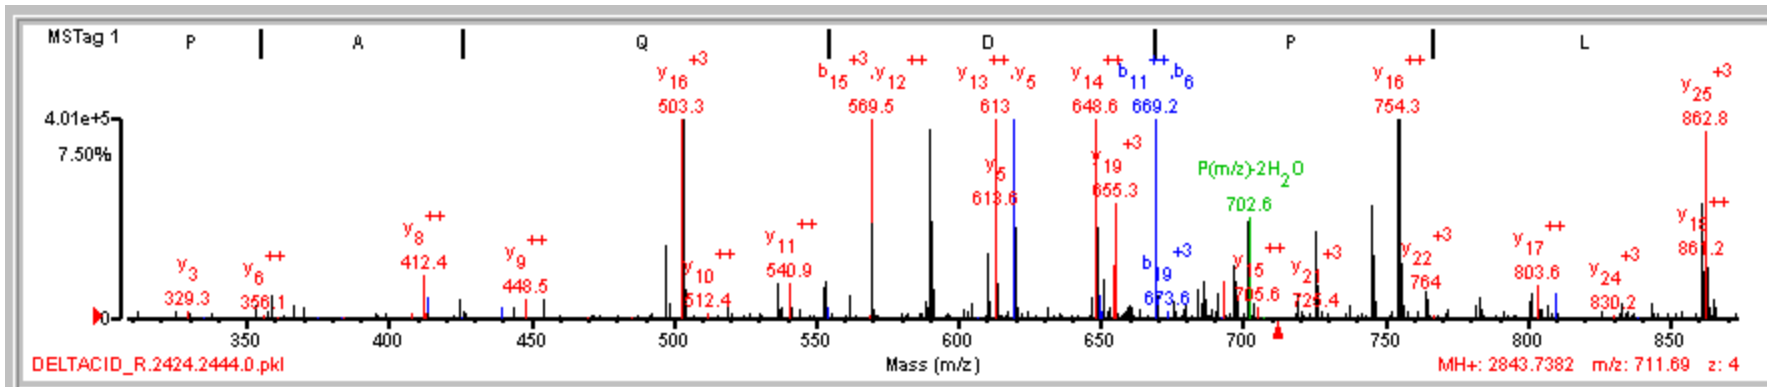

| Rank                    | Score            | SPI (%) | BCS                | # Unmatched Ions                 | Variable sites     | Sequence                                                            | MH* Calculated (Da)                  | MH* Error (Da) | MH* Error (ppm)    | Protein MW/pI (Da) | Species      | Accession #    | MS-Digest Index # | Protein Name       |                                      |                    |                                  |                                 |        |                    |                    |                                   |                    |                    |                                   |                 |
|-------------------------|------------------|---------|--------------------|----------------------------------|--------------------|---------------------------------------------------------------------|--------------------------------------|----------------|--------------------|--------------------|--------------|----------------|-------------------|--------------------|--------------------------------------|--------------------|----------------------------------|---------------------------------|--------|--------------------|--------------------|-----------------------------------|--------------------|--------------------|-----------------------------------|-----------------|
| 1                       | 18.29            | 90.7    | 11                 | 5/25                             | Y36y               | (R) E K/P A/Q D L P L Y/D I V P N/A/S I G G Q A/G G P/Q R P G R (V) | 2762.36                              | 81.3777        | 496.3              | 84099.3/8.30       | Homo sapiens | 68989256       | 16808             | ras inhibitor RIN1 |                                      |                    |                                  |                                 |        |                    |                    |                                   |                    |                    |                                   |                 |
| Fragment-ion (m/z)      | 412.35           | 497.26  | 503.27             | 536.40                           | 569.51             | 590.41                                                              | 610.44                               | 613.02         | 619.37             | 648.60             | 655.26       | 669.23         | 686.51            | 697.11             | 725.79                               | 745.55             | 754.29                           | 861.46                          | 862.83 | 980.43             | 1179.54            | 1208.51                           | 1219.59            | 1318.69            | 1336.65                           |                 |
| Frac. Inten. (% of TIC) | 0.84             | 1.60    | 11.26              | 0.82                             | 3.36               | 3.84                                                                | 0.94                                 | 3.93           | 3.73               | 3.48               | 1.33         | 3.56           | 0.02              | 1.45               | 1.40                                 | 2.05               | 43.29                            | 1.71                            | 2.73   | 1.08               | 0.79               | 1.41                              | 2.23               | 1.86               | 1.30                              |                 |
| Rel. Inten. (% of BP)   | 1.94             | 3.69    | 26.02              | 1.88                             | 7.77               | 8.88                                                                | 2.18                                 | 9.08           | 8.61               | 8.03               | 3.06         | 8.22           | 0.05              | 3.35               | 3.22                                 | 4.74               | 100.00                           | 3.94                            | 6.31   | 2.50               | 1.83               | 3.25                              | 5.15               | 4.30               | 3.01                              |                 |
| Score                   | 1.00             | -0.04   | 1.00               | 1.00                             | 1.00               | -0.09                                                               | 0.50                                 | 1.00           | 1.00               | 1.00               | -0.03        | 1.00           | 1.50              | -0.03              | 1.00                                 | 0.50               | 1.00                             | 1.00                            | 1.00   | -0.02              | 1.00               | 1.00                              | 0.50               | 0.50               | 1.00                              |                 |
| Ion-type                | y <sup>++3</sup> |         | y <sup>+++16</sup> | b <sub>5</sub> -H <sub>2</sub> O | b <sup>+++15</sup> |                                                                     | b <sup>+++10</sup> -H <sub>2</sub> O | y <sub>5</sub> | b <sup>+++10</sup> | y <sup>+++14</sup> |              | b <sub>6</sub> | sty               | y <sup>+++21</sup> | y <sup>+++16</sup> -H <sub>2</sub> O | y <sup>+++18</sup> | b <sub>8</sub> -H <sub>2</sub> O | b <sub>8</sub> -NH <sub>3</sub> |        | b <sup>+++23</sup> | y <sup>+++23</sup> | b <sub>10</sub> -H <sub>2</sub> O | b <sup>+++18</sup> | y <sup>+++25</sup> | b <sub>11</sub> -H <sub>2</sub> O | b <sub>11</sub> |
| Delta Da                | -0.38            |         | 0.35               | 0.12                             | 0.26               |                                                                     | 0.18                                 | -0.33          | 0.11               | 0.27               |              | -0.09          | -0.33             | 0.45               | 0.68                                 | 0.41               | 0.01                             | 0.40                            |        | 0.02               | -0.54              | 0.09                              | 0.12               | 0.07               |                                   |                 |



# Peak 377

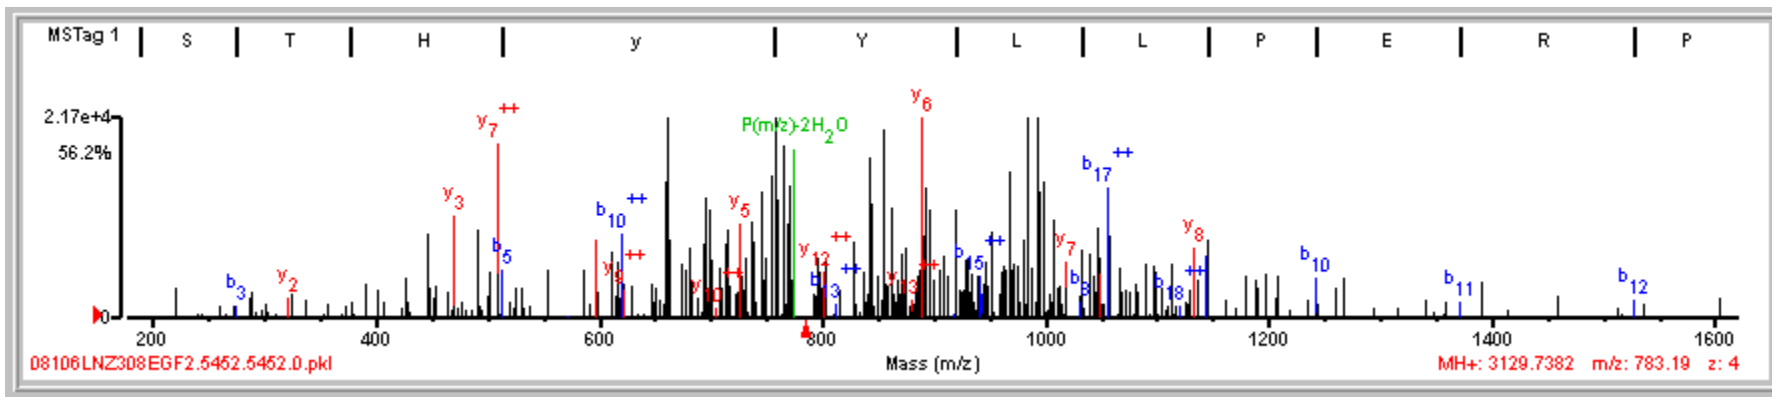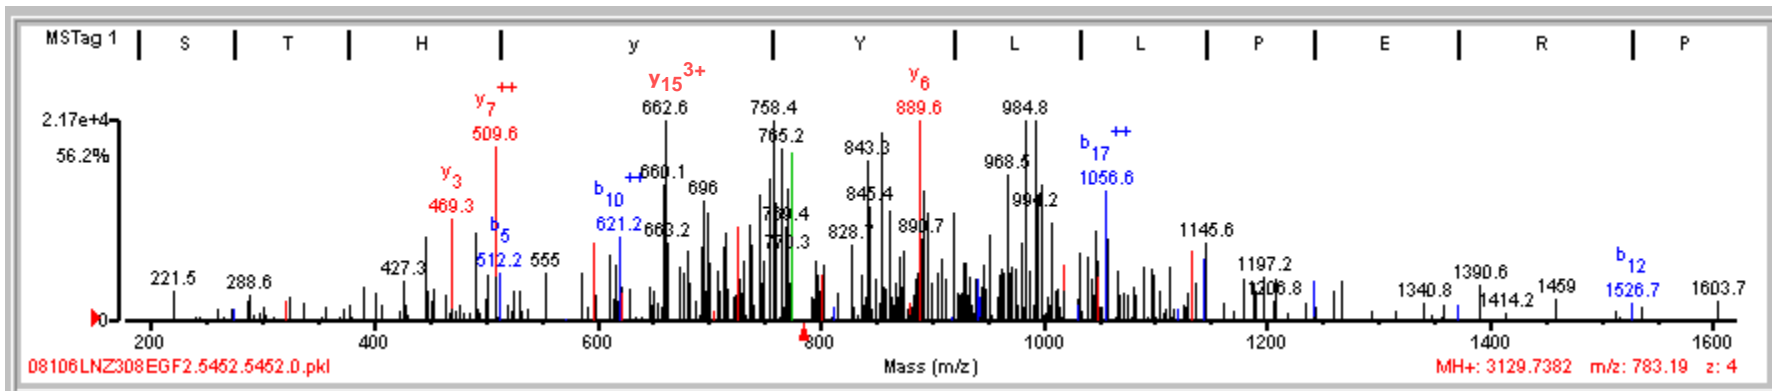

| Rank                    | Score             | SPI (%)            | BCS                | # Unmatched Ions   | Variable sites | Sequence                                                      | MH <sup>+</sup> Calculated (Da) | MH <sup>+</sup> Error (Da)       | MH <sup>+</sup> Error (ppm) | Protein MW/pl (Da) | Species      | Accession # | MS-Digest Index # | Protein Name                     |        |                |        |                    |        |        |        |                                  |                    |                    |                |
|-------------------------|-------------------|--------------------|--------------------|--------------------|----------------|---------------------------------------------------------------|---------------------------------|----------------------------------|-----------------------------|--------------------|--------------|-------------|-------------------|----------------------------------|--------|----------------|--------|--------------------|--------|--------|--------|----------------------------------|--------------------|--------------------|----------------|
| 1                       | 9.17              | 55.8               | 8                  | 12/25              | Y394y          | (K) V S S T H Y Y L L P V E R L P P Y L D I K Y E K F F R (E) | 3048.56                         | 81.1764                          | 386.6                       | 50560.3/8.38       | Homo sapiens | 10047086    | 949               | mitogen-inducible gene 6 protein |        |                |        |                    |        |        |        |                                  |                    |                    |                |
| Fragment-ion (m/z)      | 445.87            | 509.60             | 621.23             | 662.65             | 694.55         | 700.09                                                        | 714.51                          | 736.77                           | 754.21                      | 758.36             | 765.19       | 769.42      | 771.62            | 843.26                           | 855.64 | 889.57         | 896.17 | 919.56             | 968.49 | 980.41 | 984.83 | 993.71                           | 999.47             | 1056.59            | 1144.49        |
| Frac. Inten. (% of TIC) | 2.76              | 4.15               | 2.76               | 5.32               | 3.84           | 3.29                                                          | 3.66                            | 5.08                             | 2.87                        | 0.21               | 4.84         | 2.98        | 3.19              | 3.00                             | 5.58   | 7.65           | 2.85   | 2.91               | 4.23   | 2.86   | 4.30   | 11.54                            | 2.67               | 4.74               | 2.70           |
| Rel. Inten. (% of BP)   | 23.92             | 36.01              | 23.91              | 46.15              | 33.31          | 28.56                                                         | 31.77                           | 44.02                            | 24.89                       | 1.83               | 41.98        | 25.87       | 27.64             | 25.99                            | 48.38  | 66.35          | 24.73  | 25.21              | 36.63  | 24.83  | 37.29  | 100.00                           | 23.13              | 41.10              | 23.41          |
| Score                   | 1.00              | 1.00               | 1.00               | 1.00               | -0.33          | 1.00                                                          | -0.32                           | 0.50                             | -0.25                       | 1.50               | -0.42        | -0.26       | -0.28             | -0.26                            | -0.48  | 1.00           | -0.25  | 1.00               | -0.37  | -0.25  | -0.37  | 1.00                             | 1.00               | 1.00               | 1.00           |
| Ion-type                | y <sup>+++6</sup> | b <sup>+++12</sup> | b <sup>+++10</sup> | y <sup>+++15</sup> |                | y <sup>+++16</sup>                                            |                                 | b <sub>e</sub> -H <sub>2</sub> O | sty                         |                    |              |             |                   |                                  |        | y <sub>6</sub> |        | y <sup>+++20</sup> |        |        |        | y <sup>+++15</sup>               | b <sup>+++16</sup> | b <sup>+++17</sup> | b <sub>9</sub> |
| Delta Da                | 0.64              | 0.03               | -0.05              | 0.30               |                | 0.05                                                          |                                 | -0.50                            | -0.03                       |                    |              |             |                   |                                  |        | 0.11           |        | 0.77               |        |        | 0.69   | 0.49                             | 0.09               | -0.02              |                |
|                         |                   | y <sup>++7</sup>   |                    |                    |                |                                                               |                                 |                                  |                             |                    |              |             |                   |                                  |        |                |        |                    |        |        |        | y <sub>7</sub> -H <sub>2</sub> O |                    |                    |                |

# Peak 379

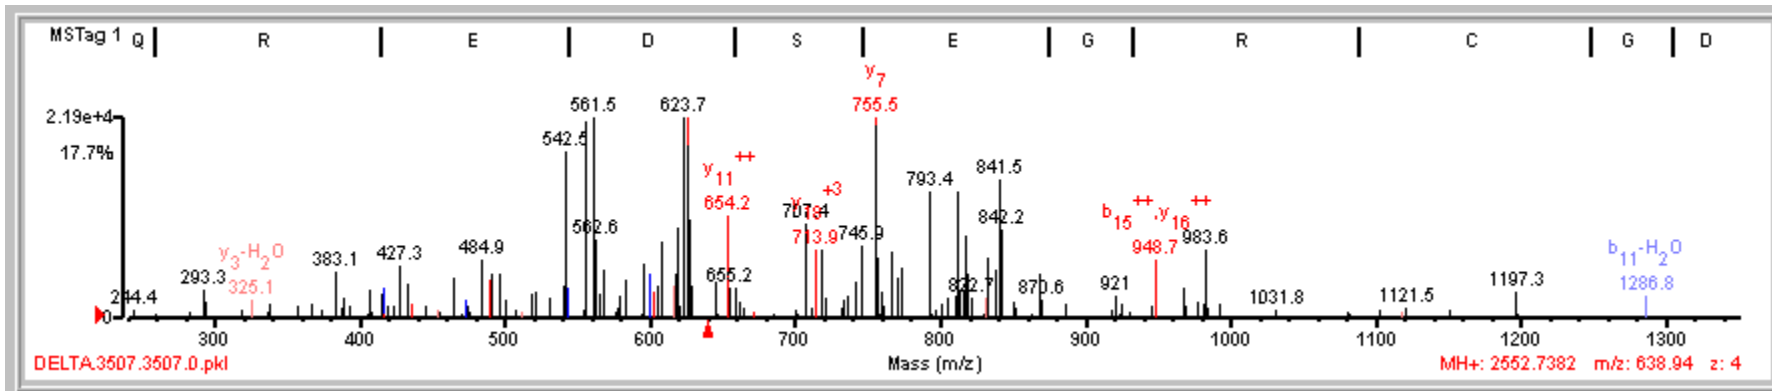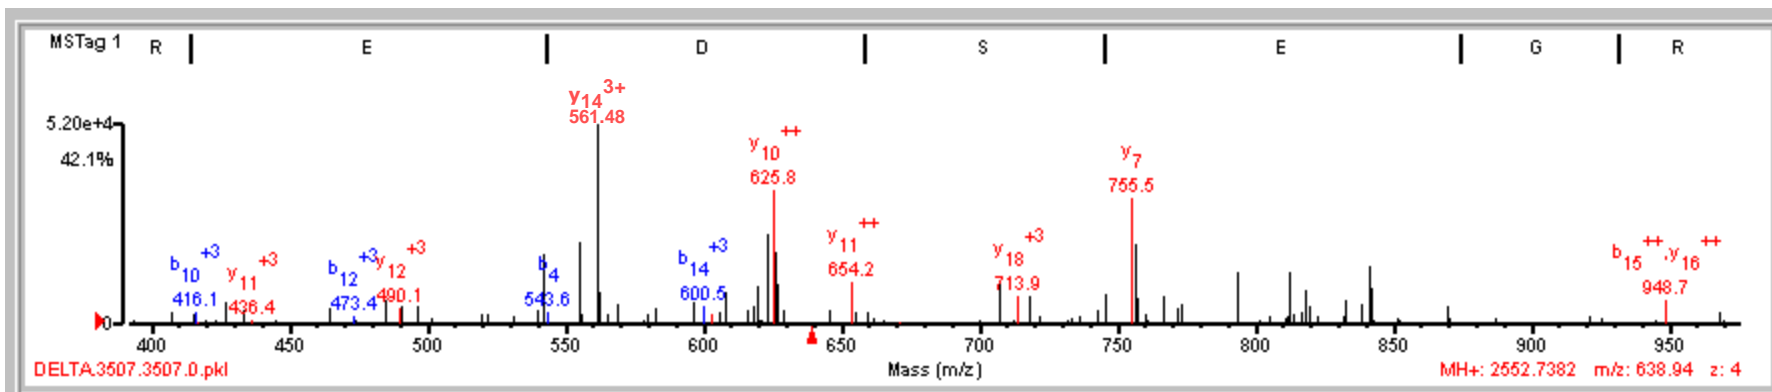

| Rank | Score | SPI (%) | BCS | # Unmatched ions | # Variable sites | Sequence                                                            | MH <sup>+</sup> Calculated (Da) | MH <sup>+</sup> Error (Da) | MH <sup>+</sup> Error (ppm) | Protein MW/pi (Da) | Species      | Accession #               | MS-Digest Index #     | Protein Name                |
|------|-------|---------|-----|------------------|------------------|---------------------------------------------------------------------|---------------------------------|----------------------------|-----------------------------|--------------------|--------------|---------------------------|-----------------------|-----------------------------|
| 1    | 9.71  | 89.9    | 7   | 4/14             | Y898y            | (R) E Q R E D S E / G / R / C / I / G / D Y \ H / P E G E A P R (L) | 2474.04                         | 78.6996                    | -496.2                      | 114874.6/4.38      | Homo sapiens | <a href="#">119220598</a> | <a href="#">36055</a> | apolipoprotein B48 receptor |

| Fragment-ion (m/z)      | 490.07             | 542.46             | 555.35             | 561.48             | 619.91 | 623.68            | 625.75            | 654.21            | 707.44 | 755.54         | 793.45 | 812.83             | 818.09 | 841.53            |
|-------------------------|--------------------|--------------------|--------------------|--------------------|--------|-------------------|-------------------|-------------------|--------|----------------|--------|--------------------|--------|-------------------|
| Frac. Inten. (% of TIC) | 1.99               | 5.04               | 5.04               | 35.22              | 2.71   | 4.84              | 13.30             | 3.00              | 2.15   | 12.64          | 2.98   | 3.44               | 2.27   | 5.36              |
| Rel. Inten. (% of BP)   | 5.66               | 14.32              | 14.30              | 100.00             | 7.70   | 13.74             | 37.75             | 8.53              | 6.09   | 35.89          | 8.47   | 9.77               | 6.45   | 15.22             |
| Score                   | 1.00               | 1.00               | 1.00               | 1.00               | -0.08  | 1.00              | 1.00              | 1.00              | -0.06  | 1.00           | -0.08  | 1.00               | -0.06  | 1.00              |
| Ion-type                | y+++ <sub>12</sub> | y+++ <sub>13</sub> | b+++ <sub>13</sub> | y+++ <sub>14</sub> |        | b++ <sub>10</sub> | y++ <sub>10</sub> | y++ <sub>11</sub> |        | y <sub>7</sub> |        | y+++ <sub>13</sub> |        | y++ <sub>14</sub> |
| Delta Da                | 0.22               | 0.58               | 0.48               | 0.59               |        | -0.58             | 0.00              | -0.05             |        | 0.17           |        | 0.51               |        | 0.70              |







# Peak 383

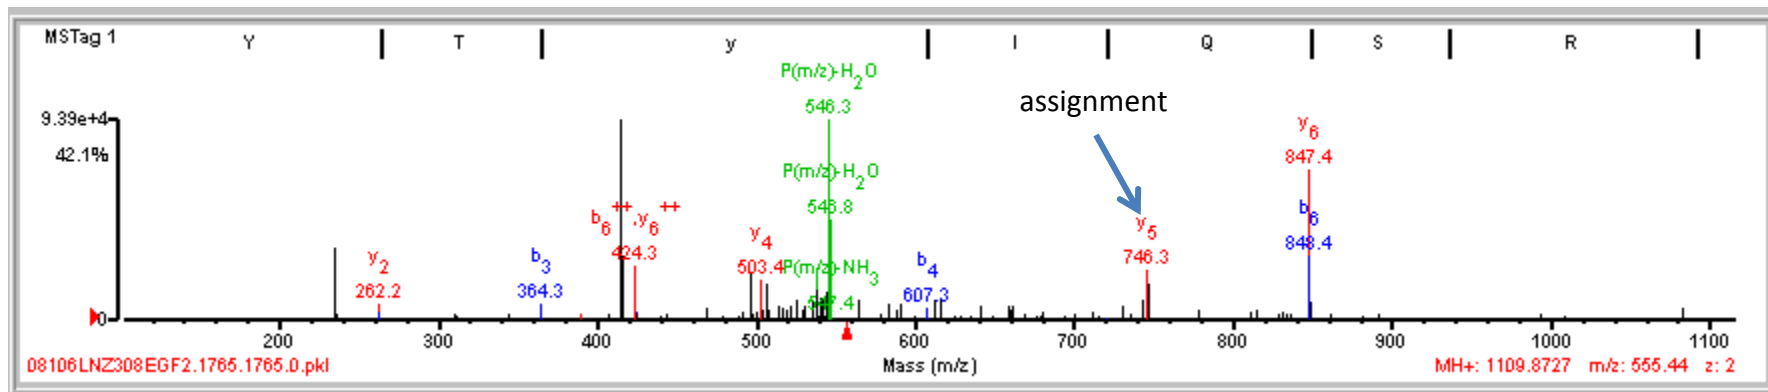

| Rank | Score | SPI (%) | BCS | # Unmatched Ions | Variable sites | Sequence                  | MH <sup>+</sup> Calculated (Da) | MH <sup>+</sup> Error (Da) | MH <sup>+</sup> Error (ppm) | Protein MW/pl (Da) | Species      | Accession #               | MS-Digest Index #     | Protein Name                                                               |
|------|-------|---------|-----|------------------|----------------|---------------------------|---------------------------------|----------------------------|-----------------------------|--------------------|--------------|---------------------------|-----------------------|----------------------------------------------------------------------------|
| 1    | 8.55  | 94.1    | 5   | 2/11             | Y382y          | (R) V/Y/T/Y/I Q I S R (F) | 1029.54                         | 80.3364                    | 333.4                       | 66652.0/9.70       | Homo sapiens | <a href="#">153281169</a> | <a href="#">7143</a>  | dual-specificity tyrosine-(Y)-phosphorylation regulated kinase 2 isoform 2 |
| 1    | 8.55  | 94.1    | 5   | 2/11             | Y264y          | (K) V/Y/T/Y/I Q I S R (F) | 1029.54                         | 80.3364                    | 333.4                       | 59608.8/9.03       | Homo sapiens | <a href="#">28827774</a>  | <a href="#">21709</a> | dual-specificity tyrosine-(Y)-phosphorylation regulated kinase 4           |
| 1    | 8.55  | 94.1    | 5   | 2/11             | Y309y          | (R) V/Y/T/Y/I Q I S R (F) | 1029.54                         | 80.3364                    | 333.4                       | 59715.1/9.53       | Homo sapiens | <a href="#">4503427</a>   | <a href="#">25148</a> | dual-specificity tyrosine-(Y)-phosphorylation regulated kinase 2 isoform 1 |

| Fragment-ion (m/z)      | 235.06         | 262.21         | 415.39                                         | 424.29                       | 496.90                                         | 503.39         | 506.41                       | 545.13 | 660.90 | 746.30         | 847.43         |
|-------------------------|----------------|----------------|------------------------------------------------|------------------------------|------------------------------------------------|----------------|------------------------------|--------|--------|----------------|----------------|
| Frac. Inten. (% of TIC) | 8.34           | 2.79           | 29.06                                          | 7.36                         | 7.27                                           | 5.47           | 0.11                         | 3.04   | 2.85   | 9.13           | 24.58          |
| Rel. Inten. (% of BP)   | 28.69          | 9.60           | 100.00                                         | 25.33                        | 25.00                                          | 18.82          | 0.39                         | 10.46  | 9.82   | 31.41          | 84.58          |
| Score                   | 0.25           | 1.00           | 0.50                                           | 1.00                         | 0.50                                           | 1.00           | 1.50                         | -0.10  | -0.10  | 1.00           | 1.00           |
| Ion-type                | a <sub>2</sub> | y <sub>2</sub> | b <sub>6</sub> <sup>++</sup> -H <sub>2</sub> O | b <sub>6</sub> <sup>++</sup> | y <sub>7</sub> <sup>++</sup> -H <sub>2</sub> O | y <sub>4</sub> | y <sub>7</sub> <sup>++</sup> |        |        | y <sub>5</sub> | y <sub>6</sub> |
| Delta Da                | -0.08          | 0.06           | -0.29                                          | -0.39                        | 0.18                                           | 0.10           | 0.69                         |        |        | -0.02          | 0.06           |
|                         |                |                | y <sub>6</sub> <sup>++</sup> -H <sub>2</sub> O | y <sub>6</sub> <sup>++</sup> |                                                |                | 1.50                         |        |        |                |                |
|                         |                |                | 0.21                                           | 0.10                         |                                                |                | sty                          |        |        |                |                |
|                         |                |                |                                                |                              |                                                |                | 0.14                         |        |        |                |                |

# Peak 384

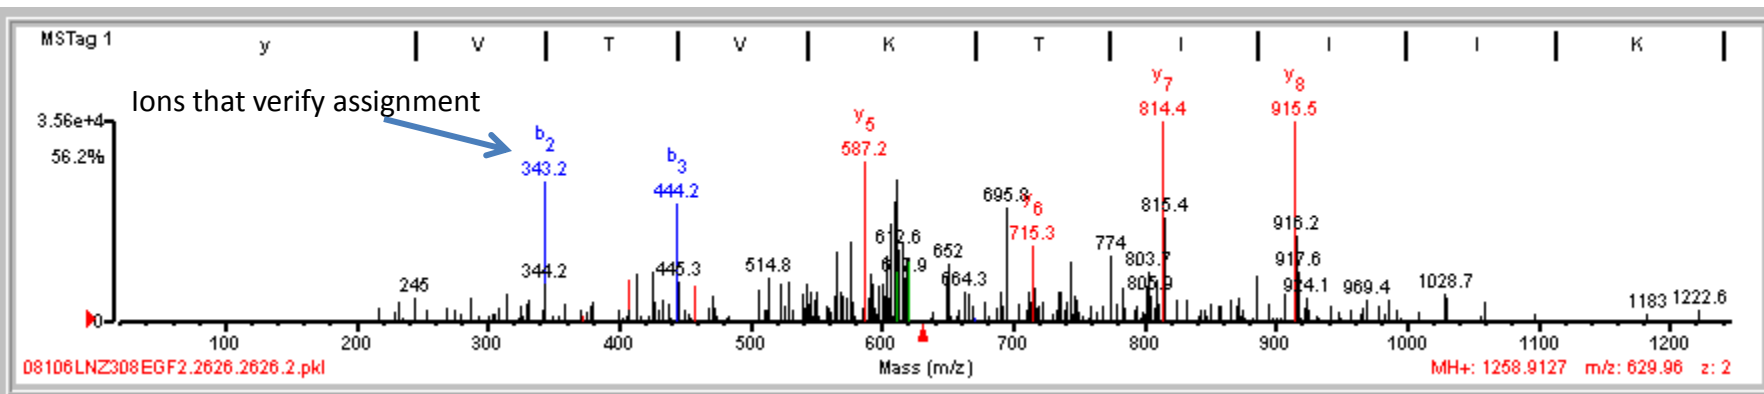

| Rank                    | Score          | SPI (%)         | BCS                              | # Unmatched Ions | Variable sites | Sequence                          | MH <sup>+</sup> Calculated (Da) | MH <sup>+</sup> Error (Da) | MH <sup>+</sup> Error (ppm) | Protein MW/pl (Da) | Species      | Accession #               | MS-Digest Index #     | Protein Name                                         |        |        |        |        |        |                |                |        |                |                |        |
|-------------------------|----------------|-----------------|----------------------------------|------------------|----------------|-----------------------------------|---------------------------------|----------------------------|-----------------------------|--------------------|--------------|---------------------------|-----------------------|------------------------------------------------------|--------|--------|--------|--------|--------|----------------|----------------|--------|----------------|----------------|--------|
| 1                       | 6.49           | 57.8            | 4                                | 14/25            | Y369y          | (R) Y V T I V I K / T I I I K (D) | 1177.76                         | 81.1573                    | 946.0                       | 48470.6/7.93       | Homo sapiens | <a href="#">156523268</a> | <a href="#">30000</a> | transcriptional adaptor 2 (ADA2 homolog, yeast)-beta |        |        |        |        |        |                |                |        |                |                |        |
| Fragment-ion (m/z)      | 343.19         | 407.80          | 426.13                           | 444.17           | 543.79         | 565.50                            | 569.89                          | 576.10                     | 587.24                      | 594.24             | 601.81       | 604.48                    | 607.62                | 609.72                                               | 616.50 | 618.55 | 652.04 | 690.76 | 695.85 | 715.33         | 743.84         | 773.96 | 803.71         | 814.45         | 915.50 |
| Frac. Inten. (% of TIC) | 5.54           | 1.80            | 1.78                             | 5.16             | 1.80           | 3.18                              | 1.80                            | 4.14                       | 5.00                        | 1.99               | 3.03         | 2.08                      | 3.27                  | 3.74                                                 | 3.92   | 2.93   | 2.03   | 1.98   | 3.94   | 3.91           | 1.88           | 2.90   | 3.04           | 15.28          | 13.90  |
| Rel. Inten. (% of BP)   | 36.24          | 11.78           | 11.62                            | 33.76            | 11.76          | 20.78                             | 11.79                           | 27.08                      | 32.71                       | 13.01              | 19.84        | 13.61                     | 21.42                 | 24.45                                                | 25.64  | 19.14  | 13.29  | 12.93  | 25.80  | 25.56          | 12.31          | 18.95  | 19.87          | 100.00         | 90.96  |
| Score                   | 1.00           | 1.00            | 0.50                             | 1.00             | 1.00           | -0.21                             | 0.50                            | -0.27                      | 1.00                        | -0.13              | -0.20        | -0.14                     | -0.21                 | -0.24                                                | -0.26  | -0.19  | -0.13  | -0.13  | -0.26  | 1.00           | 0.25           | -0.19  | -0.20          | 1.00           | 1.00   |
| Ion-type                | b <sub>2</sub> | y <sup>++</sup> | b <sub>3</sub> -H <sub>2</sub> O | b <sub>3</sub>   | b <sub>4</sub> |                                   | y <sub>5</sub> -NH <sub>3</sub> |                            | y <sub>5</sub>              |                    |              |                           |                       |                                                      |        |        |        |        |        | y <sub>6</sub> | a <sub>6</sub> |        | y <sub>7</sub> | y <sub>8</sub> |        |
| Delta Da                | 0.08           | 0.01            | -0.01                            | 0.02             | 0.57           |                                   | -0.50                           |                            | -0.17                       |                    |              |                           |                       |                                                      |        |        |        |        |        | -0.18          | -0.53          |        | -0.13          | -0.12          |        |

# Peak 385

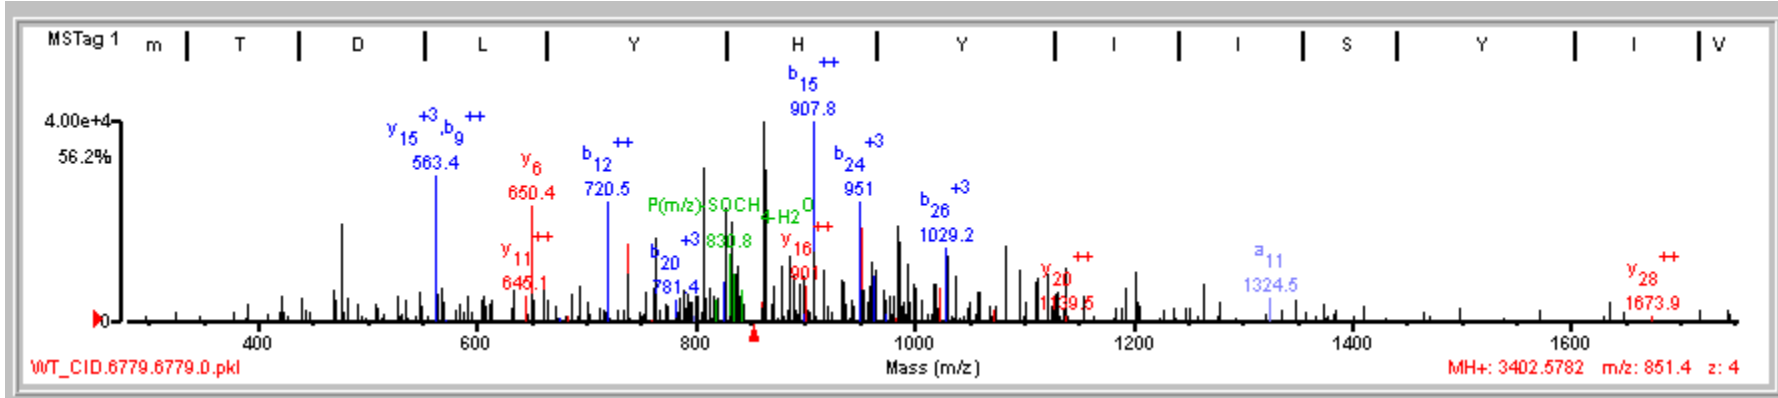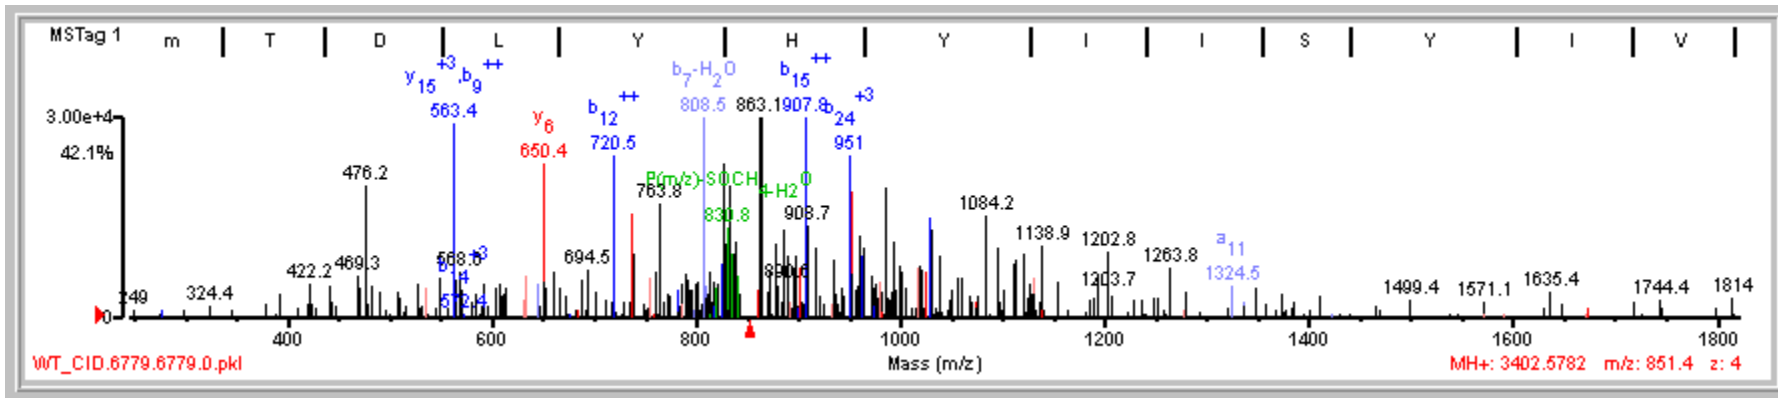

| Rank                   | Score            | SPI (%)          | BCS            | # Unmatched Ions  | Variable sites    | Sequence                                                          | MH* Calculated (Da) | MH* Error (Da) | MH* Error (ppm) | Protein MW/pl (Da) | Species           | Accession #               | MS-Digest Index #     | Protein Name                             |         |
|------------------------|------------------|------------------|----------------|-------------------|-------------------|-------------------------------------------------------------------|---------------------|----------------|-----------------|--------------------|-------------------|---------------------------|-----------------------|------------------------------------------|---------|
| 1                      | 10.09            | 61.5             | 7              | 4/15              | M72m Y91y         | (K)G E m T D L Y H Y I I S Y I V D/G K I I I /y G/P A Y S G R (E) | 3307.67             | 94.9074        | -309.7          | 48272.3/8.27       | Homo sapiens      | <a href="#">156616284</a> | <a href="#">33061</a> | pregnancy specific beta-1-glycoprotein 9 |         |
| Fragment-ion (m/z)     | 476.25           | 563.37           | 650.44         | 720.52            | 737.57            | 808.51                                                            | 827.47              | 833.89         | 835.57          | 863.07             | 907.83            | 951.02                    | 963.37                | 985.48                                   | 1029.21 |
| Frac. Inten.(% of TIC) | 5.21             | 6.44             | 6.21           | 4.69              | 4.84              | 7.20                                                              | 0.19                | 4.53           | 0.13            | 20.11              | 12.22             | 10.40                     | 3.99                  | 8.60                                     | 5.25    |
| Rel. Inten.(% of BP)   | 25.90            | 32.01            | 30.88          | 23.32             | 24.08             | 35.79                                                             | 0.94                | 22.54          | 0.65            | 100.00             | 60.77             | 51.74                     | 19.83                 | 42.78                                    | 26.10   |
| Score                  | 1.00             | 1.00             | 1.00           | 1.00              | 1.00              | 0.50                                                              | 1.50                | -0.23          | 2.00            | -1.00              | 1.00              | 1.00                      | 1.00                  | -0.43                                    | -0.26   |
| Ion-type               | y <sup>++8</sup> | b <sup>++9</sup> | y <sub>6</sub> | b <sup>++12</sup> | y <sup>++13</sup> | b <sub>7</sub> -H <sub>2</sub> O                                  | sty                 |                | m               |                    | b <sup>++15</sup> | y <sub>6</sub>            | b <sub>8</sub>        |                                          |         |
| Delta Da               | 0.56             | -0.36            | 0.11           | 0.19              | -0.31             | 0.19                                                              | 0.30                |                |                 |                    | -0.09             | -0.11                     | 0.64                  | -0.02                                    |         |



# Peak 386

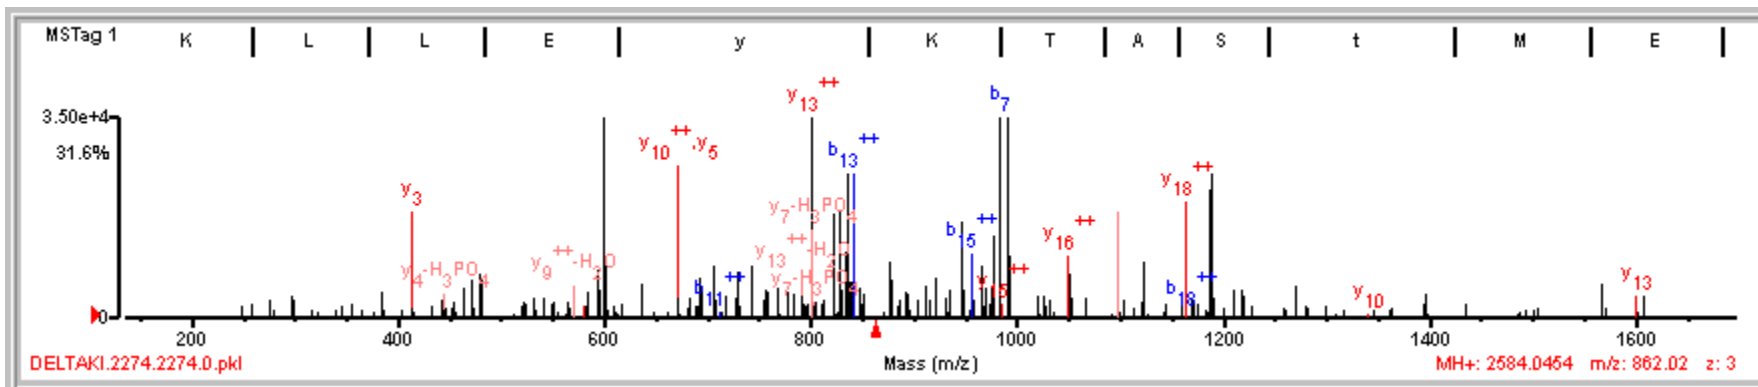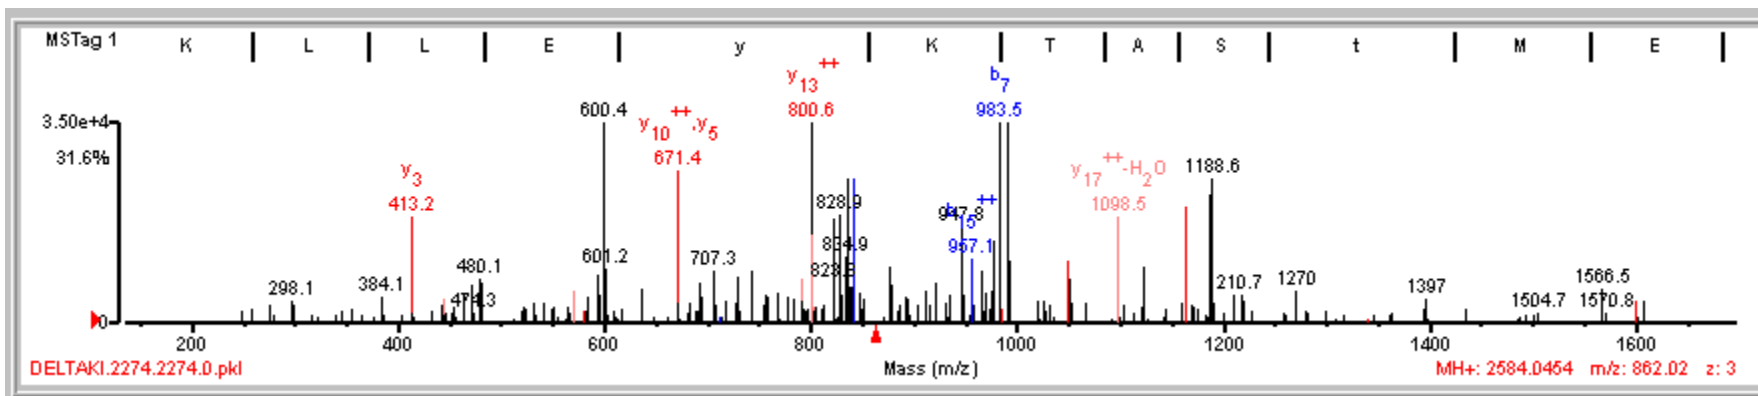

| Rank                    | Score          | SPI (%) | BCS                              | # Unmatched Ions               | Variable sites    | Sequence                                          | MH <sup>+</sup> Calculated (Da)                  | MH <sup>+</sup> Error (Da)     | MH <sup>+</sup> Error (ppm) | Protein MW/pl (Da) | Species      | Accession #                    | MS-Digest Index #     | Protein Name                                     |                                |                                  |        |                |        |                                |         |                                |         |
|-------------------------|----------------|---------|----------------------------------|--------------------------------|-------------------|---------------------------------------------------|--------------------------------------------------|--------------------------------|-----------------------------|--------------------|--------------|--------------------------------|-----------------------|--------------------------------------------------|--------------------------------|----------------------------------|--------|----------------|--------|--------------------------------|---------|--------------------------------|---------|
| 1                       | 11.64          | 71.6    | 7                                | 8/23                           | T209t Y207y S219s | (K) Q K/L L/E y K t A S T M E N\ D  E E/s v K (E) | 2343.14                                          | 240.9070                       | 390.1                       | 34153.7/8.94       | Homo sapiens | <a href="#">157388991</a>      | <a href="#">14290</a> | solute carrier family 25, member 36 isoform b    |                                |                                  |        |                |        |                                |         |                                |         |
| Fragment-ion (m/z)      | 413.23         | 480.06  | 594.25                           | 600.40                         | 671.39            | 707.31                                            | 792.12                                           | 800.62                         | 823.07                      | 828.92             | 835.64       | 842.16                         | 877.44                | 947.82                                           | 957.08                         | 965.54                           | 978.49 | 983.54         | 991.96 | 1050.55                        | 1098.51 | 1163.81                        | 1187.50 |
| Frac. Inten. (% of TIC) | 2.63           | 1.81    | 1.66                             | 7.37                           | 3.86              | 1.73                                              | 2.09                                             | 25.68                          | 0.09                        | 0.11               | 3.33         | 3.04                           | 2.03                  | 2.95                                             | 2.10                           | 2.57                             | 1.74   | 12.54          | 8.67   | 2.46                           | 2.26    | 2.47                           | 6.81    |
| Rel. Inten. (% of BP)   | 10.23          | 7.06    | 6.46                             | 28.68                          | 15.04             | 6.73                                              | 8.14                                             | 100.00                         | 0.36                        | 0.42               | 12.96        | 11.83                          | 7.90                  | 11.48                                            | 8.18                           | 9.99                             | 6.79   | 48.83          | 33.78  | 9.59                           | 8.79    | 9.62                           | 26.53   |
| Score                   | 1.00           | -0.07   | 0.50                             | 1.00                           | 1.00              | -0.07                                             | 0.50                                             | 1.00                           | 0.25                        | 1.50               | -0.13        | 1.00                           | -0.08                 | 0.50                                             | 1.00                           | 0.50                             | -0.07  | 1.00           | -0.34  | 1.00                           | -0.09   | 1.00                           | -0.27   |
| Ion-type                | y <sub>3</sub> |         | b <sub>6</sub> -H <sub>2</sub> O | b <sup>+++</sup> <sub>14</sub> | y <sub>5</sub>    |                                                   | y <sup>+++</sup> <sub>13</sub> -H <sub>2</sub> O | y <sup>+++</sup> <sub>13</sub> | st                          | sty                |              | b <sup>+++</sup> <sub>13</sub> |                       | b <sup>+++</sup> <sub>15</sub> -H <sub>2</sub> O | b <sup>+++</sup> <sub>15</sub> | b <sub>7</sub> -H <sub>2</sub> O |        | b <sub>7</sub> |        | y <sup>+++</sup> <sub>16</sub> |         | y <sup>+++</sup> <sub>18</sub> |         |
| Delta Da                | 0.05           |         | -0.11                            | 0.48                           | 0.13              |                                                   | 0.35                                             | -0.16                          | 0.05                        | -0.11              |              | -0.20                          |                       | -0.07                                            | 0.19                           | 0.05                             |        | 0.04           |        | -0.31                          |         | -0.14                          | 0.32    |



# Peak 388

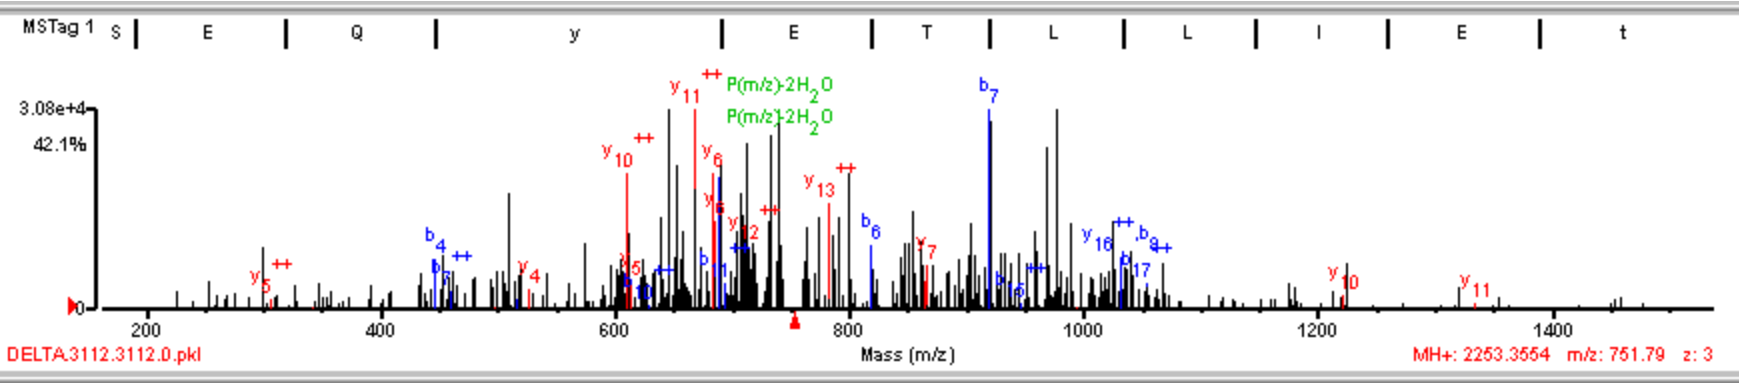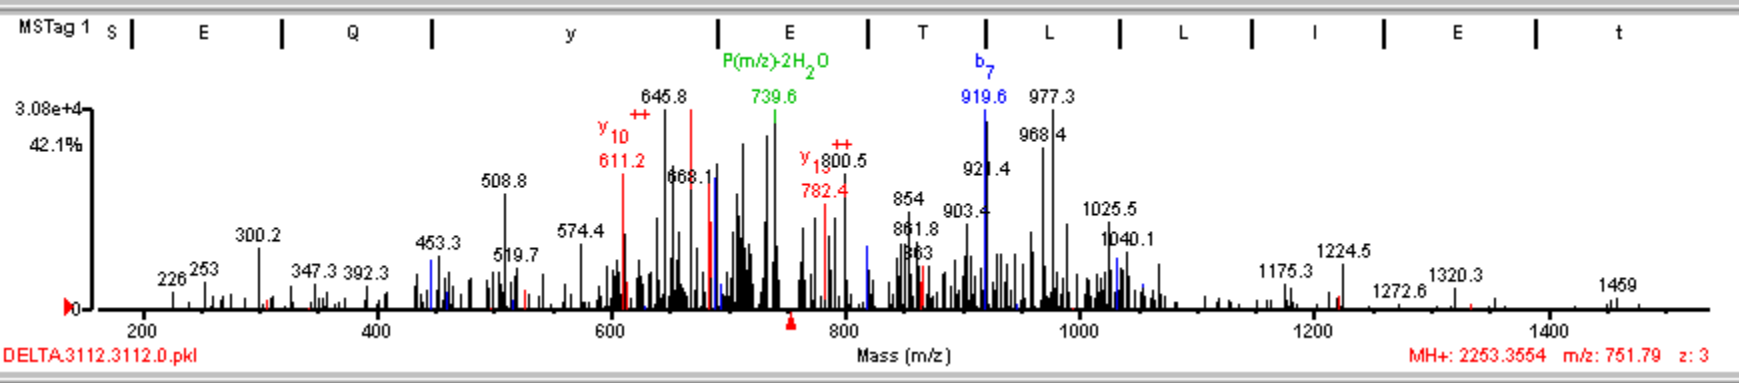

| Rank                   | Score                           | SPI (%)                        | BCS                            | # Unmatched Ions | Variable sites                  | Sequence                                    | MH <sup>+</sup> Calculated (Da) | MH <sup>+</sup> Error (Da)                       | MH <sup>+</sup> Error (ppm) | Protein MW/pI (Da)             | Species      | Accession #                      | MS-Digest Index #     | Protein Name              |                                                  |                                |                                 |
|------------------------|---------------------------------|--------------------------------|--------------------------------|------------------|---------------------------------|---------------------------------------------|---------------------------------|--------------------------------------------------|-----------------------------|--------------------------------|--------------|----------------------------------|-----------------------|---------------------------|--------------------------------------------------|--------------------------------|---------------------------------|
| 1                      | 9.90                            | 87.2                           | 6                              | 3/17             | T395t Y388y S398s               | (R) T/S/E/Q Y\E/T/L/L I E t/A S s L V K (N) | 2012.04                         | 241.3121                                         | 627.1                       | 47088.5/4.87                   | Homo sapiens | <a href="#">158187521</a>        | <a href="#">21400</a> | A-kinase anchor protein 5 |                                                  |                                |                                 |
| Fragment-ion (m/z)     | 508.85                          | 611.17                         | 645.78                         | 653.66           | 667.63                          | 684.08                                      | 689.36                          | 708.15                                           | 713.13                      | 717.95                         | 733.64       | 800.48                           | 854.05                | 919.55                    | 959.13                                           | 968.41                         | 977.34                          |
| Frac. Inten.(% of TIC) | 3.49                            | 6.51                           | 8.35                           | 4.01             | 9.29                            | 5.69                                        | 6.75                            | 5.79                                             | 0.13                        | 4.11                           | 4.57         | 3.79                             | 4.24                  | 15.14                     | 4.18                                             | 6.72                           | 7.25                            |
| Rel. Inten.(% of BP)   | 23.03                           | 42.99                          | 55.12                          | 26.48            | 61.34                           | 37.55                                       | 44.55                           | 38.27                                            | 0.85                        | 27.16                          | 30.20        | 25.03                            | 28.02                 | 100.00                    | 27.63                                            | 44.38                          | 47.89                           |
| Score                  | 0.50                            | 1.00                           | 1.00                           | -0.26            | 1.00                            | 1.00                                        | 1.00                            | 0.50                                             | 0.25                        | 1.00                           | -0.30        | 0.50                             | -0.28                 | 1.00                      | 0.50                                             | 1.00                           | 0.50                            |
| Ion-type               | y <sub>4</sub> -NH <sub>3</sub> | y <sup>+++</sup> <sub>10</sub> | y <sup>+++</sup> <sub>15</sub> |                  | y <sup>+++</sup> <sub>11</sub>  | y <sub>6</sub>                              | b <sub>5</sub>                  | y <sup>+++</sup> <sub>12</sub> -H <sub>2</sub> O | st                          | y <sup>+++</sup> <sub>12</sub> |              | b <sub>6</sub> -H <sub>2</sub> O |                       | b <sub>7</sub>            | y <sup>+++</sup> <sub>15</sub> -H <sub>2</sub> O | y <sup>+++</sup> <sub>15</sub> | y <sub>8</sub> -NH <sub>3</sub> |
| Delta Da               | -0.39                           | 0.39                           | 0.17                           |                  | 0.31                            | -0.25                                       | 0.14                            | -0.69                                            | 0.47                        | 0.10                           |              | 0.23                             |                       | 0.24                      | 0.22                                             | 0.50                           | -0.02                           |
|                        |                                 |                                |                                |                  | y <sub>6</sub> -NH <sub>3</sub> |                                             | y <sup>+++</sup> <sub>16</sub>  |                                                  |                             | y <sup>+++</sup> <sub>17</sub> |              |                                  |                       |                           |                                                  |                                |                                 |
|                        |                                 |                                |                                |                  | 0.32                            |                                             | 0.73                            |                                                  |                             | 0.31                           |              |                                  |                       |                           |                                                  |                                |                                 |

# Peak 389

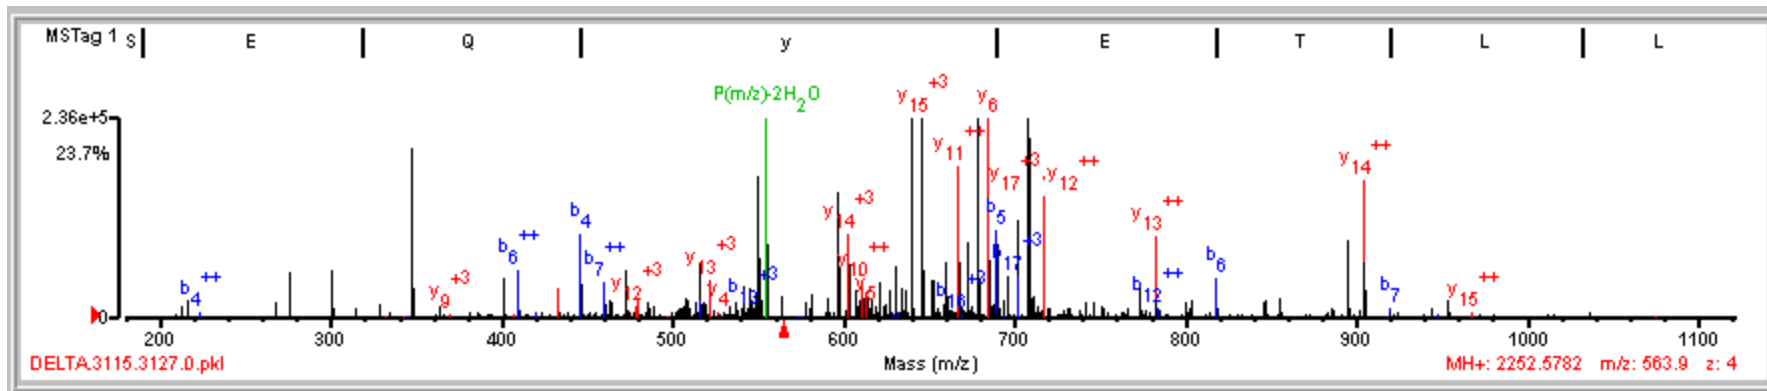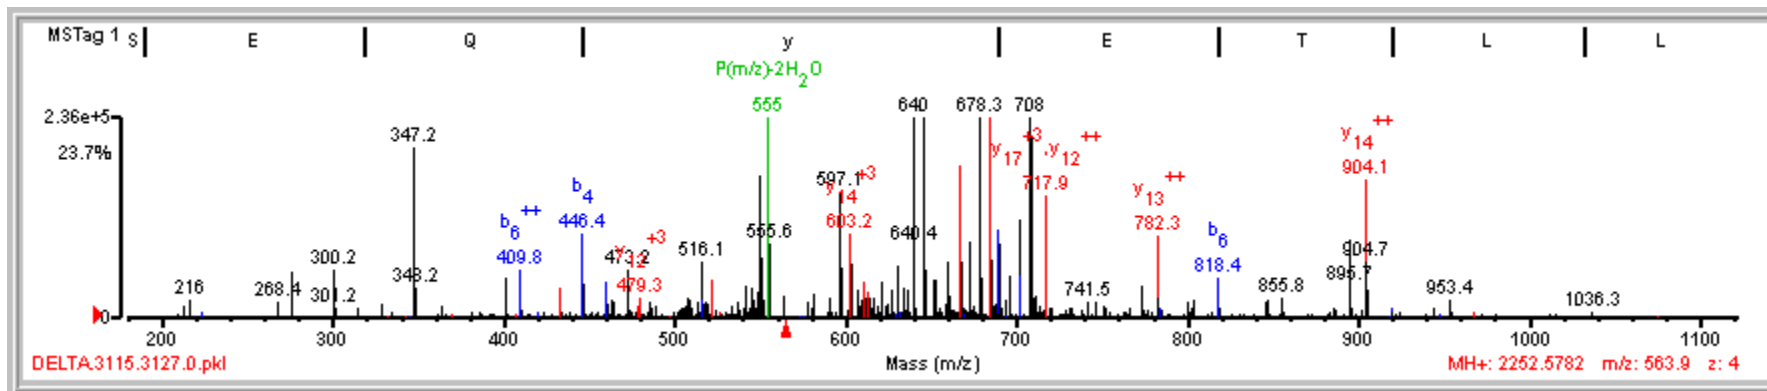

| Rank | Score | SPI (%) | BCS | # Unmatched Ions | Variable sites    | Sequence                                    | MH <sup>+</sup> Calculated (Da) | MH <sup>+</sup> Error (Da) | MH <sup>+</sup> Error (ppm) | Protein MW/pI (Da) | Species      | Accession #               | MS-Digest Index #     | Protein Name              |
|------|-------|---------|-----|------------------|-------------------|---------------------------------------------|---------------------------------|----------------------------|-----------------------------|--------------------|--------------|---------------------------|-----------------------|---------------------------|
| 1    | 10.06 | 60.3    | 9   | 9/22             | T395t Y388y S397s | (R) T/S E/Q Y/E/T/L I E t/A/s I S L V K (N) | 2012.04                         | 240.5348                   | 282.2                       | 47088.5/4.87       | Homo sapiens | <a href="#">158187521</a> | <a href="#">21400</a> | A-kinase anchor protein 5 |

| Fragment-ion (m/z)      | 347.21 | 446.39         | 516.09                       | 550.52 | 597.09 | 603.17 | 610.76                        | 613.31         | 640.02 | 646.00                         | 659.82 | 667.57                        | 672.71                          | 678.34 | 684.33         | 689.41         | 701.95 | 707.98 | 717.90                         | 782.34                                          | 895.16                                          | 904.12                        |
|-------------------------|--------|----------------|------------------------------|--------|--------|--------|-------------------------------|----------------|--------|--------------------------------|--------|-------------------------------|---------------------------------|--------|----------------|----------------|--------|--------|--------------------------------|-------------------------------------------------|-------------------------------------------------|-------------------------------|
| Frac. Inten. (% of TIC) | 3.38   | 2.07           | 1.60                         | 3.95   | 3.06   | 2.67   | 1.47                          | 1.23           | 5.24   | 13.68                          | 2.38   | 4.26                          | 1.55                            | 6.88   | 20.48          | 3.00           | 2.36   | 9.84   | 2.16                           | 2.60                                            | 2.38                                            | 3.74                          |
| Rel. Inten. (% of BP)   | 16.51  | 10.12          | 7.82                         | 19.27  | 14.93  | 13.01  | 7.20                          | 6.00           | 25.56  | 66.80                          | 11.62  | 20.81                         | 7.58                            | 33.57  | 100.00         | 14.67          | 11.51  | 48.04  | 10.54                          | 12.71                                           | 11.64                                           | 18.28                         |
| Score                   | -0.17  | 1.00           | 1.00                         | -0.19  | -0.15  | -0.13  | 1.00                          | 1.00           | -0.26  | 1.00                           | -0.12  | 1.00                          | 0.50                            | -0.34  | 1.00           | 1.00           | -0.12  | -0.48  | 1.00                           | 1.00                                            | 0.50                                            | 1.00                          |
| Ion-type                |        | b <sub>4</sub> | b <sup>++</sup> <sub>8</sub> |        |        |        | y <sup>++</sup> <sub>10</sub> | y <sub>5</sub> |        | y <sup>+++</sup> <sub>15</sub> |        | y <sup>++</sup> <sub>11</sub> | b <sub>5</sub> -NH <sub>3</sub> |        | y <sub>6</sub> | b <sub>5</sub> |        |        | y <sup>++</sup> <sub>12</sub>  | y <sup>++</sup> <sub>13</sub>                   | b <sup>++</sup> <sub>14</sub> -H <sub>2</sub> O | b <sup>++</sup> <sub>14</sub> |
| Delta Da                |        | 0.20           | -0.61                        |        |        |        | -0.02                         | 0.01           |        | 0.39                           |        | 0.25                          | 0.52                            | -0.00  | 0.19           |                |        |        | 0.05                           | -0.03                                           | 0.34                                            | 0.29                          |
|                         |        | 0.09           |                              |        |        |        |                               |                |        |                                |        | 0.26                          |                                 |        |                |                |        |        | y <sup>+++</sup> <sub>17</sub> | y <sup>++</sup> <sub>14</sub> -H <sub>2</sub> O |                                                 | y <sup>++</sup> <sub>14</sub> |





# Peak 392

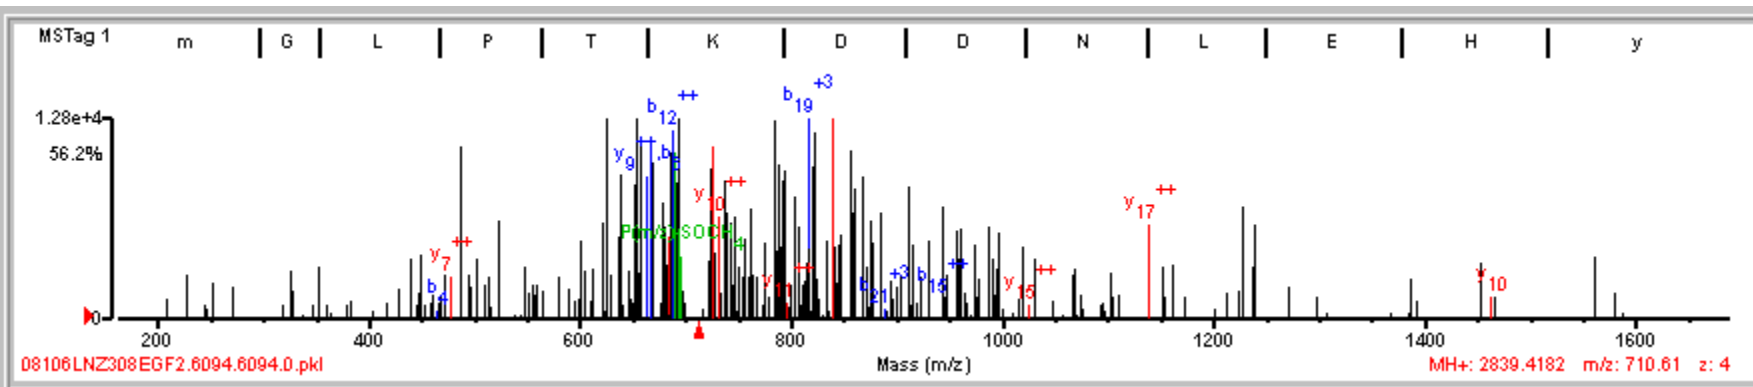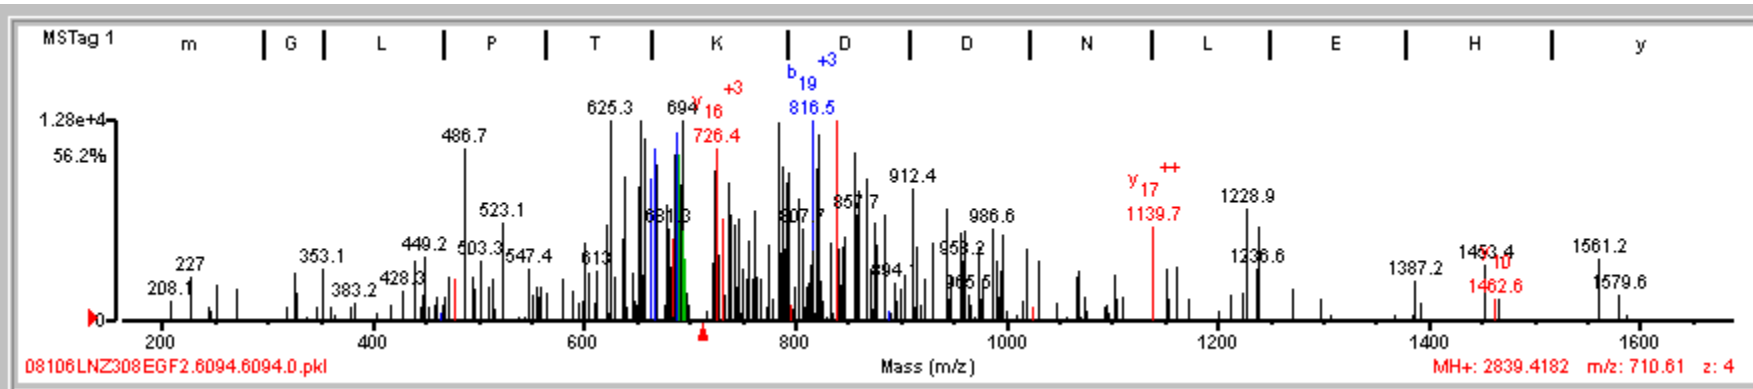

| Rank                    | Score                         | SPI (%)                         | BCS                            | # Unmatched Ions               | Variable sites                | Sequence                                                      | MH <sup>+</sup> Calculated (Da) | MH <sup>+</sup> Error (Da)     | MH <sup>+</sup> Error (ppm)    | Protein MW/pI (Da)              | Species        | Accession #                                    | MS-Digest Index # | Protein Name                                 |
|-------------------------|-------------------------------|---------------------------------|--------------------------------|--------------------------------|-------------------------------|---------------------------------------------------------------|---------------------------------|--------------------------------|--------------------------------|---------------------------------|----------------|------------------------------------------------|-------------------|----------------------------------------------|
| 1                       | 10.25                         | 87.4                            | 7                              | 2/14                           | M665m M683m T681t Y677y S680s | (R) F m G L / P T / K D D N L E \ H y K N i s t \ V m A R (A) | 2567.24                         | 272.1801                       | 102.6                          | 87713.0/6.21                    | Homo sapiens   | 16933540                                       | 842               | fibroblast activation protein, alpha subunit |
| Fragment-ion (m/z)      | 625.31                        | 654.42                          | 656.91                         | 667.50                         | 688.98                        | 694.04                                                        | 726.44                          | 783.91                         | 789.37                         | 792.84                          | 816.46         | 822.97                                         | 840.24            | 856.70                                       |
| Frac. Inten. (% of TIC) | 5.05                          | 6.64                            | 7.23                           | 7.40                           | 12.56                         | 0.27                                                          | 5.42                            | 7.88                           | 5.97                           | 6.45                            | 10.65          | 7.10                                           | 6.43              | 10.96                                        |
| Rel. Inten. (% of BP)   | 40.25                         | 52.86                           | 57.60                          | 58.90                          | 100.00                        | 2.15                                                          | 43.14                           | 62.77                          | 47.52                          | 51.39                           | 84.81          | 56.52                                          | 51.21             | 87.26                                        |
| Score                   | 1.00                          | -0.53                           | 0.50                           | 1.00                           | 1.00                          | 2.00                                                          | 1.00                            | 1.00                           | -0.48                          | 1.00                            | 1.00           | 0.50                                           | 1.00              | 0.25                                         |
| Ion-type                | b <sup>++</sup> <sub>11</sub> | y <sub>5</sub> -NH <sub>3</sub> | b <sup>+++</sup> <sub>16</sub> | b <sup>+++</sup> <sub>12</sub> | m                             | y <sup>+++</sup> <sub>16</sub>                                | b <sup>+++</sup> <sub>18</sub>  | y <sup>+++</sup> <sub>18</sub> | b <sup>+++</sup> <sub>19</sub> | y <sub>6</sub> -NH <sub>3</sub> | y <sub>6</sub> | y <sub>7</sub> -H <sub>3</sub> PO <sub>4</sub> |                   |                                              |
| Delta Da                | 0.51                          |                                 | 0.66                           | 0.21                           | -0.34                         | -0.50                                                         | 0.16                            | 0.61                           |                                | 0.53                            | 0.14           | -0.28                                          | -0.03             | 0.36                                         |





# Peak 394

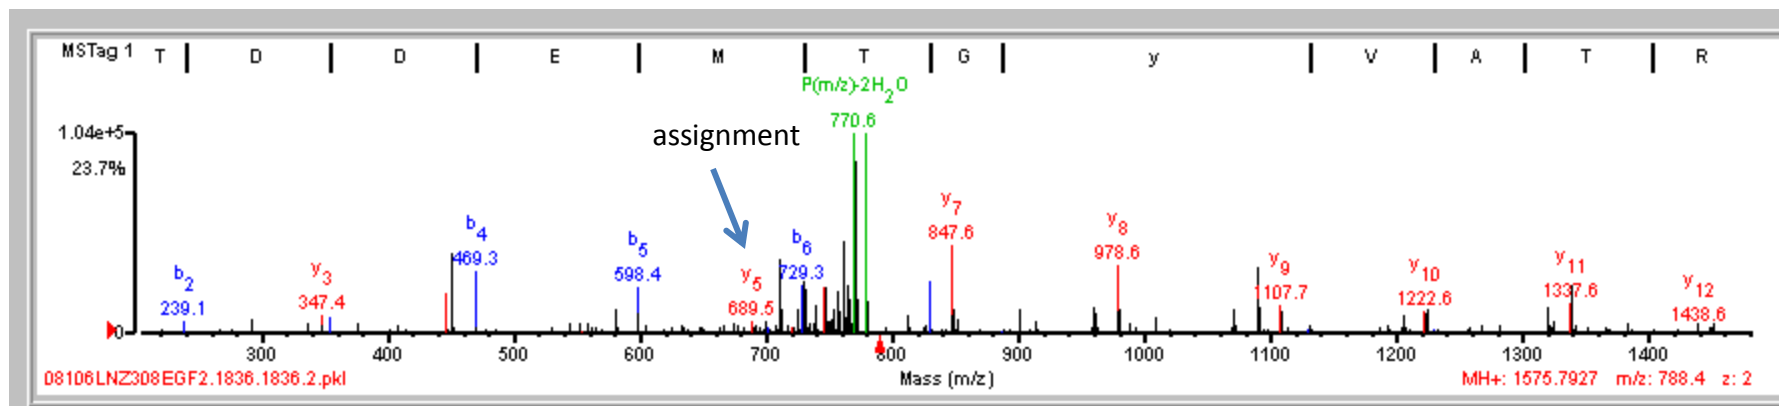

| Rank | Score | SPI (%) | BCS | # Unmatched Ions | Variable sites | Sequence                                    | MH <sup>+</sup> Calculated (Da) | MH <sup>+</sup> Error (Da) | MH <sup>+</sup> Error (ppm) | Protein MW/pI (Da) | Species      | Accession #              | MS-Digest Index #     | Protein Name                                  |
|------|-------|---------|-----|------------------|----------------|---------------------------------------------|---------------------------------|----------------------------|-----------------------------|--------------------|--------------|--------------------------|-----------------------|-----------------------------------------------|
| 1    | 8.55  | 61.7    | 5   | 8/23             | Y182y          | (R) H T D D   E   M   T   G Y / V A T R (W) | 1495.65                         | 80.1445                    | 113.1                       | 41293.5/5.48       | Homo sapiens | <a href="#">20986512</a> | <a href="#">22099</a> | mitogen-activated protein kinase 14 isoform 2 |
| 1    | 8.55  | 61.7    | 5   | 8/23             | Y182y          | (R) H T D D   E   M   T   G Y / V A T R (W) | 1495.65                         | 80.1445                    | 113.1                       | 34091.8/8.25       | Homo sapiens | <a href="#">20986514</a> | <a href="#">23816</a> | mitogen-activated protein kinase 14 isoform 3 |
| 1    | 8.55  | 61.7    | 5   | 8/23             | Y182y          | (R) H T D D   E   M   T   G Y / V A T R (W) | 1495.65                         | 80.1445                    | 113.1                       | 35453.6/8.94       | Homo sapiens | <a href="#">20986516</a> | <a href="#">25290</a> | mitogen-activated protein kinase 14 isoform 4 |
| 1    | 8.55  | 61.7    | 5   | 8/23             | Y182y          | (R) H T D D   E   M   T   G Y / V A T R (W) | 1495.65                         | 80.1445                    | 113.1                       | 41493.7/5.54       | Homo sapiens | <a href="#">4503069</a>  | <a href="#">36149</a> | mitogen-activated protein kinase 14 isoform 1 |

| Fragment-ion (m/z)      | 446.39         | 451.24                           | 469.31         | 580.30                           | 598.36         | 711.41                           | 729.31                          | 730.51 | 739.57 | 746.50         | 747.44 | 757.37 | 761.81 | 765.38 | 772.24 | 830.49                          | 847.55         | 978.55         | 1089.57                          | 1107.66        | 1223.59 | 1319.55                           | 1338.62 |
|-------------------------|----------------|----------------------------------|----------------|----------------------------------|----------------|----------------------------------|---------------------------------|--------|--------|----------------|--------|--------|--------|--------|--------|---------------------------------|----------------|----------------|----------------------------------|----------------|---------|-----------------------------------|---------|
| Frac. Inten. (% of TIC) | 2.64           | 4.99                             | 3.95           | 2.83                             | 3.83           | 5.69                             | 2.73                            | 6.03   | 0.08   | 2.64           | 6.38   | 3.59   | 8.60   | 2.68   | 3.35   | 3.32                            | 7.96           | 6.81           | 7.49                             | 3.66           | 3.06    | 3.10                              | 4.59    |
| Rel. Inten. (% of BP)   | 30.71          | 57.98                            | 45.90          | 32.88                            | 44.54          | 66.15                            | 31.78                           | 70.04  | 0.91   | 30.64          | 74.11  | 41.78  | 100.00 | 31.15  | 38.96  | 38.54                           | 92.58          | 79.16          | 87.04                            | 42.55          | 35.62   | 35.99                             | 53.38   |
| Score                   | 1.00           | 0.50                             | 1.00           | 0.50                             | 1.00           | 0.50                             | 1.00                            | -0.70  | 1.50   | 1.00           | -0.74  | -0.42  | -1.00  | -0.31  | -0.39  | 1.00                            | 1.00           | 1.00           | 0.50                             | 1.00           | -0.36   | 0.50                              | -0.53   |
| Ion-type                | y <sub>4</sub> | b <sub>4</sub> -H <sub>2</sub> O | b <sub>4</sub> | b <sub>5</sub> -H <sub>2</sub> O | b <sub>5</sub> | b <sub>6</sub> -H <sub>2</sub> O | b <sub>6</sub>                  |        | sty    | y <sub>6</sub> |        |        |        |        |        | b <sub>7</sub>                  | y <sub>7</sub> | y <sub>8</sub> | y <sub>9</sub> -H <sub>2</sub> O | y <sub>9</sub> |         | y <sub>11</sub> -H <sub>2</sub> O |         |
| Delta Da                | 0.12           | 0.08                             | 0.14           | 0.10                             | 0.15           | 0.17                             |                                 |        | 0.06   | 0.18           |        |        |        |        |        | 0.19                            | 0.18           | 0.14           | 0.13                             | 0.21           |         | 0.05                              |         |
|                         |                |                                  |                |                                  |                |                                  | y <sub>6</sub> -NH <sub>3</sub> |        | 0.01   |                |        |        |        |        |        | y <sub>7</sub> -NH <sub>3</sub> |                |                |                                  |                |         |                                   |         |

# Peak 395

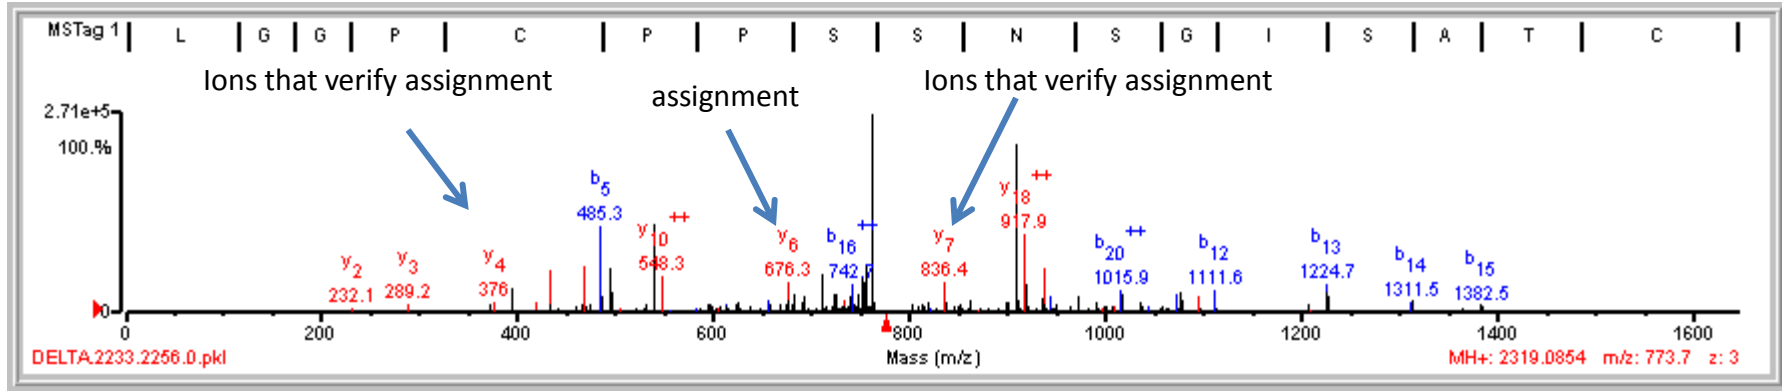

| Rank | Score | SPI (%) | BCS | # Unmatched Ions | Variable sites | Sequence                                                                        | MH <sup>+</sup> Calculated (Da) | MH <sup>+</sup> Error (Da) | MH <sup>+</sup> Error (ppm) | Protein MW/pI (Da) | Species      | Accession #              | MS-Digest Index #     | Protein Name                                              |
|------|-------|---------|-----|------------------|----------------|---------------------------------------------------------------------------------|---------------------------------|----------------------------|-----------------------------|--------------------|--------------|--------------------------|-----------------------|-----------------------------------------------------------|
| 1    | 16.50 | 82.0    | 10  | 4/24             | Y219y          | (R) L G G P C I P P S S N / S G \ I \ S \ A / T \ I C / y \ I G \ S \ G G R (M) | 2238.99                         | 80.0988                    | 57.1                        | 31609.0/6.41       | Homo sapiens | <a href="#">21361841</a> | <a href="#">26290</a> | transmembrane prostate androgen-induced protein isoform a |
| 1    | 16.50 | 82.0    | 10  | 4/24             | Y184y          | (R) L G G P C I P P S S N / S G \ I \ S \ A / T \ I C / y \ I G \ S \ G G R (M) | 2238.99                         | 80.0988                    | 57.1                        | 27899.7/6.05       | Homo sapiens | <a href="#">40317616</a> | <a href="#">27151</a> | transmembrane prostate androgen-induced protein isoform b |
| 1    | 16.50 | 82.0    | 10  | 4/24             | Y169y          | (R) L G G P C I P P S S N / S G \ I \ S \ A / T \ I C / y \ I G \ S \ G G R (M) | 2238.99                         | 80.0988                    | 57.1                        | 26201.6/6.36       | Homo sapiens | <a href="#">40317618</a> | <a href="#">28350</a> | transmembrane prostate androgen-induced protein isoform c |
| 1    | 16.50 | 82.0    | 10  | 4/24             | Y169y          | (R) L G G P C I P P S S N / S G \ I \ S \ A / T \ I C / y \ I G \ S \ G G R (M) | 2238.99                         | 80.0988                    | 57.1                        | 26201.6/6.36       | Homo sapiens | <a href="#">40317620</a> | <a href="#">29356</a> | transmembrane prostate androgen-induced protein isoform c |

| Fragment-ion (m/z)     | 433.33         | 469.23                       | 485.28         | 495.97 | 539.40                                          | 548.33                        | 676.28         | 711.32 | 742.68                        | 748.06                           | 751.92 | 756.03 | 836.38         | 909.07                                          | 917.92                        | 937.36         | 943.87                        | 972.63                        | 990.52                           | 1015.94                       | 1077.48                           | 1111.56         | 1224.74         | 1311.52         |
|------------------------|----------------|------------------------------|----------------|--------|-------------------------------------------------|-------------------------------|----------------|--------|-------------------------------|----------------------------------|--------|--------|----------------|-------------------------------------------------|-------------------------------|----------------|-------------------------------|-------------------------------|----------------------------------|-------------------------------|-----------------------------------|-----------------|-----------------|-----------------|
| Frac. Inten.(% of TIC) | 2.98           | 3.10                         | 6.38           | 3.83   | 7.70                                            | 2.14                          | 2.73           | 4.05   | 2.15                          | 2.66                             | 5.78   | 4.37   | 2.64           | 18.03                                           | 8.20                          | 3.35           | 2.22                          | 1.92                          | 1.87                             | 3.23                          | 2.84                              | 2.17            | 3.86            | 1.80            |
| Rel. Inten.(% of BP)   | 16.52          | 17.19                        | 35.37          | 21.23  | 42.68                                           | 11.84                         | 15.14          | 22.46  | 11.90                         | 14.74                            | 32.07  | 24.24  | 14.61          | 100.00                                          | 45.44                         | 18.57          | 12.31                         | 10.65                         | 10.36                            | 17.93                         | 15.77                             | 12.05           | 21.42           | 9.99            |
| Score                  | 1.00           | 1.00                         | 1.00           | -0.21  | 0.50                                            | 1.00                          | 1.00           | -0.22  | 1.00                          | 0.50                             | -0.32  | -0.24  | 1.00           | 0.50                                            | 1.00                          | 1.00           | 1.00                          | 1.00                          | 0.50                             | 1.00                          | 0.50                              | 1.00            | 1.00            | 1.00            |
| Ion-type               | y <sub>5</sub> | y <sup>++</sup> <sub>8</sub> | b <sub>5</sub> |        | y <sup>++</sup> <sub>10</sub> -H <sub>2</sub> O | y <sup>++</sup> <sub>10</sub> | y <sub>6</sub> |        | b <sup>++</sup> <sub>16</sub> | b <sub>8</sub> -H <sub>2</sub> O |        |        | y <sub>7</sub> | y <sup>++</sup> <sub>18</sub> -H <sub>2</sub> O | y <sup>++</sup> <sub>18</sub> | y <sub>8</sub> | b <sup>++</sup> <sub>18</sub> | b <sup>++</sup> <sub>19</sub> | y <sub>9</sub> -H <sub>2</sub> O | b <sup>++</sup> <sub>20</sub> | y <sub>10</sub> -H <sub>2</sub> O | b <sub>12</sub> | b <sub>13</sub> | b <sub>14</sub> |
| Delta Da               | 0.11           | 0.06                         | 0.06           |        | 0.21                                            | 0.13                          | 0.03           |        | 0.33                          | -0.28                            |        |        | 0.10           | 0.20                                            | 0.05                          | 0.04           | -0.01                         | 0.24                          | 0.17                             | 0.04                          | 0.10                              | 0.08            | 0.17            | -0.08           |

# Peak 396

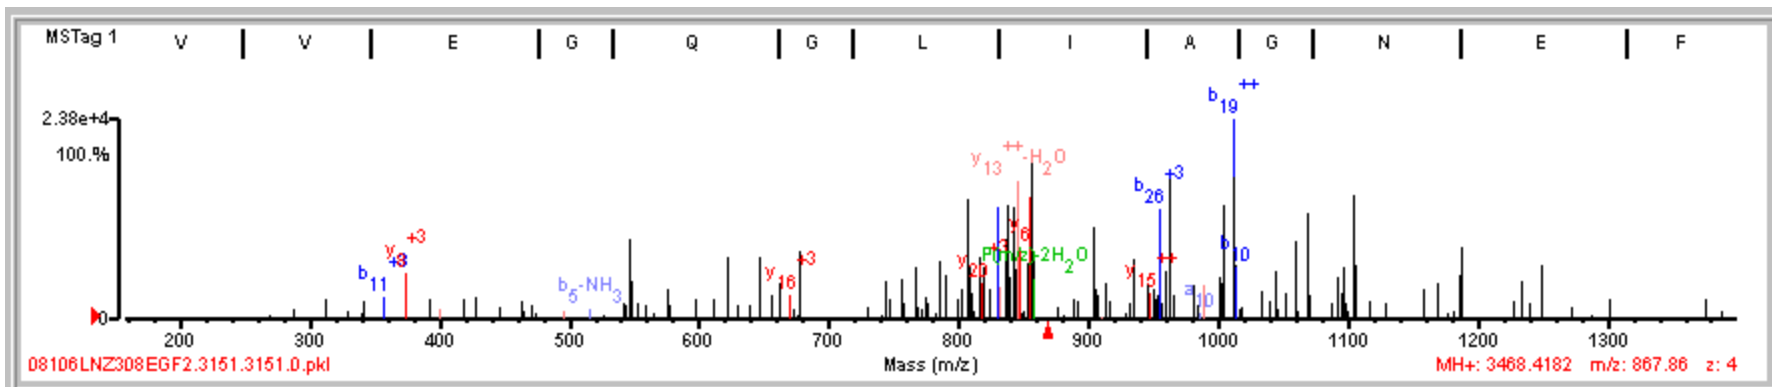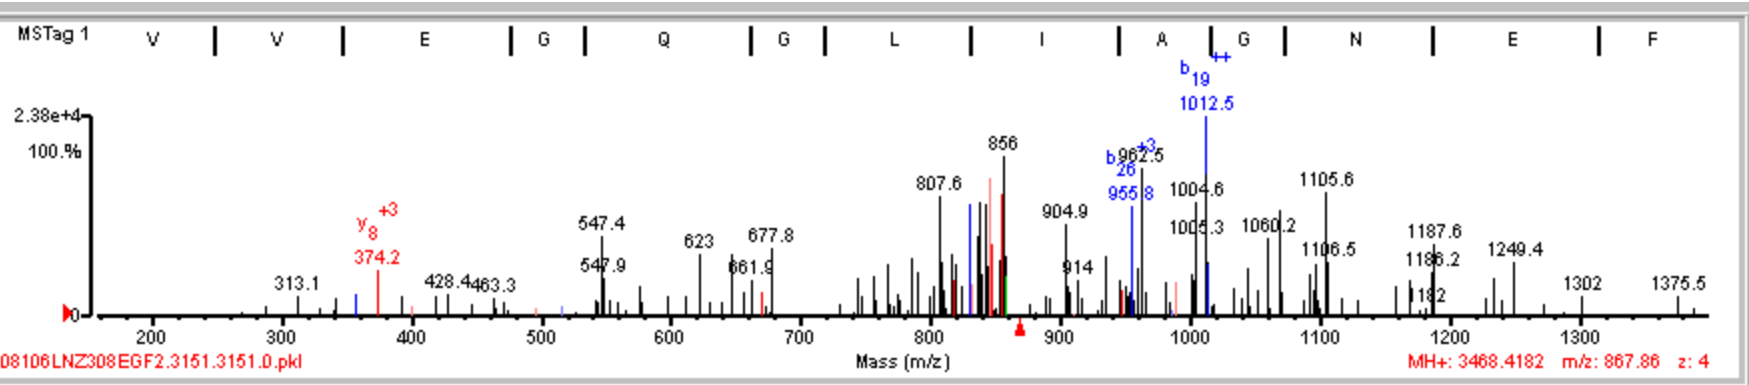

### Detailed Results

| Rank                    | Score  | SPI (%)                                         | BCS                           | # Unmatched Ions               | Variable sites | Sequence                                                                      | MH <sup>+</sup> Calculated (Da) | MH <sup>+</sup> Error (Da) | MH <sup>+</sup> Error (ppm)                     | Protein MW/pi (Da) | Species      | Accession #                   | MS-Digest Index #     | Protein Name            |                               |                               |                                |                                                 |                               |         |                                 |                 |
|-------------------------|--------|-------------------------------------------------|-------------------------------|--------------------------------|----------------|-------------------------------------------------------------------------------|---------------------------------|----------------------------|-------------------------------------------------|--------------------|--------------|-------------------------------|-----------------------|-------------------------|-------------------------------|-------------------------------|--------------------------------|-------------------------------------------------|-------------------------------|---------|---------------------------------|-----------------|
| 1                       | 11.34  | 72.2                                            | 10                            | 7/22                           | Y582y          | (R) F V V E G Q G L I A / G N E F / L G Q / Y T \ L P L L C / M N K G Y R (R) | 3387.72                         | 80.6954                    | 210.2                                           | 70411.7/9.14       | Homo sapiens | <a href="#">25188201</a>      | <a href="#">11586</a> | phospholipase C, zeta 1 |                               |                               |                                |                                                 |                               |         |                                 |                 |
| Fragment-ion (m/z)      | 547.37 | 807.65                                          | 817.12                        | 818.93                         | 830.60         | 836.07                                                                        | 838.25                          | 843.26                     | 846.04                                          | 848.22             | 853.09       | 855.16                        | 904.94                | 955.76                  | 962.54                        | 1004.56                       | 1012.49                        | 1060.23                                         | 1069.62                       | 1096.65 | 1104.90                         | 1186.25         |
| Frac. Inten. (% of TIC) | 3.41   | 5.05                                            | 2.53                          | 2.55                           | 4.23           | 3.06                                                                          | 6.59                            | 0.18                       | 5.04                                            | 2.82               | 2.74         | 8.87                          | 5.37                  | 3.50                    | 4.45                          | 5.44                          | 12.87                          | 2.90                                            | 3.78                          | 3.10    | 8.21                            | 3.32            |
| Rel. Inten. (% of BP)   | 26.48  | 39.22                                           | 19.67                         | 19.82                          | 32.87          | 23.74                                                                         | 51.18                           | 1.39                       | 39.19                                           | 21.88              | 21.32        | 68.87                         | 41.69                 | 27.17                   | 34.55                         | 42.28                         | 100.00                         | 22.51                                           | 29.38                         | 24.05   | 63.75                           | 25.80           |
| Score                   | -0.26  | 0.50                                            | 1.00                          | 1.00                           | 1.00           | -0.24                                                                         | -0.51                           | 1.50                       | 0.50                                            | 1.00               | -0.21        | 1.00                          | -0.42                 | -0.27                   | 1.00                          | 1.00                          | 1.00                           | 0.50                                            | 1.00                          | -0.24   | 0.50                            | 1.00            |
| Ion-type                |        | b <sup>++</sup> <sub>16</sub> -H <sub>2</sub> O | b <sup>++</sup> <sub>16</sub> | y <sup>+++</sup> <sub>20</sub> | b <sub>8</sub> |                                                                               |                                 | sty                        | y <sup>++</sup> <sub>13</sub> -H <sub>2</sub> O | y <sub>6</sub>     |              | y <sup>++</sup> <sub>13</sub> |                       |                         | b <sup>++</sup> <sub>18</sub> | y <sup>++</sup> <sub>16</sub> | b <sup>+++</sup> <sub>19</sub> | b <sup>++</sup> <sub>20</sub> -H <sub>2</sub> O | b <sup>++</sup> <sub>20</sub> |         | y <sub>8</sub> -NH <sub>3</sub> | b <sub>12</sub> |
| Delta Da                |        | 0.23                                            | 0.69                          | 0.21                           | 0.16           |                                                                               |                                 | 0.08                       | 0.14                                            | -0.13              |              | 0.26                          |                       |                         | 0.55                          | 0.58                          | -0.02                          | 0.18                                            | 0.57                          |         | 0.46                            | 0.62            |

# Peak 397

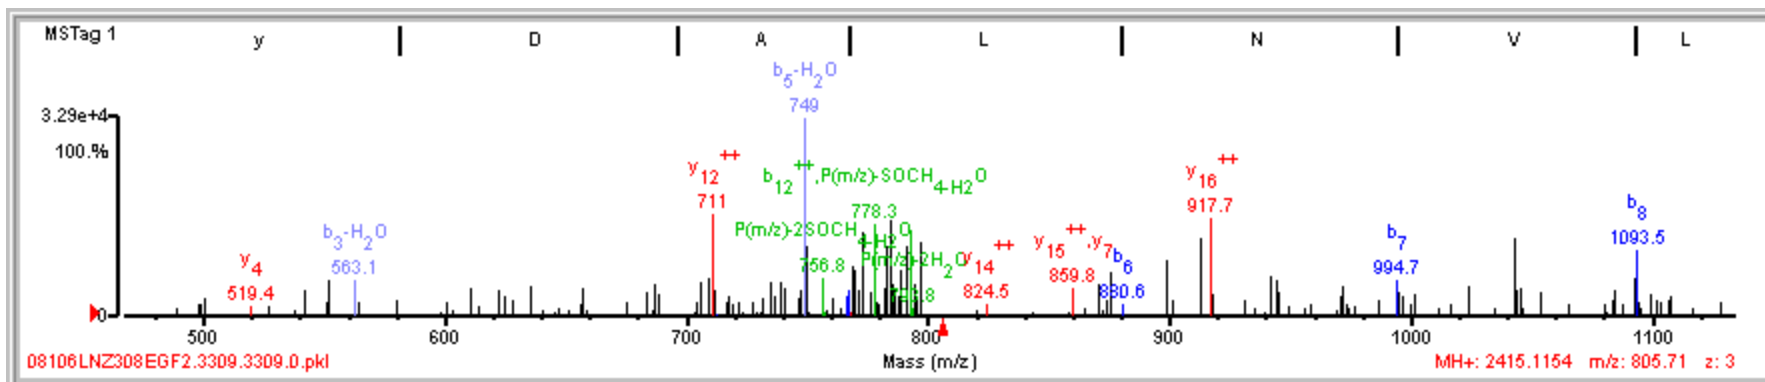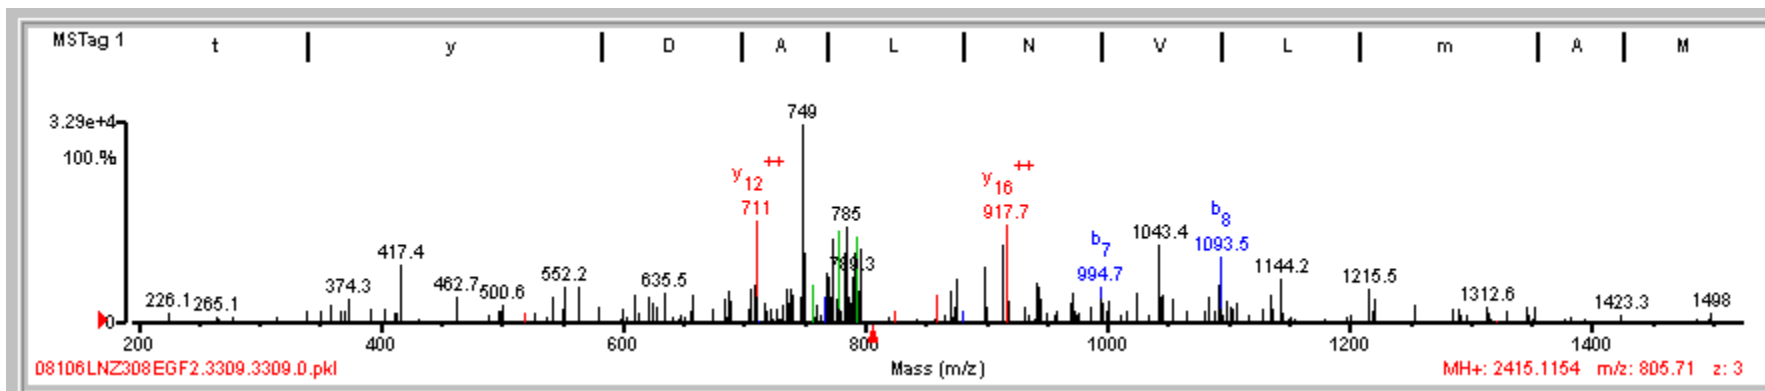

| Rank                    | Score | SPI (%)                       | BCS                              | # Unmatched Ions                                | Variable sites    | Sequence                                          | MH <sup>+</sup> Calculated (Da) | MH <sup>+</sup> Error (Da)    | MH <sup>+</sup> Error (ppm) | Protein MW/pl (Da)               | Species        | Accession #              | MS-Digest Index #     | Protein Name                             |
|-------------------------|-------|-------------------------------|----------------------------------|-------------------------------------------------|-------------------|---------------------------------------------------|---------------------------------|-------------------------------|-----------------------------|----------------------------------|----------------|--------------------------|-----------------------|------------------------------------------|
| 1                       | 10.00 | 100.0                         | 4                                | 0/10                                            | M112m T104t Y105y | (R) R t y / D A L N V \ L m A M N I I S R E K (K) | 2238.17                         | 176.9421                      | 420.1                       | 38429.3/5.96                     | Homo sapiens   | <a href="#">26024209</a> | <a href="#">31213</a> | transcription factor Dp family, member 3 |
| Fragment-ion (m/z)      |       | 711.04                        | 749.02                           | 769.32                                          | 772.90            | 778.33                                            | 785.02                          | 917.68                        | 994.69                      | 1043.36                          | 1093.51        |                          |                       |                                          |
| Frac. Inten. (% of TIC) |       | 14.31                         | 28.98                            | 13.12                                           | 0.27              | 0.39                                              | 0.61                            | 13.26                         | 8.57                        | 11.08                            | 9.43           |                          |                       |                                          |
| Rel. Inten. (% of BP)   |       | 49.37                         | 100.00                           | 45.26                                           | 0.93              | 1.33                                              | 2.09                            | 45.75                         | 29.57                       | 38.24                            | 32.54          |                          |                       |                                          |
| Score                   |       | 1.00                          | 0.50                             | 0.50                                            | 1.50              | 2.00                                              | 2.00                            | 1.00                          | 1.00                        | 0.50                             | 1.00           |                          |                       |                                          |
| Ion-type                |       | y <sup>++</sup> <sub>12</sub> | b <sub>5</sub> -H <sub>2</sub> O | b <sup>++</sup> <sub>12</sub> -H <sub>2</sub> O | sty               | b <sup>++</sup> <sub>12</sub>                     | m                               | y <sup>++</sup> <sub>16</sub> | b <sub>7</sub>              | y <sub>9</sub> -H <sub>2</sub> O | b <sub>8</sub> |                          |                       |                                          |
| Delta Da                |       | 0.15                          | -0.19                            | 0.02                                            | 0.19              | 0.02                                              | 0.98                            | 0.20                          | 0.35                        | -0.21                            | 0.10           |                          |                       |                                          |
|                         |       |                               |                                  |                                                 |                   | m                                                 |                                 |                               |                             |                                  |                |                          |                       |                                          |



# Peak 400

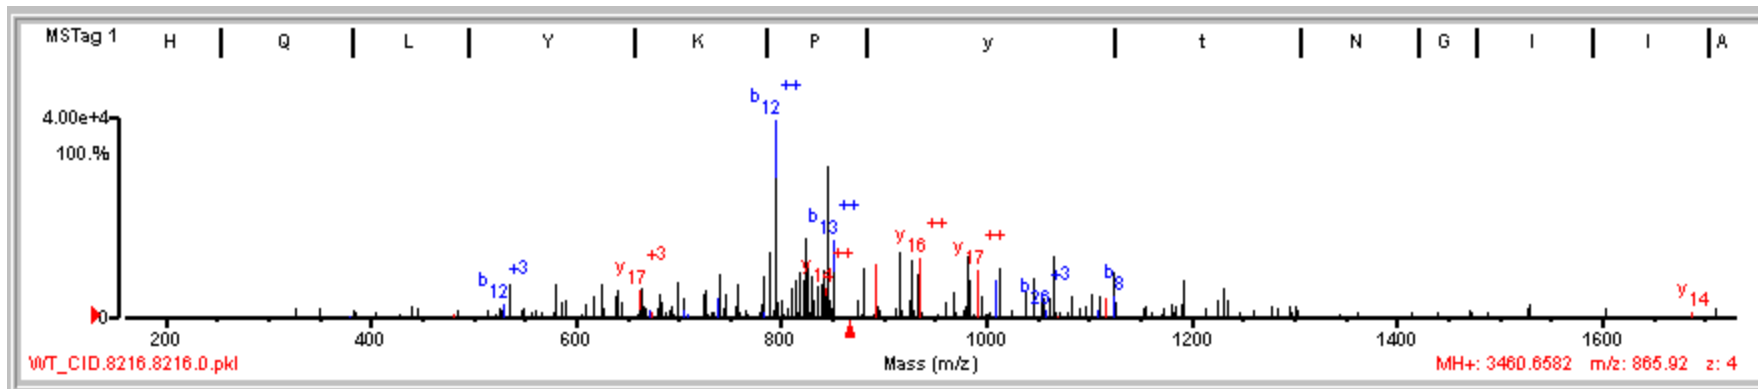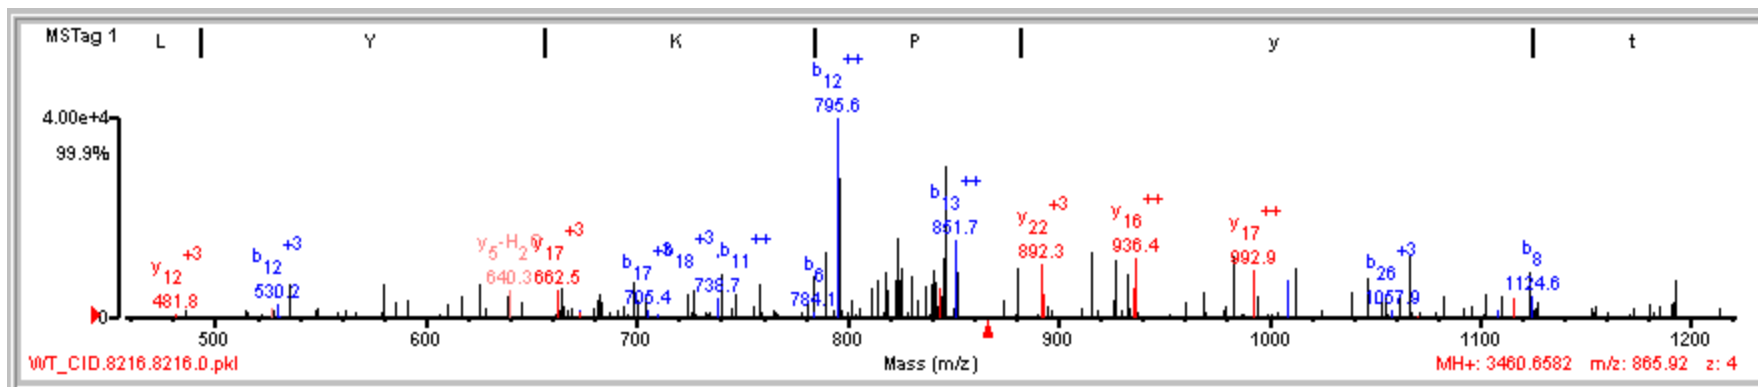

## Sequence Results

| Rank | Score | SPI (%) | BCS | # Unmatched Ions | Variable sites | Sequence                                                            | MH <sup>+</sup> Calculated (Da) | MH <sup>+</sup> Error (Da) | MH <sup>+</sup> Error (ppm) | Protein MW/pl (Da) | Species      | Accession # | MS-Digest Index # | Protein Name                               |
|------|-------|---------|-----|------------------|----------------|---------------------------------------------------------------------|---------------------------------|----------------------------|-----------------------------|--------------------|--------------|-------------|-------------------|--------------------------------------------|
| 1    | 11.66 | 59.3    | 10  | 10/25            | T77t Y76y      | (K)N H Q L Y K\ P\ y\ t N/G/I I\ A/K D P T S L E/E\ E I K E I R (R) | 3299.73                         | 160.9311                   | 288.5                       | 52071.4/9.28       | Homo sapiens | 30520329    | 1114              | lysophosphatidic acid acyltransferase zeta |

| Fragment-ion (m/z)     | 639.41                                       | 681.51                         | 699.10 | 740.94 | 783.75         | 789.73 | 795.60                         | 818.06 | 823.85 | 841.25 | 843.76                         | 845.66 | 846.58 | 851.68                         | 880.85         | 892.32                         | 915.84         | 927.64                                           | 933.32 | 936.43                         | 983.14                                           | 992.91                         | 1012.53 | 1066.90 | 1124.03        |
|------------------------|----------------------------------------------|--------------------------------|--------|--------|----------------|--------|--------------------------------|--------|--------|--------|--------------------------------|--------|--------|--------------------------------|----------------|--------------------------------|----------------|--------------------------------------------------|--------|--------------------------------|--------------------------------------------------|--------------------------------|---------|---------|----------------|
| Frac. Inten.(% of TIC) | 2.50                                         | 2.04                           | 2.65   | 2.12   | 2.42           | 4.55   | 17.38                          | 3.64   | 8.12   | 0.14   | 2.58                           | 2.86   | 8.07   | 5.95                           | 2.49           | 3.81                           | 3.17           | 2.77                                             | 2.63   | 3.28                           | 4.76                                             | 2.30                           | 2.44    | 3.64    | 3.69           |
| Rel. Inten.(% of BP)   | 14.41                                        | 11.77                          | 15.26  | 12.19  | 13.94          | 26.20  | 100.00                         | 20.92  | 46.72  | 0.81   | 14.85                          | 16.46  | 46.42  | 34.22                          | 14.34          | 21.91                          | 18.23          | 15.94                                            | 15.11  | 18.86                          | 27.41                                            | 13.24                          | 14.04   | 20.93   | 21.25          |
| Score                  | 0.50                                         | 1.00                           | -0.15  | -0.12  | 1.00           | -0.26  | 1.00                           | -0.21  | -0.47  | 1.50   | 1.00                           | -0.16  | -0.46  | 1.00                           | 1.00           | 1.00                           | 1.00           | 0.50                                             | -0.15  | 1.00                           | 0.50                                             | 1.00                           | -0.14   | -0.21   | 1.00           |
| Ion-type               | b <sub>5</sub> -NH <sub>3</sub> <sup>+</sup> | y <sup>+++</sup> <sub>18</sub> |        |        | b <sub>e</sub> |        | b <sup>+++</sup> <sub>12</sub> |        |        | sty    | y <sup>+++</sup> <sub>14</sub> |        |        | b <sup>+++</sup> <sub>13</sub> | b <sub>7</sub> | b <sup>+++</sup> <sub>22</sub> | y <sub>7</sub> | y <sup>+++</sup> <sub>16</sub> -H <sub>2</sub> O |        | y <sup>+++</sup> <sub>16</sub> | y <sup>+++</sup> <sub>17</sub> -H <sub>2</sub> O | y <sup>+++</sup> <sub>17</sub> |         |         | b <sub>8</sub> |
| Delta Da               | 0.12                                         | 0.47                           |        |        | -0.66          |        | 0.27                           |        |        | 0.07   | -0.19                          |        |        | -0.19                          | -0.61          | 0.58                           | -0.67          | 0.64                                             |        | 0.42                           | -0.41                                            | 0.36                           |         |         | -0.46          |

# Peak 401

Ions that verify assignment

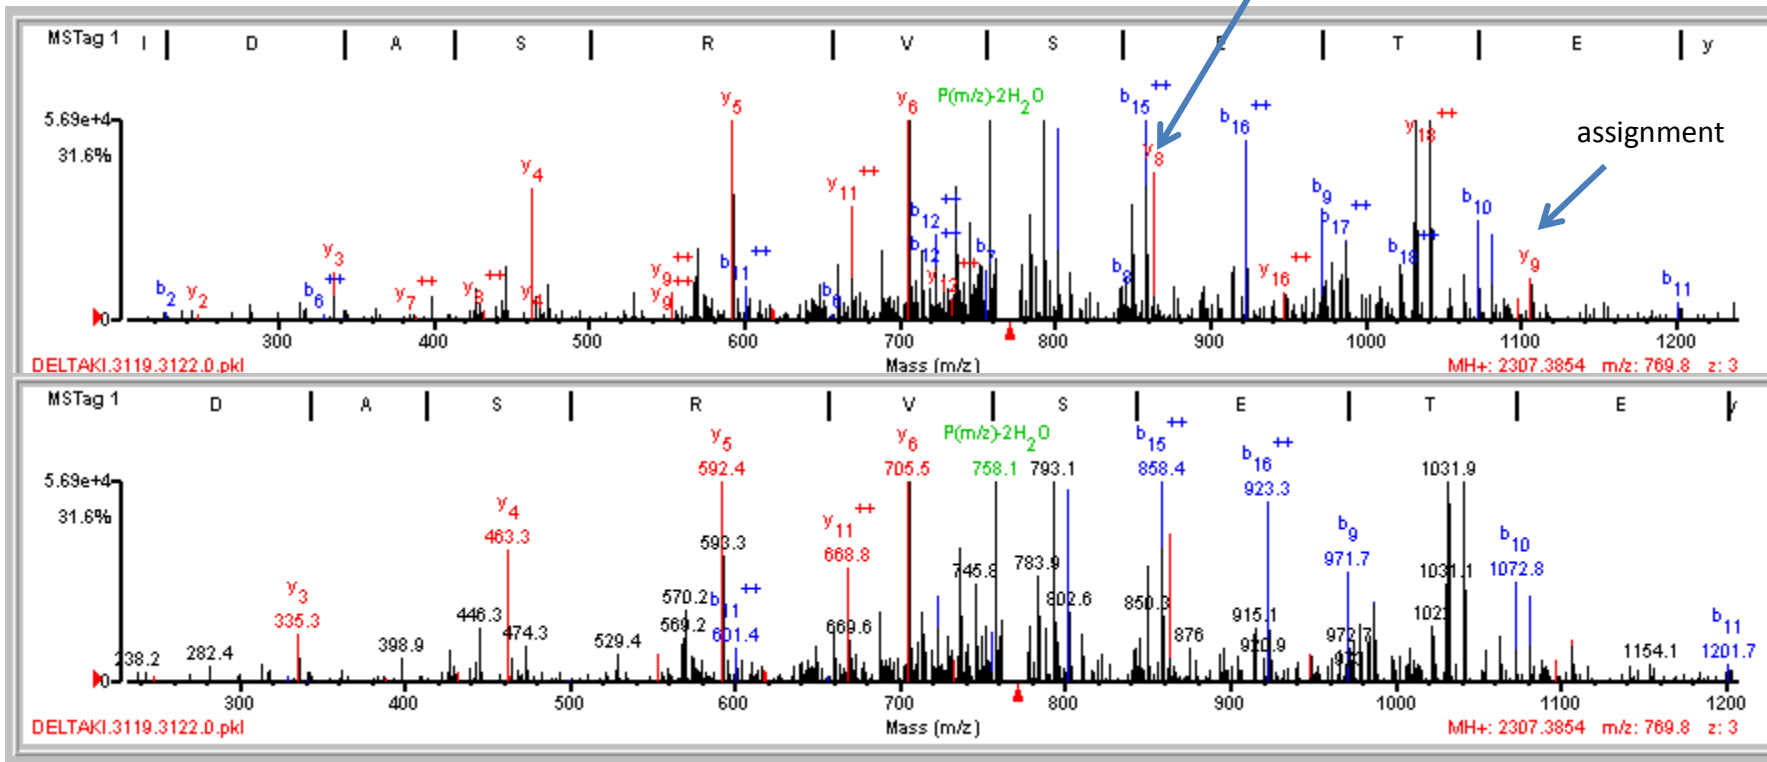

| Rank                    | Score          | SPI (%)        | BCS                           | # Unmatched Ions                | Variable sites | Sequence                                              | MH <sup>+</sup> Calculated (Da) | MH <sup>+</sup> Error (Da) | MH <sup>+</sup> Error (ppm) | Protein MW/pl (Da) | Species      | Accession #                                     | MS-Digest Index #             | Protein Name                                    |                               |        |                               |                |                               |                               |                                                 |                               |                 |                |
|-------------------------|----------------|----------------|-------------------------------|---------------------------------|----------------|-------------------------------------------------------|---------------------------------|----------------------------|-----------------------------|--------------------|--------------|-------------------------------------------------|-------------------------------|-------------------------------------------------|-------------------------------|--------|-------------------------------|----------------|-------------------------------|-------------------------------|-------------------------------------------------|-------------------------------|-----------------|----------------|
| 1                       | 16.64          | 89.9           | 10                            | 4/24                            | Y354y          | (K) L I D A S R V S E I T E / Y S A L E I Q S T K (-) | 2227.11                         | 80.2766                    | 134.5                       | 41493.0/7.52       | Homo sapiens | <a href="#">31083344</a>                        | <a href="#">1951</a>          | chemokine orphan receptor 1                     |                               |        |                               |                |                               |                               |                                                 |                               |                 |                |
| Fragment-ion (m/z)      | 463.33         | 592.37         | 668.83                        | 688.26                          | 705.51         | 714.00                                                | 722.88                          | 736.42                     | 745.83                      | 752.52             | 783.94       | 793.11                                          | 802.14                        | 849.76                                          | 858.39                        | 863.66 | 923.34                        | 971.69         | 987.41                        | 1030.80                       | 1031.91                                         | 1041.15                       | 1072.76         | 1106.44        |
| Frac. Inten. (% of TIC) | 1.92           | 8.72           | 2.98                          | 1.89                            | 11.75          | 2.53                                                  | 2.92                            | 3.32                       | 2.39                        | 1.87               | 2.50         | 11.12                                           | 4.46                          | 2.56                                            | 7.05                          | 2.43   | 3.66                          | 2.74           | 2.53                          | 2.04                          | 7.85                                            | 6.72                          | 2.22            | 1.83           |
| Rel. Inten. (% of BP)   | 16.31          | 74.22          | 25.35                         | 16.12                           | 100.00         | 21.48                                                 | 24.86                           | 28.25                      | 20.31                       | 15.95              | 21.26        | 94.57                                           | 37.93                         | 21.79                                           | 59.94                         | 20.64  | 31.17                         | 23.34          | 21.53                         | 17.33                         | 66.79                                           | 57.17                         | 18.90           | 15.53          |
| Score                   | 1.00           | 1.00           | 1.00                          | 0.50                            | 1.00           | 0.50                                                  | 1.00                            | -0.28                      | -0.20                       | -0.16              | -0.21        | 0.50                                            | 1.00                          | 0.50                                            | 1.00                          | 1.00   | 1.00                          | 1.00           | 1.00                          | 1.00                          | 0.50                                            | 1.00                          | 1.00            | 1.00           |
| Ion-type                | y <sub>4</sub> | y <sub>5</sub> | y <sup>++</sup> <sub>11</sub> | y <sub>6</sub> -NH <sub>3</sub> | y <sub>6</sub> | b <sup>++</sup> <sub>12</sub> -H <sub>2</sub> O       | b <sup>++</sup> <sub>12</sub>   |                            |                             |                    |              | b <sup>++</sup> <sub>14</sub> -H <sub>2</sub> O | b <sup>++</sup> <sub>14</sub> | b <sup>++</sup> <sub>15</sub> -H <sub>2</sub> O | b <sup>++</sup> <sub>15</sub> |        | b <sup>++</sup> <sub>16</sub> | b <sub>9</sub> | b <sup>++</sup> <sub>17</sub> | b <sup>++</sup> <sub>18</sub> | y <sup>++</sup> <sub>18</sub> -H <sub>2</sub> O | y <sup>++</sup> <sub>18</sub> | b <sub>10</sub> | y <sub>9</sub> |
| Delta Da                | 0.08           | 0.08           | 0.04                          | -0.09                           | 0.13           | 0.18                                                  | 0.06                            |                            |                             |                    |              | 0.26                                            | 0.28                          | 0.37                                            | -0.01                         | 0.21   | 0.42                          | 0.17           | 0.46                          | 0.34                          | -0.04                                           | 0.19                          | 0.20            | -0.04          |

# Peak 403

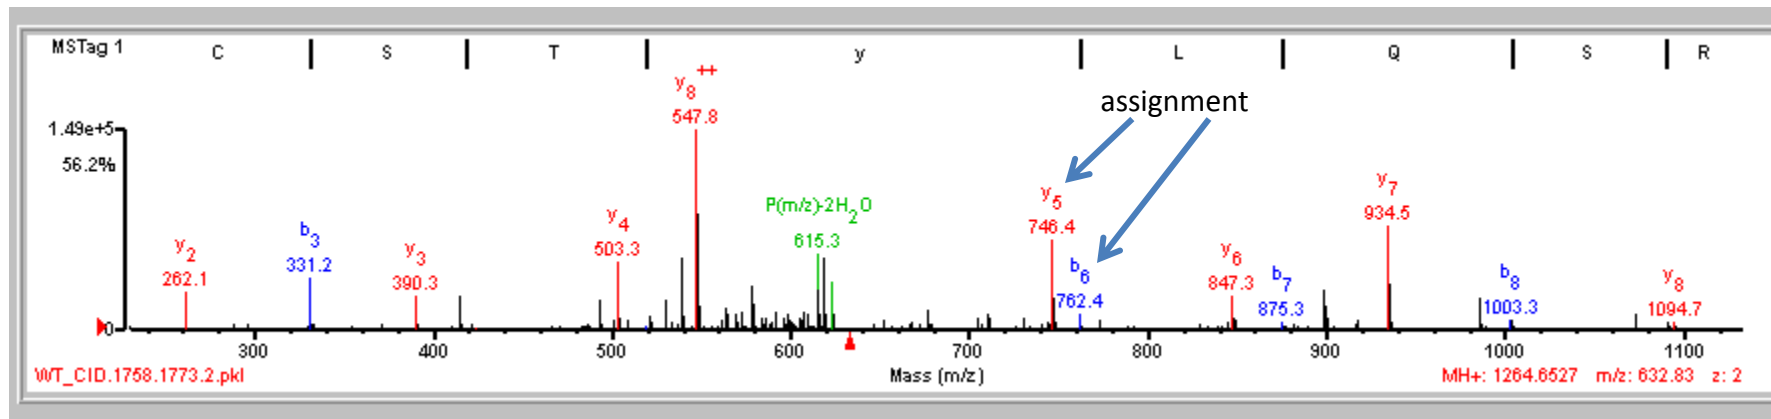

| Rank                    | Score          | SPI (%)        | BCS            | # Unmatched Ions | Variable sites | Sequence                    | MH <sup>+</sup> Calculated (Da) | MH <sup>+</sup> Error (Da)                     | MH <sup>+</sup> Error (ppm)                    | Protein MW/pi (Da)           | Species      | Accession #               | MS-Digest Index #     | Protein Name                                       |        |        |        |        |                |                |                |        |                |                                  |                |
|-------------------------|----------------|----------------|----------------|------------------|----------------|-----------------------------|---------------------------------|------------------------------------------------|------------------------------------------------|------------------------------|--------------|---------------------------|-----------------------|----------------------------------------------------|--------|--------|--------|--------|----------------|----------------|----------------|--------|----------------|----------------------------------|----------------|
| 1                       | 10.14          | 67.2           | 7              | 12/25            | Y352y          | (K) A V/C S/T/Y L/Q S R (Y) | 1184.57                         | 80.0799                                        | 89.8                                           | 130843.3/8.48                | Homo sapiens | <a href="#">38201640</a>  | <a href="#">5543</a>  | homeodomain-interacting protein kinase 1 isoform 1 |        |        |        |        |                |                |                |        |                |                                  |                |
| 1                       | 10.14          | 67.2           | 7              | 12/25            | Y361y          | (K) A V/C S/T/Y L/Q S R (Y) | 1184.57                         | 80.0799                                        | 89.8                                           | 50858.9/8.94                 | Homo sapiens | <a href="#">169171014</a> | <a href="#">15840</a> | PREDICTED: hypothetical protein                    |        |        |        |        |                |                |                |        |                |                                  |                |
| 1                       | 10.14          | 67.2           | 7              | 12/25            | Y352y          | (K) A V/C S/T/Y L/Q S R (Y) | 1184.57                         | 80.0799                                        | 89.8                                           | 116732.1/8.07                | Homo sapiens | <a href="#">38201638</a>  | <a href="#">36208</a> | homeodomain-interacting protein kinase 1 isoform 2 |        |        |        |        |                |                |                |        |                |                                  |                |
| Fragment-ion (m/z)      | 262.10         | 331.22         | 390.30         | 415.31           | 493.33         | 503.28                      | 529.86                          | 538.84                                         | 539.32                                         | 547.76                       | 564.47       | 573.12                    | 578.35                | 598.87                                             | 605.15 | 619.36 | 677.12 | 710.48 | 746.35         | 762.42         | 847.27         | 898.33 | 934.48         | 985.49                           | 1003.31        |
| Frac. Inten. (% of TIC) | 1.93           | 3.20           | 2.26           | 1.99             | 2.48           | 4.19                        | 3.52                            | 2.59                                           | 5.21                                           | 24.08                        | 2.18         | 1.34                      | 5.65                  | 1.82                                               | 1.35   | 4.33   | 1.70   | 2.34   | 6.51           | 1.31           | 3.51           | 4.09   | 8.29           | 2.73                             | 1.37           |
| Rel. Inten. (% of BP)   | 8.03           | 13.30          | 9.40           | 8.26             | 10.31          | 17.39                       | 14.63                           | 10.76                                          | 21.62                                          | 100.00                       | 9.07         | 5.56                      | 23.47                 | 7.58                                               | 5.61   | 17.99  | 7.04   | 9.71   | 27.01          | 5.44           | 14.58          | 17.00  | 34.43          | 11.34                            | 5.69           |
| Score                   | 1.00           | 1.00           | 1.00           | -0.08            | -0.10          | 1.00                        | -0.15                           | 0.50                                           | 0.50                                           | 1.00                         | -0.09        | -0.06                     | -0.23                 | -0.08                                              | -0.06  | -0.18  | -0.07  | -0.10  | 1.00           | 1.00           | 1.00           | -0.17  | 1.00           | 0.50                             | 1.00           |
| Ion-type                | y <sub>2</sub> | b <sub>3</sub> | a <sub>4</sub> |                  |                | y <sub>4</sub>              |                                 | y <sup>++</sup> <sub>8</sub> -H <sub>2</sub> O | y <sup>++</sup> <sub>8</sub> -H <sub>2</sub> O | y <sup>++</sup> <sub>8</sub> |              |                           |                       |                                                    |        |        |        |        | y <sub>5</sub> | b <sub>6</sub> | a <sub>7</sub> |        | y <sub>7</sub> | b <sub>8</sub> -H <sub>2</sub> O | b <sub>8</sub> |
| Delta Da                | -0.05          | 0.08           | 0.12           |                  |                | -0.01                       |                                 | 0.12                                           | 0.60                                           | 0.04                         |              |                           |                       |                                                    |        |        |        |        | 0.03           | 0.17           | -0.07          |        | 0.08           | 0.11                             | -0.09          |



# Peak 404

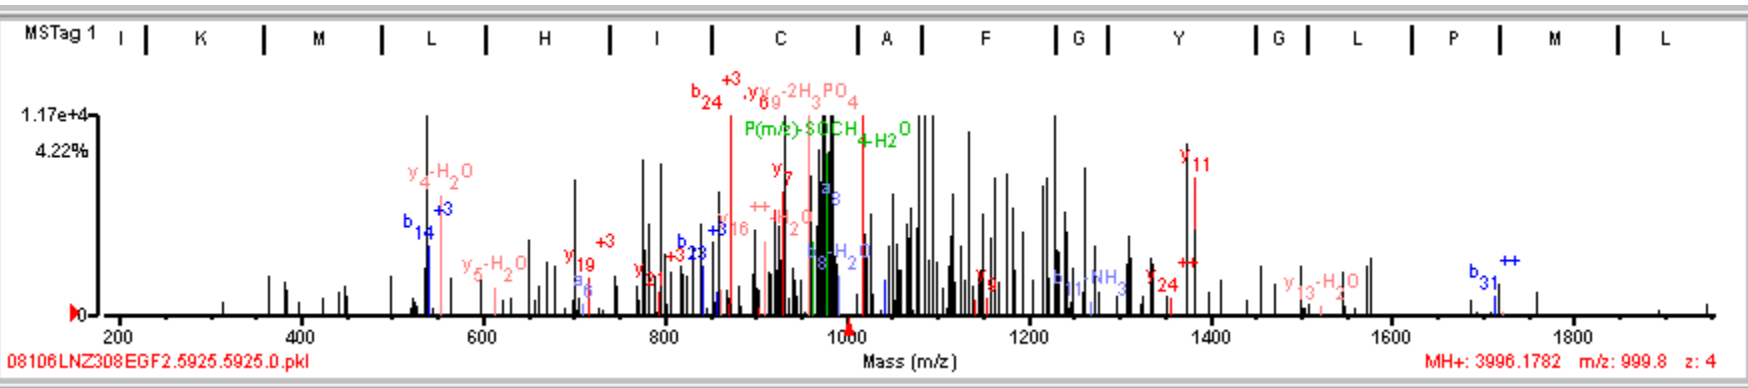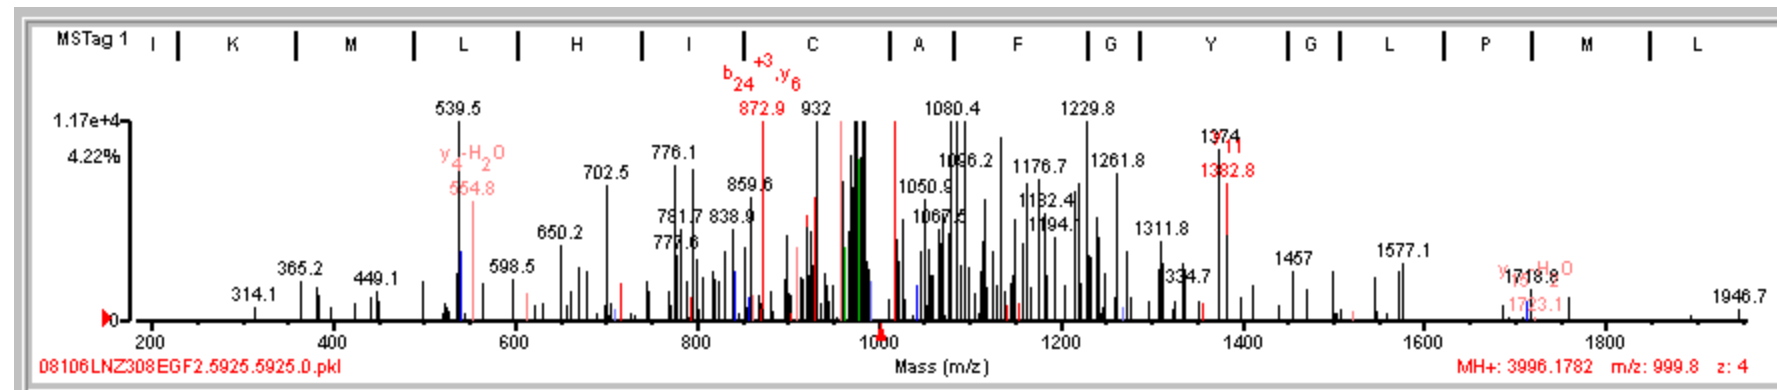

| Rank | Score | SPI (%) | BCS | # Unmatched Ions | Variable sites | Sequence                                                                         | MH* Calculated (Da) | MH* Error (Da) | MH* Error (ppm) | Protein MW/pi (Da) | Species      | Accession #              | MS-Digest Index #     | Protein Name                                                             |
|------|-------|---------|-----|------------------|----------------|----------------------------------------------------------------------------------|---------------------|----------------|-----------------|--------------------|--------------|--------------------------|-----------------------|--------------------------------------------------------------------------|
| 1    | 10.35 | 78.2    | 7   | 7/17             | M738m Y736y    | (R)N I K N L R I C A F G Y G L P M L V V V I S A S V Q P Q / G / y G m H N R (C) | 3900.99             | 95.1885        | -193.4          | 97684.0/6.42       | Homo sapiens | <a href="#">40807489</a> | <a href="#">10072</a> | egf-like module containing, mucin-like, hormone receptor-like sequence 1 |

  

| Fragment-ion (m/z)      | 539.51 | 776.06 | 872.89 | 920.46             | 930.71            | 959.51         | 973.36             | 976.59 | 981.25             | 983.18         | 1019.11           | 1080.45 | 1085.49 | 1220.83                             | 1229.83           | 1241.12 | 1382.82         |
|-------------------------|--------|--------|--------|--------------------|-------------------|----------------|--------------------|--------|--------------------|----------------|-------------------|---------|---------|-------------------------------------|-------------------|---------|-----------------|
| Frac. Inten. (% of TIC) | 4.54   | 2.29   | 2.54   | 2.29               | 3.31              | 2.74           | 54.14              | 3.50   | 2.49               | 0.20           | 3.92              | 2.71    | 3.81    | 2.44                                | 4.47              | 2.44    | 2.36            |
| Rel. Inten. (% of BP)   | 8.39   | 4.23   | 4.70   | 4.23               | 6.11              | 5.07           | 100.00             | 6.46   | 4.69               | 0.38           | 7.23              | 5.01    | 6.68    | 4.51                                | 8.26              | 4.51    | 4.35            |
| Score                   | 1.00   | 1.00   | 1.00   | 1.00               | 1.00              | -0.05          | 1.00               | -0.06  | 1.00               | 2.00           | 1.00              | -0.05   | -0.07   | 0.50                                | 1.00              | -0.05   | 1.00            |
| Ion-type                |        |        |        | b+++ <sub>14</sub> | y++ <sub>15</sub> | y <sub>7</sub> | y+++ <sub>28</sub> |        | b+++ <sub>27</sub> | a <sub>3</sub> | y++ <sub>11</sub> |         |         | b++ <sub>22</sub> -H <sub>2</sub> O | b++ <sub>22</sub> |         | y <sub>11</sub> |
| Delta Da                |        |        |        | 0.42               | 0.05              | 0.38           | 0.56               |        | 0.72               | 0.65           | -0.37             |         |         | 0.67                                | 0.67              |         | 0.25            |
|                         |        |        |        | y <sub>5</sub>     |                   |                |                    |        | 2.00               | m              |                   |         |         |                                     |                   |         |                 |
|                         |        |        |        | -0.42              |                   |                |                    |        |                    | -0.81          |                   |         |         |                                     |                   |         |                 |

# Peak 405

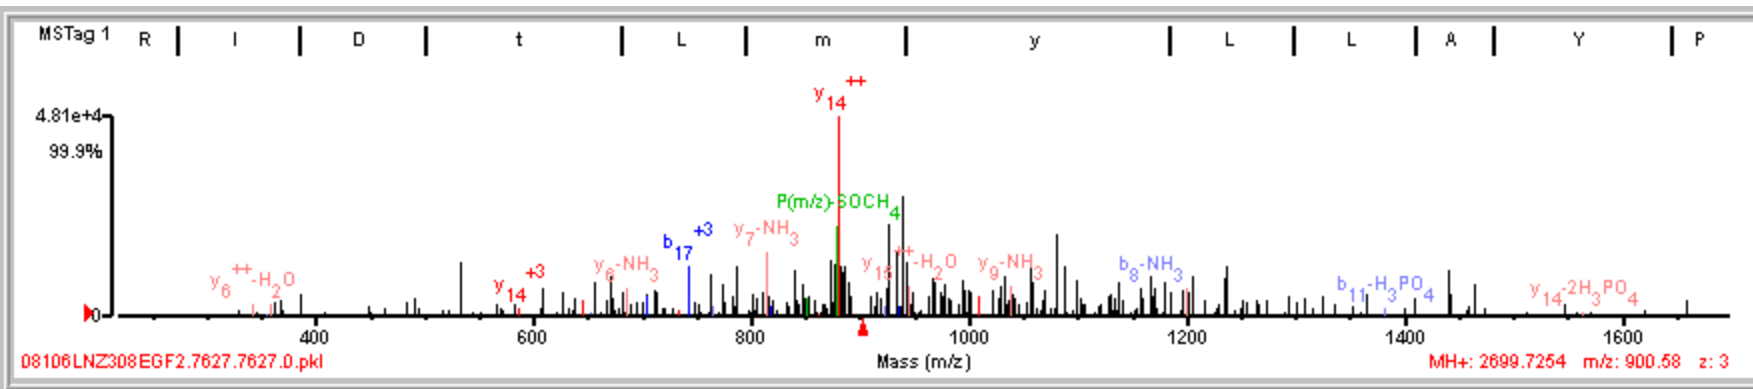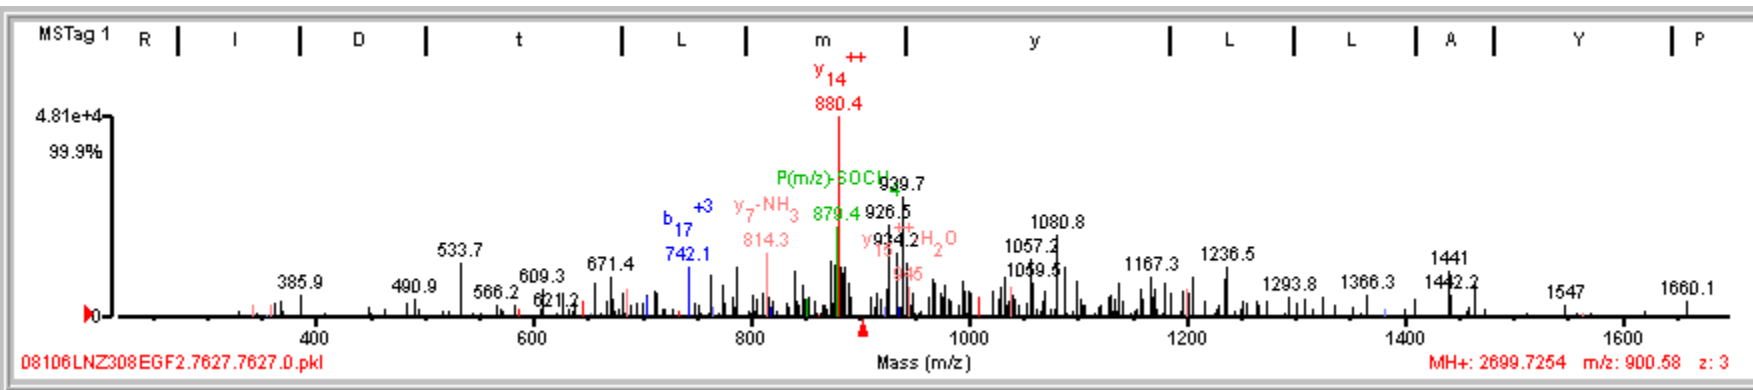

| Rank                    | Score  | SPI (%)                          | BCS                             | # Unmatched ions                  | Variable sites    | Sequence                                         | MH+ Calculated (Da)                             | MH+ Error (Da)                | MH+ Error (ppm) | Protein MW/pI (Da) | Species        | Accession #              | MS-Digest Index #    | Protein Name                                      |         |
|-------------------------|--------|----------------------------------|---------------------------------|-----------------------------------|-------------------|--------------------------------------------------|-------------------------------------------------|-------------------------------|-----------------|--------------------|----------------|--------------------------|----------------------|---------------------------------------------------|---------|
| 1                       | 6.81   | 71.3                             | 3                               | 5/15                              | M709m T707t Y710y | (R)N R I D t L m y L L A Y P Q K P M V K T K (T) | 2523.38                                         | 176.3429                      | 153.8           | 127819.8/8.77      | Homo sapiens   | <a href="#">42476127</a> | <a href="#">3369</a> | polymerase (RNA) III (DNA directed) polypeptide B |         |
| Fragment-ion (m/z)      | 671.39 | 774.84                           | 814.32                          | 876.97                            | 879.38            | 880.39                                           | 926.51                                          | 934.25                        | 939.74          | 995.06             | 1057.18        | 1080.84                  | 1087.64              | 1166.55                                           | 1441.04 |
| Frac. Inten. (% of TIC) | 6.36   | 4.59                             | 4.87                            | 8.64                              | 0.20              | 19.92                                            | 7.41                                            | 5.54                          | 9.08            | 5.14               | 5.94           | 6.47                     | 5.25                 | 5.10                                              | 5.48    |
| Rel. Inten. (% of BP)   | 31.95  | 23.04                            | 24.46                           | 43.38                             | 1.02              | 100.00                                           | 37.20                                           | 27.82                         | 45.59           | 25.79              | 29.83          | 32.47                    | 26.36                | 25.61                                             | 27.50   |
| Score                   | -0.32  | 0.50                             | 0.50                            | 0.25                              | 2.00              | 1.00                                             | 0.50                                            | 1.00                          | 1.00            | -0.26              | 1.00           | -0.32                    | -0.26                | 0.50                                              | -0.28   |
| Ion-type                |        | b <sub>6</sub> -H <sub>2</sub> O | y <sub>7</sub> -NH <sub>3</sub> | b <sub>7</sub> -SOCH <sub>4</sub> | m                 | y <sup>++</sup> <sub>14</sub>                    | b <sup>++</sup> <sub>14</sub> -H <sub>2</sub> O | b <sup>++</sup> <sub>14</sub> | b <sub>7</sub>  |                    | y <sub>9</sub> |                          |                      | b <sub>8</sub> -NH <sub>3</sub>                   |         |
| Delta Da                |        | -0.51                            | -0.17                           | 0.57                              | 0.27              | -0.07                                            | 0.61                                            | -0.66                         | -0.66           |                    | 0.56           |                          |                      | 0.15                                              |         |



# Peak 407

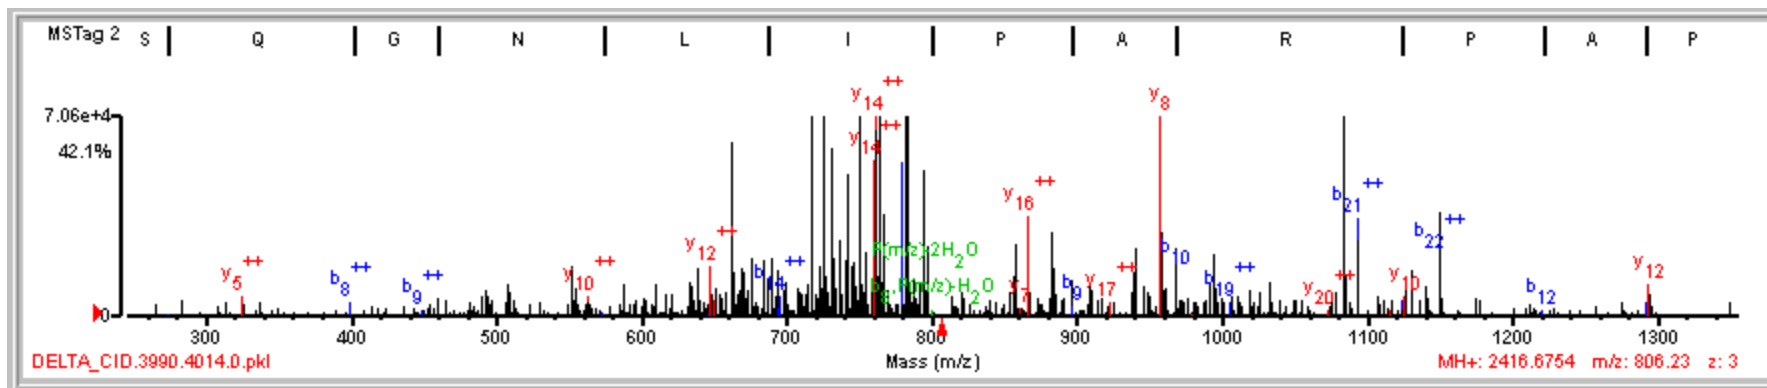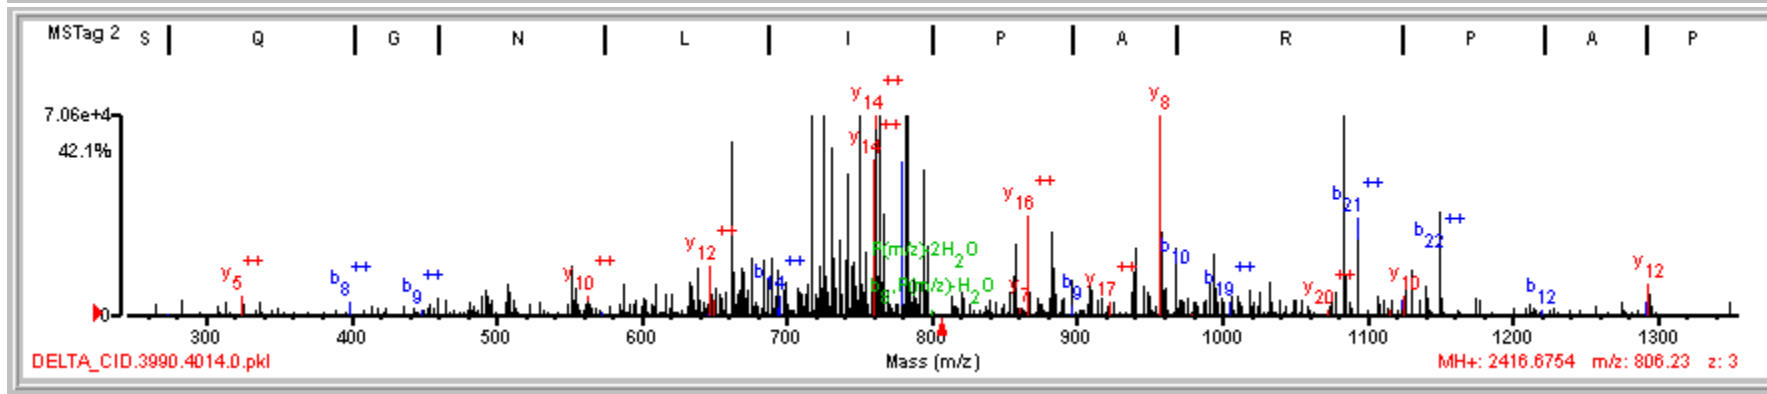

| Rank                    | Score             | SPI (%) | BCS    | # Unmatched Ions  | Variable sites    | Sequence                                                    | MH* Calculated (Da) | MH* Error (Da) | MH* Error (ppm) | Protein MW/pi (Da) | Species        | Accession #             | MS-Digest Index #     | Protein Name                                       |                                 |                                     |                   |        |                                  |                |                 |                                     |                   |                   |
|-------------------------|-------------------|---------|--------|-------------------|-------------------|-------------------------------------------------------------|---------------------|----------------|-----------------|--------------------|----------------|-------------------------|-----------------------|----------------------------------------------------|---------------------------------|-------------------------------------|-------------------|--------|----------------------------------|----------------|-----------------|-------------------------------------|-------------------|-------------------|
| 1                       | 13.33             | 76.5    | 9      | 6/24              | Y815y             | (K) V S S Q G N L I P A I R P A P A I P V L Y S S V L T (-) | 2336.26             | 80.4146        | 185.5           | 90556.6/7.71       | Homo sapiens   | <a href="#">4501915</a> | <a href="#">12669</a> | ADAM metallopeptidase domain 9 isoform 1 precursor |                                 |                                     |                   |        |                                  |                |                 |                                     |                   |                   |
| Fragment-ion (m/z)      | 646.88            | 661.91  | 717.40 | 725.95            | 730.88            | 736.62                                                      | 741.75              | 750.25         | 760.86          | 761.12             | 763.82         | 766.69                  | 779.20                | 781.79                                             | 782.72                          | 857.40                              | 866.15            | 882.85 | 939.43                           | 957.38         | 967.56          | 1083.85                             | 1092.95           | 1149.73           |
| Frac. Inten. (% of TIC) | 2.01              | 4.24    | 4.91   | 5.17              | 8.14              | 1.78                                                        | 3.66                | 5.74           | 2.21            | 9.85               | 6.23           | 1.74                    | 2.53                  | 1.82                                               | 10.82                           | 2.98                                | 1.84              | 3.13   | 1.78                             | 5.21           | 1.88            | 6.10                                | 3.36              | 2.92              |
| Rel. Inten. (% of BP)   | 18.01             | 39.14   | 45.35  | 47.74             | 75.20             | 16.49                                                       | 33.85               | 52.99          | 20.38           | 91.02              | 57.59          | 16.09                   | 23.39                 | 16.77                                              | 100.00                          | 27.32                               | 16.99             | 28.98  | 16.43                            | 48.11          | 17.16           | 56.32                               | 31.05             | 26.97             |
| Score                   | 1.00              | -0.39   | -0.45  | 1.00              | 1.00              | -0.16                                                       | -0.34               | -0.53          | 1.00            | 1.00               | 1.00           | 1.00                    | 1.00                  | 0.50                                               | 0.50                            | 0.50                                | 1.00              | -0.29  | 0.50                             | 1.00           | 1.00            | 0.50                                | 1.00              | 1.00              |
| Ion-type                | b++ <sub>13</sub> |         |        | y++ <sub>13</sub> | b++ <sub>15</sub> |                                                             |                     |                |                 | y++ <sub>14</sub>  | y <sub>5</sub> | b+++ <sub>22</sub>      | b++ <sub>16</sub>     | b <sub>2</sub> -NH <sub>3</sub>                    | b <sub>2</sub> -NH <sub>3</sub> | y++ <sub>16</sub> -H <sub>2</sub> O | y++ <sub>16</sub> |        | a <sub>10</sub>                  | y <sub>3</sub> | b <sub>10</sub> | b++ <sub>21</sub> -H <sub>2</sub> O | b++ <sub>21</sub> | b++ <sub>22</sub> |
| Delta Da                | 0.52              |         |        | 0.59              | 0.48              |                                                             |                     |                |                 | -0.02              | 0.24           | 0.49                    | 0.30                  | 0.27                                               | -0.81                           | 0.32                                | 0.48              | 0.20   | -0.10                            | -0.05          | 0.04            | 0.31                                | 0.40              | 0.64              |
|                         |                   |         |        |                   |                   |                                                             |                     |                |                 |                    |                |                         |                       |                                                    |                                 |                                     |                   |        | y <sub>8</sub> -H <sub>2</sub> O |                |                 |                                     |                   |                   |
|                         |                   |         |        |                   |                   |                                                             |                     |                |                 |                    |                |                         |                       |                                                    |                                 |                                     |                   |        | 0.01                             |                |                 |                                     |                   |                   |

# Peak 408

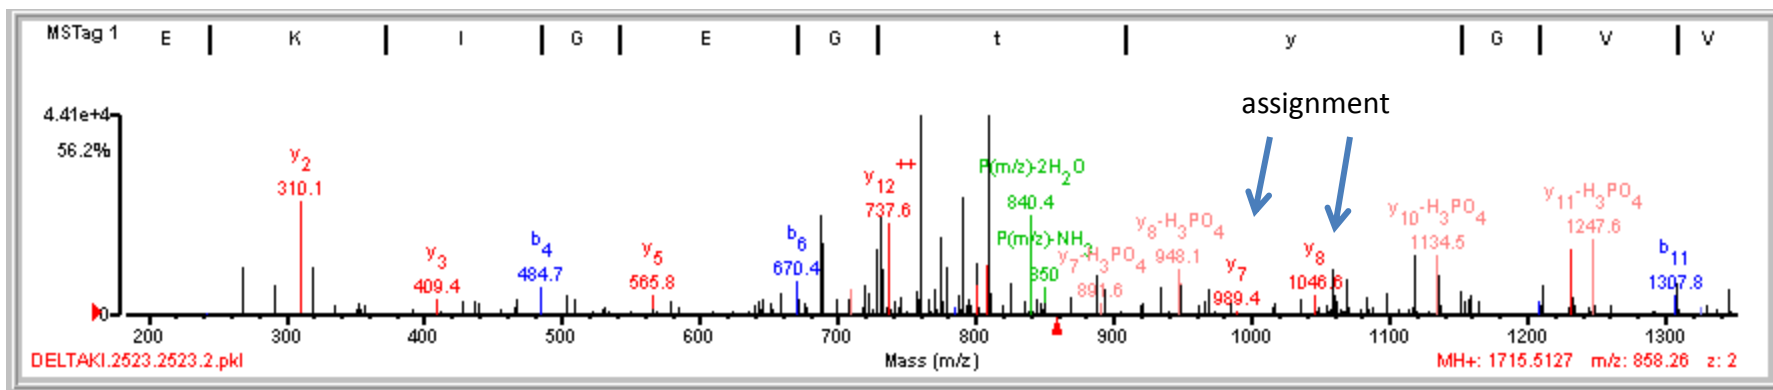

| Rank | Score | SPI (%) | BCS | # Unmatched Ions | Variable sites | Sequence                            | MH <sup>+</sup> Calculated (Da) | MH <sup>+</sup> Error (Da) | MH <sup>+</sup> Error (ppm) | Protein MW/pi (Da) | Species      | Accession #              | MS-Digest Index #     | Protein Name                            |
|------|-------|---------|-----|------------------|----------------|-------------------------------------|---------------------------------|----------------------------|-----------------------------|--------------------|--------------|--------------------------|-----------------------|-----------------------------------------|
| 1    | 6.27  | 63.1    | 4   | 4/16             | T14t Y15y      | (K) I E/K I/G E\G t y G V V/Y K (G) | 1555.84                         | 159.6761                   | -149.6                      | 34095.6/8.37       | Homo sapiens | <a href="#">4502709</a>  | <a href="#">3565</a>  | cell division cycle 2 protein isoform 1 |
| 1    | 6.27  | 63.1    | 4   | 4/16             | T14t Y15y      | (K) I E/K I/G E\G t y G V V/Y K (G) | 1555.84                         | 159.6761                   | -149.6                      | 27502.9/6.54       | Homo sapiens | <a href="#">16306492</a> | <a href="#">13150</a> | cell division cycle 2 protein isoform 2 |

| Fragment-ion (m/z)     | 310.13         | 670.44         | 688.34 | 728.47                                          | 730.72 | 737.65                        | 760.26 | 774.50 | 791.25                          | 800.62 | 809.56 | 948.14                                         | 1059.65 | 1134.54                                         | 1232.45         | 1247.64                                         |
|------------------------|----------------|----------------|--------|-------------------------------------------------|--------|-------------------------------|--------|--------|---------------------------------|--------|--------|------------------------------------------------|---------|-------------------------------------------------|-----------------|-------------------------------------------------|
| Frac. Inten.(% of TIC) | 9.06           | 5.13           | 16.51  | 6.20                                            | 7.87   | 8.29                          | 0.72   | 6.09   | 0.27                            | 0.21   | 1.14   | 8.56                                           | 6.39    | 8.13                                            | 8.30            | 7.13                                            |
| Rel. Inten.(% of BP)   | 54.90          | 31.06          | 100.00 | 37.56                                           | 47.70  | 50.20                         | 4.36   | 36.91  | 1.66                            | 1.28   | 6.89   | 51.86                                          | 38.71   | 49.23                                           | 50.29           | 43.22                                           |
| Score                  | 1.00           | 1.00           | -1.00  | 0.50                                            | -0.48  | 1.00                          | 1.00   | -0.37  | 1.00                            |        | 1.50   | 0.25                                           | -0.39   | 0.50                                            | 1.00            | 0.25                                            |
| Ion-type               | y <sub>2</sub> | b <sub>6</sub> |        | y <sup>++</sup> <sub>12</sub> -H <sub>2</sub> O |        | y <sup>++</sup> <sub>12</sub> | st     |        | y <sub>6</sub> -NH <sub>3</sub> | st     | sty    | y <sub>8</sub> -H <sub>3</sub> PO <sub>4</sub> |         | b <sub>8</sub> -NH <sub>3</sub>                 | y <sub>10</sub> | y <sub>11</sub> -H <sub>3</sub> PO <sub>4</sub> |
| Delta Da               | -0.05          | 0.06           |        | 0.15                                            |        | 0.33                          | -0.15  |        | -0.09                           |        | 0.16   | -0.28                                          |         | 0.12                                            | -0.01           | 0.07                                            |
|                        |                |                |        |                                                 |        |                               |        |        | st                              |        |        |                                                |         | y <sub>10</sub> -H <sub>3</sub> PO <sub>4</sub> |                 | 0.05                                            |









# Peak 414

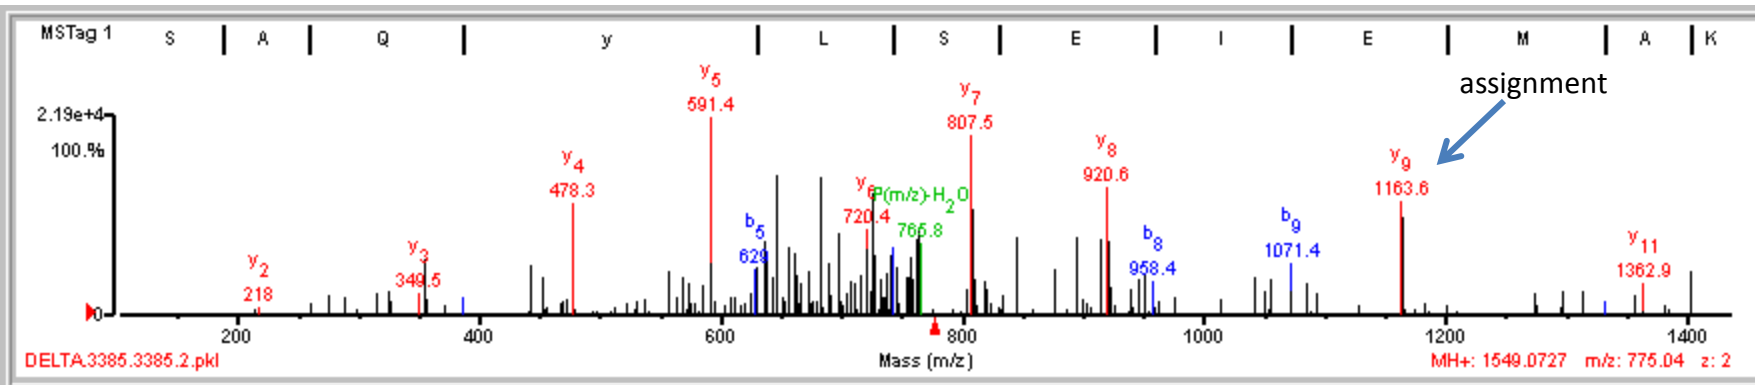

| Rank | Score | SPI (%) | BCS | # Unmatched Ions | Variable sites | Sequence                          | MH <sup>+</sup> Calculated (Da) | MH <sup>+</sup> Error (Da) | MH <sup>+</sup> Error (ppm) | Protein MW/pI (Da) | Species      | Accession #             | MS-Digest Index #     | Protein Name |
|------|-------|---------|-----|------------------|----------------|-----------------------------------|---------------------------------|----------------------------|-----------------------------|--------------------|--------------|-------------------------|-----------------------|--------------|
| 1    | 11.74 | 83.4    | 9   | 3/15             | Y203y          | (K) V/S/A/Q/Y L/S/E/I E M A K (A) | 1468.74                         | 80.3375                    | 239.6                       | 47355.5/7.08       | Homo sapiens | <a href="#">5031699</a> | <a href="#">25762</a> | flotillin 1  |

| Fragment-ion (m/z)      | 478.28         | 591.42         | 629.01         | 637.33                                          | 646.94                        | 661.32 | 682.31                        | 720.41         | 725.38                          | 741.56 | 762.69 | 807.50         | 920.63         | 1071.41        | 1163.59        |
|-------------------------|----------------|----------------|----------------|-------------------------------------------------|-------------------------------|--------|-------------------------------|----------------|---------------------------------|--------|--------|----------------|----------------|----------------|----------------|
| Frac. Inten. (% of TIC) | 4.86           | 10.27          | 3.89           | 5.49                                            | 6.85                          | 4.21   | 8.95                          | 7.00           | 0.30                            | 5.29   | 7.12   | 13.15          | 9.92           | 3.38           | 9.34           |
| Rel. Inten. (% of BP)   | 36.93          | 78.04          | 29.57          | 41.73                                           | 52.06                         | 32.04  | 68.02                         | 53.18          | 2.26                            | 40.20  | 54.14  | 100.00         | 75.43          | 25.68          | 70.99          |
| Score                   | 1.00           | 1.00           | 1.00           | 0.50                                            | 1.00                          | -0.32  | 1.00                          | 1.00           | 1.50                            | -0.40  | -0.54  | 1.00           | 1.00           | 1.00           | 1.00           |
| Ion-type                | y <sub>4</sub> | y <sub>5</sub> | b <sub>5</sub> | y <sup>++</sup> <sub>10</sub> -H <sub>2</sub> O | y <sup>++</sup> <sub>10</sub> |        | y <sup>++</sup> <sub>11</sub> | y <sub>6</sub> | b <sub>6</sub> -NH <sub>3</sub> |        |        | y <sub>7</sub> | y <sub>8</sub> | b <sub>9</sub> | y <sub>9</sub> |
| Delta Da                | 0.05           | 0.10           | -0.22          | 0.05                                            | 0.65                          |        | 0.51                          | 0.05           | 0.09                            |        |        | 0.11           | 0.15           | -0.07          | 0.08           |
|                         |                |                |                |                                                 |                               |        |                               |                | y <sup>++</sup> <sub>12</sub>   |        |        |                |                |                |                |
|                         |                |                |                |                                                 |                               |        |                               |                | 0.06                            |        |        |                |                |                |                |
|                         |                |                |                |                                                 |                               |        |                               |                | 1.50                            |        |        |                |                |                |                |
|                         |                |                |                |                                                 |                               |        |                               |                | sty                             |        |        |                |                |                |                |
|                         |                |                |                |                                                 |                               |        |                               |                | -0.49                           |        |        |                |                |                |                |



# Peak 417

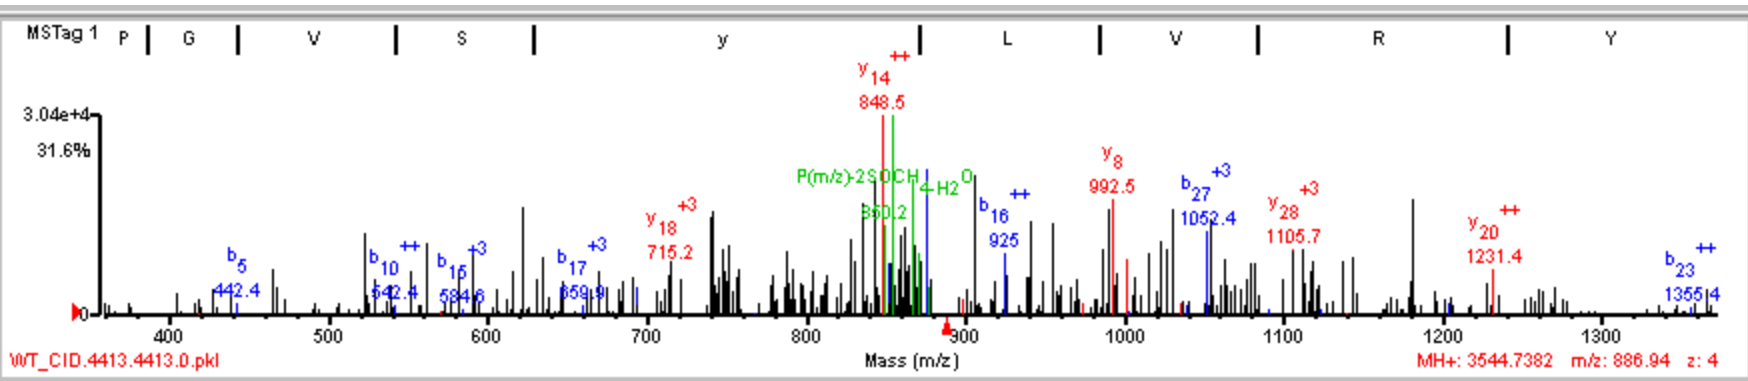

| Rank | Score | SPI (%) | BCS | # Unmatched Ions | Variable sites | Sequence                                                              | MH* Calculated (Da) | MH* Error (Da) | MH* Error (ppm) | Protein MW/pi (Da) | Species      | Accession #              | MS-Digest Index #     | Protein Name                                                                 |
|------|-------|---------|-----|------------------|----------------|-----------------------------------------------------------------------|---------------------|----------------|-----------------|--------------------|--------------|--------------------------|-----------------------|------------------------------------------------------------------------------|
| 1    | 11.45 | 65.0    | 8   | 10/24            | M176m Y162y    | (K) V M G P / G V S y L V R Y M G C V E V L Q S M R A L D F N T R (T) | 3448.70             | 96.0385        | 21.8            | 62849.5/6.10       | Homo sapiens | <a href="#">52693921</a> | <a href="#">18788</a> | SHC (Src homology 2 domain containing) transforming protein 1 isoform p68Shc |
| 1    | 11.45 | 65.0    | 8   | 10/24            | M66m Y52y      | (K) V M G P / G V S y L V R Y M G C V E V L Q S M R A L D F N T R (T) | 3448.70             | 96.0385        | 21.8            | 51681.9/6.71       | Homo sapiens | <a href="#">32261324</a> | <a href="#">26862</a> | SHC (Src homology 2 domain containing) transforming protein 1 isoform p52Shc |

| Fragment-ion (m/z)      | 523.38             | 622.53 | 715.15             | 739.77 | 742.03 | 748.16                          | 828.87 | 835.56 | 842.81         | 848.50             | 850.18 | 854.69             | 862.26 | 866.62                               | 870.91         | 875.66             | 906.03 | 925.02             | 990.94         | 992.46 | 1031.12 | 1054.73            | 1105.70 | 1181.50 |
|-------------------------|--------------------|--------|--------------------|--------|--------|---------------------------------|--------|--------|----------------|--------------------|--------|--------------------|--------|--------------------------------------|----------------|--------------------|--------|--------------------|----------------|--------|---------|--------------------|---------|---------|
| Frac. Inten. (% of TIC) | 4.30               | 4.12   | 3.89               | 5.07   | 5.81   | 4.08                            | 6.36   | 4.17   | 5.02           | 9.58               | 0.20   | 1.15               | 0.21   | 0.15                                 | 0.18           | 6.47               | 6.57   | 4.89               | 3.93           | 5.42   | 3.94    | 4.35               | 4.82    | 4.71    |
| Rel. Inten. (% of BP)   | 44.83              | 43.03  | 40.59              | 59.17  | 60.66  | 42.58                           | 66.32  | 43.49  | 52.42          | 100.00             | 2.09   | 12.02              | 2.23   | 1.57                                 | 1.84           | 67.54              | 68.54  | 51.06              | 41.04          | 56.58  | 41.09   | 45.35              | 50.31   | 49.18   |
| Score                   | 1.00               | -0.11  | 1.00               | -0.15  | -0.15  | 0.50                            | -0.17  | -0.11  | 0.25           | 1.00               | 1.00   | 1.00               | 1.00   | 1.00                                 | 1.00           | -0.17              | 1.00   | -0.10              | 1.00           | -0.10  | -0.10   | 1.00               | -0.13   | -0.12   |
| Ion-type                | y+++ <sub>13</sub> |        | y+++ <sub>12</sub> |        |        | y <sub>5</sub> -NH <sub>3</sub> |        |        | a <sub>5</sub> | y+++ <sub>14</sub> | m      | y+++ <sub>21</sub> | sty    | b+++ <sub>15</sub> -H <sub>2</sub> O | b <sub>2</sub> | b+++ <sub>15</sub> |        | b+++ <sub>16</sub> | y <sub>8</sub> |        |         | y+++ <sub>26</sub> |         |         |
| Delta Da                | 0.44               |        | 0.14               |        |        | -0.20                           |        |        | -0.54          | 0.07               |        | 0.27               | -0.17  | -0.25                                | -0.43          | -0.22              |        | -0.39              |                | -0.07  |         | 0.57               |         |         |

# Peak 418

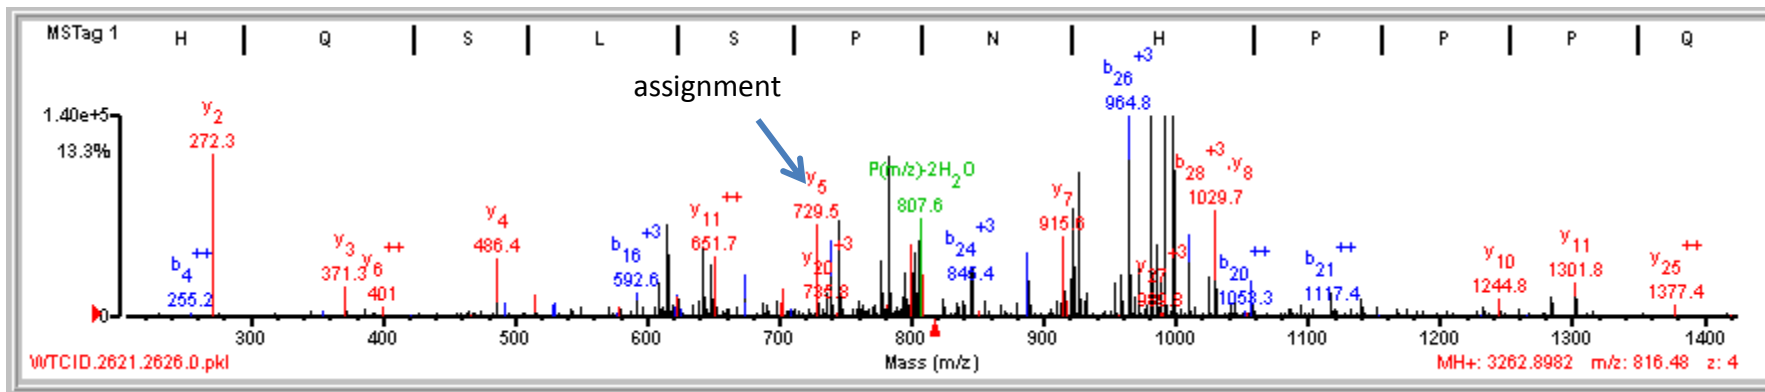

| Rank                    | Score          | SPI (%) | BCS    | # Unmatched Ions   | Variable sites                       | Sequence                                                                         | MH* Calculated (Da) | MH* Error (Da) | MH* Error (ppm)                 | Protein MW/pi (Da) | Species        | Accession # | MS-Digest Index #  | Protein Name                                                                |                |        |                    |                    |                                      |                    |        |        |                    |                    |                |
|-------------------------|----------------|---------|--------|--------------------|--------------------------------------|----------------------------------------------------------------------------------|---------------------|----------------|---------------------------------|--------------------|----------------|-------------|--------------------|-----------------------------------------------------------------------------|----------------|--------|--------------------|--------------------|--------------------------------------|--------------------|--------|--------|--------------------|--------------------|----------------|
| 1                       | 17.31          | 84.1    | 12     | 6/25               | Y317y                                | (R)R R H Q S L S P N H R P P Q L V G Q S V G V S Q I N I D A I y I D V I P R (G) | 3181.55             | 81.3460        | 422.8                           | 92861.3/6.23       | Homo sapiens   | 5453680     | 8768               | neural precursor cell expressed, developmentally down-regulated 9 isoform 1 |                |        |                    |                    |                                      |                    |        |        |                    |                    |                |
| Fragment-ion (m/z)      | 272.26         | 615.82  | 642.86 | 673.56             | 729.48                               | 739.27                                                                           | 745.66              | 777.72         | 783.51                          | 796.11             | 800.55         | 803.42      | 845.92             | 888.09                                                                      | 915.62         | 923.04 | 926.84             | 964.84             | 972.33                               | 981.77             | 986.71 | 992.29 | 997.95             | 1009.82            | 1029.69        |
| Frac. Inten. (% of TIC) | 2.69           | 2.56    | 1.51   | 1.38               | 1.88                                 | 2.28                                                                             | 2.04                | 1.30           | 3.26                            | 1.70               | 1.93           | 2.38        | 1.75               | 2.38                                                                        | 2.23           | 2.94   | 3.59               | 6.80               | 1.53                                 | 5.28               | 1.49   | 5.04   | 36.44              | 2.56               | 3.29           |
| Rel. Inten. (% of BP)   | 7.38           | 7.03    | 4.13   | 3.78               | 5.16                                 | 6.20                                                                             | 5.59                | 3.58           | 8.95                            | 4.68               | 5.28           | 6.52        | 4.80               | 6.54                                                                        | 6.11           | 8.08   | 9.85               | 18.11              | 4.20                                 | 14.48              | 4.09   | 13.83  | 100.00             | 7.03               | 9.04           |
| Score                   | 1.00           | -0.07   | -0.04  | 1.00               | 1.00                                 | 1.00                                                                             | 1.00                | 0.25           | 1.00                            | 1.00               | 1.00           | -0.07       | 1.00               | 1.00                                                                        | 1.00           | -0.08  | 1.00               | 1.00               | 0.50                                 | 1.00               | -0.04  | -0.14  | 1.00               | 1.00               | 1.00           |
| Ion-type                | y <sub>2</sub> |         |        | b+++ <sub>19</sub> | b+++ <sub>13</sub> -H <sub>2</sub> O | b+++ <sub>13</sub>                                                               | b+++ <sub>21</sub>  | a <sub>7</sub> | b+++ <sub>22</sub>              | b+++ <sub>14</sub> | y <sub>6</sub> |             | b+++ <sub>24</sub> | b+++ <sub>16</sub>                                                          | y <sub>7</sub> |        | b+++ <sub>25</sub> | b+++ <sub>26</sub> | b+++ <sub>18</sub> -H <sub>2</sub> O | b+++ <sub>13</sub> |        |        | b+++ <sub>27</sub> | b+++ <sub>19</sub> | a <sub>9</sub> |
| Delta Da                | 0.09           |         |        | 0.21               | -0.39                                | 0.39                                                                             | 0.61                | -0.71          | 0.45                            | 0.69               | 0.22           |             | 0.84               | 0.13                                                                        | 0.26           |        | 0.75               | 0.41               | 0.33                                 | 0.76               |        |        | 0.49               | 0.30               | 0.16           |
|                         |                |         |        |                    | y <sub>5</sub>                       |                                                                                  |                     |                | y <sub>5</sub> -NH <sub>3</sub> |                    |                |             |                    |                                                                             |                |        |                    |                    |                                      |                    |        |        |                    | y <sub>5</sub>     | 0.29           |

# Peak 419

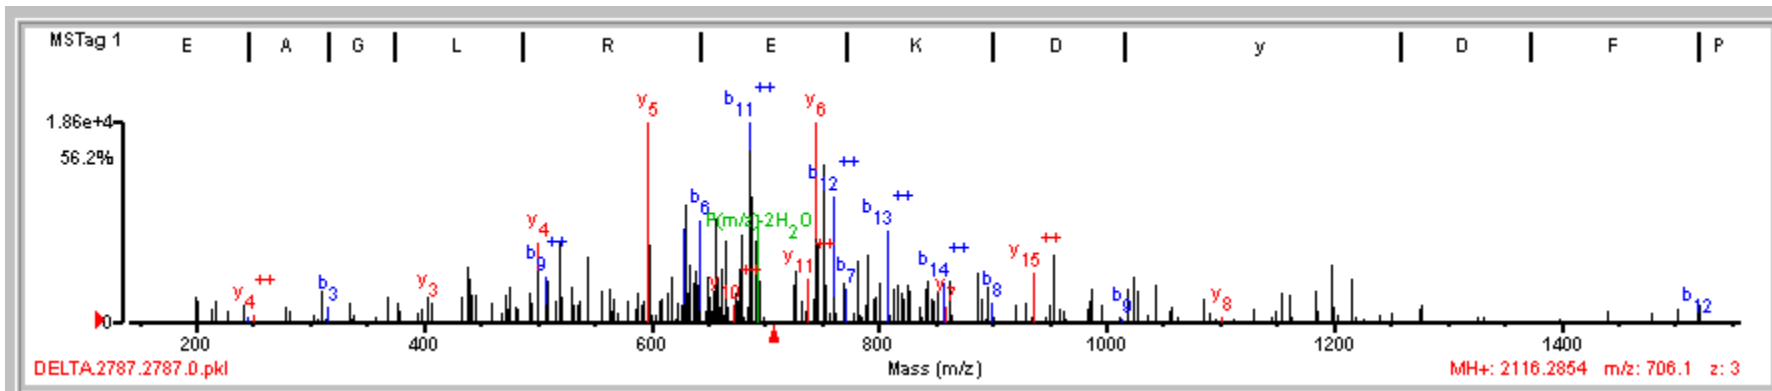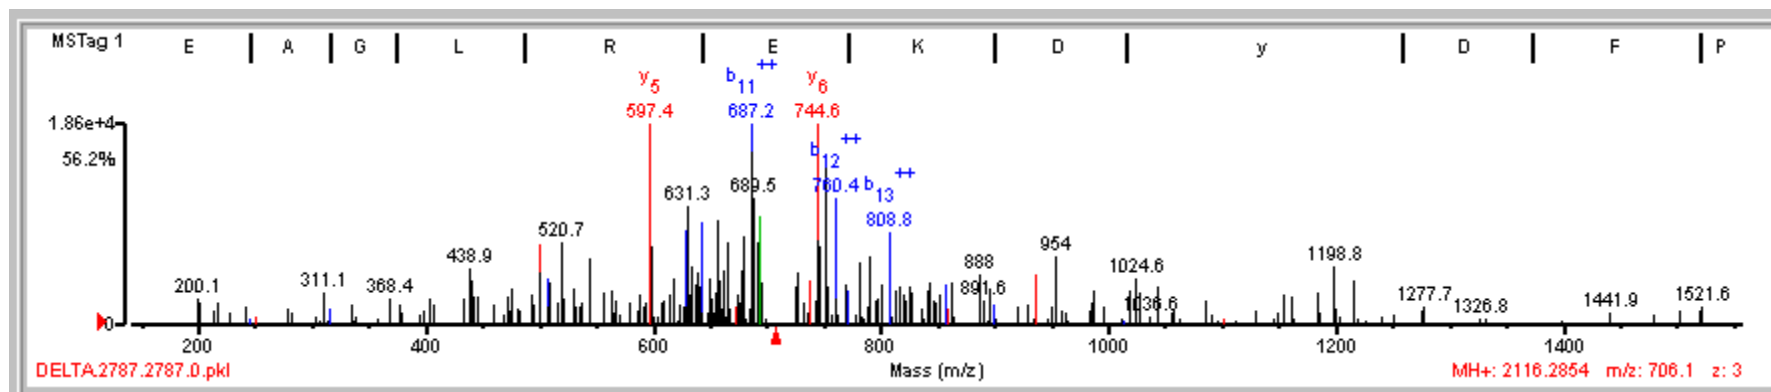

| Rank | Score | SPI (%) | BCS | # Unmatched Ions | Variable sites | Sequence                   | MH* Calculated (Da) | MH* Error (Da) | MH* Error (ppm) | Protein MW/pi (Da) | Species      | Accession #             | MS-Digest Index #    | Protein Name                                                                |
|------|-------|---------|-----|------------------|----------------|----------------------------|---------------------|----------------|-----------------|--------------------|--------------|-------------------------|----------------------|-----------------------------------------------------------------------------|
| 1    | 8.79  | 78.5    | 6   | 5/16             | Y241y          | (R)DEAGLR\EKD\y\DFIPPMR(Q) | 2035.95             | 80.3312        | 172.4           | 92861.3/6.23       | Homo sapiens | <a href="#">5453680</a> | <a href="#">8768</a> | neural precursor cell expressed, developmentally down-regulated 9 isoform 1 |

| Fragment-ion (m/z)     | 500.32         | 508.17                       | 520.71 | 597.37         | 629.08                        | 631.30 | 642.44         | 657.33 | 677.73                                          | 687.16                        | 689.50 | 691.51 | 744.60         | 751.29                                          | 760.35                        | 808.75                        |
|------------------------|----------------|------------------------------|--------|----------------|-------------------------------|--------|----------------|--------|-------------------------------------------------|-------------------------------|--------|--------|----------------|-------------------------------------------------|-------------------------------|-------------------------------|
| Frac. Inten.(% of TIC) | 4.52           | 3.68                         | 3.65   | 14.04          | 3.80                          | 4.01   | 3.89           | 4.99   | 3.74                                            | 17.76                         | 4.26   | 4.61   | 11.24          | 6.78                                            | 5.62                          | 3.43                          |
| Rel. Inten.(% of BP)   | 25.47          | 20.71                        | 20.55  | 79.09          | 21.41                         | 22.55  | 21.90          | 28.11  | 21.04                                           | 100.00                        | 23.98  | 25.93  | 63.28          | 38.16                                           | 31.63                         | 19.31                         |
| Score                  | 1.00           | 1.00                         | -0.21  | 1.00           | 1.00                          | -0.23  | 1.00           | -0.28  | 0.50                                            | 1.00                          | -0.24  | -0.26  | 1.00           | 0.50                                            | 1.00                          | 1.00                          |
| Ion-type               | y <sub>4</sub> | b <sup>++</sup> <sub>9</sub> |        | y <sub>5</sub> | b <sup>++</sup> <sub>10</sub> |        | b <sub>e</sub> |        | b <sup>++</sup> <sub>11</sub> -H <sub>2</sub> O | b <sup>++</sup> <sub>11</sub> |        |        | y <sub>6</sub> | b <sup>++</sup> <sub>12</sub> -H <sub>2</sub> O | b <sup>++</sup> <sub>12</sub> | b <sup>++</sup> <sub>13</sub> |
| Delta Da               | 0.06           | 0.42                         |        | 0.05           | -0.18                         |        | 0.12           |        | -0.04                                           | 0.39                          |        |        | 0.21           | -0.01                                           | 0.04                          | -0.09                         |

# Peak 420

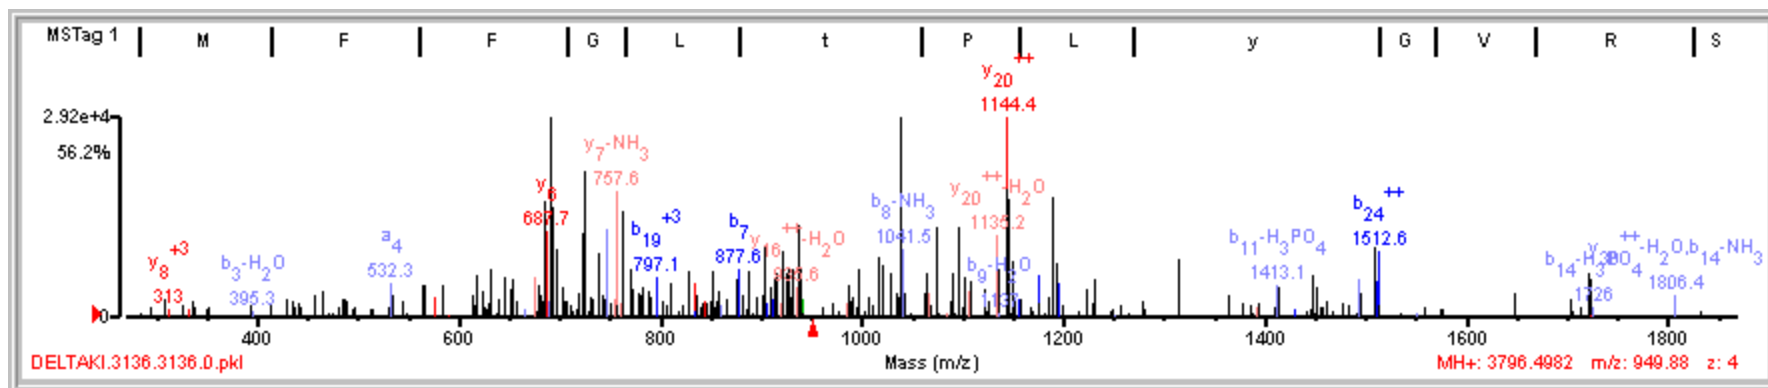

| Rank                    | Score          | SPI (%)                          | BCS    | # Unmatched Ions | Variable sites                  | Sequence                                                                | MH* Calculated (Da) | MH* Error (Da) | MH* Error (ppm) | Protein MW/pI (Da) | Species        | Accession #                     | MS-Digest Index # | Protein Name                                                               |                |                 |                 |                 |         |                 |         |                 |         |
|-------------------------|----------------|----------------------------------|--------|------------------|---------------------------------|-------------------------------------------------------------------------|---------------------|----------------|-----------------|--------------------|----------------|---------------------------------|-------------------|----------------------------------------------------------------------------|----------------|-----------------|-----------------|-----------------|---------|-----------------|---------|-----------------|---------|
| 1                       | 11.52          | 76.1                             | 10     | 8/23             | T2632t T2652t Y2635y S2625s     | (R) = M F T F G L t P L y G V R S Y G V E D I P F Y S I S S t G K K (R) | 3477.67             | 318.8310       | -272.4          | 431766.7/8.22      | Homo sapiens   | 56550039                        | 35828             | myeloid/lymphoid or mixed-lineage leukemia (trithorax homolog, Drosophila) |                |                 |                 |                 |         |                 |         |                 |         |
| Fragment-ion (m/z)      | 686.71         | 692.63                           | 697.42 | 724.31           | 746.84                          | 757.59                                                                  | 763.68              | 904.05         | 914.54          | 936.92             | 1038.31        | 1041.46                         | 1065.25           | 1074.02                                                                    | 1096.28        | 1135.17         | 1144.38         | 1189.69         | 1194.38 | 1447.73         | 1510.33 | 1512.58         | 1721.86 |
| Frac. Inten. (% of TIC) | 5.29           | 12.35                            | 3.37   | 5.60             | 2.10                            | 3.35                                                                    | 2.54                | 2.08           | 2.34            | 4.71               | 16.20          | 2.25                            | 2.28              | 2.17                                                                       | 2.74           | 3.43            | 12.43           | 3.44            | 2.14    | 1.97            | 3.37    | 1.89            | 1.97    |
| Rel. Inten. (% of BP)   | 32.67          | 76.23                            | 20.81  | 34.55            | 12.97                           | 20.65                                                                   | 15.64               | 12.70          | 14.44           | 29.09              | 100.00         | 13.88                           | 14.06             | 13.38                                                                      | 16.94          | 21.15           | 78.70           | 21.25           | 13.23   | 12.14           | 20.80   | 11.67           | 12.16   |
| Score                   | 1.00           | 1.00                             | -0.21  | -0.35            | 0.50                            | 0.50                                                                    | 1.00                | -0.13          | 1.00            | 1.00               | 0.50           | 1.00                            | 0.50              | 1.00                                                                       | 0.50           | 1.00            | 0.50            | 1.00            | -0.21   | -0.12           | -0.21   | 1.00            | -0.12   |
| Ion-type                | y <sub>8</sub> | b <sub>3</sub> +H <sub>2</sub> O |        |                  | b <sub>2</sub> -NH <sub>3</sub> | y <sub>7</sub> -NH <sub>3</sub>                                         | b <sub>8</sub>      |                | y <sub>16</sub> | y <sub>16</sub>    | b <sub>7</sub> | b <sub>8</sub> -NH <sub>3</sub> | b <sub>9</sub>    | b <sub>9</sub>                                                             | b <sub>9</sub> | y <sub>20</sub> | y <sub>20</sub> | y <sub>20</sub> |         | b <sub>11</sub> |         | b <sub>24</sub> |         |
| Delta Da                | -0.80          | 0.69                             |        |                  | -0.38                           | 0.28                                                                    |                     |                | 0.47            | -0.48              | 0.58           | 0.14                            | -0.68             |                                                                            | 0.51           | 0.18            | 0.38            |                 | -0.58   |                 |         | -0.02           |         |

# Peak 422

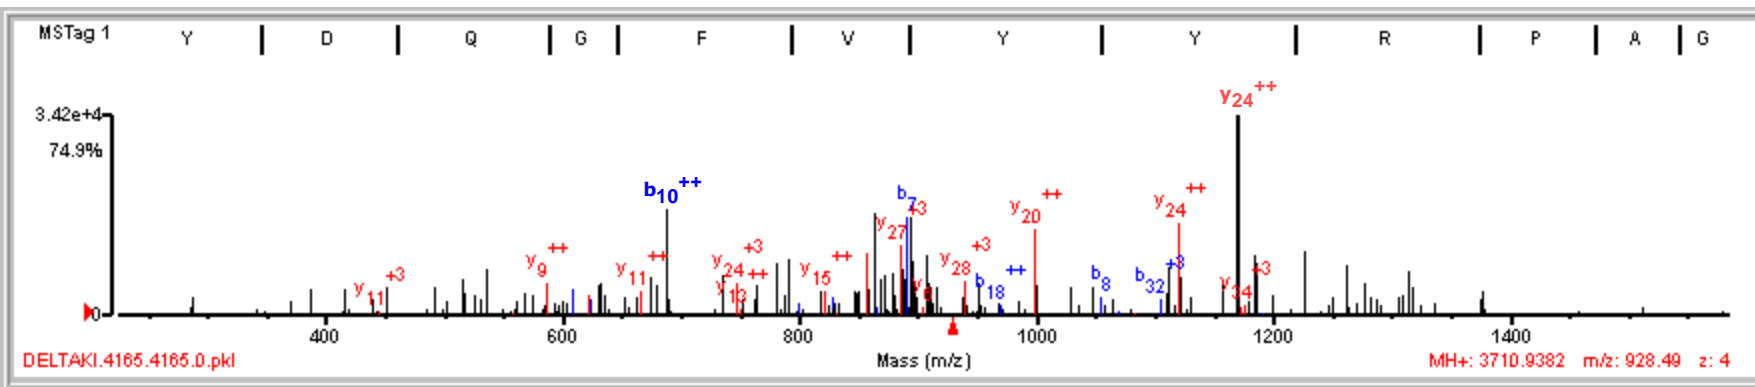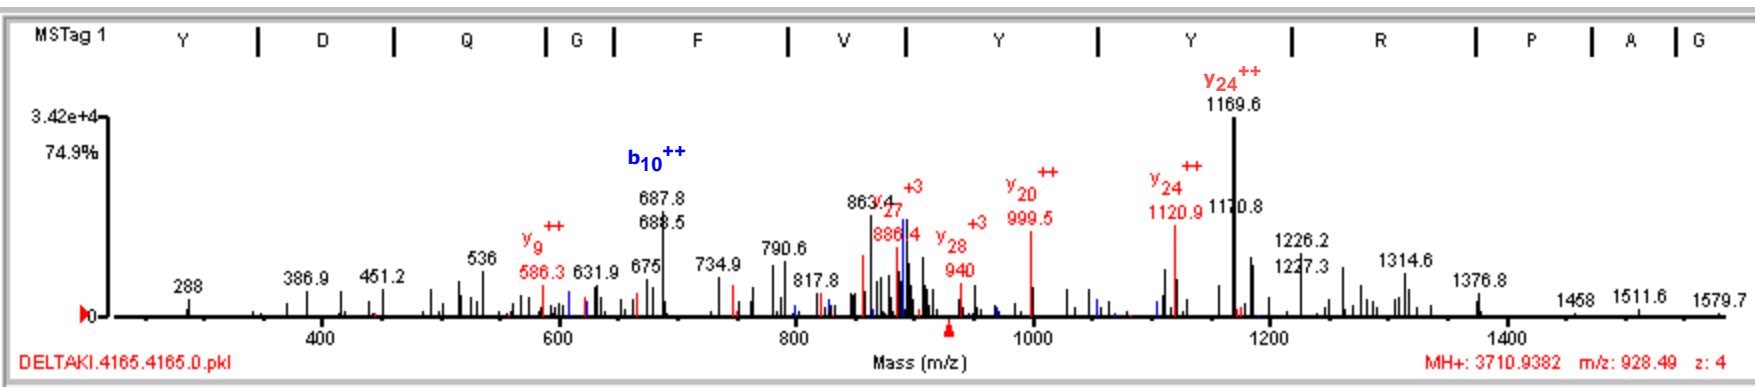

| Rank | Score | SPI (%) | BCS | # Unmatched Ions | Variable sites | Sequence                                                                              | MH <sup>+</sup> Calculated (Da) | MH <sup>+</sup> Error (Da) | MH <sup>+</sup> Error (ppm) | Protein MW/pl (Da) | Species      | Accession #              | MS-Digest Index #     | Protein Name                       |
|------|-------|---------|-----|------------------|----------------|---------------------------------------------------------------------------------------|---------------------------------|----------------------------|-----------------------------|--------------------|--------------|--------------------------|-----------------------|------------------------------------|
| 1    | 10.74 | 92.3    | 8   | 2/15             | T19t Y228y     | (R) t Y D Q G F V Y R I P A G G G I V G A / G I A A A V A S A / G V I Y P Y Q P R (A) | 3549.75                         | 161.1832                   | 337.0                       | 63110.17.25        | Homo sapiens | <a href="#">67782346</a> | <a href="#">18792</a> | lysyl oxidase-like 1 preproprotein |

| Fragment-ion (m/z)      | 687.85                         | 780.16                         | 847.51                                           | 857.35                         | 863.40         | 878.77                          | 886.44         | 888.12 | 891.09                         | 894.83                         | 906.93                          | 999.49                         | 1120.87                        | 1169.56                        | 1226.16                          |
|-------------------------|--------------------------------|--------------------------------|--------------------------------------------------|--------------------------------|----------------|---------------------------------|----------------|--------|--------------------------------|--------------------------------|---------------------------------|--------------------------------|--------------------------------|--------------------------------|----------------------------------|
| Frac. Inten. (% of TIC) | 10.75                          | 4.86                           | 3.58                                             | 5.15                           | 5.56           | 3.60                            | 4.41           | 4.09   | 5.27                           | 0.29                           | 4.79                            | 5.92                           | 6.78                           | 29.84                          | 5.11                             |
| Rel. Inten. (% of BP)   | 36.02                          | 16.28                          | 12.01                                            | 17.25                          | 18.63          | 12.07                           | 14.77          | 13.69  | 17.64                          | 0.98                           | 16.05                           | 19.85                          | 22.71                          | 100.00                         | 17.12                            |
| Score                   | 1.00                           | 1.00                           | 1.00                                             | 1.00                           | 0.25           | -0.12                           | 1.00           | -0.14  | 1.00                           | 0.25                           | 1.00                            | 1.00                           | 1.00                           | 1.00                           | 0.50                             |
| Ion-type                | b <sup>+++</sup> <sub>10</sub> | y <sup>+++</sup> <sub>25</sub> | b <sup>+++</sup> <sub>15</sub> -H <sub>2</sub> O | b <sup>+++</sup> <sub>15</sub> | a <sub>7</sub> | y <sup>+++</sup> <sub>17</sub>  | b <sub>7</sub> | st     | b <sup>+++</sup> <sub>16</sub> | b <sup>+++</sup> <sub>19</sub> | y <sup>+++</sup> <sub>24</sub>  | y <sup>+++</sup> <sub>25</sub> | y <sup>+++</sup> <sub>25</sub> | y <sup>+++</sup> <sub>25</sub> | y <sub>10</sub> -NH <sub>3</sub> |
| Delta Da                | 0.57                           | 0.44                           | -0.34                                            | 0.49                           | 0.07           | 0.51                            |                | -0.24  | 0.15                           | 0.54                           | 0.56                            | 0.32                           | 0.49                           | -0.40                          |                                  |
|                         |                                |                                | b <sup>+++</sup> <sub>26</sub>                   | y <sup>+++</sup> <sub>16</sub> |                | y <sup>+++</sup> <sub>27</sub>  |                |        |                                |                                | y <sup>+++</sup> <sub>20</sub>  |                                |                                |                                |                                  |
|                         |                                |                                | 0.79                                             | -0.07                          |                | 0.33                            |                |        |                                |                                | -0.01                           |                                |                                |                                |                                  |
|                         |                                |                                |                                                  |                                |                | y <sub>6</sub> -NH <sub>3</sub> |                |        |                                |                                | y <sub>7</sub> -NH <sub>3</sub> |                                |                                |                                |                                  |
|                         |                                |                                |                                                  |                                |                | 0.09                            |                |        |                                |                                | 0.06                            |                                |                                |                                |                                  |





# Peak 424

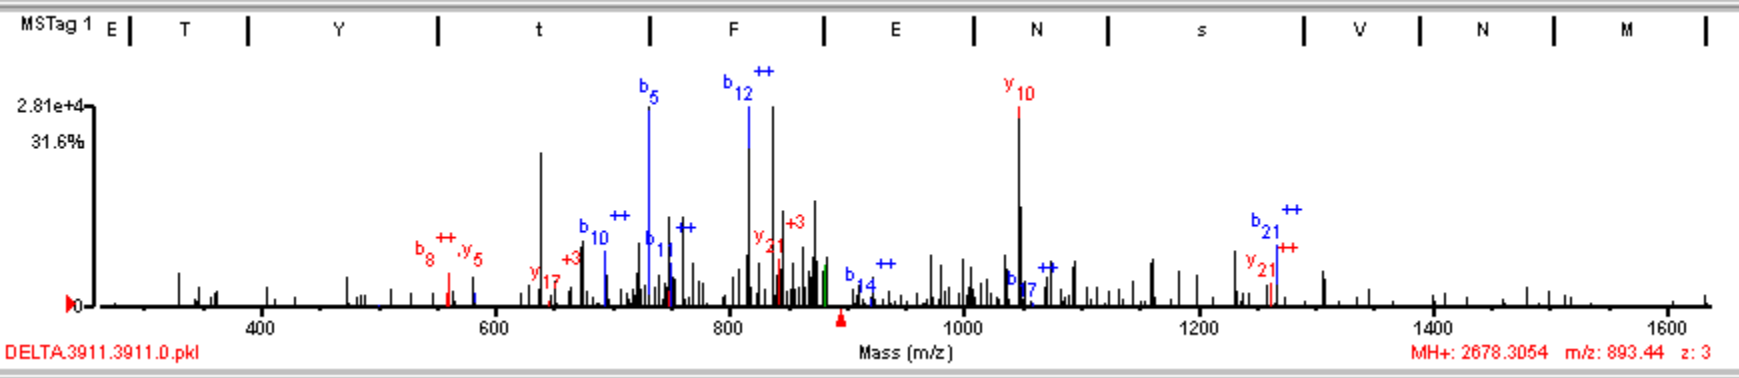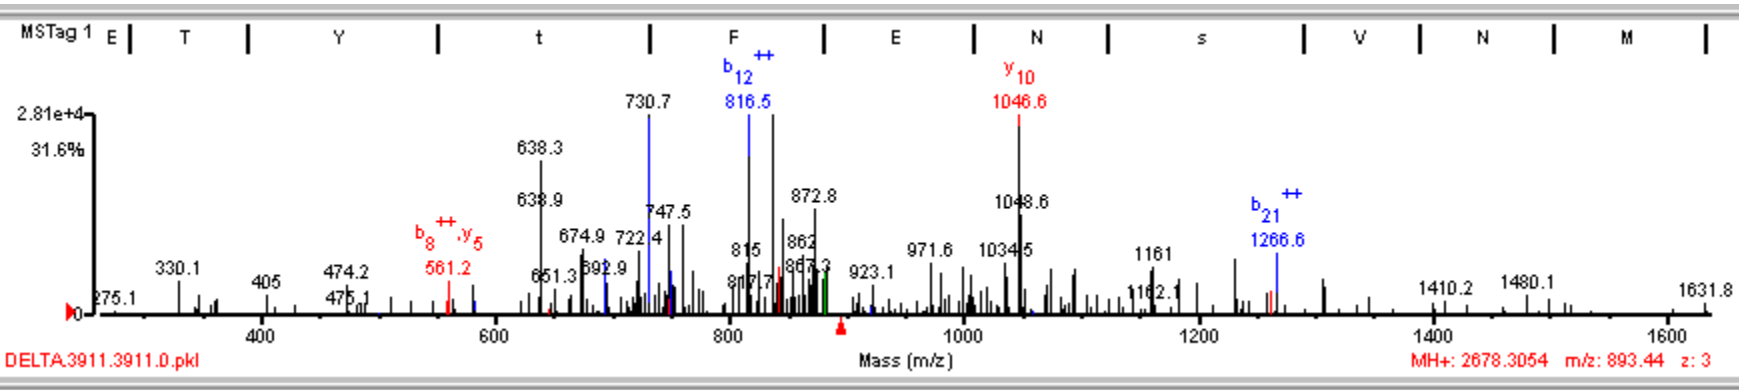

| Rank | Score | SPI (%) | BCS | # Unmatched Ions | Variable sites | Sequence                                                   | MH <sup>+</sup> Calculated (Da) | MH <sup>+</sup> Error (Da) | MH <sup>+</sup> Error (ppm) | Protein MW/pl (Da) | Species      | Accession #              | MS-Digest Index #     | Protein Name           |
|------|-------|---------|-----|------------------|----------------|------------------------------------------------------------|---------------------------------|----------------------------|-----------------------------|--------------------|--------------|--------------------------|-----------------------|------------------------|
| 1    | 10.23 | 76.7    | 8   | 8/21             | Y184y S189s    | (K)R E T Y T F E N s V \ N M I L P / S S T E V S V \ K (T) | 2518.21                         | 160.0925                   | 59.7                        | 106834.4/9.43      | Homo sapiens | <a href="#">68508961</a> | <a href="#">31424</a> | centromere protein C 1 |

  

| Fragment-ion (m/z)      | 638.33 | 673.98 | 694.24                        | 721.66 | 730.72         | 747.51 | 750.82                        | 760.29 | 807.39                                          | 816.53                        | 836.57         | 840.70 | 845.44                         | 861.98                          | 872.83                        | 971.61 | 1006.89        | 1046.64         | 1159.74                           | 1230.91 | 1266.61                       |
|-------------------------|--------|--------|-------------------------------|--------|----------------|--------|-------------------------------|--------|-------------------------------------------------|-------------------------------|----------------|--------|--------------------------------|---------------------------------|-------------------------------|--------|----------------|-----------------|-----------------------------------|---------|-------------------------------|
| Frac. Inten. (% of TIC) | 5.82   | 2.82   | 1.92                          | 2.10   | 11.56          | 3.33   | 2.20                          | 3.96   | 1.76                                            | 11.17                         | 18.31          | 1.80   | 2.03                           | 1.73                            | 4.66                          | 1.58   | 1.52           | 15.30           | 2.46                              | 1.88    | 2.10                          |
| Rel. Inten. (% of BP)   | 31.77  | 15.40  | 10.48                         | 11.46  | 63.16          | 18.16  | 11.99                         | 21.63  | 9.64                                            | 61.01                         | 100.00         | 9.84   | 11.10                          | 9.44                            | 25.47                         | 8.63   | 8.29           | 83.55           | 13.45                             | 10.27   | 11.47                         |
| Score                   | -0.32  | -0.15  | 1.00                          | -0.11  | 1.00           | -0.18  | 1.00                          | -0.22  | 0.50                                            | 1.00                          | 1.00           | -0.10  | 1.00                           | 0.50                            | 1.00                          | -0.09  | 1.00           | 1.00            | 0.50                              | -0.10   | 1.00                          |
| Ion-type                |        |        | b <sup>++</sup> <sub>10</sub> |        | b <sub>5</sub> |        | b <sup>++</sup> <sub>11</sub> |        | b <sup>++</sup> <sub>12</sub> -H <sub>2</sub> O | b <sup>++</sup> <sub>12</sub> | y <sub>8</sub> |        | b <sup>+++</sup> <sub>21</sub> | b <sub>6</sub> -NH <sub>3</sub> | b <sup>++</sup> <sub>13</sub> |        | b <sub>7</sub> | y <sub>10</sub> | y <sub>11</sub> -H <sub>2</sub> O |         | b <sup>++</sup> <sub>21</sub> |
| Delta Da                |        |        | -0.01                         |        | -0.56          |        | -0.45                         |        | -0.40                                           | -0.26                         | 0.13           |        | 0.76                           | 0.66                            | -0.51                         |        | -0.50          | 0.07            | 0.14                              |         | 0.09                          |







# Peak 428

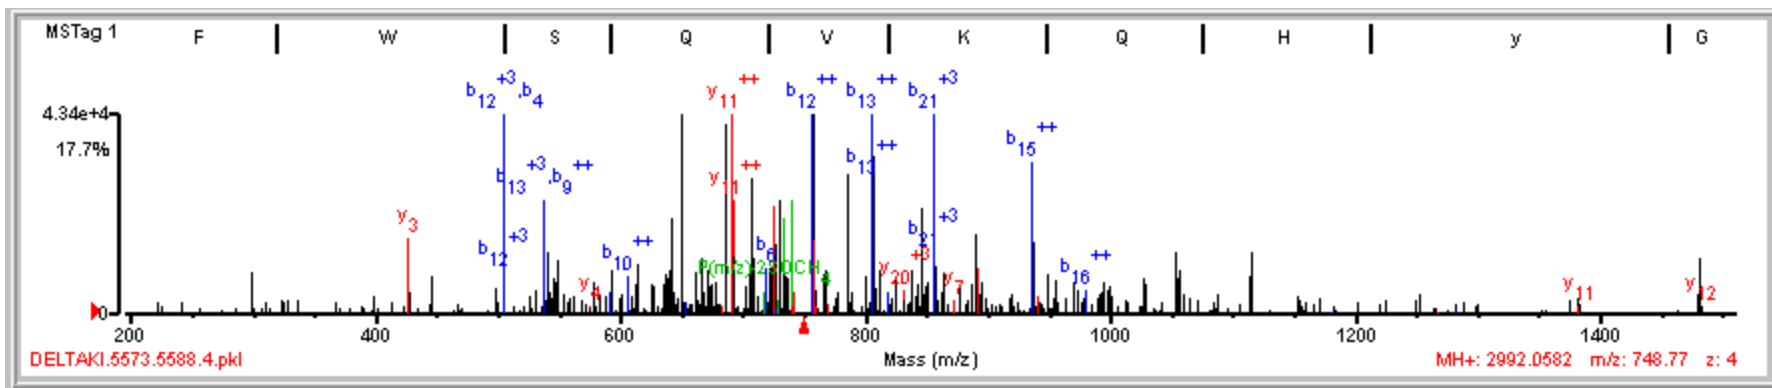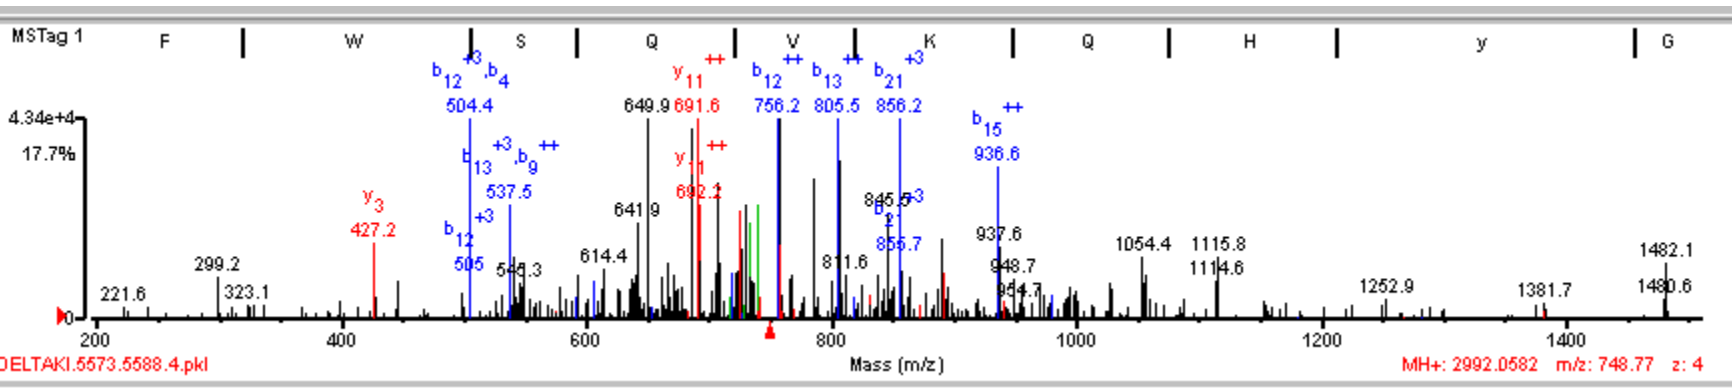

| Rank                    | Score          | SPI (%)        | BCS                         | # Unmatched Ions | # Variable sites  | Sequence                                                    | MH <sup>+</sup> Calculated (Da) | MH <sup>+</sup> Error (Da)    | MH <sup>+</sup> Error (ppm)   | Protein MW/pI (Da) | Species      | Accession #             | MS-Digest Index #     | Protein Name                         |        |                               |        |                                  |                                |                               |                               |         |         |
|-------------------------|----------------|----------------|-----------------------------|------------------|-------------------|-------------------------------------------------------------|---------------------------------|-------------------------------|-------------------------------|--------------------|--------------|-------------------------|-----------------------|--------------------------------------|--------|-------------------------------|--------|----------------------------------|--------------------------------|-------------------------------|-------------------------------|---------|---------|
| 1                       | 11.60          | 72.4           | 8                           | 11/23            | M160m T168t Y156y | (R) L G F W S Q V K Q H / Y G V D m S C L E G F I A t R (C) | 2816.33                         | 175.7299                      | -66.1                         | 35238.5/5.58       | Homo sapiens | <a href="#">8922515</a> | <a href="#">16693</a> | protein arginine methyltransferase 6 |        |                               |        |                                  |                                |                               |                               |         |         |
| Fragment-ion (m/z)      | 427.15         | 504.36         | 537.50                      | 545.30           | 641.87            | 649.88                                                      | 685.91                          | 691.55                        | 707.82                        | 725.24             | 730.06       | 732.92                  | 735.96                | 756.15                               | 785.95 | 805.53                        | 845.54 | 855.25                           | 856.23                         | 890.66                        | 936.57                        | 1054.44 | 1114.62 |
| Frac. Inten. (% of TIC) | 1.33           | 5.00           | 1.81                        | 1.36             | 2.55              | 6.35                                                        | 3.03                            | 10.06                         | 3.38                          | 3.07               | 1.94         | 0.06                    | 1.38                  | 30.54                                | 2.46   | 8.39                          | 1.51   | 2.24                             | 4.34                           | 2.01                          | 3.27                          | 2.28    | 1.61    |
| Rel. Inten. (% of BP)   | 4.37           | 16.38          | 5.93                        | 4.46             | 8.35              | 20.80                                                       | 9.93                            | 32.94                         | 11.06                         | 10.06              | 6.37         | 0.19                    | 4.53                  | 100.00                               | 8.05   | 27.46                         | 4.94   | 7.33                             | 14.22                          | 6.59                          | 10.72                         | 7.47    | 5.27    |
| Score                   | 1.00           | 1.00           | 1.00                        | -0.04            | -0.08             | -0.21                                                       | -0.10                           | 1.00                          | 1.00                          | 1.00               | -0.06        | 2.00                    | -0.05                 | 1.00                                 | -0.08  | 1.00                          | -0.05  | 0.50                             | 1.00                           | 1.00                          | 1.00                          | -0.07   | -0.05   |
| Ion-type                | y <sub>3</sub> | b <sub>4</sub> | b <sup>+</sup> <sub>9</sub> |                  |                   |                                                             |                                 | a <sub>9</sub>                | b <sup>++</sup> <sub>17</sub> |                    |              | m                       |                       | b <sup>++</sup> <sub>12</sub>        |        | b <sup>++</sup> <sub>13</sub> |        | y <sub>7</sub> -H <sub>2</sub> O | b <sup>+++</sup> <sub>21</sub> | y <sup>++</sup> <sub>14</sub> | b <sup>++</sup> <sub>15</sub> |         |         |
| Delta Da                | -0.02          | 0.10           | -0.29                       |                  |                   |                                                             |                                 | 0.19                          | 0.52                          |                    |              | 0.10                    |                       | -0.20                                |        | -0.35                         |        | -0.13                            | 0.19                           | -0.66                         | -0.34                         |         |         |
|                         |                |                |                             |                  |                   |                                                             |                                 | y <sup>++</sup> <sub>11</sub> | -0.21                         |                    |              |                         |                       |                                      |        |                               |        | -0.13                            |                                |                               |                               |         |         |









# Peak 432

Ions that verify assignment

assignment

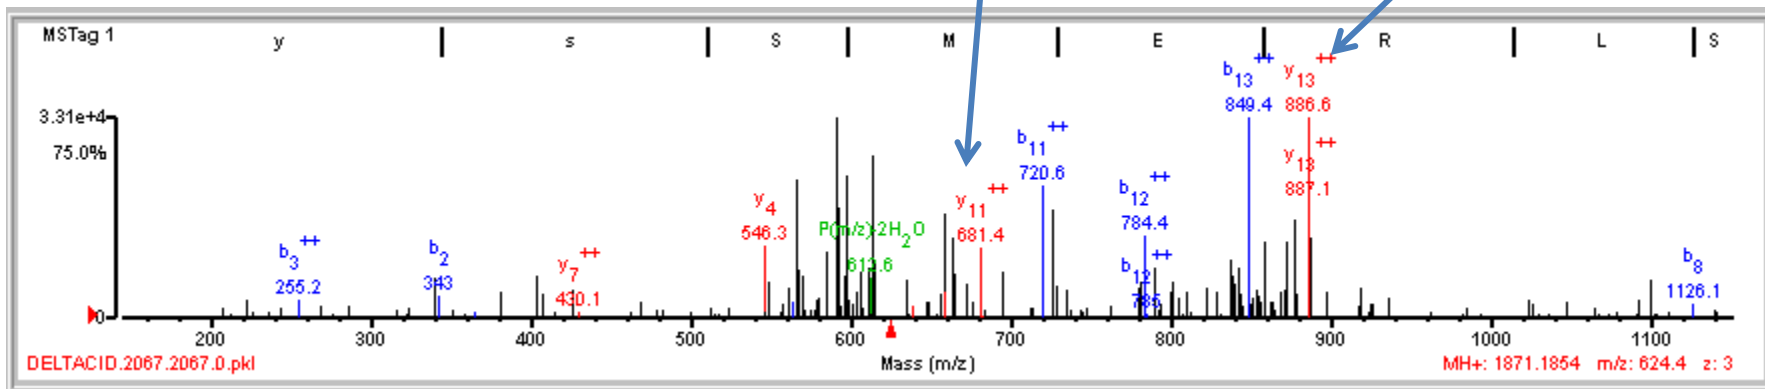

| Rank                    | Score          | SPI (%) | BCS    | # Unmatched Ions | Variable sites                 | Sequence                                | MH <sup>+</sup> Calculated (Da) | MH <sup>+</sup> Error (Da) | MH <sup>+</sup> Error (ppm) | Protein MW/pI (Da)            | Species                       | Accession #                   | MS-Digest Index #     | Protein Name                                     |        |        |        |                               |        |        |        |                                                  |                               |
|-------------------------|----------------|---------|--------|------------------|--------------------------------|-----------------------------------------|---------------------------------|----------------------------|-----------------------------|-------------------------------|-------------------------------|-------------------------------|-----------------------|--------------------------------------------------|--------|--------|--------|-------------------------------|--------|--------|--------|--------------------------------------------------|-------------------------------|
| 1                       | 10.47          | 60.2    | 8      | 10/23            | Y853y S854s                    | (K) V/Y S/S\M E R L S   L   L \E \R (R) | 1711.87                         | 159.3171                   | -329.0                      | 196436.8/8.41                 | Homo sapiens                  | <a href="#">112363080</a>     | <a href="#">31953</a> | microtubule associated serine/threonine kinase 2 |        |        |        |                               |        |        |        |                                                  |                               |
| Fragment-ion (m/z)      | 546.30         | 566.91  | 585.73 | 591.72           | 597.66                         | 606.63                                  | 614.40                          | 658.61                     | 664.31                      | 681.41                        | 720.62                        | 726.69                        | 780.48                | 784.40                                           | 800.15 | 837.45 | 843.33 | 849.39                        | 854.02 | 858.55 | 872.46 | 877.58                                           | 886.62                        |
| Frac. Inten. (% of TIC) | 2.84           | 6.64    | 0.07   | 0.41             | 5.73                           | 2.09                                    | 8.02                            | 4.68                       | 4.46                        | 2.67                          | 4.71                          | 3.83                          | 2.39                  | 3.13                                             | 2.35   | 5.86   | 2.69   | 8.40                          | 2.50   | 2.71   | 2.82   | 6.70                                             | 14.31                         |
| Rel. Inten. (% of BP)   | 19.87          | 46.41   | 0.49   | 2.88             | 40.05                          | 14.61                                   | 56.04                           | 32.69                      | 31.17                       | 18.63                         | 32.92                         | 26.78                         | 16.69                 | 21.85                                            | 16.42  | 40.96  | 18.83  | 58.67                         | 17.45  | 18.93  | 19.70  | 46.80                                            | 100.00                        |
| Score                   | 1.00           | -0.46   | 0.25   | 1.50             | 1.00                           | 1.00                                    | -0.56                           | 1.00                       | 1.00                        | 1.00                          | 1.00                          | -0.27                         | -0.17                 | 1.00                                             | -0.16  | -0.41  | -0.19  | 1.00                          | -0.17  | -0.19  | -0.20  | 0.50                                             | 1.00                          |
| Ion-type                | y <sub>4</sub> |         |        | st               | y <sup>+++</sup> <sub>13</sub> | b <sub>4</sub>                          | b <sup>+++</sup> <sub>9</sub>   |                            | y <sub>5</sub>              | b <sup>++</sup> <sub>10</sub> | y <sup>++</sup> <sub>11</sub> | b <sup>++</sup> <sub>11</sub> |                       | b <sup>++</sup> <sub>12</sub>                    |        |        |        | b <sup>++</sup> <sub>13</sub> |        |        |        | y <sup>+++</sup> <sub>13</sub> -H <sub>2</sub> O | y <sup>++</sup> <sub>13</sub> |
| Delta Da                | 0.01           |         |        | -0.21            | 0.14                           | 0.52                                    | -0.59                           | -0.76                      | 0.55                        | -0.45                         | 0.31                          |                               |                       | -0.43                                            |        |        |        | 0.04                          |        |        |        | -0.28                                            | -0.25                         |

# Peak 433

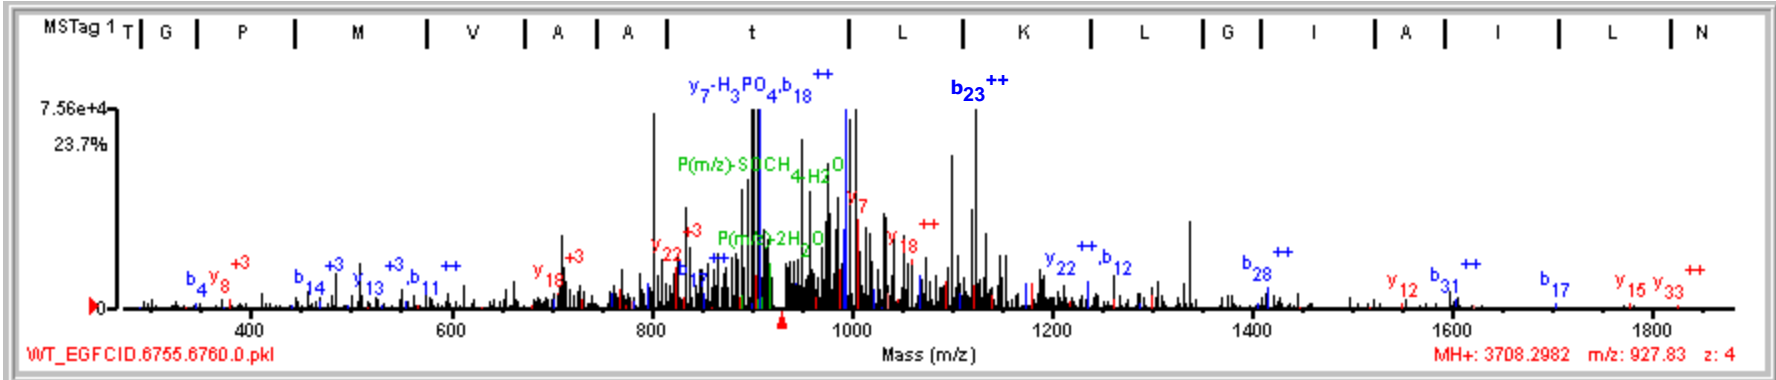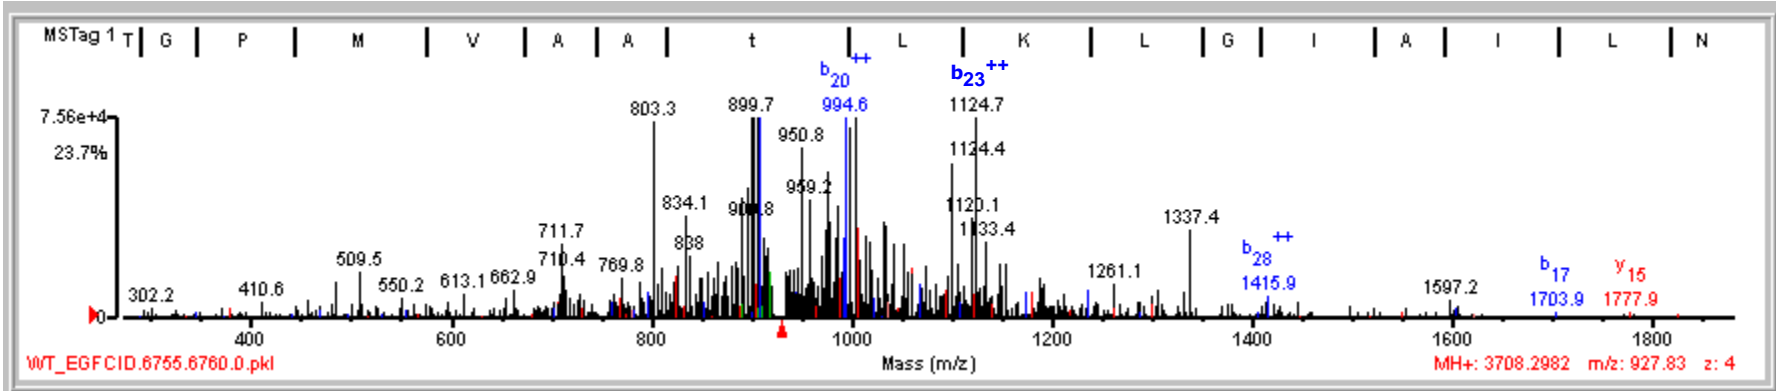

| Rank                    | Score  | SPI (%)                                         | BCS                           | # Unmatched Ions | Variable sites                                  | Sequence                                                                                | MH <sup>+</sup> Calculated (Da) | MH <sup>+</sup> Error (Da)    | MH <sup>+</sup> Error (ppm) | Protein MW/pi (Da) | Species      | Accession # | MS-Digest Index #                 | Protein Name                      |        |                                                 |                               |        |                               |                |                                |         |                               |                               |
|-------------------------|--------|-------------------------------------------------|-------------------------------|------------------|-------------------------------------------------|-----------------------------------------------------------------------------------------|---------------------------------|-------------------------------|-----------------------------|--------------------|--------------|-------------|-----------------------------------|-----------------------------------|--------|-------------------------------------------------|-------------------------------|--------|-------------------------------|----------------|--------------------------------|---------|-------------------------------|-------------------------------|
| 1                       | 11.95  | 75.5                                            | 8                             | 9/24             | M3777m<br>T3751t<br>Y3780y                      | (K) G E t G P M V A A T / L K L G I A I / L N / G \ G N S T V Q Q / K m L \ D y L K (E) | 3531.89                         | 176.4068                      | 129.2                       | 564570.7/5.73      | Homo sapiens | 112799847   | 37581                             | cardiac muscle ryanodine receptor |        |                                                 |                               |        |                               |                |                                |         |                               |                               |
| Fragment-ion (m/z)      | 803.26 | 879.97                                          | 890.15                        | 896.42           | 899.73                                          | 902.89                                                                                  | 905.88                          | 908.71                        | 915.49                      | 950.80             | 959.23       | 969.71      | 976.96                            | 978.65                            | 983.69 | 993.28                                          | 994.55                        | 999.09 | 1003.37                       | 1006.10        | 1031.38                        | 1099.71 | 1124.01                       | 1124.36                       |
| Frac. Inten. (% of TIC) | 2.63   | 1.78                                            | 2.30                          | 0.08             | 15.79                                           | 0.13                                                                                    | 4.63                            | 13.62                         | 2.16                        | 2.42               | 2.89         | 1.90        | 1.91                              | 2.11                              | 3.57   | 2.55                                            | 3.90                          | 2.96   | 15.75                         | 2.39           | 2.05                           | 3.87    | 2.57                          | 6.01                          |
| Rel. Inten. (% of BP)   | 16.67  | 11.27                                           | 14.56                         | 0.49             | 100.00                                          | 0.85                                                                                    | 29.32                           | 86.23                         | 13.67                       | 15.34              | 18.31        | 12.04       | 12.07                             | 13.38                             | 22.63  | 16.17                                           | 24.69                         | 18.75  | 99.74                         | 15.12          | 13.00                          | 24.49   | 16.25                         | 38.07                         |
| Score                   | -0.17  | 0.50                                            | 1.00                          | 1.00             | 0.50                                            | 1.50                                                                                    | 1.00                            | 1.00                          | -0.14                       | -0.15              | -0.18        | -0.12       | 0.50                              | -0.13                             | -0.23  | 0.50                                            | 1.00                          | -0.19  | 1.00                          | 1.00           | 1.00                           | -0.24   | 1.00                          | 1.00                          |
| Ion-type                |        | y <sup>++</sup> <sub>15</sub> -H <sub>2</sub> O | y <sup>++</sup> <sub>16</sub> | m                | b <sup>++</sup> <sub>18</sub> -H <sub>2</sub> O | sty                                                                                     | y <sup>+++</sup> <sub>24</sub>  | b <sup>++</sup> <sub>18</sub> |                             |                    |              |             | b <sub>10</sub> -H <sub>2</sub> O |                                   |        | y <sup>++</sup> <sub>17</sub> -H <sub>2</sub> O | b <sup>++</sup> <sub>20</sub> |        | y <sup>++</sup> <sub>17</sub> | y <sub>7</sub> | b <sup>+++</sup> <sub>30</sub> |         | b <sup>++</sup> <sub>23</sub> | b <sup>++</sup> <sub>23</sub> |
| Delta Da                |        | -0.44                                           | 0.74                          | 0.71             | -0.25                                           | -0.33                                                                                   | 0.73                            | -0.28                         |                             |                    |              |             | -0.42                             |                                   |        | -0.69                                           | 0.03                          |        | 0.39                          | -0.37          | 0.52                           |         | 0.44                          | 0.79                          |

# Peak 434

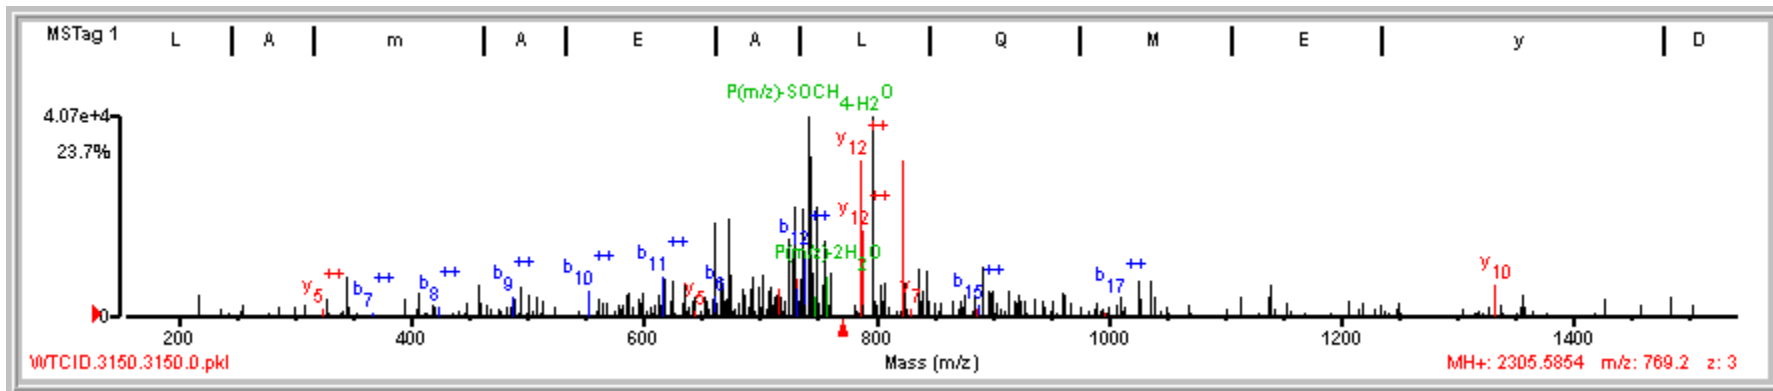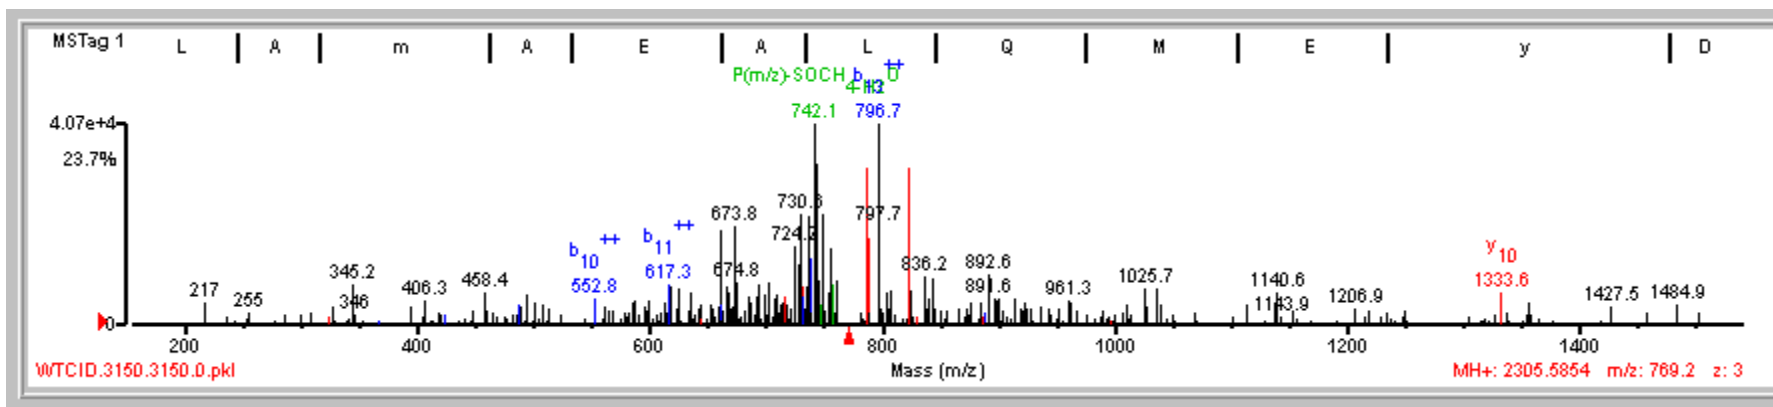

| Rank                   | Score             | SPI (%) | BCS            | # Unmatched Ions  | Variable sites     | Sequence                                     | MH* Calculated (Da) | MH* Error (Da)    | MH* Error (ppm) | Protein MW/pl (Da) | Species           | Accession # | MS-Digest Index # | Protein Name                                         |        |                                     |                   |                   |                |        |
|------------------------|-------------------|---------|----------------|-------------------|--------------------|----------------------------------------------|---------------------|-------------------|-----------------|--------------------|-------------------|-------------|-------------------|------------------------------------------------------|--------|-------------------------------------|-------------------|-------------------|----------------|--------|
| 1                      | 11.35             | 82.9    | 8              | 7/20              | M26m Y34y          | (K)E L A m A E A L Q M E y D A L S R L R (H) | 2210.09             | 95.4910           | -203.9          | 184826.9/6.87      | Homo sapiens      | 15451926    | 13260             | phosphoinositide-3-kinase, class 2, beta polypeptide |        |                                     |                   |                   |                |        |
| Fragment-ion (m/z)     | 617.31            | 624.95  | 660.59         | 666.80            | 673.81             | 724.25                                       | 727.87              | 730.61            | 734.63          | 736.46             | 738.46            | 742.11      | 746.51            | 748.54                                               | 760.70 | 787.57                              | 796.69            | 823.35            | 844.74         | 891.56 |
| Frac. Inten.(% of TIC) | 3.10              | 2.45    | 3.67           | 2.44              | 4.38               | 3.01                                         | 2.11                | 5.21              | 2.18            | 0.12               | 2.84              | 1.19        | 2.63              | 0.16                                                 | 2.27   | 8.03                                | 43.08             | 6.67              | 2.04           | 2.42   |
| Rel. Inten.(% of BP)   | 7.19              | 5.68    | 8.53           | 5.67              | 10.17              | 7.00                                         | 4.89                | 12.09             | 5.06            | 0.27               | 6.59              | 2.77        | 6.12              | 0.37                                                 | 5.28   | 18.63                               | 100.00            | 15.49             | 4.73           | 5.61   |
| Score                  | 1.00              | -0.06   | 1.00           | 1.00              | 1.00               | -0.07                                        | -0.05               | 1.00              | -0.05           | 1.50               | 1.00              | 0.25        | -0.06             | -0.05                                                | -0.05  | 1.00                                | 1.00              | 1.00              | 1.00           | -0.06  |
| Ion-type               | b <sup>++11</sup> |         | b <sub>e</sub> | y <sup>++10</sup> | b <sup>+++17</sup> |                                              |                     | y <sup>++11</sup> |                 | sty                | b <sup>++12</sup> | m           |                   | m                                                    |        | b <sup>++13</sup> -H <sub>2</sub> O | b <sup>++13</sup> | y <sup>++13</sup> | b <sub>8</sub> |        |
| Delta Da               | 0.03              |         | -0.70          | -0.50             | 0.19               |                                              |                     | -0.72             |                 | -0.24              | -0.33             | 0.09        |                   |                                                      |        | 0.27                                | 0.38              | -0.04             | -0.67          |        |
|                        |                   |         |                |                   |                    |                                              |                     |                   |                 |                    |                   |             |                   |                                                      |        | -0.30                               |                   |                   |                |        |



# Peak 437

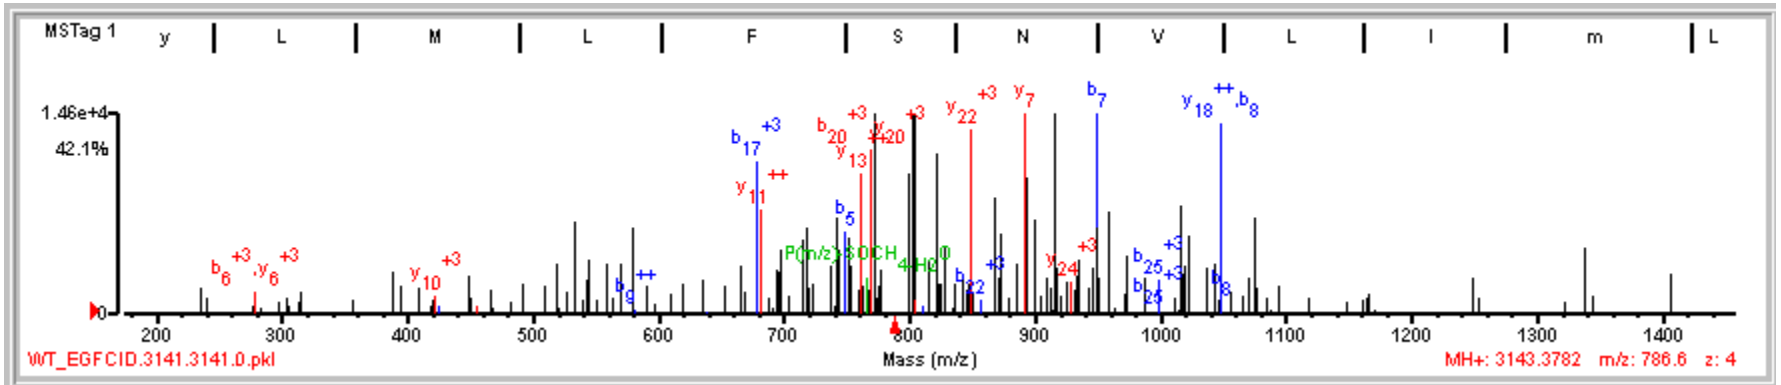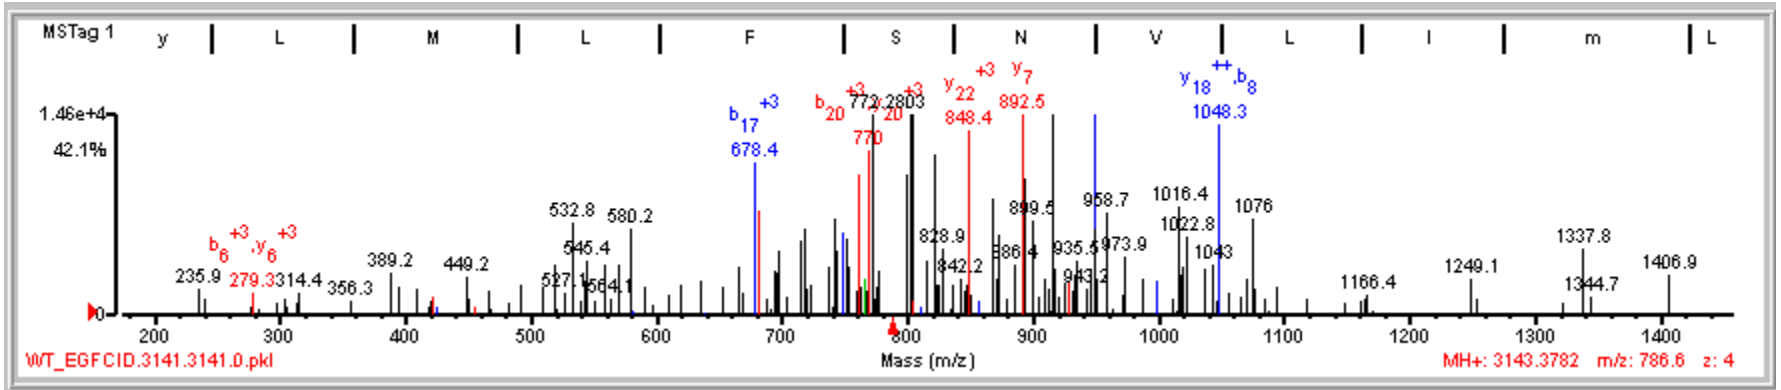

| Rank                    | Score  | SPI (%)            | BCS                | # Unmatched Ions | Variable sites                       | Sequence                                                                 | MH <sup>+</sup> Calculated (Da) | MH <sup>+</sup> Error (Da) | MH <sup>+</sup> Error (ppm) | Protein MW/pl (Da) | Species            | Accession #              | MS-Digest Index #     | Protein Name                                   |                |        |                |                    |                    |         |
|-------------------------|--------|--------------------|--------------------|------------------|--------------------------------------|--------------------------------------------------------------------------|---------------------------------|----------------------------|-----------------------------|--------------------|--------------------|--------------------------|-----------------------|------------------------------------------------|----------------|--------|----------------|--------------------|--------------------|---------|
| 1                       | 9.33   | 62.3               | 9                  | 8/20             | M480m Y470y Y492y                    | (R)Y L M L M / F / S N V L I M L I S / A S P / R M S I G F I Y Q G K (I) | 2966.53                         | 176.8441                   | 291.6                       | 87499.4/5.79       | Homo sapiens       | <a href="#">22027525</a> | <a href="#">18602</a> | Rac/Cdc42 guanine nucleotide exchange factor 6 |                |        |                |                    |                    |         |
| Fragment-ion (m/z)      | 532.75 | 678.45             | 682.40             | 742.63           | 751.77                               | 761.30                                                                   | 768.58                          | 772.20                     | 799.62                      | 803.05             | 804.33             | 821.52                   | 848.45                | 867.45                                         | 892.49         | 915.87 | 949.43         | 1016.40            | 1048.32            | 1075.97 |
| Frac. Inten. (% of TIC) | 2.57   | 3.24               | 2.22               | 4.53             | 3.06                                 | 3.57                                                                     | 5.71                            | 6.64                       | 2.95                        | 4.30               | 9.62               | 3.38                     | 4.34                  | 2.48                                           | 14.09          | 10.91  | 6.95           | 2.29               | 4.29               | 2.84    |
| Rel. Inten. (% of BP)   | 18.27  | 23.01              | 15.77              | 32.12            | 21.71                                | 25.37                                                                    | 40.53                           | 47.15                      | 20.93                       | 30.53              | 68.25              | 23.97                    | 30.80                 | 17.58                                          | 100.00         | 77.42  | 49.31          | 16.27              | 30.48              | 20.14   |
| Score                   | -0.18  | 1.00               | 1.00               | -0.32            | 1.00                                 | 1.00                                                                     | 1.00                            | -0.47                      | 1.00                        | -0.31              | 1.00               | -0.24                    | 1.00                  | -0.18                                          | 1.00           | -0.77  | 1.00           | 1.00               | 1.00               | -0.20   |
| Ion-type                |        | b+++ <sub>17</sub> | y+++ <sub>11</sub> |                  | b+++ <sub>19</sub>                   | y+++ <sub>13</sub>                                                       | b+++ <sub>12</sub>              |                            | y+++ <sub>21</sub>          |                    | y+++ <sub>14</sub> |                          | y+++ <sub>22</sub>    |                                                | y <sub>7</sub> |        | b <sub>7</sub> | b+++ <sub>17</sub> | b <sub>8</sub>     |         |
| Delta Da                |        | 0.11               | 0.08               |                  | 0.74                                 | -0.05                                                                    | 0.70                            |                            | 0.56                        |                    | -0.54              |                          | 0.37                  |                                                | 0.09           |        | 0.04           | -0.60              | -0.14              |         |
|                         |        |                    |                    |                  | y+++ <sub>13</sub> -H <sub>2</sub> O |                                                                          |                                 |                            |                             |                    |                    |                          |                       |                                                |                |        |                |                    | y+++ <sub>18</sub> |         |
|                         |        |                    |                    |                  | -0.57                                |                                                                          |                                 |                            |                             |                    |                    |                          |                       |                                                |                |        |                |                    | 0.31               |         |
|                         |        |                    |                    |                  |                                      |                                                                          |                                 |                            |                             |                    |                    |                          |                       |                                                |                |        |                |                    | y+++ <sub>26</sub> |         |
|                         |        |                    |                    |                  |                                      |                                                                          |                                 |                            |                             |                    |                    |                          |                       |                                                |                |        |                |                    | 1048.32            |         |

# Peak 438

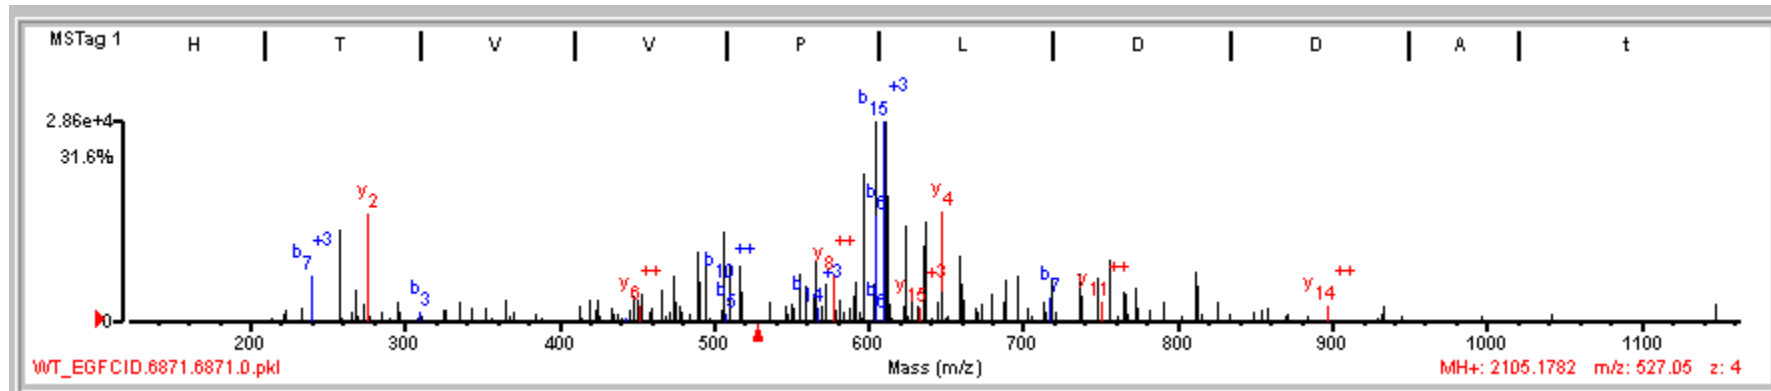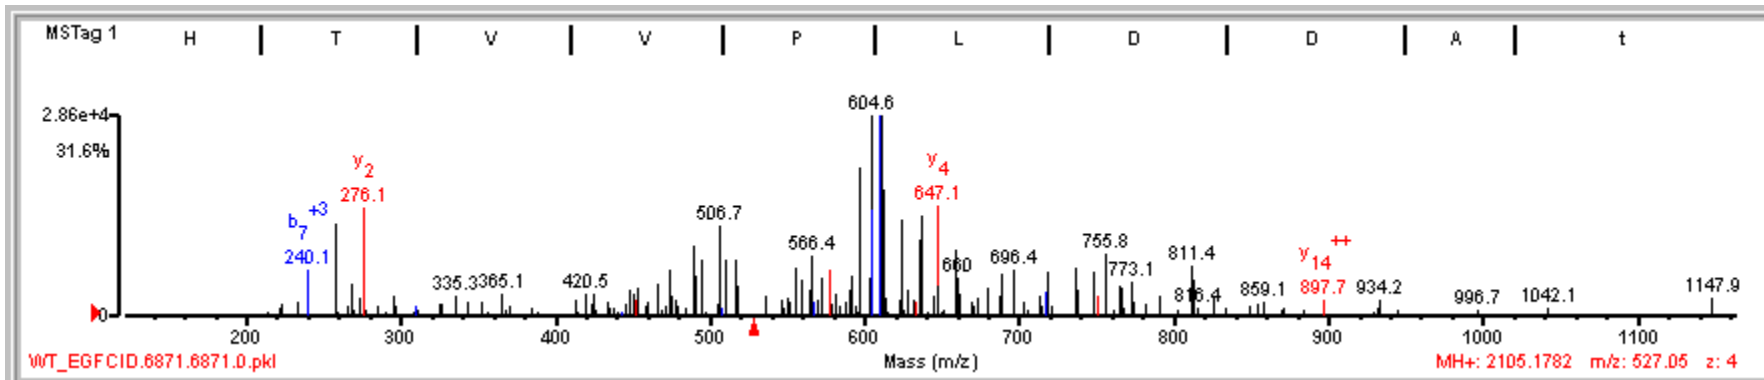

| Rank | Score | SPI (%) | BCS | # Unmatched Ions | Variable sites | Sequence                                  | MH <sup>+</sup> Calculated (Da) | MH <sup>+</sup> Error (Da) | MH <sup>+</sup> Error (ppm) | Protein MW/pI (Da) | Species      | Accession #              | MS-Digest Index #     | Protein Name                             |
|------|-------|---------|-----|------------------|----------------|-------------------------------------------|---------------------------------|----------------------------|-----------------------------|--------------------|--------------|--------------------------|-----------------------|------------------------------------------|
| 1    | 10.29 | 76.5    | 8   | 7/19             | T147t Y150y    | (R) A H T V/V P\L\D/D A\t Q E/y K E K (L) | 1943.97                         | 161.2073                   | 605.5                       | 59690.7/7.80       | Homo sapiens | <a href="#">25777696</a> | <a href="#">7254</a>  | tripartite motif-containing 39 isoform 1 |
| 1    | 10.29 | 76.5    | 8   | 7/19             | T147t Y150y    | (R) A H T V/V P\L\D/D A\t Q E/y K E K (L) | 1943.97                         | 161.2073                   | 605.5                       | 56374.8/6.73       | Homo sapiens | <a href="#">25777698</a> | <a href="#">26230</a> | tripartite motif-containing 39 isoform 2 |

| Fragment-ion (m/z)      | 258.11                           | 276.10         | 474.06                        | 490.21                           | 506.72 | 510.09                         | 566.35                         | 578.28                       | 597.45 | 604.63         | 610.34                         | 613.23 | 624.24 | 635.55                       | 647.09         | 659.04 | 718.04         | 737.04 | 765.44 |
|-------------------------|----------------------------------|----------------|-------------------------------|----------------------------------|--------|--------------------------------|--------------------------------|------------------------------|--------|----------------|--------------------------------|--------|--------|------------------------------|----------------|--------|----------------|--------|--------|
| Frac. Inten. (% of TIC) | 3.04                             | 3.60           | 2.15                          | 3.51                             | 3.27   | 2.99                           | 2.42                           | 2.63                         | 4.64   | 10.23          | 33.17                          | 4.67   | 3.04   | 5.55                         | 5.05           | 3.37   | 2.16           | 2.34   | 2.17   |
| Rel. Inten. (% of BP)   | 9.15                             | 10.85          | 6.49                          | 10.59                            | 9.86   | 9.01                           | 7.30                           | 7.92                         | 13.99  | 30.84          | 100.00                         | 14.07  | 9.16   | 16.74                        | 15.22          | 10.17  | 6.52           | 7.06   | 6.54   |
| Score                   | 0.50                             | 1.00           | 1.00                          | 0.50                             | -0.10  | 1.00                           | 1.00                           | 1.00                         | -0.14  | 1.00           | 1.00                           | -0.14  | -0.09  | 1.00                         | 1.00           | -0.10  | 1.00           | -0.07  | -0.07  |
| Ion-type                | y <sub>2</sub> -H <sub>2</sub> O | y <sub>2</sub> | b <sub>7</sub> <sup>+++</sup> | b <sub>6</sub> -H <sub>2</sub> O |        | b <sub>10</sub> <sup>+++</sup> | y <sub>13</sub> <sup>+++</sup> | y <sub>8</sub> <sup>++</sup> |        | b <sub>e</sub> | b <sub>15</sub> <sup>+++</sup> |        |        | y <sub>9</sub> <sup>++</sup> | y <sub>4</sub> |        | b <sub>7</sub> |        |        |
| Delta Da                | -0.03                            | -0.06          | -0.68                         | -0.07                            |        | -0.17                          | 0.45                           | -0.44                        |        | -0.71          | 0.08                           |        |        | -0.68                        | -0.19          |        | -0.38          |        |        |







# Peak 441

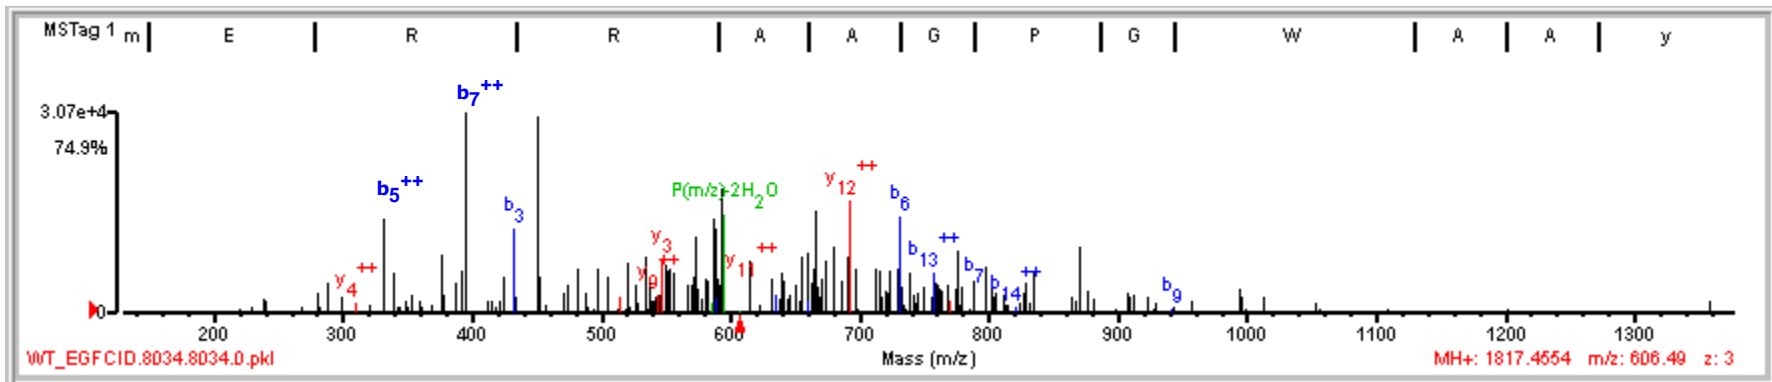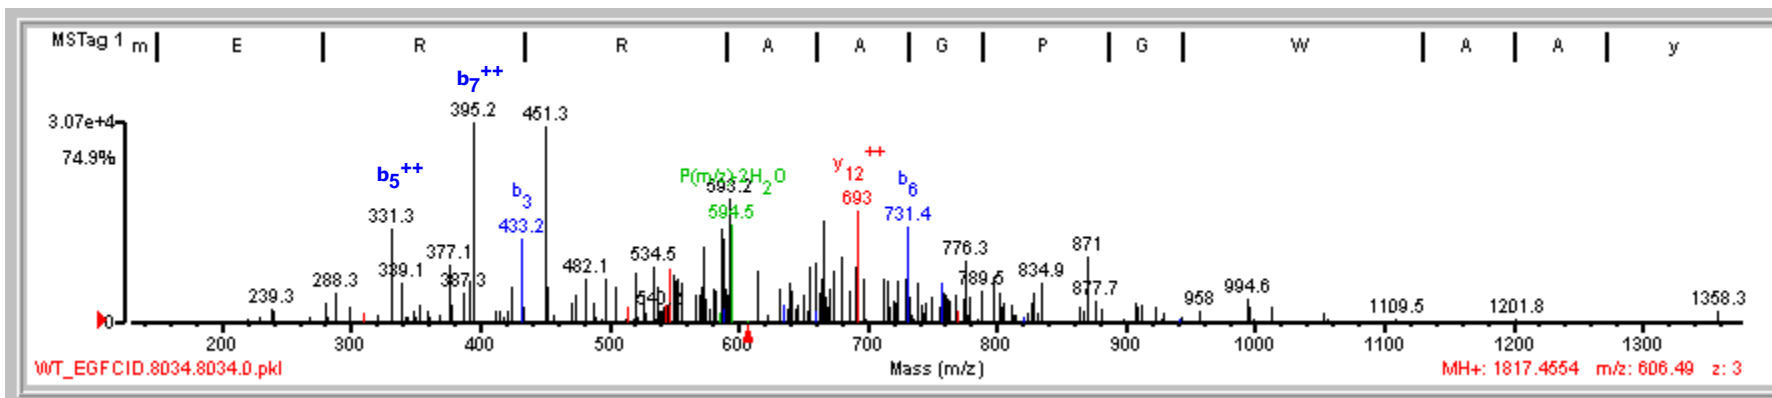

| Rank                    | Score            | SPI (%)            | BCS              | # Unmatched Ions | Variable sites | Sequence                              | MH <sup>+</sup> Calculated (Da) | MH <sup>+</sup> Error (Da) | MH <sup>+</sup> Error (ppm) | Protein MW/pl (Da) | Species        | Accession #              | MS-Digest Index #     | Protein Name                                    |                |        |                   |
|-------------------------|------------------|--------------------|------------------|------------------|----------------|---------------------------------------|---------------------------------|----------------------------|-----------------------------|--------------------|----------------|--------------------------|-----------------------|-------------------------------------------------|----------------|--------|-------------------|
| 1                       | 8.60             | 58.5               | 7                | 6/17             | M1m Y13y       | (-)m/E R R A\A\G\ P G W\A A Y E R (L) | 1720.83                         | 96.6218                    | 363.5                       | 184600.6/7.21      | Homo sapiens   | <a href="#">39753961</a> | <a href="#">19223</a> | IQ motif containing GTPase activating protein 3 |                |        |                   |
| Fragment-ion (m/z)      | 331.31           | 377.10             | 395.17           | 433.25           | 451.28         | 550.47                                | 573.86                          | 587.13                     | 588.66                      | 614.77             | 659.64         | 664.53                   | 666.70                | 692.97                                          | 731.45         | 776.30 | 834.91            |
| Frac. Inten. (% of TIC) | 6.30             | 3.87               | 14.31            | 5.21             | 11.90          | 5.91                                  | 0.15                            | 4.76                       | 5.03                        | 4.14               | 3.79           | 4.31                     | 8.02                  | 5.61                                            | 6.25           | 6.62   | 3.80              |
| Rel. Inten. (% of BP)   | 44.05            | 27.03              | 100.00           | 36.37            | 83.17          | 41.31                                 | 1.07                            | 33.22                      | 35.17                       | 28.95              | 26.51          | 30.08                    | 56.05                 | 39.21                                           | 43.70          | 46.26  | 26.52             |
| Score                   | 1.00             | 1.00               | 1.00             | 1.00             | -0.83          | -0.41                                 | 1.50                            | -0.33                      | 1.00                        | 1.00               | 1.00           | -0.30                    | -0.56                 | 1.00                                            | 1.00           | -0.46  | 1.00              |
| Ion-type                | b <sup>++5</sup> | b <sup>+++10</sup> | b <sup>++7</sup> | b <sub>3</sub>   |                |                                       | sty                             |                            | b <sub>4</sub>              | y <sup>+++11</sup> | b <sub>5</sub> |                          |                       | y <sup>++12</sup>                               | b <sub>6</sub> |        | y <sup>++14</sup> |
| Delta Da                | 0.64             | 0.25               | 0.47             | 0.06             |                |                                       | 0.25                            |                            | -0.63                       | 0.01               | -0.68          |                          |                       | 0.16                                            | 0.09           |        | -0.47             |



# Peak 443

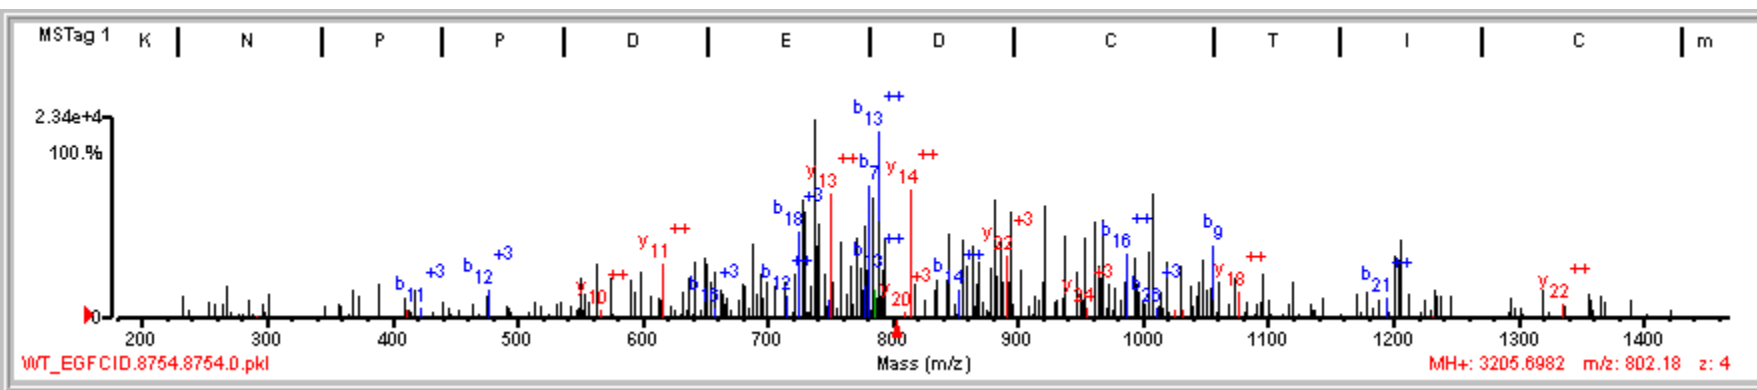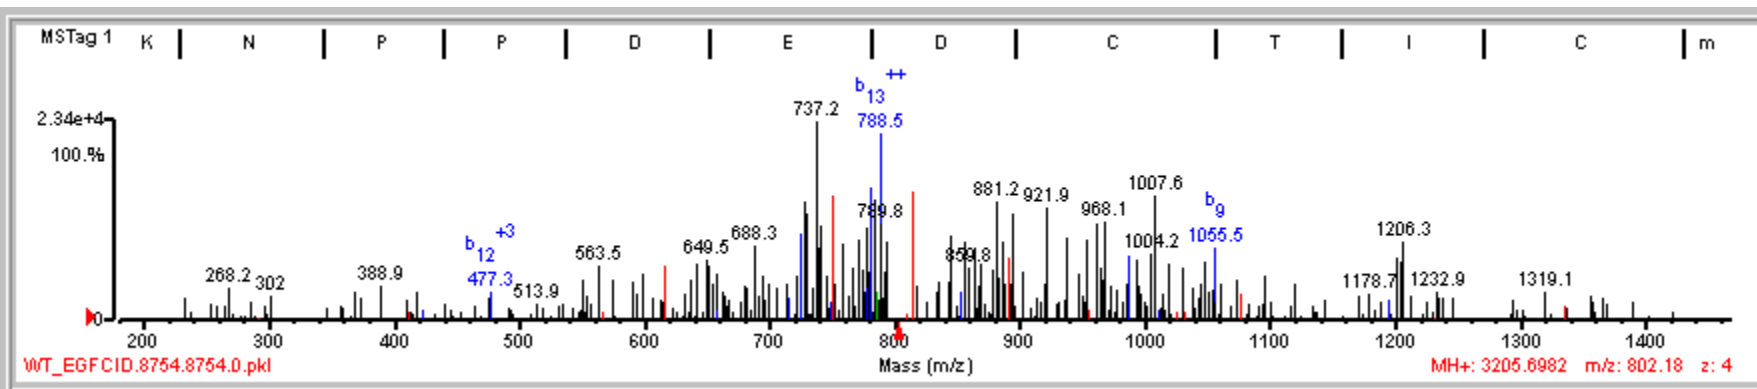

| Rank                   | Score  | SPI (%)            | BCS    | # Unmatched Ions | # Variable sites                    | Sequence                                                        | MH <sup>+</sup> Calculated (Da) | MH <sup>+</sup> Error (Da) | MH <sup>+</sup> Error (ppm) | Protein MW/pI (Da) | Species            | Accession #              | MS-Digest Index #               | Protein Name     |        |                    |                |                    |                |        |        |                    |         |                |
|------------------------|--------|--------------------|--------|------------------|-------------------------------------|-----------------------------------------------------------------|---------------------------------|----------------------------|-----------------------------|--------------------|--------------------|--------------------------|---------------------------------|------------------|--------|--------------------|----------------|--------------------|----------------|--------|--------|--------------------|---------|----------------|
| 1                      | 10.48  | 56.0               | 10     | 9/24             | M415m Y424y                         | (K) V K/N P P/D E\ D\C\T I C m\ E/R L V T\A/S G y E\G V L R (H) | 3109.48                         | 96.2231                    | 81.7                        | 67368.8/9.67       | Homo sapiens       | <a href="#">41352718</a> | <a href="#">26104</a>           | deltex homolog 1 |        |                    |                |                    |                |        |        |                    |         |                |
| Fragment-ion (m/z)     | 550.40 | 725.78             | 728.49 | 737.21           | 741.44                              | 751.13                                                          | 771.68                          | 777.68                     | 780.67                      | 784.75             | 788.52             | 815.51                   | 855.71                          | 881.23           | 886.83 | 891.09             | 894.84         | 921.93             | 961.07         | 968.13 | 986.30 | 994.03             | 1007.64 | 1055.50        |
| Frac. Inten.(% of TIC) | 2.71   | 2.70               | 7.33   | 10.00            | 3.10                                | 3.89                                                            | 2.70                            | 0.16                       | 4.12                        | 6.19               | 10.96              | 3.99                     | 3.10                            | 4.08             | 3.59   | 3.91               | 3.29           | 3.51               | 4.67           | 3.06   | 3.17   | 3.01               | 3.89    | 2.87           |
| Rel. Inten.(% of BP)   | 24.68  | 24.59              | 66.84  | 91.25            | 28.27                               | 35.49                                                           | 24.62                           | 1.49                       | 37.60                       | 56.49              | 100.00             | 36.42                    | 28.27                           | 37.19            | 32.78  | 35.62              | 29.98          | 31.99              | 42.58          | 27.92  | 28.88  | 27.49              | 35.49   | 26.16          |
| Score                  | -0.25  | 1.00               | -0.67  | -0.91            | 0.50                                | 1.00                                                            | 1.00                            | 1.50                       | 1.00                        | -0.56              | 1.00               | 1.00                     | 0.50                            | -0.37            | -0.33  | 1.00               | 1.00           | 1.00               | 1.00           | -0.28  | -0.29  | 1.00               | -0.35   | 1.00           |
| Ion-type               |        | b+++ <sub>18</sub> |        |                  | y++ <sub>13</sub> -H <sub>2</sub> O | y+++ <sub>13</sub>                                              | y+++ <sub>19</sub>              | sty                        | b <sub>7</sub>              |                    | b+++ <sub>13</sub> | y+++ <sub>14</sub>       | y <sub>7</sub> -NH <sub>3</sub> |                  |        | y+++ <sub>22</sub> | b <sub>8</sub> | b+++ <sub>23</sub> | y <sub>8</sub> |        |        | y+++ <sub>25</sub> |         | b <sub>9</sub> |
| Delta Da               |        | 0.11               |        |                  | -0.44                               | 0.25                                                            | 0.67                            | 0.06                       | 0.28                        |                    | -0.31              | 0.11                     | -0.65                           |                  |        | 0.38               | -0.58          | 0.54               | 0.65           |        |        | 0.60               |         | 0.05           |





# Peak 446

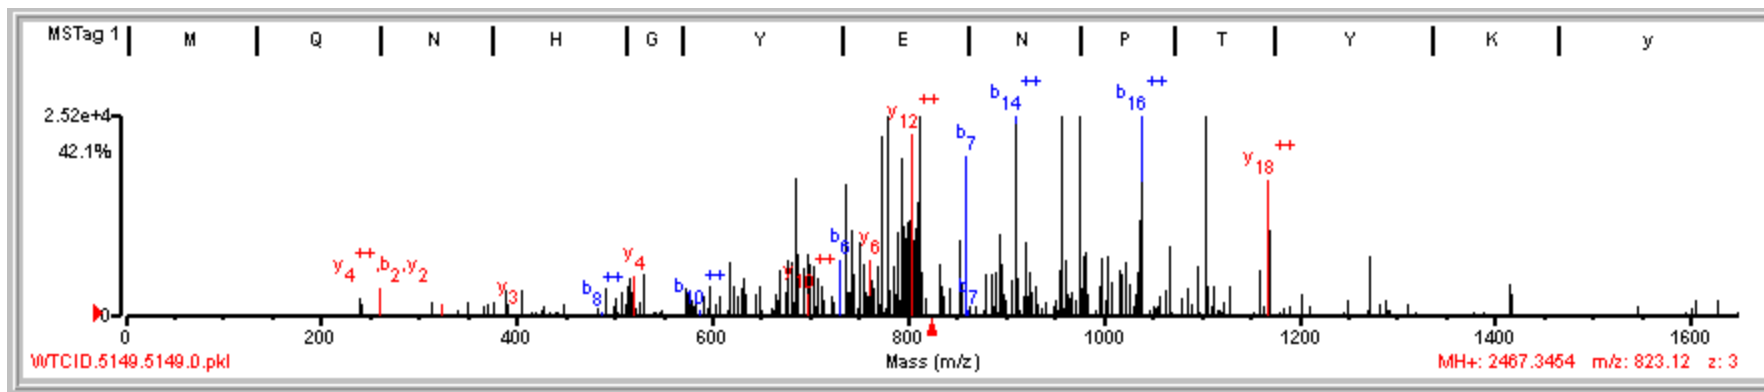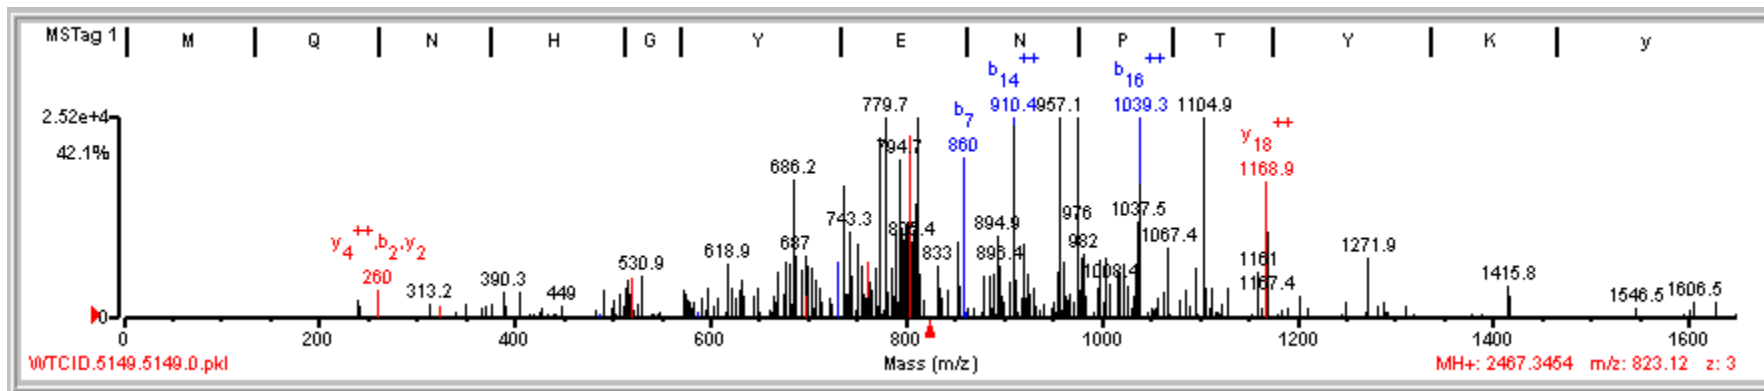

| Fragment-ion (m/z)      | 686.21                        | 698.25                         | 737.07                           | 743.31 | 750.35 | 773.54 | 779.74                         | 790.21 | 794.66                                          | 798.44 | 802.49 | 804.63                        | 859.95         | 910.45                         | 957.14                          | 975.51                         | 1039.32                        | 1104.93                        | 1168.93                        |
|-------------------------|-------------------------------|--------------------------------|----------------------------------|--------|--------|--------|--------------------------------|--------|-------------------------------------------------|--------|--------|-------------------------------|----------------|--------------------------------|---------------------------------|--------------------------------|--------------------------------|--------------------------------|--------------------------------|
| Frac. Inten. (% of TIC) | 3.66                          | 3.07                           | 2.61                             | 2.38   | 2.47   | 3.74   | 10.46                          | 0.10   | 2.90                                            | 3.16   | 3.73   | 5.00                          | 3.05           | 11.75                          | 6.41                            | 8.09                           | 8.92                           | 14.33                          | 4.19                           |
| Rel. Inten. (% of BP)   | 25.51                         | 21.45                          | 18.19                            | 16.58  | 17.21  | 26.14  | 72.98                          | 0.67   | 20.24                                           | 22.08  | 26.05  | 34.87                         | 21.30          | 82.00                          | 44.71                           | 56.46                          | 62.25                          | 100.00                         | 29.23                          |
| Score                   | -0.26                         | 1.00                           | 1.00                             | 0.50   | -0.17  | -0.26  | 1.00                           | 1.50   | 0.50                                            | -0.22  | -0.26  | 1.00                          | 1.00           | 1.00                           | 0.50                            | 1.00                           | 1.00                           | 1.00                           | 1.00                           |
| Ion-type                | y <sup>++</sup> <sub>10</sub> | b <sup>+++</sup> <sub>17</sub> | y <sub>6</sub> -H <sub>2</sub> O |        |        |        | b <sup>+++</sup> <sub>18</sub> | sty    | y <sup>++</sup> <sub>12</sub> -H <sub>2</sub> O |        |        | y <sup>++</sup> <sub>12</sub> | b <sub>7</sub> | b <sup>+++</sup> <sub>14</sub> | b <sub>8</sub> -NH <sub>3</sub> | b <sup>+++</sup> <sub>15</sub> | b <sup>+++</sup> <sub>16</sub> | b <sup>+++</sup> <sub>17</sub> | b <sup>+++</sup> <sub>18</sub> |
| Delta Da                |                               | -0.56                          | 0.43                             | -0.07  |        |        | 0.42                           | -0.15  | -0.70                                           |        |        | 0.27                          | -0.39          | 0.07                           | -0.21                           | 0.61                           | 0.39                           | 0.48                           | 0.45                           |
|                         |                               |                                | y <sup>+++</sup> <sub>17</sub>   |        |        |        | y <sup>+++</sup> <sub>18</sub> |        |                                                 |        |        |                               |                |                                |                                 |                                |                                | y <sup>+++</sup> <sub>17</sub> | y <sup>+++</sup> <sub>18</sub> |
|                         |                               |                                | 0.42                             |        |        |        | 0.40                           |        |                                                 |        |        |                               |                |                                |                                 |                                |                                | 0.45                           | 0.42                           |

# Peak 447

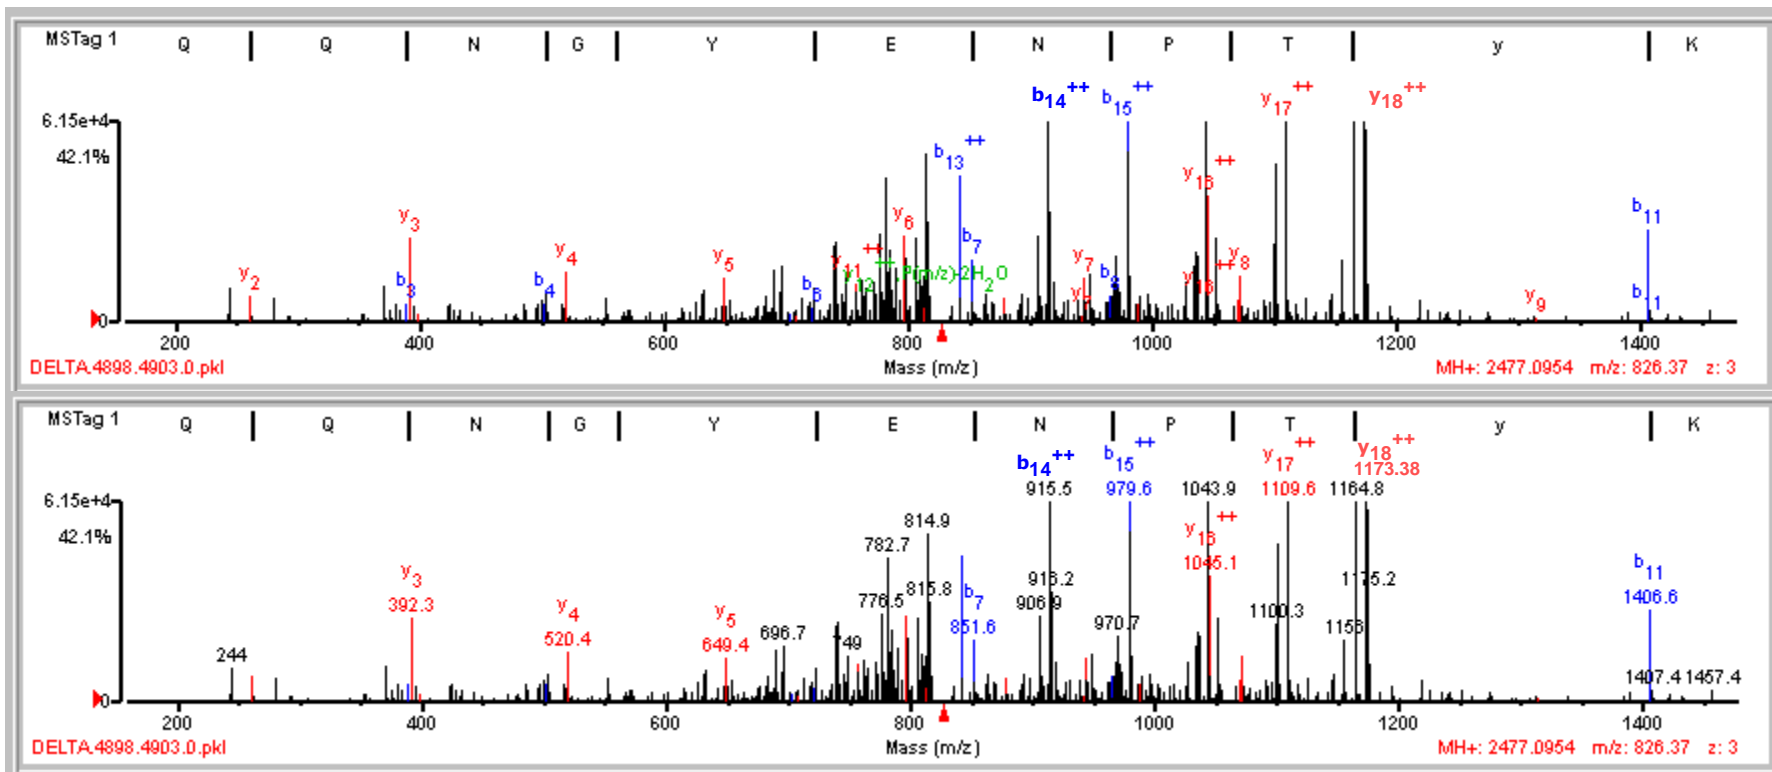

| Rank                    | Score  | SPI (%)            | BCS                | # Unmatched Ions | Variable sites | Sequence                                     | MH <sup>+</sup> Calculated (Da) | MH <sup>+</sup> Error (Da) | MH <sup>+</sup> Error (ppm) | Protein MW/pi (Da) | Species            | Accession #    | MS-Digest Index #                    | Protein Name                                 |                |                                      |                    |                                      |                                  |                                      |         |                    |                                      |                    |                 |
|-------------------------|--------|--------------------|--------------------|------------------|----------------|----------------------------------------------|---------------------------------|----------------------------|-----------------------------|--------------------|--------------------|----------------|--------------------------------------|----------------------------------------------|----------------|--------------------------------------|--------------------|--------------------------------------|----------------------------------|--------------------------------------|---------|--------------------|--------------------------------------|--------------------|-----------------|
| 1                       | 14.76  | 83.4               | 9                  | 7/25             | Y762y          | (K)M/Q/Q N G Y E N P T y\K/F\F\B\Q\M\Q\N (-) | 2397.03                         | 80.0680                    | 41.0                        | 86943.8/4.73       | Homo sapiens       | 4502167        | 2523                                 | amyloid beta A4 protein precursor, isoform a |                |                                      |                    |                                      |                                  |                                      |         |                    |                                      |                    |                 |
| Fragment-ion (m/z)      | 690.47 | 696.34             | 739.99             | 748.54           | 776.46         | 782.67                                       | 784.40                          | 796.44                     | 806.07                      | 810.05             | 841.76             | 851.57         | 906.48                               | 915.46                                       | 943.64         | 970.69                               | 979.61             | 1035.11                              | 1043.93                          | 1100.33                              | 1101.67 | 1109.56            | 1164.82                              | 1173.38            | 1406.58         |
| Frac. Inten. (% of TIC) | 1.76   | 1.37               | 2.13               | 1.45             | 3.24           | 2.57                                         | 1.86                            | 2.26                       | 1.88                        | 1.40               | 2.37               | 1.36           | 2.59                                 | 5.12                                         | 1.64           | 2.48                                 | 6.76               | 1.90                                 | 12.82                            | 1.62                                 | 5.01    | 8.00               | 4.18                                 | 22.54              | 1.70            |
| Rel. Inten. (% of BP)   | 7.81   | 6.06               | 9.43               | 6.43             | 14.38          | 11.40                                        | 8.24                            | 10.02                      | 8.34                        | 6.19               | 10.54              | 6.03           | 11.48                                | 22.70                                        | 7.28           | 10.99                                | 29.99              | 8.44                                 | 56.85                            | 7.18                                 | 22.23   | 35.47              | 18.56                                | 100.00             | 7.56            |
| Score                   | -0.08  | 1.00               | 1.00               | -0.06            | -0.14          | 1.00                                         | -0.08                           | 1.00                       | -0.08                       | -0.06              | 1.00               | 1.00           | 0.50                                 | 1.00                                         | 1.00           | 0.50                                 | 1.00               | 0.50                                 | 1.00                             | 0.50                                 | -0.22   | 1.00               | 0.50                                 | 1.00               | 1.00            |
| Ion-type                |        | b+++ <sub>16</sub> | b+++ <sub>17</sub> |                  |                | b+++ <sub>18</sub>                           |                                 | y <sub>6</sub>             |                             |                    | b+++ <sub>13</sub> | b <sub>7</sub> | b+++ <sub>14</sub> -H <sub>2</sub> O | b+++ <sub>14</sub>                           | y <sub>7</sub> | b+++ <sub>15</sub> -H <sub>2</sub> O | b+++ <sub>15</sub> | a <sub>9</sub>                       | b+++ <sub>16</sub>               | b+++ <sub>17</sub> -H <sub>2</sub> O |         | b+++ <sub>17</sub> | y+++ <sub>18</sub> -H <sub>2</sub> O | b+++ <sub>18</sub> | b <sub>11</sub> |
| Delta Da                |        | 0.39               | 0.36               |                  |                | 0.35                                         |                                 | 0.11                       |                             |                    | 0.42               | 0.23           | 0.61                                 | 0.59                                         | 0.24           | 0.30                                 | 0.22               | 0.67                                 | 0.51                             | 0.39                                 | 0.62    | 0.34               | 0.41                                 | 0.07               |                 |
|                         |        |                    |                    |                  |                |                                              |                                 |                            |                             |                    |                    |                |                                      |                                              |                |                                      |                    | b+++ <sub>16</sub> -H <sub>2</sub> O | b <sub>9</sub> -H <sub>2</sub> O | y+++ <sub>17</sub> -H <sub>2</sub> O |         | y+++ <sub>17</sub> | y+++ <sub>18</sub>                   |                    |                 |
|                         |        |                    |                    |                  |                |                                              |                                 |                            |                             |                    |                    |                |                                      |                                              |                |                                      |                    | 0.69                                 | -0.49                            | -0.12                                |         | 0.11               |                                      |                    |                 |

# Peak 448

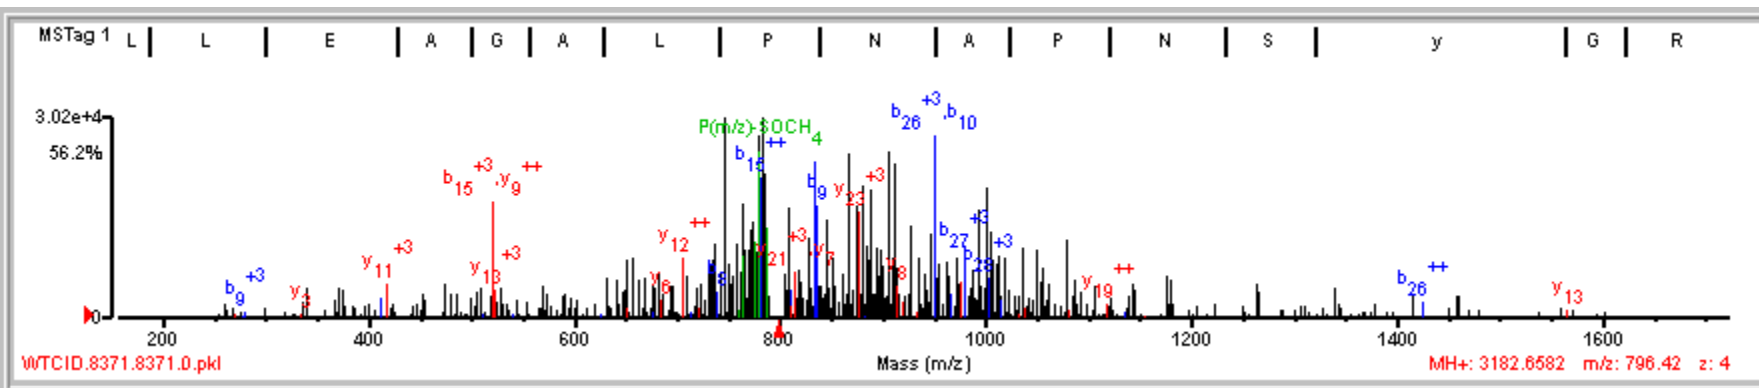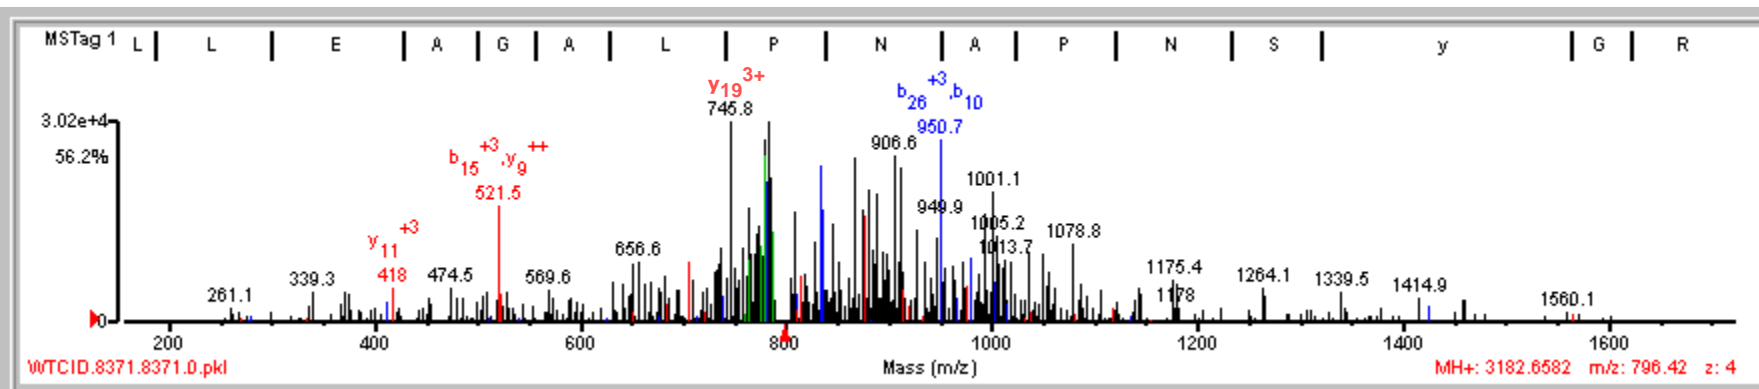

| Rank | Score | SPI (%) | BCS | # Unmatched Ions | Variable sites | Sequence                                                               | MH* Calculated (Da) | MH* Error (Da) | MH* Error (ppm) | Protein MW/pi (Da) | Species      | Accession # | MS-Digest Index # | Protein Name                                   |
|------|-------|---------|-----|------------------|----------------|------------------------------------------------------------------------|---------------------|----------------|-----------------|--------------------|--------------|-------------|-------------------|------------------------------------------------|
| 1    | 10.08 | 65.0    | 7   | 7/22             | M53m M54m Y44y | (R)A L/L E A G A L P I N A P N S Y G R \ R P I / Q V M \ m G S A R (V) | 3071.57             | 111.0882       | -272.7          | 16532.7/5.52       | Homo sapiens | 4502749     | 4367              | cyclin-dependent kinase inhibitor 2A isoform 1 |

| Fragment-ion (m/z)      | 521.46           | 733.10 | 745.79             | 763.73 | 772.55                               | 775.90 | 779.57 | 782.08             | 784.19             | 807.97         | 834.32             | 836.36         | 844.93 | 867.61 | 880.13                               | 884.63 | 889.12             | 906.62 | 912.68 | 950.74          | 993.36          | 1001.08            |
|-------------------------|------------------|--------|--------------------|--------|--------------------------------------|--------|--------|--------------------|--------------------|----------------|--------------------|----------------|--------|--------|--------------------------------------|--------|--------------------|--------|--------|-----------------|-----------------|--------------------|
| Frac. Inten. (% of TIC) | 3.39             | 3.42   | 12.00              | 0.19   | 0.09                                 | 0.12   | 8.64   | 6.74               | 11.13              | 3.81           | 3.98               | 3.47           | 3.64   | 4.32   | 4.11                                 | 4.48   | 3.81               | 4.10   | 6.44   | 4.81            | 4.33            | 2.99               |
| Rel. Inten. (% of BP)   | 28.25            | 28.52  | 100.00             | 1.60   | 0.75                                 | 1.02   | 72.03  | 56.17              | 92.72              | 31.73          | 33.15              | 28.90          | 30.30  | 36.04  | 34.28                                | 37.34  | 31.73              | 34.14  | 53.64  | 40.05           | 36.07           | 24.89              |
| Score                   | 1.00             | -0.29  | 1.00               | 1.00   | 1.50                                 |        | -0.72  | 1.00               | 1.00               | 0.25           | 1.00               | 1.00           | -0.30  | -0.36  | 0.50                                 | -0.37  | 1.00               | -0.34  | -0.54  | 1.00            | 0.25            | 1.00               |
| Ion-type                | y++ <sub>9</sub> |        | y+++ <sub>19</sub> | m      | b+++ <sub>15</sub> -H <sub>2</sub> O | m      |        | b+++ <sub>15</sub> | y+++ <sub>20</sub> | a <sub>9</sub> | b+++ <sub>23</sub> | b <sub>9</sub> |        |        | b+++ <sub>17</sub> -H <sub>2</sub> O |        | b+++ <sub>17</sub> |        |        | b <sub>10</sub> | a <sub>11</sub> | y+++ <sub>27</sub> |
| Delta Da                | -0.27            |        | 0.45               | -0.91  |                                      |        |        | 0.21               | 0.84               | -0.52          | 0.23               | -0.13          |        |        | 0.71                                 |        | 0.69               |        |        | 0.21            | -0.21           | 0.61               |



# Peak 450

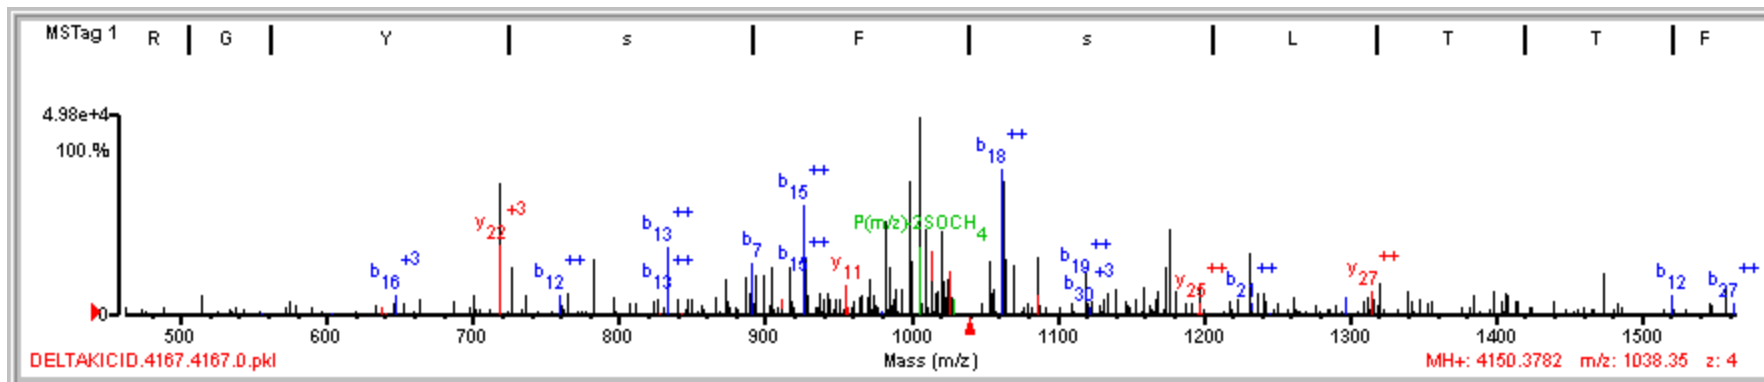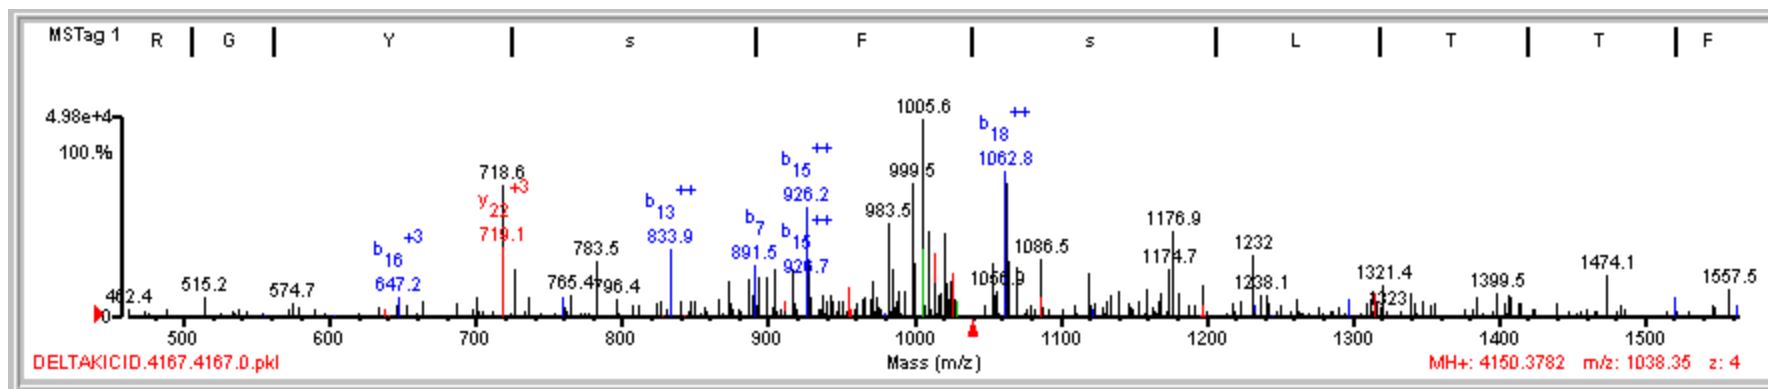

| Rank | Score | SPI (%) | BCS | # Unmatched Ions | Variable sites | Sequence                                                                                            | MH* Calculated (Da) | MH* Error (Da) | MH* Error (ppm) | Protein MW/pl (Da) | Species      | Accession #             | MS-Digest Index #     | Protein Name               |
|------|-------|---------|-----|------------------|----------------|-----------------------------------------------------------------------------------------------------|---------------------|----------------|-----------------|--------------------|--------------|-------------------------|-----------------------|----------------------------|
| 1    | 12.42 | 69.2    | 9   | 8/25             | M1m Y6y S9s    | (-) m A E R G / y S \ F s / L T T F \ S P \ S G K / L V Q I E Y A L A / A V A G G A P S V G I K (A) | 3974.07             | 176.3050       | 90.9            | 25898.7/6.91       | Homo sapiens | <a href="#">4506181</a> | <a href="#">21664</a> | proteasome alpha 2 subunit |

# Peak 451

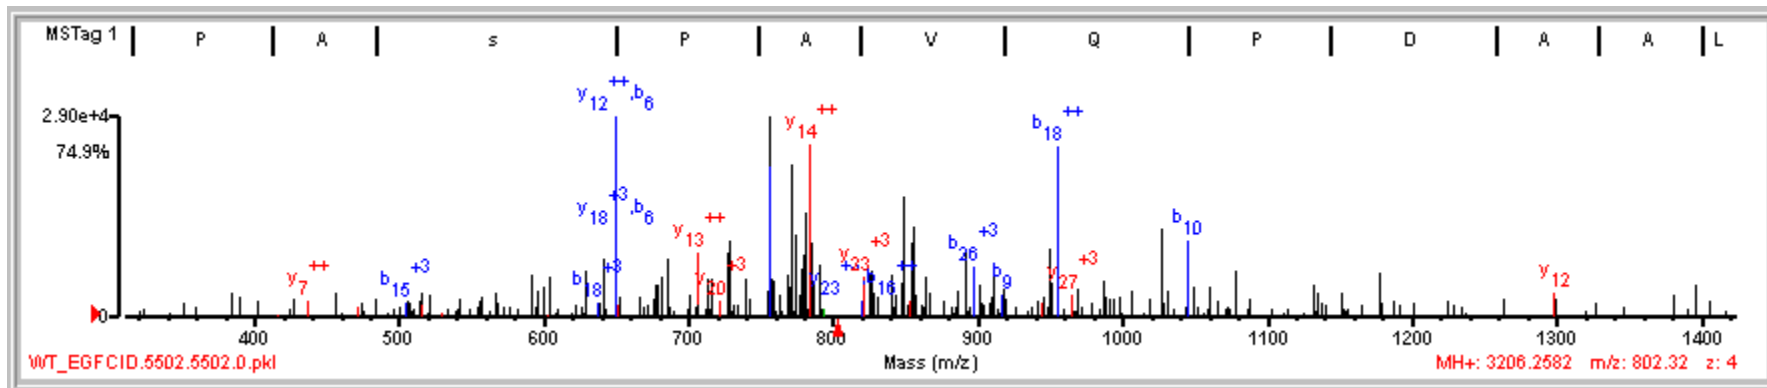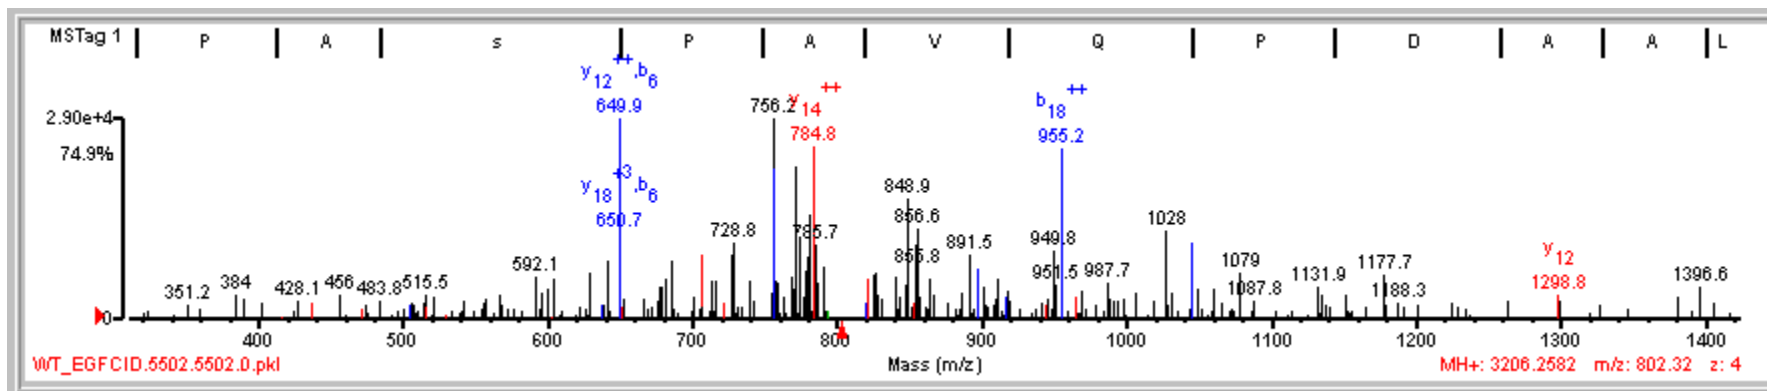

## DETAILED RESULTS

| Rank                    | Score | SPI (%) | BCS | # Unmatched Ions | Variable sites | Sequence                                                                  | MH <sup>+</sup> Calculated (Da)     | MH <sup>+</sup> Error (Da) | MH <sup>+</sup> Error (ppm) | Protein MW/pi (Da)               | Species            | Accession #             | MS-Digest Index #                    | Protein Name                                             |                   |        |                   |                                  |                                 |                                 |                   |                                  |         |                 |
|-------------------------|-------|---------|-----|------------------|----------------|---------------------------------------------------------------------------|-------------------------------------|----------------------------|-----------------------------|----------------------------------|--------------------|-------------------------|--------------------------------------|----------------------------------------------------------|-------------------|--------|-------------------|----------------------------------|---------------------------------|---------------------------------|-------------------|----------------------------------|---------|-----------------|
| 1                       | 11.02 | 90.6    | 7   | 2/17             | Y345y S326s    | (R) G E K P A s P A V Q P D A A L (Q) R / L I A A V L A G y G V E L R (Q) | 3047.66                             | 158.5945                   | -417.4                      | 105848.1/6.66                    | Homo sapiens       | <a href="#">4506321</a> | <a href="#">4501</a>                 | protein tyrosine phosphatase, receptor type, N precursor |                   |        |                   |                                  |                                 |                                 |                   |                                  |         |                 |
| Fragment-ion (m/z)      |       |         |     |                  |                |                                                                           | 641.49                              | 649.91                     | 706.63                      | 728.85                           | 756.24             | 772.25                  | 775.08                               | 779.84                                                   | 784.78            | 840.34 | 848.93            | 855.08                           | 856.65                          | 900.95                          | 955.22            | 1027.95                          | 1045.74 |                 |
| Frac. Inten. (% of TIC) |       |         |     |                  |                |                                                                           | 2.69                                | 13.29                      | 2.81                        | 3.08                             | 19.85              | 6.37                    | 3.03                                 | 6.65                                                     | 9.13              | 3.07   | 5.80              | 4.58                             | 4.13                            | 2.68                            | 6.22              | 3.89                             | 2.78    |                 |
| Rel. Inten. (% of BP)   |       |         |     |                  |                |                                                                           | 13.55                               | 66.96                      | 14.13                       | 15.54                            | 100.00             | 32.10                   | 15.28                                | 33.51                                                    | 46.01             | 15.49  | 29.24             | 22.99                            | 20.78                           | 13.38                           | 31.32             | 19.60                            | 13.88   |                 |
| Score                   |       |         |     |                  |                |                                                                           | 0.50                                | 1.00                       | 1.00                        | 0.50                             | 1.00               | -0.32                   | 0.50                                 | 1.00                                                     | 1.00              | -0.15  | 1.00              | 0.50                             | 0.50                            | 0.50                            | 1.00              | 0.50                             | 1.00    | 0.50            |
| Ion-type                |       |         |     |                  |                |                                                                           | y <sup>++12</sup> -H <sub>2</sub> O | b <sub>6</sub>             | y <sup>++13</sup>           | b <sub>7</sub> -H <sub>2</sub> O | b <sup>+++15</sup> |                         | y <sup>+++14</sup> -H <sub>2</sub> O | b <sup>+++23</sup>                                       | y <sup>++14</sup> |        | y <sup>++15</sup> | y <sub>7</sub> -H <sub>2</sub> O | y <sub>7</sub> -NH <sub>3</sub> | b <sub>5</sub> -NH <sub>3</sub> | b <sup>++18</sup> | b <sub>10</sub> -NH <sub>3</sub> |         | b <sub>10</sub> |
| Delta Da                |       |         |     |                  |                |                                                                           | 0.67                                |                            | 0.26                        | -0.45                            | -0.62              |                         | -0.34                                | 0.78                                                     | 0.38              |        | 0.48              | -0.30                            | 0.29                            | 0.68                            | -0.28             | -0.49                            | 0.27    |                 |





# Peak 454

assignment

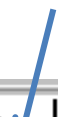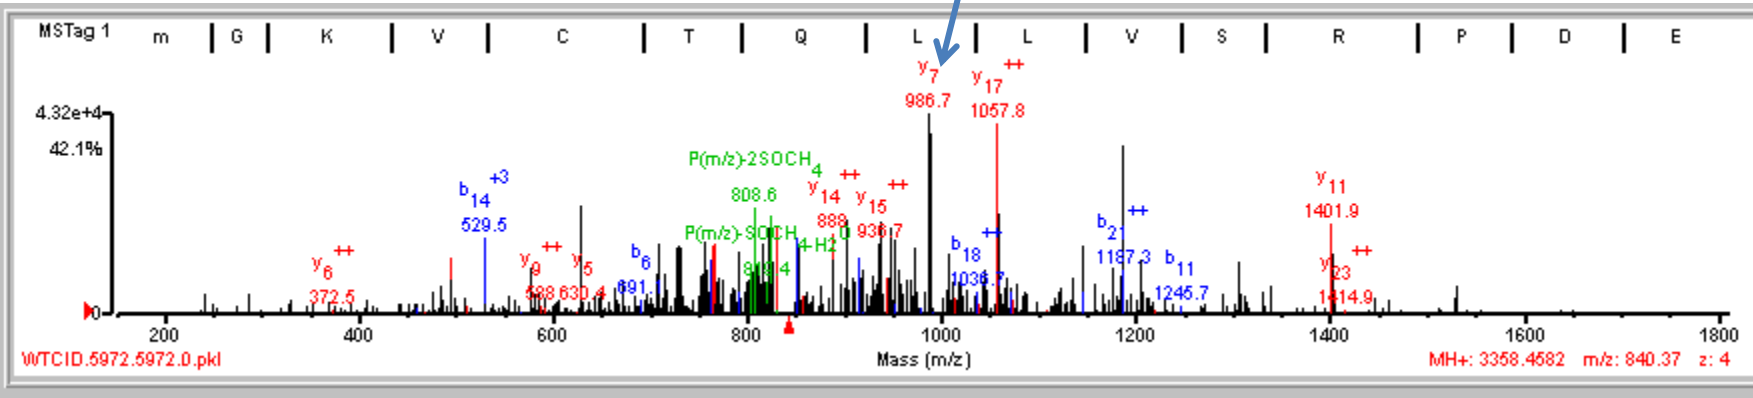

| Rank | Score | SPI (%) | BCS | # Unmatched Ions | Variable sites | Sequence                                                                      | MH* Calculated (Da) | MH* Error (Da) | MH* Error (ppm) | Protein MW/pI (Da) | Species      | Accession #              | MS-Digest Index #     | Protein Name                             |
|------|-------|---------|-----|------------------|----------------|-------------------------------------------------------------------------------|---------------------|----------------|-----------------|--------------------|--------------|--------------------------|-----------------------|------------------------------------------|
| 1    | 13.86 | 77.2    | 9   | 6/23             | M479m Y499y    | (R) V m G K V C T Q L L V / S R / P / D \ E / N I \ T \ S / Y L Q L I E K (C) | 3263.70             | 94.7568        | -358.6          | 75483.9/6.37       | Homo sapiens | <a href="#">55742695</a> | <a href="#">16495</a> | sterile alpha motif domain containing 4B |

| Fragment-ion (m/z)      | 494.00           | 628.53 | 727.58                            | 730.18             | 756.68                               | 765.50            | 790.73 | 808.57 | 816.33 | 818.38 | 822.28 | 824.16 | 851.08            | 854.25 | 888.05            | 902.68                          | 915.64            | 936.74            | 986.74         | 1057.77           | 1144.86            | 1186.08 | 1401.91         |
|-------------------------|------------------|--------|-----------------------------------|--------------------|--------------------------------------|-------------------|--------|--------|--------|--------|--------|--------|-------------------|--------|-------------------|---------------------------------|-------------------|-------------------|----------------|-------------------|--------------------|---------|-----------------|
| Frac. Inten. (% of TIC) | 2.84             | 4.10   | 3.65                              | 2.66               | 3.90                                 | 4.11              | 2.58   | 0.15   | 0.09   | 2.65   | 3.44   | 0.11   | 2.57              | 2.81   | 3.70              | 3.97                            | 2.60              | 4.48              | 25.65          | 9.28              | 2.93               | 7.19    | 4.53            |
| Rel. Inten. (% of BP)   | 11.07            | 15.98  | 14.24                             | 10.36              | 15.22                                | 16.04             | 10.07  | 0.59   | 0.33   | 10.33  | 13.43  | 0.42   | 10.01             | 10.96  | 14.42             | 15.47                           | 10.14             | 17.46             | 100.00         | 36.17             | 11.44              | 28.04   | 17.68           |
| Score                   | 1.00             | -0.16  | 0.25                              | 1.00               | 0.50                                 | 1.00              | -0.10  | 1.00   | 1.50   | -0.10  | -0.13  |        | 1.00              | -0.11  | 1.00              | 0.50                            | 1.00              | 1.00              | 1.00           | 1.00              | 1.00               | -0.28   | 1.00            |
| Ion-type                | y <sup>++7</sup> |        | b <sub>7</sub> -SOCH <sub>4</sub> | b <sup>+++19</sup> | y <sup>+++12</sup> -H <sub>2</sub> O | y <sup>++12</sup> |        | m      | sty    |        |        | m      | b <sup>++15</sup> |        | y <sup>++14</sup> | b <sub>8</sub> -NH <sub>3</sub> | b <sup>++16</sup> | y <sup>++15</sup> | y <sub>7</sub> | y <sup>++17</sup> | b <sup>+++20</sup> |         | y <sub>11</sub> |
| Delta Da                | 0.25             |        | -0.80                             | 0.81               | -0.19                                | -0.38             |        | -0.10  | 0.15   |        |        |        | 0.14              |        | 0.14              | -0.73                           | 0.17              | 0.30              | 0.24           | -0.23             | 0.79               |         | 0.21            |



# Peak 456

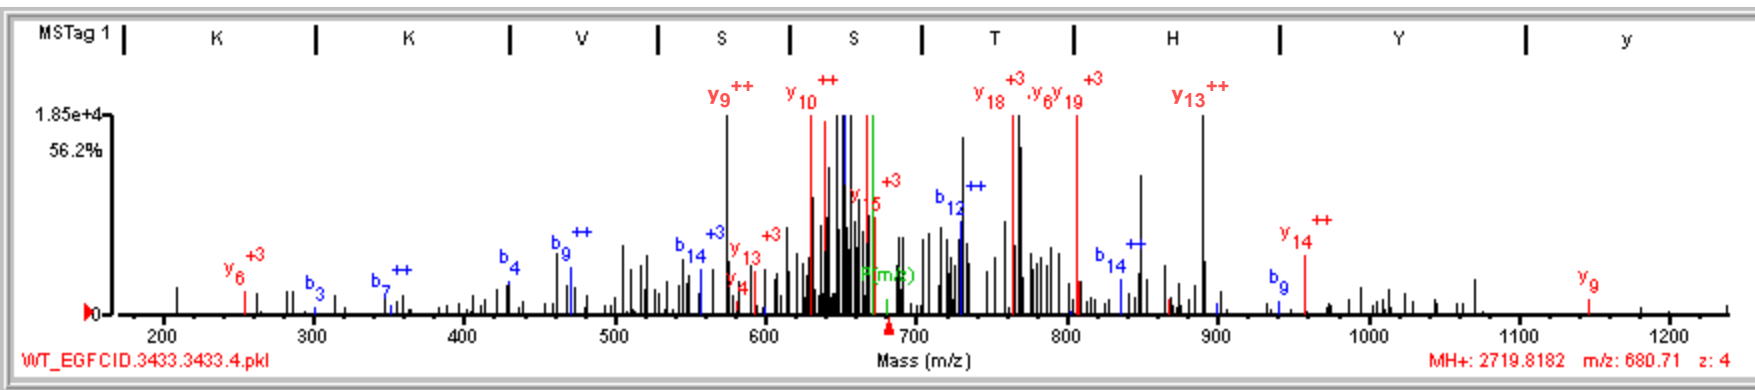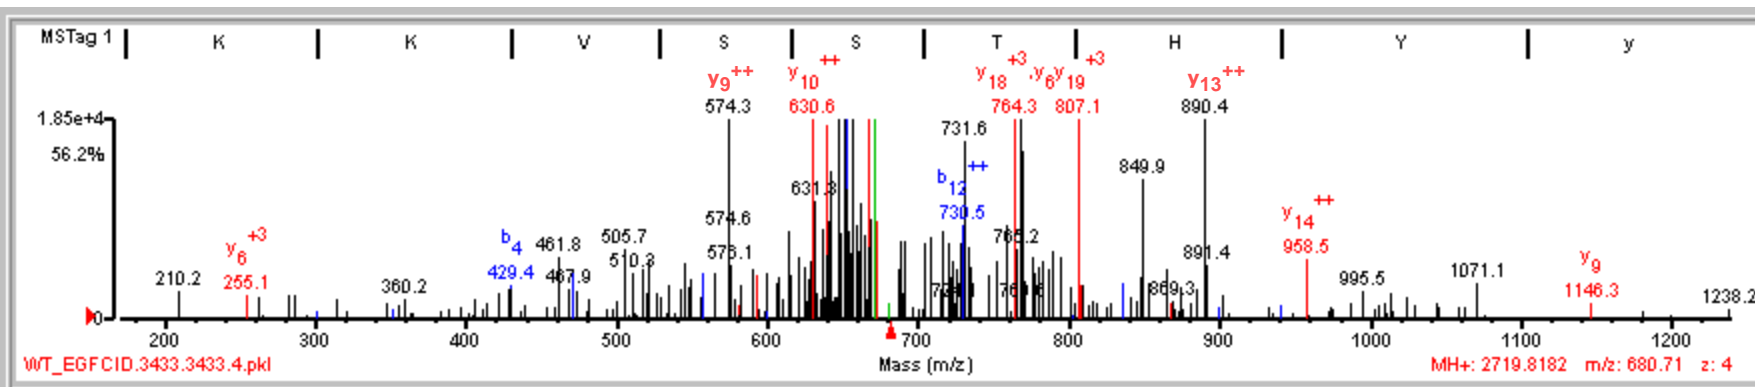

1 9.84 80.3 8 3/14 Y860y (R) D G K/K/V S S T/H/Y Y L/L/P E R I/P/S Y\L E R (Y) 2638.36 81.4558 547.6 114569.2/6.85 Homo sapiens [56549666](#) [24052](#) tyrosine kinase, non-receptor, 2 isoform 1

| Fragment-ion (m/z)     | 574.26                       | 630.56                        | 639.63                         | 641.46 | 647.48 | 651.72 | 652.45                         | 656.52 | 667.07         | 730.49                        | 764.30                         | 768.50                         | 807.10                         | 890.39                        |
|------------------------|------------------------------|-------------------------------|--------------------------------|--------|--------|--------|--------------------------------|--------|----------------|-------------------------------|--------------------------------|--------------------------------|--------------------------------|-------------------------------|
| Frac. Inten.(% of TIC) | 8.54                         | 10.08                         | 5.38                           | 6.20   | 7.99   | 5.50   | 11.89                          | 0.19   | 8.84           | 5.66                          | 6.62                           | 10.17                          | 6.25                           | 6.69                          |
| Rel. Inten.(% of BP)   | 71.85                        | 84.80                         | 45.27                          | 52.18  | 67.17  | 46.27  | 100.00                         | 1.58   | 74.38          | 47.57                         | 55.68                          | 85.55                          | 52.54                          | 56.25                         |
| Score                  | 1.00                         | 1.00                          | 1.00                           | -0.52  | -0.67  | -0.46  | 1.00                           | 1.50   | 1.00           | 1.00                          | 1.00                           | 1.00                           | 1.00                           | 1.00                          |
| Ion-type               | y <sup>++</sup> <sub>9</sub> | y <sup>++</sup> <sub>10</sub> | y <sup>+++</sup> <sub>14</sub> |        |        |        | b <sup>+++</sup> <sub>16</sub> | sty    | y <sub>5</sub> | b <sup>++</sup> <sub>12</sub> | y <sub>6</sub>                 | b <sup>+++</sup> <sub>19</sub> | y <sup>+++</sup> <sub>19</sub> | y <sup>++</sup> <sub>13</sub> |
| Delta Da               | 0.46                         | 0.22                          | 0.32                           |        |        |        | 0.13                           | 0.68   | -0.27          | 0.16                          | -0.09                          | 0.47                           | 0.37                           | 0.46                          |
|                        |                              |                               |                                |        |        |        |                                |        |                |                               | y <sup>+++</sup> <sub>18</sub> |                                |                                |                               |
|                        |                              |                               |                                |        |        |        |                                |        |                |                               | 0.27                           |                                |                                |                               |

# Peak 457

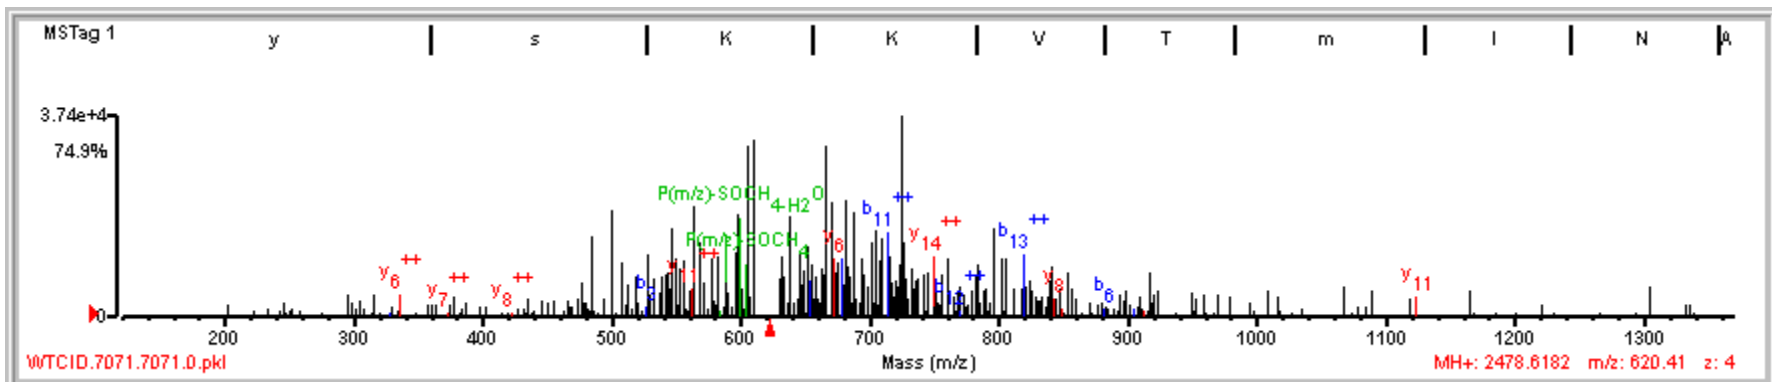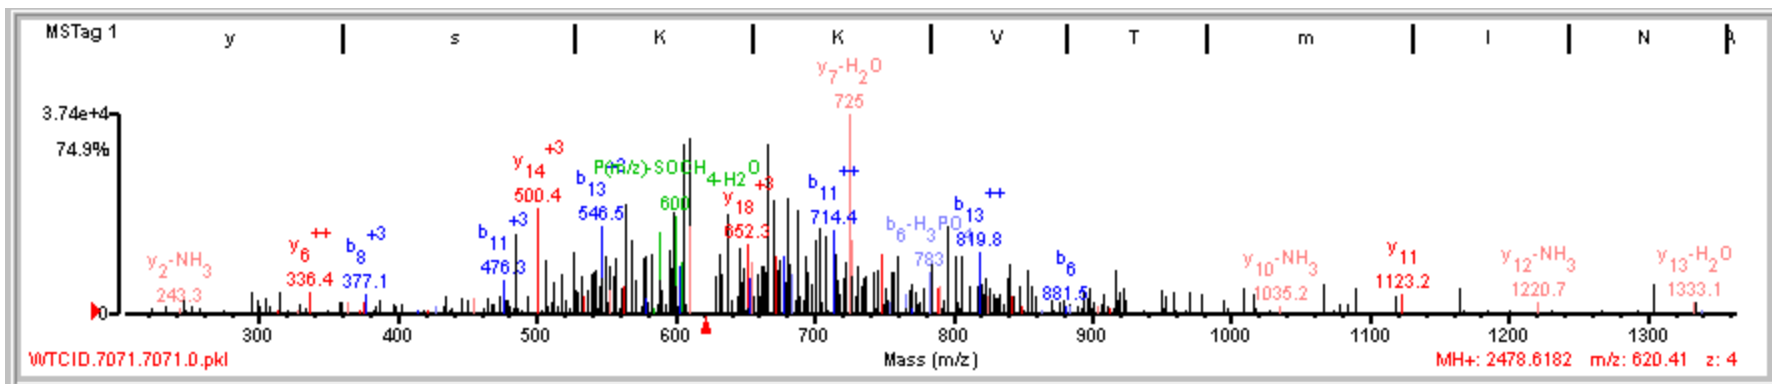

## Peptide Results

| Rank                   | Score              | SPI (%)            | BCS    | # Unmatched Ions   | # Variable sites  | Sequence                                          | MH <sup>+</sup> Calculated (Da) | MH <sup>+</sup> Error (Da) | MH <sup>+</sup> Error (ppm) | Protein MW/pl (Da) | Species            | Accession # | MS-Digest Index #  | Protein Name                                                     |                    |                |        |        |        |        |                    |                    |                                                |                |                    |
|------------------------|--------------------|--------------------|--------|--------------------|-------------------|---------------------------------------------------|---------------------------------|----------------------------|-----------------------------|--------------------|--------------------|-------------|--------------------|------------------------------------------------------------------|--------------------|----------------|--------|--------|--------|--------|--------------------|--------------------|------------------------------------------------|----------------|--------------------|
| 1                      | 12.17              | 62.2               | 8      | 9/25               | M870m Y864y S865s | (K) D y/s K K V T/m I N A I P V A S L D P I K (E) | 2303.27                         | 175.3502                   | -232.9                      | 119914.4/5.50      | Homo sapiens       | 6005757     | 30911              | chromatin-specific transcription elongation factor large subunit |                    |                |        |        |        |        |                    |                    |                                                |                |                    |
| Fragment-ion (m/z)     | 500.37             | 527.47             | 541.49 | 546.54             | 555.34            | 564.12                                            | 577.25                          | 588.23                     | 596.11                      | 600.01             | 603.61             | 606.39      | 609.80             | 654.04                                                           | 666.35             | 670.57         | 672.69 | 681.23 | 682.79 | 688.62 | 708.11             | 714.37             | 725.04                                         | 783.03         | 819.75             |
| Frac. Inten.(% of TIC) | 3.32               | 4.04               | 3.92   | 3.84               | 3.18              | 3.35                                              | 4.64                            | 0.13                       | 0.10                        | 0.12               | 3.19               | 6.51        | 5.37               | 3.30                                                             | 5.19               | 4.59           | 3.12   | 3.56   | 3.67   | 3.80   | 4.23               | 6.58               | 13.36                                          | 3.36           | 3.50               |
| Rel. Inten.(% of BP)   | 24.82              | 30.25              | 29.36  | 28.73              | 23.83             | 25.06                                             | 34.71                           | 0.96                       | 0.76                        | 0.93               | 23.89              | 48.73       | 40.20              | 24.69                                                            | 38.83              | 34.38          | 23.32  | 26.65  | 27.48  | 28.44  | 31.63              | 49.27              | 100.00                                         | 25.15          | 26.20              |
| Score                  | 1.00               | 1.00               | -0.29  | 1.00               | -0.24             | -0.25                                             | -0.35                           | 1.00                       | 1.50                        | 1.00               | 1.00               | -0.49       | 1.00               | 1.00                                                             | -0.39              | 1.00           | 1.00   | -0.27  | -0.27  | -0.28  | 1.00               | 1.00               | 0.50                                           | 1.00           | 1.00               |
| Ion-type               | y+++ <sub>14</sub> | y+++ <sub>10</sub> |        | b+++ <sub>13</sub> |                   |                                                   |                                 | m                          | sty                         | m                  | b+++ <sub>15</sub> |             | y+++ <sub>17</sub> | b <sub>4</sub>                                                   | b+++ <sub>17</sub> | y <sub>6</sub> |        |        |        |        | y+++ <sub>19</sub> | b+++ <sub>11</sub> | y <sub>7</sub> -H <sub>2</sub> O               | b <sub>5</sub> | b+++ <sub>13</sub> |
| Delta Da               | 0.42               | 0.65               |        | -0.03              |                   |                                                   |                                 | -0.33                      | 0.05                        |                    | 0.34               |             | 0.45               | -0.12                                                            | 0.59               | 0.30           |        |        |        | 0.39   | 0.08               | -0.38              | 0.78                                           | 0.39           |                    |
|                        |                    |                    |        |                    |                   |                                                   |                                 |                            |                             |                    |                    |             |                    | y <sub>6</sub> -H <sub>2</sub> O                                 |                    |                |        |        |        |        |                    |                    | b <sub>6</sub> -H <sub>3</sub> PO <sub>4</sub> |                |                    |



# Peak 458

Ions that verify assignment

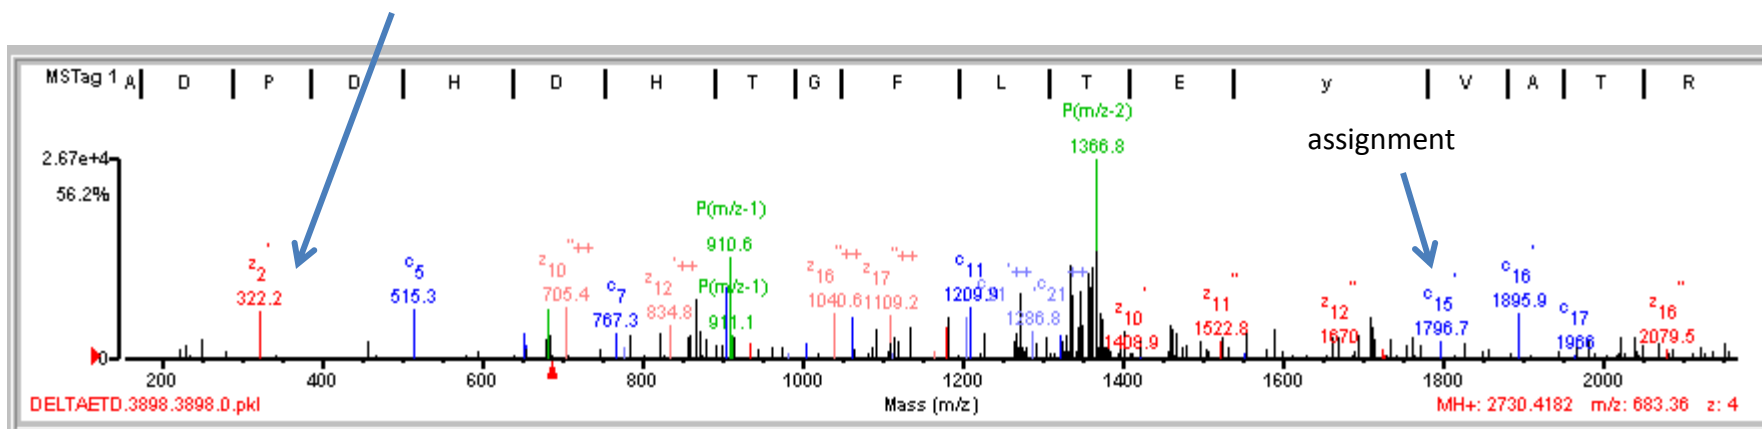

| Rank                   | Score | SPI (%)        | BCS            | # Unmatched Ions | Variable sites                 | Sequence                                       | MH <sup>+</sup> Calculated (Da) | MH <sup>+</sup> Error (Da) | MH <sup>+</sup> Error (ppm)    | Protein MW/pl (Da) | Species        | Accession #              | MS-Digest Index #             | Protein Name                       |         |                 |         |         |                 |
|------------------------|-------|----------------|----------------|------------------|--------------------------------|------------------------------------------------|---------------------------------|----------------------------|--------------------------------|--------------------|----------------|--------------------------|-------------------------------|------------------------------------|---------|-----------------|---------|---------|-----------------|
| 1                      | 6.80  | 63.1           | 8              | 6/18             | Y187y                          | (R)VADPD H D H T G\F L T/E/y V A T R W Y R (A) | 2649.25                         | 81.1701                    | 440.9                          | 41389.9/6.50       | Homo sapiens   | <a href="#">66932916</a> | <a href="#">20787</a>         | mitogen-activated protein kinase 1 |         |                 |         |         |                 |
| 1                      | 6.80  | 63.1           | 8              | 6/18             | Y187y                          | (R)VADPD H D H T G\F L T/E/y V A T R W Y R (A) | 2649.25                         | 81.1701                    | 440.9                          | 41389.9/6.50       | Homo sapiens   | <a href="#">20986531</a> | <a href="#">21374</a>         | mitogen-activated protein kinase 1 |         |                 |         |         |                 |
| Fragment-ion (m/z)     |       | 322.23         | 515.26         | 652.48           | 705.36                         | 867.12                                         | 1040.64                         | 1062.61                    | 1109.17                        | 1133.64            | 1178.87        | 1183.10                  | 1205.35                       | 1209.91                            | 1273.47 | 1322.92         | 1372.09 | 1711.12 | 1895.90         |
| Frac. Inten.(% of TIC) |       | 5.20           | 5.34           | 4.41             | 6.14                           | 6.40                                           | 4.82                            | 4.42                       | 6.61                           | 4.78               | 6.31           | 4.48                     | 4.44                          | 5.84                               | 8.29    | 4.65            | 5.01    | 7.95    | 4.92            |
| Rel. Inten.(% of BP)   |       | 62.75          | 64.42          | 53.22            | 74.08                          | 77.21                                          | 58.18                           | 53.31                      | 79.76                          | 57.72              | 76.10          | 54.01                    | 53.53                         | 70.46                              | 100.00  | 56.12           | 60.51   | 95.91   | 59.36           |
| Score                  |       | 1.00           | 1.00           | 1.00             | 1.00                           | -0.77                                          | 1.00                            | 1.00                       | 1.00                           | -0.58              | 1.00           | -0.54                    | 1.00                          | 1.00                               | -1.00   | 1.00            | -0.61   | -0.96   | 0.25            |
| Ion-type               |       | z <sub>2</sub> | c <sub>5</sub> | c <sub>6</sub>   | z <sup>+++</sup> <sub>10</sub> |                                                | z <sup>+++</sup> <sub>16</sub>  | c <sub>10</sub>            | z <sup>+++</sup> <sub>17</sub> |                    | z <sub>8</sub> |                          | c <sup>++</sup> <sub>20</sub> | c <sub>11</sub>                    |         | c <sub>12</sub> |         |         | c <sub>16</sub> |
| Delta Da               |       | 0.07           | 0.01           | 0.18             | 0.55                           |                                                | 0.67                            | 0.15                       | 0.67                           |                    | 0.34           |                          | 0.31                          | 0.38                               |         | 0.31            |         |         | 0.09            |
|                        |       |                |                |                  |                                |                                                |                                 |                            |                                |                    |                |                          |                               |                                    |         |                 |         |         | y <sub>9</sub>  |
|                        |       |                |                |                  |                                |                                                |                                 |                            |                                |                    |                |                          |                               |                                    |         | -0.67           |         |         |                 |

# Peak 459

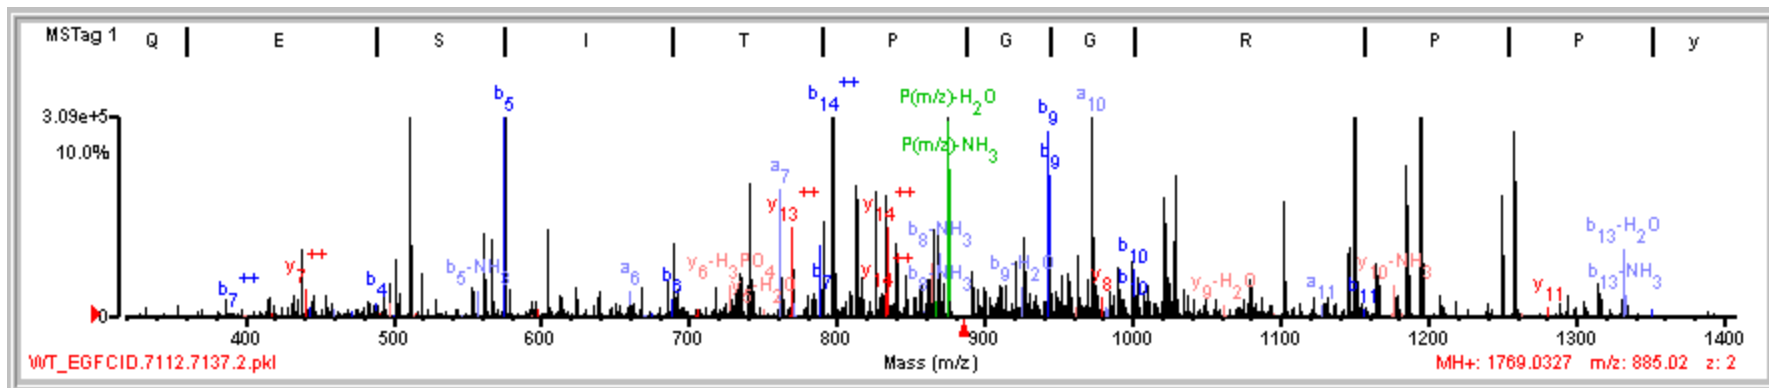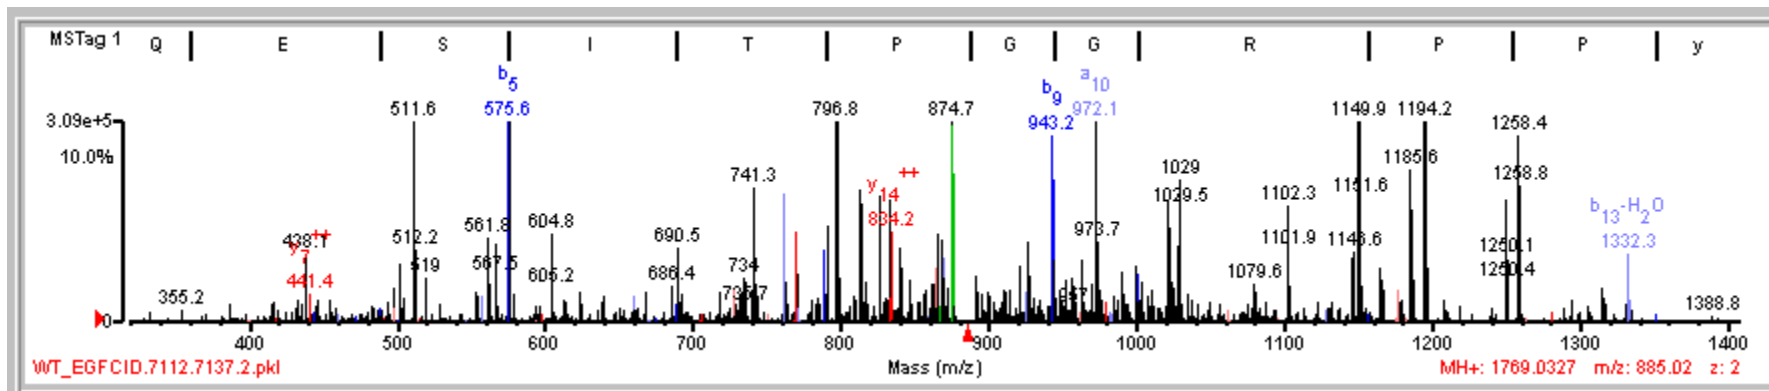

| Rank                   | Score  | SPI (%)        | BCS    | # Unmatched Ions | Variable sites                | Sequence                              | MH <sup>+</sup> Calculated (Da) | MH <sup>+</sup> Error (Da)    | MH <sup>+</sup> Error (ppm) | Protein MW/pl (Da)              | Species                       | Accession #              | MS-Digest Index #     | Protein Name                                     |         |         |         |         |         |         |         |                 |         |         |                                   |
|------------------------|--------|----------------|--------|------------------|-------------------------------|---------------------------------------|---------------------------------|-------------------------------|-----------------------------|---------------------------------|-------------------------------|--------------------------|-----------------------|--------------------------------------------------|---------|---------|---------|---------|---------|---------|---------|-----------------|---------|---------|-----------------------------------|
| 1                      | 8.49   | 72.1           | 6      | 13/25            | Y1076y                        | (K) T/E/Q E S I T P G\G\R P P y\R (S) | 1687.84                         | 81.1929                       | 693.4                       | 194610.9/8.57                   | Homo sapiens                  | <a href="#">71143119</a> | <a href="#">20810</a> | signal-induced proliferation-associated 1 like 3 |         |         |         |         |         |         |         |                 |         |         |                                   |
| Fragment-ion (m/z)     | 511.59 | 575.60         | 741.26 | 761.74           | 769.62                        | 796.80                                | 813.19                          | 833.31                        | 839.44                      | 869.27                          | 874.67                        | 943.19                   | 972.10                | 999.92                                           | 1021.87 | 1028.36 | 1029.01 | 1102.30 | 1145.69 | 1149.94 | 1185.58 | 1194.24         | 1249.39 | 1258.37 | 1332.33                           |
| Frac. Inten.(% of TIC) | 2.19   | 4.83           | 1.67   | 1.51             | 1.10                          | 15.31                                 | 2.25                            | 1.76                          | 1.49                        | 1.13                            | 2.27                          | 2.90                     | 11.60                 | 1.12                                             | 2.08    | 1.14    | 2.40    | 1.58    | 1.24    | 4.85    | 2.30    | 27.45           | 2.00    | 2.67    | 1.17                              |
| Rel. Inten.(% of BP)   | 7.97   | 17.60          | 6.10   | 5.51             | 3.99                          | 55.77                                 | 8.18                            | 6.41                          | 5.41                        | 4.12                            | 8.28                          | 10.58                    | 42.27                 | 4.06                                             | 7.59    | 4.14    | 8.76    | 5.76    | 4.52    | 17.68   | 8.39    | 100.00          | 7.28    | 9.71    | 4.28                              |
| Score                  | -0.08  | 1.00           | -0.06  | 0.25             | 1.00                          | 1.00                                  | -0.08                           | 1.00                          | -0.05                       | 0.50                            | 1.00                          | 1.00                     | 0.25                  | 1.00                                             | -0.08   | -0.04   | -0.09   | -0.06   | -0.05   | -0.18   | -0.08   | 1.00            | -0.07   | -0.10   | 0.50                              |
| Ion-type               |        | b <sub>5</sub> |        | a <sub>7</sub>   | y <sup>++</sup> <sub>13</sub> | b <sup>++</sup> <sub>14</sub>         |                                 | y <sup>++</sup> <sub>14</sub> |                             | b <sub>8</sub> -NH <sub>3</sub> | b <sup>++</sup> <sub>15</sub> | b <sub>9</sub>           | a <sub>10</sub>       | b <sub>10</sub>                                  |         |         |         |         |         |         |         | y <sub>10</sub> |         |         | b <sub>13</sub> -H <sub>2</sub> O |
| Delta Da               |        | 0.37           |        | 0.37             | 0.26                          | -0.55                                 |                                 | -0.57                         |                             | -0.12                           | -0.73                         | -0.25                    | -0.36                 | -0.54                                            |         |         |         |         |         |         |         | 0.66            |         |         | -0.32                             |

# Peak 460

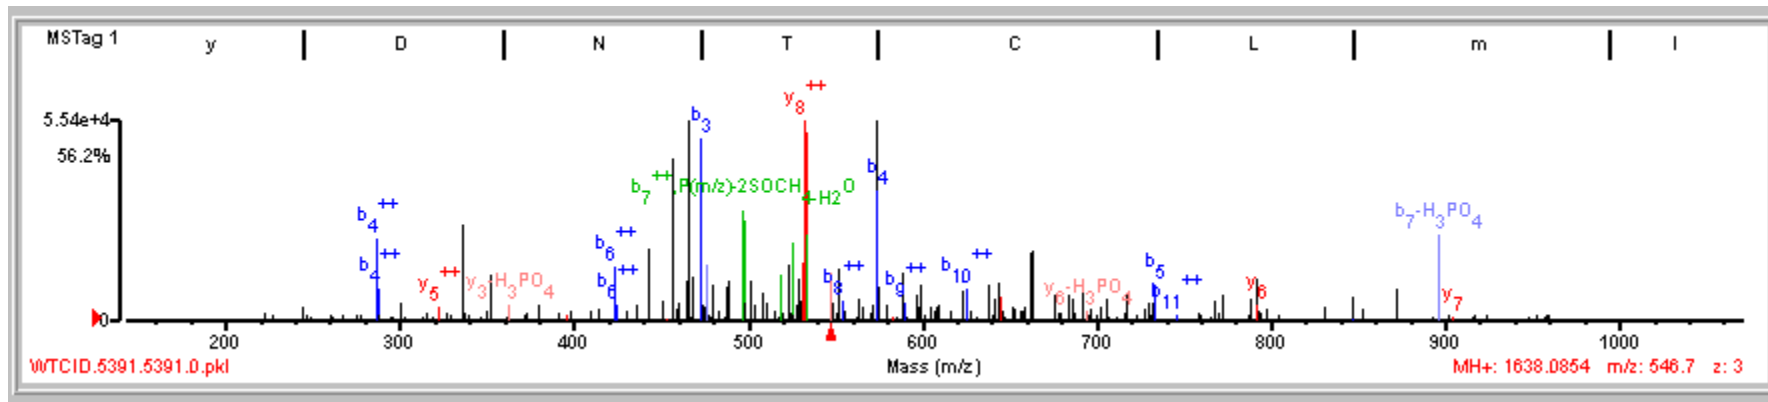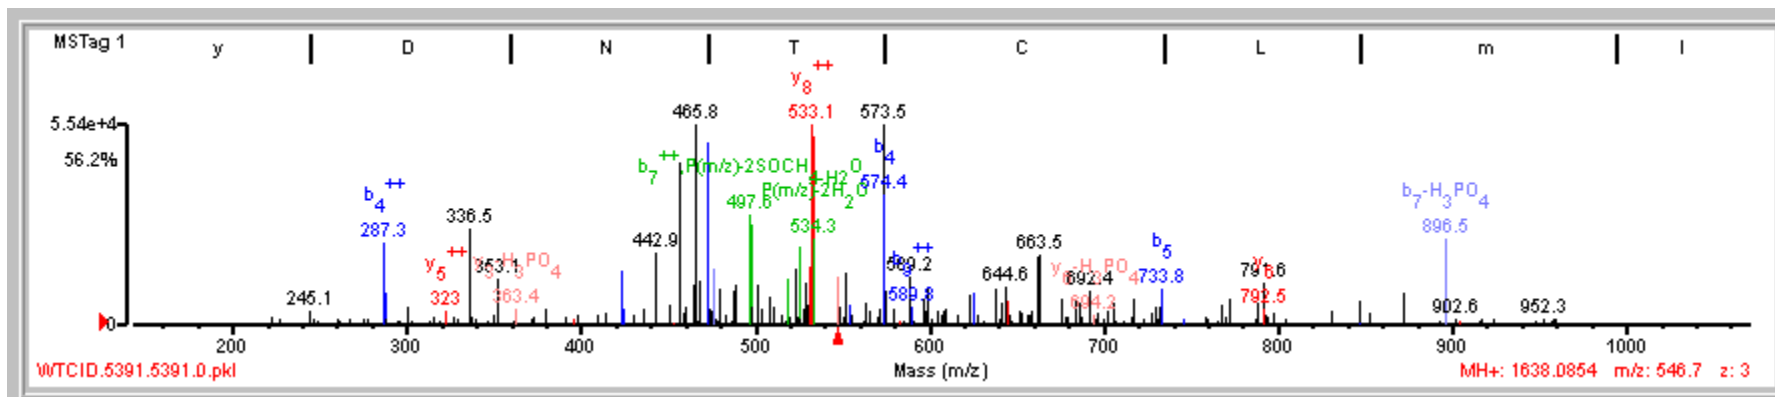

| Rank                    | Score            | SPI (%) | BCS              | # Unmatched Ions | Variable sites                               | Sequence                                | MH <sup>+</sup> Calculated (Da) | MH <sup>+</sup> Error (Da) | MH <sup>+</sup> Error (ppm)        | Protein MW/pI (Da) | Species      | Accession #             | MS-Digest Index #     | Protein Name    |                   |                |                   |                |        |                |        |
|-------------------------|------------------|---------|------------------|------------------|----------------------------------------------|-----------------------------------------|---------------------------------|----------------------------|------------------------------------|--------------------|--------------|-------------------------|-----------------------|-----------------|-------------------|----------------|-------------------|----------------|--------|----------------|--------|
| 1                       | 10.90            | 78.7    | 7                | 7/21             | M159m Y153y Y163y                            | (K) y D N T C L   m   I / A \ A y K (G) | 1462.67                         | 175.4149                   | -312.9                             | 70264.6/6.14       | Homo sapiens | <a href="#">7657265</a> | <a href="#">19323</a> | fem-1 homolog b |                   |                |                   |                |        |                |        |
| Fragment-ion (m/z)      | 287.33           | 336.51  | 423.85           | 442.92           | 456.51                                       | 465.81                                  | 473.49                          | 476.28                     | 488.06                             | 497.56             | 523.09       | 525.71                  | 529.33                | 531.88          | 533.06            | 573.46         | 589.22            | 644.58         | 662.86 | 791.59         | 896.46 |
| Frac. Inten. (% of TIC) | 4.37             | 3.80    | 2.60             | 2.57             | 5.81                                         | 8.67                                    | 7.62                            | 2.36                       | 2.68                               | 8.21               | 2.33         | 0.09                    | 2.22                  | 2.13            | 12.63             | 15.80          | 2.41              | 2.82           | 4.98   | 2.83           | 3.08   |
| Rel. Inten. (% of BP)   | 27.68            | 24.03   | 16.46            | 16.23            | 36.80                                        | 54.87                                   | 48.23                           | 14.93                      | 16.94                              | 51.96              | 14.77        | 0.60                    | 14.04                 | 13.47           | 79.92             | 100.00         | 15.28             | 17.85          | 31.49  | 17.89          | 19.47  |
| Score                   | 1.00             | -0.24   | 1.00             | -0.16            | 0.50                                         | 1.00                                    | 1.00                            | -0.15                      | 0.50                               | 1.00               | -0.15        | 0.60                    | -0.14                 | 1.00            | 1.00              | 1.00           | 1.00              | 1.00           | -0.31  | 1.00           | -0.19  |
| Ion-type                | b <sup>++4</sup> |         | b <sup>++6</sup> |                  | b <sub>3</sub> -NH <sub>3</sub> <sup>+</sup> | y <sup>+++11</sup>                      | b <sub>3</sub>                  |                            | b <sup>++7</sup> -H <sub>2</sub> O | b <sup>++7</sup>   |              | m                       |                       | y <sub>4</sub>  | y <sup>+++8</sup> | b <sub>4</sub> | b <sup>+++9</sup> | y <sub>5</sub> |        | y <sub>6</sub> |        |
| Delta Da                | -0.25            |         | -0.29            |                  | 0.43                                         | -0.05                                   | 0.38                            |                            | -0.59                              | -0.10              |              |                         |                       | -0.34           | -0.17             | -0.69          | -0.50             | -0.72          |        | -0.75          |        |

# Peak 461

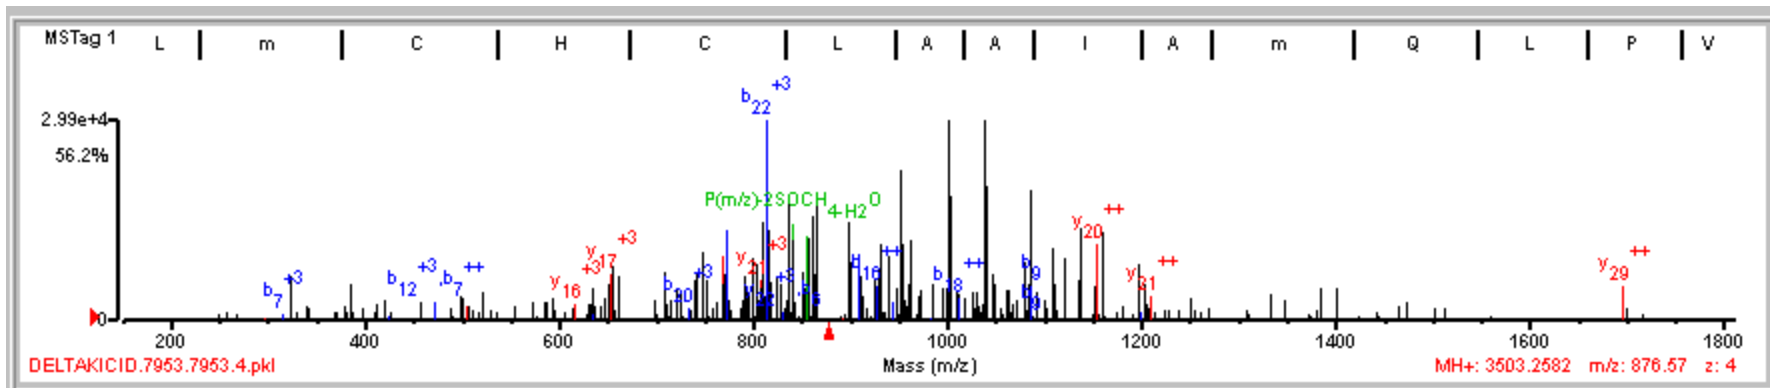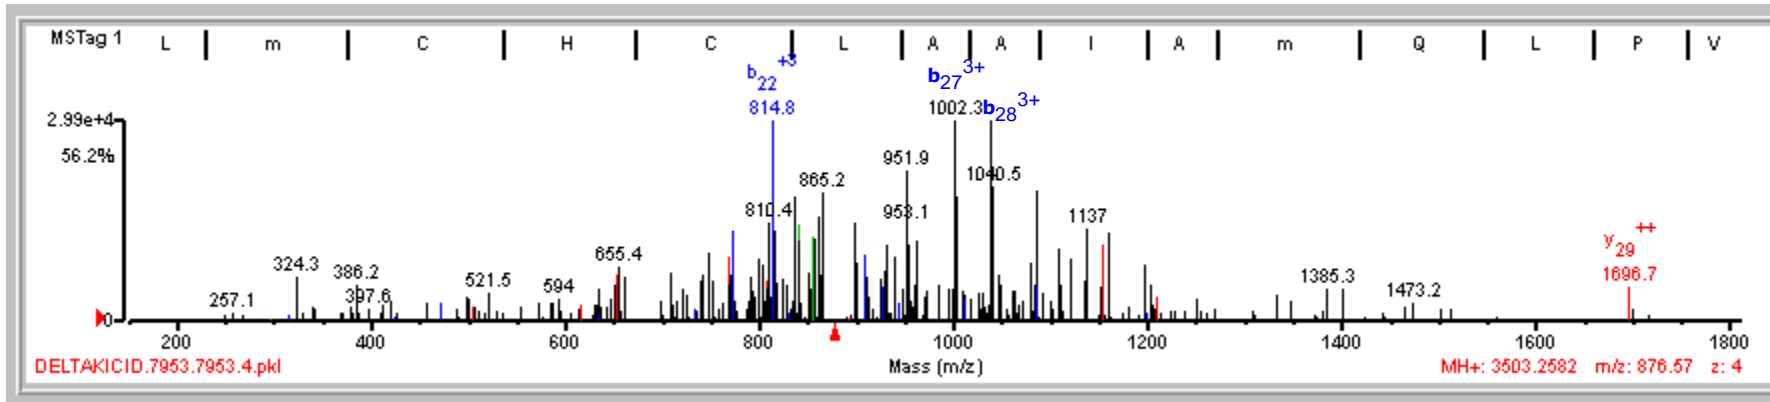

## Detailed Results

| Rank                   | Score             | SPI (%)           | BCS               | # Unmatched Ions | Variable sites          | Sequence                                                                | MH* Calculated (Da) | MH* Error (Da) | MH* Error (ppm) | Protein MW/pl (Da) | Species      | Accession #             | MS-Digest Index #     | Protein Name                 |                    |                                   |                    |                    |                                 |                |         |                                 |
|------------------------|-------------------|-------------------|-------------------|------------------|-------------------------|-------------------------------------------------------------------------|---------------------|----------------|-----------------|--------------------|--------------|-------------------------|-----------------------|------------------------------|--------------------|-----------------------------------|--------------------|--------------------|---------------------------------|----------------|---------|---------------------------------|
| 1                      | 10.65             | 76.9              | 8                 | 6/22             | M449m M458m M472m Y475y | (R) I L m C H C L A A I A m Q L P V L / G D G / M L G D L m E L Y K (V) | 3376.67             | 126.5913       | -388.1          | 106834.5/8.30      | Homo sapiens | <a href="#">7661566</a> | <a href="#">14177</a> | integrator complex subunit 7 |                    |                                   |                    |                    |                                 |                |         |                                 |
| Fragment-ion (m/z)     | 653.99            | 769.33            | 773.69            | 803.36           | 807.46                  | 810.36                                                                  | 814.80              | 835.93         | 840.48          | 852.29             | 855.91       | 861.58                  | 865.19                | 899.30                       | 927.82             | 951.94                            | 1002.32            | 1039.74            | 1046.64                         | 1085.79        | 1136.95 | 1161.08                         |
| Frac. Inten.(% of TIC) | 2.96              | 2.97              | 3.71              | 3.24             | 2.64                    | 3.25                                                                    | 9.41                | 3.63           | 0.17            | 0.09               | 0.16         | 3.51                    | 3.73                  | 5.03                         | 2.52               | 11.83                             | 14.42              | 11.14              | 3.54                            | 5.17           | 3.97    | 2.91                            |
| Rel. Inten.(% of BP)   | 20.53             | 20.58             | 25.71             | 22.49            | 18.32                   | 22.55                                                                   | 65.24               | 25.18          | 1.19            | 0.60               | 1.11         | 24.31                   | 25.88                 | 34.89                        | 17.46              | 82.01                             | 100.00             | 77.26              | 24.55                           | 35.84          | 27.54   | 20.16                           |
| Score                  | 1.00              | 1.00              | 1.00              | 0.25             | 1.00                    | -0.23                                                                   | 1.00                | -0.25          | 0.25            | 1.50               | 0.25         | 0.24                    | -0.26                 | -0.35                        | 1.00               | 0.25                              | 1.00               | 1.00               | 0.50                            | 1.00           | -0.28   | 0.50                            |
| Ion-type               | y <sup>++10</sup> | y <sup>++13</sup> | b <sup>++13</sup> | a <sub>9</sub>   | y <sup>+++21</sup>      |                                                                         | b <sup>+++22</sup>  |                | m               | sty                | m            |                         |                       |                              | b <sup>+++27</sup> | b <sub>9</sub> -SOCH <sub>4</sub> | b <sup>+++28</sup> | b <sup>+++28</sup> | y <sub>9</sub> -NH <sub>3</sub> | b <sub>9</sub> |         | y <sub>9</sub> -NH <sub>3</sub> |
| Delta Da               | -0.79             | 0.01              | 0.33              | 0.02             | 0.41                    |                                                                         | 0.40                |                | 0.07            | -0.13              |              |                         |                       |                              | -0.14              | 0.49                              | 0.85               | 0.57               | -0.77                           | -0.70          |         | 0.59                            |



# Peak 463

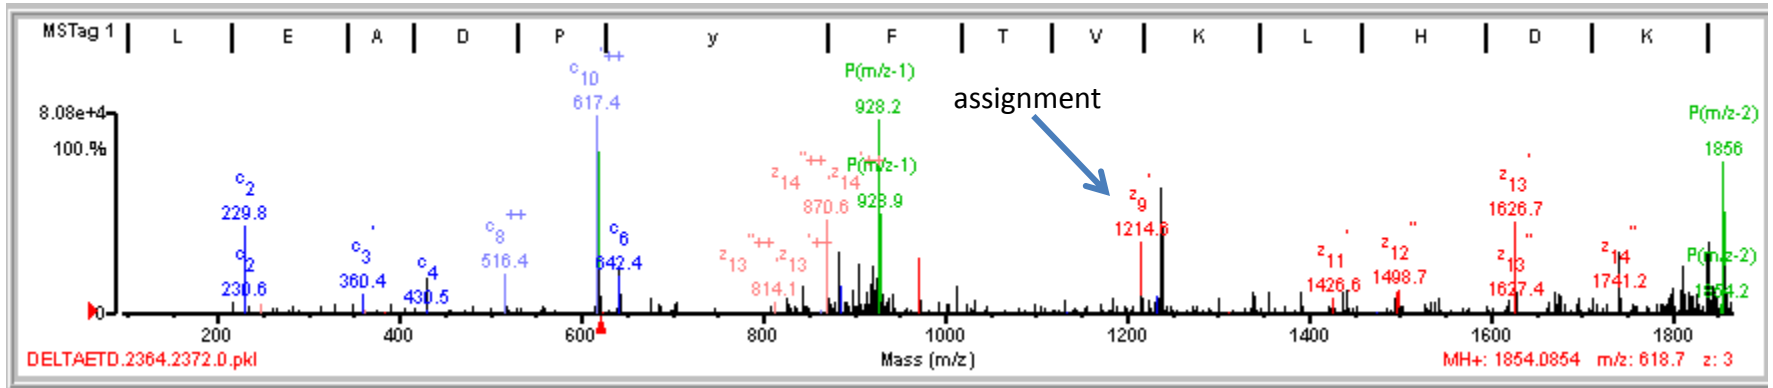

| Rank                   | Score          | SPI (%)        | BCS    | # Unmatched Ions | Variable sites | Sequence                              | MH <sup>+</sup> Calculated (Da) | MH <sup>+</sup> Error (Da) | MH <sup>+</sup> Error (ppm) | Protein MW/pI (Da) | Species                     | Accession #                  | MS-Digest Index #    | Protein Name          |                              |         |                 |                              |                               |                               |                              |                               |         |                              |         |
|------------------------|----------------|----------------|--------|------------------|----------------|---------------------------------------|---------------------------------|----------------------------|-----------------------------|--------------------|-----------------------------|------------------------------|----------------------|-----------------------|------------------------------|---------|-----------------|------------------------------|-------------------------------|-------------------------------|------------------------------|-------------------------------|---------|------------------------------|---------|
| 1                      | 7.27           | 54.8           | 7      | 11/25            | Y5167y         | (K) V L E A D P Y F T V K L H D K (T) | 1774.94                         | 79.1480                    | -441.3                      | 2993027.6/6.35     | Homo sapiens                | <a href="#">110349715</a>    | <a href="#">6641</a> | titin isoform N2-B    |                              |         |                 |                              |                               |                               |                              |                               |         |                              |         |
| 1                      | 7.27           | 54.8           | 7      | 11/25            | Y5292y         | (K) V L E A D P Y F T V K L H D K (T) | 1774.94                         | 79.1480                    | -441.3                      | 3006843.3/6.36     | Homo sapiens                | <a href="#">110349713</a>    | <a href="#">6945</a> | titin isoform novex-1 |                              |         |                 |                              |                               |                               |                              |                               |         |                              |         |
| 1                      | 7.27           | 54.8           | 7      | 11/25            | Y5359y         | (K) V L E A D P Y F T V K L H D K (T) | 1774.94                         | 79.1480                    | -441.3                      | 3014045.9/6.31     | Homo sapiens                | <a href="#">110349717</a>    | <a href="#">7361</a> | titin isoform novex-2 |                              |         |                 |                              |                               |                               |                              |                               |         |                              |         |
| 1                      | 7.27           | 54.8           | 7      | 11/25            | Y11664y        | (K) V L E A D P Y F T V K L H D K (T) | 1774.94                         | 79.1480                    | -441.3                      | 3713692.0/6.16     | Homo sapiens                | <a href="#">110349719</a>    | <a href="#">7772</a> | titin isoform N2-A    |                              |         |                 |                              |                               |                               |                              |                               |         |                              |         |
| Fragment-ion (m/z)     | 229.77         | 359.21         | 429.32 | 515.16           | 641.22         | 844.25                                | 870.56                          | 884.37                     | 971.47                      | 1012.52            | 1214.58                     | 1233.48                      | 1238.62              | 1340.64               | 1426.59                      | 1438.64 | 1443.00         | 1497.44                      | 1498.71                       | 1626.39                       | 1626.70                      | 1628.44                       | 1675.65 | 1740.32                      | 1742.09 |
| Frac. Inten.(% of TIC) | 5.45           | 1.75           | 1.94   | 3.53             | 7.27           | 2.96                                  | 6.65                            | 5.17                       | 7.50                        | 3.23               | 7.91                        | 2.58                         | 12.12                | 2.22                  | 2.59                         | 1.69    | 1.67            | 2.43                         | 2.53                          | 1.60                          | 6.02                         | 2.06                          | 3.06    | 4.01                         | 2.04    |
| Rel. Inten.(% of BP)   | 44.95          | 14.44          | 15.98  | 29.08            | 59.99          | 24.40                                 | 54.85                           | 42.64                      | 61.90                       | 26.68              | 65.26                       | 21.27                        | 100.00               | 18.32                 | 21.34                        | 13.93   | 13.75           | 20.07                        | 20.90                         | 13.19                         | 49.64                        | 17.01                         | 25.22   | 33.10                        | 16.84   |
| Score                  | 1.00           | 1.00           | -0.16  | -0.29            | -0.60          | -0.24                                 | 1.00                            | -0.43                      | 1.00                        | -0.27              | 1.00                        | 0.25                         | -1.00                | -0.18                 | 1.00                         | -0.14   | 0.25            | 1.00                         | 0.25                          | 1.00                          | 1.00                         | 0.25                          | -0.25   | 1.00                         | -0.17   |
| Ion-type               | c <sub>2</sub> | c <sub>3</sub> |        |                  |                |                                       | z <sup>++</sup> <sub>14</sub>   |                            | z <sup>+</sup> <sub>8</sub> |                    | z <sup>+</sup> <sub>9</sub> | c <sup>+</sup> <sub>10</sub> |                      |                       | z <sup>+</sup> <sub>11</sub> |         | y <sub>11</sub> | z <sup>+</sup> <sub>12</sub> | z <sup>++</sup> <sub>12</sub> | z <sup>++</sup> <sub>13</sub> | z <sup>+</sup> <sub>13</sub> | z <sup>++</sup> <sub>13</sub> |         | z <sup>+</sup> <sub>14</sub> |         |
| Delta Da               | -0.42          | -0.02          |        |                  |                |                                       | 0.15                            |                            | -0.07                       |                    | 0.01                        | -0.09                        |                      |                       | -0.06                        |         | 0.33            | -0.25                        | 0.01                          | -0.34                         | -0.03                        | 0.70                          |         | 0.50                         |         |







# Peak 467

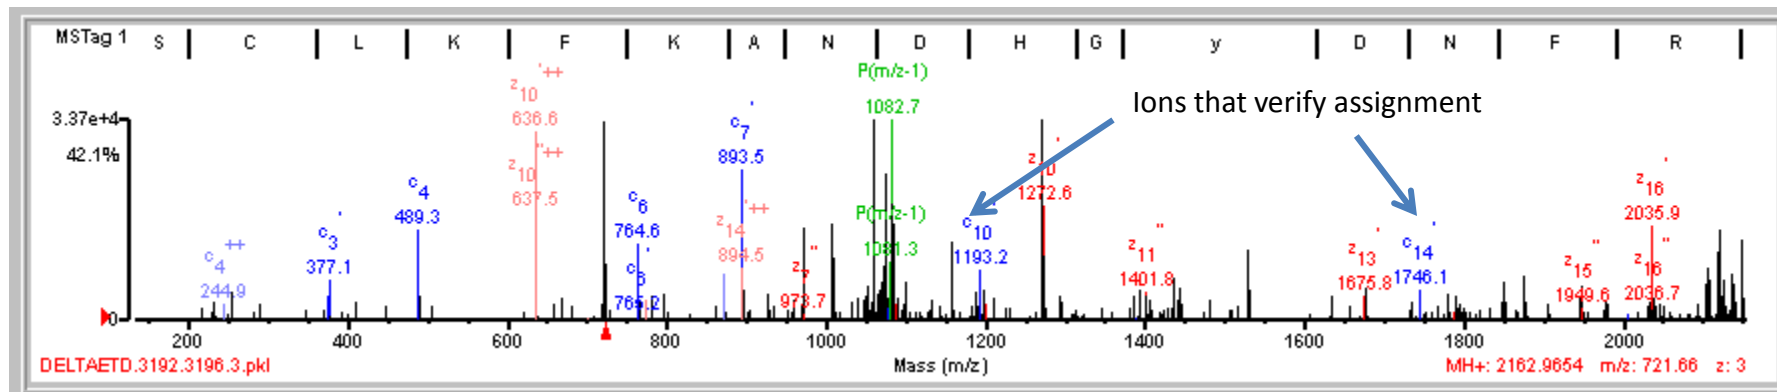

| Rank                    | Score          | SPI (%)        | BCS                           | # Unmatched Ions | Variable sites                | Sequence                                  | MH <sup>+</sup> Calculated (Da) | MH <sup>+</sup> Error (Da) | MH <sup>+</sup> Error (ppm) | Protein MW/pI (Da) | Species         | Accession #             | MS-Digest Index #     | Protein Name                         |                 |                 |                 |                 |                 |                 |                 |
|-------------------------|----------------|----------------|-------------------------------|------------------|-------------------------------|-------------------------------------------|---------------------------------|----------------------------|-----------------------------|--------------------|-----------------|-------------------------|-----------------------|--------------------------------------|-----------------|-----------------|-----------------|-----------------|-----------------|-----------------|-----------------|
| 1                       | 10.74          | 69.2           | 9                             | 7/21             | Q418q Y430y                   | (K) q/s/C/L/K F/K/A/N/D/H/G/y D/N/F/R (S) | 2099.97                         | 62.9939                    | 25.0                        | 49644.2/9.15       | Homo sapiens    | <a href="#">4557547</a> | <a href="#">35814</a> | endothelin receptor type B isoform 1 |                 |                 |                 |                 |                 |                 |                 |
| Fragment-ion (m/z)      | 376.15         | 489.34         | 636.61                        | 764.55           | 872.55                        | 893.54                                    | 971.72                          | 1007.75                    | 1088.08                     | 1157.77            | 1193.15         | 1271.89                 | 1401.79               | 1444.92                              | 1529.13         | 1529.97         | 1675.82         | 1849.92         | 1876.92         | 1948.34         | 2035.93         |
| Frac. Inten. (% of TIC) | 2.51           | 4.45           | 10.78                         | 2.93             | 1.85                          | 9.35                                      | 3.86                            | 7.97                       | 1.90                        | 6.81               | 3.17            | 17.52                   | 2.08                  | 2.21                                 | 3.69            | 5.26            | 1.72            | 1.96            | 2.89            | 2.17            | 4.92            |
| Rel. Inten. (% of BP)   | 14.31          | 25.39          | 61.54                         | 16.72            | 10.56                         | 53.36                                     | 22.01                           | 45.51                      | 10.82                       | 38.90              | 18.11           | 100.00                  | 11.88                 | 12.60                                | 21.09           | 30.02           | 9.82            | 11.19           | 16.51           | 12.40           | 28.06           |
| Score                   | 1.00           | 1.00           | 1.00                          | 1.00             | 1.00                          | 1.00                                      | 1.00                            | -0.46                      | 1.00                        | -0.39              | 1.00            | 1.00                    | 0.25                  | -0.13                                | -0.21           | -0.30           | 1.00            | -0.11           | -0.17           | 1.00            | 1.00            |
| Ion-type                | c <sub>3</sub> | c <sub>4</sub> | z <sup>++</sup> <sub>10</sub> | c <sub>6</sub>   | c <sup>++</sup> <sub>14</sub> | c <sub>7</sub>                            | z <sub>7</sub>                  | z <sub>8</sub>             | z <sub>8</sub>              | z <sub>8</sub>     | c <sub>10</sub> | z <sub>10</sub>         | z <sub>11</sub>       | z <sub>11</sub>                      | z <sub>11</sub> | z <sub>11</sub> | z <sub>13</sub> | z <sub>13</sub> | z <sub>13</sub> | z <sub>15</sub> | z <sub>16</sub> |
| Delta Da                | 0.02           | 0.13           | -0.12                         | 0.17             | -0.31                         | 0.06                                      | -0.63                           |                            | 0.70                        |                    | 0.57            | -0.57                   | 0.23                  |                                      |                 |                 | 0.11            |                 |                 | -0.49           | 0.07            |

# Peak 469

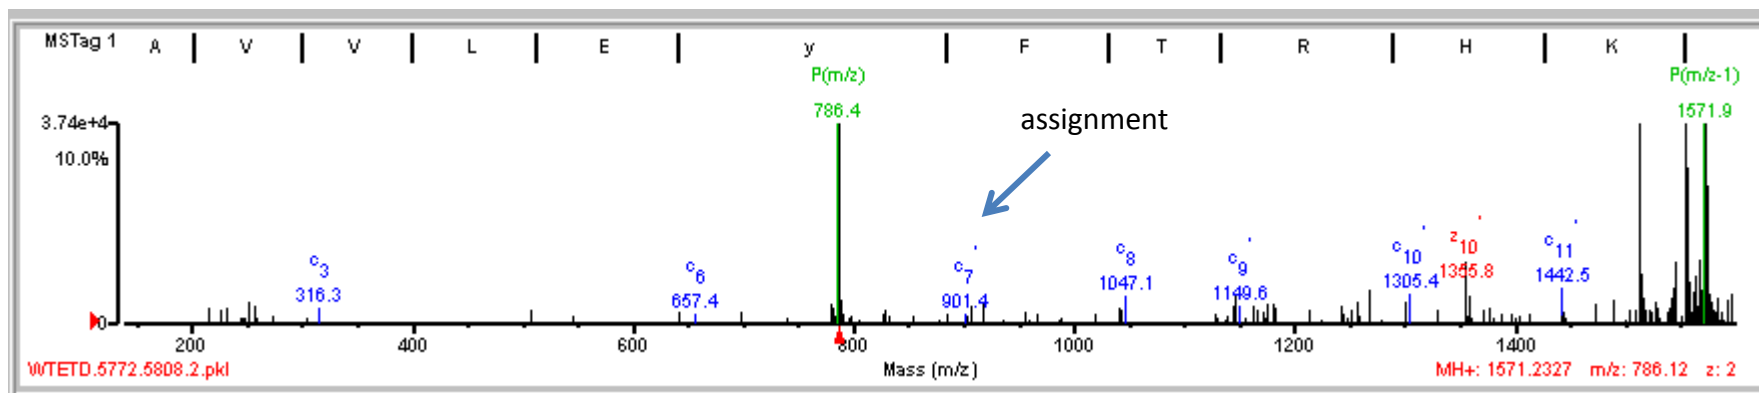

| Rank                    | Score          | SPI (%) | BCS            | # Unmatched Ions | Variable sites | Sequence                        | MH <sup>+</sup> Calculated (Da) | MH <sup>+</sup> Error (Da) | MH <sup>+</sup> Error (ppm) | Protein MW/pi (Da) | Species        | Accession #             | MS-Digest Index #     | Protein Name                                                  |         |                 |                 |         |                 |         |         |
|-------------------------|----------------|---------|----------------|------------------|----------------|---------------------------------|---------------------------------|----------------------------|-----------------------------|--------------------|----------------|-------------------------|-----------------------|---------------------------------------------------------------|---------|-----------------|-----------------|---------|-----------------|---------|---------|
| 1                       | 6.72           | 59.1    | 8              | 11/21            | Y60y           | (R) K/A V/V/L E\Y F\T\R\H\K (R) | 1490.85                         | 80.3849                    | 266.4                       | 25424.9/10.08      | Homo sapiens   | <a href="#">5729986</a> | <a href="#">30232</a> | POP4 (processing of precursor, <i>S. cerevisiae</i> ) homolog |         |                 |                 |         |                 |         |         |
| Fragment-ion (m/z)      | 215.64         | 252.06  | 656.63         | 789.57           | 827.25         | 906.91                          | 1040.74                         | 1047.13                    | 1144.90                     | 1147.23            | 1173.05        | 1181.90                 | 1258.08               | 1267.84                                                       | 1301.57 | 1305.45         | 1355.04         | 1358.37 | 1442.12         | 1442.52 | 1490.19 |
| Frac. Inten. (% of TIC) | 2.93           | 2.98    | 2.75           | 5.44             | 3.21           | 3.10                            | 3.46                            | 3.94                       | 3.13                        | 3.81               | 3.25           | 4.70                    | 3.58                  | 4.39                                                          | 2.85    | 3.88            | 23.00           | 4.58    | 3.07            | 8.93    | 3.05    |
| Rel. Inten. (% of BP)   | 12.73          | 12.95   | 11.94          | 23.63            | 13.95          | 13.46                           | 15.05                           | 17.11                      | 13.59                       | 16.55              | 14.14          | 20.44                   | 15.55                 | 19.08                                                         | 12.39   | 16.85           | 100.00          | 19.91   | 13.34           | 38.81   | 13.26   |
| Score                   | 1.00           | -0.13   | 1.00           | -0.24            | -0.14          | -0.13                           | -0.15                           | 1.00                       | -0.14                       | 1.00               | 0.25           | -0.20                   | 0.25                  | -0.19                                                         | -0.12   | 1.00            | 1.00            | -0.20   | 1.00            | 1.00    | -0.13   |
| Ion-type                | c <sub>2</sub> |         | c <sub>6</sub> |                  |                |                                 |                                 | c <sub>8</sub>             |                             | c <sub>9</sub>     | y <sub>8</sub> |                         | z <sub>9</sub>        |                                                               |         | c <sub>10</sub> | z <sub>10</sub> |         | c <sub>11</sub> |         |         |
| Delta Da                | -0.52          |         | -0.80          |                  |                |                                 |                                 | -0.40                      |                             | -0.34              | -0.50          |                         | 0.48                  |                                                               |         | 0.77            | -0.62           |         | 0.38            | 0.78    |         |
|                         |                |         |                |                  |                |                                 |                                 |                            |                             |                    |                |                         |                       |                                                               |         |                 |                 |         | -0.60           | -0.20   |         |



# Peak 473

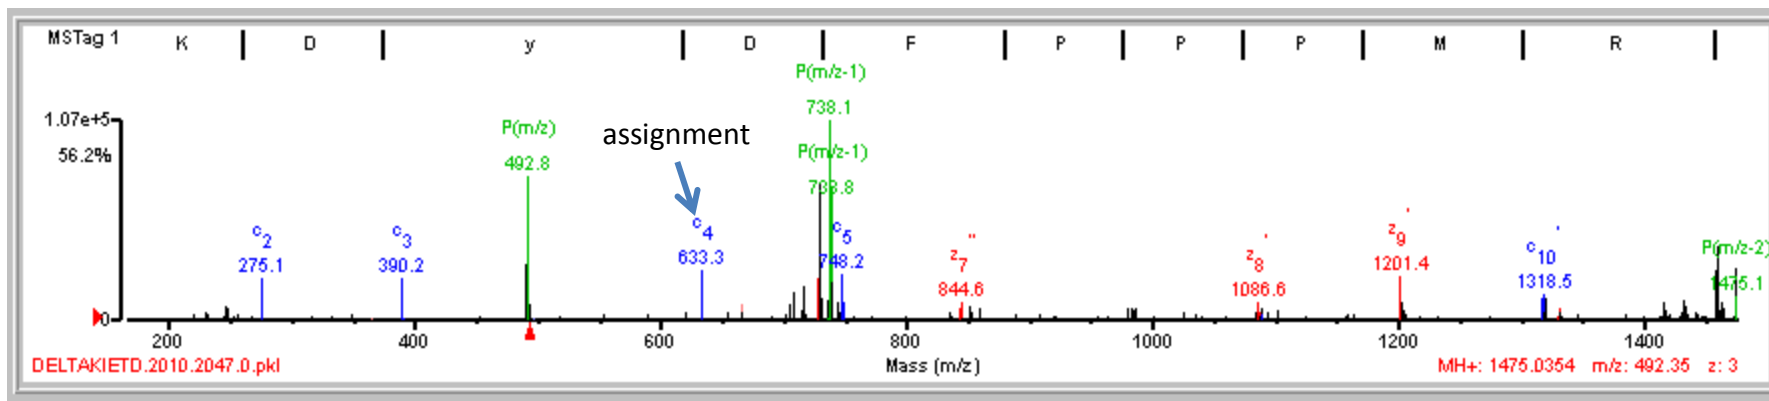

| Rank                    | Score | SPI (%)        | BCS            | # Unmatched Ions | Variable sites   | Sequence                      | MH <sup>+</sup> Calculated (Da) | MH <sup>+</sup> Error (Da) | MH <sup>+</sup> Error (ppm) | Protein MW/pl (Da) | Species         | Accession #             | MS-Digest Index #    | Protein Name                                                                |         |
|-------------------------|-------|----------------|----------------|------------------|------------------|-------------------------------|---------------------------------|----------------------------|-----------------------------|--------------------|-----------------|-------------------------|----------------------|-----------------------------------------------------------------------------|---------|
| 1                       | 8.76  | 88.6           | 6              | 2/14             | Y241y            | (R) E/K D Y D F P P P M\R (Q) | 1394.64                         | 80.3945                    | 290.3                       | 92861.3/6.23       | Homo sapiens    | <a href="#">5453680</a> | <a href="#">8768</a> | neural precursor cell expressed, developmentally down-regulated 9 isoform 1 |         |
| Fragment-ion (m/z)      |       | 245.69         | 275.08         | 390.17           | 633.27           | 665.38                        | 744.52                          | 748.19                     | 843.41                      | 1086.59            | 1201.36         | 1203.17                 | 1317.53              | 1318.54                                                                     | 1330.88 |
| Frac. Inten. (% of TIC) |       | 5.11           | 7.54           | 7.17             | 11.47            | 6.55                          | 4.48                            | 9.95                       | 7.30                        | 5.04               | 9.54            | 6.27                    | 5.12                 | 8.97                                                                        | 5.49    |
| Rel. Inten. (% of BP)   |       | 44.51          | 65.75          | 62.54            | 100.00           | 57.07                         | 39.06                           | 86.74                      | 63.67                       | 43.89              | 83.14           | 54.62                   | 44.61                | 78.17                                                                       | 47.83   |
| Score                   |       | -0.45          | 1.00           | 1.00             | 1.00             | 1.00                          | 0.25                            | 1.00                       | 1.00                        | 1.00               | 1.00            | -0.55                   | 1.00                 | 0.25                                                                        | 0.25    |
| Ion-type                |       | c <sub>2</sub> | c <sub>3</sub> | c <sub>4</sub>   | z' <sub>10</sub> | y <sub>6</sub>                | c <sub>5</sub>                  | z' <sub>7</sub>            | z' <sub>8</sub>             | z' <sub>9</sub>    | c <sub>10</sub> | c' <sub>10</sub>        | z'' <sub>10</sub>    |                                                                             |         |
| Delta Da                |       | -0.09          | -0.03          | 0.04             | 0.10             | 0.13                          | -0.06                           | 0.02                       | 0.17                        | -0.09              | 0.01            | 0.01                    | 0.33                 |                                                                             |         |

# Peak 474

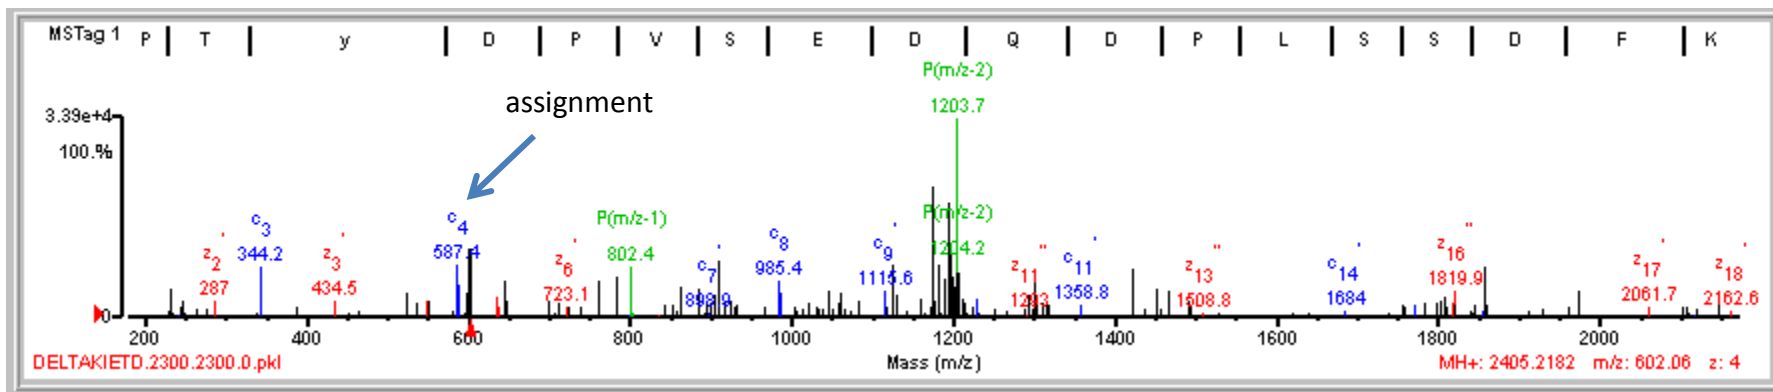

| Rank                    | Score                       | SPI (%)        | BCS            | # Unmatched Ions            | Variable sites               | Sequence                                                                         | MH <sup>+</sup> Calculated (Da) | MH <sup>+</sup> Error (Da) | MH <sup>+</sup> Error (ppm)   | Protein MW/pi (Da) | Species                       | Accession #              | MS-Digest Index #             | Protein Name                               |         |                 |         |         |         |         |         |                              |
|-------------------------|-----------------------------|----------------|----------------|-----------------------------|------------------------------|----------------------------------------------------------------------------------|---------------------------------|----------------------------|-------------------------------|--------------------|-------------------------------|--------------------------|-------------------------------|--------------------------------------------|---------|-----------------|---------|---------|---------|---------|---------|------------------------------|
| 1                       | 6.80                        | 65.6           | 9              | 8/22                        | Y518y                        | (K) K P T <u>Y</u> I D P V / S <u>E</u> I \ D \ Q D P L S I S D F I <u>R</u> (L) | 2324.10                         | 81.1141                    | 477.2                         | 114569.2/6.85      | Homo sapiens                  | <a href="#">56549666</a> | <a href="#">24052</a>         | tyrosine kinase, non-receptor, 2 isoform 1 |         |                 |         |         |         |         |         |                              |
| Fragment-ion (m/z)      | 286.99                      | 344.24         | 587.37         | 636.54                      | 646.20                       | 762.64                                                                           | 862.52                          | 885.92                     | 910.11                        | 985.38             | 1060.04                       | 1114.72                  | 1124.60                       | 1181.50                                    | 1212.74 | 1229.71         | 1293.71 | 1300.83 | 1422.28 | 1451.70 | 1819.90 | 1858.44                      |
| Frac. Inten. (% of TIC) | 2.71                        | 4.81           | 8.19           | 3.10                        | 5.09                         | 4.78                                                                             | 2.99                            | 2.80                       | 6.14                          | 6.33               | 3.91                          | 4.57                     | 5.42                          | 4.99                                       | 3.17    | 3.09            | 3.68    | 4.68    | 5.60    | 2.76    | 4.63    | 6.54                         |
| Rel. Inten. (% of BP)   | 33.03                       | 58.75          | 100.00         | 37.81                       | 62.14                        | 58.38                                                                            | 36.54                           | 34.23                      | 74.93                         | 77.29              | 47.72                         | 55.84                    | 66.20                         | 60.85                                      | 38.75   | 37.69           | 44.93   | 57.13   | 68.40   | 33.73   | 56.46   | 79.86                        |
| Score                   | 1.00                        | 1.00           | 1.00           | 1.00                        | 1.00                         | 0.25                                                                             | -0.37                           | 0.25                       | 1.00                          | 1.00               | 1.00                          | 1.00                     | 0.25                          | -0.61                                      | -0.39   | 1.00            | -0.45   | -0.57   | -0.68   | -0.34   | 0.25    | -0.80                        |
| Ion-type                | z <sub>2</sub> <sup>+</sup> | c <sub>3</sub> | c <sub>4</sub> | z <sub>5</sub> <sup>+</sup> | z <sub>5</sub> <sup>++</sup> | y <sub>11</sub> <sup>++</sup>                                                    |                                 |                            | z <sub>16</sub> <sup>++</sup> | c <sub>8</sub>     | c <sub>18</sub> <sup>++</sup> | c <sub>9</sub>           | c <sub>19</sub> <sup>++</sup> |                                            |         | c <sub>10</sub> |         |         |         |         |         | z <sub>16</sub> <sup>+</sup> |
| Delta Da                | -0.21                       | 0.01           | 0.11           | 0.22                        | -0.11                        | 0.29                                                                             |                                 | 0.03                       | 0.19                          | -0.06              | 0.09                          | 0.24                     | 0.10                          |                                            |         | 0.20            |         |         |         |         |         | 0.07                         |

# Peak 475

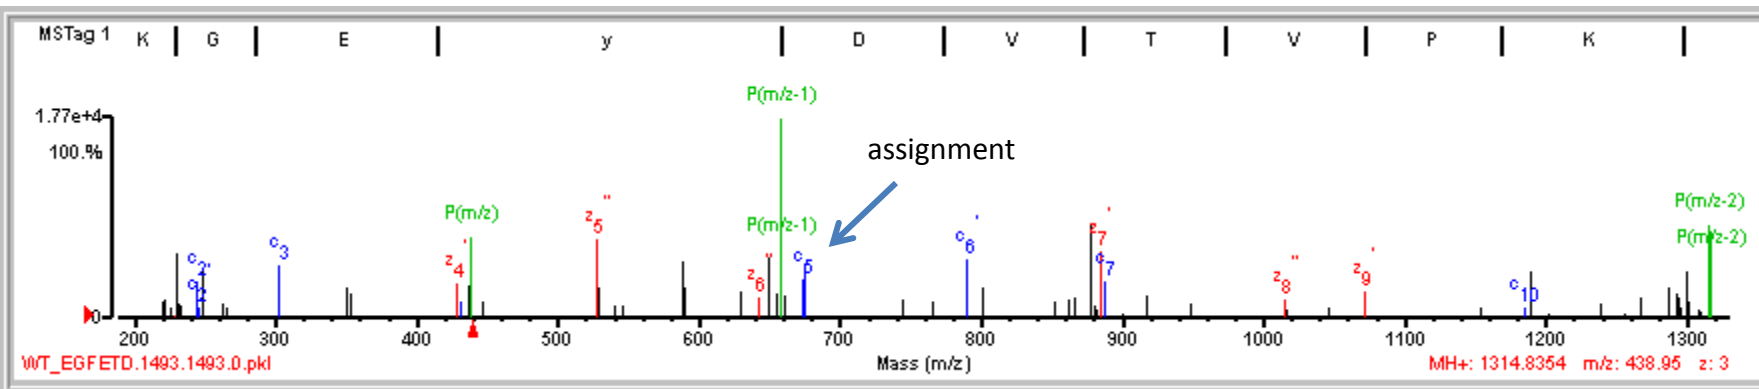

| Rank                    | Score  | SPI (%) | BCS            | # Unmatched Ions | Variable sites | Sequence                                        | MH <sup>+</sup> Calculated (Da) | MH <sup>+</sup> Error (Da) | MH <sup>+</sup> Error (ppm) | Protein MW/pI (Da) | Species      | Accession #              | MS-Digest Index #    | Protein Name                  |        |        |        |        |        |                |                |        |                |                |         |
|-------------------------|--------|---------|----------------|------------------|----------------|-------------------------------------------------|---------------------------------|----------------------------|-----------------------------|--------------------|--------------|--------------------------|----------------------|-------------------------------|--------|--------|--------|--------|--------|----------------|----------------|--------|----------------|----------------|---------|
| 1                       | 6.28   | 54.2    | 7              | 14/25            | Y715y          | (K) V K   G   E   y   D   V   T   V   P   K (L) | 1234.67                         | 80.1677                    | 153.1                       | 629104.8/5.80      | Homo sapiens | <a href="#">61743954</a> | <a href="#">7227</a> | AHNAK nucleoprotein isoform 1 |        |        |        |        |        |                |                |        |                |                |         |
| Fragment-ion (m/z)      | 220.34 | 229.85  | 243.90         | 245.05           | 248.71         | 302.23                                          | 351.15                          | 354.25                     | 431.11                      | 527.44             | 588.86       | 590.84                   | 674.20               | 789.52                        | 801.26 | 861.71 | 866.85 | 877.84 | 880.49 | 885.47         | 888.53         | 917.71 | 1015.04        | 1071.44        | 1189.64 |
| Frac. Inten. (% of TIC) | 3.17   | 6.38    | 1.76           | 3.76             | 3.76           | 4.29                                            | 2.47                            | 1.95                       | 1.51                        | 14.23              | 4.60         | 2.47                     | 7.12                 | 8.34                          | 2.46   | 1.59   | 1.63   | 7.81   | 1.82   | 5.39           | 2.93           | 1.86   | 2.71           | 2.19           | 3.81    |
| Rel. Inten. (% of BP)   | 22.25  | 44.84   | 12.39          | 26.41            | 26.39          | 30.15                                           | 17.34                           | 13.69                      | 10.63                       | 100.00             | 32.31        | 17.34                    | 50.01                | 58.61                         | 17.29  | 11.20  | 11.45  | 54.86  | 12.77  | 37.87          | 20.62          | 13.08  | 19.04          | 15.37          | 26.80   |
| Score                   | -0.22  | -0.45   | 0.25           | 1.00             | -0.26          | 1.00                                            | -0.17                           | -0.14                      | 1.00                        | 1.00               | -0.32        | -0.17                    | 1.00                 | 1.00                          | -0.17  | -0.11  | -0.11  | -0.55  | -0.13  | 1.00           | 1.00           | -0.13  | 0.25           | 1.00           | -0.27   |
| Ion-type                |        |         | y <sub>2</sub> | c <sub>2</sub>   |                | c <sub>3</sub>                                  |                                 |                            | c <sub>4</sub>              | z <sub>5</sub>     |              | c <sub>6</sub>           | c <sub>6</sub>       |                               |        |        |        |        |        | z <sub>7</sub> | c <sub>7</sub> |        | z <sub>8</sub> | z <sub>9</sub> |         |
| Delta Da                |        |         | -0.27          | -0.15            |                | 0.01                                            |                                 |                            | -0.15                       | 0.11               |              |                          | -0.09                | 0.20                          |        |        |        |        |        | 0.08           | 0.14           |        | -0.40          | -0.01          |         |



# Peak 477

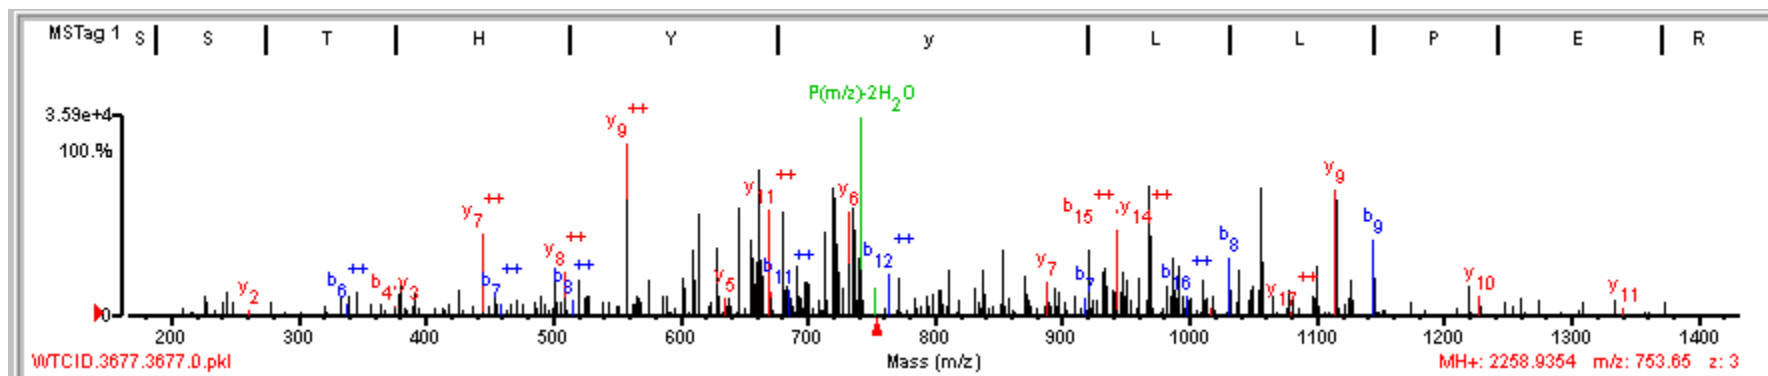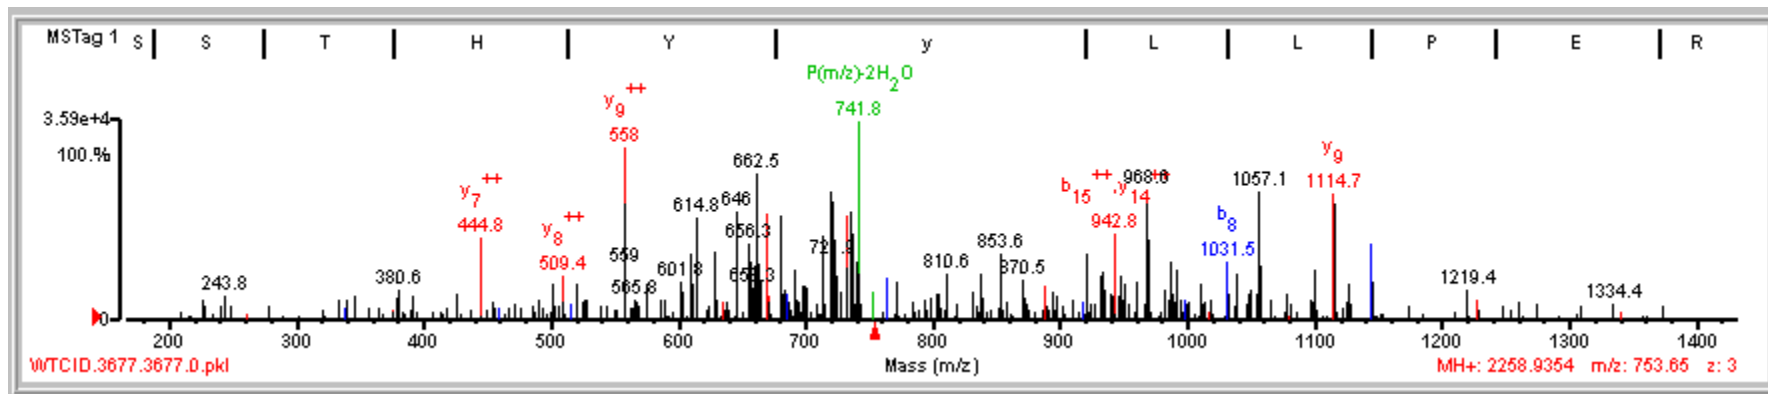

| 1                      | 12.84            | 65.3             | 10     | 9/25              | Y394y              | (K)V/S/S/T/H Y Y/L/L/P E/R/P P Y\L D\R (Y) | 2178.12 | 80.8125 | 374.6                                | 50560.3/8.38       | Homo sapiens | <a href="#">10047086</a> | <a href="#">949</a>             | mitogen-inducible gene 6 protein |        |        |        |        |                                  |                    |        |         |                    |                |                |
|------------------------|------------------|------------------|--------|-------------------|--------------------|--------------------------------------------|---------|---------|--------------------------------------|--------------------|--------------|--------------------------|---------------------------------|----------------------------------|--------|--------|--------|--------|----------------------------------|--------------------|--------|---------|--------------------|----------------|----------------|
| Fragment-ion (m/z)     | 444.81           | 558.01           | 610.04 | 614.82            | 628.72             | 646.00                                     | 656.32  | 659.94  | 662.53                               | 670.56             | 680.23       | 691.91                   | 714.61                          | 720.55                           | 732.68 | 735.17 | 735.93 | 853.60 | 870.52                           | 942.82             | 968.63 | 1031.52 | 1057.12            | 1114.70        | 1144.58        |
| Frac. Inten.(% of TIC) | 2.41             | 9.48             | 2.56   | 2.89              | 3.12               | 3.03                                       | 4.70    | 2.74    | 8.33                                 | 4.21               | 3.66         | 2.48                     | 2.81                            | 0.27                             | 4.33   | 2.66   | 5.51   | 2.49   | 2.95                             | 2.60               | 7.37   | 2.38    | 5.09               | 8.13           | 3.78           |
| Rel. Inten.(% of BP)   | 25.39            | 100.00           | 27.00  | 30.46             | 32.92              | 32.00                                      | 49.56   | 28.93   | 87.87                                | 44.45              | 38.58        | 26.21                    | 29.66                           | 2.81                             | 45.73  | 28.11  | 58.17  | 26.32  | 31.16                            | 27.48              | 77.70  | 25.08   | 53.70              | 85.79          | 39.93          |
| Score                  | 1.00             | 1.00             | -0.27  | 1.00              | 1.00               | -0.32                                      | -0.50   | -0.29   | 1.00                                 | 1.00               | -0.39        | 1.00                     | 0.50                            | 1.50                             | 1.00   | -0.28  | -0.58  | -0.26  | 0.50                             | 1.00               | 1.00   | 1.00    | 1.00               | 1.00           | 1.00           |
| Ion-type               | y <sup>++7</sup> | y <sup>++9</sup> |        | y <sup>++10</sup> | b <sup>+++15</sup> |                                            |         |         | y <sup>+++11</sup> -H <sub>2</sub> O | y <sup>+++11</sup> |              | y <sup>+++16</sup>       | y <sub>6</sub> -NH <sub>3</sub> | y <sup>+++17</sup>               |        |        |        |        | y <sub>7</sub> -H <sub>2</sub> O | b <sup>+++15</sup> |        |         | b <sup>+++17</sup> | y <sub>9</sub> | b <sub>9</sub> |
| Delta Da               | 0.06             | 0.21             |        | 0.48              | 0.09               |                                            |         |         | 0.65                                 | -0.32              |              | 0.58                     | -0.76                           | 0.20                             | 0.29   |        |        |        | 0.04                             | 0.38               |        | 0.10    | 0.62               | 0.11           | 0.07           |
|                        |                  |                  |        |                   | y <sup>+++14</sup> |                                            |         |         | 0.21                                 |                    |              |                          |                                 | 1.50                             |        |        |        |        | 0.36                             |                    |        |         |                    |                |                |



# Peak 478

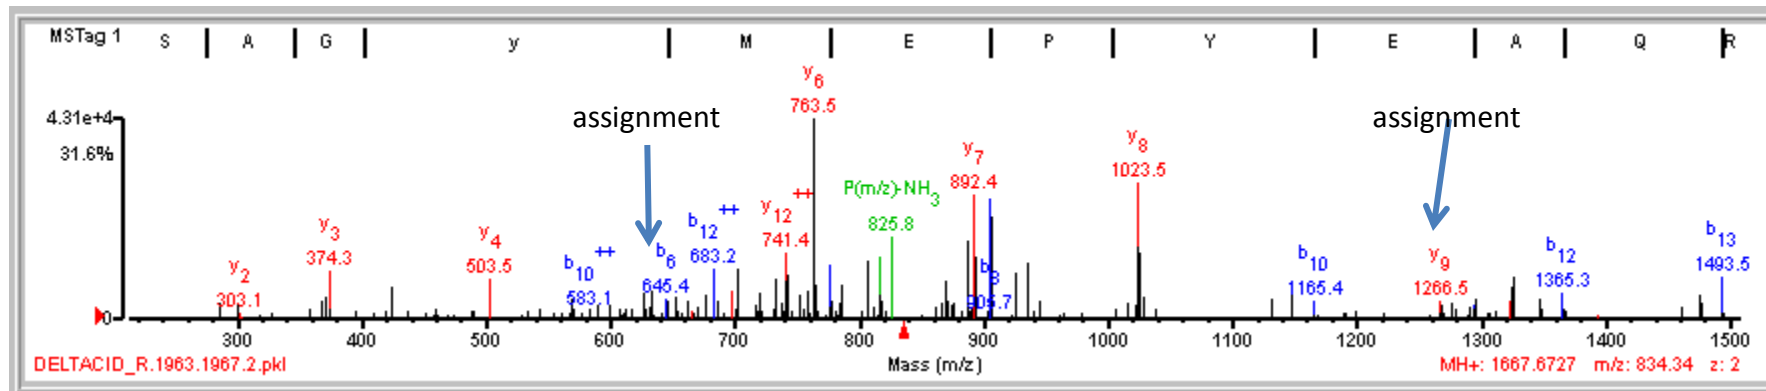

| Rank                    | Score          | SPI (%) | BCS            | # Unmatched Ions                 | Variable sites | Sequence                                                | MH* Calculated (Da)           | MH* Error (Da) | MH* Error (ppm)               | Protein MW/pl (Da)               | Species        | Accession #               | MS-Digest Index #     | Protein Name                                       |                                  |                |                |        |                |                 |                 |                 |         |                 |
|-------------------------|----------------|---------|----------------|----------------------------------|----------------|---------------------------------------------------------|-------------------------------|----------------|-------------------------------|----------------------------------|----------------|---------------------------|-----------------------|----------------------------------------------------|----------------------------------|----------------|----------------|--------|----------------|-----------------|-----------------|-----------------|---------|-----------------|
| 1                       | 15.08          | 86.6    | 10             | 7/24                             | Y268y          | (K) G E / S / A / G / Y   M   E   P Y / E   A Q   R (I) | 1587.67                       | 79.9983        | 19.2                          | 55042.5/9.10                     | Homo sapiens   | <a href="#">106879210</a> | <a href="#">23534</a> | Src homology 2 domain containing adaptor protein B |                                  |                |                |        |                |                 |                 |                 |         |                 |
| Fragment-ion (m/z)      | 374.32         | 423.97  | 503.12         | 627.23                           | 645.35         | 683.16                                                  | 697.87                        | 702.70         | 741.38                        | 758.57                           | 763.47         | 776.35                    | 808.00                | 870.32                                             | 887.27                           | 892.39         | 905.27         | 935.72 | 1023.53        | 1266.88         | 1294.51         | 1324.21         | 1326.29 | 1493.49         |
| Frac. Inten. (% of TIC) | 2.05           | 1.82    | 2.15           | 1.58                             | 1.70           | 1.61                                                    | 1.59                          | 1.82           | 4.79                          | 1.87                             | 31.49          | 2.73                      | 1.88                  | 1.89                                               | 5.12                             | 6.11           | 7.49           | 2.70   | 10.47          | 1.60            | 1.59            | 2.28            | 1.63    | 2.03            |
| Rel. Inten. (% of BP)   | 6.50           | 5.79    | 6.84           | 5.03                             | 5.41           | 5.13                                                    | 5.04                          | 5.77           | 15.23                         | 5.94                             | 100.00         | 8.66                      | 5.98                  | 5.99                                               | 16.25                            | 19.40          | 23.79          | 8.58   | 33.23          | 5.08            | 5.04            | 7.24            | 5.18    | 6.44            |
| Score                   | 1.00           | -0.06   | 1.00           | 0.50                             | 1.00           | -0.05                                                   | 1.00                          | -0.06          | 1.00                          | 0.50                             | 1.00           | 1.00                      | -0.06                 | -0.06                                              | 0.50                             | 1.00           | 1.00           | -0.09  | 1.00           | 1.00            | 1.00            | 1.00            | -0.05   | 1.00            |
| Ion-type                | a <sub>5</sub> |         | y <sub>4</sub> | b <sub>6</sub> -H <sub>2</sub> O | b <sub>6</sub> |                                                         | y <sup>++</sup> <sub>11</sub> |                | y <sup>++</sup> <sub>12</sub> | b <sub>7</sub> -H <sub>2</sub> O | y <sub>6</sub> | b <sub>7</sub>            |                       |                                                    | b <sub>8</sub> -H <sub>2</sub> O | y <sub>7</sub> | b <sub>8</sub> |        | y <sub>8</sub> | a <sub>11</sub> | b <sub>11</sub> | y <sub>10</sub> |         | b <sub>13</sub> |
| Delta Da                | 0.15           |         | -0.14          | 0.05                             | 0.16           |                                                         | 0.09                          |                | 0.09                          | 0.35                             | 0.10           | 0.12                      |                       |                                                    | 0.01                             | -0.03          | -0.00          |        | 0.07           | 0.44            | 0.08            | 0.70            |         | -0.04           |
|                         | y <sub>3</sub> |         |                |                                  |                |                                                         |                               |                |                               |                                  |                |                           |                       |                                                    |                                  |                |                |        |                | y <sub>9</sub>  |                 |                 |         |                 |

# Peak 479

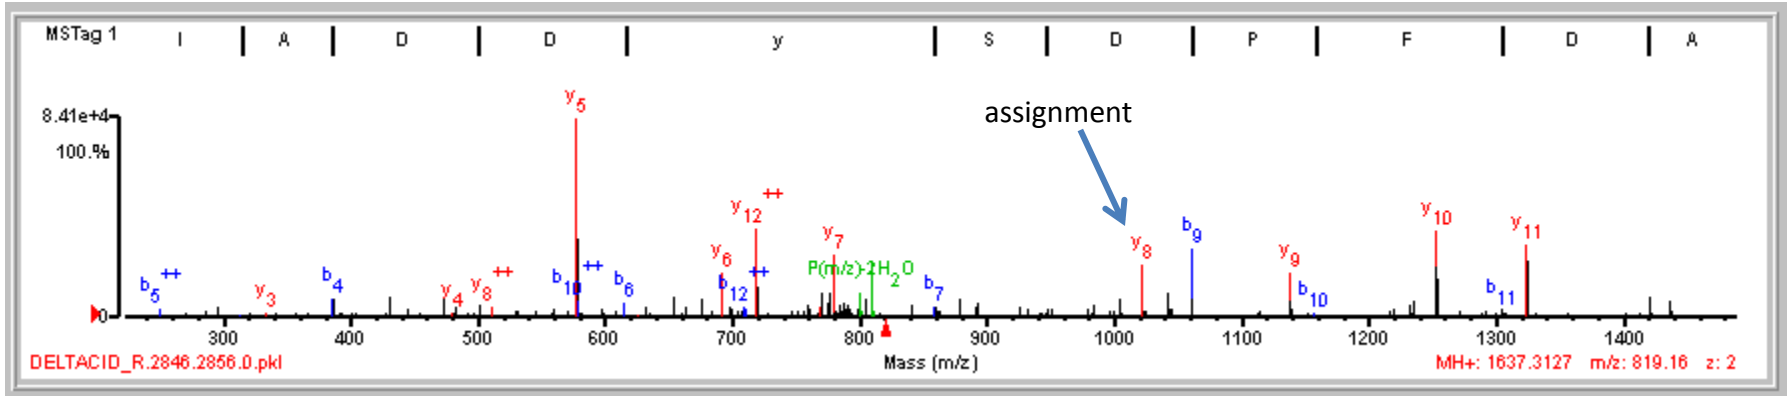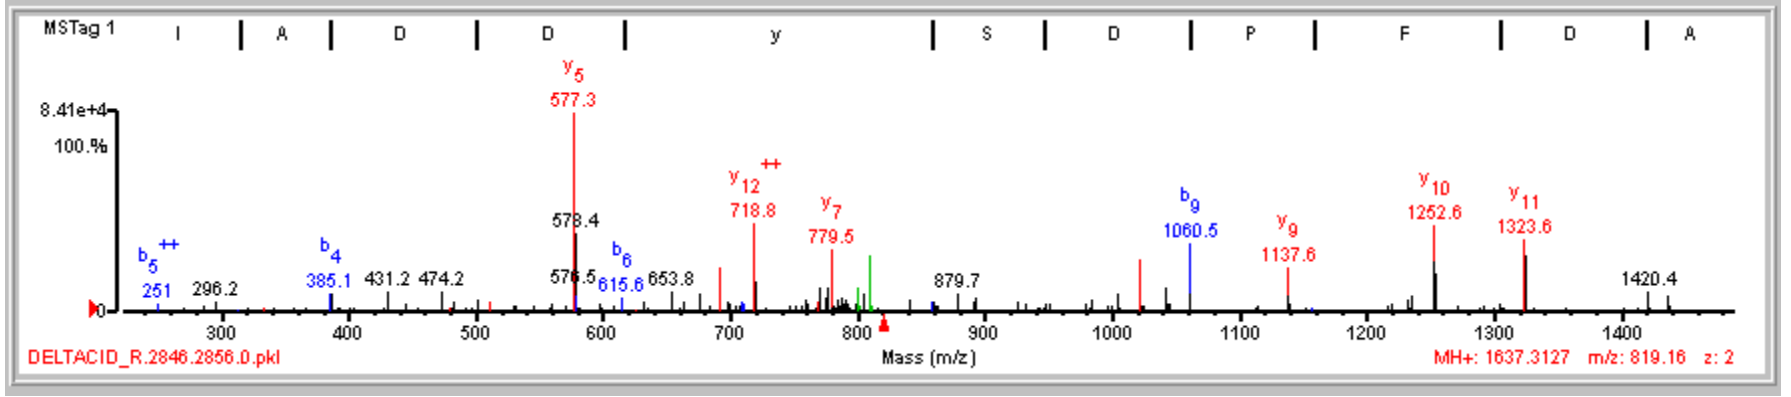

| Rank | Score | SPI (%) | BCS | # Unmatched Ions | Variable sites | Sequence                                            | MH* Calculated (Da) | MH* Error (Da) | MH* Error (ppm) | Protein MW/pl (Da) | Species      | Accession #               | MS-Digest Index #     | Protein Name                                       |
|------|-------|---------|-----|------------------|----------------|-----------------------------------------------------|---------------------|----------------|-----------------|--------------------|--------------|---------------------------|-----------------------|----------------------------------------------------|
| 1    | 11.34 | 86.0    | 8   | 6/18             | Y246y          | (K) V T / I / A / D / D / y / S / D / P F D A K (N) | 1556.71             | 80.6012        | 387.8           | 55042.5/9.10       | Homo sapiens | <a href="#">106879210</a> | <a href="#">23534</a> | Src homology 2 domain containing adaptor protein B |

| Fragment-ion (m/z)      | 577.30         | 653.77 | 692.46         | 718.85                        | 759.71 | 770.42 | 775.71 | 779.51         | 804.52 | 891.33 | 1022.68        | 1042.45                          | 1060.49        | 1137.57        | 1252.64         | 1323.62         | 1420.38 | 1437.18         |
|-------------------------|----------------|--------|----------------|-------------------------------|--------|--------|--------|----------------|--------|--------|----------------|----------------------------------|----------------|----------------|-----------------|-----------------|---------|-----------------|
| Frac. Inten. (% of TIC) | 21.28          | 2.16   | 3.63           | 9.78                          | 2.75   | 0.05   | 2.84   | 5.30           | 2.02   | 1.89   | 4.89           | 2.87                             | 6.69           | 6.39           | 12.49           | 10.35           | 2.35    | 2.27            |
| Rel. Inten. (% of BP)   | 100.00         | 10.15  | 17.06          | 45.94                         | 12.93  | 0.25   | 13.37  | 24.91          | 9.49   | 8.88   | 22.96          | 13.46                            | 31.45          | 30.00          | 58.70           | 48.62           | 11.02   | 10.66           |
| Score                   | 1.00           | -0.10  | 1.00           | 1.00                          | -0.13  | 1.50   | -0.13  | 1.00           | -0.09  | -0.09  | 1.00           | 0.50                             | 1.00           | 1.00           | 1.00            | 1.00            | -0.11   | 1.00            |
| Ion-type                | y <sub>5</sub> |        | y <sub>8</sub> | y <sup>++</sup> <sub>12</sub> |        | sty    |        | y <sub>7</sub> |        |        | y <sub>8</sub> | b <sub>9</sub> -H <sub>2</sub> O | b <sub>9</sub> | y <sub>9</sub> | y <sub>10</sub> | y <sub>11</sub> |         | y <sub>12</sub> |
| Delta Da                | 0.00           |        | 0.14           | 0.07                          |        | 0.57   |        | 0.15           |        |        | 0.29           | 0.07                             | 0.10           | 0.16           | 0.20            | 0.14            |         | 0.62            |



# Peak 481

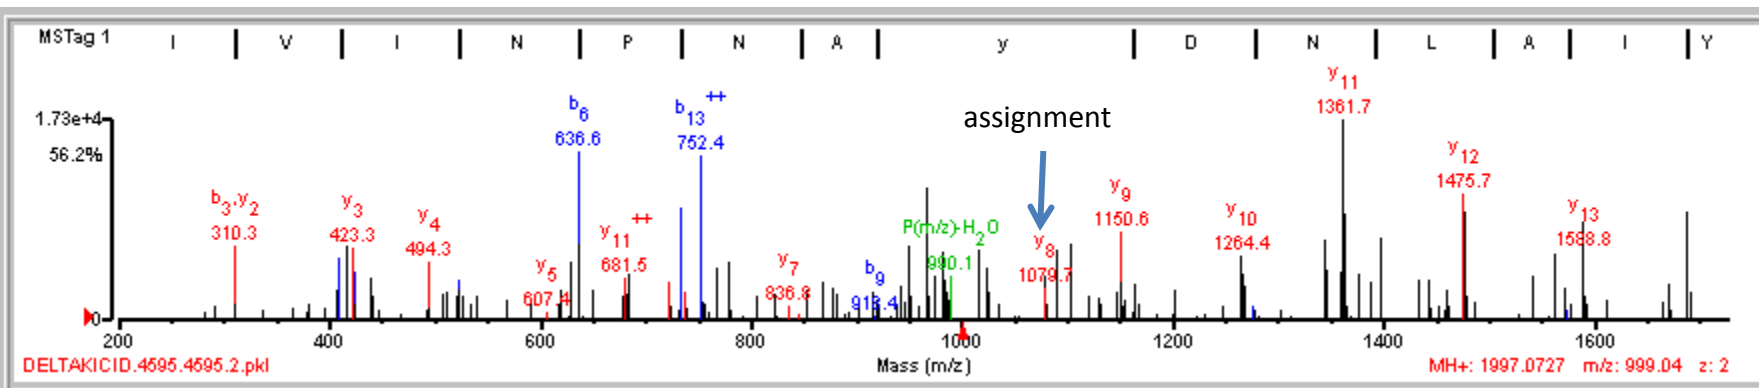

| Rank                    | Score          | SPI (%)        | BCS            | # Unmatched Ions              | Variable sites | Sequence                                              | MH <sup>+</sup> Calculated (Da) | MH <sup>+</sup> Error (Da) | MH <sup>+</sup> Error (ppm) | Protein MW/pI (Da)               | Species         | Accession #               | MS-Digest Index #     | Protein Name              |
|-------------------------|----------------|----------------|----------------|-------------------------------|----------------|-------------------------------------------------------|---------------------------------|----------------------------|-----------------------------|----------------------------------|-----------------|---------------------------|-----------------------|---------------------------|
| 1                       | 10.52          | 87.0           | 7              | 3/14                          | Y635y          | (K) V P I V I / N / P I N / A Y D N L \ A / I Y R (S) | 1917.05                         | 80.0247                    | 29.2                        | 193107.5/6.46                    | Homo sapiens    | <a href="#">148368962</a> | <a href="#">24198</a> | NKF3 kinase family member |
| Fragment-ion (m/z)      | 423.34         | 636.59         | 733.39         | 752.36                        | 950.69         | 966.84                                                | 1078.64                         | 1150.64                    | 1264.40                     | 1344.81                          | 1361.70         | 1475.72                   | 1588.80               | 1688.88                   |
| Frac. Inten. (% of TIC) | 5.06           | 8.82           | 4.12           | 6.61                          | 0.11           | 5.15                                                  | 3.91                            | 5.97                       | 4.70                        | 4.83                             | 27.32           | 12.29                     | 7.17                  | 3.93                      |
| Rel. Inten. (% of BP)   | 18.52          | 32.29          | 15.08          | 24.20                         | 0.42           | 18.87                                                 | 14.30                           | 21.84                      | 17.22                       | 17.67                            | 100.00          | 44.97                     | 26.25                 | 14.40                     |
| Score                   | 1.00           | 1.00           | 1.00           | 1.00                          | 1.50           | -0.19                                                 | -0.14                           | 1.00                       | 1.00                        | 0.50                             | 1.00            | 1.00                      | 1.00                  | -0.14                     |
| Ion-type                | y <sub>3</sub> | b <sub>6</sub> | b <sub>7</sub> | b <sup>++</sup> <sub>13</sub> | sty            |                                                       |                                 | y <sub>9</sub>             | y <sub>10</sub>             | y <sub>11</sub> -NH <sub>3</sub> | y <sub>11</sub> | a <sub>13</sub>           | y <sub>13</sub>       |                           |
| Delta Da                | 0.08           | 0.18           | -0.07          | -0.01                         | 0.67           |                                                       |                                 | 0.12                       | -0.16                       | 0.22                             | 0.09            |                           | -0.01                 | 0.06                      |
|                         |                |                |                |                               |                |                                                       |                                 |                            |                             |                                  |                 | y <sub>12</sub>           | 0.06                  |                           |

# Peak 482

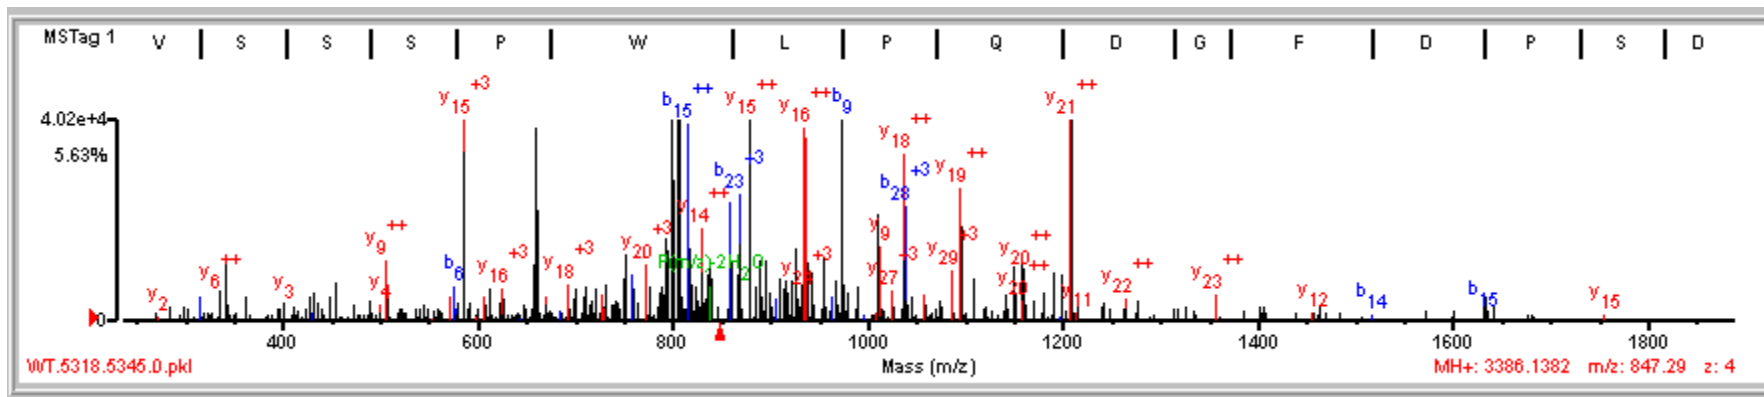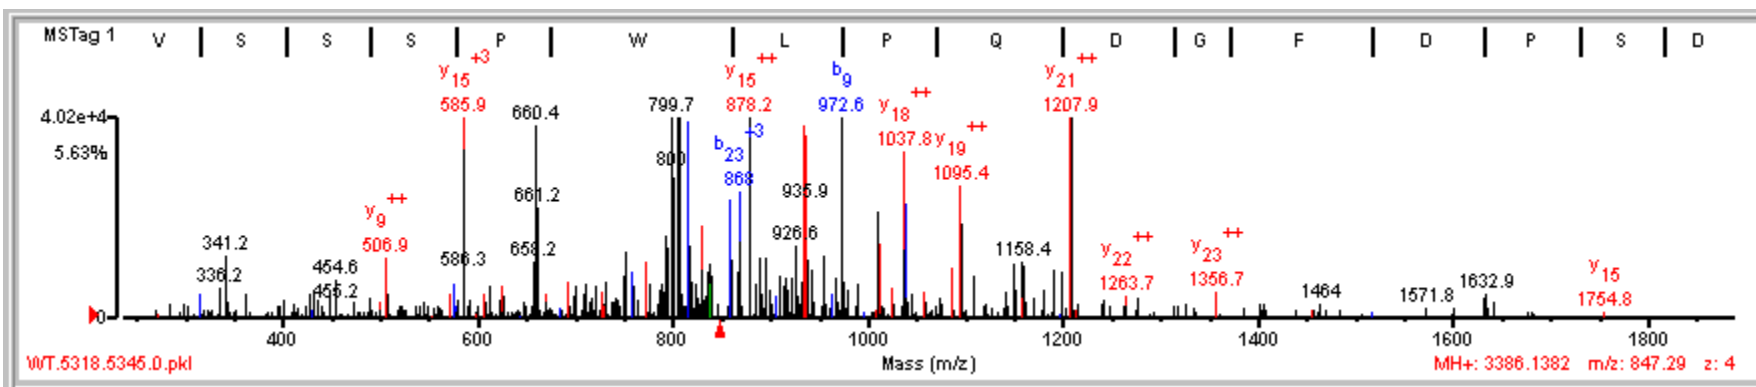

1 17.71 89.6 11 6/25 Y1087y (R)K S V S S S/P W L P/Q/D/G/F/D P/S D y A E/P M D A V V K P R (N) 3305.58 80.5599 175.3 170515.0/6.19 Homo sapiens [150417981](#) [7378](#) glucocorticoid receptor DNA binding factor 1

| Fragment-ion (m/z)     | 341.17 | 506.93             | 585.86             | 660.38 | 751.10 | 793.70 | 799.66 | 805.85             | 816.50             | 829.39             | 859.65         | 868.05 | 878.22             | 926.62                               | 935.49             | 937.55             | 972.64         | 1009.54            | 1012.73        | 1037.48            | 1037.77            | 1095.38            | 1150.04                              | 1159.34            | 1207.90            |
|------------------------|--------|--------------------|--------------------|--------|--------|--------|--------|--------------------|--------------------|--------------------|----------------|--------|--------------------|--------------------------------------|--------------------|--------------------|----------------|--------------------|----------------|--------------------|--------------------|--------------------|--------------------------------------|--------------------|--------------------|
| Frac. Inten.(% of TIC) | 0.60   | 0.76               | 3.77               | 2.14   | 0.67   | 1.10   | 4.05   | 35.69              | 1.95               | 1.38               | 1.43           | 1.88   | 8.83               | 0.90                                 | 3.07               | 2.57               | 15.35          | 1.06               | 0.65           | 0.69               | 2.73               | 2.29               | 0.60                                 | 0.87               | 4.96               |
| Rel. Inten.(% of BP)   | 1.69   | 2.14               | 10.56              | 5.99   | 1.88   | 3.10   | 11.35  | 100.00             | 5.47               | 3.86               | 4.01           | 5.26   | 24.75              | 2.54                                 | 8.61               | 7.21               | 43.02          | 2.96               | 1.82           | 1.92               | 7.65               | 6.41               | 1.69                                 | 2.43               | 13.90              |
| Score                  | -0.02  | 1.00               | 1.00               | -0.06  | -0.02  | -0.03  | -0.11  | 1.00               | 1.00               | 1.00               | 1.00           | -0.05  | 1.00               | 0.50                                 | 1.00               | 1.00               | 1.00           | 1.00               | 1.00           | 1.00               | 1.00               | 1.00               | 0.50                                 | 1.00               | 1.00               |
| Ion-type               |        | b+++ <sub>14</sub> | y+++ <sub>15</sub> |        |        |        |        | y+++ <sub>21</sub> | b+++ <sub>15</sub> | y+++ <sub>14</sub> | b <sub>9</sub> |        | y+++ <sub>15</sub> | y+++ <sub>16</sub> -H <sub>2</sub> O | y+++ <sub>16</sub> | y+++ <sub>24</sub> | b <sub>9</sub> | y+++ <sub>17</sub> | y <sub>9</sub> | y+++ <sub>18</sub> | y+++ <sub>18</sub> | y+++ <sub>19</sub> | y+++ <sub>20</sub> -H <sub>2</sub> O | y+++ <sub>20</sub> | y+++ <sub>21</sub> |
| Delta Da               |        | 0.68               | 0.26               |        |        |        |        | 0.50               | 0.11               | 0.02               | 0.22           |        | 0.33               | 0.22                                 | 0.08               | 0.13               | 0.13           | 0.60               | 0.17           | 0.03               | 0.32               | 0.41               | 0.05                                 | 0.34               | 0.38               |



# Peak 484

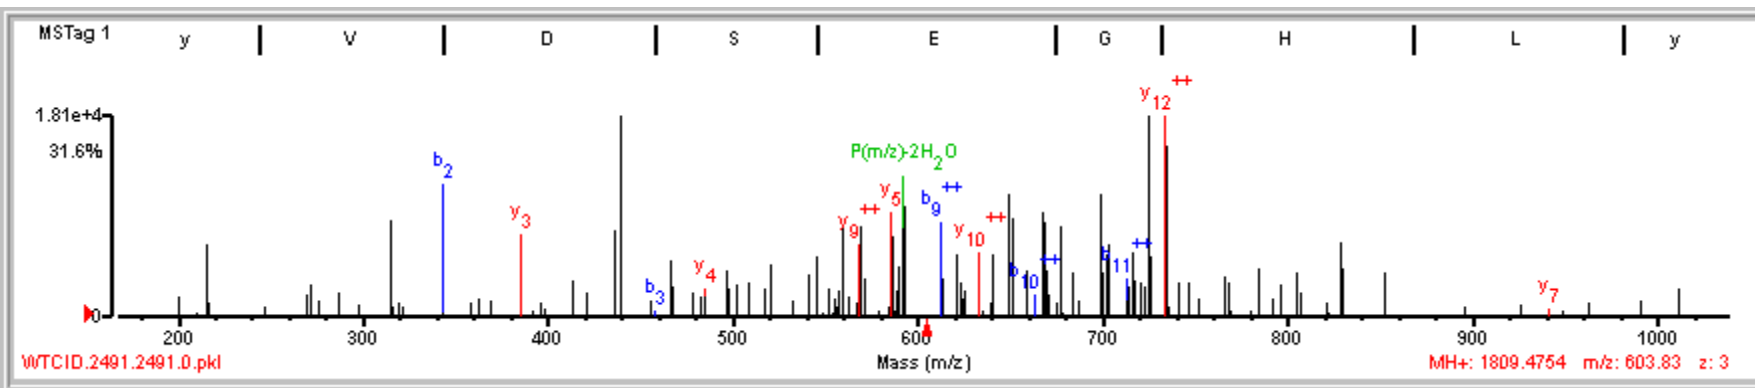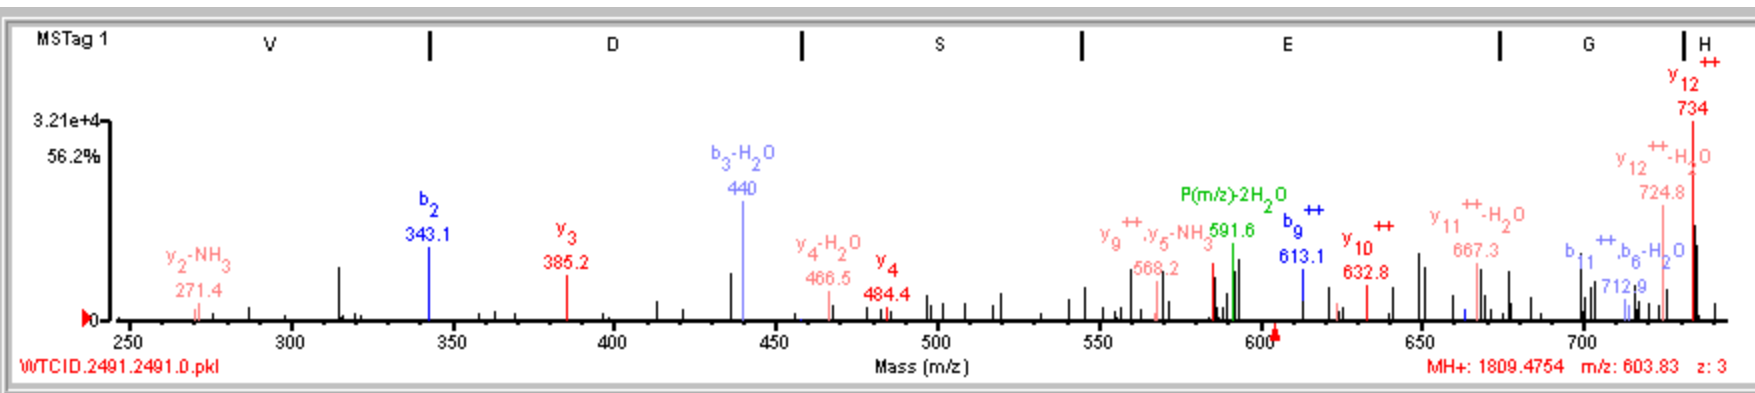

| Rank                    | Score | SPI (%)        | BCS                              | # Unmatched Ions | Variable sites               | Sequence                                        | MH <sup>+</sup> Calculated (Da) | MH <sup>+</sup> Error (Da) | MH <sup>+</sup> Error (ppm) | Protein MW/pi (Da)                              | Species                       | Accession #              | MS-Digest Index #    | Protein Name |
|-------------------------|-------|----------------|----------------------------------|------------------|------------------------------|-------------------------------------------------|---------------------------------|----------------------------|-----------------------------|-------------------------------------------------|-------------------------------|--------------------------|----------------------|--------------|
| 1                       | 6.55  | 93.0           | 3                                | 1/10             | Y6y Y14y                     | (K) Y V I D / S E G H L Y I T V P I R (E)       | 1648.83                         | 160.6425                   | 392.3                       | 20471.7/5.64                                    | Homo sapiens                  | <a href="#">15451856</a> | <a href="#">7145</a> | caveolin 1   |
| Fragment-ion (m/z)      |       | 343.10         | 440.04                           | 585.39           | 613.13                       | 667.31                                          | 676.97                          | 699.33                     | 702.58                      | 724.85                                          | 733.96                        |                          |                      |              |
| Frac. Inten. (% of TIC) |       | 5.14           | 8.11                             | 9.33             | 5.02                         | 9.34                                            | 4.96                            | 7.02                       | 5.08                        | 10.13                                           | 35.86                         |                          |                      |              |
| Rel. Inten. (% of BP)   |       | 14.35          | 22.61                            | 26.01            | 14.01                        | 26.04                                           | 13.82                           | 19.58                      | 14.18                       | 28.26                                           | 100.00                        |                          |                      |              |
| Score                   |       | 1.00           | 0.50                             | 1.00             | 1.00                         | 0.50                                            | 1.00                            | -0.20                      | 0.25                        | 0.50                                            | 1.00                          |                          |                      |              |
| Ion-type                |       | b <sub>2</sub> | b <sub>3</sub> -H <sub>2</sub> O | y <sub>5</sub>   | b <sup>++</sup> <sub>9</sub> | y <sup>++</sup> <sub>11</sub> -H <sub>2</sub> O | y <sup>++</sup> <sub>11</sub>   |                            | a <sub>6</sub>              | y <sup>++</sup> <sub>12</sub> -H <sub>2</sub> O | y <sup>++</sup> <sub>12</sub> |                          |                      |              |
| Delta Da                |       | -0.01          | -0.08                            | 0.02             | 0.43                         | -0.01                                           | 0.65                            |                            | -0.65                       | 0.02                                            | 0.12                          |                          |                      |              |

# Peak 485

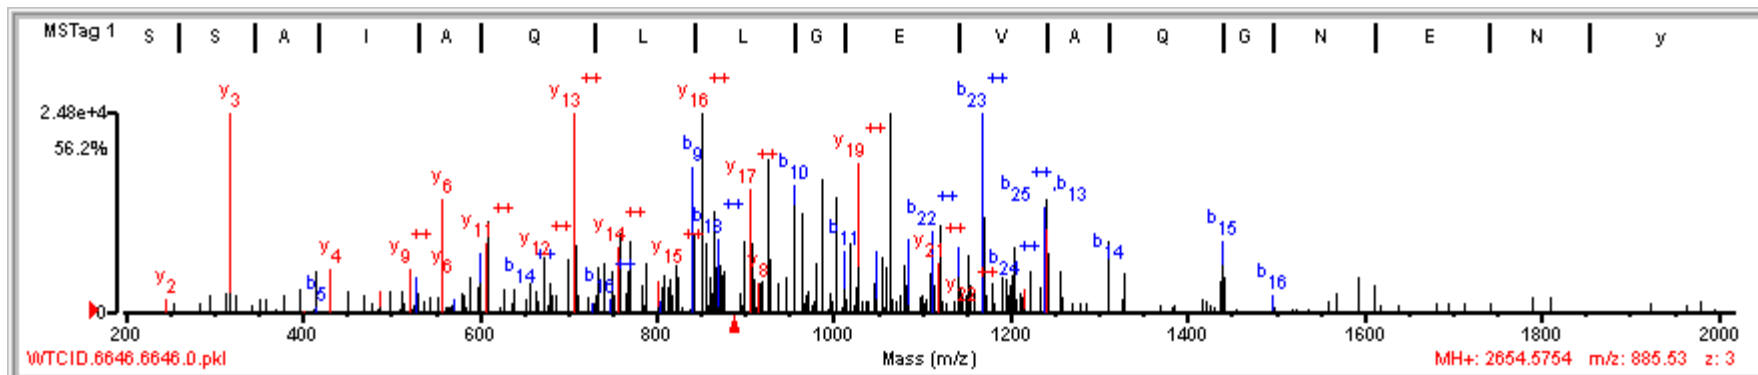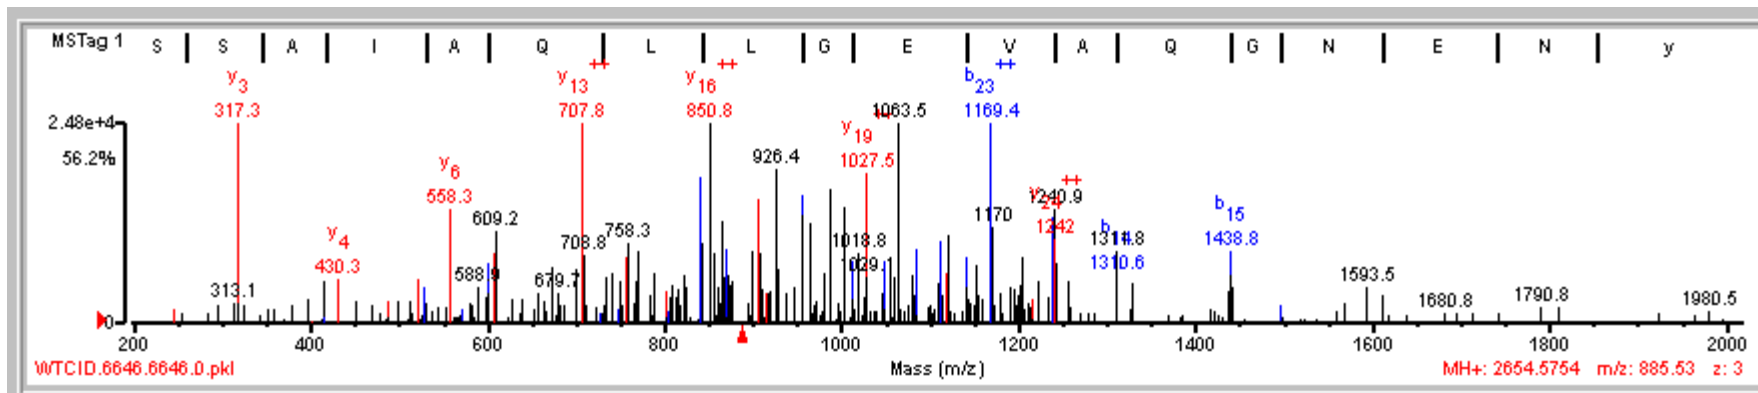

| Rank                    | Score          | SPI (%)        | BCS                           | # Unmatched Ions              | Variable sites                | Sequence                                                     | MH <sup>+</sup> Calculated (Da) | MH <sup>+</sup> Error (Da)                      | MH <sup>+</sup> Error (ppm)   | Protein MW/pl (Da)                              | Species                       | Accession #                   | MS-Digest Index #                               | Protein Name                  |        |         |                                                 |                               |                               |                               |                               |                               |                               |                 |                 |
|-------------------------|----------------|----------------|-------------------------------|-------------------------------|-------------------------------|--------------------------------------------------------------|---------------------------------|-------------------------------------------------|-------------------------------|-------------------------------------------------|-------------------------------|-------------------------------|-------------------------------------------------|-------------------------------|--------|---------|-------------------------------------------------|-------------------------------|-------------------------------|-------------------------------|-------------------------------|-------------------------------|-------------------------------|-----------------|-----------------|
| 1                       | 20.37          | 93.0           | 14                            | 3/25                          | Y116y                         | (K)A V S S A I A/Q/L I G E V/A/Q I G N E N/Y/A G I/A A/R (D) | 2573.33                         | 81.2436                                         | 481.2                         | 269669.4/5.75                                   | Homo sapiens                  | <a href="#">16753233</a>      | <a href="#">1400</a>                            | taln 1                        |        |         |                                                 |                               |                               |                               |                               |                               |                               |                 |                 |
| Fragment-ion (m/z)      | 317.26         | 558.33         | 608.32                        | 672.41                        | 707.83                        | 757.41                                                       | 768.77                          | 841.66                                          | 850.81                        | 898.48                                          | 907.11                        | 926.45                        | 954.87                                          | 964.11                        | 988.64 | 1002.34 | 1018.85                                         | 1027.48                       | 1063.47                       | 1112.46                       | 1169.45                       | 1239.66                       | 1240.87                       | 1310.60         | 1438.82         |
| Frac. Inten. (% of TIC) | 5.88           | 2.84           | 3.14                          | 2.11                          | 5.20                          | 2.97                                                         | 2.20                            | 5.27                                            | 11.07                         | 3.09                                            | 4.72                          | 2.93                          | 5.32                                            | 2.71                          | 2.59   | 2.23    | 2.17                                            | 4.59                          | 5.46                          | 2.13                          | 8.08                          | 2.04                          | 5.30                          | 2.32            | 3.63            |
| Rel. Inten. (% of BP)   | 53.15          | 25.69          | 28.38                         | 19.04                         | 47.00                         | 26.84                                                        | 19.91                           | 47.64                                           | 100.00                        | 27.92                                           | 42.67                         | 26.50                         | 48.10                                           | 24.46                         | 23.38  | 20.15   | 19.63                                           | 41.46                         | 49.32                         | 19.22                         | 73.04                         | 18.45                         | 47.86                         | 20.92           | 32.82           |
| Score                   | 1.00           | 1.00           | 1.00                          | 1.00                          | 1.00                          | 1.00                                                         | -0.20                           | 1.00                                            | 1.00                          | 0.50                                            | 1.00                          | 1.00                          | 1.00                                            | 1.00                          | -0.23  | -0.20   | 0.50                                            | 1.00                          | 1.00                          | 1.00                          | 1.00                          | 1.00                          | 1.00                          | 1.00            | 1.00            |
| Ion-type                | a <sub>4</sub> | y <sub>6</sub> | y <sup>++</sup> <sub>11</sub> | y <sup>++</sup> <sub>12</sub> | y <sup>++</sup> <sub>13</sub> | y <sup>++</sup> <sub>14</sub>                                |                                 | b <sub>9</sub>                                  | y <sup>++</sup> <sub>16</sub> | y <sup>++</sup> <sub>17</sub> -H <sub>2</sub> O | y <sup>++</sup> <sub>17</sub> | a <sub>10</sub>               | b <sub>10</sub>                                 | y <sup>++</sup> <sub>18</sub> |        |         | y <sup>++</sup> <sub>19</sub> -H <sub>2</sub> O | y <sup>++</sup> <sub>19</sub> | y <sup>++</sup> <sub>20</sub> | a <sub>12</sub>               | b <sup>++</sup> <sub>23</sub> | b <sub>13</sub>               | b <sup>++</sup> <sub>25</sub> | b <sub>14</sub> | b <sub>15</sub> |
| Delta Da                | 0.08           | -0.01          | 0.06                          | 0.12                          | 0.02                          | 0.07                                                         |                                 | 0.18                                            | 0.43                          | 0.57                                            | 0.19                          | -0.12                         | 0.31                                            | 0.65                          |        |         | 0.37                                            | -0.01                         | 0.46                          | -0.17                         | 0.39                          | -0.03                         | 0.77                          | -0.13           | 0.03            |
|                         | y <sub>3</sub> |                |                               |                               |                               |                                                              |                                 | y <sup>++</sup> <sub>16</sub> -H <sub>2</sub> O |                               | y <sub>8</sub> -NH <sub>3</sub>                 |                               | b <sup>++</sup> <sub>19</sub> | y <sup>++</sup> <sub>18</sub> -H <sub>2</sub> O |                               |        |         | y <sub>9</sub> -NH <sub>3</sub>                 |                               |                               | b <sup>++</sup> <sub>22</sub> |                               | b <sup>++</sup> <sub>25</sub> |                               |                 |                 |
|                         | 0.07           |                |                               |                               |                               |                                                              |                                 | 0.29                                            |                               | 0.10                                            |                               | -0.52                         | 0.42                                            |                               |        |         | 0.06                                            |                               |                               | -0.06                         |                               | -0.44                         |                               |                 |                 |





# Peak 487

assignment

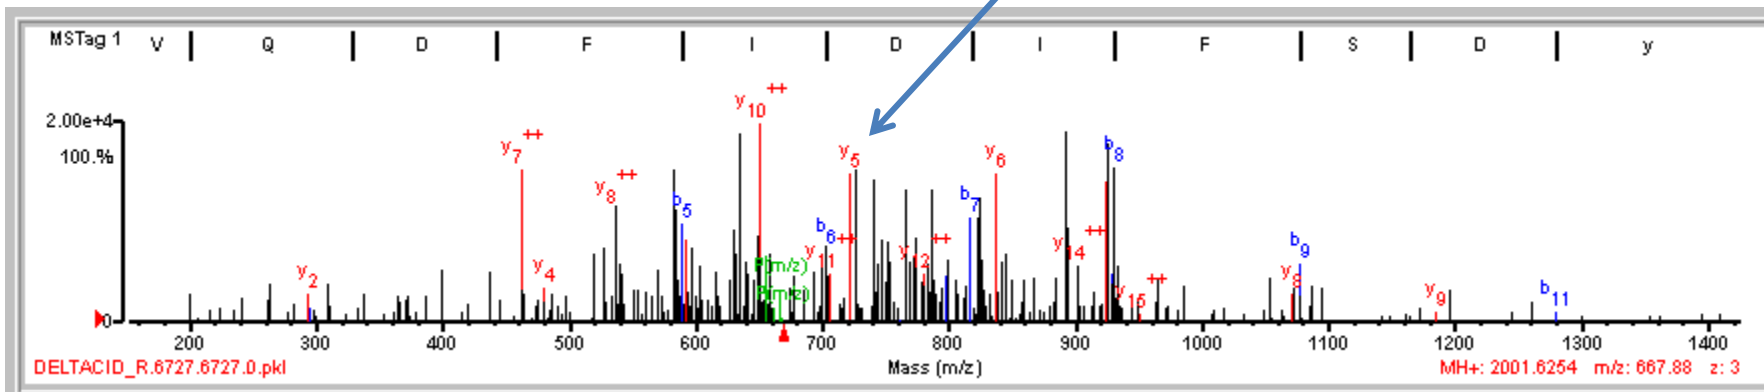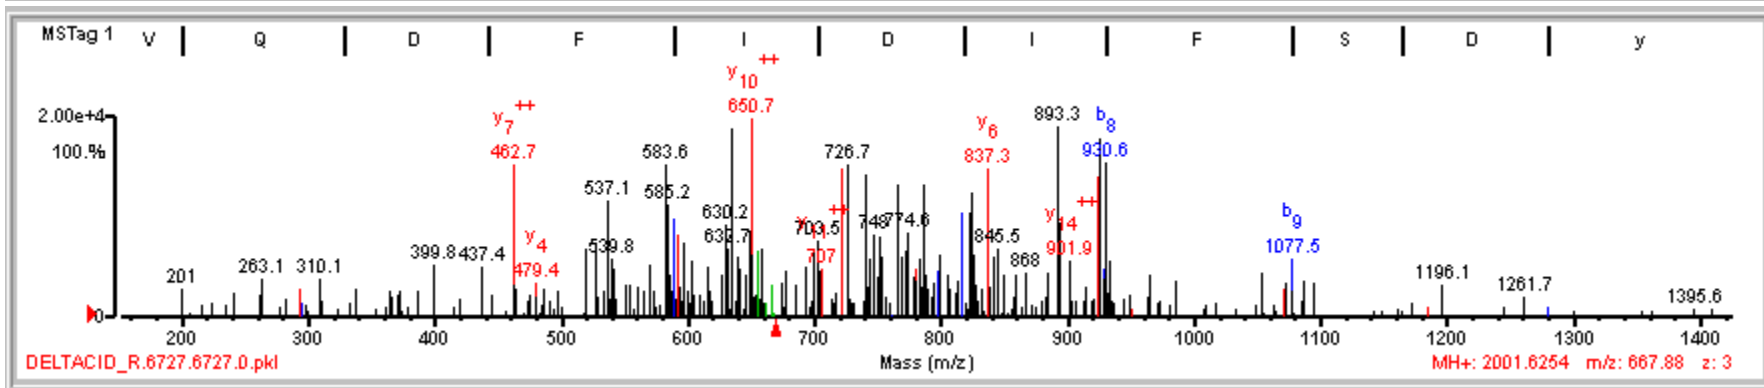

| Rank | Score | SPI (%) | BCS | # Unmatched Ions | Variable sites | Sequence                              | MH <sup>+</sup> Calculated (Da) | MH <sup>+</sup> Error (Da) | MH <sup>+</sup> Error (ppm) | Protein MW/pl (Da) | Species      | Accession #              | MS-Digest Index #     | Protein Name                                                       |
|------|-------|---------|-----|------------------|----------------|---------------------------------------|---------------------------------|----------------------------|-----------------------------|--------------------|--------------|--------------------------|-----------------------|--------------------------------------------------------------------|
| 1    | 9.47  | 74.2    | 6   | 4/15             | Y638y          | (K)V/VQ/D/F/I/D I/F/S/D/Y A/N/F/K (-) | 1920.94                         | 80.6876                    | 360.4                       | 74595.8/7.28       | Homo sapiens | <a href="#">18860859</a> | <a href="#">8660</a>  | protein tyrosine phosphatase, receptor type, E isoform 2           |
| 1    | 9.47  | 74.2    | 6   | 4/15             | Y696y          | (K)V/VQ/D/F/I/D I/F/S/D/Y A/N/F/K (-) | 1920.94                         | 80.6876                    | 360.4                       | 80642.2/6.57       | Homo sapiens | <a href="#">5729993</a>  | <a href="#">26391</a> | protein tyrosine phosphatase, receptor type, E isoform 1 precursor |

| Fragment-ion (m/z)      | 462.67                          | 536.45           | 583.57            | 585.24             | 634.65            | 650.69         | 702.48         | 722.30 | 726.71 | 741.35 | 823.09 | 837.30            | 893.33                             | 924.47         | 930.58         |
|-------------------------|---------------------------------|------------------|-------------------|--------------------|-------------------|----------------|----------------|--------|--------|--------|--------|-------------------|------------------------------------|----------------|----------------|
| Frac. Inten. (% of TIC) | 6.21                            | 7.66             | 6.00              | 6.04               | 0.18              | 9.94           | 5.70           | 4.41   | 4.42   | 7.98   | 7.39   | 5.67              | 8.24                               | 9.96           | 10.21          |
| Rel. Inten. (% of BP)   | 60.87                           | 75.02            | 58.82             | 59.14              | 1.73              | 97.34          | 55.79          | 43.19  | 43.34  | 78.22  | 72.36  | 55.59             | 80.72                              | 97.54          | 100.00         |
| Score                   | 1.00                            | 1.00             | 1.00              | -0.59              | 1.50              | 1.00           | 1.00           | 1.00   | -0.43  | -0.78  | -0.72  | 1.00              | 0.50                               | 1.00           | 1.00           |
| Ion-type                | y <sup>++7</sup>                | y <sup>++8</sup> | b <sup>++10</sup> | y <sup>+++15</sup> | y <sup>++10</sup> | b <sub>6</sub> | y <sub>5</sub> |        |        |        |        | y <sub>6</sub>    | y <sup>++14</sup> H <sub>2</sub> O | y <sub>7</sub> | b <sub>8</sub> |
| Delta Da                | -0.01                           | 0.24             | 0.77              | 0.03               | 0.42              | 0.10           | 0.01           |        |        |        |        | -0.02             | 0.45                               | 0.12           | 0.09           |
|                         | y <sub>4</sub> -NH <sub>3</sub> |                  |                   |                    |                   |                |                |        |        |        |        | y <sup>++13</sup> |                                    |                |                |
|                         | 0.44                            |                  |                   |                    |                   |                |                |        |        |        |        | -0.56             |                                    |                |                |

# Peak 488

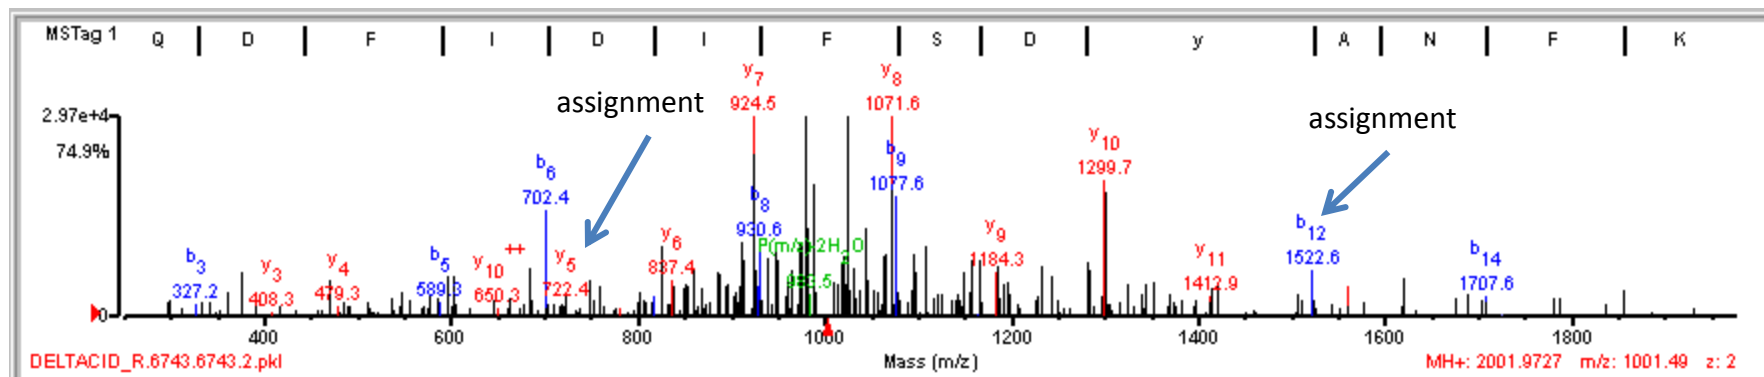

| Fragment-ion (m/z)      | 702.43         | 912.42                           | 924.48         | 930.64         | 979.30 | 989.85 | 1026.08 | 1071.61        | 1077.57        | 1184.32        | 1282.52                          | 1299.67         |
|-------------------------|----------------|----------------------------------|----------------|----------------|--------|--------|---------|----------------|----------------|----------------|----------------------------------|-----------------|
| Frac. Inten. (% of TIC) | 5.11           | 5.01                             | 16.54          | 4.21           | 10.51  | 5.99   | 8.69    | 16.00          | 7.56           | 4.62           | 4.81                             | 10.95           |
| Rel. Inten. (% of BP)   | 30.88          | 30.29                            | 100.00         | 25.46          | 63.58  | 36.24  | 52.57   | 96.75          | 45.73          | 27.96          | 29.10                            | 66.21           |
| Score                   | 1.00           | 0.50                             | 1.00           | 1.00           | -0.64  | -0.36  | -0.53   | 1.00           | 1.00           | 1.00           | 0.50                             | 1.00            |
| Ion-type                | b <sub>6</sub> | b <sub>8</sub> -H <sub>2</sub> O | y <sub>7</sub> | b <sub>8</sub> |        |        |         | y <sub>8</sub> | b <sub>9</sub> | y <sub>9</sub> | y <sub>10</sub> -NH <sub>3</sub> | y <sub>10</sub> |
| Delta Da                | 0.05           | -0.06                            | 0.13           | 0.15           |        |        |         | 0.19           | 0.01           | -0.18          | 0.02                             | 0.14            |

# Peak 489

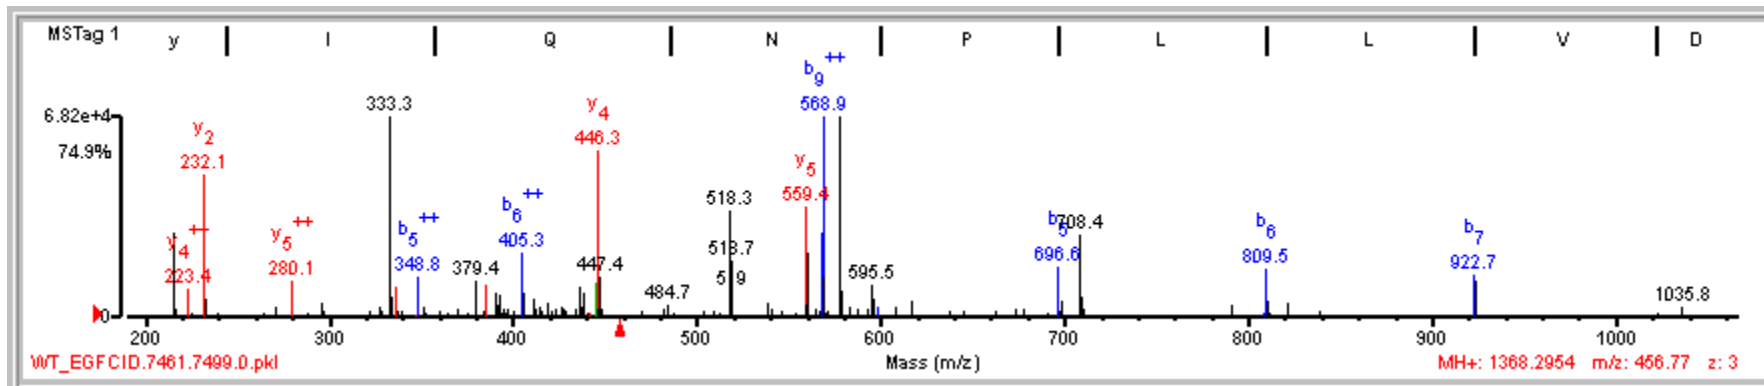

## Detailed Results

| Rank                    | Score                           | SPI (%)        | BCS                          | # Unmatched Ions | Variable sites               | Sequence                        | MH <sup>+</sup> Calculated (Da) | MH <sup>+</sup> Error (Da)   | MH <sup>+</sup> Error (ppm) | Protein MW/pI (Da)           | Species      | Accession #              | MS-Digest Index #     | Protein Name                                   |                                                |                              |                              |        |        |        |        |                |        |                |                |
|-------------------------|---------------------------------|----------------|------------------------------|------------------|------------------------------|---------------------------------|---------------------------------|------------------------------|-----------------------------|------------------------------|--------------|--------------------------|-----------------------|------------------------------------------------|------------------------------------------------|------------------------------|------------------------------|--------|--------|--------|--------|----------------|--------|----------------|----------------|
| 1                       | 10.75                           | 56.3           | 5                            | 10/25            | Y291y                        | (R) y I Q N P L L V D I G R (K) | 1287.71                         | 80.5899                      | 455.7                       | 45461.9/8.83                 | Homo sapiens | <a href="#">23397544</a> | <a href="#">10136</a> | tubulin tyrosine ligase-like family, member 10 |                                                |                              |                              |        |        |        |        |                |        |                |                |
| Fragment-ion (m/z)      | 215.04                          | 232.06         | 280.14                       | 333.28           | 336.88                       | 348.82                          | 379.42                          | 385.21                       | 391.16                      | 405.32                       | 411.95       | 436.24                   | 438.24                | 446.31                                         | 518.34                                         | 559.44                       | 568.56                       | 568.87 | 577.50 | 577.79 | 595.50 | 696.56         | 708.44 | 809.52         | 922.73         |
| Frac. Inten. (% of TIC) | 3.43                            | 5.82           | 1.30                         | 10.33            | 1.30                         | 1.45                            | 1.56                            | 1.21                         | 1.36                        | 3.46                         | 1.35         | 1.71                     | 1.71                  | 8.19                                           | 7.18                                           | 6.77                         | 3.03                         | 10.36  | 2.45   | 11.64  | 1.83   | 2.08           | 4.12   | 3.22           | 3.14           |
| Rel. Inten. (% of BP)   | 29.46                           | 50.01          | 11.16                        | 88.79            | 11.21                        | 12.42                           | 13.44                           | 10.38                        | 11.70                       | 29.75                        | 11.62        | 14.73                    | 14.71                 | 70.37                                          | 61.75                                          | 58.18                        | 26.03                        | 89.01  | 21.05  | 100.00 | 15.75  | 17.89          | 35.38  | 27.66          | 27.01          |
| Score                   | 0.50                            | 1.00           | 1.00                         | -0.89            | 1.00                         | 1.00                            | 1.00                            | 1.00                         | -0.12                       | 1.00                         | -0.12        | -0.15                    | -0.15                 | 1.00                                           | -0.62                                          | 1.00                         | 1.00                         | 1.00   | -0.21  | -1.00  | -0.16  | 1.00           | -0.35  | 1.00           | 1.00           |
| Ion-type                | y <sub>2</sub> -NH <sub>3</sub> | y <sub>2</sub> | y <sup>++</sup> <sub>5</sub> |                  | y <sup>++</sup> <sub>6</sub> | b <sup>++</sup> <sub>5</sub>    | b <sup>+++</sup> <sub>9</sub>   | y <sup>++</sup> <sub>7</sub> |                             | b <sup>++</sup> <sub>6</sub> |              |                          |                       | y <sub>4</sub>                                 | b <sup>++</sup> <sub>9</sub> -H <sub>2</sub> O | b <sup>++</sup> <sub>9</sub> | b <sup>++</sup> <sub>9</sub> |        |        |        |        | b <sub>5</sub> |        | b <sub>6</sub> | b <sub>7</sub> |
| Delta Da                | -0.07                           | -0.08          | -0.02                        |                  | 0.17                         | 0.18                            | -0.10                           | -0.02                        |                             | 0.14                         |              |                          |                       | 0.07                                           |                                                | -0.33                        | -0.21                        | 0.10   |        |        |        | 0.28           |        | 0.16           | 0.29           |



# Peak 491

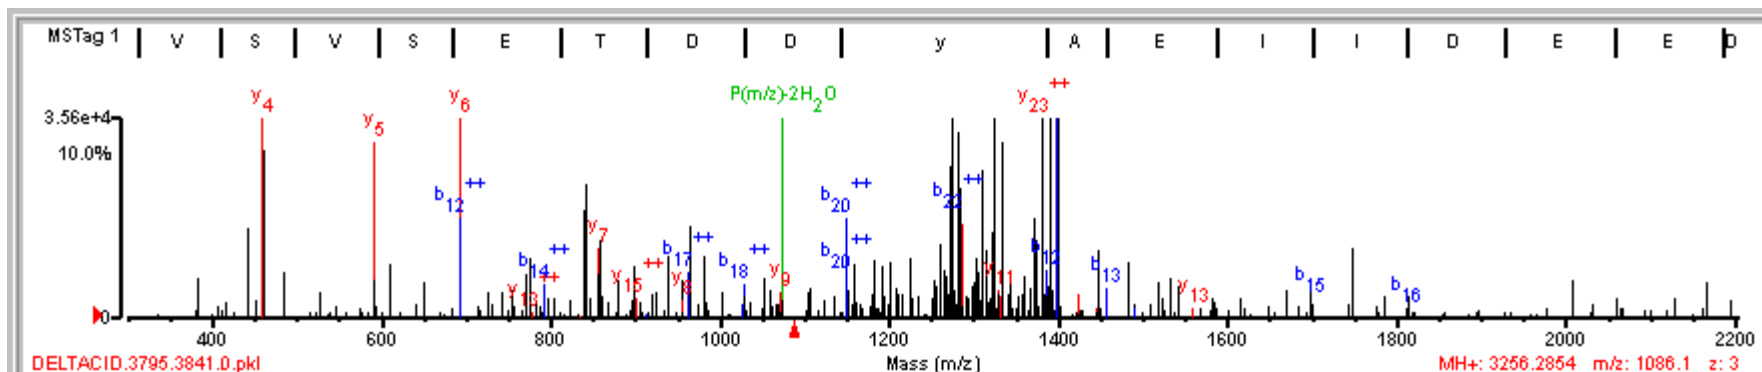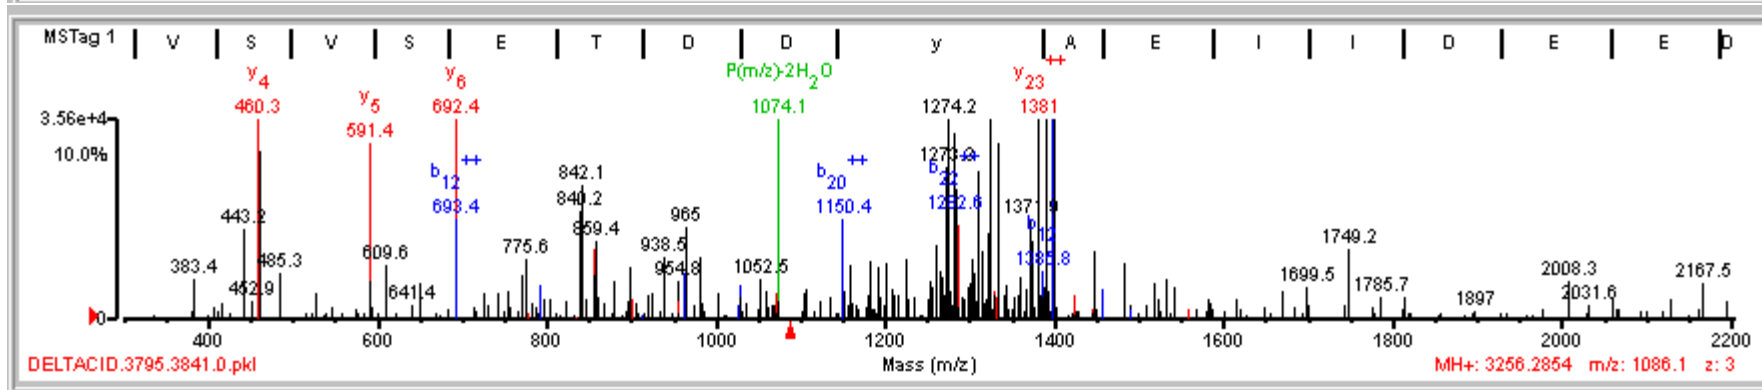

| 1                       | 17.85          | 96.4           | 9              | 3/25   | Y397y  | (R) T R A V S V S E T D D y A E I I D E E D T Y I T I M P S T R (D) | 3175.39                       | 80.8959                       | 285.5                            | 119233.7/6.19                                   | Homo sapiens                  | <a href="#">24476013</a> | <a href="#">12819</a>                           | PTK2 protein tyrosine kinase 2 isoform a        |                               |                               |                               |                                   |                                                 |                               |                                                 |                               |                 |                                                 |                               |
|-------------------------|----------------|----------------|----------------|--------|--------|---------------------------------------------------------------------|-------------------------------|-------------------------------|----------------------------------|-------------------------------------------------|-------------------------------|--------------------------|-------------------------------------------------|-------------------------------------------------|-------------------------------|-------------------------------|-------------------------------|-----------------------------------|-------------------------------------------------|-------------------------------|-------------------------------------------------|-------------------------------|-----------------|-------------------------------------------------|-------------------------------|
| Fragment-ion (m/z)      | 460.28         | 591.36         | 692.38         | 840.22 | 842.10 | 855.44                                                              | 963.67                        | 1150.44                       | 1183.24                          | 1191.91                                         | 1201.71                       | 1264.92                  | 1273.31                                         | 1274.25                                         | 1282.62                       | 1283.02                       | 1287.10                       | 1311.44                           | 1324.13                                         | 1333.76                       | 1371.94                                         | 1380.97                       | 1385.79         | 1389.94                                         | 1398.97                       |
| Frac. Inten. (% of TIC) | 11.83          | 2.30           | 3.08           | 1.10   | 1.08   | 1.14                                                                | 1.20                          | 1.83                          | 0.92                             | 1.00                                            | 1.06                          | 1.42                     | 1.90                                            | 3.43                                            | 0.84                          | 2.70                          | 0.87                          | 1.20                              | 6.13                                            | 2.31                          | 1.10                                            | 6.20                          | 0.90            | 20.19                                           | 24.67                         |
| Rel. Inten. (% of BP)   | 47.14          | 9.33           | 12.41          | 4.45   | 4.39   | 4.62                                                                | 4.85                          | 6.80                          | 3.73                             | 4.08                                            | 4.29                          | 5.77                     | 7.70                                            | 13.91                                           | 3.42                          | 10.98                         | 3.54                          | 4.88                              | 24.85                                           | 9.38                          | 4.45                                            | 25.15                         | 3.85            | 81.88                                           | 100.00                        |
| Score                   | 1.00           | 1.00           | 1.00           | -0.04  | -0.04  | 1.00                                                                | 1.00                          | 1.00                          | 0.50                             | 0.50                                            | 1.00                          | -0.08                    | 0.50                                            | 0.50                                            | 1.00                          | 1.00                          | 1.00                          | 0.50                              | 0.50                                            | 1.00                          | 0.50                                            | 1.00                          | 1.00            | 0.50                                            | 1.00                          |
| Ion-type                | y <sub>4</sub> | y <sub>5</sub> | y <sub>6</sub> |        |        | y <sub>7</sub>                                                      | b <sup>++</sup> <sub>17</sub> | b <sup>++</sup> <sub>20</sub> | y <sub>10</sub> -NH <sub>3</sub> | b <sup>++</sup> <sub>21</sub> -H <sub>2</sub> O | b <sup>++</sup> <sub>21</sub> |                          | b <sup>++</sup> <sub>22</sub> -H <sub>2</sub> O | b <sup>++</sup> <sub>22</sub> -H <sub>2</sub> O | b <sup>++</sup> <sub>22</sub> | b <sup>++</sup> <sub>22</sub> | y <sup>++</sup> <sub>21</sub> | y <sub>11</sub> -H <sub>2</sub> O | b <sup>++</sup> <sub>23</sub> -H <sub>2</sub> O | b <sup>++</sup> <sub>23</sub> | y <sup>++</sup> <sub>23</sub> -H <sub>2</sub> O | y <sup>++</sup> <sub>23</sub> | b <sub>12</sub> | b <sup>++</sup> <sub>24</sub> -H <sub>2</sub> O | b <sup>++</sup> <sub>24</sub> |
| Delta Da                | 0.03           | 0.07           | 0.04           |        |        | 0.04                                                                | -0.23                         | -0.02                         | -0.25                            | -0.07                                           | 0.73                          |                          | -0.20                                           | 0.74                                            | 0.10                          | 0.50                          | -0.41                         | -0.11                             | 0.10                                            | 0.72                          | 0.39                                            | 0.41                          | 0.26            | 0.39                                            | 0.41                          |

# Peak 492

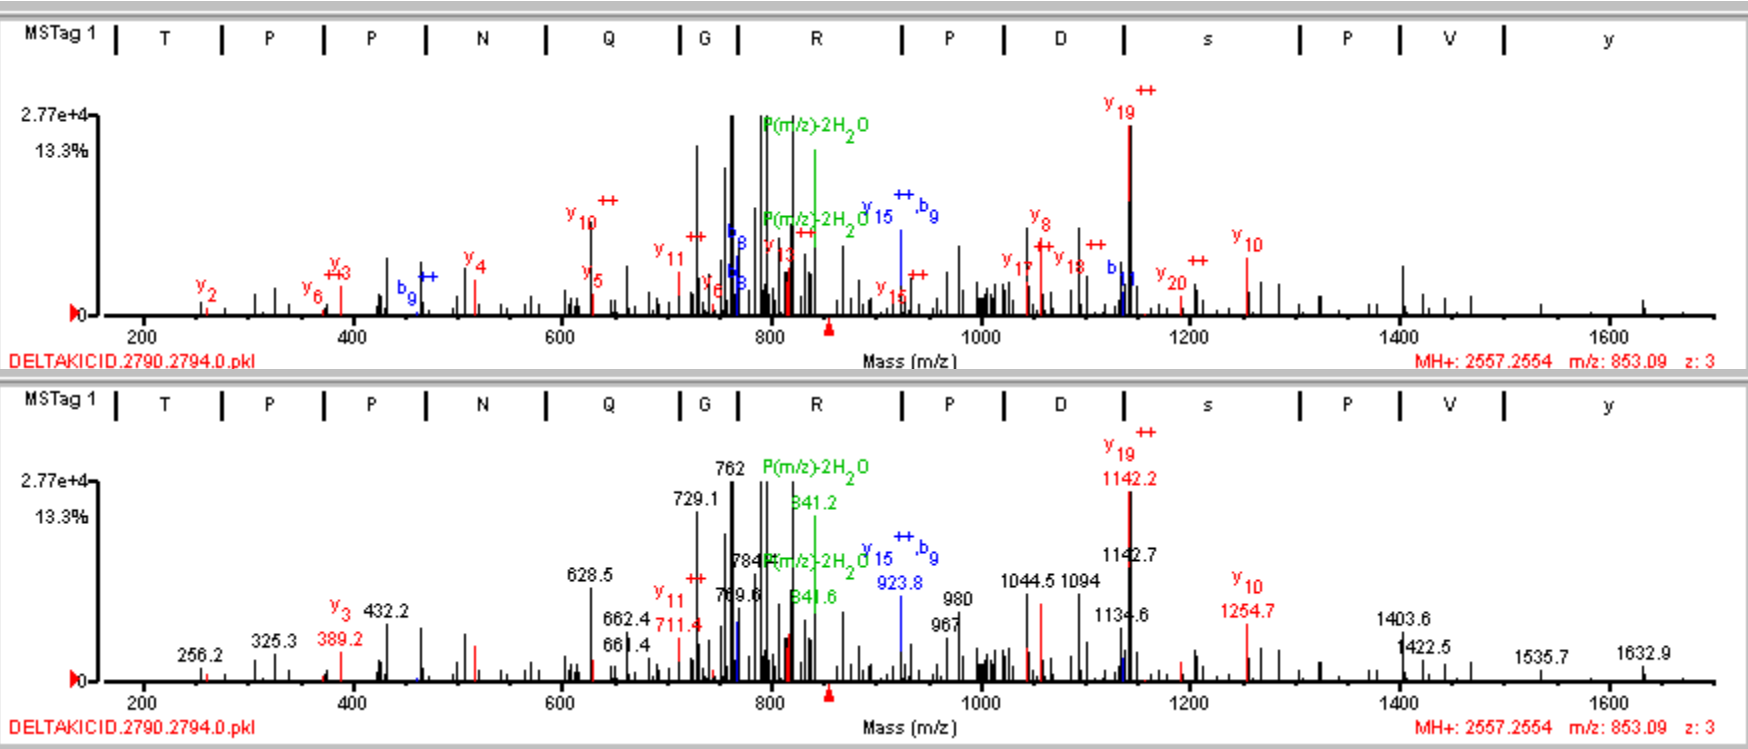

| Rank                    | Score             | SPI (%) | BCS    | # Unmatched Ions   | Variable sites     | Sequence                                            | MH <sup>+</sup> Calculated (Da) | MH <sup>+</sup> Error (Da) | MH <sup>+</sup> Error (ppm) | Protein MW/pI (Da) | Species      | Accession #              | MS-Digest Index #    | Protein Name                     |                   |                |                   |                   |                 |
|-------------------------|-------------------|---------|--------|--------------------|--------------------|-----------------------------------------------------|---------------------------------|----------------------------|-----------------------------|--------------------|--------------|--------------------------|----------------------|----------------------------------|-------------------|----------------|-------------------|-------------------|-----------------|
| 1                       | 12.08             | 74.7    | 8      | 6/19               | Y243y S240s        | (R) A T/T/P/P/N Q/G\R P D s/P V/Y A N L Q E\L K (I) | 2396.22                         | 161.0350                   | 431.1                       | 96254.9/7.29       | Homo sapiens | <a href="#">26986534</a> | <a href="#">7889</a> | Rho GTPase activating protein 12 |                   |                |                   |                   |                 |
| Fragment-ion (m/z)      | 627.91            | 729.09  | 756.70 | 761.95             | 767.10             | 784.14                                              | 789.64                          | 795.82                     | 814.44                      | 818.05             | 820.38       | 832.37                   | 836.57               | 923.41                           | 1044.46           | 1058.59        | 1094.05           | 1142.21           | 1254.73         |
| Frac. Inten. (% of TIC) | 3.66              | 4.48    | 2.77   | 37.71              | 1.59               | 3.93                                                | 10.55                           | 8.60                       | 0.06                        | 2.40               | 0.14         | 1.72                     | 1.80                 | 3.35                             | 2.68              | 1.70           | 2.01              | 9.22              | 1.62            |
| Rel. Inten. (% of BP)   | 9.71              | 11.87   | 7.35   | 100.00             | 4.23               | 10.43                                               | 27.98                           | 22.80                      | 0.15                        | 6.38               | 0.37         | 4.56                     | 4.78                 | 8.88                             | 7.10              | 4.51           | 5.32              | 24.45             | 4.31            |
| Score                   | 1.00              | -0.12   | -0.07  | 1.00               | 1.00               | -0.10                                               | -0.28                           | 1.00                       | 0.25                        | 1.00               | 1.50         | -0.05                    | -0.05                | 1.00                             | 1.00              | 1.00           | 1.00              | 1.00              | 1.00            |
| Ion-type                | y <sup>++10</sup> |         |        | y <sup>+++19</sup> | b <sub>8</sub>     |                                                     |                                 | y <sup>+++20</sup>         | st                          | y <sup>++13</sup>  | sty          |                          |                      | b <sub>9</sub>                   | y <sup>++17</sup> | y <sub>8</sub> | y <sup>++18</sup> | y <sup>++19</sup> | y <sub>10</sub> |
| Delta Da                | 0.10              |         |        | 0.27               | -0.27              |                                                     |                                 | 0.46                       | 0.38                        | 0.70               | 0.32         |                          |                      | -0.06                            | -0.50             | 0.10           | 0.56              | 0.20              | 0.12            |
|                         |                   |         |        |                    | b <sup>+++20</sup> |                                                     |                                 |                            |                             |                    |              |                          |                      | y <sup>++15</sup>                |                   |                |                   |                   |                 |
|                         |                   |         |        |                    | 0.77               |                                                     |                                 |                            |                             |                    |              |                          |                      | -0.50                            |                   |                |                   |                   |                 |

# Peak 493

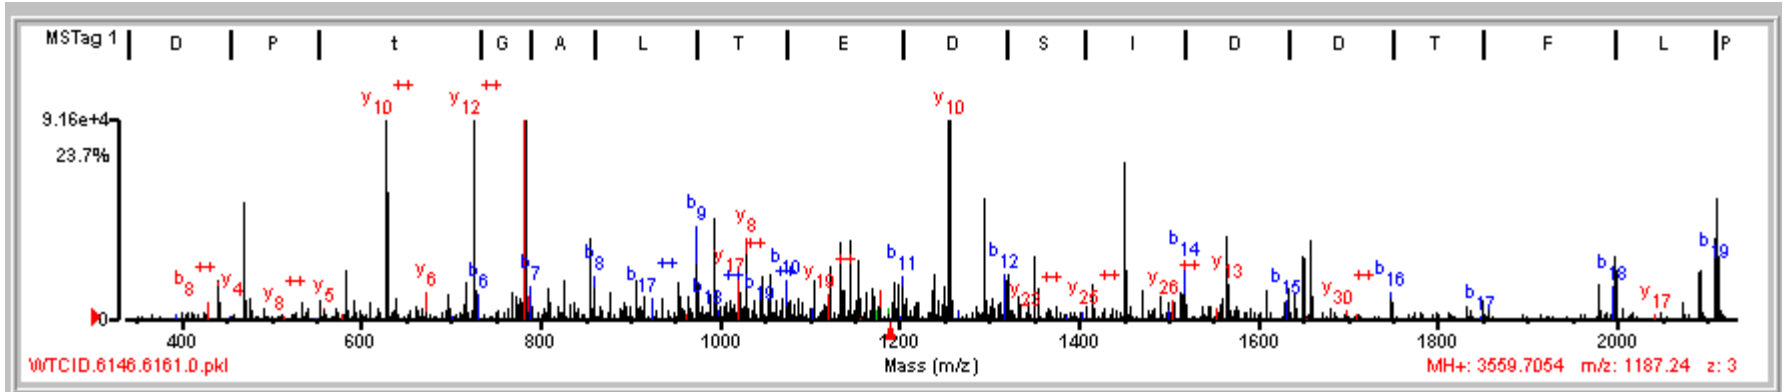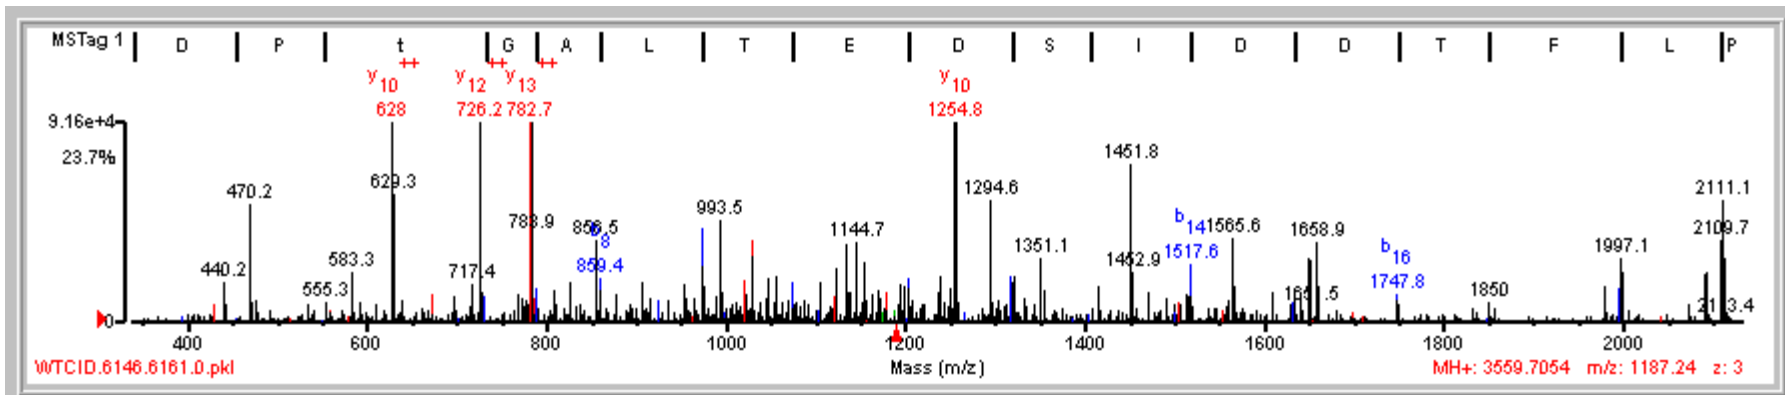

| Rank                    | Score  | SPI (%)           | BCS               | # Unmatched Ions  | Variable sites | Sequence                                                                                | MH+ Calculated (Da) | MH+ Error (Da) | MH+ Error (ppm)   | Protein MW/pl (Da) | Species      | Accession # | MS-Digest Index # | Protein Name                               |                   |                 |         |                 |                   |                                                |                   |         |         |         |         |
|-------------------------|--------|-------------------|-------------------|-------------------|----------------|-----------------------------------------------------------------------------------------|---------------------|----------------|-------------------|--------------------|--------------|-------------|-------------------|--------------------------------------------|-------------------|-----------------|---------|-----------------|-------------------|------------------------------------------------|-------------------|---------|---------|---------|---------|
| 1                       | 14.32  | 78.5              | 10                | 9/25              | T1074t Y1092y  | (R) Y S S D P t G A L I T E D / S I I D D T F I L / P V / P E / y I N Q \ S V \ P K (R) | 3398.62             | 161.0892       | 324.9             | 134278.3/6.26      | Homo sapiens | 29725609    | 2364              | epidermal growth factor receptor isoform a |                   |                 |         |                 |                   |                                                |                   |         |         |         |         |
| Fragment-ion (m/z)      | 470.24 | 628.01            | 726.15            | 782.71            | 972.61         | 993.53                                                                                  | 1021.31             | 1028.70        | 1122.13           | 1135.21            | 1144.73      | 1153.44     | 1202.85           | 1254.76                                    | 1294.65           | 1451.15         | 1451.79 | 1517.58         | 1565.65           | 1649.66                                        | 1658.89           | 1996.47 | 2092.27 | 2109.72 | 2111.10 |
| Frac. Inten. (% of TIC) | 1.80   | 18.27             | 8.54              | 10.79             | 2.22           | 2.45                                                                                    | 1.60                | 2.51           | 0.04              | 1.92               | 1.89         | 1.80        | 1.43              | 18.38                                      | 2.92              | 1.63            | 4.05    | 1.48            | 2.29              | 2.45                                           | 1.68              | 2.01    | 1.60    | 2.20    | 4.04    |
| Rel. Inten. (% of BP)   | 9.81   | 99.38             | 46.48             | 58.71             | 12.10          | 13.32                                                                                   | 8.71                | 13.68          | 0.21              | 10.43              | 10.29        | 9.77        | 7.77              | 100.00                                     | 15.91             | 8.89            | 22.04   | 8.02            | 12.46             | 13.31                                          | 9.13              | 10.94   | 8.73    | 11.96   | 21.97   |
| Score                   | -0.10  | 1.00              | 1.00              | 1.00              | 1.00           | -0.13                                                                                   | 1.00                | 1.00           | 1.00              | -0.10              | -0.10        | -0.10       | 1.00              | 1.00                                       | 1.00              | -0.22           | 1.00    | 1.00            | 0.50              | 1.00                                           | 1.00              | 1.00    | -0.09   | -0.12   | -0.22   |
| Ion-type                |        | y <sup>++10</sup> | y <sup>++12</sup> | y <sup>++13</sup> | b <sub>9</sub> |                                                                                         | y <sup>++17</sup>   | y <sub>8</sub> | y <sup>++18</sup> |                    |              |             | b <sub>11</sub>   | y <sub>10</sub>                            | y <sup>++22</sup> | y <sub>12</sub> |         | b <sub>14</sub> | b <sup>++27</sup> | b <sup>++29</sup> H <sub>2</sub> O             | b <sup>++28</sup> |         |         |         |         |
| Delta Da                |        | 0.22              | 0.30              | 0.32              | 0.24           |                                                                                         | -0.17               | 0.22           | 0.59              | 1.00               | st           | 0.59        | 0.39              | 0.18                                       | 0.55              | 0.45            |         | -0.02           | 0.50              | 0.47                                           | 0.69              | 0.70    |         |         |         |
|                         |        |                   |                   |                   |                |                                                                                         |                     |                |                   |                    |              |             |                   |                                            |                   |                 |         |                 |                   | b <sub>16</sub> H <sub>3</sub> PO <sub>4</sub> | -0.02             |         |         |         |         |



# Peak 495

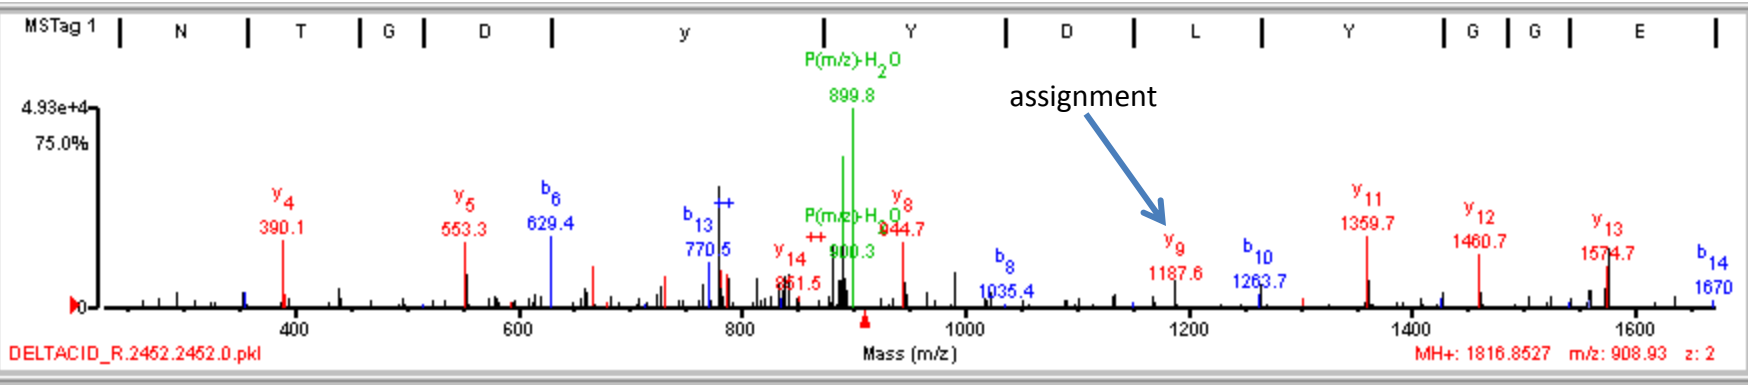

| Rank                    | Score | SPI (%)        | BCS            | # Unmatched Ions | Variable sites | Sequence                              | MH <sup>+</sup> Calculated (Da)                 | MH <sup>+</sup> Error (Da) | MH <sup>+</sup> Error (ppm)   | Protein MW/pi (Da) | Species        | Accession #              | MS-Digest Index #    | Protein Name                                       |                 |         |
|-------------------------|-------|----------------|----------------|------------------|----------------|---------------------------------------|-------------------------------------------------|----------------------------|-------------------------------|--------------------|----------------|--------------------------|----------------------|----------------------------------------------------|-----------------|---------|
| 1                       | 11.38 | 86.3           | 10             | 2/15             | Y62y           | (K) I Q/N/T/G D Y/Y/D/L/Y/G GVE K (F) | 1735.78                                         | 81.0718                    | 608.4                         | 68011.2/6.87       | Homo sapiens   | <a href="#">33356177</a> | <a href="#">4991</a> | protein tyrosine phosphatase, non-receptor type 11 |                 |         |
| Fragment-ion (m/z)      |       | 390.13         | 553.31         | 629.43           | 666.45         | 770.54                                | 779.20                                          | 781.43                     | 787.78                        | 882.24             | 944.67         | 1187.55                  | 1359.72              | 1460.66                                            | 1574.66         | 1575.68 |
| Frac. Inten. (% of TIC) |       | 7.02           | 8.45           | 5.74             | 3.61           | 5.76                                  | 12.31                                           | 5.74                       | 5.15                          | 5.92               | 8.29           | 4.64                     | 8.90                 | 7.28                                               | 3.38            | 7.82    |
| Rel. Inten. (% of BP)   |       | 56.97          | 68.63          | 46.60            | 29.35          | 46.74                                 | 100.00                                          | 46.59                      | 41.78                         | 48.07              | 67.35          | 37.66                    | 72.29                | 59.12                                              | 27.41           | 63.47   |
| Score                   |       | 1.00           | 1.00           | 1.00             | 1.00           | 1.00                                  | 0.50                                            | 1.00                       | 1.00                          | -0.48              | 1.00           | 1.00                     | 1.00                 | 1.00                                               | 1.00            | -0.63   |
| Ion-type                |       | Y <sub>4</sub> | Y <sub>5</sub> | b <sub>6</sub>   | Y <sub>6</sub> | b <sup>++</sup> <sub>13</sub>         | y <sup>++</sup> <sub>13</sub> -H <sub>2</sub> O | Y <sub>7</sub>             | y <sup>++</sup> <sub>13</sub> |                    | Y <sub>8</sub> | Y <sub>8</sub>           | Y <sub>11</sub>      | Y <sub>12</sub>                                    | Y <sub>13</sub> |         |
| Delta Da                |       | -0.07          | 0.05           | 0.14             | 0.10           | -0.26                                 | 0.40                                            | 0.06                       | -0.03                         |                    | 0.23           | 0.08                     | 0.21                 | 0.10                                               | 0.06            |         |

# Peak 496

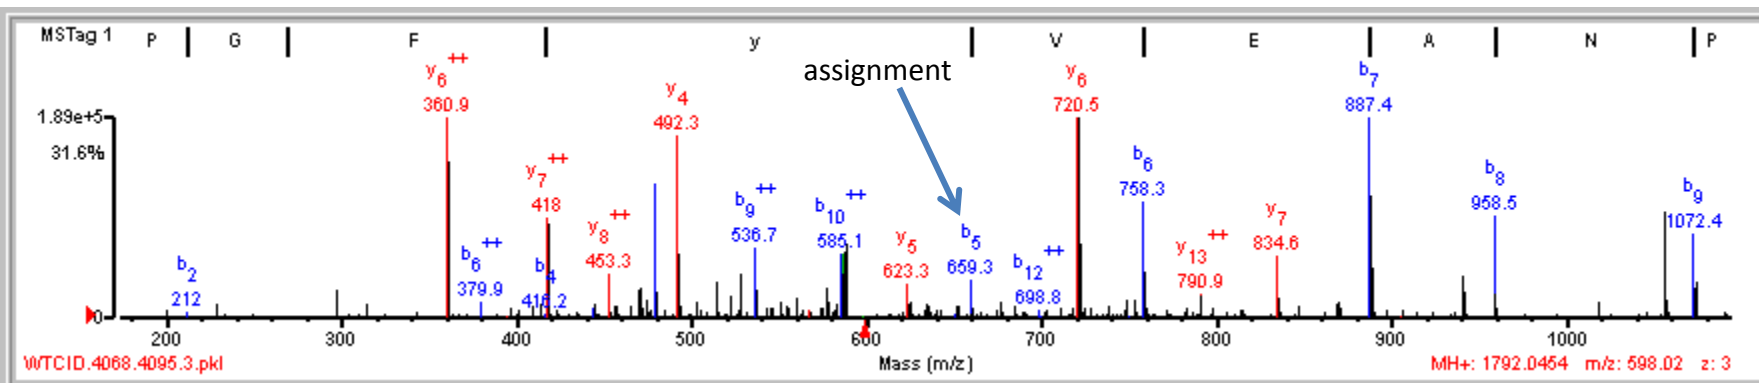

| Rank | Score | SPI (%) | BCS | # Unmatched Ions | Variable sites | Sequence                                            | MH <sup>+</sup> Calculated (Da) | MH <sup>+</sup> Error (Da) | MH <sup>+</sup> Error (ppm) | Protein MW/pl (Da) | Species      | Accession #              | MS-Digest Index #     | Protein Name                      |
|------|-------|---------|-----|------------------|----------------|-----------------------------------------------------|---------------------------------|----------------------------|-----------------------------|--------------------|--------------|--------------------------|-----------------------|-----------------------------------|
| 1    | 18.30 | 95.6    | 8   | 3/24             | Y783y          | (R) N P / G F Y V \ E   A   N   P / M / P T F K (C) | 1711.81                         | 80.2306                    | 147.5                       | 148532.9/5.73      | Homo sapiens | <a href="#">33598946</a> | <a href="#">14027</a> | phospholipase C gamma 1 isoform b |
| 1    | 18.30 | 95.6    | 8   | 3/24             | Y783y          | (R) N P / G F Y V \ E   A   N   P / M / P T F K (C) | 1711.81                         | 80.2306                    | 147.5                       | 148661.0/5.73      | Homo sapiens | <a href="#">33598948</a> | <a href="#">31704</a> | phospholipase C gamma 1 isoform a |

  

| Fragment-ion (m/z)      | 360.87           | 417.99           | 453.29           | 470.62                              | 474.23                           | 479.75           | 492.29         | 514.23 | 528.30                              | 536.73           | 577.81 | 588.77 | 623.33         | 659.28         | 720.46         | 758.32         | 790.87            | 834.57         | 869.14                           | 887.35         | 940.59                          | 958.46         | 1055.47                         | 1072.45        |
|-------------------------|------------------|------------------|------------------|-------------------------------------|----------------------------------|------------------|----------------|--------|-------------------------------------|------------------|--------|--------|----------------|----------------|----------------|----------------|-------------------|----------------|----------------------------------|----------------|---------------------------------|----------------|---------------------------------|----------------|
| Frac. Inten. (% of TIC) | 13.73            | 5.43             | 1.15             | 1.93                                | 0.96                             | 3.80             | 5.83           | 1.45   | 1.97                                | 2.74             | 1.17   | 1.78   | 1.72           | 1.51           | 22.51          | 4.10           | 1.12              | 2.33           | 0.98                             | 10.18          | 2.12                            | 3.25           | 4.45                            | 3.79           |
| Rel. Inten. (% of BP)   | 60.98            | 24.11            | 5.12             | 8.57                                | 4.28                             | 16.90            | 25.91          | 6.44   | 8.75                                | 12.15            | 5.19   | 7.90   | 7.63           | 6.72           | 100.00         | 18.22          | 4.96              | 10.37          | 4.36                             | 45.22          | 9.41                            | 14.43          | 19.75                           | 16.83          |
| Score                   | 1.00             | 1.00             | 1.00             | 0.50                                | 0.50                             | 1.00             | 1.00           | -0.06  | 1.00                                | 1.00             | -0.05  | -0.08  | 1.00           | 1.00           | 1.00           | 1.00           | 1.00              | 1.00           | 0.50                             | 1.00           | 0.50                            | 1.00           | 0.50                            | 1.00           |
| Ion-type                | y <sup>++6</sup> | y <sup>++7</sup> | y <sup>++8</sup> | b <sup>+++8</sup> -H <sub>2</sub> O | y <sub>4</sub> -H <sub>2</sub> O | b <sup>++8</sup> | y <sub>4</sub> |        | b <sup>+++9</sup> -H <sub>2</sub> O | b <sup>++9</sup> |        |        | y <sub>5</sub> | b <sub>5</sub> | y <sub>6</sub> | b <sub>6</sub> | y <sup>++13</sup> | y <sub>7</sub> | b <sub>7</sub> -H <sub>2</sub> O | b <sub>7</sub> | b <sub>8</sub> -NH <sub>3</sub> | b <sub>8</sub> | b <sub>9</sub> -NH <sub>3</sub> | b <sub>9</sub> |
| Delta Da                | 0.18             | 0.28             | 0.06             | -0.06                               | -0.04                            | 0.06             | 0.01           |        | 0.59                                | 0.02             |        |        | 0.01           | 0.06           | 0.09           | 0.03           | 0.02              | 0.15           | -0.18                            | 0.02           | -0.75                           | 0.09           | 0.08                            | 0.04           |

# Peak 497

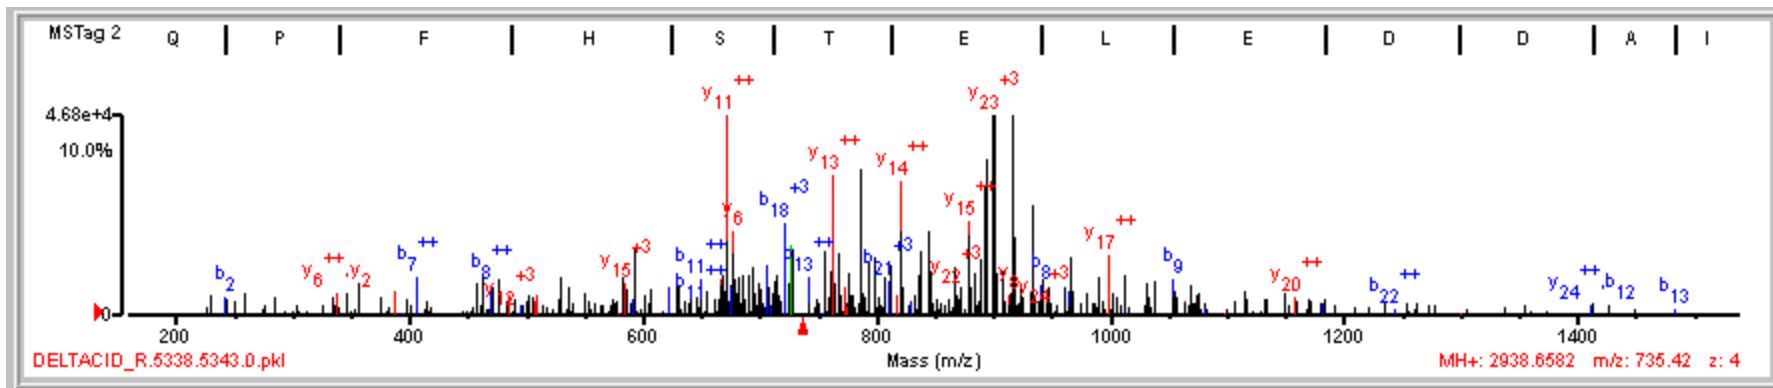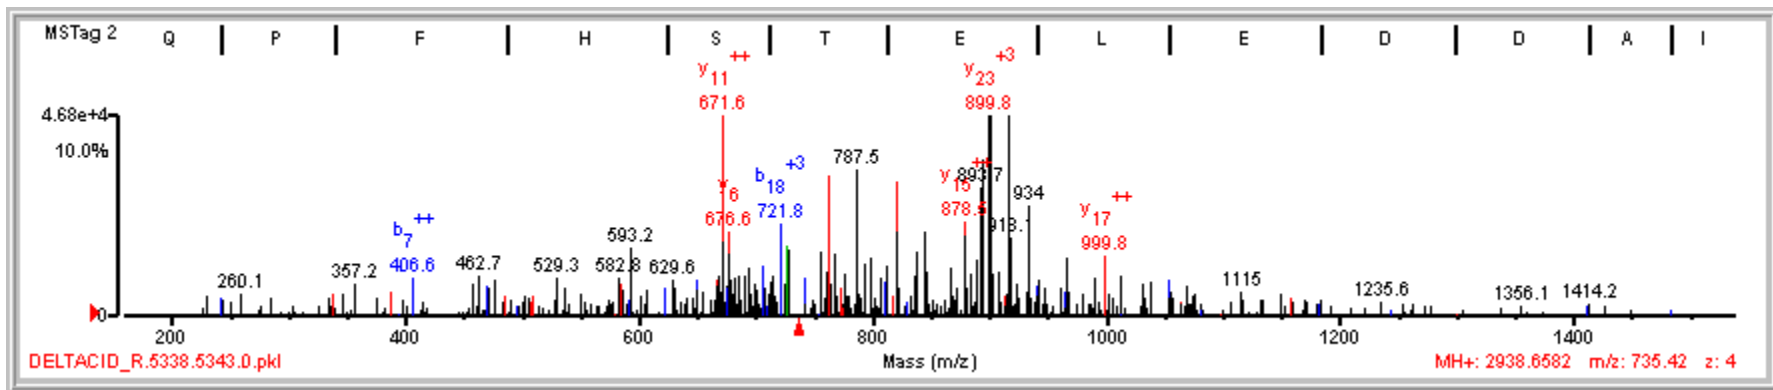

| Rank                    | Score                        | SPI (%)                        | BCS                            | # Unmatched Ions              | Variable sites                 | Sequence                                                    | MH <sup>+</sup> Calculated (Da) | MH <sup>+</sup> Error (Da)     | MH <sup>+</sup> Error (ppm)    | Protein MW/pl (Da) | Species                        | Accession #              | MS-Digest Index #             | Protein Name                                             |        |                               |                               |        |        |                                |        |        |        |                |
|-------------------------|------------------------------|--------------------------------|--------------------------------|-------------------------------|--------------------------------|-------------------------------------------------------------|---------------------------------|--------------------------------|--------------------------------|--------------------|--------------------------------|--------------------------|-------------------------------|----------------------------------------------------------|--------|-------------------------------|-------------------------------|--------|--------|--------------------------------|--------|--------|--------|----------------|
| 1                       | 14.51                        | 78.3                           | 11                             | 9/24                          | Y545y                          | (R) L Q/P F H S T E L E/D/D I A I/Y S V H V/P A G L Y R (I) | 2857.42                         | 81.2426                        | 434.3                          | 84341.4/6.33       | Homo sapiens                   | <a href="#">41393573</a> | <a href="#">20413</a>         | G protein-coupled receptor kinase interactor 1 isoform 2 |        |                               |                               |        |        |                                |        |        |        |                |
| Fragment-ion (m/z)      | 470.65                       | 629.64                         | 667.35                         | 671.64                        | 676.55                         | 694.47                                                      | 707.06                          | 721.84                         | 763.52                         | 768.01             | 787.47                         | 811.96                   | 821.07                        | 844.21                                                   | 845.88 | 878.52                        | 878.93                        | 893.71 | 894.13 | 899.80                         | 917.53 | 933.96 | 967.31 | 1053.12        |
| Frac. Inten. (% of TIC) | 1.37                         | 1.33                           | 1.32                           | 6.58                          | 3.09                           | 1.71                                                        | 1.57                            | 1.44                           | 3.36                           | 2.10               | 2.64                           | 1.20                     | 4.13                          | 1.81                                                     | 1.25   | 1.48                          | 3.10                          | 2.00   | 4.51   | 44.31                          | 4.60   | 2.37   | 1.34   | 1.40           |
| Rel. Inten. (% of BP)   | 3.08                         | 3.00                           | 2.98                           | 14.86                         | 6.98                           | 3.85                                                        | 3.54                            | 3.25                           | 7.59                           | 4.73               | 5.96                           | 2.71                     | 9.33                          | 4.08                                                     | 2.82   | 3.33                          | 7.00                          | 4.51   | 10.18  | 100.00                         | 10.38  | 5.35   | 3.03   | 3.16           |
| Score                   | 1.00                         | 1.00                           | 1.00                           | 1.00                          | 1.00                           | -0.04                                                       | 1.00                            | 1.00                           | 1.00                           | -0.05              | 1.00                           | 1.00                     | 1.00                          | -0.04                                                    | -0.03  | 1.00                          | 1.00                          | -0.05  | -0.10  | 1.00                           | -0.10  | -0.05  | -0.03  | 1.00           |
| Ion-type                | b <sup>++</sup> <sub>8</sub> | y <sup>+++</sup> <sub>16</sub> | y <sup>+++</sup> <sub>17</sub> | y <sup>++</sup> <sub>11</sub> | b <sup>+++</sup> <sub>17</sub> |                                                             | b <sup>+++</sup> <sub>12</sub>  | b <sup>+++</sup> <sub>18</sub> | y <sup>+++</sup> <sub>13</sub> |                    | b <sup>+++</sup> <sub>20</sub> |                          | y <sup>++</sup> <sub>14</sub> |                                                          |        | y <sup>++</sup> <sub>15</sub> | y <sup>++</sup> <sub>15</sub> |        |        | y <sup>+++</sup> <sub>23</sub> |        |        |        | b <sub>9</sub> |
| Delta Da                | -0.08                        | 0.68                           | 0.70                           | 0.32                          | 0.58                           |                                                             | 0.24                            | 0.19                           | 0.14                           |                    | 0.44                           | 0.55                     | 0.17                          |                                                          | 0.11   | 0.52                          |                               |        | 0.38   |                                |        |        |        | -0.42          |

# Peak 498

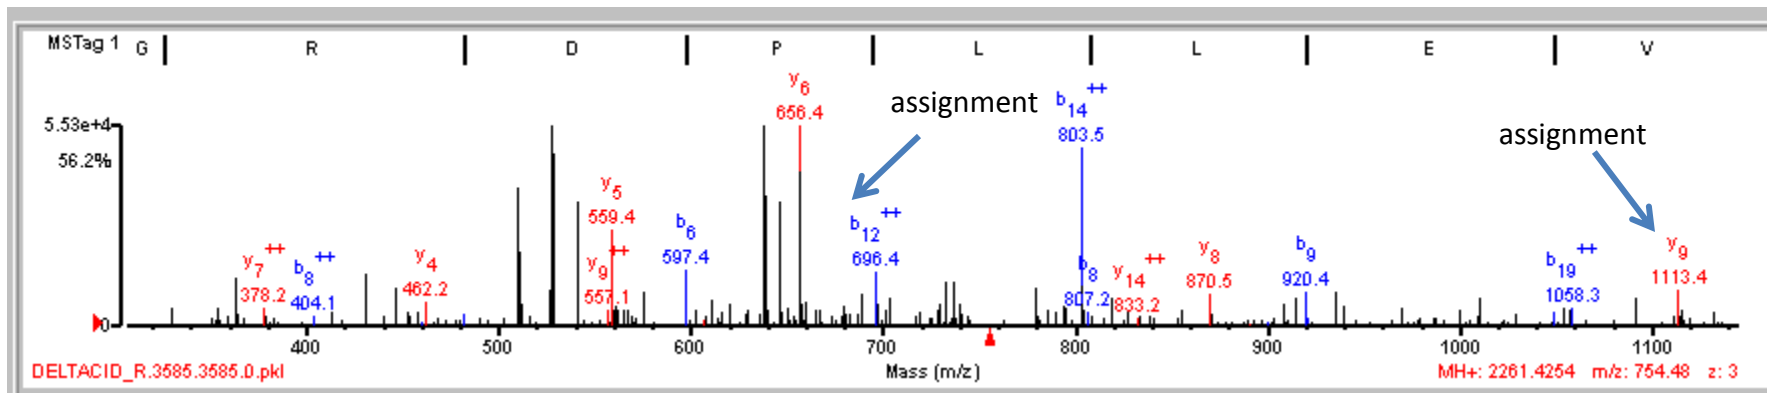

## Search Results

| Rank                    | Score  | SPI (%) | BCS    | # Unmatched Ions | Variable sites                   | Sequence                                         | MH <sup>+</sup> Calculated (Da) | MH <sup>+</sup> Error (Da) | MH <sup>+</sup> Error (ppm)      | Protein MW/pI (Da)             | Species        | Accession #                    | MS-Digest Index #              | Protein Name                             |                                  |                |                                                  |                                |                |                |                |
|-------------------------|--------|---------|--------|------------------|----------------------------------|--------------------------------------------------|---------------------------------|----------------------------|----------------------------------|--------------------------------|----------------|--------------------------------|--------------------------------|------------------------------------------|----------------------------------|----------------|--------------------------------------------------|--------------------------------|----------------|----------------|----------------|
| 1                       | 11.46  | 70.5    | 8      | 5/21             | Y287y                            | (K)G P N G/R D\ P L/L\ E V Y D V P/P S V E R (G) | 2181.12                         | 80.3068                    | 150.6                            | 93372.3/5.41                   | Homo sapiens   | <a href="#">44662836</a>       | <a href="#">2165</a>           | breast cancer anti-estrogen resistance 1 |                                  |                |                                                  |                                |                |                |                |
| Fragment-ion (m/z)      | 363.13 | 430.66  | 510.46 | 528.39           | 541.44                           | 559.44                                           | 575.44                          | 597.41                     | 638.43                           | 646.32                         | 656.41         | 696.38                         | 728.51                         | 732.70                                   | 737.35                           | 779.72         | 794.49                                           | 803.47                         | 870.46         | 920.42         | 1113.42        |
| Frac. Inten. (% of TIC) | 2.00   | 1.86    | 7.66   | 16.46            | 4.66                             | 3.69                                             | 1.48                            | 1.86                       | 16.36                            | 4.91                           | 14.36          | 2.76                           | 1.36                           | 1.49                                     | 2.05                             | 1.87           | 1.36                                             | 7.73                           | 1.51           | 1.49           | 3.06           |
| Rel. Inten. (% of BP)   | 12.16  | 11.31   | 46.52  | 100.00           | 28.28                            | 22.42                                            | 9.01                            | 11.30                      | 99.40                            | 29.82                          | 87.22          | 16.75                          | 8.28                           | 9.07                                     | 12.47                            | 11.34          | 8.29                                             | 46.98                          | 9.18           | 9.03           | 18.57          |
| Score                   | -0.12  | -0.11   | -0.47  | -1.00            | 0.50                             | 1.00                                             | 1.00                            | 1.00                       | 0.50                             | 1.00                           | 1.00           | 1.00                           | 1.00                           | -0.09                                    | 0.50                             | 0.25           | 0.50                                             | 1.00                           | 1.00           | 1.00           | 1.00           |
| Ion-type                |        |         |        |                  | y <sub>5</sub> -H <sub>2</sub> O | y <sub>5</sub>                                   | b <sup>+++</sup> <sub>11</sub>  | b <sub>6</sub>             | y <sub>6</sub> -H <sub>2</sub> O | y <sup>+++</sup> <sub>16</sub> | y <sub>6</sub> | b <sup>+++</sup> <sub>12</sub> | y <sup>+++</sup> <sub>12</sub> |                                          | y <sub>7</sub> -H <sub>2</sub> O | a <sub>8</sub> | b <sup>+++</sup> <sub>14</sub> -H <sub>2</sub> O | b <sup>+++</sup> <sub>14</sub> | y <sub>8</sub> | b <sub>9</sub> | y <sub>9</sub> |
| Delta Da                |        |         |        |                  | 0.14                             | 0.13                                             | 0.63                            | 0.14                       | 0.08                             | 0.33                           | 0.05           | 0.06                           | 0.67                           |                                          | -0.07                            | 0.30           | 0.13                                             | 0.10                           | 0.00           | -0.07          | -0.07          |



# Peak 500

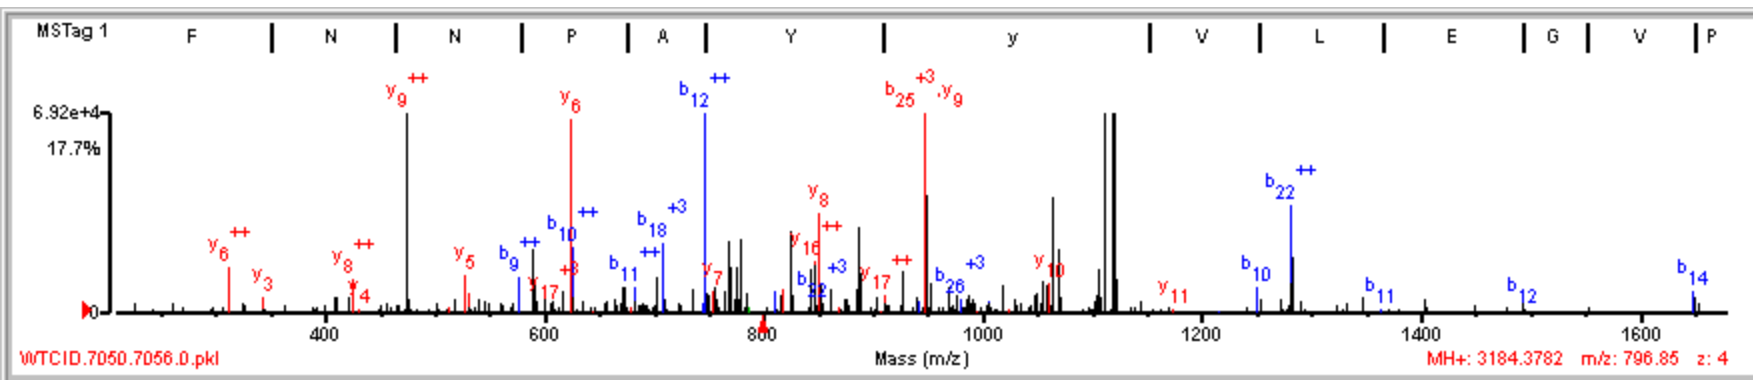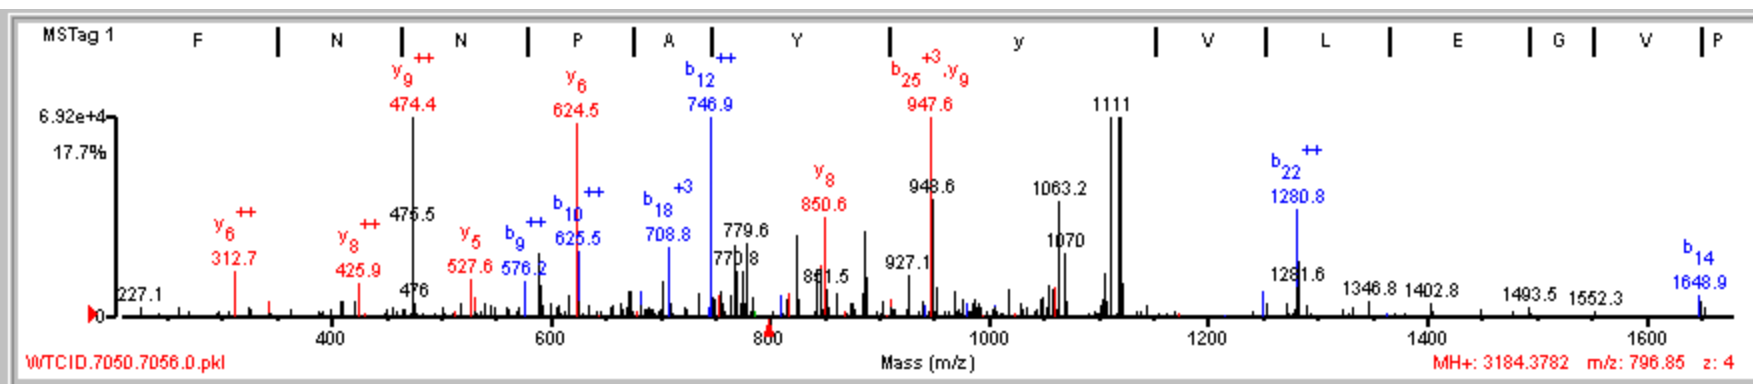

| Fragment-ion (m/z)     | 474.41           | 589.49 | 624.47         | 701.90 | 708.76             | 746.89            | 768.90            | 775.87            | 779.31             | 815.88                              | 825.51            | 846.54            | 850.55         | 887.68 | 927.14 | 947.56         | 1059.45 | 1063.25           | 1070.05 | 1105.63 | 1110.97 | 1119.54 | 1280.84           | 1648.87           |                 |
|------------------------|------------------|--------|----------------|--------|--------------------|-------------------|-------------------|-------------------|--------------------|-------------------------------------|-------------------|-------------------|----------------|--------|--------|----------------|---------|-------------------|---------|---------|---------|---------|-------------------|-------------------|-----------------|
| Frac. Inten.(% of TIC) | 24.23            | 1.31   | 4.35           | 1.06   | 1.32               | 4.32              | 1.11              | 1.27              | 1.97               | 0.87                                | 1.61              | 1.66              | 2.56           | 2.30   | 0.89   | 6.23           | 1.01    | 2.49              | 1.40    | 1.75    | 5.24    | 26.98   | 3.12              | 0.94              |                 |
| Rel. Inten.(% of BP)   | 89.79            | 4.85   | 16.13          | 3.94   | 4.90               | 16.03             | 4.10              | 4.70              | 7.30               | 3.24                                | 5.96              | 6.16              | 9.50           | 8.53   | 3.29   | 23.10          | 3.76    | 9.22              | 5.18    | 6.49    | 19.41   | 100.00  | 11.56             | 3.48              |                 |
| Score                  | 1.00             | -0.05  | 1.00           | -0.04  | 1.00               | 1.00              | 1.00              | 1.00              | 1.00               | 0.50                                | 1.00              | 1.00              | 1.00           | -0.09  | -0.03  | 1.00           | -0.04   | 1.00              | 1.00    | -0.05   | -0.06   | -0.19   | 1.00              | 1.00              |                 |
| Ion-type               | y <sup>++9</sup> |        | y <sub>6</sub> |        | b <sup>+++18</sup> | b <sup>++12</sup> | y <sup>++14</sup> | b <sup>++13</sup> | b <sup>+++20</sup> | b <sup>++14</sup> -H <sub>2</sub> O | b <sup>++14</sup> | y <sup>++16</sup> | y <sub>8</sub> |        |        | y <sub>9</sub> |         | b <sup>++18</sup> |         |         |         |         | b <sup>++19</sup> | b <sup>++22</sup> | b <sub>14</sub> |
| Delta Da               | 0.16             |        | 0.12           |        | 0.10               | 0.08              | 0.48              | 0.55              | 0.61               | 0.03                                | 0.65              | 0.07              | 0.11           |        |        | 0.07           |         | 0.77              |         |         |         | 0.52    | 0.24              | 0.17              |                 |

# Peak 503

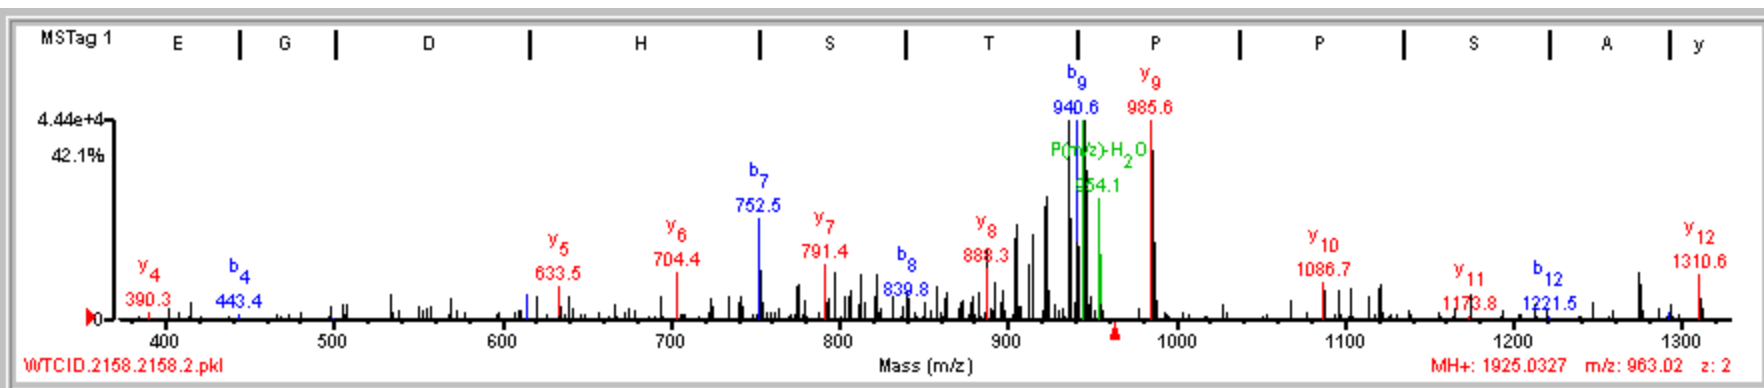

| Rank | Score | SPI (%) | BCS | # Unmatched Ions | Variable sites | Sequence                                    | MH <sup>+</sup> Calculated (Da) | MH <sup>+</sup> Error (Da) | MH <sup>+</sup> Error (ppm) | Protein MW/pi (Da) | Species      | Accession #              | MS-Digest Index #     | Protein Name         |
|------|-------|---------|-----|------------------|----------------|---------------------------------------------|---------------------------------|----------------------------|-----------------------------|--------------------|--------------|--------------------------|-----------------------|----------------------|
| 1    | 12.27 | 70.8    | 10  | 7/23             | Y24y           | (K) L S/L E G D/H\S/T P/P/S/A Y G\S\Y K (A) | 1844.90                         | 80.1302                    | 85.1                        | 38604.2/7.58       | Homo sapiens | <a href="#">4757756</a>  | <a href="#">3802</a>  | annexin A2 isoform 2 |
| 1    | 12.27 | 70.8    | 10  | 7/23             | Y42y           | (K) L S/L E G D/H\S/T P/P/S/A Y G\S\Y K (A) | 1844.90                         | 80.1302                    | 85.1                        | 40411.4/8.53       | Homo sapiens | <a href="#">50845388</a> | <a href="#">12086</a> | annexin A2 isoform 1 |
| 1    | 12.27 | 70.8    | 10  | 7/23             | Y24y           | (K) L S/L E G D/H\S/T P/P/S/A Y G\S\Y K (A) | 1844.90                         | 80.1302                    | 85.1                        | 38604.2/7.58       | Homo sapiens | <a href="#">50845386</a> | <a href="#">17586</a> | annexin A2 isoform 2 |

| Fragment-ion (m/z)      | 704.39         | 724.46         | 752.53         | 775.56 | 791.45         | 797.54                        | 822.45 | 840.56                        | 863.31                        | 878.50 | 887.64         | 896.72 | 904.76 | 912.32         | 914.65 | 922.59                           | 936.55 | 940.56         | 985.58         | 1086.66 | 1120.52 | 1274.77                           | 1310.62         |
|-------------------------|----------------|----------------|----------------|--------|----------------|-------------------------------|--------|-------------------------------|-------------------------------|--------|----------------|--------|--------|----------------|--------|----------------------------------|--------|----------------|----------------|---------|---------|-----------------------------------|-----------------|
| Frac. Inten. (% of TIC) | 1.55           | 1.69           | 5.50           | 2.34   | 3.55           | 1.58                          | 2.23   | 1.71                          | 1.59                          | 1.63   | 5.00           | 2.42   | 7.56   | 1.81           | 0.13   | 9.23                             | 10.49  | 12.42          | 16.93          | 2.17    | 2.54    | 3.11                              | 2.84            |
| Rel. Inten. (% of BP)   | 9.13           | 9.97           | 32.51          | 13.82  | 20.96          | 9.32                          | 13.15  | 10.08                         | 9.38                          | 9.63   | 29.52          | 14.28  | 44.69  | 10.69          | 0.74   | 54.52                            | 61.95  | 73.35          | 100.00         | 12.84   | 15.02   | 18.39                             | 16.76           |
| Score                   | 1.00           | 0.25           | 1.00           | -0.14  | 1.00           | 1.00                          | -0.13  | 1.00                          | 1.00                          | -0.10  | 1.00           | -0.14  | -0.45  | 0.25           | 1.50   | 0.50                             | -0.62  | 1.00           | 1.00           | 1.00    | -0.15   | 0.50                              | 1.00            |
| Ion-type                | y <sub>6</sub> | a <sub>7</sub> | b <sub>7</sub> |        | y <sub>7</sub> | b <sup>++</sup> <sub>15</sub> |        | b <sup>++</sup> <sub>16</sub> | y <sup>++</sup> <sub>16</sub> |        | y <sub>8</sub> |        |        | a <sub>9</sub> | sty    | b <sub>9</sub> -H <sub>2</sub> O |        | b <sub>9</sub> | y <sub>9</sub> |         |         | b <sub>13</sub> -H <sub>2</sub> O | y <sub>12</sub> |
| Delta Da                | 0.09           | 0.10           | 0.17           |        | 0.12           | 0.70                          |        | 0.21                          | 0.43                          |        | -0.75          |        |        | -0.12          | 0.70   | 0.16                             |        | 0.12           | 0.14           | 0.17    |         | 0.17                              | 0.04            |

# Peak 504

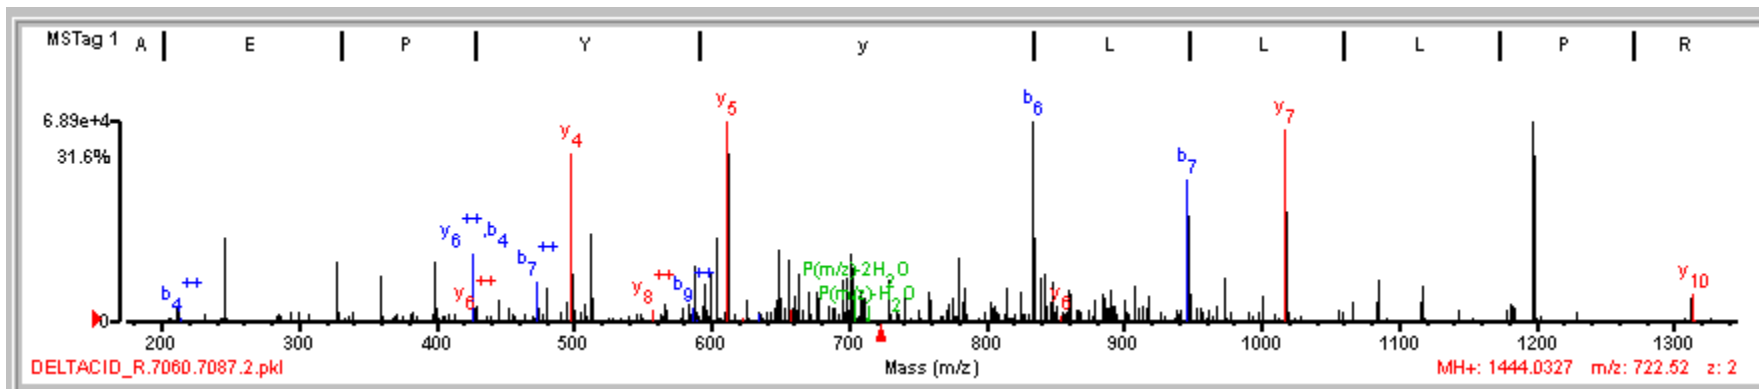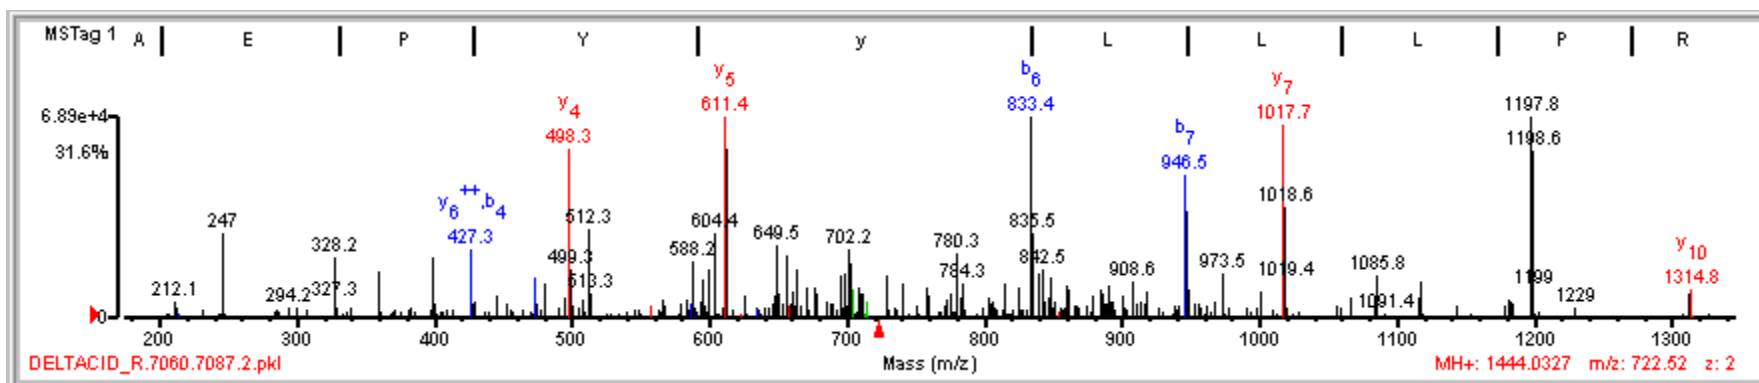

1 7.97 70.6 4 11/22 Y36y (R) E/A E P|Y/y|L|L L P R (V) 1363.73 80.3071 236.0 32447.4/5.48 Homo sapiens [4757798](#) [3788](#) APG5 autophagy 5-like

| Fragment-ion (m/z)     | 246.99 | 328.18 | 399.31         | 427.34         | 473.32 | 498.29         | 512.32 | 588.15 | 604.43 | 611.43         | 649.48                                          | 657.08                        | 701.23 | 709.71 | 780.32 | 815.16                           | 833.41         | 946.48         | 973.46 | 1017.66        | 1197.77 | 1313.85         |
|------------------------|--------|--------|----------------|----------------|--------|----------------|--------|--------|--------|----------------|-------------------------------------------------|-------------------------------|--------|--------|--------|----------------------------------|----------------|----------------|--------|----------------|---------|-----------------|
| Frac. Inten.(% of TIC) | 2.05   | 1.64   | 1.95           | 2.49           | 1.45   | 5.10           | 2.72   | 1.71   | 2.04   | 16.54          | 2.23                                            | 1.78                          | 3.35   | 1.45   | 1.46   | 1.49                             | 23.04          | 6.55           | 2.06   | 7.97           | 9.51    | 1.41            |
| Rel. Inten.(% of BP)   | 8.89   | 7.11   | 8.48           | 10.80          | 6.31   | 22.12          | 11.79  | 7.44   | 8.86   | 71.80          | 9.70                                            | 7.72                          | 14.54  | 6.31   | 6.32   | 6.46                             | 100.00         | 28.43          | 8.95   | 34.59          | 41.29   | 6.14            |
| Score                  | -0.09  | -0.07  | 0.25           | 1.00           | -0.06  | 1.00           | -0.12  | -0.07  | -0.09  | 1.00           | 0.50                                            | 1.00                          | -0.15  | -0.06  | -0.06  | 0.50                             | 1.00           | 1.00           | -0.09  | 1.00           | -0.41   | 1.00            |
| Ion-type               |        |        | a <sub>4</sub> | b <sub>4</sub> |        | y <sub>4</sub> |        |        |        | y <sub>5</sub> | y <sup>++</sup> <sub>10</sub> -H <sub>2</sub> O | y <sup>++</sup> <sub>10</sub> |        |        |        | b <sub>6</sub> -H <sub>2</sub> O | b <sub>6</sub> | b <sub>7</sub> |        | y <sub>7</sub> |         | y <sub>10</sub> |
| Delta Da               |        |        | 0.12           | 0.16           |        | -0.05          |        |        |        | 0.01           | 0.66                                            | -0.75                         |        |        |        | -0.10                            | 0.13           | 0.12           |        | 0.14           |         | -0.80           |





# Peak 506

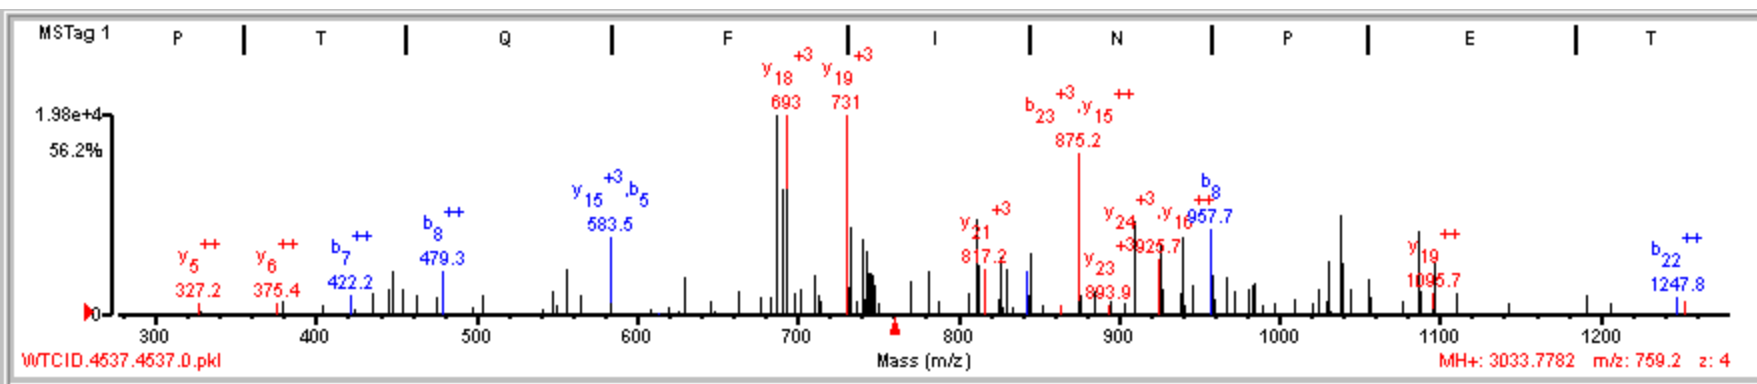

| Rank | Score | SPI (%) | BCS | # Unmatched Ions | Variable sites | Sequence                                                    | MH <sup>+</sup> Calculated (Da) | MH <sup>+</sup> Error (Da) | MH <sup>+</sup> Error (ppm) | Protein MW/pI (Da) | Species      | Accession #              | MS-Digest Index #     | Protein Name |
|------|-------|---------|-----|------------------|----------------|-------------------------------------------------------------|---------------------------------|----------------------------|-----------------------------|--------------------|--------------|--------------------------|-----------------------|--------------|
| 1    | 6.62  | 92.0    | 6   | 1/8              | Y17y           | (K) Q Q P T Q F I N P E T P G Y V G F A N L P N Q V H R (K) | 2952.48                         | 81.3031                    | 440.6                       | 41487.7/6.15       | Homo sapiens | <a href="#">56549640</a> | <a href="#">5642</a>  | septin 2     |
| 1    | 6.62  | 92.0    | 6   | 1/8              | Y17y           | (K) Q Q P T Q F I N P E T P G Y V G F A N L P N Q V H R (K) | 2952.48                         | 81.3031                    | 440.6                       | 41487.7/6.15       | Homo sapiens | <a href="#">56549636</a> | <a href="#">12383</a> | septin 2     |
| 1    | 6.62  | 92.0    | 6   | 1/8              | Y17y           | (K) Q Q P T Q F I N P E T P G Y V G F A N L P N Q V H R (K) | 2952.48                         | 81.3031                    | 440.6                       | 41487.7/6.15       | Homo sapiens | <a href="#">4758158</a>  | <a href="#">18909</a> | septin 2     |
| 1    | 6.62  | 92.0    | 6   | 1/8              | Y17y           | (K) Q Q P T Q F I N P E T P G Y V G F A N L P N Q V H R (K) | 2952.48                         | 81.3031                    | 440.6                       | 41487.7/6.15       | Homo sapiens | <a href="#">56549638</a> | <a href="#">27264</a> | septin 2     |

| Fragment-ion (m/z)      | 686.77             | 690.70            | 692.99             | 731.01             | 812.01 | 875.15             | 925.71            | 1038.95           |
|-------------------------|--------------------|-------------------|--------------------|--------------------|--------|--------------------|-------------------|-------------------|
| Frac. Inten. (% of TIC) | 12.64              | 6.87              | 21.39              | 20.92              | 8.03   | 10.83              | 9.13              | 10.19             |
| Rel. Inten. (% of BP)   | 59.09              | 32.13             | 100.00             | 97.80              | 37.51  | 50.60              | 42.65             | 47.61             |
| Score                   | 1.00               | 1.00              | 1.00               | 1.00               | -0.38  | 1.00               | 1.00              | 1.00              |
| Ion-type                | b+++ <sub>18</sub> | b++ <sub>12</sub> | y+++ <sub>18</sub> | b <sub>6</sub>     |        | b+++ <sub>23</sub> | y++ <sub>16</sub> | y++ <sub>18</sub> |
| Delta Da                | 0.79               | -0.64             | 0.33               | 0.66               |        | 0.41               | 0.27              | 0.46              |
|                         |                    |                   |                    | y+++ <sub>19</sub> |        | y+++ <sub>15</sub> |                   |                   |
|                         |                    |                   |                    |                    |        | 0.23               |                   |                   |



# Peak 509

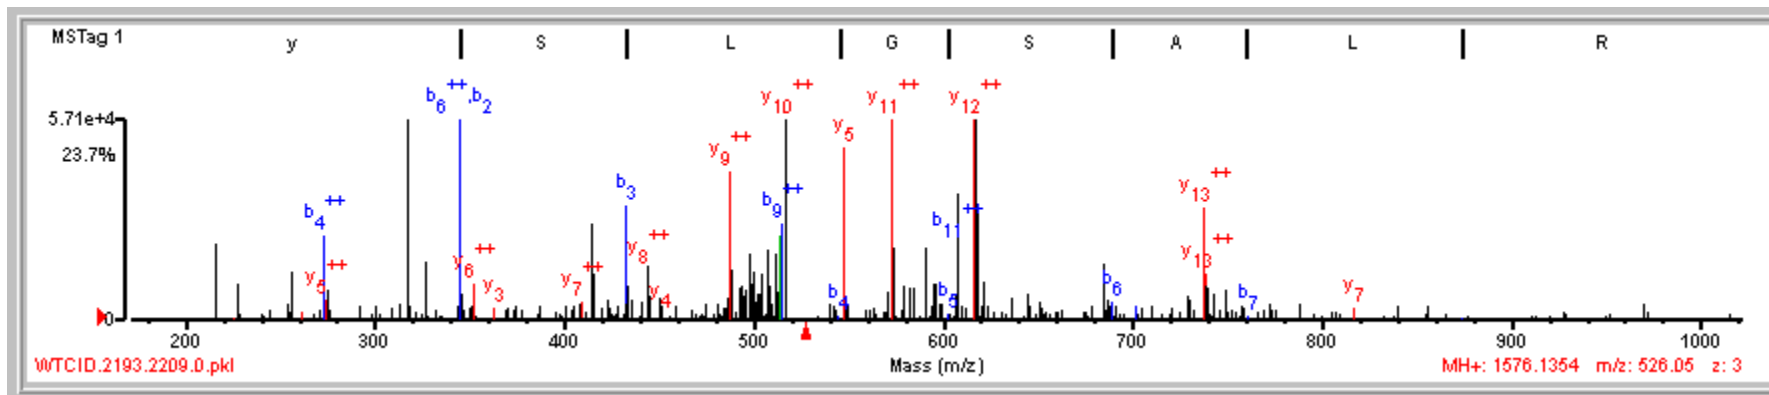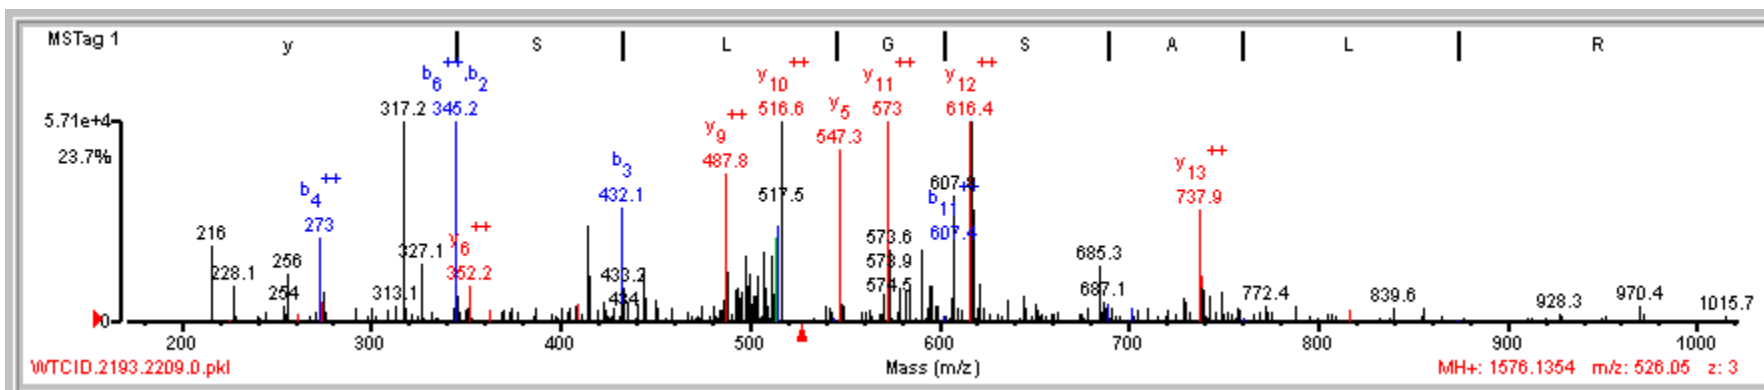

| Rank                    | Score  | SPI (%)           | BCS            | # Unmatched Ions                 | Variable sites                   | Sequence                                              | MH <sup>+</sup> Calculated (Da)  | MH <sup>+</sup> Error (Da) | MH <sup>+</sup> Error (ppm) | Protein MW/pl (Da) | Species      | Accession #              | MS-Digest Index #                    | Protein Name |                    |                |                    |        |                                      |        |                                      |                    |                    |                    |                                  |                    |
|-------------------------|--------|-------------------|----------------|----------------------------------|----------------------------------|-------------------------------------------------------|----------------------------------|----------------------------|-----------------------------|--------------------|--------------|--------------------------|--------------------------------------|--------------|--------------------|----------------|--------------------|--------|--------------------------------------|--------|--------------------------------------|--------------------|--------------------|--------------------|----------------------------------|--------------------|
| 1                       | 14.86  | 90.7              | 9              | 7/25                             | Y38y                             | (R) T / y   S   L / G / S / A / L R / P S / T S R (S) | 1495.79                          | 80.3491                    | 242.9                       | 53651.9/5.06       | Homo sapiens | <a href="#">62414289</a> | <a href="#">16499</a>                | vimentin     |                    |                |                    |        |                                      |        |                                      |                    |                    |                    |                                  |                    |
| Fragment-ion (m/z)      | 215.95 | 273.05            | 317.15         | 327.12                           | 345.20                           | 414.13                                                | 432.12                           | 444.40                     | 487.78                      | 494.25             | 498.24       | 500.34                   | 507.29                               | 512.26       | 516.59             | 547.33         | 573.03             | 590.59 | 595.57                               | 607.38 | 607.84                               | 616.41             | 616.71             | 685.31             | 737.90                           |                    |
| Frac. Inten. (% of TIC) | 1.08   | 1.49              | 4.34           | 0.93                             | 4.80                             | 2.37                                                  | 2.52                             | 1.94                       | 2.99                        | 1.33               | 1.50         | 1.96                     | 2.85                                 | 0.94         | 15.63              | 3.15           | 6.81               | 1.27   | 1.18                                 | 1.08   | 2.42                                 | 8.97               | 23.51              | 1.14               | 3.79                             |                    |
| Rel. Inten. (% of BP)   | 4.61   | 6.36              | 18.46          | 3.96                             | 20.43                            | 10.07                                                 | 10.73                            | 8.24                       | 12.74                       | 5.66               | 6.37         | 8.36                     | 12.11                                | 4.01         | 66.51              | 13.39          | 28.98              | 5.39   | 5.01                                 | 4.61   | 10.28                                | 38.14              | 100.00             | 4.85               | 16.12                            |                    |
| Score                   | -0.05  | 1.00              | 0.25           | 0.50                             | 1.00                             | 0.50                                                  | 1.00                             | 1.00                       | 1.00                        | -0.06              | -0.06        | -0.08                    | 0.50                                 | -0.04        | 1.00               | 1.00           | 1.00               | -0.05  | -0.05                                | 1.00   | 1.00                                 | 1.00               | 1.00               | 0.50               | 1.00                             |                    |
| Ion-type                |        | y+++ <sub>7</sub> | a <sub>2</sub> | b <sub>2</sub> -H <sub>2</sub> O | b <sub>2</sub>                   | b <sub>3</sub> -H <sub>2</sub> O                      | b <sub>3</sub>                   | y+++ <sub>8</sub>          | y+++ <sub>9</sub>           |                    |              |                          | y+++ <sub>10</sub> -H <sub>2</sub> O |              | a <sub>4</sub>     | y <sub>5</sub> | y+++ <sub>11</sub> |        |                                      |        | b+++ <sub>11</sub>                   | b+++ <sub>11</sub> | y+++ <sub>12</sub> | y+++ <sub>12</sub> | y <sub>6</sub> -H <sub>2</sub> O | y+++ <sub>13</sub> |
| Delta Da                |        | 0.22              | 0.06           | 0.05                             | 0.12                             | 0.02                                                  | 0.00                             | 0.14                       | 0.01                        |                    |              |                          | 0.01                                 |              | -0.62              | 0.05           | 0.20               |        |                                      | 0.10   | 0.56                                 | 0.07               | 0.37               | -0.06              | 0.04                             |                    |
|                         |        |                   |                |                                  | y <sub>3</sub> -H <sub>2</sub> O |                                                       | y <sub>4</sub> -H <sub>2</sub> O |                            |                             |                    |              |                          |                                      |              | y+++ <sub>10</sub> |                |                    |        | y+++ <sub>12</sub> -H <sub>2</sub> O |        | y+++ <sub>12</sub> -H <sub>2</sub> O |                    |                    |                    |                                  |                    |

# Peak 510

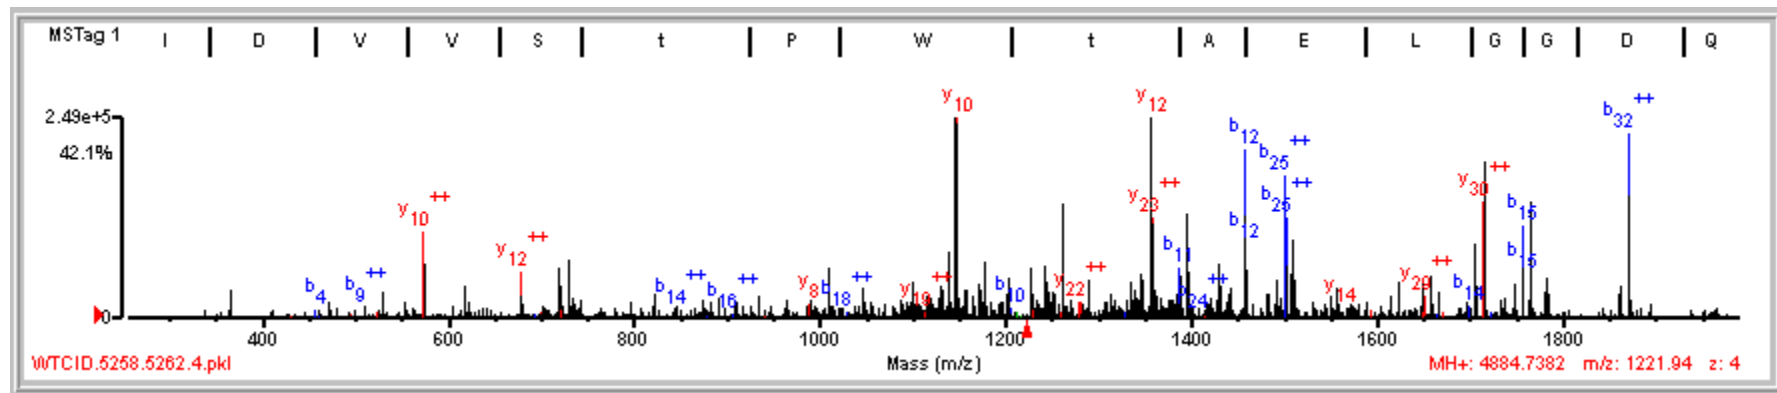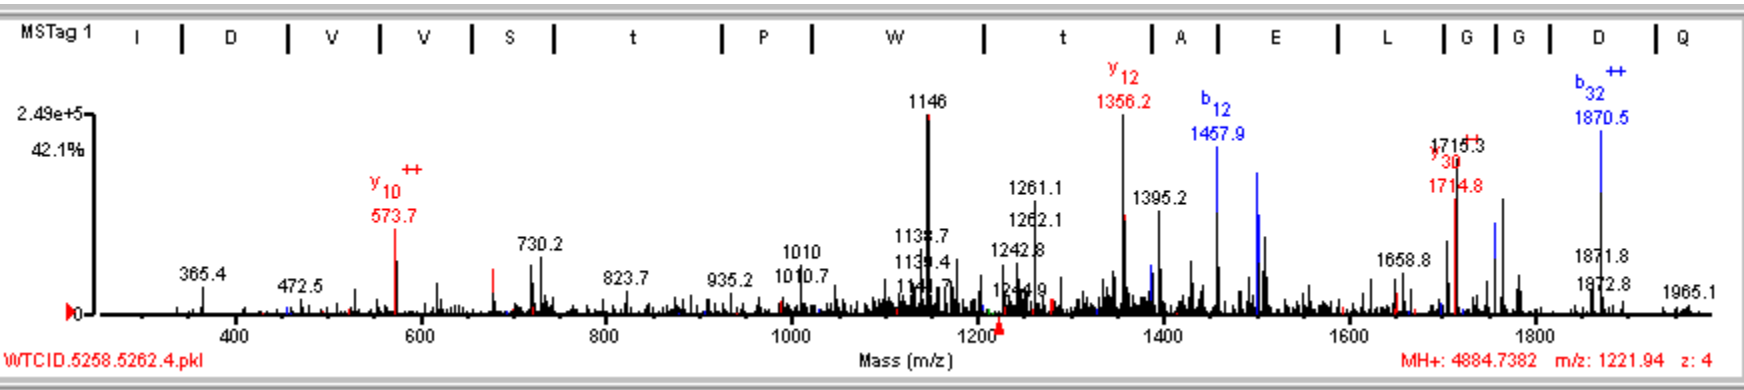

| Fragment-ion (m/z)     | 573.66                         | 678.71                         | 719.70 | 1130.02                          | 1138.71 | 1146.01         | 1146.89         | 1177.89                        | 1242.83                          | 1261.09 | 1356.20         | 1357.06         | 1395.17 | 1397.64 | 1430.00                        | 1457.88         | 1491.85 | 1501.72                        | 1510.35 | 1706.14                                          | 1714.75                        | 1715.33                        | 1756.73                                          | 1765.78                        | 1870.51                        |
|------------------------|--------------------------------|--------------------------------|--------|----------------------------------|---------|-----------------|-----------------|--------------------------------|----------------------------------|---------|-----------------|-----------------|---------|---------|--------------------------------|-----------------|---------|--------------------------------|---------|--------------------------------------------------|--------------------------------|--------------------------------|--------------------------------------------------|--------------------------------|--------------------------------|
| Frac. Inten.(% of TIC) | 3.76                           | 2.03                           | 1.58   | 1.56                             | 2.29    | 4.61            | 10.19           | 1.85                           | 1.89                             | 4.10    | 5.86            | 17.31           | 2.16    | 1.66    | 1.98                           | 5.97            | 1.66    | 5.27                           | 2.04    | 2.28                                             | 1.89                           | 4.80                           | 4.04                                             | 2.89                           | 6.32                           |
| Rel. Inten.(% of BP)   | 21.73                          | 11.75                          | 9.15   | 9.01                             | 13.23   | 26.66           | 58.89           | 10.69                          | 10.89                            | 23.69   | 33.88           | 100.00          | 12.48   | 9.61    | 11.43                          | 34.51           | 9.56    | 30.45                          | 11.81   | 13.17                                            | 10.91                          | 27.74                          | 23.32                                            | 16.70                          | 36.49                          |
| Score                  | 1.00                           | 1.00                           | -0.09  | 0.50                             | -0.13   | 1.00            | 1.00            | 1.00                           | 0.50                             | -0.24   | 1.00            | 1.00            | -0.12   | -0.10   | 1.00                           | 1.00            | -0.10   | 1.00                           | -0.12   | 0.50                                             | 1.00                           | 1.00                           | 1.00                                             | 1.00                           | 1.00                           |
| Ion-type               | y <sup>+++</sup> <sub>10</sub> | y <sup>+++</sup> <sub>12</sub> |        | y <sub>10</sub> -NH <sub>3</sub> |         | y <sub>10</sub> | y <sub>10</sub> | a <sub>10</sub>                | y <sub>11</sub> -NH <sub>3</sub> |         | y <sub>12</sub> | y <sub>12</sub> |         |         | a <sub>12</sub>                | b <sub>12</sub> |         | b <sup>+++</sup> <sub>25</sub> |         | y <sup>+++</sup> <sub>30</sub> -H <sub>2</sub> O | y <sup>+++</sup> <sub>30</sub> | y <sup>+++</sup> <sub>30</sub> |                                                  | b <sup>+++</sup> <sub>30</sub> | b <sup>+++</sup> <sub>32</sub> |
| Delta Da               | -0.09                          | -0.11                          |        | 0.56                             |         | -0.48           | 0.40            |                                | 0.32                             | 0.29    | -0.42           | 0.44            |         |         | 0.38                           | 0.27            |         | -0.42                          |         | 0.35                                             | -0.05                          | 0.53                           |                                                  | -0.03                          | 0.49                           |
|                        |                                |                                |        |                                  |         |                 |                 | b <sup>+++</sup> <sub>30</sub> |                                  |         |                 |                 |         |         | b <sup>+++</sup> <sub>37</sub> |                 |         |                                |         |                                                  |                                |                                | b <sup>+++</sup> <sub>30</sub> -H <sub>2</sub> O |                                |                                |
|                        |                                |                                |        |                                  |         |                 |                 | 0.69                           |                                  |         |                 |                 |         |         | 0.34                           |                 |         |                                |         | 0.35                                             | -0.05                          | 0.53                           | 0.44                                             |                                | 0.15                           |

# Peak 511

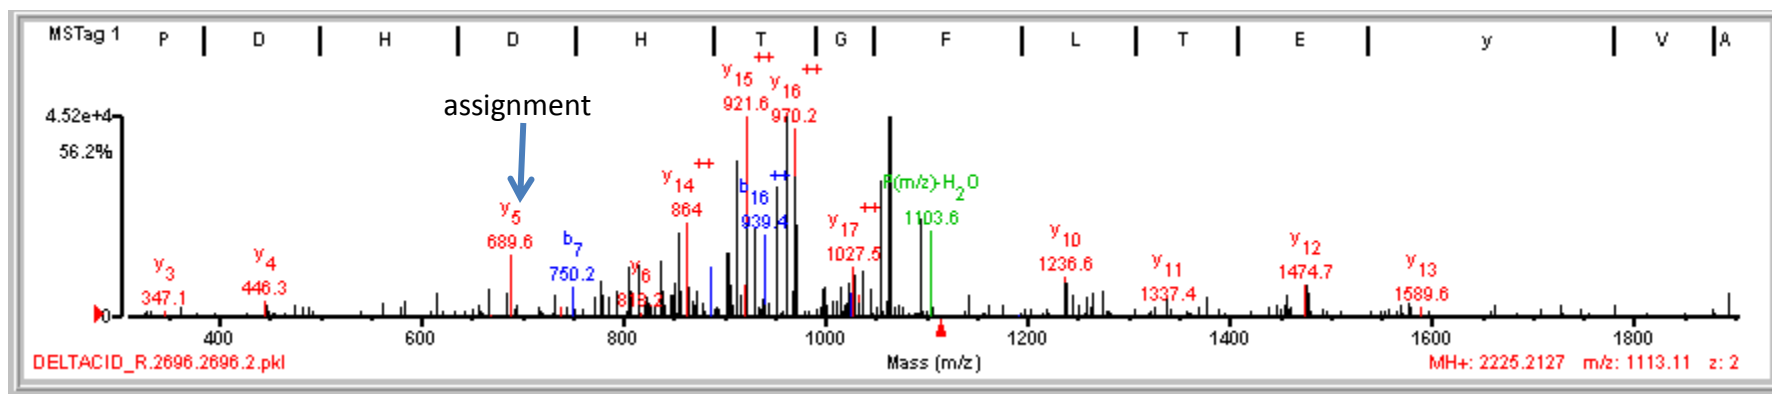

| Rank                    | Score          | SPI (%) | BCS    | # Unmatched Ions | Variable sites | Sequence                                      | MH <sup>+</sup> Calculated (Da)                 | MH <sup>+</sup> Error (Da)    | MH <sup>+</sup> Error (ppm) | Protein MW/pl (Da)              | Species                                         | Accession #                   | MS-Digest Index #                               | Protein Name                       |        |                                                 |                                  |                                   |                |         |                               |                 |                 |         |
|-------------------------|----------------|---------|--------|------------------|----------------|-----------------------------------------------|-------------------------------------------------|-------------------------------|-----------------------------|---------------------------------|-------------------------------------------------|-------------------------------|-------------------------------------------------|------------------------------------|--------|-------------------------------------------------|----------------------------------|-----------------------------------|----------------|---------|-------------------------------|-----------------|-----------------|---------|
| 1                       | 13.29          | 75.8    | 11     | 8/24             | Y187y          | (R) V/A/D/P/D/H D/H/T/G F/L T E/Y V\A T R (W) | 2144.00                                         | 81.2084                       | 558.2                       | 41389.9/6.50                    | Homo sapiens                                    | <a href="#">66932916</a>      | <a href="#">20787</a>                           | mitogen-activated protein kinase 1 |        |                                                 |                                  |                                   |                |         |                               |                 |                 |         |
| 1                       | 13.29          | 75.8    | 11     | 8/24             | Y187y          | (R) V/A/D/P/D/H D/H/T/G F/L T E/Y V\A T R (W) | 2144.00                                         | 81.2084                       | 558.2                       | 41389.9/6.50                    | Homo sapiens                                    | <a href="#">20986531</a>      | <a href="#">21374</a>                           | mitogen-activated protein kinase 1 |        |                                                 |                                  |                                   |                |         |                               |                 |                 |         |
| Fragment-ion (m/z)      | 689.58         | 777.98  | 806.29 | 815.36           | 836.89         | 839.50                                        | 854.91                                          | 863.97                        | 887.25                      | 903.04                          | 912.30                                          | 921.64                        | 930.27                                          | 939.37                             | 952.36 | 961.43                                          | 970.17                           | 1027.50                           | 1032.80        | 1054.94 | 1063.71                       | 1236.65         | 1474.71         | 1476.71 |
| Frac. Inten. (% of TIC) | 1.89           | 1.80    | 2.29   | 2.13             | 1.67           | 1.94                                          | 4.08                                            | 3.93                          | 1.70                        | 4.76                            | 6.68                                            | 11.27                         | 3.21                                            | 2.42                               | 5.28   | 14.15                                           | 12.61                            | 3.19                              | 1.36           | 7.38    | 0.52                          | 2.33            | 1.72            | 1.68    |
| Rel. Inten. (% of BP)   | 13.39          | 12.70   | 16.19  | 15.07            | 11.81          | 13.73                                         | 28.84                                           | 27.80                         | 12.02                       | 33.64                           | 47.23                                           | 79.64                         | 22.67                                           | 17.10                              | 37.35  | 100.00                                          | 89.12                            | 22.59                             | 9.64           | 52.14   | 3.70                          | 16.47           | 12.18           | 11.91   |
| Score                   | 1.00           | -0.13   | -0.16  | -0.15            | -0.12          | -0.14                                         | 0.50                                            | 1.00                          | 1.00                        | 0.50                            | 0.50                                            | 1.00                          | 0.50                                            | 1.00                               | -0.37  | 0.50                                            | 1.00                             | 1.00                              | 1.00           | -0.52   | 1.50                          | 1.00            | 1.00            | -0.12   |
| Ion-type                | y <sub>5</sub> |         |        |                  |                |                                               | y <sup>++</sup> <sub>14</sub> -H <sub>2</sub> O | y <sup>++</sup> <sub>14</sub> | b <sub>8</sub>              | y <sub>7</sub> -NH <sub>3</sub> | y <sup>++</sup> <sub>15</sub> -H <sub>2</sub> O | y <sup>++</sup> <sub>15</sub> | b <sup>++</sup> <sub>16</sub> -H <sub>2</sub> O | b <sup>++</sup> <sub>16</sub>      |        | y <sup>++</sup> <sub>16</sub> -H <sub>2</sub> O | b <sub>9</sub> -H <sub>2</sub> O | b <sub>10</sub> -H <sub>2</sub> O | y <sub>8</sub> |         | y <sup>++</sup> <sub>18</sub> | y <sub>10</sub> | y <sub>12</sub> |         |
| Delta Da                | 0.28           |         |        |                  |                |                                               | 0.03                                            | 0.09                          | -0.11                       | 0.67                            | -0.09                                           | 0.24                          | -0.12                                           | -0.02                              |        | 0.51                                            | -0.23                            | 0.08                              | 0.32           |         | 0.76                          | 0.08            | 0.04            |         |
|                         |                |         |        |                  |                |                                               |                                                 |                               |                             |                                 |                                                 |                               |                                                 |                                    |        |                                                 | y <sup>++</sup> <sub>16</sub>    | y <sup>++</sup> <sub>17</sub>     |                |         | 1.50                          |                 |                 |         |
|                         |                |         |        |                  |                |                                               |                                                 |                               |                             |                                 |                                                 |                               |                                                 |                                    |        |                                                 | 0.25                             | 0.06                              |                |         | sty                           |                 |                 |         |
|                         |                |         |        |                  |                |                                               |                                                 |                               |                             |                                 |                                                 |                               |                                                 |                                    |        |                                                 |                                  |                                   |                |         | 0.21                          |                 |                 |         |

# Peak 512

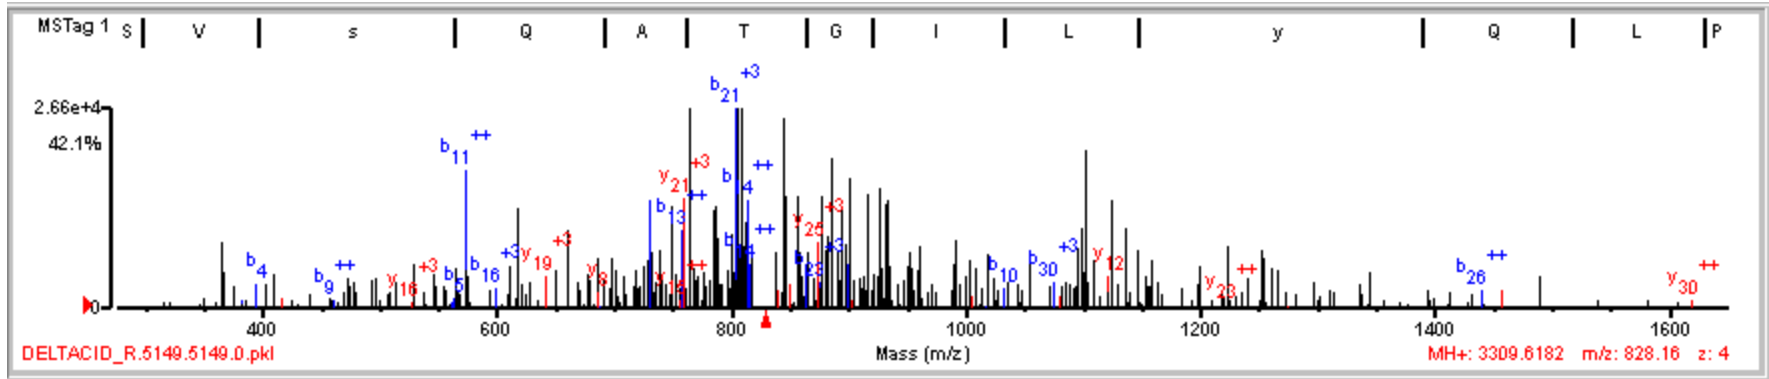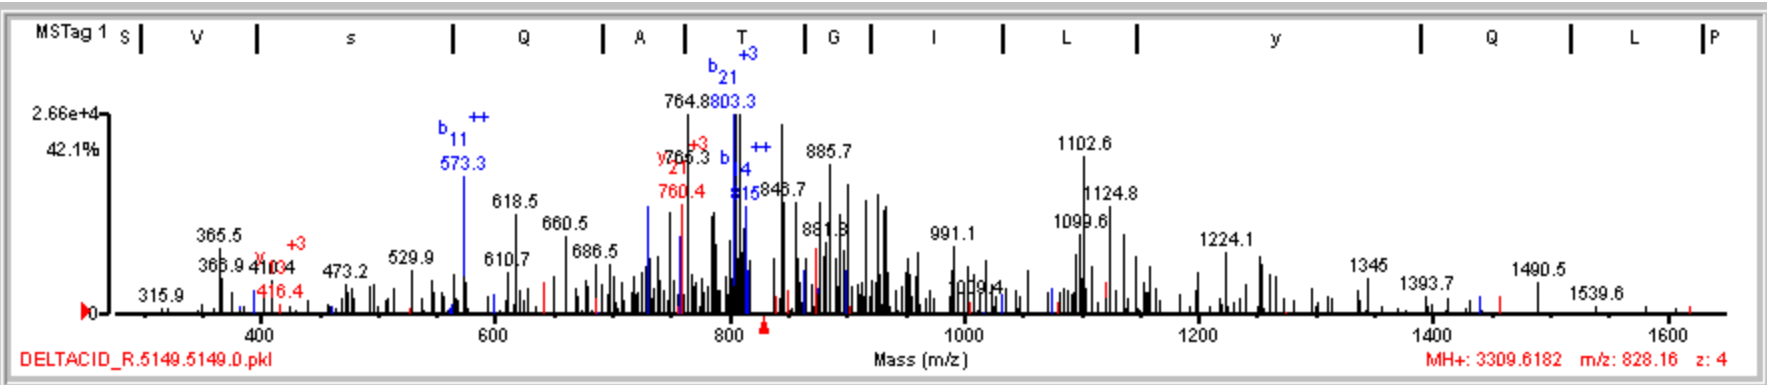

| Rank                    | Score                          | SPI (%)                        | BCS                            | # Unmatched Ions                               | Variable sites    | Sequence                                                             | MH* Calculated (Da)           | MH* Error (Da)                  | MH* Error (ppm)                | Protein MW/pl (Da)               | Species        | Accession #                    | MS-Digest Index #               | Protein Name                   |                                |                                                 |                                   |        |        |        |         |         |         |
|-------------------------|--------------------------------|--------------------------------|--------------------------------|------------------------------------------------|-------------------|----------------------------------------------------------------------|-------------------------------|---------------------------------|--------------------------------|----------------------------------|----------------|--------------------------------|---------------------------------|--------------------------------|--------------------------------|-------------------------------------------------|-----------------------------------|--------|--------|--------|---------|---------|---------|
| 1                       | 11.05                          | 72.1                           | 9                              | 6/23                                           | Y248y S239s S253s | (R)A H s V S/Q/A T G I/L y Q/L P A s P Q A F/Q S P G T L G A T A (-) | 3069.56                       | 240.0542                        | 46.9                           | 29433.7/4.85                     | Homo sapiens   | <a href="#">T2534746</a>       | <a href="#">37651</a>           | tetraspanin 18 isoform 1       |                                |                                                 |                                   |        |        |        |         |         |         |
| Fragment-ion (m/z)      | 573.32                         | 731.05                         | 760.37                         | 764.77                                         | 786.16            | 803.26                                                               | 806.09                        | 809.13                          | 814.95                         | 844.72                           | 859.28         | 874.20                         | 885.69                          | 891.42                         | 894.74                         | 898.05                                          | 901.87                            | 917.34 | 927.27 | 934.39 | 1099.65 | 1102.56 | 1124.78 |
| Frac. Inten. (% of TIC) | 4.34                           | 3.52                           | 2.72                           | 12.69                                          | 5.21              | 0.24                                                                 | 9.47                          | 12.40                           | 3.18                           | 8.45                             | 2.75           | 2.99                           | 4.27                            | 3.27                           | 2.58                           | 2.32                                            | 2.85                              | 2.37   | 2.49   | 3.65   | 2.40    | 3.27    | 2.55    |
| Rel. Inten. (% of BP)   | 34.18                          | 27.71                          | 21.44                          | 100.00                                         | 41.02             | 1.90                                                                 | 74.59                         | 97.72                           | 25.05                          | 66.60                            | 21.65          | 23.57                          | 33.65                           | 25.74                          | 20.36                          | 18.31                                           | 22.46                             | 18.68  | 19.62  | 28.78  | 18.94   | 25.76   | 20.10   |
| Score                   | 1.00                           | 1.00                           | 1.00                           | 0.25                                           | -0.41             | 1.50                                                                 | 0.50                          | -0.98                           | 1.00                           | 0.50                             | -0.22          | 1.00                           | 0.50                            | 0.25                           | -0.20                          | 1.00                                            | 1.00                              | 1.00   | 1.00   | 0.25   | -0.19   | 0.50    | -0.20   |
| Ion-type                | b <sup>+++</sup> <sub>11</sub> | b <sup>+++</sup> <sub>19</sub> | y <sup>+++</sup> <sub>21</sub> | b <sub>3</sub> -H <sub>3</sub> PO <sub>4</sub> | sty               | b <sup>++</sup> <sub>14</sub> -H <sub>2</sub> O                      | b <sup>++</sup> <sub>14</sub> | b <sub>8</sub> -NH <sub>3</sub> | y <sup>+++</sup> <sub>25</sub> | y <sub>10</sub> -NH <sub>3</sub> | a <sub>9</sub> | y <sup>+++</sup> <sub>18</sub> | b <sub>9</sub> -NH <sub>3</sub> | y <sup>+++</sup> <sub>26</sub> | b <sup>+++</sup> <sub>25</sub> | b <sub>10</sub> -H <sub>3</sub> PO <sub>4</sub> | y <sub>12</sub> -H <sub>2</sub> O |        |        |        |         |         |         |
| Delta Da                | 0.05                           | 0.41                           | 0.36                           | 0.40                                           | -0.37             | -0.26                                                                |                               |                                 | -0.41                          | -0.60                            | 0.13           | 0.26                           | 0.05                            |                                | 0.62                           |                                                 | -0.47                             | 0.58   | 0.87   | -0.08  |         | 0.01    |         |
